# Supplementary material for: NICEdrug.ch, a workflow for rational drug design and systems-level analysis of drug metabolism
Source: eLife. 2021 Aug 3;10:e65543. doi: 10.7554/eLife.65543 (PMC8331181; doi:10.7554/eLife.65543)
Supplement: Supplementary file 1. — (A) List of cofactors, (B) list of metabolites, and (C) list of EC numbers considered in BNICE.ch for the generation of reactions in the analysis of drug metabolism in a human cell (‘Materials and methods’). [file elife-65543-supp1.xlsx]

## Sheet: summary
Tab in Supplementary_File_1	Description of each tab/section in Supplementary_File_1, related to Figure 2, 3, 4, 5, and 6
S1.1	List of cofactors considered in BNICE.ch for the generation of reactions in the analysis of drug metabolism in a human cell
S1.2	List of metabolites considered in BNICE.ch for the generation of reactions in the analysis of drug metabolism in a human cell
S1.3	List of E.C.considered in BNICE.ch for the generation of reactions in the analysis of drug metabolism in a human cell

## Sheet: S1.1
Cofactors name
NAD+
NADH
H+
NADP+
NADPH
CO2
Water
Pi
CoA
O2
Ubiquinone
Ubiquinol
H2O2
FAD
FADH2
Ammonia
Glycine
HI
Tetrahydrobiopterin
FMNH2
FMN
Thioredoxin-disulfide
Thioredoxin
S-Adenosylmethionine
S-Adenosylhomocysteine
5-Methyl-H4MPT
H4MPT
L-Homocysteine
L-Methionine
Carbamoyl-phosphate
AcetylCoa
AcylCoA
UDP-glucose
UDP-glucuronate
UDP-N-acetyl-D-glucosamine
GDP-mannose
GDP
UDP-L-rhamnose
UDP
PPi
S-Adenosylmethioninamine
ATP
ADP
Pyruvate
AMP
3-Phosphoadenylyl-sulfate
GTP
Glutamine
Glutamate
Indole
Formate
Bicarbonate
Orthophosphate

## Sheet: S1.2
Name of metabolites	Molecule NICEdrug ID	SMILES of metabolites
Coumarin	3485	O=c1ccc2c(o1)cccc2
2-pyridinecarboxylic acid	10907	OC(=O)c1ccccn1
15-hydroperoxyicosa-5,8,11,13,17-pentaenoic acid	15302	CCC=CCC(C=CC=CCC=CCC=CCCCC(=O)O)OO
3-[18-(2-carboxyethyl)-3,7,12,17-tetramethyl-8,13-divinyl-22,23-dihydroporphyrin-2-yl]propanoic acid	52041	C=Cc1c2C=C3N=C(C(=C3C)CCC(=O)O)C=C3N=C(C=c4[nH]c(=Cc(c1C)[nH]2)c(C=C)c4C)C(=C3CCC(=O)O)C
4-[(3-butoxy-4-methoxyphenyl)methyl]-2-imidazolidinone	53197	CCCCOc1cc(ccc1OC)CC1CNC(=O)N1
phenylurea	64027	NC(=O)Nc1ccccc1
2,2-bis(hydroxymethyl)propane-1,3-diol	86650	OCC(CO)(CO)CO
1-amino-3-phenylurea	112044	NNC(=O)Nc1ccccc1
1,2,3,4,5,6,7,8-octachloronaphthalene	171549	Clc1c(Cl)c(Cl)c(c2c1c(Cl)c(c(c2Cl)Cl)Cl)Cl
6-chloropyridazin-3-amine	220898	Nc1ccc(nn1)Cl
7,12-dimethylbenzo[a]anthracene-3,4-diol	510873	Oc1ccc2c(c1O)ccc1c2c(C)c2ccccc2c1C
[[[[(amino-$l^{4}-sulfanylidyne)methylamino]-methylphosphoryl]amino]-$l^{4}-sulfanylidyne]methanamine	538131	NS#CNP(=O)(NS#CN)C
3,5-dimethylhex-1-yn-3-ol	603497	CC(CC(C#C)(O)C)C
(2S)-1-[(2S)-2-[[(2S)-2-[[(2S)-2-acetamido-3-hydroxy-propanoyl]amino]-3-carboxy-propanoyl]amino]-6-amino-hexanoyl]pyrrolidine-2-carboxylic acid	651601	NCCCCC(C(=O)N1CCCC1C(=O)O)NC(=O)C(NC(=O)C(NC(=O)C)CO)CC(=O)O
4-fluoro-2-(trifluoromethyl)aniline	671468	Fc1ccc(c(c1)C(F)(F)F)N
3-[7,12,17-tris(2-carboxyethyl)-3,8,13,18-tetramethyl-21,22-dihydroporphyrin-2-yl]propanoic acid	675836	OC(=O)CCC1=C(C)C2=NC1=Cc1[nH]c(c(c1C)CCC(=O)O)C=c1[nH]c(=CC3=NC(=C2)C(=C3C)CCC(=O)O)c(c1C)CCC(=O)O
1-iodo-4-methoxybenzene	690337	COc1ccc(cc1)I
3-(cyclohexylamino)propane-1-sulfonic acid	702364	OS(=O)(=O)CCCNC1CCCCC1
(2S)-6-amino-2-[[(2S)-6-amino-2-[[(2S)-2,6-diaminohexanoyl]amino]hexanoyl]amino]hexanoic acid	717090	NCCCCC(C(=O)NC(C(=O)O)CCCCN)NC(=O)C(CCCCN)N
3-[7,12,18-tris(2-carboxyethyl)-3,8,13,17-tetrakis(carboxymethyl)-21,24-dihydroporphyrin-2-yl]propanoic acid	717633	OC(=O)CCC1=C(CC(=O)O)C2=NC1=Cc1[nH]c(c(c1CC(=O)O)CCC(=O)O)C=c1[nH]c(=CC3=NC(=C2)C(=C3CC(=O)O)CCC(=O)O)c(c1CCC(=O)O)CC(=O)O
3-[7,12,17-tris(2-carboxyethyl)-3,8,13,18-tetrakis(carboxymethyl)-21,22-dihydroporphyrin-2-yl]propanoic acid	717644	OC(=O)CCC1=C(CC(=O)O)C2=NC1=Cc1[nH]c(c(c1CC(=O)O)CCC(=O)O)C=c1[nH]c(=CC3=NC(=C2)C(=C3CC(=O)O)CCC(=O)O)c(c1CC(=O)O)CCC(=O)O
dimethyl 3-oxopentanedioate	737739	COC(=O)CC(=O)CC(=O)OC
ethyl 2-acetamidoacetate	738901	CCOC(=O)CNC(=O)C
N-(hydroxymethyl)pyridine-3-carboxamide	1907912	OCNC(=O)c1cccnc1
5-bromopyrimidine	1920505	Brc1cncnc1
2-(3-hydroxy-3,7,11,15-tetramethylhexadecyl)-3,5,6-trimethylbenzene-1,4-diol	1993564	CC(CCCC(CCCC(C)C)C)CCCC(CCc1c(O)c(C)c(c(c1C)O)C)(O)C
chroman-4-ol	2065846	OC1CCOc2c1cccc2
4,5-Dihydroxybenzo[a]pyrene	2211961	Oc1c(O)c2cccc3c2c2c1cc1ccccc1c2cc3
3-[8,13,18-tris(2-carboxyethyl)-3,7,12,17-tetramethyl-21,24-dihydroporphyrin-2-yl]propanoic acid	2280350	OC(=O)CCC1=C(C)C2=NC1=Cc1[nH]c(c(c1C)CCC(=O)O)C=c1[nH]c(=CC3=NC(=C2)C(=C3C)CCC(=O)O)c(c1CCC(=O)O)C
(2R)-3,7-dimethyl-9-(2,6,6-trimethylcyclohex-2-en-1-ylidene)nona-3,5,7-triene-1,2-diol	2322569	OCC(C(=CC=CC(=CC=C1C(=CCCC1(C)C)C)C)C)O
pentane	2358715	CCCC[CH2]
5,12,20-trihydroxyicosa-6,8,14-trienoic acid	2371930	OCCCCCC=CCC(CCC=CC=CC(CCCC(=O)O)O)O
3-[(2-amino-2-carboxyethyl)thio]-3-(1H-imidazol-5-yl)propanoic acid	2385371	OC(=O)CC(c1[nH]cnc1)SCC(C(=O)O)N
(6-acetoxy-5,7-dimethoxy-9-oxo-fluoren-1-yl) acetate	2393218	COc1cc2C(=O)c3c(c2c(c1OC(=O)C)OC)cccc3OC(=O)C
3-(6-hydroxy-2,7,8-trimethyl-chroman-2-yl)propanoic acid	2447224	OC(=O)CCC1(C)CCc2c(O1)c(C)c(c(c2)O)C
(2S)-2-[[(2S)-1-[(2R)-2-amino-3-phenyl-propanoyl]pyrrolidine-2-carbonyl]amino]-5-guanidino-pentanoic acid	2448100	OC(=O)C(NC(=O)C1CCCN1C(=O)C(Cc1ccccc1)N)CCCN=C(N)N
3-(4-aminobutylamino)propanal	2573766	NCCCCNCCC=O
2-[[(2S)-2-[[(2S)-2-aminopropanoyl]amino]-5-guanidino-pentanoyl]amino]acetic acid	2599189	OC(=O)CNC(=O)C(NC(=O)C(N)C)CCCN=C(N)N
tetracosa-2,4,6,8-tetraenoic acid	2642645	CCCCCCCCCCCCCCCC=CC=CC=CC=CC(=O)O
2,3-dihydro-1H-indole-5,6-dione	2799094	O=C1C=C2NCCC2=CC1=O
2-(4-chlorophenyl)-5-methyl-3-pyrazolamine	2799504	Clc1ccc(cc1)n1nc(cc1N)C
(2S)-6-amino-2-[[(2S)-2-[(2-aminoacetyl)amino]-3-(4-hydroxyphenyl)propanoyl]amino]hexanoic acid	2999506	NCCCCC(C(=O)O)NC(=O)C(Cc1ccc(cc1)O)NC(=O)CN
2-amino-6-methyl-5-(4-pyridyl)pyridine-3-carbonitrile	3030302	N#Cc1cc(c2ccncc2)c(nc1N)C
(2S)-2-amino-3-[3-[[(2R)-2-amino-3-(carboxymethylamino)-3-oxopropyl]thio]-4,5-dihydroxyphenyl]propanoic acid	3039037	OC(=O)CNC(=O)C(CSc1cc(CC(C(=O)O)N)cc(c1O)O)N
2-[[2-[(2-amino-5-guanidino-pentanoyl)amino]acetyl]amino]acetic acid	4402037	O=C(NCC(=O)O)CNC(=O)C(CCCN=C(N)N)N
3,7,11-trimethyldodeca-6,10-dienyl dihydrogen phosphate	5404608	CC(CCC=C(CCC=C(C)C)C)CCOP(=O)(O)O
3-[7,12-bis[1-[[2-amino-3-(methylamino)-3-oxopropyl]thio]ethyl]-18-(2-carboxyethyl)-3,8,13,17-tetramethyl-2-porphyrin-21,23-diidyl]propanoic acid;iron(2+)	5404652	CNC(=O)C(CSC(C1=C(C)C2=Cc3[n-]c(c(c3C(SCC(C(=O)NC)N)C)C)C=C3N=C(C=c4[n-]c(=CC1=N2)c(C)c4CCC(=O)O)C(=C3C)CCC(=O)O)C)N.[Fe+2]
(2-formyloxy-3-phosphonooxy-propyl) pentanoate	5479805	CCCCC(=O)OCC(COP(=O)(O)O)OC=O
4-(2-pyridyl)aniline	5584767	Nc1ccc(cc1)c1ccccn1
(4R)-4-[(3R,5R,7R,8R,9S,10S,12S,13R,14S,17R)-7,12-dihydroxy-10,13-dimethyl-3-sulfooxy-2,3,4,5,6,7,8,9,11,12,14,15,16,17-tetradecahydro-1H-cyclopenta[a]phenanthren-17-yl]pentanoic acid	5632812	OC(=O)CCC(C1CCC2C1(C)C(O)CC1C2C(O)CC2C1(C)CCC(C2)OS(=O)(=O)O)C
(2S)-2-[[(2S)-4-amino-2-[[(2S)-2-amino-4-carboxy-butanoyl]amino]-4-oxo-butanoyl]amino]-4-methyl-pentanoic acid	5684550	CC(CC(C(=O)O)NC(=O)C(NC(=O)C(CCC(=O)O)N)CC(=O)N)C
2-[2-[[2-amino-3-(4-hydroxyphenyl)propanoyl]amino]propanoylamino]-3-phenyl-propanoic acid	6525091	Oc1ccc(cc1)CC(C(=O)NC(C(=O)NC(C(=O)O)Cc1ccccc1)C)N
3-pyridylboronic acid	26203768	OB(c1cccnc1)O
4-(4,4,5,5-tetramethyl-1,3,2-dioxaborolan-2-yl)aniline	26206398	CC1(C)OB(OC1(C)C)c1ccc(cc1)N
(2S)-2-[[(2S)-6-amino-2-[[(2S)-2-amino-5-guanidino-pentanoyl]amino]hexanoyl]amino]butanedioic acid	29299730	NCCCCC(C(=O)NC(C(=O)O)CC(=O)O)NC(=O)C(CCCN=C(N)N)N
5-[1-carboxy-2-(trimethylammonio)ethoxy]-5-oxopentanoate	29318191	[O-]C(=O)CCCC(=O)OC(C(=O)O)C[N+](C)(C)C
5-[2-[[3-[[(2R)-4-[[[(2R,3S,4R,5R)-5-(6-aminopurin-9-yl)-4-hydroxy-3-phosphonooxy-2-oxolanyl]methoxy-hydroxyphosphoryl]oxy-hydroxyphosphoryl]oxy-2-hydroxy-3,3-dimethyl-1-oxobutyl]amino]-1-oxopropyl]amino]ethylthio]-3-hydroxy-5-oxopentanoic acid	29762995	OC(CC(=O)SCCNC(=O)CCNC(=O)C(C(COP(=O)(OP(=O)(OCC1OC(C(C1OP(=O)(O)O)O)n1cnc2c1ncnc2N)O)O)(C)C)O)CC(=O)O
sodium;(2S,3S,4S,5R,6R)-6-[[(2S,3R,4R,5S,6R)-3-acetamido-2-[[(2S,3S,4R,5R,6R)-6-[[(2R,3R,4R,5S,6R)-3-acetamido-2,5-dihydroxy-6-(hydroxymethyl)-4-oxanyl]oxy]-2-carboxy-4,5-dihydroxy-3-oxanyl]oxy]-5-hydroxy-6-(hydroxymethyl)-4-oxanyl]oxy]-3,4,5-trihydroxy-2-oxanecarboxylic acid	29777533	OCC1OC(OC2C(OC(C(C2O)O)OC2C(NC(=O)C)C(O)OC(C2O)CO)C(=O)O)C(C(C1O)OC1OC(C(=O)O)C(C(C1O)O)O)NC(=O)C.[Na+]
(5S)-5-hydroperoxyicosa-6,8,11,14,17-pentaenoic acid	31478336	CCC=CCC=CCC=CCC=CC=CC(CCCC(=O)O)OO
cobalt;[5-(5,6-dimethyl-1-benzimidazolyl)-4-hydroxy-2-(hydroxymethyl)-3-oxolanyl] 1-[[1-oxo-3-[2,13,18-tris(2-amino-2-oxoethyl)-7,12,17-tris(3-amino-3-oxopropyl)-3,5,8,8,13,15,18,19-octamethyl-2,7,12,17-tetrahydro-1H-corrin-21-id-3-yl]propyl]amino]propan-2-yl phosphate;hydrate	44298599	OCC1OC(C(C1OP(=O)(OC(CNC(=O)CCC1(C)C2=C(C)C3=NC(=CC4=NC(=C(C5=NC(C(C1CC(=O)N)[N-]2)(C)C(C)(CC(=O)N)C5CCC(=O)N)C)C(C4CCC(=O)N)(C)CC(=O)N)C(C3CCC(=O)N)(C)C)C)[O-])O)n1cnc2c1cc(C)c(c2)C.O.[Co]
7-octadecenoic acid	45566699	CCCCCCCCCCC=CCCCCCC(=O)O
Harman	52622763	Cc1nccc2c1[nH]c1c2cccc1
[(2R)-3-acetoxy-2-hydroxy-propyl] 2-(trimethylammonio)ethyl phosphate	52906477	OC(COP(=O)(OCC[N+](C)(C)C)[O-])COC(=O)C
(E,3S,6R)-6-[(1R,3aS,4E,7aR)-4-[(2Z)-2-[(5S)-5-hydroxy-2-methylenecyclohexylidene]ethylidene]-7a-methyl-2,3,3a,5,6,7-hexahydro-1H-inden-1-yl]-2,3-dimethyl-4-heptene-2,3-diol	52935763	OC1CCC(=C)C(=CC=C2CCCC3(C2CCC3C(C=CC(C(O)(C)C)(O)C)C)C)C1
3,8-dimethyl-2-nitroso-6,9-dihydroimidazo[4,5-f]quinoxaline	54427194	O=Nc1nc2c(n1C)ccc1c2[nH]c(C)c[nH]1
7-hydroxy-1-methyl-3,4-dihydro-2H-isoquinolin-6-one	54444239	O=C1C=C2CCNC(=C2C=C1O)C
2-amino-3-$l^{1}-selanylpropanoic acid	59937801	NC(C(=O)O)C[Se]
(3R,4R,5R)-2-(7-purino[7,8-b]oxazirin-7-iumyloxy)oxane-3,4,5-triol	60006063	OC1COC(C(C1O)O)O[N+]12OC1=Nc1c2cncn1
(2R)-3-(4-hydroxyphenyl)-2-[[(2R)-3-(1H-imidazol-5-yl)-2-[[(2S)-pyrrolidine-2-carbonyl]amino]propanoyl]amino]propanoic acid	60607957	OC(=O)C(Cc1ccc(cc1)O)NC(=O)C(Cc1cnc[nH]1)NC(=O)C1CCCN1
3-[(Z)-docos-13-enoyl]oxy-4-(trimethylammonio)butanoate	60755835	CCCCCCCCC=CCCCCCCCCCCCC(=O)OC(C[N+](C)(C)C)CC(=O)[O-]
(2R,4R,5S,6S)-2-[3-[(2S,3S,4R,6S)-6-[[(2S,3R,4R,5S,6R)-5-[[(2S,3R,4R,5R,6R)-3-acetamido-4,5-dihydroxy-6-(hydroxymethyl)-2-oxanyl]oxy]-2-[[(2R,3S,4R,5R,6R)-4,5-dihydroxy-2-(hydroxymethyl)-6-[(E)-3-hydroxy-2-(1-oxooctadecylamino)octadec-4-enoxy]-3-oxanyl]oxy]-3-hydroxy-6-(hydroxymethyl)-4-oxanyl]oxy]-3-amino-6-carboxy-4-hydroxy-2-oxanyl]-2,3-dihydroxypropoxy]-5-amino-4-hydroxy-6-(1,2,3-trihydroxypr…	60841051	CCCCCCCCCCCCCC=CC(C(NC(=O)CCCCCCCCCCCCCCCCC)COC1OC(CO)C(C(C1O)O)OC1OC(CO)C(C(C1O)OC1(CC(O)C(C(O1)C(C(COC1(CC(O)C(C(O1)C(C(CO)O)O)N)C(=O)O)O)O)N)C(=O)O)OC1OC(CO)C(C(C1NC(=O)C)O)O)O
5-(4-fluorophenyl)-1-[2-[(2R,4R)-4-hydroxy-6-oxo-2-oxanyl]ethyl]-N,4-diphenyl-2-propan-2-yl-3-pyrrolecarboxamide	61175567	OC1CC(CCn2c(C(C)C)c(c(c2c2ccc(cc2)F)c2ccccc2)C(=O)Nc2ccccc2)OC(=O)C1
(2S)-2-[[(2S)-2-[[(2S)-2-azaniumylpropanoyl]amino]-3-(1H-imidazol-5-yl)propanoyl]amino]propanoate	65901053	O=C(C(Cc1cnc[nH]1)NC(=O)C([NH3+])C)NC(C(=O)[O-])C
2-[[amino-(phosphonatoamino)methylene]-methyl-ammonio]acetate	66195470	[O-]C(=O)C[N+](=C(NP(=O)([O-])[O-])N)C
(2S)-1-[(2S)-2-[[(2S)-2-amino-3-(1H-indol-3-yl)propanoyl]amino]propanoyl]pyrrolidine-2-carboxylic acid	94619029	O=C(C(Cc1c[nH]c2c1cccc2)N)NC(C(=O)N1CCCC1C(=O)O)C
(2S)-2-[[2-[[(2S)-2-amino-3-hydroxy-propanoyl]amino]acetyl]amino]pentanedioic acid	94778972	OCC(C(=O)NCC(=O)NC(C(=O)O)CCC(=O)O)N
(2S)-2-[[(2S)-6-amino-2-[[(2S)-2-amino-3-carboxy-propanoyl]amino]hexanoyl]amino]pentanedioic acid	95088409	NCCCCC(C(=O)NC(C(=O)O)CCC(=O)O)NC(=O)C(CC(=O)O)N
4-[3-[(1E,3E,5Z,8Z,11Z)-tetradeca-1,3,5,8,11-pentaenyl]oxiran-2-yl]butanoic acid	95285114	CCC=CCC=CCC=CC=CC=CC1OC1CCCC(=O)O
1-[[[6-(1,3-benzothiazol-2-ylamino)-4-chloro-2-quinolinyl]-oxomethyl]amino]propyl-ethoxyphosphinic acid	95382183	CN(CC1OCCn2cc(c3c2cccc3)C2=C(c3cn(CC1)c1ccccc31)C(=O)NC2=O)C.Cl
(2S)-2-[[(2S)-2-[[(2S)-2-amino-4-methyl-pentanoyl]amino]propanoyl]amino]-5-guanidino-pentanoic acid	95535834	CC(CC(C(=O)NC(C(=O)NC(C(=O)O)CCCN=C(N)N)C)N)C
2-[[(2S)-2-[[(2S)-2-amino-3-methyl-butanoyl]amino]-5-guanidino-pentanoyl]amino]acetic acid	95947885	OC(=O)CNC(=O)C(NC(=O)C(C(C)C)N)CCCN=C(N)N
(2S)-2-[[(2S)-2-[[(2S)-2-amino-4-methyl-pentanoyl]amino]-4-methyl-pentanoyl]amino]-3-(1H-indol-3-yl)propanoic acid	96042916	CC(CC(C(=O)NC(C(=O)O)Cc1c[nH]c2c1cccc2)NC(=O)C(CC(C)C)N)C
(2S)-2-[[(2S,3S)-2-[[(2S)-2-[[(2S)-1-[(2S,3S)-2-[[(2S)-2,6-diaminohexanoyl]amino]-3-methyl-pentanoyl]pyrrolidine-2-carbonyl]amino]-3-(4-hydroxyphenyl)propanoyl]amino]-3-methyl-pentanoyl]amino]-4-methyl-pentanoic acid	96127188	NCCCCC(C(=O)NC(C(=O)N1CCCC1C(=O)NC(C(=O)NC(C(=O)NC(C(=O)O)CC(C)C)C(CC)C)Cc1ccc(cc1)O)C(CC)C)N
(2S)-2-[[(2S)-2-[[(2S)-2-amino-5-guanidino-pentanoyl]amino]propanoyl]amino]-3-phenyl-propanoic acid	96257516	NC(=NCCCC(C(=O)NC(C(=O)NC(C(=O)O)Cc1ccccc1)C)N)N
2-[[(2R)-2-[[(2S)-2-amino-5-guanidino-pentanoyl]amino]-3-sulfanyl-propanoyl]amino]acetic acid	96418566	SCC(C(=O)NCC(=O)O)NC(=O)C(CCCN=C(N)N)N
(2S)-2-[[(2S)-1-[(2S)-2-amino-3-methyl-butanoyl]pyrrolidine-2-carbonyl]amino]-3-(1H-indol-3-yl)propanoic acid	97968048	OC(=O)C(Cc1c[nH]c2c1cccc2)NC(=O)C1CCCN1C(=O)C(C(C)C)N
(2S)-2-[[(2S)-1-[(2S)-2-amino-4-methyl-pentanoyl]pyrrolidine-2-carbonyl]amino]-5-guanidino-pentanoic acid	98921331	CC(CC(C(=O)N1CCCC1C(=O)NC(C(=O)O)CCCN=C(N)N)N)C
(2S)-2-[[(2S)-2-[[(2S)-2-amino-5-guanidino-pentanoyl]amino]-3-phenyl-propanoyl]amino]-5-guanidino-pentanoic acid	98984759	NC(=NCCCC(C(=O)NC(C(=O)NC(C(=O)O)CCCN=C(N)N)Cc1ccccc1)N)N
(2S)-2-[[(2S)-2-[[(2S)-2,6-diaminohexanoyl]amino]-3-(1H-indol-3-yl)propanoyl]amino]-5-guanidino-pentanoic acid	99761700	NCCCCC(C(=O)NC(C(=O)NC(C(=O)O)CCCN=C(N)N)Cc1c[nH]c2c1cccc2)N
1-methylindoline-3,5,6-triol	100143071	OC1CN(c2c1cc(O)c(c2)O)C
(2S)-2-[[(2S,3R)-2-[[(2S)-2-amino-3-(1H-indol-3-yl)propanoyl]amino]-3-hydroxy-butanoyl]amino]-3-(4-hydroxyphenyl)propanoic acid	100965776	Oc1ccc(cc1)CC(C(=O)O)NC(=O)C(C(O)C)NC(=O)C(Cc1c[nH]c2c1cccc2)N
(2S)-2-[[2-[[(2S,3S)-2-amino-3-methyl-pentanoyl]amino]acetyl]amino]-5-guanidino-pentanoic acid	101130697	CCC(C(C(=O)NCC(=O)NC(C(=O)O)CCCN=C(N)N)N)C
(2S)-2-[[(2S)-6-amino-2-[[(2S)-2-amino-3-methyl-butanoyl]amino]hexanoyl]amino]-3-(4-hydroxyphenyl)propanoic acid	101656786	NCCCCC(C(=O)NC(C(=O)O)Cc1ccc(cc1)O)NC(=O)C(C(C)C)N
(2S)-5-amino-2-[[(2S)-2-[[(2S)-2-amino-3-(1H-imidazol-5-yl)propanoyl]amino]-4-carboxy-butanoyl]amino]-5-oxo-pentanoic acid	101658859	OC(=O)CCC(C(=O)NC(C(=O)O)CCC(=O)N)NC(=O)C(Cc1cnc[nH]1)N
(2S)-2-amino-5-[[(2R)-3-[[5-[(2R)-2-amino-2-carboxyethyl]-2,3-dihydroxyphenyl]thio]-1-(carboxymethylamino)-1-oxopropan-2-yl]amino]-5-oxopentanoic acid	104518411	OC(=O)CNC(=O)C(NC(=O)CCC(C(=O)O)N)CSc1cc(CC(C(=O)O)N)cc(c1O)O
4-[2-amino-3-[[(2S,3R,4S,5S,6R)-3,4,5-trihydroxy-6-(hydroxymethyl)-2-oxanyl]oxy]phenyl]-4-oxobutanoic acid	106974283	OCC1OC(Oc2cccc(c2N)C(=O)CCC(=O)O)C(C(C1O)O)O
(2S,3R)-2-[[(2S)-2-[[(2S)-2-amino-5-guanidino-pentanoyl]amino]propanoyl]amino]-3-hydroxy-butanoic acid	110160471	O=C(C(CCCN=C(N)N)N)NC(C(=O)NC(C(=O)O)C(O)C)C
(2S)-6-amino-2-[[(2S)-2-[[(2S)-2-amino-3-hydroxy-propanoyl]amino]-3-phenyl-propanoyl]amino]hexanoic acid	110914463	NCCCCC(C(=O)O)NC(=O)C(Cc1ccccc1)NC(=O)C(CO)N
(2S)-3-[[(2S,3R,4R,5R,6R)-3-acetamido-6-[[(2R,3R,4R,5S,6R)-3-acetamido-4-hydroxy-6-(hydroxymethyl)-5-[[(2S,3R,4S,5R,6R)-3,4,5-trihydroxy-6-(hydroxymethyl)-2-oxanyl]oxy]-2-oxanyl]oxymethyl]-4,5-dihydroxy-2-oxanyl]oxy]-2-aminopropanoic acid	111338111	OCC1OC(OCC2OC(OCC(C(=O)O)N)C(C(C2O)O)NC(=O)C)C(C(C1OC1OC(CO)C(C(C1O)O)O)O)NC(=O)C
(2S)-2-[[(2S)-2-[[(2S)-2-amino-4-methylsulfanyl-butanoyl]amino]-3-phenyl-propanoyl]amino]-5-guanidino-pentanoic acid	113953132	CSCCC(C(=O)NC(C(=O)NC(C(=O)O)CCCN=C(N)N)Cc1ccccc1)N
(2S)-2-amino-5-[[(1R)-2-(carboxymethylamino)-1-[[2-[2,3-dichloro-4-(2-methylenebutanoyl)phenoxy]acetyl]sulfanylmethyl]-2-oxo-ethyl]amino]-5-oxo-pentanoic acid	114051653	CCC(=C)C(=O)c1ccc(c(c1Cl)Cl)OCC(=O)SCC(C(=O)NCC(=O)O)NC(=O)CCC(C(=O)O)N
(2S)-2-amino-5-[[(2R)-3-[[5-(2-aminoethyl)-2,3-dihydroxyphenyl]thio]-1-(carboxymethylamino)-1-oxopropan-2-yl]amino]-5-oxopentanoic acid	116108473	NCCc1cc(SCC(C(=O)NCC(=O)O)NC(=O)CCC(C(=O)O)N)c(c(c1)O)O
(2S)-2-[[(2S)-2-[[(2S)-2-amino-3-(1H-indol-3-yl)propanoyl]amino]-4-carboxy-butanoyl]amino]-4-methyl-pentanoic acid	117996623	CC(CC(C(=O)O)NC(=O)C(NC(=O)C(Cc1c[nH]c2c1cccc2)N)CCC(=O)O)C
(2S,3S)-2-[[(2S,3R)-2-[[(2S)-2-amino-3-(1H-indol-3-yl)propanoyl]amino]-3-hydroxy-butanoyl]amino]-3-methyl-pentanoic acid	117998555	CCC(C(C(=O)O)NC(=O)C(C(O)C)NC(=O)C(Cc1c[nH]c2c1cccc2)N)C
oxido(oxo)ammonium;chloride	118083761	[O-][NH+]=O.[Cl-]
(2S)-2-[[(2S,3S)-2-[[(2S)-2-amino-3-(1H-indol-3-yl)propanoyl]amino]-3-methyl-pentanoyl]amino]-3-(1H-indol-3-yl)propanoic acid	118118852	CCC(C(C(=O)NC(C(=O)O)Cc1c[nH]c2c1cccc2)NC(=O)C(Cc1c[nH]c2c1cccc2)N)C
(2S)-1-[(2S)-2-[[(2S)-2-amino-5-guanidino-pentanoyl]amino]-4-carboxy-butanoyl]pyrrolidine-2-carboxylic acid	118133486	OC(=O)CCC(C(=O)N1CCCC1C(=O)O)NC(=O)C(CCCN=C(N)N)N
4-(4-benzhydryloxy-1-piperidyl)-1-[4-(2-hydroxy-1,1-dimethyl-ethyl)phenyl]butan-1-one	118158262	OCC(c1ccc(cc1)C(=O)CCCN1CCC(CC1)OC(c1ccccc1)c1ccccc1)(C)C
4H-1,4-benzothiazine	121017214	C1=CNc2c(S1)cccc2
5-guanidino-2-[[1-(pyrrolidine-2-carbonyl)pyrrolidine-2-carbonyl]amino]pentanoic acid	123628313	OC(=O)C(NC(=O)C1CCCN1C(=O)C1CCCN1)CCCN=C(N)N
chloro nitrite	124367375	ClON=O
6-amino-2-[[2-(2-aminopropanoylamino)acetyl]amino]hexanoic acid	125177355	NCCCCC(C(=O)O)NC(=O)CNC(=O)C(N)C
2-[[2-[(2-amino-3-phenyl-propanoyl)amino]-3-(1H-indol-3-yl)propanoyl]amino]-4-methyl-pentanoic acid	125197373	CC(CC(C(=O)O)NC(=O)C(Cc1c[nH]c2c1cccc2)NC(=O)C(Cc1ccccc1)N)C
N-(2-hydroxyethyl)tridecanamide	125525232	CCCCCCCCCCCCC(=O)NCCO
N-(2-hydroxyethyl)pentadecanamide	125525243	CCCCCCCCCCCCCCC(=O)NCCO
N-(2-hydroxyethyl)heptadecanamide	125525254	CCCCCCCCCCCCCCCCC(=O)NCCO
2-[[2-[(2,4-diamino-4-oxo-butanoyl)amino]-3-(4-hydroxyphenyl)propanoyl]amino]-3-hydroxy-butanoic acid	125685147	NC(=O)CC(C(=O)NC(C(=O)NC(C(=O)O)C(O)C)Cc1ccc(cc1)O)N
(12E,15E,18E,21E)-tetracosa-12,15,18,21-tetraenoic acid	125984490	CCC=CCC=CCC=CCC=CCCCCCCCCCCC(=O)O
(2S)-2-[[(2S)-2-acetamido-3-hydroxy-propanoyl]amino]butanedioic acid	126243088	OCC(C(=O)NC(C(=O)O)CC(=O)O)NC(=O)C
[(2E,4E,6E,8E)-3,7-dimethyl-9-(2,6,6-trimethylcyclohexen-1-yl)nona-2,4,6,8-tetraenoyl] hexadecanoate	127426741	CCCCCCCCCCCCCCCC(=O)OC(=O)C=C(C=CC=C(C=CC1=C(C)CCCC1(C)C)C)C
(5Z,8Z,11Z,14Z)-12-hydroxyicosa-5,8,11,14-tetraenoic acid	128164462	CCCCCC=CCC(=CCC=CCC=CCCCC(=O)O)O
2-[[2-[[2-amino-3-(4-hydroxyphenyl)propanoyl]amino]-4-methyl-pentanoyl]amino]-5-guanidino-pentanoic acid	129012904	CC(CC(C(=O)NC(C(=O)O)CCCN=C(N)N)NC(=O)C(Cc1ccc(cc1)O)N)C
[(3S,8S,9S,10R,13R,14S,17R)-17-[(1R)-1,5-dimethylhexyl]-10,13-dimethyl-2,3,4,7,8,9,11,12,14,15,16,17-dodecahydro-1H-cyclopenta[a]phenanthren-3-yl] (Z)-tetracos-5-enoate	131013067	CCCCCCCCCCCCCCCCCCC=CCCCC(=O)OC1CCC2(C(=CCC3C2CCC2(C3CCC2C(CCCC(C)C)C)C)C1)C
(2R)-2,7,8-trimethyl-5-nitro-2-[(4R,8R)-4,8,12-trimethyltridecyl]chroman-6-ol	146503509	CC(CCCC(CCCC(C)C)C)CCCC1(C)CCc2c(O1)c(C)c(c(c2[N+](=O)[O-])O)C
2-[[2-(2-aminopropanoylamino)-5-guanidino-pentanoyl]amino]-3-sulfanyl-propanoic acid	149928287	SCC(C(=O)O)NC(=O)C(NC(=O)C(N)C)CCCN=C(N)N
2-[[4-amino-2-(2-aminopropanoylamino)-4-oxo-butanoyl]amino]-4-methyl-pentanoic acid	149928529	CC(CC(C(=O)O)NC(=O)C(NC(=O)C(N)C)CC(=O)N)C
2-[[6-amino-2-(2-aminopropanoylamino)hexanoyl]amino]-3-hydroxy-butanoic acid	149930289	NCCCCC(C(=O)NC(C(=O)O)C(O)C)NC(=O)C(N)C
2-[2-[(2-amino-5-guanidino-pentanoyl)amino]propanoylamino]propanoic acid	149931818	O=C(C(CCCN=C(N)N)N)NC(C(=O)NC(C(=O)O)C)C
6-amino-2-[[2-[(2-amino-5-guanidino-pentanoyl)amino]-5-guanidino-pentanoyl]amino]hexanoic acid	149932137	NCCCCC(C(=O)O)NC(=O)C(NC(=O)C(CCCN=C(N)N)N)CCCN=C(N)N
2-[[2-[(2-amino-5-guanidino-pentanoyl)amino]-5-guanidino-pentanoyl]amino]-4-methylsulfanyl-butanoic acid	149932148	CSCCC(C(=O)O)NC(=O)C(NC(=O)C(CCCN=C(N)N)N)CCCN=C(N)N
2-[[2-[(2-amino-5-guanidino-pentanoyl)amino]-3-sulfanyl-propanoyl]amino]-3-hydroxy-propanoic acid	149932808	SCC(C(=O)NC(C(=O)O)CO)NC(=O)C(CCCN=C(N)N)N
2-[[2-[(2-amino-5-guanidino-pentanoyl)amino]-4-carboxy-butanoyl]amino]pentanedioic acid	149932918	OC(=O)CCC(C(=O)NC(C(=O)O)CCC(=O)O)NC(=O)C(CCCN=C(N)N)N
2-[[2-[(2-amino-5-guanidino-pentanoyl)amino]-3-(1H-imidazol-5-yl)propanoyl]amino]-3-hydroxy-butanoic acid	149933677	O=C(C(CCCN=C(N)N)N)NC(C(=O)NC(C(=O)O)C(O)C)Cc1cnc[nH]1
2-[[1-(2-amino-5-guanidino-pentanoyl)pyrrolidine-2-carbonyl]amino]-4-methylsulfanyl-butanoic acid	149934821	CSCCC(C(=O)O)NC(=O)C1CCCN1C(=O)C(CCCN=C(N)N)N
2-[[1-(2-amino-5-guanidino-pentanoyl)pyrrolidine-2-carbonyl]amino]-3-hydroxy-butanoic acid	149934854	CC(C(C(=O)O)NC(=O)C1CCCN1C(=O)C(CCCN=C(N)N)N)O
2-[[2-[(2-amino-5-guanidino-pentanoyl)amino]-3-hydroxy-propanoyl]amino]-3-hydroxy-propanoic acid	149935052	OCC(C(=O)NC(C(=O)O)CO)NC(=O)C(CCCN=C(N)N)N
2-[[2-[(2-amino-5-guanidino-pentanoyl)amino]-3-(4-hydroxyphenyl)propanoyl]amino]-3-methyl-butanoic acid	149935723	O=C(C(CCCN=C(N)N)N)NC(C(=O)NC(C(=O)O)C(C)C)Cc1ccc(cc1)O
2-[[2-[(2-amino-5-guanidino-pentanoyl)amino]-3-methyl-butanoyl]amino]-3-sulfanyl-propanoic acid	149935767	SCC(C(=O)O)NC(=O)C(C(C)C)NC(=O)C(CCCN=C(N)N)N
2-[[2-[(2-amino-5-guanidino-pentanoyl)amino]-3-methyl-butanoyl]amino]-3-(1H-indol-3-yl)propanoic acid	149935899	CC(C(C(=O)NC(C(=O)O)Cc1c[nH]c2c1cccc2)NC(=O)C(CCCN=C(N)N)N)C
2-[[4-amino-2-[(2,4-diamino-4-oxo-butanoyl)amino]-4-oxo-butanoyl]amino]-5-guanidino-pentanoic acid	149936361	NC(=O)CC(C(=O)NC(C(=O)O)CCCN=C(N)N)NC(=O)C(CC(=O)N)N
2-[[2-[(2,4-diamino-4-oxo-butanoyl)amino]-3-sulfanyl-propanoyl]amino]-3-sulfanyl-propanoic acid	149936823	SCC(C(=O)NC(C(=O)O)CS)NC(=O)C(CC(=O)N)N
1-[2-[(2,4-diamino-4-oxo-butanoyl)amino]-4-methylsulfanyl-butanoyl]pyrrolidine-2-carboxylic acid	149938682	CSCCC(C(=O)N1CCCC1C(=O)O)NC(=O)C(CC(=O)N)N
2-[[2-[(2,4-diamino-4-oxo-butanoyl)amino]-3-phenyl-propanoyl]amino]butanedioic acid	149938781	NC(=O)CC(C(=O)NC(C(=O)NC(C(=O)O)CC(=O)O)Cc1ccccc1)N
2-[[2-[(2,4-diamino-4-oxo-butanoyl)amino]-3-phenyl-propanoyl]amino]-3-sulfanyl-propanoic acid	149938792	SCC(C(=O)O)NC(=O)C(NC(=O)C(CC(=O)N)N)Cc1ccccc1
2-[[2-[(2,4-diamino-4-oxo-butanoyl)amino]-3-(4-hydroxyphenyl)propanoyl]amino]acetic acid	149939892	NC(C(=O)NC(C(=O)NCC(=O)O)Cc1ccc(cc1)O)CC(=O)N
2-[[2-[(2,4-diamino-4-oxo-butanoyl)amino]-3-(4-hydroxyphenyl)propanoyl]amino]-3-phenyl-propanoic acid	149939958	NC(=O)CC(C(=O)NC(C(=O)NC(C(=O)O)Cc1ccccc1)Cc1ccc(cc1)O)N
2-[2-[(2-amino-3-carboxy-propanoyl)amino]propanoylamino]-5-guanidino-pentanoic acid	149940255	OC(=O)CC(C(=O)NC(C(=O)NC(C(=O)O)CCCN=C(N)N)C)N
2-[[4-amino-2-[(2-amino-3-carboxy-propanoyl)amino]-4-oxo-butanoyl]amino]pentanedioic acid	149940717	OC(=O)CCC(C(=O)O)NC(=O)C(NC(=O)C(CC(=O)O)N)CC(=O)N
1-[2-[(2-amino-3-carboxy-propanoyl)amino]-4-carboxy-butanoyl]pyrrolidine-2-carboxylic acid	149941432	OC(=O)CCC(C(=O)N1CCCC1C(=O)O)NC(=O)C(CC(=O)O)N
4-[(2-amino-3-carboxy-propanoyl)amino]-5-[[1-carboxy-2-(1H-indol-3-yl)ethyl]amino]-5-oxo-pentanoic acid	149941465	OC(=O)CCC(C(=O)NC(C(=O)O)Cc1c[nH]c2c1cccc2)NC(=O)C(CC(=O)O)N
3-amino-4-[[1-[(1-carboxy-2-mercaptoethyl)amino]-3-(1H-imidazol-5-yl)-1-oxopropan-2-yl]amino]-4-oxobutanoic acid	149941960	SCC(C(=O)O)NC(=O)C(NC(=O)C(CC(=O)O)N)Cc1[nH]cnc1
1-[2-[(2-amino-3-carboxy-propanoyl)amino]-3-(1H-imidazol-5-yl)propanoyl]pyrrolidine-2-carboxylic acid	149942070	OC(=O)CC(C(=O)NC(C(=O)N1CCCC1C(=O)O)Cc1[nH]cnc1)N
3-amino-4-[[5-amino-1-[[1-carboxy-2-(1H-imidazol-5-yl)ethyl]carbamoyl]pentyl]amino]-4-oxo-butanoic acid	149942653	NCCCCC(C(=O)NC(C(=O)O)Cc1cnc[nH]1)NC(=O)C(CC(=O)O)N
2-[[2-[(2-amino-3-carboxy-propanoyl)amino]-4-methylsulfanyl-butanoyl]amino]butanedioic acid	149942796	CSCCC(C(=O)NC(C(=O)O)CC(=O)O)NC(=O)C(CC(=O)O)N
6-amino-2-[[1-(2-amino-3-carboxy-propanoyl)pyrrolidine-2-carbonyl]amino]hexanoic acid	149943302	NCCCCC(C(=O)O)NC(=O)C1CCCN1C(=O)C(CC(=O)O)N
3-amino-4-[[1-[(3-amino-1-carboxy-3-oxo-propyl)carbamoyl]-2-methyl-propyl]amino]-4-oxo-butanoic acid	149944270	NC(=O)CC(C(=O)O)NC(=O)C(C(C)C)NC(=O)C(CC(=O)O)N
2-[[4-amino-2-[(2-amino-3-mercapto-1-oxopropyl)amino]-1,4-dioxobutyl]amino]-4-(methylthio)butanoic acid	149945018	CSCCC(C(=O)O)NC(=O)C(NC(=O)C(CS)N)CC(=O)N
3-[(2-amino-3-sulfanyl-propanoyl)amino]-4-[(1-carboxy-2-phenyl-ethyl)amino]-4-oxo-butanoic acid	149945249	SCC(C(=O)NC(C(=O)NC(C(=O)O)Cc1ccccc1)CC(=O)O)N
4-[(2-amino-3-sulfanyl-propanoyl)amino]-5-[[1-carboxy-2-(1H-imidazol-5-yl)ethyl]amino]-5-oxo-pentanoic acid	149945623	SCC(C(=O)NC(C(=O)NC(C(=O)O)Cc1[nH]cnc1)CCC(=O)O)N
4-[(2-amino-3-sulfanyl-propanoyl)amino]-5-[[1-carboxy-2-(1H-indol-3-yl)ethyl]amino]-5-oxo-pentanoic acid	149945722	SCC(C(=O)NC(C(=O)NC(C(=O)O)Cc1c[nH]c2c1cccc2)CCC(=O)O)N
2-[[5-amino-2-[(2-amino-3-mercapto-1-oxopropyl)amino]-1,5-dioxopentyl]amino]-4-(methylthio)butanoic acid	149945887	CSCCC(C(=O)O)NC(=O)C(NC(=O)C(CS)N)CCC(=O)N
2-[[2-[(2-amino-3-sulfanyl-propanoyl)amino]-4-methyl-pentanoyl]amino]-3-hydroxy-butanoic acid	149946767	SCC(C(=O)NC(C(=O)NC(C(=O)O)C(O)C)CC(C)C)N
2-[[2-[(2-amino-3-sulfanyl-propanoyl)amino]-3-hydroxy-propanoyl]amino]-4-methylsulfanyl-butanoic acid	149947790	CSCCC(C(=O)O)NC(=O)C(NC(=O)C(CS)N)CO
4-amino-2-[[2-[(2-amino-3-sulfanyl-propanoyl)amino]-3-(4-hydroxyphenyl)propanoyl]amino]-4-oxo-butanoic acid	149948329	SCC(C(=O)NC(C(=O)NC(C(=O)O)CC(=O)N)Cc1ccc(cc1)O)N
2-[[2-[(2-amino-4-carboxy-butanoyl)amino]-5-guanidino-pentanoyl]amino]-4-methyl-pentanoic acid	149949033	CC(CC(C(=O)O)NC(=O)C(NC(=O)C(CCC(=O)O)N)CCCN=C(N)N)C
6-amino-2-[[2-[(2-amino-4-carboxy-butanoyl)amino]-3-methyl-pentanoyl]amino]hexanoic acid	149950650	NCCCCC(C(=O)O)NC(=O)C(C(CC)C)NC(=O)C(CCC(=O)O)N
4-amino-5-[[1-[[1-carboxy-2-(1H-imidazol-5-yl)ethyl]carbamoyl]-3-methylsulfanyl-propyl]amino]-5-oxo-pentanoic acid	149951255	CSCCC(C(=O)NC(C(=O)O)Cc1cnc[nH]1)NC(=O)C(CCC(=O)O)N
6-amino-2-[[2-[(2-amino-4-carboxy-butanoyl)amino]-3-hydroxy-butanoyl]amino]hexanoic acid	149952135	NCCCCC(C(=O)O)NC(=O)C(C(O)C)NC(=O)C(CCC(=O)O)N
4-amino-5-[[1-(1-carboxyethylamino)-3-(1H-indol-3-yl)-1-oxopropan-2-yl]amino]-5-oxopentanoic acid	149952223	OC(=O)CCC(C(=O)NC(C(=O)NC(C(=O)O)C)Cc1c[nH]c2c1cccc2)N
5-amino-2-[[4-amino-2-[(2,5-diamino-1,5-dioxopentyl)amino]-1,4-dioxobutyl]amino]-5-oxopentanoic acid	149953268	NC(=O)CCC(C(=O)NC(C(=O)NC(C(=O)O)CCC(=O)N)CC(=O)N)N
2-[[2-[(2,5-diamino-5-oxo-pentanoyl)amino]-3-(1H-imidazol-5-yl)propanoyl]amino]-3-(1H-imidazol-5-yl)propanoic acid	149954599	NC(=O)CCC(C(=O)NC(C(=O)NC(C(=O)O)Cc1cnc[nH]1)Cc1cnc[nH]1)N
6-amino-2-[[2-[(2,5-diamino-5-oxo-pentanoyl)amino]-3-(1H-imidazol-5-yl)propanoyl]amino]hexanoic acid	149954632	NCCCCC(C(=O)O)NC(=O)C(Cc1cnc[nH]1)NC(=O)C(CCC(=O)N)N
6-amino-2-[[6-amino-2-[(2,5-diamino-5-oxo-pentanoyl)amino]hexanoyl]amino]hexanoic acid	149955292	NCCCCC(C(=O)NC(C(=O)O)CCCCN)NC(=O)C(CCC(=O)N)N
2-[[6-amino-2-[(2,5-diamino-5-oxo-pentanoyl)amino]hexanoyl]amino]-3-(1H-indol-3-yl)propanoic acid	149955358	NCCCCC(C(=O)NC(C(=O)O)Cc1c[nH]c2c1cccc2)NC(=O)C(CCC(=O)N)N
2-[[1-(2,5-diamino-5-oxo-pentanoyl)pyrrolidine-2-carbonyl]amino]pentanedioic acid	149955864	NC(=O)CCC(C(=O)N1CCCC1C(=O)NC(C(=O)O)CCC(=O)O)N
2-[[2-[(2,5-diamino-5-oxo-pentanoyl)amino]-3-(1H-indol-3-yl)propanoyl]amino]pentanedioic acid	149956502	NC(=O)CCC(C(=O)NC(C(=O)NC(C(=O)O)CCC(=O)O)Cc1c[nH]c2c1cccc2)N
2-[[2-[(2,5-diamino-5-oxo-pentanoyl)amino]-3-(4-hydroxyphenyl)propanoyl]amino]-4-methyl-pentanoic acid	149956777	CC(CC(C(=O)O)NC(=O)C(NC(=O)C(CCC(=O)N)N)Cc1ccc(cc1)O)C
4-amino-2-[[2-[(2-aminoacetyl)amino]-3-(1H-imidazol-5-yl)propanoyl]amino]-4-oxo-butanoic acid	149958548	NCC(=O)NC(C(=O)NC(C(=O)O)CC(=O)N)Cc1[nH]cnc1
2-[[6-amino-2-[(2-aminoacetyl)amino]hexanoyl]amino]-3-sulfanyl-propanoic acid	149959065	NCCCCC(C(=O)NC(C(=O)O)CS)NC(=O)CN
2-[[6-amino-2-[(2-aminoacetyl)amino]hexanoyl]amino]-3-phenyl-propanoic acid	149959131	NCCCCC(C(=O)NC(C(=O)O)Cc1ccccc1)NC(=O)CN
2-[[2-[(2-aminoacetyl)amino]-3-methyl-butanoyl]amino]-3-(1H-imidazol-5-yl)propanoic acid	149960506	NCC(=O)NC(C(=O)NC(C(=O)O)Cc1cnc[nH]1)C(C)C
2-[[2-[[2-amino-3-(1H-imidazol-5-yl)propanoyl]amino]-5-guanidino-pentanoyl]amino]-3-sulfanyl-propanoic acid	149960891	SCC(C(=O)O)NC(=O)C(NC(=O)C(Cc1[nH]cnc1)N)CCCN=C(N)N
2-[[2-[[2-amino-3-(1H-imidazol-5-yl)propanoyl]amino]-5-guanidino-pentanoyl]amino]-3-hydroxy-propanoic acid	149961012	OCC(C(=O)O)NC(=O)C(NC(=O)C(Cc1[nH]cnc1)N)CCCN=C(N)N
2-[[2-[[2-amino-3-(1H-imidazol-5-yl)propanoyl]amino]-3-sulfanyl-propanoyl]amino]-3-sulfanyl-propanoic acid	149961551	NC(C(=O)NC(C(=O)NC(C(=O)O)CS)CS)Cc1cnc[nH]1
2-[[5-amino-2-[[2-amino-3-(1H-imidazol-5-yl)propanoyl]amino]-5-oxo-pentanoyl]amino]propanoic acid	149961947	NC(=O)CCC(C(=O)NC(C(=O)O)C)NC(=O)C(Cc1cnc[nH]1)N
6-amino-2-[[2-[[2-amino-3-(1H-imidazol-5-yl)propanoyl]amino]-3-(1H-imidazol-5-yl)propanoyl]amino]hexanoic acid	149962475	NCCCCC(C(=O)O)NC(=O)C(Cc1cnc[nH]1)NC(=O)C(Cc1cnc[nH]1)N
2-[[6-amino-2-[[2-amino-3-(1H-imidazol-5-yl)propanoyl]amino]hexanoyl]amino]propanoic acid	149963003	NCCCCC(C(=O)NC(C(=O)O)C)NC(=O)C(Cc1cnc[nH]1)N
2-[[6-amino-2-[[2-amino-3-(1H-imidazol-5-yl)propanoyl]amino]hexanoyl]amino]pentanedioic acid	149963058	NCCCCC(C(=O)NC(C(=O)O)CCC(=O)O)NC(=O)C(Cc1cnc[nH]1)N
2-[[6-amino-2-[[2-amino-3-(1H-imidazol-5-yl)propanoyl]amino]hexanoyl]amino]-3-methyl-pentanoic acid	149963080	NCCCCC(C(=O)NC(C(CC)C)C(=O)O)NC(=O)C(Cc1[nH]cnc1)N
6-amino-2-[[6-amino-2-[[2-amino-3-(1H-imidazol-5-yl)propanoyl]amino]hexanoyl]amino]hexanoic acid	149963102	NCCCCC(C(=O)NC(C(=O)O)CCCCN)NC(=O)C(Cc1cnc[nH]1)N
2-[[6-amino-2-[[2-amino-3-(1H-imidazol-5-yl)propanoyl]amino]hexanoyl]amino]-3-hydroxy-butanoic acid	149963157	NCCCCC(C(=O)NC(C(=O)O)C(O)C)NC(=O)C(Cc1cnc[nH]1)N
2-[[6-amino-2-[[2-amino-3-(1H-imidazol-5-yl)propanoyl]amino]hexanoyl]amino]-3-methyl-butanoic acid	149963190	NCCCCC(C(=O)NC(C(=O)O)C(C)C)NC(=O)C(Cc1cnc[nH]1)N
5-amino-2-[[2-[[2-amino-3-(1H-imidazol-5-yl)propanoyl]amino]-4-methylsulfanyl-butanoyl]amino]-5-oxo-pentanoic acid	149963267	CSCCC(C(=O)NC(C(=O)O)CCC(=O)N)NC(=O)C(Cc1cnc[nH]1)N
2-[[2-[[2-amino-3-(1H-imidazol-5-yl)propanoyl]amino]-3-phenyl-propanoyl]amino]-5-guanidino-pentanoic acid	149963432	NC(=NCCCC(C(=O)O)NC(=O)C(NC(=O)C(Cc1[nH]cnc1)N)Cc1ccccc1)N
6-amino-2-[[1-[2-amino-3-(1H-imidazol-5-yl)propanoyl]pyrrolidine-2-carbonyl]amino]hexanoic acid	149963751	NCCCCC(C(=O)O)NC(=O)C1CCCN1C(=O)C(Cc1cnc[nH]1)N
2-[[2-[[2-amino-3-(1H-imidazol-5-yl)propanoyl]amino]-3-(1H-indol-3-yl)propanoyl]amino]-3-(1H-imidazol-5-yl)propanoic acid	149964367	O=C(C(Cc1c[nH]c2c1cccc2)NC(=O)C(Cc1cnc[nH]1)N)NC(C(=O)O)Cc1cnc[nH]1
2-[[2-[(2-amino-3-methyl-pentanoyl)amino]-5-guanidino-pentanoyl]amino]-3-methyl-pentanoic acid	149965170	CCC(C(C(=O)NC(C(=O)NC(C(CC)C)C(=O)O)CCCN=C(N)N)N)C
2-[[4-amino-2-[(2-amino-3-methyl-pentanoyl)amino]-4-oxo-butanoyl]amino]-3-(1H-imidazol-5-yl)propanoic acid	149965379	CCC(C(C(=O)NC(C(=O)NC(C(=O)O)Cc1[nH]cnc1)CC(=O)N)N)C
2-[[5-amino-2-[(2-amino-3-methyl-pentanoyl)amino]-5-oxo-pentanoyl]amino]pentanedioic acid	149966204	CCC(C(C(=O)NC(C(=O)NC(C(=O)O)CCC(=O)O)CCC(=O)N)N)C
6-amino-2-[[1-(2-amino-3-methyl-pentanoyl)pyrrolidine-2-carbonyl]amino]hexanoic acid	149967898	NCCCCC(C(=O)O)NC(=O)C1CCCN1C(=O)C(C(CC)C)N
2-[[2-[(2-amino-3-methyl-pentanoyl)amino]-3-hydroxy-propanoyl]amino]-5-guanidino-pentanoic acid	149967986	OCC(C(=O)NC(C(=O)O)CCCN=C(N)N)NC(=O)C(C(CC)C)N
2-[[2-[(2-amino-3-methyl-pentanoyl)amino]-3-(1H-indol-3-yl)propanoyl]amino]-3-(4-hydroxyphenyl)propanoic acid	149968591	CCC(C(C(=O)NC(C(=O)NC(C(=O)O)Cc1ccc(cc1)O)Cc1c[nH]c2c1cccc2)N)C
2-[[4-amino-2-[(2-amino-4-methyl-pentanoyl)amino]-4-oxo-butanoyl]amino]butanedioic acid	149969405	CC(CC(C(=O)NC(C(=O)NC(C(=O)O)CC(=O)O)CC(=O)N)N)C
6-amino-2-[[2-[(2-amino-4-methyl-pentanoyl)amino]-3-carboxy-propanoyl]amino]hexanoic acid	149969702	NCCCCC(C(=O)O)NC(=O)C(NC(=O)C(CC(C)C)N)CC(=O)O
2-[[2-[(2-amino-4-methyl-pentanoyl)amino]-3-hydroxy-propanoyl]amino]-3-(1H-indol-3-yl)propanoic acid	149972056	OCC(C(=O)NC(C(=O)O)Cc1c[nH]c2c1cccc2)NC(=O)C(CC(C)C)N
2-[[2-[(2-amino-4-methyl-pentanoyl)amino]-3-(1H-indol-3-yl)propanoyl]amino]-5-guanidino-pentanoic acid	149972287	CC(CC(C(=O)NC(C(=O)NC(C(=O)O)CCCN=C(N)N)Cc1c[nH]c2c1cccc2)N)C
2-[[2-[(2-amino-4-methyl-pentanoyl)amino]-3-(4-hydroxyphenyl)propanoyl]amino]-3-(4-hydroxyphenyl)propanoic acid	149972650	Oc1ccc(cc1)CC(C(=O)NC(C(=O)O)Cc1ccc(cc1)O)NC(=O)C(CC(C)C)N
2-[[2-(2,6-diaminohexanoylamino)-5-guanidino-pentanoyl]amino]-4-methyl-pentanoic acid	149973145	NCCCCC(C(=O)NC(C(=O)NC(C(=O)O)CC(C)C)CCCN=C(N)N)N
2-[[2-(2,6-diaminohexanoylamino)-3-sulfanyl-propanoyl]amino]-3-(1H-imidazol-5-yl)propanoic acid	149973739	NCCCCC(C(=O)NC(C(=O)NC(C(=O)O)Cc1[nH]cnc1)CS)N
2-[[5-amino-2-(2,6-diaminohexanoylamino)-5-oxo-pentanoyl]amino]-3-phenyl-propanoic acid	149974179	NCCCCC(C(=O)NC(C(=O)NC(C(=O)O)Cc1ccccc1)CCC(=O)N)N
2-[[2-(2,6-diaminohexanoylamino)-3-phenyl-propanoyl]amino]-3-methyl-pentanoic acid	149975466	NCCCCC(C(=O)NC(C(=O)NC(C(CC)C)C(=O)O)Cc1ccccc1)N
2-[[2-(2,6-diaminohexanoylamino)-3-(4-hydroxyphenyl)propanoyl]amino]-3-methyl-pentanoic acid	149976357	NCCCCC(C(=O)NC(C(=O)NC(C(CC)C)C(=O)O)Cc1ccc(cc1)O)N
2-[[2-(2,6-diaminohexanoylamino)-3-methyl-butanoyl]amino]-3-phenyl-propanoic acid	149976588	NCCCCC(C(=O)NC(C(=O)NC(C(=O)O)Cc1ccccc1)C(C)C)N
2-[[2-(2,6-diaminohexanoylamino)-3-methyl-butanoyl]amino]-3-(1H-indol-3-yl)propanoic acid	149976632	NCCCCC(C(=O)NC(C(=O)NC(C(=O)O)Cc1c[nH]c2c1cccc2)C(C)C)N
2-[[2-[(2-amino-4-methylsulfanyl-butanoyl)amino]-5-guanidino-pentanoyl]amino]-4-methyl-pentanoic acid	149976973	CSCCC(C(=O)NC(C(=O)NC(C(=O)O)CC(C)C)CCCN=C(N)N)N
2-[[4-amino-2-[(2-amino-4-methylsulfanyl-butanoyl)amino]-4-oxo-butanoyl]amino]-3-(4-hydroxyphenyl)propanoic acid	149977281	CSCCC(C(=O)NC(C(=O)NC(C(=O)O)Cc1ccc(cc1)O)CC(=O)N)N
2-[[5-amino-2-[(2-amino-4-methylsulfanyl-butanoyl)amino]-5-oxo-pentanoyl]amino]-3-(4-hydroxyphenyl)propanoic acid	149978161	CSCCC(C(=O)NC(C(=O)NC(C(=O)O)Cc1ccc(cc1)O)CCC(=O)N)N
2-[[2-[(2-amino-4-methylsulfanyl-butanoyl)amino]acetyl]amino]-5-guanidino-pentanoic acid	149978194	CSCCC(C(=O)NCC(=O)NC(C(=O)O)CCCN=C(N)N)N
6-amino-2-[[2-[(2-amino-4-methylsulfanyl-butanoyl)amino]-3-(1H-imidazol-5-yl)propanoyl]amino]hexanoic acid	149978513	CSCCC(C(=O)NC(C(=O)NC(C(=O)O)CCCCN)Cc1cnc[nH]1)N
2-[[2-[[2-amino-4-(methylthio)-1-oxobutyl]amino]-4-(methylthio)-1-oxobutyl]amino]-3-methylpentanoic acid	149979338	CSCCC(C(=O)NC(C(CC)C)C(=O)O)NC(=O)C(CCSC)N
2-[[2-[(2-amino-4-methylsulfanyl-butanoyl)amino]-3-(1H-indol-3-yl)propanoyl]amino]-3-phenyl-propanoic acid	149980460	CSCCC(C(=O)NC(C(=O)NC(C(=O)O)Cc1ccccc1)Cc1c[nH]c2c1cccc2)N
2-[[4-amino-2-[(2-amino-1-oxo-3-phenylpropyl)amino]-1,4-dioxobutyl]amino]-4-(methylthio)butanoic acid	149981461	CSCCC(C(=O)O)NC(=O)C(NC(=O)C(Cc1ccccc1)N)CC(=O)N
2-[[5-amino-2-[(2-amino-3-phenyl-propanoyl)amino]-5-oxo-pentanoyl]amino]-3-phenyl-propanoic acid	149982297	NC(=O)CCC(C(=O)NC(C(=O)O)Cc1ccccc1)NC(=O)C(Cc1ccccc1)N
2-[[2-[(2-amino-3-phenyl-propanoyl)amino]-4-methyl-pentanoyl]amino]butanedioic acid	149982968	NC(C(=O)NC(C(=O)NC(C(=O)O)CC(=O)O)CC(C)C)Cc1ccccc1
2-[[2-[(2-amino-3-phenyl-propanoyl)amino]-4-methyl-pentanoyl]amino]-3-(1H-imidazol-5-yl)propanoic acid	149983023	CC(CC(C(=O)NC(C(=O)O)Cc1[nH]cnc1)NC(=O)C(Cc1ccccc1)N)C
2-[[6-amino-2-[(2-amino-3-phenyl-propanoyl)amino]hexanoyl]amino]propanoic acid	149983133	NCCCCC(C(=O)NC(C(=O)O)C)NC(=O)C(Cc1ccccc1)N
4-amino-2-[[2-[(2-amino-3-phenyl-propanoyl)amino]-3-phenyl-propanoyl]amino]-4-oxo-butanoic acid	149983540	NC(=O)CC(C(=O)O)NC(=O)C(Cc1ccccc1)NC(=O)C(Cc1ccccc1)N
2-[[2-[(2-amino-3-phenyl-propanoyl)amino]-3-phenyl-propanoyl]amino]-3-hydroxy-butanoic acid	149983661	NC(C(=O)NC(C(=O)NC(C(=O)O)C(O)C)Cc1ccccc1)Cc1ccccc1
2-[[2-[(2-amino-3-phenyl-propanoyl)amino]-3-hydroxy-propanoyl]amino]-3-(1H-indol-3-yl)propanoic acid	149984046	OCC(C(=O)NC(C(=O)O)Cc1c[nH]c2c1cccc2)NC(=O)C(Cc1ccccc1)N
6-amino-2-[[2-[(2-amino-3-phenyl-propanoyl)amino]-3-hydroxy-butanoyl]amino]hexanoic acid	149984200	NCCCCC(C(=O)O)NC(=O)C(C(O)C)NC(=O)C(Cc1ccccc1)N
5-amino-2-[[2-[(2-amino-3-phenyl-propanoyl)amino]-3-(4-hydroxyphenyl)propanoyl]amino]-5-oxo-pentanoic acid	149984563	NC(=O)CCC(C(=O)O)NC(=O)C(NC(=O)C(Cc1ccccc1)N)Cc1ccc(cc1)O
6-amino-2-[[2-[(2-amino-3-phenyl-propanoyl)amino]-3-(4-hydroxyphenyl)propanoyl]amino]hexanoic acid	149984618	NCCCCC(C(=O)O)NC(=O)C(Cc1ccc(cc1)O)NC(=O)C(Cc1ccccc1)N
2-[[5-guanidino-2-(pyrrolidine-2-carbonylamino)pentanoyl]amino]butanedioic acid	149985102	OC(=O)CC(C(=O)O)NC(=O)C(NC(=O)C1CCCN1)CCCN=C(N)N
2-[[5-guanidino-2-(pyrrolidine-2-carbonylamino)pentanoyl]amino]-3-sulfanyl-propanoic acid	149985113	SCC(C(=O)O)NC(=O)C(NC(=O)C1CCCN1)CCCN=C(N)N
2-[[4-amino-4-oxo-2-(pyrrolidine-2-carbonylamino)butanoyl]amino]-3-sulfanyl-propanoic acid	149985311	SCC(C(=O)O)NC(=O)C(NC(=O)C1CCCN1)CC(=O)N
6-amino-2-[[4-carboxy-2-(pyrrolidine-2-carbonylamino)butanoyl]amino]hexanoic acid	149986048	NCCCCC(C(=O)O)NC(=O)C(NC(=O)C1CCCN1)CCC(=O)O
1-[5-amino-5-oxo-2-(pyrrolidine-2-carbonylamino)pentanoyl]pyrrolidine-2-carboxylic acid	149986268	NC(=O)CCC(C(=O)N1CCCC1C(=O)O)NC(=O)C1CCCN1
5-guanidino-2-[[4-methyl-2-(pyrrolidine-2-carbonylamino)pentanoyl]amino]pentanoic acid	149986906	CC(CC(C(=O)NC(C(=O)O)CCCN=C(N)N)NC(=O)C1CCCN1)C
6-amino-2-[[3-(1H-indol-3-yl)-2-(pyrrolidine-2-carbonylamino)propanoyl]amino]hexanoic acid	149988391	NCCCCC(C(=O)O)NC(=O)C(Cc1c[nH]c2c1cccc2)NC(=O)C1CCCN1
3-hydroxy-2-[[3-(1H-indol-3-yl)-2-(pyrrolidine-2-carbonylamino)propanoyl]amino]butanoic acid	149988446	O=C(C(Cc1c[nH]c2c1cccc2)NC(=O)C1CCCN1)NC(C(=O)O)C(O)C
5-amino-2-[[3-methyl-2-(pyrrolidine-2-carbonylamino)butanoyl]amino]-5-oxo-pentanoic acid	149988754	NC(=O)CCC(C(=O)O)NC(=O)C(C(C)C)NC(=O)C1CCCN1
2-[[2-[(2-amino-3-hydroxy-propanoyl)amino]-5-guanidino-pentanoyl]amino]propanoic acid	149989128	OCC(C(=O)NC(C(=O)NC(C(=O)O)C)CCCN=C(N)N)N
2-[[2-[(2-amino-3-hydroxy-propanoyl)amino]-5-guanidino-pentanoyl]amino]-3-(1H-indol-3-yl)propanoic acid	149989315	OCC(C(=O)NC(C(=O)NC(C(=O)O)Cc1c[nH]c2c1cccc2)CCCN=C(N)N)N
2-[[2-[(2-amino-3-hydroxy-propanoyl)amino]-3-sulfanyl-propanoyl]amino]-5-guanidino-pentanoic acid	149989755	SCC(C(=O)NC(C(=O)O)CCCN=C(N)N)NC(=O)C(CO)N
2-[[6-amino-2-[(2-amino-3-hydroxy-propanoyl)amino]hexanoyl]amino]-3-(1H-imidazol-5-yl)propanoic acid	149991295	NCCCCC(C(=O)NC(C(=O)O)Cc1[nH]cnc1)NC(=O)C(CO)N
2-[[2-[(2-amino-3-hydroxy-propanoyl)amino]-3-(1H-indol-3-yl)propanoyl]amino]-3-(1H-imidazol-5-yl)propanoic acid	149992604	OCC(C(=O)NC(C(=O)NC(C(=O)O)Cc1cnc[nH]1)Cc1c[nH]c2c1cccc2)N
2-[[2-[(2-amino-3-hydroxy-butanoyl)amino]-5-guanidino-pentanoyl]amino]-3-(4-hydroxyphenyl)propanoic acid	149993572	O=C(C(NC(=O)C(C(O)C)N)CCCN=C(N)N)NC(C(=O)O)Cc1ccc(cc1)O
2-[[4-amino-2-[(2-amino-3-hydroxy-butanoyl)amino]-4-oxo-butanoyl]amino]-3-(4-hydroxyphenyl)propanoic acid	149993792	NC(=O)CC(C(=O)NC(C(=O)O)Cc1ccc(cc1)O)NC(=O)C(C(O)C)N
2-[[5-amino-2-[(2-amino-3-hydroxy-butanoyl)amino]-5-oxo-pentanoyl]amino]pentanedioic acid	149994496	NC(=O)CCC(C(=O)NC(C(=O)O)CCC(=O)O)NC(=O)C(C(O)C)N
2-[[5-amino-2-[(2-amino-3-hydroxy-butanoyl)amino]-5-oxo-pentanoyl]amino]-3-(4-hydroxyphenyl)propanoic acid	149994639	NC(=O)CCC(C(=O)NC(C(=O)O)Cc1ccc(cc1)O)NC(=O)C(C(O)C)N
2-[[2-[(2-amino-3-hydroxy-butanoyl)amino]-3-(1H-imidazol-5-yl)propanoyl]amino]-3-(1H-imidazol-5-yl)propanoic acid	149994958	NC(C(=O)NC(C(=O)NC(C(=O)O)Cc1[nH]cnc1)Cc1[nH]cnc1)C(O)C
2-[[2-[(2-amino-3-hydroxy-butanoyl)amino]-3-methyl-pentanoyl]amino]-5-guanidino-pentanoic acid	149995090	CCC(C(C(=O)NC(C(=O)O)CCCN=C(N)N)NC(=O)C(C(O)C)N)C
2-[[2-[(2-amino-3-hydroxy-butanoyl)amino]-4-methylsulfanyl-butanoyl]amino]-5-guanidino-pentanoic acid	149995717	CSCCC(C(=O)NC(C(=O)O)CCCN=C(N)N)NC(=O)C(C(O)C)N
2-[[2-[(2-amino-3-hydroxy-butanoyl)amino]-3-phenyl-propanoyl]amino]-5-guanidino-pentanoic acid	149995937	OC(=O)C(NC(=O)C(Cc1ccccc1)NC(=O)C(C(O)C)N)CCCN=C(N)N
2-[[2-[(2-amino-3-hydroxy-butanoyl)amino]-3-hydroxy-propanoyl]amino]-5-guanidino-pentanoic acid	149996366	OCC(C(=O)NC(C(=O)O)CCCN=C(N)N)NC(=O)C(C(O)C)N
2-[[2-[(2-amino-3-hydroxy-butanoyl)amino]-3-(4-hydroxyphenyl)propanoyl]amino]-4-methylsulfanyl-butanoic acid	149997103	CSCCC(C(=O)O)NC(=O)C(Cc1ccc(cc1)O)NC(=O)C(C(O)C)N
2-[[2-[[2-amino-3-(1H-indol-3-yl)propanoyl]amino]-5-guanidino-pentanoyl]amino]propanoic acid	149997565	O=C(C(Cc1c[nH]c2c1cccc2)N)NC(C(=O)NC(C(=O)O)C)CCCN=C(N)N
2-[[2-[[2-amino-3-(1H-indol-3-yl)propanoyl]amino]-3-carboxy-propanoyl]amino]butanedioic acid	150073493	OC(=O)CC(C(=O)NC(C(=O)O)CC(=O)O)NC(=O)C(Cc1c[nH]c2c1cccc2)N
1-[2-[[2-amino-3-(1H-indol-3-yl)propanoyl]amino]-4-carboxy-butanoyl]pyrrolidine-2-carboxylic acid	150074043	OC(=O)CCC(C(=O)N1CCCC1C(=O)O)NC(=O)C(Cc1c[nH]c2c1cccc2)N
4-[[2-amino-3-(1H-indol-3-yl)propanoyl]amino]-5-[[1-carboxy-2-(4-hydroxyphenyl)ethyl]amino]-5-oxo-pentanoic acid	150074076	OC(=O)CCC(C(=O)NC(C(=O)O)Cc1ccc(cc1)O)NC(=O)C(Cc1c[nH]c2c1cccc2)N
5-amino-2-[[5-amino-2-[[2-amino-3-(1H-indol-3-yl)propanoyl]amino]-5-oxo-pentanoyl]amino]-5-oxo-pentanoic acid	150074164	NC(=O)CCC(C(=O)NC(C(=O)O)CCC(=O)N)NC(=O)C(Cc1c[nH]c2c1cccc2)N
2-[[2-[[2-amino-3-(1H-indol-3-yl)propanoyl]amino]acetyl]amino]butanedioic acid	150074340	O=C(NC(C(=O)O)CC(=O)O)CNC(=O)C(Cc1c[nH]c2c1cccc2)N
2-[[2-[[2-amino-3-(1H-indol-3-yl)propanoyl]amino]acetyl]amino]-4-methyl-pentanoic acid	150074406	CC(CC(C(=O)O)NC(=O)CNC(=O)C(Cc1c[nH]c2c1cccc2)N)C
2-[[2-[[2-amino-3-(1H-indol-3-yl)propanoyl]amino]acetyl]amino]-3-phenyl-propanoic acid	150074439	O=C(NC(C(=O)O)Cc1ccccc1)CNC(=O)C(Cc1c[nH]c2c1cccc2)N
2-[[2-[[2-amino-3-(1H-indol-3-yl)propanoyl]amino]acetyl]amino]-3-methyl-butanoic acid	150074494	O=C(NC(C(=O)O)C(C)C)CNC(=O)C(Cc1c[nH]c2c1cccc2)N
2-[[2-[[2-amino-3-(1H-indol-3-yl)propanoyl]amino]-3-(1H-imidazol-5-yl)propanoyl]amino]-4-methylsulfanyl-butanoic acid	150074637	CSCCC(C(=O)O)NC(=O)C(Cc1cnc[nH]1)NC(=O)C(Cc1c[nH]c2c1cccc2)N
6-amino-2-[[2-[[2-amino-3-(1H-indol-3-yl)propanoyl]amino]-3-methyl-pentanoyl]amino]hexanoic acid	150074835	NCCCCC(C(=O)O)NC(=O)C(C(CC)C)NC(=O)C(Cc1c[nH]c2c1cccc2)N
2-[[2-[[2-amino-3-(1H-indol-3-yl)propanoyl]amino]-4-methyl-pentanoyl]amino]-3-methyl-butanoic acid	150075143	CC(CC(C(=O)NC(C(=O)O)C(C)C)NC(=O)C(Cc1c[nH]c2c1cccc2)N)C
2-[[2-[[2-amino-3-(1H-indol-3-yl)propanoyl]amino]-4-methylsulfanyl-butanoyl]amino]-5-guanidino-pentanoic acid	150075385	CSCCC(C(=O)NC(C(=O)O)CCCN=C(N)N)NC(=O)C(Cc1c[nH]c2c1cccc2)N
2-[[2-[[2-amino-3-(1H-indol-3-yl)propanoyl]amino]-4-methylsulfanyl-butanoyl]amino]-3-methyl-butanoic acid	150075583	CSCCC(C(=O)NC(C(=O)O)C(C)C)NC(=O)C(Cc1c[nH]c2c1cccc2)N
2-[[1-[2-amino-3-(1H-indol-3-yl)propanoyl]pyrrolidine-2-carbonyl]amino]acetic acid	150075858	OC(=O)CNC(=O)C1CCCN1C(=O)C(Cc1c[nH]c2c1cccc2)N
2-[[1-[2-amino-3-(1H-indol-3-yl)propanoyl]pyrrolidine-2-carbonyl]amino]-4-methyl-pentanoic acid	150075891	CC(CC(C(=O)O)NC(=O)C1CCCN1C(=O)C(Cc1c[nH]c2c1cccc2)N)C
2-[[1-[2-amino-3-(1H-indol-3-yl)propanoyl]pyrrolidine-2-carbonyl]amino]-3-methyl-butanoic acid	150075990	CC(C(C(=O)O)NC(=O)C1CCCN1C(=O)C(Cc1c[nH]c2c1cccc2)N)C
2-[[2-[[2-amino-3-(1H-indol-3-yl)propanoyl]amino]-3-hydroxy-butanoyl]amino]pentanedioic acid	150076265	OC(=O)CCC(C(=O)O)NC(=O)C(C(O)C)NC(=O)C(Cc1c[nH]c2c1cccc2)N
5-amino-2-[[2-[[2-amino-3-(1H-indol-3-yl)propanoyl]amino]-3-(4-hydroxyphenyl)propanoyl]amino]-5-oxo-pentanoic acid	150076683	NC(=O)CCC(C(=O)O)NC(=O)C(Cc1ccc(cc1)O)NC(=O)C(Cc1c[nH]c2c1cccc2)N
2-[[2-[[2-amino-3-(1H-indol-3-yl)propanoyl]amino]-3-(4-hydroxyphenyl)propanoyl]amino]-3-(4-hydroxyphenyl)propanoic acid	150076815	Oc1ccc(cc1)CC(C(=O)NC(C(=O)O)Cc1ccc(cc1)O)NC(=O)C(Cc1c[nH]c2c1cccc2)N
2-[[2-[[2-amino-3-(1H-indol-3-yl)propanoyl]amino]-3-methyl-butanoyl]amino]butanedioic acid	150076870	OC(=O)CC(C(=O)O)NC(=O)C(C(C)C)NC(=O)C(Cc1c[nH]c2c1cccc2)N
2-[[2-[[2-amino-3-(4-hydroxyphenyl)propanoyl]amino]-5-guanidino-pentanoyl]amino]pentanedioic acid	150077299	OC(=O)CCC(C(=O)O)NC(=O)C(NC(=O)C(Cc1ccc(cc1)O)N)CCCN=C(N)N
2-[[2-[[2-amino-3-(4-hydroxyphenyl)propanoyl]amino]-5-guanidino-pentanoyl]amino]-3-hydroxy-propanoic acid	150077387	OCC(C(=O)O)NC(=O)C(NC(=O)C(Cc1ccc(cc1)O)N)CCCN=C(N)N
2-[[2-[[2-amino-3-(4-hydroxyphenyl)propanoyl]amino]-3-carboxy-propanoyl]amino]-5-guanidino-pentanoic acid	150077662	OC(=O)CC(C(=O)NC(C(=O)O)CCCN=C(N)N)NC(=O)C(Cc1ccc(cc1)O)N
2-[[2-[[2-amino-3-(4-hydroxyphenyl)propanoyl]amino]-3-sulfanyl-propanoyl]amino]acetic acid	150077948	SCC(C(=O)NCC(=O)O)NC(=O)C(Cc1ccc(cc1)O)N
2-[[2-[[2-amino-3-(4-hydroxyphenyl)propanoyl]amino]-3-sulfanyl-propanoyl]amino]-3-hydroxy-butanoic acid	150078047	SCC(C(=O)NC(C(=O)O)C(O)C)NC(=O)C(Cc1ccc(cc1)O)N
2-[[2-[[2-amino-3-(4-hydroxyphenyl)propanoyl]amino]-3-phenyl-propanoyl]amino]-3-(4-hydroxyphenyl)propanoic acid	150079895	Oc1ccc(cc1)CC(C(=O)NC(C(=O)NC(C(=O)O)Cc1ccc(cc1)O)Cc1ccccc1)N
2-[[2-[[2-amino-3-(4-hydroxyphenyl)propanoyl]amino]-3-(1H-indol-3-yl)propanoyl]amino]-3-phenyl-propanoic acid	150080632	Oc1ccc(cc1)CC(C(=O)NC(C(=O)NC(C(=O)O)Cc1ccccc1)Cc1c[nH]c2c1cccc2)N
2-[[2-[[2-amino-3-(4-hydroxyphenyl)propanoyl]amino]-3-methyl-butanoyl]amino]-4-methylsulfanyl-butanoic acid	150081017	CSCCC(C(=O)O)NC(=O)C(C(C)C)NC(=O)C(Cc1ccc(cc1)O)N
4-amino-2-[[2-[(2-amino-3-methyl-butanoyl)amino]-3-(1H-imidazol-5-yl)propanoyl]amino]-4-oxo-butanoic acid	150082788	NC(=O)CC(C(=O)O)NC(=O)C(Cc1cnc[nH]1)NC(=O)C(C(C)C)N
2-[[2-[(2-amino-3-methyl-butanoyl)amino]-4-methyl-pentanoyl]amino]-3-phenyl-propanoic acid	150083316	CC(CC(C(=O)NC(C(=O)O)Cc1ccccc1)NC(=O)C(C(C)C)N)C
2-[[2-[(2-amino-3-methyl-butanoyl)amino]-3-phenyl-propanoyl]amino]-5-guanidino-pentanoic acid	150083822	OC(=O)C(NC(=O)C(Cc1ccccc1)NC(=O)C(C(C)C)N)CCCN=C(N)N
2-[[2-[(2-amino-3-methyl-butanoyl)amino]-3-hydroxy-propanoyl]amino]-5-guanidino-pentanoic acid	150084229	OCC(C(=O)NC(C(=O)O)CCCN=C(N)N)NC(=O)C(C(C)C)N
2-[[2-[(2-amino-3-methyl-butanoyl)amino]-3-(1H-indol-3-yl)propanoyl]amino]-3-phenyl-propanoic acid	150084757	NC(C(=O)NC(C(=O)NC(C(=O)O)Cc1ccccc1)Cc1c[nH]c2c1cccc2)C(C)C
2-[[2-[(2-amino-3-methyl-butanoyl)amino]-3-(1H-indol-3-yl)propanoyl]amino]-3-methyl-butanoic acid	150084823	O=C(C(Cc1c[nH]c2c1cccc2)NC(=O)C(C(C)C)N)NC(C(=O)O)C(C)C
[(2S)-3-hydroxy-2-pentadecanoyloxy-propyl] 2-(trimethylammonio)ethyl phosphate	154176640	CCCCCCCCCCCCCCC(=O)OC(COP(=O)(OCC[N+](C)(C)C)[O-])CO
(3-carboxy-2-hydroxy-4-oxoundecyl)-trimethylammonium	157325275	CCCCCCCC(=O)C(C(C[N+](C)(C)C)O)C(=O)O
2-[[2-[(2-amino-3-hydroxy-butanoyl)amino]-3-hydroxy-butanoyl]amino]-5-guanidino-pentanoic acid	165252325	CC(C(C(=O)NC(C(=O)O)CCCN=C(N)N)NC(=O)C(C(O)C)N)O
1-[6-amino-2-(pyrrolidine-2-carbonylamino)hexanoyl]pyrrolidine-2-carboxylic acid	168971943	NCCCCC(C(=O)N1CCCC1C(=O)O)NC(=O)C1CCCN1
1-[6-amino-2-[(2-amino-3-phenyl-propanoyl)amino]hexanoyl]pyrrolidine-2-carboxylic acid	168971965	NCCCCC(C(=O)N1CCCC1C(=O)O)NC(=O)C(Cc1ccccc1)N
(2S,3S,4S,5R)-6-[5-(2-aminoethyl)-2-hydroxyphenoxy]-3,4,5-trihydroxy-2-oxanecarboxylic acid	178970066	NCCc1ccc(c(c1)OC1OC(C(=O)O)C(C(C1O)O)O)O
2-[[2-[[2-amino-3-(1H-indol-3-yl)propanoyl]amino]-3-hydroxy-propanoyl]amino]-3-(4-hydroxyphenyl)propanoic acid	180394490	OCC(C(=O)NC(C(=O)O)Cc1ccc(cc1)O)NC(=O)C(Cc1c[nH]c2c1cccc2)N
1,2,3-trihydroxyhenicosan-4-one	184460433	CCCCCCCCCCCCCCCCCC(=O)C(C(CO)O)O
5-[(2Z,6E,10E,14E,18E,22E,26E,30E,34E)-3,7,11,15,19,23,27,31,35,39-decamethyltetraconta-2,6,10,14,18,22,26,30,34,38-decaenyl]-4-hydroxy-3-methoxy-6-methyl-1,2-benzoquinone	191260863	COC1=C(O)C(=C(C(=O)C1=O)C)CC=C(CCC=C(CCC=C(CCC=C(CCC=C(CCC=C(CCC=C(CCC=C(CCC=C(CCC=C(C)C)C)C)C)C)C)C)C)C)C
[(2R)-3-[2-aminoethoxy(hydroxy)phosphoryl]oxy-2-hydroxy-propyl] tridecanoate	261003007	CCCCCCCCCCCCC(=O)OCC(COP(=O)(OCCN)O)O
2-[(1S)-1,2-dihydroxyethyl]-4,5-dioxo-3-furanolate	277405517	OCC(C1=C([O-])C(=O)C(=O)O1)O
(3S)-indoline-3,5,6-triol	277895597	OC1CNc2c1cc(O)c(c2)O
S-[2-[3-[[(2R)-4-[[[(2R,3R,5R)-5-(6-aminopurin-9-yl)-4-hydroxy-3-phosphonooxy-tetrahydrofuran-2-yl]methoxy-hydroxy-phosphoryl]oxy-hydroxy-phosphoryl]oxy-2-hydroxy-3,3-dimethyl-butanoyl]amino]propanoylamino]ethyl] henicosanethioate	299576341	CCCCCCCCCCCCCCCCCCCCC(=O)SCCNC(=O)CCNC(=O)C(C(COP(=O)(OP(=O)(OCC1OC(C(C1OP(=O)(O)O)O)n1cnc2c1ncnc2N)O)O)(C)C)O
S-[2-[3-[[(2R)-4-[[[(2R,5R)-5-(6-aminopurin-9-yl)-4-hydroxy-3-phosphonooxy-tetrahydrofuran-2-yl]methoxy-hydroxy-phosphoryl]oxy-hydroxy-phosphoryl]oxy-2-hydroxy-3,3-dimethyl-butanoyl]amino]propanoylamino]ethyl] (5Z,8Z,11Z)-icosa-5,8,11-trienethioate	336846624	CCCCCCCCC=CCC=CCC=CCCCC(=O)SCCNC(=O)CCNC(=O)C(C(COP(=O)(OP(=O)(OCC1OC(C(C1OP(=O)(O)O)O)n1cnc2c1ncnc2N)O)O)(C)C)O
(3R,5R,7R,8R,9S,10S,13R,14S,17R)-7-hydroxy-10,13-dimethyl-17-[(2R)-5-oxo-5-(2-sulfoethylamino)pentan-2-yl]-2,3,4,5,6,7,8,9,11,12,14,15,16,17-tetradecahydro-1H-cyclopenta[a]phenanthrene-3-sulfonic acid	336950947	O=C(CCC(C1CCC2C1(C)CCC1C2C(O)CC2C1(C)CCC(C2)S(=O)(=O)O)C)NCCS(=O)(=O)O
icosa-3,6,9,12,15-pentaenoic acid	341983381	CCCCC=CCC=CCC=CCC=CCC=CCC(=O)O
(2R,3S,4R,5S)-2-(hydroxymethyl)-2,3,4,5-tetrahydropyran-3,4,5-triol	382905530	OCC1O[CH]C(C(C1O)O)O
docosa-10,13,16,19-tetraenoic acid	532269535	CCC=CCC=CCC=CCC=CCCCCCCCCC(=O)O
(2S,3S,4S,5R,6S)-6-[(3R,5R)-7-[(1S,2S,6S,8S,8aR)-6-hydroxy-2-methyl-8-[(2S)-2-methyl-1-oxobutoxy]-1,2,6,7,8,8a-hexahydronaphthalen-1-yl]-3,5-dihydroxy-1-oxoheptoxy]-3,4,5-trihydroxy-2-oxanecarboxylic acid	536530020	CCC(C(=O)OC1CC(O)C=C2C1C(CCC(CC(CC(=O)OC1OC(C(=O)O)C(C(C1O)O)O)O)O)C(C=C2)C)C
(2S,4S,5R,6R)-5-acetamido-6-[(1S,2R)-2-[[(2S,4S,5R,6R)-5-acetamido-6-[(1S,2R)-2-[[(2S,4S,5R,6R)-5-acetamido-2-carboxy-4-hydroxy-6-[(1R,2R)-1,2,3-trihydroxypropyl]-2-oxanyl]oxy]-1,3-dihydroxypropyl]-2-carboxy-4-hydroxy-2-oxanyl]oxy]-1,3-dihydroxypropyl]-2-[[(2S,3R,4S,5S,6R)-2-[[(2R,3S,4R,5R,6R)-6-[(E,2S,3R)-2-acetamido-3-hydroxyoctadec-4-enoxy]-4,5-dihydroxy-2-(hydroxymethyl)-3-oxanyl]oxy]-3,5-dih…	545187637	CCCCCCCCCCCCCC=CC(C(NC(=O)C)COC1OC(CO)C(C(C1O)O)OC1OC(CO)C(C(C1O)OC1(CC(O)C(C(O1)C(C(OC1(CC(O)C(C(O1)C(C(OC1(CC(O)C(C(O1)C(C(CO)O)O)NC(=O)C)C(=O)O)CO)O)NC(=O)C)C(=O)O)CO)O)NC(=O)C)C(=O)O)O)O
(4S)-4-amino-5-[[carboxy-(propylthio)methyl]amino]-5-oxopentanoic acid	648223294	CCCSC(C(=O)O)NC(=O)C(CCC(=O)O)N
4-(3-oxopropylamino)butanal	650490988	O=CCCNCCCC=O
S-[2-[3-[[(2R)-4-[[[(2R,3S,4R,5R)-5-(6-aminopurin-9-yl)-4-hydroxy-3-phosphonooxy-tetrahydrofuran-2-yl]methoxy-hydroxy-phosphoryl]oxy-hydroxy-phosphoryl]oxy-2-hydroxy-3,3-dimethyl-butanoyl]amino]propanoylamino]ethyl] 3-oxoheptanethioate	662289887	CCCCC(=O)CC(=O)SCCNC(=O)CCNC(=O)C(C(COP(=O)(OP(=O)(OCC1OC(C(C1OP(=O)(O)O)O)n1cnc2c1ncnc2N)O)O)(C)C)O
S-[2-[3-[[(2R)-4-[[[(2R,3S,4R,5R)-5-(6-aminopurin-9-yl)-4-hydroxy-3-phosphonooxy-tetrahydrofuran-2-yl]methoxy-hydroxy-phosphoryl]oxy-hydroxy-phosphoryl]oxy-2-hydroxy-3,3-dimethyl-butanoyl]amino]propanoylamino]ethyl] (E)-hept-2-enethioate	662292472	CCCCC=CC(=O)SCCNC(=O)CCNC(=O)C(C(COP(=O)(OP(=O)(OCC1OC(C(C1OP(=O)(O)O)O)n1cnc2c1ncnc2N)O)O)(C)C)O
(4S,5R,6R,7R,8R)-4,5,6,7,8-pentahydroxy-2-oxo-9-phosphonooxynonanoic acid	779334169	OC(C(C(C(CC(=O)C(=O)O)O)O)O)C(COP(=O)(O)O)O
S-[2-[3-[[(2R)-4-[[[(2R,3S,4R,5R)-5-(6-aminopurin-9-yl)-4-hydroxy-3-phosphonooxy-tetrahydrofuran-2-yl]methoxy-hydroxy-phosphoryl]oxy-hydroxy-phosphoryl]oxy-2-hydroxy-3,3-dimethyl-butanoyl]amino]propanoylamino]ethyl] (5E,8E)-3-hydroxytetradeca-5,8-dienethioate	780090205	CCCCCC=CCC=CCC(CC(=O)SCCNC(=O)CCNC(=O)C(C(COP(=O)(OP(=O)(OCC1OC(C(C1OP(=O)(O)O)O)n1cnc2c1ncnc2N)O)O)(C)C)O)O
S-[2-[3-[[(2R)-4-[[[(2R,3S,4R,5R)-5-(6-aminopurin-9-yl)-4-hydroxy-3-phosphonooxy-tetrahydrofuran-2-yl]methoxy-hydroxy-phosphoryl]oxy-hydroxy-phosphoryl]oxy-2-hydroxy-3,3-dimethyl-butanoyl]amino]propanoylamino]ethyl] furan-3-carbothioate	781852355	O=C(NCCSC(=O)c1cocc1)CCNC(=O)C(C(COP(=O)(OP(=O)(OCC1OC(C(C1OP(=O)(O)O)O)n1cnc2c1ncnc2N)O)O)(C)C)O
3-[(2-acetamido-2-carboxyethyl)thio]-3-(1H-imidazol-5-yl)propanoic acid	790880935	OC(=O)CC(c1[nH]cnc1)SCC(C(=O)O)NC(=O)C
(6E,8Z,11Z,14Z,17Z)-5-oxoicosa-6,8,11,14,17-pentaenoic acid	793564799	CCC=CCC=CCC=CCC=CC=CC(=O)CCCC(=O)O
3,6-bis(hydroxymethyl)-1,4-dioxane-2,5-dione	1104350997	OCC1OC(=O)C(OC1=O)CO
(3R)-3-[(Z)-icos-9-enoyl]oxy-4-(trimethylammonio)butanoate	1117727275	CCCCCCCCCCC=CCCCCCCCC(=O)OC(C[N+](C)(C)C)CC(=O)[O-]
S-[2-[3-[[(2R)-4-[[[(2R,3S,4R,5R)-5-(6-aminopurin-9-yl)-4-hydroxy-3-phosphonooxy-tetrahydrofuran-2-yl]methoxy-hydroxy-phosphoryl]oxy-hydroxy-phosphoryl]oxy-2-hydroxy-3,3-dimethyl-butanoyl]amino]propanoylamino]ethyl] 2-methyl-3-oxo-pentanethioate	1156924859	CCC(=O)C(C(=O)SCCNC(=O)CCNC(=O)C(C(COP(=O)(OP(=O)(OCC1OC(C(C1OP(=O)(O)O)O)n1cnc2c1ncnc2N)O)O)(C)C)O)C
ATP	1467865531	OC1C(COP(=O)(OP(=O)(OP(=O)(O)[O-])[O-])[O-])OC(C1O)n1cnc2c1ncnc2N
NAD+	1467865544	OC1C(O)C(OC1[n+]1cccc(c1)C(=O)N)COP(=O)(OP(=O)(OCC1OC(C(C1O)O)n1cnc2c1ncnc2N)O)O
NADH	1467865563	OC1C(O)C(OC1N1C=CCC(=C1)C(=O)N)COP(=O)(OP(=O)(OCC1OC(C(C1O)O)n1cnc2c1ncnc2N)O)O
NADPH	1467865578	OC1C(O)C(OC1N1C=CCC(=C1)C(=O)N)COP(=O)(OP(=O)(OCC1OC(C(C1O)OP(=O)(O)O)n1cnc2c1ncnc2N)O)O
NADP+	1467865592	OC1C(O)C(OC1[n+]1cccc(c1)C(=O)N)COP(=O)(OP(=O)(OCC1OC(C(C1O)OP(=O)(O)O)n1cnc2c1ncnc2N)O)O
Oxygen	1467865610	O=O
ADP	1467865623	OC1C(COP(=O)(OP(=O)([O-])[O-])[O-])OC(C1O)n1cnc2c1ncnc2N
Orthophosphate	1467865636	[O-]P(=O)(O)O
CoA	1467865652	SCCNC(=O)CCNC(=O)C(C(COP(=O)(OP(=O)(OCC1OC(C(C1OP(=O)(O)O)O)n1cnc2c1ncnc2N)O)O)(C)C)O
CO2	1467865667	O=C=O
Diphosphate	1467865687	[O-]P(=O)(OP(=O)([O-])[O-])[O-]
UDP	1467865718	OC1C(COP(=O)(OP(=O)(O)O)O)OC(C1O)n1ccc(=O)[nH]c1=O
FAD	1467865731	O=c1[nH]c(=O)c2c(n1)n(CC(C(C(COP(=O)(OP(=O)(OCC1OC(C(C1O)O)n1cnc3c1ncnc3N)O)O)O)O)O)c1c(n2)cc(c(c1)C)C
Pyridoxal phosphate	1467865752	O=Cc1c(COP(=O)(O)O)cnc(c1O)C
S-Adenosyl-L-methionine	1467865767	C[S+](CC1OC(C(C1O)O)n1cnc2c1ncnc2N)CCC(C(=O)[O-])[NH3+]
AMP	1467865783	OC1C(O)C(OC1n1cnc2c1nc[nH+]c2N)COP(=O)(O)O
S-Adenosyl-L-homocysteine	1467865798	OC(=O)C(CCSCC1OC(C(C1O)O)n1cnc2c1ncnc2N)N
Pyruvate	1467865812	OC(=O)C(=O)C
Acetyl-CoA	1467865841	O=C(NCCSC(=O)C)CCNC(=O)C(C(COP(=O)(OP(=O)(OCC1OC(C(C1OP(=O)(O)O)O)n1cnc2c1ncnc2N)O)O)(C)C)O
L-Glutamate	1467865856	[O-]C(=O)CCC(C(=O)[O-])N
2-Oxoglutarate	1467865872	[O-]C(=O)CCC(=O)C(=O)[O-]
Hydrogen peroxide	1467865888	OO
UDP-glucose	1467865910	OCC1OC(OP(=O)(OP(=O)(OCC2OC(C(C2O)O)n2ccc(=O)[nH]c2=O)O)O)C(C(C1O)O)O
D-Glucose	1467865936	OCC1OC(O)C(C(C1O)O)O
Heme	1467865953	C=Cc1c(C)c2n3c1C=C1C(=C(C4=[N+]1[Fe-2]13[N+]3=C(C(=C(C3=C2)C)CCC(=O)[O-])C=c2n1c(=C4)c(c2CCC(=O)[O-])C)C=C)C
Acetate	1467865967	CC(=O)O
GDP	1467865994	OC1C(COP(=O)(OP(=O)(O)[O-])[O-])OC(C1O)n1cnc2c1nc(N)[nH]c2=O
Oxaloacetate	1467866007	OC(=O)CC(=O)C(=O)O
Glycine	1467866026	OC(=O)C[NH3+]
Zinc cation	1467866041	[Zn+2]
Acyl-CoA	1467866070	O=C(NCCSC(=O)[R])CCNC(=O)C(C(COP(=O)(OP(=O)(OCC1OC(C(C1OP(=O)(O)O)O)n1cnc2c1ncnc2N)O)O)(C)C)O
L-Alanine	1467866080	[O-]C(=O)C([N+])C
Succinate	1467866095	[O-]C(=O)CCC(=O)[O-]
UDP-N-acetyl-alpha-D-glucosamine	1467866112	OCC1OC(OP(=O)(OP(=O)(OCC2OC(C(C2O)O)n2ccc(nc2=O)O)O)O)C(C(C1O)O)N=C(O)C
GTP	1467866127	OC1C(COP(=O)(OP(=O)(OP(=O)(O)O)O)O)OC(C1O)n1cnc2c1nc(N)[nH]c2=O
L-Lysine	1467866162	[NH3+]CCCCC(C(=O)[O-])[NH3+]
Glyoxylate	1467866177	O=CC(=O)O
L-Aspartate	1467866192	OC(=O)CC(C(=O)O)N
Glutathione	1467866214	SCC(C(=O)NCC(=O)O)NC(=O)CCC(C(=O)O)N
3'-Phosphoadenylyl sulfate	1467866249	OC1C(OP(=O)(O)O)C(OC1n1cnc2c1ncnc2N)COP(=O)(OS(=O)(=O)O)O
Adenosine 3',5'-bisphosphate	1467866262	OC1C(OP(=O)(O)O)C(OC1n1cnc2c1ncnc2N)COP(=O)(O)O
CMP	1467866276	OC1C(O)C(OC1n1ccc(nc1=O)N)COP(=O)(O)O
Formate	1467866289	OC=O
Sulfate	1467866306	[O-]S(=O)(=O)O
Carboxylate	1467866320	[O-]C(=O)[R]
FMN	1467866330	O=c1[nH]c(=O)c2c(n1)n(CC(C(C(COP(=O)(O)O)O)O)O)c1c(n2)cc(c(c1)C)C
L-Arginine	1467866345	NC(=N)NCCCC(C(=O)[O-])N
CTP	1467866360	OC1C(COP(=O)(OP(=O)(OP(=O)(O)O)O)O)OC(C1O)n1ccc(nc1=O)N
L-Glutamine	1467866374	NC(=O)CCC(C(=O)O)[NH3+]
L-Serine	1467866388	OCC(C(=O)O)N
Formaldehyde	1467866414	C=O
Thiamin diphosphate	1467866431	Cc1ncc(c(n1)N)C[n+]1csc(c1C)CCOP(=O)(OP(=O)([O-])[O-])[O-]
Ascorbate	1467866475	OCC(C1OC(=O)C(=C1O)O)O
L-Methionine	1467866492	[O-]C(=O)C(CCSC)N
Phosphoenolpyruvate	1467866507	OC(=O)C(=C)OP(=O)(O)O
UTP	1467866522	OC1C(COP(=O)(OP(=O)(OP(=O)([O-])[O-])[O-])[O-])OC(C1O)n1ccc(=O)[nH]c1=O
Calcium cation	1467866535	[Ca+2]
L-Ornithine	1467866549	[O-]C(=O)C(CCCN)N
L-Tryptophan	1467866565	OC(=O)C(Cc1c[nH]c2c1cccc2)N
L-Phenylalanine	1467866580	[NH3+]C(C(=O)O)Cc1ccccc1
ITP	1467866603	OC1C(COP(=O)(OP(=O)(OP(=O)([O-])[O-])[O-])[O-])OC(C1O)n1cnc2c1nc[nH]c2=O
L-Tyrosine	1467866617	[O-]C(=O)C(Cc1ccc(cc1)[O-])N
Malonyl-CoA	1467866633	O=C(NCCSC(=O)CC(=O)O)CCNC(=O)C(C(COP(=O)(OP(=O)(OCC1OC(C(C1OP(=O)(O)O)O)n1cnc2c1ncnc2N)O)O)(C)C)O
Acetaldehyde	1467866648	CC=O
D-Fructose 6-phosphate	1467866662	OCC1(O)OC(C(C1O)O)COP(=O)(O)O
Urea	1467866677	NC(=O)N
Nitrite	1467866704	ON=O
Sucrose	1467866715	OCC1OC(C(C1O)O)(CO)OC1OC(CO)C(C(C1O)O)O
Succinyl-CoA	1467866749	O=C(NCCSC(=O)CCC(=O)O)CCNC(=O)C(C(COP(=O)(OP(=O)(OCC1OC(C(C1OP(=O)(O)O)O)n1cnc2c1ncnc2N)O)O)(C)C)O
D-Glucose 6-phosphate	1467866763	OC1OC(COP(=O)(O)O)C(C(C1O)O)O
sn-Glycerol 3-phosphate	1467866778	OCC(COP(=O)(O)O)O
D-Fructose	1467866805	OCC1OC(C(C1O)O)(O)CO
GDP-mannose	1467866821	OCC1OC(OP(=O)(OP(=O)(OCC2OC(C(C2O)O)n2cnc3c2[nH]c(N)nc3=O)O)O)C(C(C1O)O)O
L-Cysteine	1467866836	NC(C(=O)O)CS
beta-Alanine	1467866856	NCCC(=O)O
Propanoyl-CoA	1467866871	CCC(=O)SCCNC(=O)CCNC(=O)C(C(COP(=O)(OP(=O)(OCC1OC(C(C1OP(=O)(O)O)O)n1cnc2c1ncnc2N)O)O)(C)C)O
Tetrahydrofolate	1467866885	OC(=O)CCC(C(=O)O)NC(=O)c1ccc(cc1)NCC1CNc2c(N1)c(=O)[nH]c(n2)N
D-Glucose 1-phosphate	1467866916	OCC1OC(OP(=O)(O)O)C(C(C1O)O)O
IDP	1467866932	OC1C(COP(=O)(OP(=O)(O)O)O)OC(C1O)n1cnc2c1nc[nH]c2=O
UMP	1467866945	OC1C(O)C(OC1n1ccc(=O)[nH]c1=O)COP(=O)(O)O
Uracil	1467866960	O=c1cc[nH]c(=O)[nH]1
Anthranilate	1467866980	OC(=O)c1ccccc1N
2-Oxobutanoate	1467866997	CCC(=O)C(=O)O
Dolichyl phosphate	1467867018	CC(CCOP(=O)(O)O)CCC=C(CCC=C(CCC=C(CCC=C(C)C)C)C)C
Glycerone phosphate	1467867028	OCC(=O)COP(=O)(O)O
CDP	1467867043	OC1C(COP(=O)(OP(=O)(O)O)O)OC(C1O)n1ccc(nc1=O)N
Choline	1467867073	OCC[N+](C)(C)C
Glycerol	1467867087	OCC(CO)O
D-Ribose 5-phosphate	1467867103	OC1C(O)OC(C1O)COP(=O)(O)O
D-Glyceraldehyde 3-phosphate	1467867117	O=CC(COP(=O)(O)O)O
5-Phospho-alpha-D-ribose 1-diphosphate	1467867132	OC1C(OC(C1O)COP(=O)(O)O)OP(=O)(OP(=O)(O)O)O
Biotin	1467867147	OC(=O)CCCCC1SCC2C1NC(=O)N2
D-Ribose	1467867163	OCC1OC(C(C1O)O)O
Fumarate	1467867176	[O-]C(=O)C=CC(=O)O
L-Leucine	1467867191	[N+]C(C(=O)[O-])CC(C)C
Ferricytochrome c	1467867221	[R]NC(=O)C(NC(=O)[R])CSC(C1=C(C)C2=Cc3n4[Fe+]n5c(=CC1=N2)c(C)c(c5=CC1=NC(=Cc4c(c3C(SCC(C(=O)N[R])NC(=O)[R])C)C)C(=C1CCC(=O)O)C)CCC(=O)O)C
Ferrocytochrome c	1467867230	[R]NC(=O)C(NC(=O)[R])CSC(C1=C(C)C2=Cc3c(C(SCC(C(=O)N[R])NC(=O)[R])C)c(c4n3[Fe]n3c(=CC1=N2)c(C)c(c3=CC1=NC(=C4)C(=C1CCC(=O)O)C)CCC(=O)O)C)C
Glutathione disulfide	1467867240	O=C(NC(C(=O)NCC(=O)[O-])CSSCC(C(=O)NCC(=O)[O-])NC(=O)CCC(C(=O)[O-])[N+])CCC(C(=O)[O-])[N+]
CMP-N-acetylneuraminate	1467867255	OCC(C(C1OC(CC(C1NC(=O)C)O)(OP(=O)(OCC1OC(C(C1O)O)n1ccc(nc1=O)N)O)C(=O)O)O)O
Isopentenyl diphosphate	1467867268	CC(=C)CCOP(=O)(OP(=O)(O)O)O
IMP	1467867285	OC1C(O)C(OC1n1cnc2c1nc[nH]c2=O)COP(=O)(O)O
dATP	1467867300	OC1CC(OC1COP(=O)(OP(=O)(OP(=O)(O)[O-])[O-])[O-])n1cnc2c1ncnc2N
Methanol	1467867313	CO
Putrescine	1467867342	[N+]CCCC[N+]
L-Histidine	1467867359	[O-]C(=O)C(Cc1c[nH]cn1)N
Butanoyl-CoA	1467867373	CCCC(=O)SCCNC(=O)CCNC(=O)C(C(COP(=O)(OP(=O)(OCC1OC(C(C1OP(=O)(O)O)O)n1cnc2c1ncnc2N)O)O)(C)C)O
myo-Inositol	1467867385	OC1C(O)C(O)C(C(C1O)O)O
N-Acetyl-D-glucosamine	1467867422	OCC1OC(O)C(C(C1O)O)NC(=O)C
3-Methyl-2-oxobutanoic acid	1467867437	CC(C(=O)C(=O)O)C
5,10-Methylenetetrahydrofolate	1467867460	OC(=O)CCC(C(=O)O)NC(=O)c1ccc(cc1)N1CC2N(C1)c1c(NC2)nc([nH]c1=O)N
GMP	1467867475	OC1C(O)C(OC1n1cnc2c1nc(N)[nH]c2=O)COP(=O)(O)O
Adenine	1467867515	Nc1ncnc2c1nc[nH]2
L-Proline	1467867529	[O-]C(=O)C1CCC[NH2+]1
(S)-Malate	1467867543	OC(=O)CC(C(=O)O)O
L-Asparagine	1467867581	NC(=O)CC(C(=O)[O-])N
Nicotinamide	1467867595	NC(=O)c1cccnc1
Palmitoyl-CoA	1467867611	CCCCCCCCCCCCCCCC(=O)SCCN=C(CCN=C(C(C(COP(=O)(OP(=O)(OCC1OC(C(C1OP(=O)(O)O)O)n1cnc2c1ncnc2N)O)O)(C)C)O)O)O
L-Homocysteine	1467867625	[O-]C(=O)C(CCS)N
4-Hydroxybenzoate	1467867640	Oc1ccc(cc1)C(=O)O
Phosphatidylcholine	1467867656	[R]C(=O)OC(COP(=O)(OCC[N+](C)(C)C)[O-])COC(=O)[R]
Citrate	1467867671	OC(=O)C(CC(=O)O)(CC(=O)O)O
Glycolate	1467867702	OCC(=O)O
Fatty acid	1467867728	OC(=O)[R]
Propanoate	1467867736	CCC(=O)O
Acetoacetate	1467867754	CC(=O)CC(=O)O
Phenylpyruvate	1467867780	O=C(C(=O)O)Cc1ccccc1
UDP-glucuronate	1467867798	OC1C(COP(=O)(OP(=O)(OC2OC(C(=O)O)C(C(C2O)O)O)O)O)OC(C1O)n1ccc(=O)[nH]c1=O
Hydroxypyruvate	1467867813	OCC(=O)C(=O)O
Carbamoyl phosphate	1467867829	NC(=O)OP(=O)(O)O
5'-Methylthioadenosine	1467867842	CSCC1OC(C(C1O)O)n1cnc2c1ncnc2N
Thymine	1467867917	Cc1c[nH]c(=O)[nH]c1=O
Agmatine	1467867931	[N+]CCCCNC(=[N+])N
Benzoate	1467867945	OC(=O)c1ccccc1
D-Xylose	1467867962	OC1COC(C(C1O)O)O
L-Valine	1467867986	NC(C(=O)[O-])C(C)C
Glycerone	1467868000	OCC(=O)CO
Cellobiose	1467868016	OCC1OC(O)C(C(C1OC1OC(CO)C(C(C1O)O)O)O)O
(S)-Lactate	1467868029	OC(=O)C(O)C
Cholesterol	1467868045	CC(CCCC(C1CCC2C1(C)CCC1C2CC=C2C1(C)CCC(C2)O)C)C
L-Threonine	1467868061	[O-]C(=O)C(C(O)C)N
Ethanolamine	1467868075	NCCO
UDP-D-xylose	1467868090	OC1C(COP(=O)(OP(=O)(OC2OCC(C(C2O)O)O)O)O)OC(C1O)n1ccc(=O)[nH]c1=O
D-Glucuronate	1467868103	OC1OC(C(=O)O)C(C(C1O)O)O
3-Phospho-D-glycerate	1467868189	OC(=O)C(COP(=O)(O)O)O
D-Ribulose 5-phosphate	1467868222	OCC(=O)C(C(COP(=O)(O)O)O)O
dADP	1467868301	OC1CC(OC1COP(=O)(OP(=O)(O)O)O)n1cnc2c1ncnc2N
Acetone	1467868313	CC(=O)C
Oxalate	1467868344	OC(=O)C(=O)[O-]
Adenosine	1467868376	OCC1OC(C(C1O)O)n1cnc2c1ncnc2N
Sarcosine	1467868389	C[NH2+]CC(=O)O
Thymidine	1467868402	OCC1OC(CC1O)n1cc(C)c(=O)[nH]c1=O
Methylamine	1467868450	C[N+]
Arachidonate	1467868463	CCCCCC=CCC=CCC=CCC=CCCCC(=O)O
3-Oxopropanoate	1467868504	O=CCC(=O)O
p-Coumaroyl-CoA	1467868515	O=C(NCCSC(=O)C=Cc1ccc(cc1)O)CCNC(=O)C(C(COP(=O)(OP(=O)(OCC1OC(C(C1OP(=O)(O)O)O)n1cnc2c1ncnc2N)O)O)(C)C)O
Adenylyl sulfate	1467868530	OC1C(COP(=O)(OS(=O)(=O)O)O)OC(C1O)n1cnc2c1ncnc2N
Succinate semialdehyde	1467868613	O=CCCC(=O)O
4-Methyl-2-oxopentanoate	1467868629	CC(CC(=O)C(=O)O)C
10-Formyltetrahydrofolate	1467868643	O=CN(c1ccc(cc1)C(=O)NC(C(=O)O)CCC(=O)O)CC1CNc2c(N1)c(=O)nc([nH]2)N
Dimethylallyl diphosphate	1467868655	CC(=CCOP(=O)(OP(=O)(O)O)O)C
3-Phospho-D-glyceroyl phosphate	1467868676	O=C(C(COP(=O)(O)O)O)OP(=O)(O)O
CO	1467868692	[C-]#[O+]
Potassium cation	1467868704	[K+]
dCMP	1467868718	OC1CC(OC1COP(=O)(O)O)n1ccc(nc1=O)N
Guanine	1467868747	Nc1[nH]c(=O)c2c(n1)[nH]cn2
Taurine	1467868789	NCCS(=O)(=O)O
Butanoic acid	1467868804	CCCC(=O)O
L-Sorbose	1467868822	OCC1(O)OCC(C(C1O)O)O
Lipoamide	1467868835	NC(=O)CCCCC1SSCC1
Hexadecanoic acid	1467868847	CCCCCCCCCCCCCCCC(=O)O
Pyridoxal	1467868867	O=Cc1c(CO)cnc(c1O)C
Isomaltose	1467868895	OCC1OC(OCC2OC(O)C(C(C2O)O)O)C(C(C1O)O)O
Nicotinate	1467868908	OC(=O)c1cccnc1
Riboflavin	1467868938	OCC(C(C(Cn1c2cc(C)c(cc2nc2c1nc(=O)[nH]c2=O)C)O)O)O
D-Gluconic acid	1467868971	OCC(C(C(C(C(=O)O)O)O)O)O
D-Glycerate	1467868986	OCC(C(=O)O)O
Hypoxanthine	1467869030	Oc1ncnc2c1[nH]cn2
L-Homoserine	1467869044	[O-]C(=O)C(CCO)N
Dithiothreitol	1467869065	SCC(C(CS)O)O
Glycolaldehyde	1467869079	OCC=O
Dihydrobiopterin	1467869105	NC1=NC(=O)C2=NC(CNC2=N1)C(C(O)C)O
CDP-diacylglycerol	1467869119	[R]C(=O)OC(COP(=O)(OP(=O)(OCC1OC(C(C1O)O)n1ccc(nc1=O)N)O)O)COC(=O)[R]
N-Acetylneuraminate	1467869128	OCC(C(C1OC(O)(CC(C1NC(=O)C)O)C(=O)O)O)O
Tetrahydrobiopterin	1467869144	CC(C(C1CNc2c(N1)c(=O)nc([nH]2)N)O)O
D-Erythrose 4-phosphate	1467869180	O=CC(C(COP(=O)(O)O)O)O
Androstenedione	1467869193	O=C1CCC2(C(=C1)CCC1C2CCC2(C1CCC2=O)C)C
Hydrogen sulfide	1467869221	S
dGTP	1467869250	OC1CC(OC1COP(=O)(OP(=O)(OP(=O)(O)[O-])[O-])[O-])n1cnc2c1nc(N)[nH]c2=O
Inosine	1467869312	OCC1OC(C(C1O)O)n1cnc2c1[nH]cnc2=O
Orotate	1467869325	O=c1[nH]c(=O)[nH]c(c1)C(=O)O
Uridine	1467869376	OCC1OC(C(C1O)O)n1ccc(=O)[nH]c1=O
Creatine	1467869389	OC(=O)CN(C(=N)N)C
ADP-ribose	1467869403	OC1C(COP(=O)(OP(=O)(OCC2OC(C(C2O)O)O)O)O)OC(C1O)n1cnc2c1ncnc2N
CDP-choline	1467869473	OC1C(COP(=O)(OP(=O)(OCC[N+](C)(C)C)[O-])O)OC(C1O)n1ccc(nc1=O)N
Isocitrate	1467869532	OC(=O)CC(C(C(=O)O)O)C(=O)O
Pyridoxine	1467869570	OCc1c(CO)cnc(c1O)C
Spermidine	1467869584	[N+]CCC[N+]CCCC[N+]
Sphingosine	1467869624	CCCCCCCCCCCCCC=CC(C(CO)[N+])O
2-Oxoadipate	1467869652	OC(=O)CCCC(=O)C(=O)O
GDP-L-fucose	1467869690	OC1C(COP(=O)(OP(=O)(OC2OC(C)C(C(C2O)O)O)O)O)OC(C1O)n1cnc2c1[nH]c(N)nc2=O
L-Citrulline	1467869709	NC(=O)NCCCC(C(=O)[O-])N
L-Kynurenine	1467869724	OC(=O)C(CC(=O)c1ccccc1N)N
D-Glucosamine	1467869737	OCC1OC(O)C(C(C1O)O)[NH3+]
Deoxyguanosine	1467869751	OCC1OC(CC1O)n1cnc2c1nc(N)[nH]c2=O
Acetoacetyl-CoA	1467869780	O=C(NCCSC(=O)CC(=O)C)CCNC(=O)C(C(COP(=O)(OP(=O)(OCC1OC(C(C1OP(=O)(O)O)O)n1cnc2c1ncnc2N)O)O)(C)C)O
4-Aminobutanoate	1467869810	NCCCC(=O)O
(S)-Dihydroorotate	1467869829	O=C1NC(=O)NC(C1)C(=O)O
Geranyl diphosphate	1467869865	CC(=CCOP(=O)(OP(=O)(O)O)O)CCC=C(C)C
Thioredoxin	1467869879	SCC(C(=O)NC(C(=O)NC(C(=O)NC(C(=O)[R])CS)[R])[R])N[R]
Thioredoxin disulfide	1467869888	[R]NC1CSSCC(NC(=O)C(NC(=O)C(NC1=O)[R])[R])C(=O)[R]
Phosphatidylglycerol	1467869897	OCC(COP(=O)(OCC(OC(=O)[R])COC(=O)[R])O)O
6-Phospho-D-gluconate	1467869909	OC(C(C(C(C(=O)[O-])O)O)O)COP(=O)([O-])[O-]
Ethanolamine phosphate	1467869921	NCCOP(=O)(O)O
2-Methyl-3-oxopropanoate	1467869957	O=CC(C(=O)O)C
Phosphatidylethanolamine	1467869969	NCCOP(=O)(OCC(OC(=O)[R])COC(=O)[R])O
D-Glucosamine 6-phosphate	1467869989	OC1C(COP(=O)([O-])[O-])OC(C(C1O)[N+])O
Geranylgeranyl diphosphate	1467870003	CC(=CCCC(=CCOP(=O)(OP(=O)(O)O)O)C)CCC=C(CCC=C(C)C)C
D-Fructose 1,6-bisphosphate	1467870021	OC1C(COP(=O)(O)O)OC(C1O)(O)COP(=O)(O)O
3,4-Dihydroxy-L-phenylalanine	1467870034	[O-]C(=O)C(Cc1ccc(c(c1)O)O)N
(S)-3-Hydroxy-3-methylglutaryl-CoA	1467870052	O=C(NCCSC(=O)CC(CC(=O)O)(O)C)CCNC(=O)C(C(COP(=O)(OP(=O)(OCC1OC(C(C1OP(=O)(O)O)O)n1cnc2c1ncnc2N)O)O)(C)C)O
N-Acetyl-D-glucosamine 6-phosphate	1467870068	CC(=O)NC1C(O)OC(C(C1O)O)COP(=O)(O)O
dAMP	1467870079	OC1CC(OC1COP(=O)(O)O)n1cnc2c1ncnc2N
dGDP	1467870093	OC1CC(OC1COP(=O)(OP(=O)(O)O)O)n1cnc2c1nc(N)[nH]c2=O
dGMP	1467870104	OC1CC(OC1COP(=O)(O)O)n1cnc2c1nc(N)[nH]c2=O
dTDP	1467870119	OC1CC(OC1COP(=O)(OP(=O)(O)[O-])[O-])n1cc(C)c(=O)[nH]c1=O
dTMP	1467870132	OC1CC(OC1COP(=O)(O)O)n1cc(C)c(=O)[nH]c1=O
dUMP	1467870149	OC1CC(OC1COP(=O)(O)O)n1ccc(=O)[nH]c1=O
Urate	1467870164	Oc1[nH]c(O)c2c(n1)nc(n2)O
Sterol	1467870194	OC1CCC2C(C1)CCC1C2CCC2C1CCC2
Retinal	1467870261	O=CC=C(C=CC=C(C=CC1=C(C)CCCC1(C)C)C)C
Thiamine	1467870286	OCCc1sc[n+](c1C)Cc1cnc(nc1N)C
Xylitol	1467870302	OCC(C(C(CO)O)O)O
Cytosine	1467870314	Nc1cc[nH]c(=O)n1
Dolichol	1467870327	OCCC(CCC=C(CCC=C(CCC=C(CCC=C(C)C)C)C)C)C
Malonate	1467870335	[O-]C(=O)CC(=O)O
Xanthine	1467870360	O=c1[nH]c(=O)c2c([nH]1)nc[nH]2
Carnosine	1467870373	[N+]CCC(=O)NC(C(=O)[O-])Cc1nc[nH]c1
Guanosine	1467870385	OCC1OC(C(C1O)O)n1cnc2c1nc(N)[nH]c2=O
Histamine	1467870398	NCCc1c[nH]cn1
Mannitol	1467870443	OCC(C(C(C(CO)O)O)O)O
Tryptamine	1467870508	NCCc1c[nH]c2c1cccc2
Polyphosphate	1467870577	[O-]P(=O)(OP(=O)(OP(=O)(O)O)O)O
L-Isoleucine	1467870608	CCC(C(C(=O)[O-])N)C
L-Pipecolate	1467870623	[O-]C(=O)C1CCCC[NH2+]1
Methanethiol	1467870640	CS
Progesterone	1467870654	O=C1CCC2(C(=C1)CCC1C2CCC2(C1CCC2C(=O)C)C)C
Stearoyl-CoA	1467870680	CCCCCCCCCCCCCCCCCC(=O)SCCNC(=O)CCNC(=O)C(C(COP(=O)(OP(=O)(OCC1OC(C(C1OP(=O)(O)O)O)n1cnc2c1ncnc2N)O)O)(C)C)O
Dihydrofolate	1467870719	OC(=O)CCC(C(=O)O)NC(=O)c1ccc(cc1)NCC1=Nc2c(NC1)nc([nH]c2=O)N
Phosphatidate	1467870736	[R]C(=O)OC(COP(=O)(O)O)COC(=O)[R]
cis-Aconitate	1467870747	OC(=O)CC(=CC(=O)O)C(=O)O
(R)-Mevalonate	1467870760	OCCC(CC(=O)O)(O)C
Polysaccharide	1467870783	OCC1OC(OC2C(CO)OC(C(C2O)O)O)C(C(C1OC1OC(CO)C(C(C1O)O)O)O)O
(S)-Lactaldehyde	1467870817	CC(C=O)O
Prostaglandin H2	1467870840	CCCCCC(C=CC1C2OOC(C1CC=CCCCC(=O)O)C2)O
5,6-Dihydrouracil	1467870857	O=C1CCNC(=O)N1
5-Aminolevulinate	1467870875	[O-]C(=O)CCC(=O)CN
N-Acetylornithine	1467870941	CC(=O)NC(C(=O)O)CCCN
N-Carbamoyl-L-aspartate	1467870954	OC(=O)CC(C(=O)O)NC(=O)N
N-Formimino-L-glutamate	1467870966	OC(=O)C(NC=N)CCC(=O)O
5-Methyltetrahydrofolate	1467870978	OC(=O)CCC(C(=O)O)NC(=O)c1ccc(cc1)NCC1CNc2c(N1C)c(=O)[nH]c(n2)N
5,10-Methenyltetrahydrofolate	1467871009	OC(=O)CCC(C(=O)O)NC(=O)c1ccc(cc1)N1C=[N+]2C(C1)CNc1c2c(=O)[nH]c(n1)N
Sedoheptulose 1,7-bisphosphate	1467871033	OC(C(C(C(=O)COP(=O)(O)O)O)O)C(COP(=O)(O)O)O
trans,trans-Farnesyl diphosphate	1467871046	CC(=CCOP(=O)(OP(=O)(O)O)O)CCC=C(CCC=C(C)C)C
N6-(L-1,3-Dicarboxypropyl)-L-lysine	1467871065	OC(=O)CCC(C(=O)O)NCCCCC(C(=O)O)N
(S)-2,3,4,5-Tetrahydropyridine-2-carboxylate	1467871081	OC(=O)C1CCCC=N1
Nicotinamide D-ribonucleotide	1467871113	OC1C(O)C(OC1[n+]1cccc(c1)C(=O)N)COP(=O)(O)[O-]
dCTP	1467871133	OC1CC(OC1COP(=O)(OP(=O)(OP(=O)(O)O)O)O)n1ccc(nc1=O)N
dTTP	1467871146	OC1CC(OC1COP(=O)(OP(=O)(OP(=O)([O-])[O-])[O-])[O-])n1cc(C)c(=O)[nH]c1=O
dUTP	1467871159	OC1CC(OC1COP(=O)(OP(=O)(OP(=O)([O-])[O-])[O-])[O-])n1ccc(=O)[nH]c1=O
Estrone	1467871230	Oc1ccc2c(c1)CCC1C2CCC2(C1CCC2=O)C
Ethanol	1467871246	CCO
Retinol	1467871291	OCC=C(C=CC=C(C=CC1=C(C)CCCC1(C)C)C)C
Cytidine	1467871323	OCC1OC(C(C1O)O)n1ccc(nc1=O)N
Tyramine	1467871421	[N+]CCc1ccc(cc1)O
Bilirubin	1467871442	C=CC1=C(C)C(=Cc2[nH]c(c(c2C)CCC(=O)O)Cc2[nH]c(c(c2CCC(=O)O)C)C=C2NC(=O)C(=C2C=C)C)NC1=O
L-Carnitine	1467871455	OC(C[N+](C)(C)C)CC(=O)O
Glutarate	1467871481	OC(=O)CCCC(=O)O
Itaconate	1467871497	OC(=O)CC(=C)C(=O)O
L-Cystine	1467871513	NC(C(=O)O)CSSCC(C(=O)O)N
ADP-glucose	1467871604	OCC1OC(OP(=O)(OP(=O)(OCC2OC(C(C2O)O)n2cnc3c2ncnc3N)O)O)C(C(C1O)O)O
Allantoate	1467871616	OC(=O)C(NC(=O)N)NC(=O)N
Biliverdin	1467871630	C=CC1=C(C)C(=CC2=NC(=Cc3[nH]c(c(c3CCC(=O)O)C)C=C3NC(=O)C(=C3C=C)C)C(=C2C)CCC(=O)O)NC1=O
D-Xylonate	1467871653	OCC(C(C(C(=O)O)O)O)O
L-Cysteate	1467871703	[O-]C(=O)C(CS(=O)(=O)[O-])[N+]
L-Rhamnose	1467871718	OC1C(C)OC(C(C1O)O)O
Oleoyl-CoA	1467871766	CCCCCCCCC=CCCCCCCCC(=O)SCCNC(=O)CCNC(=O)C(C(COP(=O)(OP(=O)(OCC1OC(C(C1OP(=O)(O)O)O)n1cnc2c1ncnc2N)O)O)(C)C)O
Acrylic acid	1467871778	OC(=O)C=C
Benzoyl-CoA	1467871797	O=C(NCCSC(=O)c1ccccc1)CCNC(=O)C(C(COP(=O)(OP(=O)(OCC1OC(C(C1OP(=O)(O)O)O)n1cnc2c1ncnc2N)O)O)(C)C)O
Hexadecanal	1467871850	CCCCCCCCCCCCCCCC=O
Hypotaurine	1467871877	[O-]S(=O)CC[N+]
(-)-Limonene	1467871889	CC1=CCC(CC1)C(=C)C
Androsterone	1467871919	OC1CCC2(C(C1)CCC1C2CCC2(C1CCC2=O)C)C
Deoxyuridine	1467871955	OCC1OC(CC1O)n1ccc(=O)[nH]c1=O
Glutaryl-CoA	1467871969	O=C(NCCSC(=O)CCCC(=O)O)CCNC(=O)C(C(COP(=O)(OP(=O)(OCC1OC(C(C1OP(=O)(O)O)O)n1cnc2c1ncnc2N)O)O)(C)C)O
Itaconyl-CoA	1467872008	O=C(NCCSC(=O)CC(=C)C(=O)O)CCNC(=O)C(C(COP(=O)(OP(=O)(OCC1OC(C(C1OP(=O)(O)O)O)n1cnc2c1ncnc2N)O)O)(C)C)O
Nitric oxide	1467872033	[N]=O
Pyridoxamine	1467872046	NCc1c(CO)cnc(c1O)C
Testosterone	1467872060	O=C1CCC2(C(=C1)CCC1C2CCC2(C1CCC2O)C)C
Cob(II)alamin	1467872119	OCC1OC(C(C1OP(=O)(OC(CNC(=O)CCC1(C)C(CC(=O)N)C2N(C1=C(C)C1=NC(=CC3=NC(=C(C4=NC2(C)C(C)(CC(=O)N)C4CCC(=O)N)C)C(C3CCC(=O)N)(C)CC(=O)N)C(C1CCC(=O)N)(C)C)[Co+])C)[O-])O)n1cnc2c1cc(C)c(c2)C
Cystathionine	1467872129	NC(C(=O)O)CCSCC(C(=O)O)N
Homogentisate	1467872153	OC(=O)Cc1cc(O)ccc1O
Methylglyoxal	1467872180	O=CC(=O)C
L-Noradrenaline	1467872196	[N+]CC(c1ccc(c(c1)O)O)O
Sphingomyelin	1467872234	CCCCCCCCCCCCCC=CC(C(NC(=O)[R])COP(=O)(OCC[N+](C)(C)C)O)O
4-Aminobutyraldehyde	1467872278	O=CCCC[NH3+]
Deoxyadenosine	1467872331	OCC1OC(CC1O)n1cnc2c1ncnc2N
CDP-ethanolamine	1467872423	NCCOP(=O)(OP(=O)(OCC1OC(C(C1O)O)n1ccc(nc1=O)N)O)O
3',5'-Cyclic AMP	1467872465	OC1C2OP(=O)(O)OCC2OC1n1cnc2c1ncnc2N
Betaine aldehyde	1467872480	O=CC[N+](C)(C)C
D-Glyceraldehyde	1467872492	OC(C=O)CO
Dihydrolipoamide	1467872504	SCCC(CCCCC(=O)N)S
Guanidinoacetate	1467872529	NC(=N)NCC(=O)O
Phenylacetyl-CoA	1467872545	O=C(NCCSC(=O)Cc1ccccc1)CCNC(=O)C(C(COP(=O)(OP(=O)(OCC1OC(C(C1OP(=O)(O)O)O)n1cnc2c1ncnc2N)O)O)(C)C)O
Propane-1,2-diol	1467872558	OCC(O)C
Prostaglandin E2	1467872572	CCCCCC(C=CC1C(O)CC(=O)C1CC=CCCCC(=O)O)O
Protein tyrosine	1467872590	[R]NC(=O)C(Cc1ccc(cc1)O)NC(=O)[R]
Choline phosphate	1467872625	OP(=O)(OCC[N+](C)(C)C)O
Phenylacetaldehyde	1467872719	O=CCc1ccccc1
3-Sulfino-L-alanine	1467872773	[O-]S(=O)CC(C(=O)[O-])N
N-Acetyllactosamine	1467872809	OCC1OC(O)C(C(C1OC1OC(CO)C(C(C1O)O)O)O)NC(=O)C
N1-Acetylspermidine	1467872821	[N+]CCCC[N+]CCCNC(=O)C
3-Dehydro-L-gulonate	1467872878	OCC(C(C(=O)C(C(=O)O)O)O)O
r1p	1467872897	OCC1OC(C(C1O)O)OP(=O)(O)O
Dolichyl diphosphate	1467872910	CC(CCC=C(CCC=C(CCC=C(CCC=C(C)C)C)C)C)CCOP(=O)(OP(=O)(O)O)O
N-Acetyl-L-glutamate	1467872933	[O-]C(=O)CCC(C(=O)[O-])[NH2+]C(=O)C
Pyridoxine phosphate	1467872953	OCc1c(cnc(c1O)C)COP(=O)(O)O
2,5-Dihydroxybenzoate	1467872967	Oc1ccc(c(c1)C(=O)O)O
2-Methylpropanoyl-CoA	1467872984	O=C(NCCSC(=O)C(C)C)CCNC(=O)C(C(COP(=O)(OP(=O)(OCC1OC(C(C1OP(=O)(O)O)O)n1cnc2c1ncnc2N)O)O)(C)C)O
2-Phospho-D-glycerate	1467872997	OCC(C(=O)O)OP(=O)(O)O
3-Hydroxyanthranilate	1467873011	OC(=O)c1cccc(c1N)O
Indole-3-acetaldehyde	1467873072	O=CCc1c[nH]c2c1cccc2
Prostaglandin F2alpha	1467873094	CCCCCC(C=CC1C(O)CC(C1CC=CCCCC(=O)O)O)O
4-Hydroxyphenylacetate	1467873142	OC(=O)Cc1ccc(cc1)O
5-Hydroxy-L-tryptophan	1467873155	OC(=O)C(Cc1c[nH]c2c1cc(O)cc2)N
Pyridoxamine phosphate	1467873194	[N+]Cc1c(COP(=O)([O-])[O-])cnc(c1O)C
Xanthosine 5'-phosphate	1467873249	O=c1[nH]c(=O)c2c([nH]1)n(cn2)C1OC(C(C1O)O)COP(=O)(O)O
5-Formiminotetrahydrofolate	1467873313	N=CN1C(CNc2ccc(cc2)C(=O)NC(C(=O)O)CCC(=O)O)CNc2c1c(=O)[nH]c(n2)N
beta-D-Fructose 2,6-bisphosphate	1467873324	OCC1(OC(C(C1O)O)COP(=O)(O)O)OP(=O)(O)O
gamma-L-Glutamyl-L-cysteine	1467873367	SCC(C(=O)O)NC(=O)CCC(C(=O)O)N
sn-Glycero-3-phosphocholine	1467873383	OCC(COP(=O)(OCC[N+](C)(C)C)O)O
(S)-3-Methyl-2-oxopentanoic acid	1467873396	CC(C(=O)C(=O)O)CC
2-Deoxy-D-ribose 1-phosphate	1467873411	OCC1OC(CC1O)OP(=O)(O)O
2-Deoxy-D-ribose 5-phosphate	1467873423	OC1CC(C(O1)COP(=O)(O)O)O
5alpha-Androstane-3,17-dione	1467873434	O=C1CCC2(C(C1)CCC1C2CCC2(C1CCC2=O)C)C
1-Acyl-sn-glycerol 3-phosphate	1467873493	OC(COP(=O)(O)O)COC(=O)[R]
(S)-Methylmalonyl-CoA	1467873516	O=C(NCCSC(=O)C(C(=O)O)C)CCNC(=O)C(C(COP(=O)(OP(=O)(OCC1OC(C(C1OP(=O)(O)O)O)n1cnc2c1ncnc2N)O)O)(C)C)O
dtdpddm	1467873553	OC1CC(OC1COP(=O)(OP(=O)(OC1OC(C)C(=O)C(C1O)O)O)O)n1cc(C)c(=O)[nH]c1=O
Cholic acid	1467873622	OC1CCC2(C(C1)CC(C1C2CC(O)C2(C1CCC2C(CCC(=O)O)C)C)O)C
Prostaglandin D2	1467873639	CCCCCC(C=CC1C(=O)CC(C1CC=CCCCC(=O)O)O)O
XTP	1467873682	O=c1[nH]c(=O)c2c([nH]1)n(cn2)C1OC(C(C1O)O)COP(=O)(OP(=O)(OP(=O)([O-])[O-])[O-])[O-]
O2.-	1467873714	[O-][O]
dCDP	1467873724	OC1CC(OC1COP(=O)(OP(=O)(O)O)O)n1ccc(nc1=O)N
(9Z)-Octadecenoic acid	1467873776	CCCCCCCCC=CCCCCCCCC(=O)O
Betaine	1467873865	[O-]C(=O)C[N+](C)(C)C
Lipoate	1467873917	OC(=O)CCCCC1SSCC1
Cortisol	1467873991	OCC(=O)C1(O)CCC2C1(C)CC(O)C1C2CCC2=CC(=O)CCC12C
Spermine	1467874158	NCCCNCCCCNCCCN
Squalene	1467874171	CC(=CCCC=C(CCC=C(CCC=C(C)C)C)C)CCC=C(CCC=C(C)C)C
Cortisone	1467874296	OCC(=O)C1(O)CCC2C1(C)CC(=O)C1C2CCC2=CC(=O)CCC12C
Retinoate	1467874429	CC(=CC=CC(=CC(=O)O)C)C=CC1=C(C)CCCC1(C)C
Serotonin	1467874480	[N+]CCc1c[nH]c2c1cc(O)cc2
Urocanate	1467874510	[O-]C(=O)C=Cc1c[nH]cn1
L-Adrenaline	1467874542	C[N+]CC(c1ccc(c(c1)O)O)O
Creatinine	1467874573	O=C1NC(=N)N(C1)C
Formyl-CoA	1467874666	O=CSCCNC(=O)CCNC(=O)C(C(COP(=O)(OP(=O)(OCC1OC(C(C1OP(=O)(O)O)O)n1cnc2c1ncnc2N)O)O)(C)C)O
Pentanoate	1467874723	CCCCC(=O)O
4-Coumarate	1467874835	OC(=O)C=Cc1ccc(cc1)O
DGAL	1467874918	OC(C(C(=O)O)O)C(C(C(=O)O)O)O
Dopaquinone	1467874972	[O-]C(=O)C(CC1=CC(=O)C(=O)C=C1)[N+]
Naphthalene	1467875055	c1ccc2c(c1)cccc2
Pantetheine	1467875083	SCCNC(=O)CCNC(=O)C(C(CO)(C)C)O
Sphinganine	1467875124	CCCCCCCCCCCCCCCC(C(CO)[N+])O
dTDP-glucose	1467875183	OCC1OC(OP(=O)(OP(=O)(OCC2OC(CC2O)n2cc(C)c(=O)[nH]c2=O)O)O)C(C(C1O)O)O
4-Pyridoxate	1467875248	OCc1cnc(c(c1C(=O)O)O)C
Deamino-NAD+	1467875359	OC1C(O)C(OC1[n+]1cccc(c1)C(=O)[O-])COP(=O)(OP(=O)(OCC1OC(C(C1O)O)n1cnc2c1ncnc2N)[O-])[O-]
Gibberellin A1	1467875384	OC(=O)C1C2C3(C4C51CC(=C)C(C5)(O)CC4)CCC(C2(C)C(=O)O3)O
L-Rhamnulose	1467875411	OCC(=O)C(C(C(O)C)O)O
Pantothenate	1467875442	OCC(C(C(=O)NCCC(=O)O)O)(C)C
4-Nitrophenol	1467875485	Oc1ccc(cc1)[N+](=O)[O-]
Crotonoyl-CoA	1467875551	CC=CC(=O)SCCNC(=O)CCNC(=O)C(C(COP(=O)(OP(=O)(OCC1OC(C(C1OP(=O)(O)O)O)n1cnc2c1ncnc2N)O)O)(C)C)O
Deoxycytidine	1467875609	OCC1OC(CC1O)n1ccc(nc1=O)N
Dephospho-CoA	1467875621	SCCNC(=O)CCNC(=O)C(C(COP(=O)(OP(=O)(OCC1OC(C(C1O)O)n1cnc2c1ncnc2N)O)O)(C)C)O
Homocarnosine	1467875643	NCCCC(=O)NC(C(=O)O)Cc1c[nH]cn1
Pentanoyl-CoA	1467875694	CCCCC(=O)SCCNC(=O)CCNC(=O)C(C(COP(=O)(OP(=O)(OCC1OC(C(C1OP(=O)(O)O)O)n1cnc2c1ncnc2N)O)O)(C)C)O
Propenoyl-CoA	1467875744	C=CC(=O)SCCNC(=O)CCNC(=O)C(C(COP(=O)(OP(=O)(OCC1OC(C(C1OP(=O)(O)O)O)n1cnc2c1ncnc2N)O)O)(C)C)O
Citramalyl-CoA	1467875858	CC(C(=O)O)(CC(=O)SCCNC(=O)CCNC(=O)C(C(COP(=O)(OP(=O)(OCC1OC(C(C1OP(=O)(O)O)O)n1cnc2c1ncnc2N)O)O)(C)C)O)O
5,6-Dihydrothymine	1467875878	CC1CNC(=O)NC1=O
Leukotriene A4	1467875902	CCCCCC=CCC=CC=CC=CC1OC1CCCC(=O)O
Porphobilinogen	1467876094	[N+]Cc1[nH]cc(c1CC(=O)[O-])CCC(=O)[O-]
2-Oxoglutaramate	1467876178	NC(=O)CCC(=O)C(=O)O
3',5'-Cyclic GMP	1467876203	OC1C2OP(=O)(O)OCC2OC1n1cnc2c1nc(N)[nH]c2=O
Estradiol-17beta	1467876271	Oc1ccc2c(c1)CCC1C2CCC2(C1CCC2O)C
Indole-3-acetate	1467876294	OC(=O)Cc1c[nH]c2c1cccc2
L-2-Aminoadipate	1467876325	OC(=O)CCCC(C(=O)O)N
Mercaptopyruvate	1467876342	OC(=O)C(=O)CS
Prostaglandin B1	1467876366	CCCCCC(C=CC1=C(CCCCCCC(=O)O)C(=O)CC1)O
(-)-trans-Carveol	1467876414	CC(=C)C1CC=C(C(C1)O)C
N-Acetylserotonin	1467876547	CC(=O)NCCc1c[nH]c2c1cc(O)cc2
1,3-Diaminopropane	1467876613	[N+]CCC[N+]
2-Phosphoglycolate	1467876629	OC(=O)COP(=O)(O)O
4-Hydroxybutanoic acid	1467876642	OCCCC(=O)O
D-Alanyl-D-alanine	1467876684	[O-]C(=O)C(NC(=O)C([NH3+])C)C
O-Phospho-L-serine	1467876785	[O-]C(=O)C(COP(=O)([O-])[O-])[N+]
3-Hydroxypropanoate	1467876868	OCCC(=O)O
cis-4-Hydroxy-L-proline	1467876895	OC1CNC(C1)C(=O)O
Hydroxymethylbilane	1467876986	OCc1[nH]c(c(c1CC(=O)O)CCC(=O)O)Cc1[nH]c(c(c1CC(=O)O)CCC(=O)O)Cc1[nH]c(c(c1CC(=O)O)CCC(=O)O)Cc1[nH]cc(c1CC(=O)O)CCC(=O)O
N,N-Dimethylglycine	1467877005	[O-]C(=O)C[N+](C)C
N8-Acetylspermidine	1467877028	NCCCNCCCCNC(=O)C
S-Formylglutathione	1467877039	O=CSCC(C(=O)NCC(=O)[O-])NC(=O)CCC(C(=O)[O-])[NH3+]
2-Methylbutanoyl-CoA	1467877057	CCC(C(=O)SCCN=C(CCN=C(C(C(COP(=O)(OP(=O)(OCC1OC(C(C1OP(=O)(O)O)O)n1cnc2c1ncnc2N)O)O)(C)C)O)O)O)C
4-Maleylacetoacetate	1467877089	O=C(CC(=O)CC(=O)O)C=CC(=O)O
L-Gulono-1,4-lactone	1467877115	OCC(C1OC(=O)C(C1O)O)O
N-Acetyl-L-aspartate	1467877141	OC(=O)CC(C(=O)O)NC(=O)C
N-Formyl-L-glutamate	1467877174	O=CNC(C(=O)O)CCC(=O)O
Uroporphyrinogen III	1467877230	OC(=O)CCc1c2Cc3[nH]c(c(c3CC(=O)O)CCC(=O)O)Cc3[nH]c(Cc4[nH]c(Cc(c1CC(=O)O)[nH]2)c(CCC(=O)O)c4CC(=O)O)c(c3CCC(=O)O)CC(=O)O
(S)-2,3-Epoxysqualene	1467877253	CC(=CCCC=C(CCC=C(CCC1OC1(C)C)C)C)CCC=C(CCC=C(C)C)C
3,5-Diiodo-L-tyrosine	1467877299	[O-]C(=O)C(Cc1cc(I)c(c(c1)I)[O-])[N+]
O-Acetyl-L-homoserine	1467877450	CC(=O)OCCC(C(=O)[O-])[N+]
Protoporphyrinogen IX	1467877470	C=Cc1c2Cc3[nH]c(c(c3C)CCC(=O)O)Cc3[nH]c(Cc4[nH]c(Cc(c1C)[nH]2)c(C=C)c4C)c(c3CCC(=O)O)C
Thiamin monophosphate	1467877492	Cc1ncc(c(n1)N)C[n+]1csc(c1C)CCOP(=O)([O-])[O-]
alpha,alpha-Trehalose	1467877508	OCC1OC(OC2OC(CO)C(C(C2O)O)O)C(C(C1O)O)O
(R)-2-Hydroxyglutarate	1467877530	OC(=O)CCC(C(=O)O)O
(R)-3-Hydroxybutanoate	1467877551	CC(CC(=O)O)O
D-Fructose 1-phosphate	1467877616	OCC1OC(C(C1O)O)(O)COP(=O)(O)O
O-Phospho-L-homoserine	1467877700	[O-]C(=O)C(CCOP(=O)([O-])[O-])[NH3+]
Orotidine 5'-phosphate	1467877711	OC1C(O)C(OC1n1c(=O)[nH]c(=O)cc1C(=O)O)COP(=O)(O)O
(R)-5-Phosphomevalonate	1467877736	OC(=O)CC(CCOP(=O)(O)O)(O)C
5-Amino-2-oxopentanoic acid	1467877777	[O-]C(=O)C(=O)CCC[NH3+]
Oxidized dithiothreitol	1467877870	OC1CSSCC1O
Sphinganine 1-phosphate	1467877881	CCCCCCCCCCCCCCCC(C(COP(=O)([O-])[O-])[N+])O
18-Hydroxycorticosterone	1467877924	OCC(=O)C1CCC2C1(CO)CC(O)C1C2CCC2=CC(=O)CCC12C
4-Hydroxy-2-oxoglutarate	1467877964	OC(C(=O)O)CC(=O)C(=O)O
Pantetheine 4'-phosphate	1467878010	SCCNC(=O)CCNC(=O)C(C(COP(=O)(O)O)(C)C)O
S-Acetyldihydrolipoamide	1467878026	SCCC(SC(=O)C)CCCCC(=O)N
S-Adenosylmethioninamine	1467878037	[N+]CCC[S+](CC1OC(C(C1O)O)n1cnc2c1ncnc2N)C
(R)-5-Diphosphomevalonate	1467878092	OC(=O)CC(CCOP(=O)(OP(=O)(O)O)O)(O)C
(S)-3-Hydroxybutanoyl-CoA	1467878105	CC(CC(=O)SCCNC(=O)CCNC(=O)C(C(COP(=O)(OP(=O)(OCC1OC(C(C1OP(=O)(O)O)O)n1cnc2c1ncnc2N)O)O)(C)C)O)O
4-Trimethylammoniobutanal	1467878141	O=CCCC[N+](C)(C)C
N(pi)-Methyl-L-histidine	1467878165	Cn1cncc1CC(C(=O)O)N
2,3-Bisphospho-D-glycerate	1467878239	OC(=O)C(OP(=O)(O)O)COP(=O)(O)O
3,4-Dihydroxyphenylacetate	1467878253	OC(=O)Cc1ccc(c(c1)O)O
7-Dehydrocholesterol	1467878294	CC(CCCC(C1CCC2C1(C)CCC1C2=CC=C2C1(C)CCC(C2)O)C)C
L-Glutamate 5-semialdehyde	1467878310	O=CCCC(C(=O)[O-])[N+]
S-Succinyldihydrolipoamide	1467878346	SC(CCSC(=O)CCC(=O)O)CCCCC(=O)N
17alpha-Hydroxyprogesterone	1467878411	O=C1CCC2(C(=C1)CCC1C2CCC2(C1CCC2(O)C(=O)C)C)C
Inositol 1-phosphate	1467878427	OC1C(OP(=O)(O)O)C(O)C(C(C1O)O)O
3-(4-Hydroxyphenyl)pyruvate	1467878443	Oc1ccc(cc1)CC(=O)C(=O)O
4-Methylthio-2-oxobutanoic acid	1467878458	CSCCC(=O)C(=O)O
4-Trimethylammoniobutanoate	1467878476	OC(=O)CCC[N+](C)(C)C
Nicotinate D-ribonucleotide	1467878511	OC1C(O)C(OC1[n+]1cccc(c1)C(=O)O)COP(=O)(O)O
3-Hydroxy-2-methylpropanoate	1467878555	OCC(C(=O)O)C
Lathosterol	1467878567	CC(CCCC(C1CCC2C1(C)CCC1C2=CCC2C1(C)CCC(C2)O)C)C
Caffeate	1467878631	OC(=O)C=Cc1ccc(c(c1)O)O
Phytic acid	1467878694	OP(=O)(OC1C(OP(=O)(O)O)C(OP(=O)(O)O)C(C(C1OP(=O)(O)O)OP(=O)(O)O)OP(=O)(O)O)O
(R)-3-Amino-2-methylpropanoate	1467878713	[O-]C(=O)C(C[NH3+])C
N-Methylethanolamine phosphate	1467878747	CNCCOP(=O)(O)O
1D-myo-Inositol 1,4-bisphosphate	1467878856	OC1C(OP(=O)(O)O)C(O)C(C(C1O)OP(=O)(O)O)O
GDP-4-dehydro-6-deoxy-D-mannose	1467878882	OC1C(COP(=O)(OP(=O)(OC2OC(C)C(=O)C(C2O)O)O)O)OC(C1O)n1cnc2c1nc(N)[nH]c2=O
Dehydroepiandrosterone	1467878934	OC1CCC2(C(=CCC3C2CCC2(C3CCC2=O)C)C1)C
3DMET: B01418	1467878978	OC1C(COP(=O)(O)O)OC(C(C1O)O)OP(=O)(O)O
D-Glucono-1,5-lactone 6-phosphate	1467879032	OC1C(COP(=O)(O)O)OC(=O)C(C1O)O
Phosphatidyl-N-methylethanolamine	1467879058	CNCCOP(=O)(OCC(OC(=O)[R])COC(=O)[R])O
S-Aminomethyldihydrolipoylprotein	1467879066	NCSCCC(CCCCC(=O)N[R])S
1D-myo-Inositol 1,3,4-trisphosphate	1467879075	OC1C(OP(=O)(O)O)C(OP(=O)(O)O)C(C(C1O)OP(=O)(O)O)O
Dolichyl beta-D-glucosyl phosphate	1467879115	OCC1OC(OP(=O)(OCCC(CCC=C(CCC=C(CCC=C(CCC=C(C)C)C)C)C)C)O)C(C(C1O)O)O
N-Acetyl-L-glutamate 5-semialdehyde	1467879139	O=CCCC(C(=O)O)NC(=O)C
4-(2-Aminophenyl)-2,4-dioxobutanoate	1467879165	OC(=O)C(=O)CC(=O)c1ccccc1N
(3S)-3-Hydroxy-N6,N6,N6-trimethyl-L-lysine	1467879200	OC(C(C(=O)[O-])[NH3+])CCC[N+](C)(C)C
1D-myo-Inositol 1,3,4,5-tetrakisphosphate	1467879341	OC1C(OP(=O)(O)O)C(OP(=O)(O)O)C(C(C1OP(=O)(O)O)O)OP(=O)(O)O
1D-myo-Inositol 1,3,4,5,6-pentakisphosphate	1467879456	OC1C(OP(=O)(O)O)C(OP(=O)(O)O)C(C(C1OP(=O)(O)O)OP(=O)(O)O)OP(=O)(O)O
N-Acetyl-D-glucosaminylphosphatidylinositol	1467879489	OCC1OC(OC2C(OP(=O)(OCC(OC(=O)[R])COC(=O)[R])O)C(O)C(C(C2O)O)O)C(C(C1O)O)NC(=O)C
3alpha,7alpha,12alpha-Trihydroxy-5beta-cholestan-26-al	1467879615	O=CC(CCCC(C1CCC2C1(C)C(O)CC1C2C(O)CC2C1(C)CCC(C2)O)C)C
N-Acetyl-beta-D-glucosaminyl-(1->3)-N-acetyl-D-galactosaminyl-R	1467879649	OCC1OC(O[R])C(C(C1O)OC1OC(CO)C(C(C1NC(=O)C)O)O)NC(=O)C
4-Deoxy-beta-D-gluc-4-enuronosyl-(1,3)-N-acetyl-D-galactosamine	1467879665	OCC1OC(O)C(C(C1O)OC1OC(=CC(C1O)O)C(=O)O)N=C(O)C
Prostaglandin I2	1467879682	CCCCCC(C=CC1C(O)CC2C1CC(=CCCCC(=O)O)O2)O
Hydrogen cyanide	1467879774	C#N
Cl-	1467879788	Cl
H2O	1467879801	O
Sodium cation	1467879821	[Na+]
Ammonia	1467879874	[NH4+]
dIDP	1467879896	OC1CC(OC1COP(=O)(OP(=O)(O)O)O)n1cnc2c1[nH]cnc2=O
dITP	1467879906	OC1CC(OC1COP(=O)(OP(=O)(OP(=O)(O)O)O)O)n1cnc2c1nc[nH]c2=O
dUDP	1467879916	OC1CC(OC1COP(=O)(OP(=O)(O)O)O)n1ccc(=O)[nH]c1=O
FADH2	1467879956	O=c1[nH]c(=O)c2c([nH]1)n(CC(C(C(COP(=O)(OP(=O)(OCC1OC(C(C1O)O)n1cnc3c1ncnc3N)O)O)O)O)O)c1c([nH]2)cc(c(c1)C)C
HCO3-	1467879966	OC(=O)O
3'-UMP	1467880043	OCC1OC(C(C1OP(=O)(O)O)O)n1ccc(nc1=O)O
Tacrolimus	1467880076	C=CCC1C=C(C)CC(C)CC(OC)C2OC(O)(C(CC2OC)C)C(=O)C(=O)N2C(C(=O)OC(C(C(CC1=O)O)C)C(=CC1CCC(C(C1)OC)O)C)CCCC2
Iodine	1467880119	II
Cocaine	1467880389	COC(=O)C1C(CC2[N+](C1CC2)C)OC(=O)c1ccccc1
Cyanate	1467880404	OC#N
Cys-Gly	1467880428	NC(C(=O)NCC(=O)O)CS
Glutamyl-glutamic acid	1467880480	OC(=O)CCC(C(=O)NC(C(=O)O)CCC(=O)O)N
4-Cresol	1467880753	Cc1ccc(cc1)O
Nigerose	1467881193	OCC1OC(O)C(C(C1O)OC1OC(CO)C(C(C1O)O)O)O
Octadecanoic acid	1467881276	CCCCCCCCCCCCCCCCCC(=O)O
Allantoin	1467881440	NC(=O)NC1NC(=O)NC1=O
Calcidiol	1467881533	OC1CCC(=C)C(=CC=C2CCCC3(C2CCC3C(CCCC(O)(C)C)C)C)C1
Decanoic acid	1467881636	CCCCCCCCCC(=O)O
Hexanoic acid	1467881737	CCCCCC(=O)O
Hippurate	1467881755	O=C(c1ccccc1)NCC(=O)O
Ibuprofen	1467881770	CC(Cc1ccc(cc1)C(C(=O)O)C)C
Linoleate	1467881851	CCCCCC=CCC=CCCCCCCCC(=O)O
Melatonin	1467881882	COc1ccc2c(c1)c(CCNC(=O)C)c[nH]2
Nonanoic acid	1467881906	CCCCCCCCC(=O)O
Phytanate	1467881967	CC(CCCC(CC(=O)O)C)CCCC(CCCC(C)C)C
Threonate	1467882096	OCC(C(C(=O)O)O)O
Calcitriol	1467882454	OC1CC(O)C(=C)C(=CC=C2CCCC3(C2CCC3C(CCCC(O)(C)C)C)C)C1
Chitobiose	1467882468	OCC1OC(O)C(C(C1OC1OC(CO)C(C(C1NC(=O)C)O)O)O)NC(=O)C
Cysteamine	1467882503	SCC[NH3+]
L-Dopachrome	1467882634	OC(=O)C1NC2=CC(=O)C(=O)C=C2C1
4-Hydroxy-2-quinolinecarboxylic acid	1467882865	OC(=O)c1cc(O)c2c(n1)cccc2
Lanosterol	1467882950	CC(=CCCC(C1CCC2(C1(C)CCC1=C2CCC2C1(C)CCC(C2(C)C)O)C)C)C
Mesaconate	1467883030	OC(=O)C=C(C(=O)O)C
Psychosine	1467883185	CCCCCCCCCCCCCC=CC(C(COC1OC(CO)C(C(C1O)O)O)[N+])O
Thiocyanate	1467883279	SC#N
Xanthosine	1467883352	OCC1OC(C(C1O)O)n1cnc2c1[nH]c(=O)[nH]c2=O
trans-2-Hydroxycinnamate	1467883476	OC(=O)C=Cc1ccccc1O
Aldosterone	1467883530	OCC(=O)C1CCC2C1(C=O)CC(O)C1C2CCC2=CC(=O)CCC12C
Choloyl-CoA	1467883641	OC1CCC2(C(C1)CC(C1C2CC(O)C2(C1CCC2C(CCC(=O)SCCNC(=O)CCNC(=O)C(C(COP(=O)(OP(=O)(OCC1OC(C(C1OP(=O)(O)O)O)n1cnc2c1ncnc2N)O)O)(C)C)O)C)C)O)C
Deoxyribose	1467883705	OCC1OC(CC1O)O
Desmosterol	1467883721	OC1CCC2(C(=CCC3C2CCC2(C3CCC2C(CCC=C(C)C)C)C)C1)C
Glucomannan	1467883757	OCC1OC(OC2C(CO)OC(C(C2O)O)O)C(C(C1OC1OC(CO)C(C(C1O)O)OC1OC(CO)C(C(C1O)O)O)O)O
L-Homocystine	1467883803	[N+]C(C(=O)[O-])CCSSCCC(C(=O)[O-])[N+]
Thyroxine	1467883902	OC(=O)C(Cc1cc(I)c(c(c1)I)Oc1cc(I)c(c(c1)I)O)N
Lauroyl-CoA	1467883918	CCCCCCCCCCCC(=O)SCCNC(=O)CCNC(=O)C(C(COP(=O)(OP(=O)(OCC1OC(C(C1OP(=O)(O)O)O)n1cnc2c1ncnc2N)O)O)(C)C)O
Polyproline	1467884033	OC(=O)C1CCCN1C(=O)C1CCCN1C(=O)C1CCCN1
Pravastatin	1467884040	CCC(C(=O)OC1CC(O)C=C2C1C(CCC(CC(CC(=O)O)O)O)C(C=C2)C)C
5-Oxoproline	1467884369	O=C1CCC(N1)C(=O)O
1-Acylglycerol	1467884438	OC(CO)COC(=O)[R]
Aminoacetone	1467884457	CC(=O)C[N+]
Glycocholate	1467884711	OC1CCC2(C(C1)CC(C1C2CC(O)C2(C1CCC2C(CCC(=O)NCC(=O)O)C)C)O)C
Maltohexaose	1467884861	OCC1OC(OC2C(CO)OC(C(C2O)O)OC2C(CO)OC(C(C2O)O)O)C(C(C1OC1OC(CO)C(C(C1O)O)OC1OC(CO)C(C(C1O)O)OC1OC(CO)C(C(C1O)O)O)O)O
Nonanoyl-CoA	1467884907	CCCCCCCCC(=O)SCCNC(=O)CCNC(=O)C(C(COP(=O)(OP(=O)(OCC1OC(C(C1OP(=O)(O)O)O)n1cnc2c1ncnc2N)O)O)(C)C)O
Octanoyl-CoA	1467884933	CCCCCCCC(=O)SCCNC(=O)CCNC(=O)C(C(COP(=O)(OP(=O)(OCC1OC(C(C1OP(=O)(O)O)O)n1cnc2c1ncnc2N)O)O)(C)C)O
Pregnenolone	1467885032	OC1CCC2(C(=CCC3C2CCC2(C3CCC2C(=O)C)C)C1)C
Steryl ester	1467885071	[R]C(=O)OC1CCC2C(C1)CCC1C2CCC2C1CCC2
Thiocysteine	1467885109	[O-]C(=O)C([N+])CSS
Acetylcholine	1467885359	CC(=O)OCC[N+](C)(C)C
D-Erythrulose	1467885566	OCC(=O)C(CO)O
Glycylglycine	1467885690	NCC(=O)NCC(=O)O
Eicosanoyl-CoA	1467885719	CCCCCCCCCCCCCCCCCCCC(=O)SCCNC(=O)CCNC(=O)C(C(COP(=O)(OP(=O)(OCC1OC(C(C1OP(=O)(O)O)O)n1cnc2c1ncnc2N)O)O)(C)C)O
Linoleoyl-CoA	1467885799	CCCCCC=CCC=CCCCCCCCC(=O)SCCN=C(CCN=C(C(C(COP(=O)(OP(=O)(OCC1OC(C(C1OP(=O)(O)O)O)n1cnc2c1ncnc2N)O)O)(C)C)O)O)O
Lipoylprotein	1467885810	[R]NC(=O)CCCCC1CCSS1
Phylloquinone	1467885861	CC(CCCC(CCCC(C)C)C)CCCC(=CCC1=C(C)C(=O)c2c(C1=O)cccc2)C
Phytanoyl-CoA	1467885878	CC(CC(=O)SCCNC(=O)CCNC(=O)C(C(COP(=O)(OP(=O)(OCC1OC(C(C1OP(=O)(O)O)O)n1cnc2c1ncnc2N)O)O)(C)C)O)CCCC(CCCC(CCCC(C)C)C)C
beta-Carotene	1467886150	CC(=CC=CC=C(C=CC=C(C=CC1=C(C)CCCC1(C)C)C)C)C=CC=C(C=CC1=C(C)CCCC1(C)C)C
Glucomannan longer by one mannose unit	1467886210	OCC1OC(OC2C(CO)OC(C(C2O)O)OC2C(CO)OC(C(C2O)O)O)C(C(C1OC1OC(CO)C(C(C1O)O)OC1OC(CO)C(C(C1O)O)O)O)O
Corticosterone	1467886548	OCC(=O)C1CCC2C1(C)CC(O)C1C2CCC2=CC(=O)CCC12C
Dihydrolipoate	1467886607	SCCC(CCCCC(=O)O)S
Glycyl-leucine	1467886667	NCC(=O)NC(C(=O)O)CC(C)C
Leukotriene B4	1467886730	CCCCCC=CCC(C=CC=CC=CC(CCCC(=O)O)O)O
Leukotriene C4	1467886747	CCCCCC=CCC=CC=CC=CC(C(CCCC(=O)O)O)SCC(C(=O)NCC(=O)O)NC(=O)CCC(C(=O)O)N
Methylmalonate	1467886786	CC(C(=O)O)C(=O)[O-]
Protein lysine	1467886897	NCCCCC(C(=O)N[R])NC(=O)[R]
Protoporphyrin	1467886913	C=CC1=C(C)C2=Cc3[nH]c(c(c3C=C)C)C=C3N=C(C=c4[nH]c(=CC1=N2)c(C)c4CCC(=O)O)C(=C3C)CCC(=O)O
Thromboxane A2	1467886964	CCCCCC(C=CC1OC2CC(C1CC=CCCCC(=O)O)O2)O
(E)-Glutaconate	1467887120	OC(=O)CC=CC(=O)O
Dehydroalanine	1467887158	NC(=C)C(=O)O
2-Aminomuconate	1467887172	OC(=O)C=CC=C(C(=O)O)N
2-Methylcitrate	1467887229	OC(=O)CC(C(C(=O)O)C)(C(=O)O)O
4-Nitrocatechol	1467887324	[O-][N+](=O)c1ccc(c(c1)O)O
Arachidonyl-CoA	1467887441	CCCCCC=CCC=CCC=CCC=CCCCC(=O)SCCNC(=O)CCNC(=O)C(C(COP(=O)(OP(=O)(OCC1OC(C(C1OP(=O)(O)O)O)n1cnc2c1ncnc2N)O)O)(C)C)O
D-2-Aminobutyrate	1467887498	[O-]C(=O)C([NH3+])CC
Phosphocreatine	1467887879	[O-]C(=O)CN(C(=[N+])NP(=O)([O-])[O-])C
2',3'-Cyclic UMP	1467888259	OCC1OC(C2C1OP(=O)(O2)O)n1ccc(=O)[nH]c1=O
2-Hydroxyadipate	1467888307	OC(=O)CCCC(C(=O)O)O
4-Methylpentanal	1467888416	O=CCCC(C)C
Glutaconyl-1-CoA	1467888647	O=C(NCCSC(=O)C=CCC(=O)O)CCNC(=O)C(C(COP(=O)(OP(=O)(OCC1OC(C(C1OP(=O)(O)O)O)n1cnc2c1ncnc2N)O)O)(C)C)O
L-Homocitrulline	1467888735	NC(=O)NCCCCC(C(=O)[O-])[N+]
N-Methyltyramine	1467888802	Oc1ccc(cc1)CC[N+]C
Pent-2-enoyl-CoA	1467888846	CCC=CC(=O)SCCNC(=O)CCNC(=O)C(C(COP(=O)(OP(=O)(OCC1OC(C(C1OP(=O)(O)O)O)n1cnc2c1ncnc2N)O)O)(C)C)O
Perillyl alcohol	1467888856	OCC1=CCC(CC1)C(=C)C
Triiodothyronine	1467888960	OC(=O)C(Cc1cc(I)c(c(c1)I)Oc1ccc(c(c1)I)O)N
Xanthurenic acid	1467889008	[O-]C(=O)c1cc([O-])c2c(n1)c(O)ccc2
alpha-Tocopherol	1467889075	CC(CCCC1(C)CCc2c(O1)c(C)c(c(c2C)O)C)CCCC(CCCC(C)C)C
gamma-Tocopherol	1467889125	CC(CCCC(CCCC(C)C)C)CCCC1(C)CCc2c(O1)c(C)c(c(c2)O)C
2-Phenylacetamide	1467889339	NC(=O)Cc1ccccc1
3-Cyano-L-alanine	1467889381	[O-]C(=O)C([NH3+])CC#N
3-Iodo-L-tyrosine	1467889417	[O-]C(=O)C(Cc1ccc(c(c1)I)O)[N+]
Chenodeoxycholate	1467889527	OC1CCC2(C(C1)CC(C1C2CCC2(C1CCC2C(CCC(=O)O)C)C)O)C
Cholesterol ester	1467889544	CC(CCCC(C1CCC2C1(C)CCC1C2CC=C2C1(C)CCC(C2)OC(=O)[R])C)C
Estrone 3-sulfate	1467889611	O=C1CCC2C1(C)CCC1C2CCc2c1ccc(c2)OS(=O)(=O)O
N1-Acetylspermine	1467889755	[N+]CCC[N+]CCCC[N+]CCCNC(=O)C
O-Acetylcarnitine	1467889778	OC(=O)CC(C[N+](C)(C)C)OC(=O)C
Perillyl aldehyde	1467889823	O=CC1=CCC(CC1)C(=C)C
Retinyl palmitate	1467889896	CCCCCCCCCCCCCCCC(=O)OCC=C(C=CC=C(C=CC1=C(C)CCCC1(C)C)C)C
Taurolithocholate	1467889939	OC1CCC2(C(C1)CCC1C2CCC2(C1CCC2C(CCC(=O)NCCS(=O)(=O)O)C)C)C
Tetradecanoyl-CoA	1467889952	CCCCCCCCCCCCCC(=O)SCCNC(=O)CCNC(=O)C(C(COP(=O)(OP(=O)(OCC1OC(C(C1OP(=O)(O)O)O)n1cnc2c1ncnc2N)O)O)(C)C)O
3-Ureidopropionate	1467890295	OC(=O)CCNC(=O)N
D-Glucuronolactone	1467890488	O=CC(C1OC(=O)C(C1O)O)O
Dodecanedioic acid	1467890562	OC(=O)CCCCCCCCCCC(=O)O
Dodecanoic acid	1467890574	CCCCCCCCCCCC(=O)O
L-Formylkynurenine	1467890695	O=CNc1ccccc1C(=O)CC(C(=O)O)N
N-Acetyl-L-leucine	1467890765	CC(CC(C(=O)O)NC(=O)C)C
N-Acetylmethionine	1467890786	CSCCC(C(=O)O)NC(=O)C
N-Acetylputrescine	1467890812	NCCCCN=C(O)C
N-Methylputrescine	1467890895	C[N+]CCCC[N+]
Phosphatidylserine	1467891011	[R]C(=O)OC(COP(=O)(OCC(C(=O)O)N)O)COC(=O)[R]
Psychosine sulfate	1467891070	CCCCCCCCCCCCCC=CC(C(COC1OC(COS(=O)(=O)[O-])C(C(C1O)O)O)[N+])O
alpha-Pinene-oxide	1467891151	CC1(C)C2CC3C(C1C2)(C)O3
10-Hydroxydecanoic acid	1467891251	OCCCCCCCCCC(=O)O
3-Hydroxykynurenine	1467891430	[O-]C(=O)C([N+])CC(=O)c1cccc(c1N)O
Imidazole-4-acetate	1467891732	OC(=O)Cc1cnc[nH]1
L-Octanoylcarnitine	1467891757	CCCCCCCC(=O)OC(C[N+](C)(C)C)CC(=O)[O-]
O-Butanoylcarnitine	1467891893	CCCC(=O)OC(C[N+](C)(C)C)CC(=O)[O-]
Sorbose 1-phosphate	1467892046	OCC(C(C(C(=O)COP(=O)(O)O)O)O)O
(S)-Norlaudanosoline	1467892230	Oc1cc(ccc1O)CC1NCCc2c1cc(O)c(c2)O
1-Methylnicotinamide	1467892254	C[n+]1cccc(c1)C(=O)N
3-Dehydrosphinganine	1467892402	CCCCCCCCCCCCCCCC(=O)C(CO)[N+]
3-Methylbutanoyl-CoA	1467892444	CC(CC(=O)SCCNC(=O)CCNC(=O)C(C(COP(=O)(OP(=O)(OCC1OC(C(C1OP(=O)(O)O)O)n1cnc2c1ncnc2N)O)O)(C)C)O)C
3-cis-Dodecenoyl-CoA	1467892493	CCCCCCCCC=CCC(=O)SCCNC(=O)CCNC(=O)C(C(COP(=O)(OP(=O)(OCC1OC(C(C1OP(=O)(O)O)O)n1cnc2c1ncnc2N)O)O)(C)C)O
4-Acetamidobutanoate	1467892516	OC(=O)CCCN=C(O)C
4-Hydroxybenzoyl-CoA	1467892552	OC1C(OP(=O)(O)O)C(OC1n1cnc2c1ncnc2N)COP(=O)(OP(=O)(OCC(C(C(=NCCC(=NCCSC(=O)c1ccc(cc1)O)O)O)O)(C)C)O)O
7,8-Dihydrobiopterin	1467892581	CC(C(C1=Nc2c(NC1)nc([nH]c2=O)N)O)O
Glycerol 2-phosphate	1467892727	OCC(OP(=O)(O)O)CO
L-Fucose 1-phosphate	1467892784	OC1C(OC(C(C1O)O)C)OP(=O)(O)O
L-Palmitoylcarnitine	1467892829	CCCCCCCCCCCCCCCC(=O)OC(C[N+](C)(C)C)CC(=O)[O-]
Maltose 6'-phosphate	1467892879	OCC1OC(O)C(C(C1OC1OC(COP(=O)(O)O)C(C(C1O)O)O)O)O
O-Propanoylcarnitine	1467893048	CCC(=O)OC(C[N+](C)(C)C)CC(=O)[O-]
Protein asparagine	1467893076	[R]NC(=O)C(NC(=O)[R])CC(=O)N
Thiamin triphosphate	1467893118	Cc1ncc(c(n1)N)C[n+]1csc(c1C)CCOP(=O)(OP(=O)(OP(=O)([O-])[O-])[O-])[O-]
gamma-Linolenoyl-CoA	1467893192	CCCCCC=CCC=CCC=CCCCCC(=O)SCCNC(=O)CCNC(=O)C(C(COP(=O)(OP(=O)(OCC1OC(C(C1OP(=O)(O)O)O)n1cnc2c1ncnc2N)O)O)(C)C)O
17beta-Hydroxysteroid	1467893339	OC1CCC2(C(C1)CCC1C2CCC2(C1CCC2O)C)C
3-Methylcrotonyl-CoA	1467893475	O=C(NCCSC(=O)C=C(C)C)CCNC(=O)C(C(COP(=O)(OP(=O)(OCC1OC(C(C1OP(=O)(O)O)O)n1cnc2c1ncnc2N)O)O)(C)C)O
4-Hydroxy-L-glutamate	1467893562	OC(=O)C(CC(C(=O)O)O)N
5-Phosphoribosylamine	1467893667	OC1C(COP(=O)([O-])[O-])OC(C1O)[N+]
Nicotinamide-beta-riboside	1467894077	OCC1OC(C(C1O)O)[n+]1cccc(c1)C(=O)N
dTDP-6-deoxy-beta-L-talose	1467894335	OC1CC(OC1COP(=O)(OP(=O)(OC1OC(C)C(C(C1O)O)O)O)O)n1cc(C)c(=O)[nH]c1=O
11-Deoxycorticosterone	1467894500	OCC(=O)C1CCC2C1(C)CCC1C2CCC2=CC(=O)CCC12C
2-Amino-3-oxobutanoate	1467894577	NC(C(=O)O)C(=O)C
2-trans-Dodecenoyl-CoA	1467894642	CCCCCCCCCC=CC(=O)SCCNC(=O)CCNC(=O)C(C(COP(=O)(OP(=O)(OCC1OC(C(C1OP(=O)(O)O)O)n1cnc2c1ncnc2N)O)O)(C)C)O
3-Methylglutaconyl-CoA	1467894732	O=C(NCCSC(=O)C=C(CC(=O)O)C)CCNC(=O)C(C(COP(=O)(OP(=O)(OCC1OC(C(C1OP(=O)(O)O)O)n1cnc2c1ncnc2N)O)O)(C)C)O
3-Phosphonooxypyruvate	1467894744	OC(=O)C(=O)COP(=O)(O)O
6-Amino-2-oxohexanoate	1467894805	NCCCCC(=O)C(=O)O
Dihomo-gamma-linolenate	1467894840	CCCCCC=CCC=CCC=CCCCCCCC(=O)O
Coproporphyrinogen III	1467894939	OC(=O)CCc1c2Cc3[nH]c(c(c3C)CCC(=O)O)Cc3[nH]c(Cc4[nH]c(Cc(c1C)[nH]2)c(CCC(=O)O)c4C)c(c3CCC(=O)O)C
(R)-2-Hydroxyisocaproate	1467894952	OC(C(=O)O)CC(C)C
L-Glutamyl 5-phosphate	1467895085	O=C(OP(=O)([O-])[O-])CCC(C(=O)[O-])[NH3+]
O-Decanoyl-L-carnitine	1467895184	CCCCCCCCCC(=O)OC(C[N+](C)(C)C)CC(=O)[O-]
2-Methylacetoacetyl-CoA	1467895458	O=C(NCCSC(=O)C(C(=O)C)C)CCNC(=O)C(C(COP(=O)(OP(=O)(OCC1OC(C(C1OP(=O)(O)O)O)n1cnc2c1ncnc2N)O)O)(C)C)O
2-Methylbut-2-enoyl-CoA	1467895469	CC=C(C(=O)SCCNC(=O)CCNC(=O)C(C(COP(=O)(OP(=O)(OCC1OC(C(C1OP(=O)(O)O)O)n1cnc2c1ncnc2N)O)O)(C)C)O)C
4-Nitrophenyl phosphate	1467895584	O=N(=O)c1ccc(cc1)OP(=O)(O)O
5-Phosphooxy-L-lysine	1467895621	[N+]CC(OP(=O)([O-])[O-])CCC(C(=O)[O-])[N+]
6-alpha-Maltosylglucose	1467895633	OCC1OC(OCC2OC(O)C(C(C2O)O)O)C(C(C1OC1OC(CO)C(C(C1O)O)O)O)O
Aminoimidazole ribotide	1467895667	OC1C(COP(=O)(O)O)OC(C1O)n1cncc1N
Bilirubin-glucuronoside	1467895683	C=CC1=C(C)C(=O)NC1=Cc1[nH]c(c(c1C)CCC(=O)OC1OC(C(=O)[O-])C(C(C1O)O)O)Cc1[nH]c(c(c1CCC(=O)[O-])C)C=C1NC(=O)C(=C1C)C=C
N-(L-Arginino)succinate	1467895842	N=C(NC(C(=O)O)CC(=O)O)NCCCC(C(=O)O)N
N-Glycoloyl-neuraminate	1467895879	OCC(=O)NC1C(O)CC(OC1C(C(CO)O)O)(O)C(=O)O
N1,N12-Diacetylspermine	1467895906	CC(=O)NCCC[N+]CCCC[N+]CCCNC(=O)C
Presqualene diphosphate	1467896011	CC(=CCCC(=CC1C(C1(C)CCC=C(CCC=C(C)C)C)COP(=O)(OP(=O)(O)O)O)C)CCC=C(C)C
(R)-S-Lactoylglutathione	1467896139	O=C(NC(C(=O)NCC(=O)[O-])CSC(=O)C(O)C)CCC(C(=O)[O-])[N+]
2-Methylprop-2-enoyl-CoA	1467896214	O=C(NCCSC(=O)C(=C)C)CCNC(=O)C(C(COP(=O)(OP(=O)(OCC1OC(C(C1OP(=O)(O)O)O)n1cnc2c1ncnc2N)O)O)(C)C)O
Folinic acid	1467896342	O=CN1C(CNc2ccc(cc2)C(=O)NC(C(=O)O)CCC(=O)O)CNc2c1c(=O)nc([nH]2)N
D-4'-Phosphopantothenate	1467896394	OC(=O)CCNC(=O)C(C(COP(=O)(O)O)(C)C)O
2-Aminoethylphosphonate	1467896799	NCCP(=O)(O)O
1-Pyrroline-2-carboxylate	1467896824	[O-]C(=O)C1=NCCC1
20-Hydroxyleukotriene E4	1467896955	OCCCCCC=CCC=CC=CC=CC(C(CCCC(=O)O)O)SCC(C(=O)O)N
7alpha-Hydroxycholesterol	1467897107	CC(CCCC(C1CCC2C1(C)CCC1C2C(O)C=C2C1(C)CCC(C2)O)C)C
8,11,14-Eicosatrienoyl-CoA	1467897121	CCCCCC=CCC=CCC=CCCCCCCC(=O)SCCN=C(CCN=C(C(C(COP(=O)(OP(=O)(OCC1OC(C(C1OP(=O)(O)O)O)n1cnc2c1ncnc2N)O)O)(C)C)O)O)O
Sphingosyl-phosphocholine	1467897398	CCCCCCCCCCCCCC=CC(C(COP(=O)(OCC[N+](C)(C)C)O)N)O
Taurolithocholate sulfate	1467897419	O=C(CCC(C1CCC2C1(C)CCC1C2CCC2C1(C)CCC(C2)OS(=O)(=O)O)C)NCCS(=O)(=O)O
3-(4-Hydroxyphenyl)lactate	1467897666	OC(=O)C(Cc1ccc(cc1)O)O
4-Imidazolone-5-propanoate	1467897743	[O-]C(=O)CCC1NC=NC1=O
5alpha-Pregnane-3,20-dione	1467897755	O=C1CCC2(C(C1)CCC1C2CCC2(C1CCC2C(=O)C)C)C
6-Pyruvoyltetrahydropterin	1467897789	CC(=O)C(=O)C1CNc2c(N1)c(=O)[nH]c(n2)N
Histone N6-methyl-L-lysine	1467897894	CNCCCCC(C(=O)N[R])NC(=O)[R]
Quinolinate	1467898015	OC(=O)c1ncccc1C(=O)O
gamma-L-Glutamyl-D-alanine	1467898142	O=C(NC(C(=O)[O-])C)CCC(C(=O)[O-])[N+]
11alpha-Hydroxyprogesterone	1467898206	O=C1CCC2(C(=C1)CCC1C2C(O)CC2(C1CCC2C(=O)C)C)C
Dopamine	1467898292	[N+]CCc1ccc(c(c1)O)O
3-Hydroxy-3-methylglutarate	1467898309	OC(=O)CC(CC(=O)O)(O)C
4-Hydroxyphenylacetaldehyde	1467898352	O=CCc1ccc(cc1)O
5-Guanidino-2-oxopentanoate	1467898395	NC(=N)NCCCC(=O)C(=O)[O-]
N6,N6,N6-Trimethyl-L-lysine	1467898521	[O-]C(=O)C(CCCC[N+](C)(C)C)N
N6-(1,2-Dicarboxyethyl)-AMP	1467898532	OC(=O)CC(C(=O)O)Nc1ncnc2c1ncn2C1OC(C(C1O)O)COP(=O)(O)O
2-Aminomuconate semialdehyde	1467898700	O=CC=CC=C(C(=O)O)N
5'-Phosphoribosylglycinamide	1467898800	[N+]CC(=O)NC1OC(C(C1O)O)COP(=O)([O-])[O-]
5alpha-Cholest-8-en-3beta-ol	1467898851	CC(CCCC(C1CCC2C1(C)CCC1=C2CCC2C1(C)CCC(C2)O)C)C
(S)-1-Pyrroline-5-carboxylate	1467899307	OC(=O)C1CCC=N1
1-Oleoylglycerophosphocholine	1467899329	CCCCCCCCC=CCCCCCCCC(=O)OCC(COP(=O)(OCC[N+](C)(C)C)O)O
Dihydrotestosterone	1467899341	O=C1CCC2(C(C1)CCC1C2CCC2(C1CCC2O)C)C
Thyrotropin-releasing hormone	1467899616	O=C1CCC(N1)C(=O)NC(C(=O)N1CCCC1C(=O)N)Cc1[nH]cnc1
1-Aminocyclopentanecarboxylate	1467899694	OC(=O)C1(N)CCCC1
Lithocholic acid	1467899834	OC1CCC2(C(C1)CCC1C2CCC2(C1CCC2C(CCC(=O)O)C)C)C
1-Phospho-alpha-D-galacturonate	1467900146	OC1C(O)C(OC(C1O)C(=O)O)OP(=O)(O)O
20alpha-Hydroxy-4-pregnen-3-one	1467900170	O=C1CCC2(C(=C1)CCC1C2CCC2(C1CCC2C(O)C)C)C
3,4-Dihydroxyphenylacetaldehyde	1467900185	O=CCc1ccc(c(c1)O)O
3-Hydroxy-2-methylpropanoyl-CoA	1467900231	OCC(C(=O)SCCNC(=O)CCNC(=O)C(C(COP(=O)(OP(=O)(OCC1OC(C(C1OP(=O)(O)O)O)n1cnc2c1ncnc2N)O)O)(C)C)O)C
D-myo-Inositol 1,3-bisphosphate	1467900333	OC1C(OP(=O)(O)O)C(O)C(C(C1OP(=O)(O)O)O)O
D-myo-Inositol 3,4-bisphosphate	1467900348	OC1C(OP(=O)(O)O)C(OP(=O)(O)O)C(C(C1O)O)O
L-2-Aminoadipate 6-semialdehyde	1467900456	O=CCCCC(C(=O)O)N
N-((R)-Pantothenoyl)-L-cysteine	1467900482	SCC(C(=O)O)NC(=O)CCNC(=O)C(C(CO)(C)C)O
Delta1-Piperideine-2-carboxylate	1467900581	[O-]C(=O)C1=[NH+]CCCC1
1-Linoleoylglycerophosphocholine	1467900620	CCCCCC=CCC=CCCCCCCCC(=O)OCC(COP(=O)(OCC[N+](C)(C)C)O)O
1-Palmitoylglycerophosphocholine	1467900641	CCCCCCCCCCCCCCCC(=O)OCC(COP(=O)(OCC[N+](C)(C)C)O)O
N-Acetyl-L-glutamate 5-phosphate	1467900875	CC(=O)NC(C(=O)O)CCC(=O)OP(=O)(O)O
Phenylacetylglutamine	1467901007	O=C(Cc1ccccc1)NC(C(=O)O)CCC(=O)N
5,6-Dihydroxyindole-2-carboxylate	1467901209	Oc1cc2[nH]c(cc2cc1O)C(=O)O
S-Methyl-5-thio-D-ribose 1-phosphate	1467901239	CSCC1OC(C(C1O)O)OP(=O)(O)O
all-trans-Pentaprenyl diphosphate	1467901451	CC(=CCCC(=CCOP(=O)(OP(=O)(O)O)O)C)CCC=C(CCC=C(CCC=C(C)C)C)C
(Z)-But-2-ene-1,2,3-tricarboxylate	1467901504	OC(=O)CC(=C(C(=O)O)C)C(=O)O
1-Acyl-sn-glycero-3-phosphocholine	1467901553	OC(COP(=O)(OCC[N+](C)(C)C)O)COC(=O)[R]
6-Lactoyl-5,6,7,8-tetrahydropterin	1467901642	O=C(C1CNc2c(N1)c(=O)[nH]c(n2)N)C(O)C
N-Acetyl-D-glucosamine 1-phosphate	1467901708	OCC1OC(OP(=O)(O)O)C(C(C1O)O)NC(=O)C
L-1-Pyrroline-3-hydroxy-5-carboxylate	1467901893	OC1C=NC(C1)C(=O)O
Androstenediol	1467902019	OC1CCC2(C(=CCC3C2CCC2(C3CCC2O)C)C1)C
Estradiol-17alpha 3-D-glucuronoside	1467902065	OC1C(O)C(Oc2ccc3c(c2)CCC2C3CCC3(C2CCC3O)C)OC(C1O)C(=O)O
Phosphatidyl-N-dimethylethanolamine	1467902124	CN(CCOP(=O)(OCC(OC(=O)[R])COC(=O)[R])O)C
(R)-4'-Phosphopantothenoyl-L-cysteine	1467902426	SCC(C(=O)O)NC(=O)CCNC(=O)C(C(COP(=O)(O)O)(C)C)O
5'-Phosphoribosyl-N-formylglycinamide	1467902561	O=CNCC(=O)NC1OC(C(C1O)O)COP(=O)(O)O
(2S,3S)-3-Hydroxy-2-methylbutanoyl-CoA	1467902742	O=C(NCCSC(=O)C(C(O)C)C)CCNC(=O)C(C(COP(=O)(OP(=O)(OCC1OC(C(C1OP(=O)(O)O)O)n1cnc2c1ncnc2N)O)O)(C)C)O
2-Amino-3-carboxymuconate semialdehyde	1467902754	O=CC=CC(=C(C(=O)O)N)C(=O)O
S-(2-Methylpropanoyl)-dihydrolipoamide	1467902864	SC(CCSC(=O)C(C)C)CCCCC(=O)N
1D-myo-Inositol 1,3,4,6-tetrakisphosphate	1467903218	OC1C(OP(=O)(O)O)C(OP(=O)(O)O)C(C(C1OP(=O)(O)O)OP(=O)(O)O)O
Deoxycholic acid	1467903271	OC1CCC2(C(C1)CCC1C2CC(O)C2(C1CCC2C(CCC(=O)O)C)C)C
di-trans,poly-cis-Decaprenyl diphosphate	1467903462	CC(=CCCC(=CCCC(=CCCC(=CCCC(=CCOP(=O)(OP(=O)(O)O)O)C)C)C)C)CCC=C(CCC=C(CCC=C(CCC=C(CCC=C(C)C)C)C)C)C
1D-myo-Inositol 3,4,5,6-tetrakisphosphate	1467903545	OC1C(OP(=O)(O)O)C(OP(=O)(O)O)C(C(C1O)OP(=O)(O)O)OP(=O)(O)O
1-Phosphatidyl-1D-myo-inositol 3-phosphate	1467903779	[R]C(=O)OC(COP(=O)(OC1C(O)C(O)C(C(C1O)OP(=O)(O)O)O)O)COC(=O)[R]
3alpha,7alpha-Dihydroxy-5beta-cholestanate	1467903809	OC1CCC2(C(C1)CC(C1C2CCC2(C1CCC2C(CCCC(C(=O)O)C)C)C)O)C
Dehydroepiandrosterone sulfate	1467903822	O=C1CCC2C1(C)CCC1C2CC=C2C1(C)CCC(C2)OS(=O)(=O)O
(4R,5S)-4,5,6-Trihydroxy-2,3-dioxohexanoate	1467903963	OCC(C(C(=O)C(=O)C(=O)O)O)O
S-Methyl-5-thio-D-ribulose 1-phosphate	1467904052	CSCC(C(C(=O)COP(=O)(O)O)O)O
(2S,3R)-3-Hydroxybutane-1,2,3-tricarboxylate	1467904131	OC(=O)CC(C(C(=O)O)(O)C)C(=O)O
1-Phosphatidyl-D-myo-inositol 4,5-bisphosphate	1467904440	[R]C(=O)OC(COP(=O)(OC1C(O)C(O)C(C(C1O)OP(=O)(O)O)OP(=O)(O)O)O)COC(=O)[R]
2-(Formamido)-N1-(5'-phosphoribosyl)acetamidine	1467904471	O=CNCC(=N)NC1OC(C(C1O)O)COP(=O)(O)O
3alpha,7alpha-Dihydroxy-5beta-cholestanoyl-CoA	1467904514	OC1CCC2(C(C1)CC(C1C2CCC2(C1CCC2C(CCCC(C(=O)SCCN=C(CCN=C(C(C(COP(=O)(OP(=O)(OCC1OC(C(C1OP(=O)(O)O)O)n1cnc2c1ncnc2N)O)O)(C)C)O)O)O)C)C)C)O)C
(13E)-11alpha-Hydroxy-9,15-dioxoprost-13-enoate	1467904585	CCCCCC(=O)C=CC1C(O)CC(=O)C1CCCCCCC(=O)O
1-(5'-Phosphoribosyl)-5-amino-4-imidazolecarboxamide	1467904765	OC1C(O)C(OC1n1cnc(c1N)C(=O)N)COP(=O)(O)O
(13E)-(15S)-15-Hydroxy-9-oxoprosta-10,13-dienoate	1467904838	CCCCCC(C=CC1C=CC(=O)C1CCCCCCC(=O)O)O
(13E)-(15S)-15-Hydroxy-9-oxoprosta-11,13-dienoate	1467904854	CCCCCC(C=CC1=CCC(=O)C1CCCCCCC(=O)O)O
(9Z,11E)-(13S)-13-Hydroperoxyoctadeca-9,11-dienoic acid	1467905067	CCCCCC(C=CC=CCCCCCCCC(=O)O)OO
3alpha,7alpha,12alpha-Trihydroxy-5beta-cholestanoate	1467905117	OC1CCC2(C(C1)CC(C1C2CC(O)C2(C1CCC2C(CCCC(C(=O)O)C)C)C)O)C
GM3	1467905187	CCCCCCCCCCCCCC=CC(C(NC(=O)[R])COC1OC(CO)C(C(C1O)O)OC1OC(CO)C(C(C1O)OC1(CC(O)C(C(O1)C(C(CO)O)O)NC(=O)C)C(=O)O)O)O
1-(5'-Phosphoribosyl)-5-formamido-4-imidazolecarboxamide	1467905230	O=CNc1c(ncn1C1OC(C(C1O)O)COP(=O)(O)O)C(=O)N
Alprostadil	1467905301	CCCCCC(C=CC1C(O)CC(=O)C1CCCCCCC(=O)O)O
1-(5-Phospho-D-ribosyl)-5-amino-4-imidazolecarboxylate	1467905379	OC1C(O)C(OC1n1c[nH+]c(c1N)C(=O)[O-])COP(=O)([O-])[O-]
3alpha,7alpha,12alpha-Trihydroxy-5beta-cholestanoyl-CoA	1467905439	OC1CCC2(C(C1)CC(C1C2CC(O)C2(C1CCC2C(CCCC(C(=O)SCCN=C(CCN=C(C(C(COP(=O)(OP(=O)(OCC1OC(C(C1OP(=O)(O)O)O)n1cnc2c1ncnc2N)O)O)(C)C)O)O)O)C)C)C)O)C
5(S)-HETE	1467905712	CCCCCC=CCC=CCC=CC=CC(CCCC(=O)O)O
8(R)-HPETE	1467905840	CCCCCC=CCC=CC=CC(CC=CCCCC(=O)O)OO
1-(5'-Phosphoribosyl)-5-amino-4-(N-succinocarboxamide)-imidazole	1467905854	OC(=O)CC(C(=O)O)NC(=O)c1ncn(c1N)C1OC(C(C1O)O)COP(=O)(O)O
(5Z,9E,14Z)-(8xi,11xi,12S)-8,11,12-Trihydroxyicosa-5,9,14-trienoate	1467905985	CCCCCC=CCC(C(C=CC(CC=CCCCC(=O)O)O)O)O
(5Z,9E,14Z)-(8xi,11R,12S)-11,12-Epoxy-8-hydroxyicosa-5,9,14-trienoic acid	1467906043	CCCCCC=CCC1OC1C=CC(CC=CCCCC(=O)O)O
20-OH-Leukotriene B4	1467906075	OCCCCCC=CCC(C=CC=CC=CC(CCCC(=O)O)O)O
7,8-Dihydroneopterin	1467906224	Nc1nc2NCC(=Nc2c(=O)[nH]1)C(C(CO)O)O
N-Acetyl-D-galactosaminyl-(N-acetylneuraminyl)-D-galactosyl-D-glucosylceramide	1467906308	CCCCCCCCCCCCCC=CC(C(NC(=O)[R])COC1OC(CO)C(C(C1O)O)OC1OC(CO)C(C(C1O)OC1(CC(O)C(C(O1)C(C(CO)O)O)NC(=O)C)C(=O)O)OC1OC(CO)C(C(C1NC(=O)C)O)O)O
7,8-Dihydroneopterin 3'-triphosphate	1467906370	OC(C(C1=Nc2c(NC1)nc([nH]c2=O)N)O)COP(=O)(OP(=O)(OP(=O)(O)O)O)O
1,3-beta-D-Galactosyl-N-acetyl-D-glucosaminyl-1,3-beta-D-galactosyl-1,4-D-glucosylceramide	1467906500	CCCCCCCCCCCCCC=CC(C(NC(=O)[R])COC1OC(CO)C(C(C1O)O)OC1OC(CO)C(C(C1O)OC1OC(CO)C(C(C1NC(=O)C)OC1OC(CO)C(C(C1O)O)O)O)O)O
D-Galactosyl-N-acetyl-D-galactosaminyl-(N-acetylneuraminyl)-D-galactosyl-D-glucosylceramide	1467906512	CCCCCCCCCCCCCC=CC(C(NC(=O)[R])COC1OC(CO)C(C(C1O)O)OC1OC(CO)C(C(C1O)OC1(CC(O)C(C(O1)C(C(CO)O)O)NC(=O)C)C(=O)O)OC1OC(CO)C(C(C1NC(=O)C)OC1OC(CO)C(C(C1O)O)O)O)O
N-Acetyl-beta-D-glucosaminyl-(1->6)-[N-acetyl-beta-D-glucosaminyl-(1->3)]-N-acetyl-alpha-D-galactosaminyl-R	1467906550	[R]OC1OC(COC2OC(CO)C(C(C2NC(=O)C)O)O)C(C(C1NC(=O)C)OC1OC(CO)C(C(C1NC(=O)C)O)O)O
N-Acetyl-D-galactosaminyl-N-Acetyl-D-galactosaminyl-1,3-D-galactosyl-1,4-D-galactosyl-1,4-D-glucosylceramide	1467906604	CCCCCCCCCCCCCC=CC(C(NC(=O)[R])COC1OC(CO)C(C(C1O)O)OC1OC(CO)C(C(C1O)O)OC1OC(CO)C(C(C1O)OC1OC(CO)C(C(C1NC(=O)C)OC1OC(CO)C(C(C1NC(=O)C)O)O)O)O)O
N-Acetylneuraminyl-D-galactosyl-N-acetyl-D-galactosaminyl-(N-acetylneuraminyl)-D-galactosyl-D-glucosylceramide	1467906622	CCCCCCCCCCCCCC=CC(C(NC(=O)[R])COC1OC(CO)C(C(C1O)O)OC1OC(CO)C(C(C1O)OC1(CC(O)C(C(O1)C(C(CO)O)O)NC(=O)C)C(=O)O)OC1OC(CO)C(C(C1NC(=O)C)OC1OC(CO)C(C(C1O)OC1(CC(O)C(C(O1)C(C(CO)O)O)NC(=O)C)C(=O)O)O)O)O
alpha-N-Acetylneuraminyl-2,3-beta-D-galactosyl-1,4-N-acetyl-beta-D-glucosaminyl-1,3-beta-D-galactosyl-1,4-D-glucosylceramide	1467906673	CCCCCCCCCCCCCC=CC(C(NC(=O)[R])COC1OC(CO)C(C(C1O)O)OC1OC(CO)C(C(C1O)OC1OC(CO)C(C(C1NC(=O)C)O)OC1OC(CO)C(C(C1O)OC1(CC(O)C(C(O1)C(C(CO)O)O)NC(=O)C)C(=O)O)O)O)O
N-Acetyl-D-glucosaminyl-1,3-beta-D-galactosyl-1,4-N-acetyl-beta-D-glucosaminyl-1,3-beta-D-galactosyl-1,4-beta-D-glucosylceramide	1467906688	CCCCCCCCCCCCCC=CC(C(NC(=O)[R])COC1OC(CO)C(C(C1O)O)OC1OC(CO)C(C(C1O)OC1OC(CO)C(C(C1NC(=O)C)O)OC1OC(CO)C(C(C1O)OC1OC(CO)C(C(C1NC(=O)C)O)O)O)O)O
Fructose 1-phosphate(pyranose)	1467906730	OC1COC(C(C1O)O)(O)COP(=O)(O)O
Ribulose	1467906853	OCC(C(C(=O)CO)O)O
Cyclosporin A	1467906959	CC=CCC(C(C1C(=O)NC(CC)C(=O)N(C)CC(=O)N(C)C(CC(C)C)C(=O)NC(C(C)C)C(=O)N(C)C(CC(C)C)C(=O)NC(C(=O)NC(C(=O)N(C(C(=O)N(C(C(=O)N(C(C(=O)N1C)C(C)C)C)CC(C)C)C)CC(C)C)C)C)C)O)C
3-Ureidoisobutyrate	1467906974	NC(=O)NCC(C(=O)O)C
4alpha-Methylzymosterol	1467906991	CC(=CCCC(C1CCC2C1(C)CCC1=C2CCC2C1(C)CCC(C2C)O)C)C
Delta7,24-Cholestadien-3beta-ol	1467907003	OC1CCC2(C(C1)CC=C1C2CCC2(C1CCC2C(CCC=C(C)C)C)C)C
7-Dehydrodesmosterol	1467907014	OC1CCC2(C(=CC=C3C2CCC2(C3CCC2C(CCC=C(C)C)C)C)C1)C
14-Demethyllanosterol	1467907027	CC(=CCCC(C1CCC2C1(C)CCC1=C2CCC2C1(C)CCC(C2(C)C)O)C)C
24,25-Dihydrolanosterol	1467907042	CC(CCCC(C1CCC2(C1(C)CCC1=C2CCC2C1(C)CCC(C2(C)C)O)C)C)C
4alpha-Methylcholesta-8-en-3beta-ol	1467907055	CC(CCCC(C1CCC2C1(C)CCC1=C2CCC2C1(C)CCC(C2C)O)C)C
S-(2-Methylbutanoyl)-dihydrolipoamide	1467907115	CCC(C(=O)SCCC(CCCCC(=O)N)S)C
S-(3-Methylbutanoyl)-dihydrolipoamide	1467907124	SC(CCSC(=O)CC(C)C)CCCCC(=O)N
Taurocholate	1467907133	OC1CCC2(C(C1)CC(C1C2CC(O)C2(C1CCC2C(CCC(=O)NCCS(=O)(=O)O)C)C)O)C
N-Methylhistamine	1467907190	Cn1cc(nc1)CC[N+]
Imidazole-4-acetaldehyde	1467907204	C(c1c[nH]cn1)C=O
17alpha-Hydroxypregnenolone	1467907259	OC1CCC2(C(=CCC3C2CCC2(C3CCC2(O)C(=O)C)C)C1)C
16alpha-Hydroxydehydroepiandrosterone	1467907272	OC1CCC2(C(=CCC3C2CCC2(C3CC(C2=O)O)C)C1)C
Estriol	1467907298	Oc1ccc2c(c1)CCC1C2CCC2(C1CC(C2O)O)C
trans-beta-D-Glucosyl-2-hydroxycinnamate	1467907445	OCC1OC(Oc2ccccc2C=CC(=O)O)C(C(C1O)O)O
Hydroxyacetone	1467907896	CC(=O)CO
(S)-3-Hydroxyhexadecanoyl-CoA	1467907975	CCCCCCCCCCCCCC(CC(=O)SCCNC(=O)CCNC(=O)C(C(COP(=O)(OP(=O)(OCC1OC(C(C1OP(=O)(O)O)O)n1cnc2c1ncnc2N)O)O)(C)C)O)O
3-Oxopalmitoyl-CoA	1467907985	CCCCCCCCCCCCCC(=O)CC(=O)SCCNC(=O)CCNC(=O)C(C(COP(=O)(OP(=O)(OCC1OC(C(C1OP(=O)(O)O)O)n1cnc2c1ncnc2N)O)O)(C)C)O
(S)-3-Hydroxytetradecanoyl-CoA	1467907997	CCCCCCCCCCCC(CC(=O)SCCNC(=O)CCNC(=O)C(C(COP(=O)(OP(=O)(OCC1OC(C(C1OP(=O)(O)O)O)n1cnc2c1ncnc2N)O)O)(C)C)O)O
3-Oxotetradecanoyl-CoA	1467908007	CCCCCCCCCCCC(=O)CC(=O)SCCNC(=O)CCNC(=O)C(C(COP(=O)(OP(=O)(OCC1OC(C(C1OP(=O)(O)O)O)n1cnc2c1ncnc2N)O)O)(C)C)O
(S)-3-Hydroxydodecanoyl-CoA	1467908016	CCCCCCCCCC(CC(=O)SCCNC(=O)CCNC(=O)C(C(COP(=O)(OP(=O)(OCC1OC(C(C1OP(=O)(O)O)O)n1cnc2c1ncnc2N)O)O)(C)C)O)O
3-Oxododecanoyl-CoA	1467908027	CCCCCCCCCC(=O)CC(=O)SCCNC(=O)CCNC(=O)C(C(COP(=O)(OP(=O)(OCC1OC(C(C1OP(=O)(O)O)O)n1cnc2c1ncnc2N)O)O)(C)C)O
(S)-Hydroxydecanoyl-CoA	1467908038	CCCCCCCC(CC(=O)SCCNC(=O)CCNC(=O)C(C(COP(=O)(OP(=O)(OCC1OC(C(C1OP(=O)(O)O)O)n1cnc2c1ncnc2N)O)O)(C)C)O)O
3-Oxodecanoyl-CoA	1467908051	CCCCCCCC(=O)CC(=O)SCCNC(=O)CCNC(=O)C(C(COP(=O)(OP(=O)(OCC1OC(C(C1OP(=O)(O)O)O)n1cnc2c1ncnc2N)O)O)(C)C)O
(S)-3-Hydroxyoctanoyl-CoA	1467908062	CCCCCC(CC(=O)SCCNC(=O)CCNC(=O)C(C(COP(=O)(OP(=O)(OCC1OC(C(C1OP(=O)(O)O)O)n1cnc2c1ncnc2N)O)O)(C)C)O)O
3-Oxooctanoyl-CoA	1467908075	CCCCCC(=O)CC(=O)SCCNC(=O)CCNC(=O)C(C(COP(=O)(OP(=O)(OCC1OC(C(C1OP(=O)(O)O)O)n1cnc2c1ncnc2N)O)O)(C)C)O
(S)-Hydroxyhexanoyl-CoA	1467908086	CCCC(CC(=O)SCCNC(=O)CCNC(=O)C(C(COP(=O)(OP(=O)(OCC1OC(C(C1OP(=O)(O)O)O)n1cnc2c1ncnc2N)O)O)(C)C)O)O
3-Oxohexanoyl-CoA	1467908099	CCCC(=O)CC(=O)SCCNC(=O)CCNC(=O)C(C(COP(=O)(OP(=O)(OCC1OC(C(C1OP(=O)(O)O)O)n1cnc2c1ncnc2N)O)O)(C)C)O
Hexanoyl-CoA	1467908112	CCCCCC(=O)SCCNC(=O)CCNC(=O)C(C(COP(=O)(OP(=O)(OCC1OC(C(C1OP(=O)(O)O)O)n1cnc2c1ncnc2N)O)O)(C)C)O
trans-Hex-2-enoyl-CoA	1467908124	CCCC=CC(=O)SCCNC(=O)CCNC(=O)C(C(COP(=O)(OP(=O)(OCC1OC(C(C1OP(=O)(O)O)O)n1cnc2c1ncnc2N)O)O)(C)C)O
trans-Hexadec-2-enoyl-CoA	1467908137	CCCCCCCCCCCCCC=CC(=O)SCCNC(=O)CCNC(=O)C(C(COP(=O)(OP(=O)(OCC1OC(C(C1OP(=O)(O)O)O)n1cnc2c1ncnc2N)O)O)(C)C)O
trans-Tetradec-2-enoyl-CoA	1467908150	CCCCCCCCCCCC=CC(=O)SCCNC(=O)CCNC(=O)C(C(COP(=O)(OP(=O)(OCC1OC(C(C1OP(=O)(O)O)O)n1cnc2c1ncnc2N)O)O)(C)C)O
Decanoyl-CoA	1467908162	CCCCCCCCCC(=O)SCCNC(=O)CCNC(=O)C(C(COP(=O)(OP(=O)(OCC1OC(C(C1OP(=O)(O)O)O)n1cnc2c1ncnc2N)O)O)(C)C)O
trans-Dec-2-enoyl-CoA	1467908174	CCCCCCCC=CC(=O)SCCNC(=O)CCNC(=O)C(C(COP(=O)(OP(=O)(OCC1OC(C(C1OP(=O)(O)O)O)n1cnc2c1ncnc2N)O)O)(C)C)O
trans-Oct-2-enoyl-CoA	1467908186	CCCCCC=CC(=O)SCCNC(=O)CCNC(=O)C(C(COP(=O)(OP(=O)(OCC1OC(C(C1OP(=O)(O)O)O)n1cnc2c1ncnc2N)O)O)(C)C)O
trans,cis-Lauro-2,6-dienoyl-CoA	1467908207	CCCCCC=CCCC=CC(=O)SCCNC(=O)CCNC(=O)C(C(COP(=O)(OP(=O)(OCC1OC(C(C1OP(=O)(O)O)O)n1cnc2c1ncnc2N)O)O)(C)C)O
cis,cis-3,6-Dodecadienoyl-CoA	1467908217	CCCCCC=CCC=CCC(=O)SCCNC(=O)CCNC(=O)C(C(COP(=O)(OP(=O)(OCC1OC(C(C1OP(=O)(O)O)O)n1cnc2c1ncnc2N)O)O)(C)C)O
11beta-Hydroxyandrost-4-ene-3,17-dione	1467908256	O=C1CCC2(C(=C1)CCC1C2C(O)CC2(C1CCC2=O)C)C
19-Hydroxyandrost-4-ene-3,17-dione	1467908282	OCC12CCC(=O)C=C1CCC1C2CCC2(C1CCC2=O)C
19-Hydroxytestosterone	1467908320	OCC12CCC(=O)C=C1CCC1C2CCC2(C1CCC2O)C
2-Hydroxyestrone	1467908365	O=C1CCC2C1(C)CCC1C2CCc2c1cc(O)c(c2)O
2-Methoxyestrone	1467908377	COc1cc2c(cc1O)CCC1C2CCC2(C1CCC2=O)C
16alpha-Hydroxyestrone	1467908389	Oc1ccc2c(c1)CCC1C2CCC2(C1CC(C2=O)O)C
2-Hydroxyestradiol	1467908402	OC1CCC2C1(C)CCC1C2CCc2c1cc(O)c(c2)O
2-Methoxy-17beta-estradiol	1467908416	COc1cc2c(cc1O)CCC1C2CCC2(C1CCC2O)C
Phenethylamine	1467908642	[N+]CCc1ccccc1
L-Selenomethionine	1467908671	C[Se]CCC(C(=O)O)N
Chenodeoxycholoyl-CoA	1467908690	OC1CCC2(C(C1)CC(C1C2CCC2(C1CCC2C(CCC(=O)SCCNC(=O)CCNC(=O)C(C(COP(=O)(OP(=O)(OCC1OC(C(C1OP(=O)(O)O)O)n1cnc2c1ncnc2N)O)O)(C)C)O)C)C)O)C
5(S)-HPETE	1467908842	CCCCCC=CCC=CCC=CC=CC(CCCC(=O)O)OO
Oxalosuccinate	1467909003	OC(=O)CC(C(=O)C(=O)O)C(=O)O
3-Carboxy-1-hydroxypropyl-ThPP	1467909028	OC(=O)CCC(c1sc(c([n+]1Cc1cnc(nc1N)C)C)CCOP(=O)(OP(=O)(O)O)O)O
Sedoheptulose 7-phosphate	1467909038	OCC(=O)C(C(C(C(COP(=O)(O)O)O)O)O)O
3-Keto-beta-D-galactose	1467909087	OCC1OC(O)C(C(=O)C1O)O
3-beta-D-Galactosyl-sn-glycerol	1467909128	OCC(COC1OC(CO)C(C(C1O)O)O)O
3-Ketolactose	1467909155	OCC1OC(O)C(C(C1OC1OC(CO)C(C(=O)C1O)O)O)O
Dehydroascorbate	1467909303	OCC(C1OC(=O)C(=O)C1=O)O
Zymosterol	1467909444	OC1CCC2(C(C1)CCC1=C2CCC2(C1CCC2C(CCC=C(C)C)C)C)C
Vitamin D2	1467909486	OC1CCC(=C)C(=CC=C2CCCC3(C2CCC3C(C=CC(C(C)C)C)C)C)C1
Vitamin D3	1467909515	CC(CCCC(C1CCC2C1(C)CCCC2=CC=C1CC(O)CCC1=C)C)C
3alpha,7alpha,26-Trihydroxy-5beta-cholestane	1467909531	OCC(CCCC(C1CCC2C1(C)CCC1C2C(O)CC2C1(C)CCC(C2)O)C)C
3alpha,7alpha-Dihydroxy-5beta-cholestan-26-al	1467909544	O=CC(CCCC(C1CCC2C1(C)CCC1C2C(O)CC2C1(C)CCC(C2)O)C)C
3alpha,7alpha,12alpha,26-Tetrahydroxy-5beta-cholestane	1467909555	OCC(CCCC(C1CCC2C1(C)C(O)CC1C2C(O)CC2C1(C)CCC(C2)O)C)C
(24E)-3alpha,7alpha-Dihydroxy-5beta-cholest-24-enoyl-CoA	1467909570	OC1CCC2(C(C1)CC(C1C2CCC2(C1CCC2C(CCC=C(C(=O)SCCNC(=O)CCNC(=O)C(C(COP(=O)(OP(=O)(OCC1OC(C(C1OP(=O)(O)O)O)n1cnc2c1ncnc2N)O)O)(C)C)O)C)C)C)O)C
(24R,25R)-3alpha,7alpha,24-Trihydroxy-5beta-cholestanoyl-CoA	1467909581	OC1CCC2(C(C1)CC(C1C2CCC2(C1CCC2C(CCC(C(C(=O)SCCNC(=O)CCNC(=O)C(C(COP(=O)(OP(=O)(OCC1OC(C(C1OP(=O)(O)O)O)n1cnc2c1ncnc2N)O)O)(C)C)O)C)O)C)C)O)C
3alpha,7alpha,12alpha,24-Tetrahydroxy-5beta-cholestanoyl-CoA	1467909602	OC1CCC2(C(C1)CC(C1C2CC(O)C2(C1CCC2C(CCC(C(C(=O)SCCNC(=O)CCNC(=O)C(C(COP(=O)(OP(=O)(OCC1OC(C(C1OP(=O)(O)O)O)n1cnc2c1ncnc2N)O)O)(C)C)O)C)O)C)C)O)C
7alpha-Hydroxy-5beta-cholestan-3-one	1467909614	CC(CCCC(C1CCC2C1(C)CCC1C2C(O)CC2C1(C)CCC(=O)C2)C)C
3alpha,7alpha-Dihydroxy-5beta-cholestane	1467909627	CC(CCCC(C1CCC2C1(C)CCC1C2C(O)CC2C1(C)CCC(C2)O)C)C
7alpha,12alpha-Dihydroxy-5beta-cholestan-3-one	1467909640	CC(CCCC(C1CCC2C1(C)C(O)CC1C2C(O)CC2C1(C)CCC(=O)C2)C)C
3alpha,7alpha,12alpha-Trihydroxy-5beta-cholestane	1467909653	CC(CCCC(C1CCC2C1(C)C(O)CC1C2C(O)CC2C1(C)CCC(C2)O)C)C
7alpha-Hydroxycholest-4-en-3-one	1467909668	CC(CCCC(C1CCC2C1(C)CCC1C2C(O)CC2=CC(=O)CCC12C)C)C
(24E)-3alpha,7alpha,12alpha-Trihydroxy-5beta-cholest-24-enoyl-CoA	1467909692	OC1CCC2(C(C1)CC(C1C2CC(O)C2(C1CCC2C(CCC=C(C(=O)SCCNC(=O)CCNC(=O)C(C(COP(=O)(OP(=O)(OCC1OC(C(C1OP(=O)(O)O)O)n1cnc2c1ncnc2N)O)O)(C)C)O)C)C)C)O)C
Taurodeoxycholate	1467909703	OC1CCC2(C(C1)CCC1C2CC(O)C2(C1CCC2C(CCC(=O)NCCS(=O)(=O)O)C)C)C
Glycodeoxycholate	1467909716	OC1CCC2(C(C1)CCC1C2CC(O)C2(C1CCC2C(CCC(=O)NCC(=O)O)C)C)C
Taurochenodeoxycholate	1467909731	OC1CCC2(C(C1)CC(C1C2CCC2(C1CCC2C(CCC(=O)NCCS(=O)(=O)O)C)C)O)C
Glycochenodeoxycholate	1467909746	OC1CCC2(C(C1)CC(C1C2CCC2(C1CCC2C(CCC(=O)NCC(=O)O)C)C)O)C
3alpha,7alpha,12alpha-Trihydroxy-5beta-24-oxocholestanoyl-CoA	1467909761	OC1CCC2(C(C1)CC(C1C2CC(O)C2(C1CCC2C(CCC(=O)C(C(=O)SCCNC(=O)CCNC(=O)C(C(COP(=O)(OP(=O)(OCC1OC(C(C1OP(=O)(O)O)O)n1cnc2c1ncnc2N)O)O)(C)C)O)C)C)C)O)C
Pregnanolone	1467909924	OC1CCC2(C(C1)CCC1C2CCC2(C1CCC2C(=O)C)C)C
21-Hydroxypregnenolone	1467909985	OCC(=O)C1CCC2C1(C)CCC1C2CC=C2C1(C)CCC(C2)O
17alpha,21-Dihydroxypregnenolone	1467909997	OCC(=O)C1(O)CCC2C1(C)CCC1C2CC=C2C1(C)CCC(C2)O
11-Deoxycortisol	1467910009	OCC(=O)C1(O)CCC2C1(C)CCC1C2CCC2=CC(=O)CCC12C
21-Deoxycortisol	1467910045	O=C1CCC2(C(=C1)CCC1C2C(O)CC2(C1CCC2(O)C(=O)C)C)C
20alpha-Hydroxycholesterol	1467910082	CC(CCCC(C1CCC2C1(C)CCC1C2CC=C2C1(C)CCC(C2)O)(O)C)C
20alpha,22beta-Dihydroxycholesterol	1467910096	CC(CCC(C(C1CCC2C1(C)CCC1C2CC=C2C1(C)CCC(C2)O)(O)C)O)C
22(R)-Hydroxycholesterol	1467910109	CC(CCC(C(C1CCC2C1(C)CCC1C2CC=C2C1(C)CCC(C2)O)C)O)C
16-Glucuronide-estriol	1467910137	OC(=O)C1OC(OC2CC3C(C2O)(C)CCC2C3CCc3c2ccc(c3)O)C(C(C1O)O)O
Deoxyinosine	1467910150	OCC1OC(CC1O)n1cnc2c1nc[nH]c2=O
2-Amino-3-oxoadipate	1467910207	OC(=O)CCC(=O)C(C(=O)O)N
3-Sulfinylpyruvate	1467910233	[O-]S(=O)CC(=O)C(=O)[O-]
3-Sulfopyruvate	1467910244	OC(=O)C(=O)CS(=O)(=O)O
Thiosulfate	1467910257	[S-]S(=O)(=O)O
Protein N6,N6-dimethyl-L-lysine	1467910314	[R]NC(=O)C(NC(=O)[R])CCCCN(C)C
Protein N6,N6,N6-trimethyl-L-lysine	1467910321	[R]NC(=O)C(NC(=O)[R])CCCC[N+](C)(C)C
Penicillin G	1467910339	O=C(Cc1ccccc1)NC1C(=O)N2C1SC(C2C(=O)O)(C)C
Biocytin	1467910352	O=C(NCCCCC(C(=O)O)N)CCCCC1SCC2C1NC(=O)N2
3,4-Dihydroxyphenylethyleneglycol	1467910508	OCC(c1ccc(c(c1)O)O)O
3,4-Dihydroxymandelaldehyde	1467910519	O=CC(c1ccc(c(c1)O)O)O
5,6-Dihydroxyindole	1467910531	Oc1cc2[nH]ccc2cc1O
Indole-5,6-quinone	1467910544	O=C1C=c2[nH]ccc2=CC1=O
3,4-Dihydroxymandelate	1467910554	OC(=O)C(c1ccc(c(c1)O)O)O
3-Methoxy-4-hydroxyphenylacetaldehyde	1467910567	O=CCc1ccc(c(c1)OC)O
Homovanillate	1467910580	COc1cc(ccc1O)CC(=O)O
3-Methoxy-4-hydroxyphenylglycolaldehyde	1467910594	O=CC(c1ccc(c(c1)OC)O)O
3-Methoxy-4-hydroxymandelate	1467910604	COc1cc(ccc1O)C(C(=O)O)O
Gentisate aldehyde	1467910616	O=Cc1cc(O)ccc1O
3-Methoxytyramine	1467910627	NCCc1ccc(c(c1)OC)O
L-Metanephrine	1467910639	CNCC(c1ccc(c(c1)OC)O)O
L-Normetanephrine	1467910649	NCC(c1ccc(c(c1)OC)O)O
Iodide	1467910659	I
Phenylacetylglycine	1467910726	O=C(Cc1ccccc1)NCC(=O)O
2-Carboxy-2,3-dihydro-5,6-dihydroxyindole	1467910762	OC(=O)C1Nc2c(C1)cc(c(c2)O)O
Phenyllactate	1467910783	OC(C(=O)O)Cc1ccccc1
5-Hydroxyindoleacetaldehyde	1467910973	O=CCc1c[nH]c2c1cc(O)cc2
5-Hydroxyindoleacetate	1467910983	OC(=O)Cc1c[nH]c2c1cc(O)cc2
3-Hydroxykynurenamine	1467910994	Nc1c(cccc1O)C(=O)CCN
4,8-Dihydroxyquinoline	1467911004	Oc1cccc2c1nccc2O
5-Hydroxykynurenamine	1467911015	Nc1ccc(cc1C(=O)CCN)O
4,6-Dihydroxyquinoline	1467911025	Oc1ccc2c(c1)c(O)ccn2
Formyl-N-acetyl-5-methoxykynurenamine	1467911058	O=CNc1ccc(cc1C(=O)CCNC(=O)C)OC
6-Hydroxymelatonin	1467911068	COc1cc2c(CCNC(=O)C)c[nH]c2cc1O
4-(2-Amino-3-hydroxyphenyl)-2,4-dioxobutanoate	1467911089	OC(=O)C(=O)CC(=O)c1cccc(c1N)O
Formyl-5-hydroxykynurenamine	1467911109	NCCC(=O)c1cc(O)ccc1NC=O
5-Hydroxy-N-formylkynurenine	1467911119	O=CNc1ccc(cc1C(=O)CC(C(=O)O)N)O
5-Hydroxykynurenine	1467911150	OC(=O)C(CC(=O)c1cc(O)ccc1N)N
Formylanthranilate	1467911171	O=CNc1ccccc1C(=O)O
5-Methoxyindoleacetate	1467911247	COc1ccc2c(c1)c(c[nH]2)CC(=O)O
3-Aminopropanal	1467911289	NCCC=O
3-Hydroxypropionyl-CoA	1467911300	OCCC(=O)SCCNC(=O)CCNC(=O)C(C(COP(=O)(OP(=O)(OCC1OC(C(C1OP(=O)(O)O)O)n1cnc2c1ncnc2N)O)O)(C)C)O
CMP-2-aminoethylphosphonate	1467911354	NCCP(=O)(OP(=O)(OCC1OC(C(C1O)O)n1ccc(nc1=O)N)O)O
CMP-N-trimethyl-2-aminoethylphosphonate	1467911365	OC1C(COP(=O)(OP(=O)(CC[N+](C)(C)C)O)O)OC(C1O)n1ccc(nc1=O)N
Adenylylselenate	1467911471	OC1C(COP(=O)(O[Se](=O)(=O)O)O)OC(C1O)n1cnc2c1ncnc2N
Se-Adenosylselenomethionine	1467911513	C[Se+](CC1OC(C(C1O)O)n1cnc2c1ncnc2N)CCC(C(=O)O)N
Se-Adenosyl-L-selenohomocysteine	1467911523	OC(=O)C(CC[Se]CC1OC(C(C1O)O)n1cnc2c1ncnc2N)N
Selenate	1467911568	[O-][Se](=O)(=O)O
L-Selenocystathionine	1467911591	[NH3+]C(C(=O)[O-])CC[Se]CC(C(=O)[O-])[NH3+]
Selenomethionine Se-oxide	1467911666	C[Se](=O)CCC(C(=O)O)N
gamma-Glutamyl-beta-cyanoalanine	1467911685	NC(C(=O)O)CCC(=O)NC(C(=O)O)CC#N
Uroporphyrinogen I	1467912042	OC(=O)Cc1c2Cc3[nH]c(c(c3CCC(=O)O)CC(=O)O)Cc3[nH]c(Cc4[nH]c(Cc(c1CCC(=O)O)[nH]2)c(CC(=O)O)c4CCC(=O)O)c(c3CCC(=O)O)CC(=O)O
Uroporphyrin I	1467912052	OC(=O)CCC1=C(CC(=O)O)C2=Cc3[nH]c(c(c3CCC(=O)O)CC(=O)O)C=C3N=C(C=c4[nH]c(=CC1=N2)c(CC(=O)O)c4CCC(=O)O)C(=C3CCC(=O)O)CC(=O)O
Coproporphyrinogen I	1467912063	OC(=O)CCc1c2Cc3[nH]c(c(c3C)CCC(=O)O)Cc3[nH]c(Cc4[nH]c(Cc(c1C)[nH]2)c(CCC(=O)O)c4C)c(c3C)CCC(=O)O
Coproporphyrin I	1467912074	OC(=O)CCC1=C(C)C2=Cc3[nH]c(c(c3CCC(=O)O)C)C=C3N=C(C=c4[nH]c(=CC1=N2)c(C)c4CCC(=O)O)C(=C3CCC(=O)O)C
Coproporphyrin III	1467912085	OC(=O)CCC1=C(C)C2=NC1=Cc1[nH]c(c(c1C)CCC(=O)O)C=C1N=C(C=c3[nH]c(=C2)c(CCC(=O)O)c3C)C(=C1CCC(=O)O)C
Bilirubin beta-diglucuronide	1467912239	C=CC1=C(C)C(=Cc2[nH]c(c(c2C)CCC(=O)OC2OC(C(=O)O)C(C(C2O)O)O)Cc2[nH]c(c(c2CCC(=O)OC2OC(C(=O)O)C(C(C2O)O)O)C)C=C2NC(=O)C(=C2C=C)C)NC1=O
3-Mercaptolactate	1467912574	OC(C(=O)O)CS
S-Sulfo-L-cysteine	1467912586	[O-]C(=O)C(CSS(=O)(=O)[O-])[N+]
Methylimidazole acetaldehyde	1467912608	Cn1cc(nc1)CC=O
Methylimidazoleacetic acid	1467912621	Cn1cc(nc1)CC(=O)O
Nicotinate D-ribonucleoside	1467912751	OCC1OC(C(C1O)O)[n+]1cccc(c1)C(=O)O
2-Hydroxyphenylacetate	1467912880	OC(=O)Cc1ccccc1O
Biotinyl-5'-AMP	1467913312	O=C1NC2C(N1)C(SC2)CCCCC(=O)OP(=O)(OCC1OC(C(C1O)O)n1cnc2c1ncnc2N)O
Formamidopyrimidine nucleoside triphosphate	1467913322	O=CNc1c(NC2OC(C(C2O)O)COP(=O)(OP(=O)(OP(=O)(O)O)O)O)nc([nH]c1=O)N
2,5-Diaminopyrimidine nucleoside triphosphate	1467913332	OC1C(COP(=O)(OP(=O)(OP(=O)(O)O)O)O)OC(C1O)Nc1nc(N)[nH]c(=O)c1N
N(omega)-Hydroxyarginine	1467913437	ONC(=[NH2+])NCCCC(C(=O)[O-])[NH3+]
N4-Acetylaminobutanal	1467913450	O=CCCCNC(=O)C
L-4-Hydroxyglutamate semialdehyde	1467913461	O=CC(CC(C(=O)[O-])[N+])O
12-Keto-leukotriene B4	1467913584	CCCCCC=CCC(=O)C=CC=CC=CC(CCCC(=O)O)O
20-COOH-Leukotriene B4	1467913598	OC(=O)CCCCC=CCC(C=CC=CC=CC(CCCC(=O)O)O)O
Leukotriene D4	1467913613	CCCCCC=CCC=CC=CC=CC(C(CCCC(=O)O)O)SCC(C(=O)NCC(=O)O)N
Leukotriene E4	1467913628	CCCCCC=CCC=CC=CC=CC(C(CCCC(=O)[O-])O)SCC(C(=O)[O-])[NH3+]
Prostaglandin A2	1467913644	CCCCCC(C=CC1C=CC(=O)C1CC=CCCCC(=O)O)O
Prostaglandin B2	1467913658	CCCCCC(C=CC1=C(CC=CCCCC(=O)O)C(=O)CC1)O
Prostaglandin C2	1467913672	CCCCCC(C=CC1=CCC(=O)C1CC=CCCCC(=O)O)O
Prostaglandin G2	1467913685	CCCCCC(C=CC1C2OOC(C1CC=CCCCC(=O)O)C2)OO
Prostaglandin J2	1467913700	CCCCCC(C=CC1C(CC=CCCCC(=O)O)C=CC1=O)O
Delta-12-Prostaglandin J2	1467913714	CCCCCC(CC=C1C(CC=CCCCC(=O)O)C=CC1=O)O
15-Keto-prostaglandin F2alpha	1467913743	CCCCCC(=O)C=CC1C(O)CC(C1CC=CCCCC(=O)O)O
6-Keto-prostaglandin F1alpha	1467913758	CCCCCC(C=CC1C(O)CC(C1CC(=O)CCCCC(=O)O)O)O
Thromboxane B2	1467913788	CCCCCC(C=CC1OC(O)CC(C1CC=CCCCC(=O)O)O)O
11-Dehydro-thromboxane B2	1467913802	CCCCCC(C=CC1OC(=O)CC(C1CC=CCCCC(=O)O)O)O
12(S)-HPETE	1467913815	CCCCCC=CCC(C=CC=CCC=CCCCC(=O)O)OO
15(S)-HPETE	1467913833	CCCCCC(C=CC=CCC=CCC=CCCCC(=O)O)OO
Cardiolipin	1467913907	OC(COP(=O)(OCC(OC(=O)[R])COC(=O)[R])O)COP(=O)(OCC(OC(=O)[R])COC(=O)[R])O
Propionyladenylate	1467913925	CCC(=O)OP(=O)(OCC1OC(C(C1O)O)n1cnc2c1ncnc2N)O
2-Hydroxybutanoic acid	1467913936	CCC(C(=O)O)O
3-Oxopropionyl-CoA	1467913988	O=CCC(=O)SCCNC(=O)CCNC(=O)C(C(COP(=O)(OP(=O)(OCC1OC(C(C1OP(=O)(O)O)O)n1cnc2c1ncnc2N)O)O)(C)C)O
Acetyl adenylate	1467914015	CC(=O)OP(=O)(OCC1OC(C(C1O)O)n1cnc2c1ncnc2N)O
3-Hydroxyisovaleryl-CoA	1467914056	O=C(NCCSC(=O)CC(O)(C)C)CCNC(=O)C(C(COP(=O)(OP(=O)(OCC1OC(C(C1OP(=O)(O)O)O)n1cnc2c1ncnc2N)O)O)(C)C)O
2-Methylfumaryl-CoA	1467914300	O=C(NCCSC(=O)C(=CC(=O)O)C)CCNC(=O)C(C(COP(=O)(OP(=O)(OCC1OC(C(C1OP(=O)(O)O)O)n1cnc2c1ncnc2N)O)O)(C)C)O
Adipate	1467915028	[O-]C(=O)CCCCC(=O)O
gamma-Glutamyl-beta-aminopropiononitrile	1467915116	N#CCCNC(=O)CCC(C(=O)O)N
Hexadecenal	1467915162	CCCCCCCCCCCCCC=CC=O
Sphingosine 1-phosphate	1467915175	CCCCCCCCCCCCCC=CC(C(COP(=O)([O-])[O-])[N+])O
Gal-alpha1->3(Fuc-alpha1->2)Gal-beta1->3GlcNAc-beta1->3LacCer	1467915234	CCCCCCCCCCCCCC=CC(C(NC(=O)[R])COC1OC(CO)C(C(C1O)O)OC1OC(CO)C(C(C1O)OC1OC(CO)C(C(C1NC(=O)C)OC1OC(CO)C(C(C1OC1OC(C)C(C(C1O)O)O)OC1OC(CO)C(C(C1O)O)O)O)O)O)O
Fuc-alpha1->2Gal-beta1->3GlcNAc-beta1->3Gal-beta1->4Glc-beta1-1'Cer	1467915242	CCCCCCCCCCCCCC=CC(C(NC(=O)[R])COC1OC(CO)C(C(C1O)O)OC1OC(CO)C(C(C1O)OC1OC(CO)C(C(C1NC(=O)C)OC1OC(CO)C(C(C1OC1OC(C)C(C(C1O)O)O)O)O)O)O)O
Type A glycolipid	1467915248	CCCCCCCCCCCCCC=CC(C(NC(=O)[R])COC1OC(CO)C(C(C1O)O)OC1OC(CO)C(C(C1O)OC1OC(CO)C(C(C1NC(=O)C)OC1OC(CO)C(C(C1OC1OC(C)C(C(C1O)O)O)OC1OC(CO)C(C(C1NC(=O)C)O)O)O)O)O)O
GD3	1467915256	CCCCCCCCCCCCCC=CC(C(NC(=O)[R])COC1OC(CO)C(C(C1O)O)OC1OC(CO)C(C(C1O)OC1(CC(O)C(C(O1)C(C(OC1(CC(O)C(C(O1)C(C(CO)O)O)NC(=O)C)C(=O)O)CO)O)NC(=O)C)C(=O)O)O)O
GD2	1467915265	CCCCCCCCCCCCCC=CC(C(NC(=O)[R])COC1OC(CO)C(C(C1O)O)OC1OC(CO)C(C(C1O)OC1(CC(O)C(C(O1)C(C(OC1(CC(O)C(C(O1)C(C(CO)O)O)NC(=O)C)C(=O)O)CO)O)NC(=O)C)C(=O)O)OC1OC(CO)C(C(C1NC(=O)C)O)O)O
GA2	1467915274	CCCCCCCCCCCCCC=CC(C(NC(=O)[R])COC1OC(CO)C(C(C1O)O)OC1OC(CO)C(C(C1O)O)OC1OC(CO)C(C(C1NC(=O)C)O)O)O
GT1a	1467915292	CCCCCCCCCCCCCC=CC(C(NC(=O)[R])COC1OC(CO)C(C(C1O)O)OC1OC(CO)C(C(C1O)OC1(CC(O)C(C(O1)C(C(CO)O)O)NC(=O)C)C(=O)O)OC1OC(CO)C(C(C1NC(=O)C)OC1OC(CO)C(C(C1O)OC1(CC(O)C(C(O1)C(C(OC1(CC(O)C(C(O1)C(C(CO)O)O)NC(=O)C)C(=O)O)CO)O)NC(=O)C)C(=O)O)O)O)O
GQ1	1467915301	CCCCCCCCCCCCCC=CC(C(NC(=O)[R])COC1OC(CO)C(C(C1O)O)OC1OC(CO)C(C(C1O)OC1(CC(O)C(C(O1)C(C(OC1(CC(O)C(C(O1)C(C(CO)O)O)NC(=O)C)C(=O)O)CO)O)NC(=O)C)C(=O)O)OC1OC(CO)C(C(C1NC(=O)C)OC1OC(CO)C(C(C1O)OC1(CC(O)C(C(O1)C(C(OC1(CC(O)C(C(O1)C(C(CO)O)O)NC(=O)C)C(=O)O)CO)O)NC(=O)C)C(=O)O)O)O)O
GT1b	1467915310	CCCCCCCCCCCCCC=CC(C(NC(=O)[R])COC1OC(CO)C(C(C1O)O)OC1OC(CO)C(C(C1O)OC1(CC(O)C(C(O1)C(C(OC1(CC(O)C(C(O1)C(C(CO)O)O)NC(=O)C)C(=O)O)CO)O)NC(=O)C)C(=O)O)OC1OC(CO)C(C(C1NC(=O)C)OC1OC(CO)C(C(C1O)OC1(CC(O)C(C(O1)C(C(CO)O)O)NC(=O)C)C(=O)O)O)O)O
GD1b	1467915319	CCCCCCCCCCCCCC=CC(C(NC(=O)[R])COC1OC(CO)C(C(C1O)O)OC1OC(CO)C(C(C1O)OC1(CC(O)C(C(O1)C(C(OC1(CC(O)C(C(O1)C(C(CO)O)O)NC(=O)C)C(=O)O)CO)O)NC(=O)C)C(=O)O)OC1OC(CO)C(C(C1NC(=O)C)OC1OC(CO)C(C(C1O)O)O)O)O
1-Methylpyrrolinium	1467915647	C[N+]1=CCCC1
2'-Deoxyinosine 5'-phosphate	1467915839	OC1CC(OC1COP(=O)(O)O)n1cnc2c1[nH]cnc2=O
Hordenine	1467915871	CN(CCc1ccc(cc1)O)C
N-Methylserotonin	1467915974	CNCCc1c[nH]c2c1cc(O)cc2
Celloheptaose	1467916012	OCC1OC(OC2C(CO)OC(C(C2O)O)OC2C(CO)OC(C(C2O)O)OC2C(CO)OC(C(C2O)O)O)C(C(C1OC1OC(CO)C(C(C1O)O)OC1OC(CO)C(C(C1O)O)OC1OC(CO)C(C(C1O)O)O)O)O
N-Acetylneuraminate 9-phosphate	1467916172	CC(=O)NC1C(O)CC(OC1C(C(COP(=O)(O)O)O)O)(O)C(=O)O
NeuAc-alpha2->8NeuAc-alpha2->8NeuAc2->3LacCer	1467916396	CCCCCCCCCCCCCC=CC(C(NC(=O)[R])COC1OC(CO)C(C(C1O)O)OC1OC(CO)C(C(C1O)OC1(CC(O)C(C(O1)C(C(OC1(CC(O)C(C(O1)C(C(OC1(CC(O)C(C(O1)C(C(CO)O)O)NC(=O)C)C(=O)O)CO)O)NC(=O)C)C(=O)O)CO)O)NC(=O)C)C(=O)O)O)O
(+)-alpha-Pinene	1467916444	CC1=CCC2CC1C2(C)C
Lipoxin A4	1467916546	CCCCCC(C=CC=CC=CC=CC(C(CCCC(=O)O)O)O)O
Lipoxin B4	1467916562	CCCCCC(C(C=CC=CC=CC=CC(CCCC(=O)O)O)O)O
7alpha,27-Dihydroxycholesterol	1467916875	OCC(CCCC(C1CCC2C1(C)CCC1C2C(O)C=C2C1(C)CCC(C2)O)C)C
Octanoic acid	1467917646	CCCCCCCC(=O)O
Tetradecanoic acid	1467917663	CCCCCCCCCCCCCC(=O)O
Icosanoic acid	1467917680	CCCCCCCCCCCCCCCCCCCC(=O)O
(6Z,9Z,12Z)-Octadecatrienoic acid	1467917697	CCCCCC=CCC=CCC=CCCCCC(=O)O
(9Z,12Z,15Z)-Octadecatrienoic acid	1467917714	CCC=CCC=CCC=CCCCCCCCC(=O)O
(5Z,8Z,11Z,14Z,17Z)-Icosapentaenoic acid	1467917733	CCC=CCC=CCC=CCC=CCC=CCCCC(=O)O
(4Z,7Z,10Z,13Z,16Z,19Z)-Docosahexaenoic acid	1467917752	CCC=CCC=CCC=CCC=CCC=CCC=CCCC(=O)O
Prostaglandin D1	1467917822	CCCCCC(C=CC1C(=O)CC(C1CCCCCCC(=O)O)O)O
Prostaglandin E3	1467917835	CCC=CCC(C=CC1C(O)CC(=O)C1CC=CCCCC(=O)O)O
Leukotriene F4	1467918028	CCCCCC=CCC=CC=CC=CC(C(CCCC(=O)O)O)SCC(C(=O)O)NC(=O)CCC(C(=O)O)N
Prostaglandin F1alpha	1467918200	CCCCCC(C=CC1C(O)CC(C1CCCCCCC(=O)O)O)O
Aflatoxin B1	1467921390	COc1cc2OC3C(c2c2c1c1CCC(=O)c1c(=O)o2)C=CO3
Acetaminophen	1467921436	CC(=O)Nc1ccc(cc1)O
Acetylcysteine	1467921491	SCC(C(=O)O)NC(=O)C
Atorvastatin	1467921677	OC(CC(CC(=O)O)O)CCn1c(C(C)C)c(c(c1c1ccc(cc1)F)c1ccccc1)C(=O)Nc1ccccc1
Diazepam	1467922629	Clc1ccc2c(c1)C(=NCC(=O)N2C)c1ccccc1
Fluvastatin	1467923090	OC(=O)CC(CC(C=Cc1c(c2ccc(cc2)F)c2c(n1C(C)C)cccc2)O)O
Losartan	1467923494	CCCCc1nc(c(n1Cc1ccc(cc1)c1ccccc1c1nnn[nH]1)CO)Cl
Phenylacetic acid	1467923604	OC(=O)Cc1ccccc1
Tolbutamide	1467924185	CCCCNC(=O)NS(=O)(=O)c1ccc(cc1)C
Metformin	1467924206	CN(C(=N)NC(=N)N)C
Nifedipine	1467925065	COC(=O)C1=C(C)NC(=C(C1c1ccccc1[N+](=O)[O-])C(=O)OC)C
4,8,12-Trimethyltridecanoyl-CoA	1467925365	CC(CCC(=O)SCCN=C(CCN=C(C(C(COP(=O)(OP(=O)(OCC1OC(C(C1OP(=O)(O)O)O)n1cnc2c1ncnc2N)O)O)(C)C)O)O)O)CCCC(CCCC(C)C)C
3-Oxopristanoyl-CoA	1467925374	CC(CCC(=O)C(C(=O)SCCNC(=O)CCNC(=O)C(C(COP(=O)(OP(=O)(OCC1OC(C(C1OP(=O)(O)O)O)n1cnc2c1ncnc2N)O)O)(C)C)O)C)CCCC(CCCC(C)C)C
Omeprazole	1467925631	COc1ccc2c(c1)nc([nH]2)S(=O)Cc1ncc(c(c1C)OC)C
(9Z,12Z)-(11S)-11-Hydroperoxyoctadeca-9,12-dienoic acid	1467925770	CCCCCC=CC(C=CCCCCCCCC(=O)O)OO
2-Hydroxyphytanoyl-CoA	1467925823	CC(CCCC(CCCC(C)C)C)CCCC(C(C(=O)SCCNC(=O)CCNC(=O)C(C(COP(=O)(OP(=O)(OCC1OC(C(C1OP(=O)(O)O)O)n1cnc2c1ncnc2N)O)O)(C)C)O)O)C
Paclitaxel	1467926198	CC(=O)OC1C(=O)C2(C)C(O)CC3C(C2C(C2(C(C1=C(C)C(OC(=O)C(C(c1ccccc1)NC(=O)c1ccccc1)O)C2)(C)C)O)OC(=O)c1ccccc1)(CO3)OC(=O)C
Nordazepam	1467927028	O=C1CN=C(c2c(N1)ccc(c2)Cl)c1ccccc1
Midazolam	1467927421	Clc1ccc2c(c1)C(=NCc1n2c(C)nc1)c1ccccc1F
Benzo[a]pyrene	1467927542	c1ccc2c(c1)c1ccc3c4c1c(c2)ccc4ccc3
Alloxanthine	1467928190	Oc1nc(O)c2c(n1)[nH]nc2
3,3',5'-Triiodo-L-thyronine	1467928615	[O-]C(=O)C(Cc1ccc(c(c1)I)Oc1cc(I)c(c(c1)I)O)[N+]
Previtamin D(3)	1467929129	CC(CCCC(C1CCC2C1(C)CCC=C2C=CC1=C(C)CCC(C1)O)C)C
Secalciferol	1467929143	OC1CCC(=C)C(=CC=C2CCCC3(C2CCC3C(CCC(C(O)(C)C)O)C)C)C1
Cerivastatin	1467930659	COCc1c(c2ccc(cc2)F)c(C=CC(CC(CC(=O)O)O)O)c(nc1C(C)C)C(C)C
Azelaic acid	1467932597	OC(=O)CCCCCCCC(=O)O
3-(Methylthio)propanoate	1467932779	CSCCC(=O)O
Sebacic acid	1467932794	OC(=O)CCCCCCCCC(=O)O
Suberic acid	1467932809	OC(=O)CCCCCCC(=O)O
Docosanoic acid	1467932854	CCCCCCCCCCCCCCCCCCCCCC(=O)O
Erucic acid	1467933253	CCCCCCCCC=CCCCCCCCCCCCC(=O)O
12-Hydroxydodecanoic acid	1467933269	OCCCCCCCCCCCC(=O)O
Tetracosanoic acid	1467933316	CCCCCCCCCCCCCCCCCCCCCCCC(=O)O
Myristoleic acid	1467933344	CCCCC=CCCCCCCCC(=O)O
(15Z)-Tetracosenoic acid	1467933362	CCCCCCCCC=CCCCCCCCCCCCCCC(=O)O
(9Z)-Hexadecenoic acid	1467933773	CCCCCCC=CCCCCCCCC(=O)O
(11E)-Octadecenoic acid	1467933853	CCCCCCC=CCCCCCCCCCC(=O)O
Vernolic acid	1467933869	CCCCCC1OC1CC=CCCCCCCCC(=O)O
Umbelliferone	1467945387	Oc1ccc2c(c1)oc(=O)cc2
(-)-Salsoline	1467949330	COc1cc2C(C)NCCc2cc1O
(-)-Salsolinol	1467949354	CC1NCCc2c1cc(O)c(c2)O
Ecgonine	1467964445	OC1CC2CCC(C1C(=O)O)N2C
all-trans-Retinoyl-beta-glucuronide	1467966621	O=C(OC1OC(C(=O)O)C(C(C1O)O)O)C=C(C=CC=C(C=CC1=C(C)CCCC1(C)C)C)C
Estrone glucuronide	1467967380	OC1C(O)C(Oc2ccc3c(c2)CCC2C3CCC3(C2CCC3=O)C)OC(C1O)C(=O)O
Testosterone glucuronide	1467967395	O=C1CCC2(C(=C1)CCC1C2CCC2(C1CCC2OC1OC(C(=O)O)C(C(C1O)O)O)C)C
Androsterone glucuronide	1467967408	OC(=O)C1OC(OC2CCC3(C(C2)CCC2C3CCC3(C2CCC3=O)C)C)C(C(C1O)O)O
Dichloroacetate	1467967527	ClC(C(=O)O)Cl
1-Diphosinositol pentakisphosphate	1467967773	[O-]P(=O)(OC1C(OP(=O)(OP(=O)(O)[O-])[O-])C(OP(=O)([O-])[O-])C(C(C1OP(=O)([O-])[O-])OP(=O)([O-])[O-])OP(=O)([O-])[O-])[O-]
S-(2,4-Dinitrophenyl)glutathione	1467967786	O=C(NC(C(=O)NCC(=O)O)CSc1ccc(cc1[N+](=O)[O-])[N+](=O)[O-])CCC(C(=O)O)N
Cholesteryl palmitate	1467968480	CCCCCCCCCCCCCCCC(=O)OC1CCC2(C(=CCC3C2CCC2(C3CCC2C(CCCC(C)C)C)C)C1)C
Sulfoglycolithocholate	1467968977	O=C(NCC(=O)[O-])CCC(C1CCC2C1(C)CCC1C2CCC2C1(C)CCC(C2)OS(=O)(=O)[O-])C
S-(PGA1)-glutathione	1467969012	CCCCCC(C=CC1C(SCC(C(=O)NCC(=O)O)NC(=O)CCC(C(=O)O)N)CC(=O)C1CCCCCCC(=O)O)O
Leucyl-leucine	1467969307	CC(CC(C(=O)NC(C(=O)O)CC(C)C)N)C
N-Acetylleukotriene E4	1467969624	CCCCCC=CCC=CC=CC=CC(C(CCCC(=O)O)O)SCC(C(=O)O)NC(=O)C
Ubiquinone-10	1467969792	COC1=C(OC)C(=O)C(=C(C1=O)CC=C(CCC=C(CCC=C(CCC=C(CCC=C(CCC=C(CCC=C(CCC=C(CCC=C(CCC=C(C)C)C)C)C)C)C)C)C)C)C)C
4,4-Dimethyl-5alpha-cholesta-8,14,24-trien-3beta-ol	1467970572	CC(=CCCC(C1CC=C2C1(C)CCC1=C2CCC2C1(C)CCC(C2(C)C)O)C)C
3-(3-Hydroxyphenyl)propanoic acid	1467970593	OC(=O)CCc1cccc(c1)O
L-Arabinose	1467970739	OCC(C(C(C=O)O)O)O
Sulfite	1467970772	[O-]S(=O)[O-]
(S)-3-Sulfolactate	1467970956	OC(=O)C(CS(=O)(=O)O)O
Anandamide	1467972863	CCCCCC=CCC=CCC=CCC=CCCCC(=O)NCCO
5-Hydroxyisourate	1467974141	O=C1N=C2N=C(NC2(C(=O)N1)O)O
Perillic acid	1467975299	CC(=C)C1CCC(=CC1)C(=O)O
trans-2-Methyl-5-isopropylhexa-2,5-dienoyl-CoA	1467975539	O=C(NCCSC(=O)C(=CCC(=C)C(C)C)C)CCNC(=O)C(C(COP(=O)(OP(=O)(OCC1OC(C(C1OP(=O)(O)O)O)n1cnc2c1ncnc2N)O)O)(C)C)O
3-Hydroxy-2,6-dimethyl-5-methylene-heptanoyl-CoA	1467975559	O=C(NCCSC(=O)C(C(CC(=C)C(C)C)O)C)CCNC(=O)C(C(COP(=O)(OP(=O)(OCC1OC(C(C1OP(=O)(O)O)O)n1cnc2c1ncnc2N)O)O)(C)C)O
Phytosphingosine	1467977554	CCCCCCCCCCCCCCC(C(C(CO)[N+])O)O
Phytoceramide	1467977568	CCCCCCCCCCCCCCC(C(C(NC(=O)[R])CO)O)O
Ecgonine methyl ester	1467980629	COC(=O)C1C(O)CC2[N+](C1CC2)C
Pseudoecgonyl-CoA	1467980652	O=C(NCCSC(=O)C1C(O)CC2N(C1CC2)C)CCNC(=O)C(C(COP(=O)(OP(=O)(OCC1OC(C(C1OP(=O)(O)O)O)n1cnc2c1ncnc2N)O)O)(C)C)O
Epidihydrocholesterin	1467982398	CC(CCCC(C1CCC2C1(C)CCC1C2CCC2C1(C)CCC(C2)O)C)C
N2-Acetyl-L-lysine	1467982462	CC(=O)NC(C(=O)O)CCCCN
Ether	1467983039	CCOCC
Antipyrine	1467983052	O=c1cc(n(n1c1ccccc1)C)C
Pitavastatin	1467983189	OC(CC(C=Cc1c(nc2c(c1c1ccc(cc1)F)cccc2)C1CC1)O)CC(=O)[O-]
Phosphodimethylethanolamine	1467983596	[O-]P(=O)(OCC[N+](C)C)[O-]
Cerebrosterol	1467983806	OC1CCC2(C(=CCC3C2CCC2(C3CCC2C(CCC(C(C)C)O)C)C)C1)C
Debrisoquin	1467984192	NC(=N)N1CCc2c(C1)cccc2
Dopamine 3-O-sulfate	1467984489	[N+]CCc1ccc(c(c1)OS(=O)(=O)[O-])O
Dopamine 4-O-sulfate	1467984500	NCCc1ccc(c(c1)O)OS(=O)(=O)O
Allotetrahydrodeoxycorticosterone	1467984742	OCC(=O)C1CCC2C1(C)CCC1C2CCC2C1(C)CCC(C2)O
Prostaglandin D3	1467985618	CCC=CCC(C=CC1C(=O)CC(C1CC=CCCCC(=O)O)O)O
8,11,14-Eicosatrienoylethanolamide	1467985913	CCCCCC=CCC=CCC=CCCCCCCC(=O)NCCO
7,10,13,16-Docosatetraenoylethanolamine	1467985925	CCCCCC=CCC=CCC=CCC=CCCCCCC(=O)NCCO
2-Arachidonoylglycerol	1467986186	CCCCCC=CCC=CCC=CCC=CCCCC(=O)OC(CO)CO
1-Arachidonoylglycerol	1467986201	CCCCCC=CCC=CCC=CCC=CCCCC(=O)OCC(CO)O
Adipyl-CoA	1467987962	O=C(NCCSC(=O)CCCCC(=O)O)CCNC(=O)C(C(COP(=O)(OP(=O)(OCC1OC(C(C1OP(=O)(O)O)O)n1cnc2c1ncnc2N)O)O)(C)C)O
beta-Tocopherol	1467988059	CC(CCCC(CCCC(C)C)C)CCCC1(C)CCc2c(O1)c(C)cc(c2C)O
alpha-Tocotrienol	1467988071	CC(=CCCC1(C)CCc2c(O1)c(C)c(c(c2C)O)C)CCC=C(CCC=C(C)C)C
S-(Hydroxymethyl)glutathione	1467988355	OCSCC(C(=O)NCC(=O)O)NC(=O)CCC(C(=O)O)N
4-Hydroxyestradiol-17beta	1467988651	OC1CCC2C1(C)CCC1C2CCc2c1ccc(c2O)O
6beta-Hydroxytestosterone	1467991777	O=C1CCC2(C(=C1)C(O)CC1C2CCC2(C1CCC2O)C)C
Cholesteryl oleate	1467993338	CCCCCCCCC=CCCCCCCCC(=O)OC1CCC2(C(=CCC3C2CCC2(C3CCC2C(CCCC(C)C)C)C)C1)C
15-Deoxy-Delta12,14-PGJ2	1467994194	CCCCCC=CC=C1C(CC=CCCCC(=O)O)C=CC1=O
5-OxoETE	1467994349	CCCCCC=CCC=CCC=CC=CC(=O)CCCC(=O)O
20-HETE	1467994505	OCCCCCC=CCC=CCC=CCC=CCCCC(=O)O
5,6-EET	1467994741	CCCCCC=CCC=CCC=CCC1OC1CCCC(=O)O
8,9-EET	1467994754	CCCCCC=CCC=CCC1OC1CC=CCCCC(=O)O
11,12-EET	1467994767	CCCCCC=CCC1OC1CC=CCC=CCCCC(=O)O
14,15-EET	1467994780	CCCCCC1OC1CC=CCC=CCC=CCCCC(=O)O
12(S)-HETE	1467994859	CCCCCC=CCC(C=CC=CCC=CCCCC(=O)O)O
(1R,2S)-Naphthalene 1,2-oxide	1467994973	c1ccc2c(c1)C1OC1C=C2
5,6-Epoxytetraene	1467995282	CCCCCC(C=CC=CC=CC=CC1OC1CCCC(=O)O)O
Fe2+	1467995313	[Fe+2]
Fe3+	1467995326	[Fe+3]
9(10)-EpOME	1467995407	CCCCCC=CCC1OC1CCCCCCCC(=O)O
9,10-DHOME	1467995447	CCCCCC=CCC(C(CCCCCCCC(=O)O)O)O
12,13-DHOME	1467995460	CCCCCC(C(CC=CCCCCCCCC(=O)O)O)O
Benzo[a]pyrene-9,10-oxide	1467995682	c1cc2ccc3c4c2c(c1)ccc4cc1c3C2OC2C=C1
Benzo[a]pyrene-4,5-oxide	1467995704	c1ccc2c(c1)c1ccc3c4c1c(c2)C1OC1c4ccc3
Cholesteryl linoleate	1468001379	CCCCCC=CCC=CCCCCCCCC(=O)OC1CCC2(C(=CCC3C2CCC2(C3CCC2C(CCCC(C)C)C)C)C1)C
Murideoxycholic acid	1468002082	OC1CCC2(C(C1)C(O)CC1C2CCC2(C1CCC2C(CCC(=O)O)C)C)C
Taurohyocholate	1468002096	OC1CCC2(C(C1)C(O)C(C1C2CCC2(C1CCC2C(CCC(=O)NCCS(=O)(=O)O)C)C)O)C
(24S)-Cholest-5-ene-3beta,7alpha,24-triol	1468002124	OC1CCC2(C(=CC(C3C2CCC2(C3CCC2C(CCC(C(C)C)O)C)C)O)C1)C
25-Hydroxycholesterol	1468002135	OC1CCC2(C(=CCC3C2CCC2(C3CCC2C(CCCC(O)(C)C)C)C)C1)C
Cholest-5-ene-3beta,7alpha,25-triol	1468002149	OC1CCC2(C(=CC(C3C2CCC2(C3CCC2C(CCCC(O)(C)C)C)C)O)C1)C
4a-Hydroxytetrahydrobiopterin	1468002169	NC1=NC(=O)C2(C(=N1)NCC(N2)C(C(O)C)O)O
Glycolithocholate	1468002481	OC1CCC2(C(C1)CCC1C2CCC2(C1CCC2C(CCC(=O)NCC(=O)O)C)C)C
Deoxycholoyl-CoA	1468002509	OC1CCC2(C(C1)CCC1C2CC(O)C2(C1CCC2C(CCC(=O)SCCN=C(CCN=C(C(C(COP(=O)(OP(=O)(OCC1OC(C(C1OP(=O)(O)O)O)n1cnc2c1ncnc2N)O)O)(C)C)O)O)O)C)C)C
1,2-Dihydroxy-5-(methylthio)pent-1-en-3-one	1468002885	CSCCC(=O)C(=CO)O
Cholest-5-ene-3beta,26-diol	1468002921	OCC(CCCC(C1CCC2C1(C)CCC1C2CC=C2C1(C)CCC(C2)O)C)C
2,3-Diketo-5-methylthiopentyl-1-phosphate	1468003327	CSCCC(=O)C(=O)COP(=O)(O)O
1-Pyrroline	1468003508	C1CCC=[N+]1
4alpha-Methylzymosterol-4-carboxylate	1468004887	CC(=CCCC(C1CCC2C1(C)CCC1=C2CCC2C1(C)CCC(C2(C)C(=O)O)O)C)C
3-Keto-4-methylzymosterol	1468004953	CC(=CCCC(C1CCC2C1(C)CCC1=C2CCC2C1(C)CCC(=O)C2C)C)C
Dehydrospermidine	1468005215	[N+]CCC[N+]=CCCC[N+]
4,4-Dimethyl-5alpha-cholesta-8-en-3beta-ol	1468005755	CC(CCCC(C1CCC2C1(C)CCC1=C2CCC2C1(C)CCC(C2(C)C)O)C)C
(9Z,12Z,15Z)-Octadecatrienoyl-CoA	1468007758	CCC=CCC=CCC=CCCCCCCCC(=O)SCCNC(=O)CCNC(=O)C(C(COP(=O)(OP(=O)(OCC1OC(C(C1OP(=O)(O)O)O)n1cnc2c1ncnc2N)O)O)(C)C)O
(6Z,9Z,12Z,15Z)-Octadecatetraenoyl-CoA	1468007768	CCC=CCC=CCC=CCC=CCCCCC(=O)SCCNC(=O)CCNC(=O)C(C(COP(=O)(OP(=O)(OCC1OC(C(C1OP(=O)(O)O)O)n1cnc2c1ncnc2N)O)O)(C)C)O
(8Z,11Z,14Z,17Z)-Icosatetraenoyl-CoA	1468007778	CCC=CCC=CCC=CCC=CCCCCCCC(=O)SCCN=C(CCN=C(C(C(COP(=O)(OP(=O)(OCC1OC(C(C1OP(=O)(O)O)O)n1cnc2c1ncnc2N)O)O)(C)C)O)O)O
(5Z,8Z,11Z,14Z,17Z)-Icosapentaenoyl-CoA	1468007787	CCC=CCC=CCC=CCC=CCC=CCCCC(=O)SCCNC(=O)CCNC(=O)C(C(COP(=O)(OP(=O)(OCC1OC(C(C1OP(=O)(O)O)O)n1cnc2c1ncnc2N)O)O)(C)C)O
(7Z,10Z,13Z,16Z,19Z)-Docosapentaenoyl-CoA	1468007797	CCC=CCC=CCC=CCC=CCC=CCCCCCC(=O)SCCNC(=O)CCNC(=O)C(C(COP(=O)(OP(=O)(OCC1OC(C(C1OP(=O)(O)O)O)n1cnc2c1ncnc2N)O)O)(C)C)O
(9Z,12Z,15Z,18Z,21Z)-Tetracosapentaenoyl-CoA	1468007806	CCC=CCC=CCC=CCC=CCC=CCCCCCCCC(=O)SCCN=C(CCN=C(C(C(COP(=O)(OP(=O)(OCC1OC(C(C1OP(=O)(O)O)O)n1cnc2c1ncnc2N)O)O)(C)C)O)O)O
(6Z,9Z,12Z,15Z,18Z,21Z)-Tetracosahexaenoyl-CoA	1468007815	CCC=CCC=CCC=CCC=CCC=CCC=CCCCCC(=O)SCCNC(=O)CCNC(=O)C(C(COP(=O)(OP(=O)(OCC1OC(C(C1OP(=O)(O)O)O)n1cnc2c1ncnc2N)O)O)(C)C)O
(4Z,7Z,10Z,13Z,16Z,19Z)-Docosahexaenoyl-CoA	1468007824	CCC=CCC=CCC=CCC=CCC=CCC=CCCC(=O)SCCN=C(CCN=C(C(C(COP(=O)(OP(=O)(OCC1OC(C(C1OP(=O)(O)O)O)n1cnc2c1ncnc2N)O)O)(C)C)O)O)O
(7Z,10Z,13Z,16Z)-Docosatetraenoyl-CoA	1468007833	CCCCCC=CCC=CCC=CCC=CCCCCCC(=O)SCCNC(=O)CCNC(=O)C(C(COP(=O)(OP(=O)(OCC1OC(C(C1OP(=O)(O)O)O)n1cnc2c1ncnc2N)O)O)(C)C)O
(9Z,12Z,15Z,18Z)-Tetracosatetraenoyl-CoA	1468007841	CCCCCC=CCC=CCC=CCC=CCCCCCCCC(=O)SCCNC(=O)CCNC(=O)C(C(COP(=O)(OP(=O)(OCC1OC(C(C1OP(=O)(O)O)O)n1cnc2c1ncnc2N)O)O)(C)C)O
(6Z,9Z,12Z,15Z,18Z)-Tetracosapentaenoyl-CoA	1468007850	CCCCCC=CCC=CCC=CCC=CCC=CCCCCC(=O)SCCN=C(CCN=C(C(C(COP(=O)(OP(=O)(OCC1OC(C(C1OP(=O)(O)O)O)n1cnc2c1ncnc2N)O)O)(C)C)O)O)O
(4Z,7Z,10Z,13Z,16Z)-Docosapentaenoyl-CoA	1468007859	CCCCCC=CCC=CCC=CCC=CCC=CCCC(=O)SCCNC(=O)CCNC(=O)C(C(COP(=O)(OP(=O)(OCC1OC(C(C1OP(=O)(O)O)O)n1cnc2c1ncnc2N)O)O)(C)C)O
(11Z,14Z,17Z)-Icosatrienoyl-CoA	1468007899	CCC=CCC=CCC=CCCCCCCCCCC(=O)SCCNC(=O)CCNC(=O)C(C(COP(=O)(OP(=O)(OCC1OC(C(C1OP(=O)(O)O)O)n1cnc2c1ncnc2N)O)O)(C)C)O
(11Z,14Z)-Icosadienoyl-CoA	1468007909	CCCCCC=CCC=CCCCCCCCCCC(=O)SCCN=C(CCN=C(C(C(COP(=O)(OP(=O)(OCC1OC(C(C1OP(=O)(O)O)O)n1cnc2c1ncnc2N)O)O)(C)C)O)O)O
Phenylboronic acid	1468008095	OB(c1ccccc1)O
3-Oxostearoyl-CoA	1468008259	CCCCCCCCCCCCCCCC(=O)CC(=O)SCCNC(=O)CCNC(=O)C(C(COP(=O)(OP(=O)(OCC1OC(C(C1OP(=O)(O)O)O)n1cnc2c1ncnc2N)[O-])[O-])(C)C)O
3-Hydroxyoctadecanoyl-CoA	1468008271	CCCCCCCCCCCCCCCC(CC(=O)SCCNC(=O)CCNC(=O)C(C(COP(=O)(OP(=O)(OCC1OC(C(C1OP(=O)(O)O)O)n1cnc2c1ncnc2N)O)O)(C)C)O)O
(2E)-Octadecenoyl-CoA	1468008283	CCCCCCCCCCCCCCCC=CC(=O)SCCNC(=O)CCNC(=O)C(C(COP(=O)(OP(=O)(OCC1OC(C(C1OP(=O)(O)O)O)n1cnc2c1ncnc2N)O)O)(C)C)O
Lipoyl-AMP	1468008479	O=C(OP(=O)(OCC1OC(C(C1O)O)n1cnc2c1ncnc2N)O)CCCCC1SSCC1
D-Glucuronic acid	1468008547	O=CC(C(C(C(C(=O)O)O)O)O)O
Stearidonic acid	1468009082	CCC=CCC=CCC=CCC=CCCCCC(=O)O
(2E,6Z,9Z,12Z,15Z,18Z,21Z)-Tetracosaheptaenoyl-CoA	1468009846	CCC=CCC=CCC=CCC=CCC=CCC=CCCC=CC(=O)SCCNC(=O)CCNC(=O)C(C(COP(=O)(OP(=O)(OCC1OC(C(C1OP(=O)(O)O)O)n1cnc2c1ncnc2N)O)O)(C)C)O
(3R,6Z,9Z,12Z,15Z,18Z,21Z)-3-Hydroxytetracosahexaenoyl-CoA	1468009855	CCC=CCC=CCC=CCC=CCC=CCC=CCCC(CC(=O)SCCNC(=O)CCNC(=O)C(C(COP(=O)(OP(=O)(OCC1OC(C(C1OP(=O)(O)O)O)n1cnc2c1ncnc2N)O)O)(C)C)O)O
(2E,6Z,9Z,12Z,15Z,18Z)-Tetracosahexaenoyl-CoA	1468009884	CCCCCC=CCC=CCC=CCC=CCC=CCCC=CC(=O)SCCN=C(CCN=C(C(C(COP(=O)(OP(=O)(OCC1OC(C(C1OP(=O)(O)O)O)n1cnc2c1ncnc2N)O)O)(C)C)O)O)O
(3R,6Z,9Z,12Z,15Z,18Z)-3-Hydroxytetracosapentaenoyl-CoA	1468009893	CCCCCC=CCC=CCC=CCC=CCC=CCCC(CC(=O)SCCNC(=O)CCNC(=O)C(C(COP(=O)(OP(=O)(OCC1OC(C(C1OP(=O)(O)O)O)n1cnc2c1ncnc2N)O)O)(C)C)O)O
Palmitoylethanolamide	1468011089	CCCCCCCCCCCCCCCC(=O)NCCO
(7Z,10Z,13Z,16Z,19Z)-Docosapentaenoic acid	1468011101	CCC=CCC=CCC=CCC=CCC=CCCCCCC(=O)O
Icosatrienoic acid	1468011187	CCC=CCC=CCC=CCCCCCCCCCC(=O)O
Icosadienoic acid	1468011225	CCCCCC=CCC=CCCCCCCCCCC(=O)O
Icosenoic acid	1468011240	CCCCCCCCC=CCCCCCCCCCC(=O)O
Adrenic acid	1468011258	CCCCCC=CCC=CCC=CCC=CCCCCCC(=O)O
Docosanoyl-CoA	1468011272	CCCCCCCCCCCCCCCCCCCCCC(=O)SCCNC(=O)CCNC(=O)C(C(COP(=O)(OP(=O)(OCC1OC(C(C1OP(=O)(O)O)O)n1cnc2c1ncnc2N)O)O)(C)C)O
Tetracosanoyl-CoA	1468011282	CCCCCCCCCCCCCCCCCCCCCCCC(=O)SCCN=C(CCN=C(C(C(COP(=O)(OP(=O)(OCC1OC(C(C1OP(=O)(O)O)O)n1cnc2c1ncnc2N)O)O)(C)C)O)O)O
Icosenoyl-CoA	1468011292	CCCCCCCCC=CCCCCCCCCCC(=O)SCCNC(=O)CCNC(=O)C(C(COP(=O)(OP(=O)(OCC1OC(C(C1OP(=O)(O)O)O)n1cnc2c1ncnc2N)O)O)(C)C)O
Docosenoyl-CoA	1468011304	CCCCCCCCC=CCCCCCCCCCCCC(=O)SCCNC(=O)CCNC(=O)C(C(COP(=O)(OP(=O)(OCC1OC(C(C1OP(=O)(O)O)O)n1cnc2c1ncnc2N)O)O)(C)C)O
Tetracosenoyl-CoA	1468011314	CCCCCCCCC=CCCCCCCCCCCCCCC(=O)SCCNC(=O)CCNC(=O)C(C(COP(=O)(OP(=O)(OCC1OC(C(C1OP(=O)(O)O)O)n1cnc2c1ncnc2N)O)O)(C)C)O
(13Z,16Z)-Docosadienoic acid	1468011325	CCCCCC=CCC=CCCCCCCCCCCCC(=O)O
13,16,19-Docosatrienoic acid	1468011337	CCC=CCC=CCC=CCCCCCCCCCCCC(=O)O
Nonadecanoic acid	1468011348	CCCCCCCCCCCCCCCCCCC(=O)O
9E-Heptadecenoic acid	1468011360	CCCCCCCC=CCCCCCCCC(=O)O
Pentadecanoic acid	1468011372	CCCCCCCCCCCCCCC(=O)O
(13Z,16Z)-Docosadienoyl-CoA	1468012388	CCCCCC=CCC=CCCCCCCCCCCCC(=O)SCCNC(=O)CCNC(=O)C(C(COP(=O)(OP(=O)(OCC1OC(C(C1OP(=O)(O)O)O)n1cnc2c1ncnc2N)O)O)(C)C)O
all-trans-4-Hydroxyretinoic acid	1468012684	CC(=CC=CC(=CC(=O)O)C)C=CC1=C(C)C(O)CCC1(C)C
all-trans-4-Oxoretinoic acid	1468012694	CC(=CC=CC(=CC(=O)O)C)C=CC1=C(C)C(=O)CCC1(C)C
all-trans-18-Hydroxyretinoic acid	1468012704	OCC1=C(C=CC(=CC=CC(=CC(=O)O)C)C)C(CCC1)(C)C
all-trans-5,6-Epoxyretinoic acid	1468012713	CC(=CC=CC(=CC(=O)O)C)C=CC12OC2(C)CCCC1(C)C
L-Hydroxylysine	1468013262	NCC(CCC(C(=O)O)N)O
Hydroxyl radical	1468014334	[OH]
Peroxynitrite	1468014345	[O-]ON=O
Tridecanoic acid	1468016491	CCCCCCCCCCCCC(=O)O
7alpha,24-Dihydroxy-4-cholesten-3-one	1468018022	CC(C(CCC(C1CCC2C1(C)CCC1C2C(O)CC2=CC(=O)CCC12C)C)O)C
3beta,7alpha-Dihydroxy-5-cholestenoate	1468018053	OC1CCC2(C(=CC(C3C2CCC2(C3CCC2C(CCCC(C(=O)O)C)C)C)O)C1)C
7alpha,26-Dihydroxy-4-cholesten-3-one	1468018064	OCC(CCCC(C1CCC2C1(C)CCC1C2C(O)CC2=CC(=O)CCC12C)C)C
4-Cholesten-7alpha,12alpha-diol-3-one	1468018085	CC(CCCC(C1CCC2C1(C)C(O)CC1C2C(O)CC2=CC(=O)CCC12C)C)C
Guanidine	1468018124	NC(=[N+])N
alpha-Muricholate	1468021011	OC1CCC2(C(C1)C(O)C(C1C2CCC2(C1CCC2C(CCC(=O)O)C)C)O)C
Heptanoic acid	1468021677	CCCCCCC(=O)O
Undecanoic acid	1468021689	CCCCCCCCCCC(=O)O
Dopamine quinone	1468022055	NCCC1=CC(=O)C(=O)C=C1
2-Descarboxy-cyclo-dopa	1468022065	Oc1cc2NCCc2cc1O
Cysteinyldopa	1468023626	NC(C(=O)O)CSc1cc(CC(C(=O)O)N)cc(c1O)O
5,6-Indolequinone-2-carboxylic acid	1468023651	O=C1C=c2[nH]c(cc2=CC1=O)C(=O)O
(2S)-Ethylmalonyl-CoA	1468024513	CCC(C(=O)SCCN=C(CCN=C(C(C(COP(=O)(OP(=O)(OCC1OC(C(C1OP(=O)(O)O)O)n1cnc2c1ncnc2N)O)O)(C)C)O)O)O)C(=O)O
Cholesterol sulfate	1468024681	CC(CCCC(C1CCC2C1(C)CCC1C2CC=C2C1(C)CCC(C2)OS(=O)(=O)O)C)C
3beta-Hydroxypregn-5-en-20-one sulfate	1468024694	CC(=O)C1CCC2C1(C)CCC1C2CC=C2C1(C)CCC(C2)OS(=O)(=O)O
3-Acetamidopropanal	1468025890	O=CCCNC(=O)C
Resolvin E1	1468025898	CCC(C=CC=CCC(C=CC=CC=CC(CCCC(=O)O)O)O)O
5,6-Epoxy-18R-HEPE	1468025937	CCC(C=CC=CCC=CC=CC=CC1OC1CCCC(=O)O)O
18R-HEPE	1468025956	CCC(C=CC=CCC=CCC=CCC=CCCCC(=O)O)O
16-Hydroxypalmitate	1468026311	OCCCCCCCCCCCCCCCC(=O)O
Calcitroic acid	1468026407	OC(=O)CC(C1CCC2C1(C)CCCC2=CC=C1CC(O)CC(C1=C)O)C
Calcitetrol	1468026417	OC1CC(O)C(=C)C(=CC=C2CCCC3(C2CCC3C(CCC(C(O)(C)C)O)C)C)C1
9,10-Dihydroxybenzo[a]pyrene	1468026832	Oc1ccc2c(c1O)c1ccc3c4c1c(c2)ccc4ccc3
(2S)-Methylsuccinyl-CoA	1468027210	O=C(NCCSC(=O)C(CC(=O)O)C)CCNC(=O)C(C(COP(=O)(OP(=O)(OCC1OC(C(C1OP(=O)(O)O)O)n1cnc2c1ncnc2N)O)O)(C)C)O
Dibenzo[a,l]pyrene	1468034906	c1ccc2c(c1)c1c3ccccc3c3c4c1c(c2)ccc4ccc3
Malonaldehyde	1468037409	O=CCC=O
7,12-Dimethylbenz[a]anthracene	1468037861	Cc1c2ccc3c(c2c(c2c1cccc2)C)cccc3
Aflatoxin B1-exo-8,9-epoxide	1468038770	COc1cc2OC3C(c2c2c1c1CCC(=O)c1c(=O)o2)C1C(O3)O1
Hexadecanedioate	1468039023	OC(=O)CCCCCCCCCCCCCCC(=O)O
22-Hydroxydocosanoate	1468039090	OCCCCCCCCCCCCCCCCCCCCCC(=O)O
Docosanedioate	1468039108	OC(=O)CCCCCCCCCCCCCCCCCCCCC(=O)O
Hypochlorous acid	1468039661	OCl
beta-Carboline	1468043229	c1ccc2c(c1)[nH]c1c2ccnc1
5-Androstene-3,17-dione	1468044025	O=C1CCC2(C(=CCC3C2CCC2(C3CCC2=O)C)C1)C
12(S)-HHT	1468045057	CCCCCC(C=CC=CCC=CCCCC(=O)O)O
Methyl (indol-3-yl)acetate	1468046790	COC(=O)Cc1c[nH]c2c1cccc2
Oleoylethanolamide	1468047923	CCCCCCCCC=CCCCCCCCC(=O)NCCO
Isovalerylcarnitine	1468048184	CC(CC(=O)OC(C[N+](C)(C)C)CC(=O)[O-])C
3-Hydroxyisovalerate	1468048192	OC(=O)CC(O)(C)C
3-Methylcrotonylglycine	1468048200	OC(=O)CNC(=O)C=C(C)C
3-Deoxy-D-glycero-D-galacto-non-2-ulosonic acid	1468048981	OCC(C(C1OC(O)(CC(C1O)O)C(=O)O)O)O
Palmitoleoyl-CoA	1468050008	CCCCCCC=CCCCCCCCC(=O)SCCNC(=O)CCNC(=O)C(C(COP(=O)(OP(=O)(OCC1OC(C(C1OP(=O)(O)O)O)n1cnc2c1ncnc2N)O)O)(C)C)O
Isocaprenoyl-CoA	1468050150	O=C(NCCSC(=O)C=CC(C)C)CCNC(=O)C(C(COP(=O)(OP(=O)(OCC1OC(C(C1OP(=O)(O)O)O)n1cnc2c1ncnc2N)O)O)(C)C)O
F6P	1468057101	OCC(=O)C(C(C(COP(=O)(O)O)O)O)O
Monodehydroascorbate	1468061319	OCC(C1OC(=O)C(=C1[O])O)O
N-acetyl-beta-D-glucosaminyl-(1->3)-beta-D-galactosyl-(1->4)-beta-D-glucosylceramide	1468065018	CCCCCCCCCCCCCC=CC(C(NC(=O)C)COC1OC(CO)C(C(C1O)O)OC1OC(CO)C(C(C1O)OC1OC(CO)C(C(C1NC(=O)C)O)O)O)O
S(8)-glutaryldihydrolipoamide	1468080056	SC(CCSC(=O)CCCC(=O)O)CCCCC(=O)N
D-RIBULOSE-1-P	1468081077	OCC(C(C(=O)COP(=O)(O)O)O)O
ADP-D-Ribose 2'-phosphate	1468088473	OCC1OC(C(C1O)O)OP(=O)(OP(=O)(OCC1OC(C(C1O)OP(=O)(O)O)n1cnc2c1ncnc2N)O)O
N-acetylglycine	1468089412	CC(=O)NCC(=O)O
tricosanoate	1468090339	CCCCCCCCCCCCCCCCCCCCCCC(=O)O
N-acetyl-L-threonine	1468092009	CC(=O)NC(C(=O)O)C(O)C
(S)-3-hydroxyhexacosanoyl-CoA	1468095493	CCCCCCCCCCCCCCCCCCCCCCCC(CC(=O)SCCNC(=O)CCNC(=O)C(C(COP(=O)(OP(=O)(OCC1OC(C(C1OP(=O)(O)O)O)n1cnc2c1ncnc2N)O)O)(C)C)O)O
3-Oxohexacosyl-CoA	1468095501	CCCCCCCCCCCCCCCCCCCCCCCC(=O)CC(=O)SCCNC(=O)CCNC(=O)C(C(COP(=O)(OP(=O)(OCC1OC(C(C1OP(=O)(O)O)O)n1cnc2c1ncnc2N)O)O)(C)C)O
O-(N-acetyl-alpha-D-galactosaminyl)-L-serine	1468095622	OCC1OC(OCC(C(=O)O)N)C(C(C1O)O)NC(=O)C
2-hydroxy-3-methylbutyric acid	1468096473	OC(C(=O)O)C(C)C
nLc6Cer	1468096608	CCCCCCCCCCCCCC=CC(C(NC(=O)C)COC1OC(CO)C(C(C1O)O)OC1OC(CO)C(C(C1O)OC1OC(CO)C(C(C1NC(=O)C)O)OC1OC(CO)C(C(C1O)OC1OC(CO)C(C(C1NC(=O)C)O)OC1OC(CO)C(C(C1O)O)O)O)O)O
progly	1468096615	OC(=O)CNC(=O)C1CCCN1
18-HETE	1468096887	CCC(CCC=CCC=CCC=CCC=CCCCC(=O)O)O
O-oleoylcarnitine	1468097891	CCCCCCCCC=CCCCCCCCC(=O)OC(C[N+](C)(C)C)CC(=O)[O-]
3-hydroxyisovalerylcarnitine	1468097946	[O-]C(=O)CC(C[N+](C)(C)C)OC(=O)CC(O)(C)C
1-stearoyl-sn-glycero-3-phosphocholine	1468098073	CCCCCCCCCCCCCCCCCC(=O)OCC(COP(=O)(OCC[N+](C)(C)C)[O-])O
cholesteryl (7Z,10Z,13Z,16Z,19Z)-docosapentaenoate	1468098081	CCC=CCC=CCC=CCC=CCC=CCCCCCC(=O)OC1CCC2(C(=CCC3C2CCC2(C3CCC2C(CCCC(C)C)C)C)C1)C
1-hexadecanoyl-sn-glycerol	1468098546	CCCCCCCCCCCCCCCC(=O)OCC(CO)O
1-monostearoylglycerol	1468098570	CCCCCCCCCCCCCCCCCC(=O)OCC(CO)O
Sphingomyelin	1468098991	CCCCCCCCCCCCCCCC(=O)NC(C(C=CCCCCCCCCCCCCC)O)COP(=O)(OCC[N+](C)(C)C)[O-]
4,6-dioxoheptanoic acid	1468099594	OC(=O)CCC(=O)CC(=O)C
1-[(7Z,10Z,13Z,16Z)-docosatetraenoyl]-sn-glycero-3-phosphocholine	1468100076	CCCCCC=CCC=CCC=CCC=CCCCCCC(=O)OCC(COP(=O)(OCC[N+](C)(C)C)[O-])O
1-[(7Z,10Z,13Z,16Z,19Z)-docosapentaenoyl]-sn-glycero-3-phosphocholine	1468100090	CCC=CCC=CCC=CCC=CCC=CCCCCCC(=O)OCC(COP(=O)(OCC[N+](C)(C)C)[O-])O
torasemide	1468113941	CC(NC(=O)NS(=O)(=O)c1cnccc1Nc1cccc(c1)C)C
N-acetyl-L-isoleucine	1468118720	CCC(C(C(=O)O)NC(=O)C)C
N-acetyl-L-tyrosine	1468118736	OC(=O)C(Cc1ccc(cc1)O)NC(=O)C
(7Z,10Z,13Z)-hexadecatrienoate	1468119077	CCC=CCC=CCC=CCCCCCC(=O)O
Ca	1468119458	[Ca]
k	1468121586	[K]
Sodium cation	1468121871	[Na]
Zinc cation	1468122419	[Zn]
(2-trans,4-cis)-deca-2,4-dienoyl-CoA	1468122459	CCCCCC=CC=CC(=O)SCCNC(=O)CCNC(=O)C(C(COP(=O)(OP(=O)(OCC1OC(C(C1OP(=O)(O)O)O)n1cnc2c1ncnc2N)O)O)(C)C)O
trans-dec-3-enoyl-CoA	1468122499	CCCCCCC=CCC(=O)SCCNC(=O)CCNC(=O)C(C(COP(=O)(OP(=O)(OCC1OC(C(C1OP(=O)(O)O)O)n1cnc2c1ncnc2N)O)O)(C)C)O
cis-dec-4-enoyl-CoA	1468122571	CCCCCC=CCCC(=O)SCCNC(=O)CCNC(=O)C(C(COP(=O)(OP(=O)(OCC1OC(C(C1OP(=O)(O)O)O)n1cnc2c1ncnc2N)O)O)(C)C)O
cerotate	1468132043	CCCCCCCCCCCCCCCCCCCCCCCCCC(=O)O
gliclazide	1468133509	O=C(NS(=O)(=O)c1ccc(cc1)C)NN1CC2C(C1)CCC2
hpdca	1468135122	CCCCCCCCCCCCCCCCC(=O)O
gadoleate	1468135433	CCCCCCCCCCC=CCCCCCCCC(=O)O
cetoleate	1468135502	CCCCCCCCCCC=CCCCCCCCCCC(=O)O
4-Hydroxynonenal	1468136533	CCCCCC(C=CC=O)O
acetaminophen O-beta-D-glucosiduronate	1468136849	CC(=O)Nc1ccc(cc1)OC1OC(C(=O)O)C(C(C1O)O)O
acetaminophen glutathione conjugate	1468136873	O=C(NC(C(=O)NCC(=O)O)CSc1cc(ccc1O)NC(=O)C)CCC(C(=O)O)N
lithocholic acid sulfate	1468144631	OC(=O)CCC(C1CCC2C1(C)CCC1C2CCC2C1(C)CCC(C2)OS(=O)(=O)O)C
3,3'-diiodo-L-thyronine sulfate	1468144662	NC(C(=O)O)Cc1ccc(c(c1)I)Oc1ccc(c(c1)I)OS(=O)(=O)O
2-methyl-3-hydroxybutyrate	1468149897	CC(C(C(=O)O)C)O
heptanoyl-CoA	1468150580	CCCCCCC(=O)SCCNC(=O)CCNC(=O)C(C(COP(=O)(OP(=O)(OCC1OC(C(C1OP(=O)(O)O)O)n1cnc2c1ncnc2N)O)O)(C)C)O
henicosanoate	1468158224	CCCCCCCCCCCCCCCCCCCCC(=O)O
mqn8|M_mqn8|menaquinone-8	1468161804	CC(=CCCC(=CCCC(=CCCC(=CCC1=C(C)C(=O)c2c(C1=O)cccc2)C)C)C)CCC=C(CCC=C(CCC=C(CCC=C(C)C)C)C)C
Menaquinone-9	1468161891	CC(=CCCC(=CCCC(=CCCC(=CCC1=C(C)C(=O)c2c(C1=O)cccc2)C)C)C)CCC=C(CCC=C(CCC=C(CCC=C(CCC=C(C)C)C)C)C)C
menaquinone-7|mqn7	1468161946	CC(=CCCC(=CCCC(=CCC1=C(C)C(=O)c2c(C1=O)cccc2)C)C)CCC=C(CCC=C(CCC=C(CCC=C(C)C)C)C)C
7alpha,24-dihydroxy-5beta-cholestan-3-one	1468168846	O=C1CCC2(C(C1)CC(C1C2CCC2(C1CCC2C(CCC(C(C)C)O)C)C)O)C
5beta-cholestane-3alpha,7alpha,24-triol	1468168862	OC1CCC2(C(C1)CC(C1C2CCC2(C1CCC2C(CCC(C(C)C)O)C)C)O)C
7alpha,12alpha,24-trihydroxycholest-4-en-3-one	1468168934	CC(C(CCC(C1CCC2C1(C)C(O)CC1C2C(O)CC2=CC(=O)CCC12C)C)O)C
7alpha,12alpha,24-trihydroxy-5beta-cholestan-3-one	1468168942	O=C1CCC2(C(C1)CC(C1C2CC(O)C2(C1CCC2C(CCC(C(C)C)O)C)C)O)C
5beta-cholestane-3alpha,7alpha,12alpha,24-tetrol	1468168980	OC1CCC2(C(C1)CC(C1C2CC(O)C2(C1CCC2C(CCC(C(C)C)O)C)C)O)C
5beta-cholestane-3alpha,7alpha,24,26-tetrol	1468168988	OCC(C(CCC(C1CCC2C1(C)CCC1C2C(O)CC2C1(C)CCC(C2)O)C)O)C
5beta-cholestane-3alpha,7alpha,12alpha,24,26-pentol	1468168996	OCC(C(CCC(C1CCC2C1(C)C(O)CC1C2C(O)CC2C1(C)CCC(C2)O)C)O)C
3alpha,7alpha,24-trihydroxy-5beta-cholestan-26-al	1468169004	O=CC(C(CCC(C1CCC2C1(C)CCC1C2C(O)CC2C1(C)CCC(C2)O)C)O)C
3alpha,7alpha,12alpha,24-tetrahydroxy-5beta-cholestan-26-al	1468169012	O=CC(C(CCC(C1CCC2C1(C)C(O)CC1C2C(O)CC2C1(C)CCC(C2)O)C)O)C
3alpha,7alpha,12alpha,24-tetrahydroxy-5beta-cholestan-26-oate	1468169036	OC1CCC2(C(C1)CC(C1C2CC(O)C2(C1CCC2C(CCC(C(C(=O)O)C)O)C)C)O)C
7alpha,26-dihydroxy-5beta-cholestan-3-one	1468169044	OCC(CCCC(C1CCC2C1(C)CCC1C2C(O)CC2C1(C)CCC(=O)C2)C)C
7alpha,12alpha,26-trihydroxycholest-4-en-3-one	1468169060	OCC(CCCC(C1CCC2C1(C)C(O)CC1C2C(O)CC2=CC(=O)CCC12C)C)C
7alpha,12alpha,26-trihydroxy-5beta-cholestan-3-one	1468169068	OCC(CCCC(C1CCC2C1(C)C(O)CC1C2C(O)CC2C1(C)CCC(=O)C2)C)C
pristanal	1468170516	O=CC(CCCC(CCCC(CCCC(C)C)C)C)C
2,4-dihydroxybenzaldehyde	1468172539	O=Cc1ccc(cc1O)O
S(8)-aminomethyldihydrolipoamide	1468174252	NCSCCC(CCCCC(=O)N)S
2-hydroxyhexadecanal	1468174284	CCCCCCCCCCCCCCC(C=O)O
2-decaprenyl-5-hydroxy-6-methoxy-3-methyl-1,4-benzoquinone	1468174860	COC1=C(O)C(=O)C(=C(C1=O)CC=C(CCC=C(CCC=C(CCC=C(CCC=C(CCC=C(CCC=C(CCC=C(CCC=C(CCC=C(C)C)C)C)C)C)C)C)C)C)C)C
2-decaprenyl-6-methoxy-3-methyl-1,4-benzoquinone	1468174868	COC1=CC(=O)C(=C(C1=O)CC=C(CCC=C(CCC=C(CCC=C(CCC=C(CCC=C(CCC=C(CCC=C(CCC=C(CCC=C(C)C)C)C)C)C)C)C)C)C)C)C
2-decaprenyl-6-methoxy-1,4-benzoquinone	1468174876	COC1=CC(=O)C=C(C1=O)CC=C(CCC=C(CCC=C(CCC=C(CCC=C(CCC=C(CCC=C(CCC=C(CCC=C(CCC=C(C)C)C)C)C)C)C)C)C)C)C
2-decaprenyl-6-methoxyphenol	1468174884	COc1cccc(c1O)CC=C(CCC=C(CCC=C(CCC=C(CCC=C(CCC=C(CCC=C(CCC=C(CCC=C(CCC=C(C)C)C)C)C)C)C)C)C)C)C
3-decaprenyl-4,5-dihydroxybenzoate	1468174892	CC(=CCCC(=CCCC(=CCCC(=CCCC(=CCc1cc(cc(c1O)O)C(=O)O)C)C)C)C)CCC=C(CCC=C(CCC=C(CCC=C(CCC=C(C)C)C)C)C)C
3-decaprenyl-4-hydroxy-5-methoxybenzoate	1468174900	COc1cc(cc(c1O)CC=C(CCC=C(CCC=C(CCC=C(CCC=C(CCC=C(CCC=C(CCC=C(CCC=C(CCC=C(C)C)C)C)C)C)C)C)C)C)C)C(=O)O
pristanate	1468176713	CC(CCCC(C(=O)O)C)CCCC(CCCC(C)C)C
pristanoyl-CoA	1468176721	CC(CCCC(CCCC(C)C)C)CCCC(C(=O)SCCNC(=O)CCNC(=O)C(C(COP(=O)(OP(=O)(OCC1OC(C(C1OP(=O)(O)O)O)n1cnc2c1ncnc2N)O)O)(C)C)O)C
1-oleoyl-sn-glycero-3-phosphate(2-)	1468181808	CCCCCCCCC=CCCCCCCCC(=O)OCC(COP(=O)(O)O)O
3-hydroxyicosanoyl-CoA	1468182054	CCCCCCCCCCCCCCCCCC(CC(=O)SCCN=C(CCN=C(C(C(COP(=O)(OP(=O)(OCC1OC(C(C1OP(=O)(O)O)O)n1cnc2c1ncnc2N)O)O)(C)C)O)O)O)O
3-hydroxydocosanoyl-CoA	1468182062	CCCCCCCCCCCCCCCCCCCC(CC(=O)SCCNC(=O)CCNC(=O)C(C(COP(=O)(OP(=O)(OCC1OC(C(C1OP(=O)(O)O)O)n1cnc2c1ncnc2N)O)O)(C)C)O)O
3-hydroxytetracosanoyl-CoA	1468182070	CCCCCCCCCCCCCCCCCCCCCC(CC(=O)SCCNC(=O)CCNC(=O)C(C(COP(=O)(OP(=O)(OCC1OC(C(C1OP(=O)([O-])[O-])O)n1cnc2c1ncnc2N)[O-])[O-])(C)C)O)O
3-oxoicosanoyl-CoA	1468182078	CCCCCCCCCCCCCCCCCC(=O)CC(=O)SCCN=C(CCN=C(C(C(COP(=O)(OP(=O)(OCC1OC(C(C1OP(=O)(O)O)O)n1cnc2c1ncnc2N)O)O)(C)C)O)O)O
3-Oxodocosanoyl-CoA	1468182086	CCCCCCCCCCCCCCCCCCCC(=O)CC(=O)SCCNC(=O)CCNC(=O)C(C(COP(=O)(OP(=O)(OCC1OC(C(C1OP(=O)(O)O)O)n1cnc2c1ncnc2N)O)O)(C)C)O
3-Oxotetracosanoyl-CoA	1468182094	CCCCCCCCCCCCCCCCCCCCCC(=O)CC(=O)SCCNC(=O)CCNC(=O)C(C(COP(=O)(OP(=O)(OCC1OC(C(C1OP(=O)([O-])[O-])O)n1cnc2c1ncnc2N)[O-])[O-])(C)C)O
zymosterol intermediate 2	1468182387	O=C1CCC2(C(C1)CCC1=C2CCC2(C1CCC2C(CCC=C(C)C)C)C)C
zymosterol intermediate 1a	1468182403	OCC1C(O)CCC2(C1CCC1=C2CCC2(C1CCC2C(CCC=C(C)C)C)C)C
zymosterol intermediate 1b	1468183469	O=CC1C(O)CCC2(C1CCC1=C2CCC2(C1CCC2C(CCC=C(C)C)C)C)C
hexacosanoyl-CoA	1468185453	CCCCCCCCCCCCCCCCCCCCCCCCCC(=O)SCCNC(=O)CCNC(=O)C(C(COP(=O)(OP(=O)(OCC1OC(C(C1OP(=O)(O)O)O)n1cnc2c1ncnc2N)O)O)(C)C)O
trans-2-hexacosenoyl-CoA	1468185516	CCCCCCCCCCCCCCCCCCCCCCCC=CC(=O)SCCNC(=O)CCNC(=O)C(C(COP(=O)(OP(=O)(OCC1OC(C(C1OP(=O)(O)O)O)n1cnc2c1ncnc2N)O)O)(C)C)O
cis-tetradec-7-enoic acid	1468186749	CCCCCCC=CCCCCCC(=O)O
N-acyl-D-homoserine	1468190357	CC(=O)NC(C(=O)O)CCO
(2S,3R)-3-hydroxy-2-methylpentanoic acid	1468190420	CCC(C(C(=O)O)C)O
(2R,3S)-2-hydroxy-3-methylpentanoate	1468191107	CCC(C(C(=O)O)O)C
(E)-4-oxonon-2-enal	1468203357	CCCCCC(=O)C=CC=O
1-octadecanoyl-sn-glycero-3-phospho-D-myo-inositol(1-)	1468209420	CCCCCCCCCCCCCCCCCC(=O)OCC(COP(=O)(OC1C(O)C(O)C(C(C1O)O)O)O)O
L-homocysteine thiolactone	1468211101	O=C1SCCC1N
tyrosyltyrosine	1468214383	Oc1ccc(cc1)CC(C(=O)NC(C(=O)O)Cc1ccc(cc1)O)N
nLc5Cer	1468215852	CCCCCCCCCCCCCC=CC(C(NC(=O)C)COC1OC(CO)C(C(C1O)O)OC1OC(CO)C(C(C1O)OC1OC(CO)C(C(C1NC(=O)C)O)OC1OC(CO)C(C(C1O)OC1OC(CO)C(C(C1O)O)O)O)O)O
alpha-L-Fuc-(1->2)-beta-D-Gal-(1->4)-beta-D-GlcNAc-(1->3)-[alpha-L-Fuc-(1->2)-beta-D-Gal-(1->4)-beta-D-GlcNAc-(1->6)]-beta-D-Gal-(1->4)-beta-D-GlcNAc-(1->3)-beta-D-Gal-(1->4)-beta-D-Glc-(1<->1')-Cer	1468217911	CCCCCCCCCCCCCC=CC(C(NC(=O)C)COC1OC(CO)C(C(C1O)O)OC1OC(CO)C(C(C1O)OC1OC(CO)C(C(C1NC(=O)C)O)OC1OC(COC2OC(CO)C(C(C2NC(=O)C)O)OC2OC(CO)C(C(C2OC2OC(C)C(C(C2O)O)O)O)O)C(C(C1O)OC1OC(CO)C(C(C1NC(=O)C)O)OC1OC(CO)C(C(C1OC1OC(C)C(C(C1O)O)O)O)O)O)O)O
9-O-Ac-alpha-Neu5Ac-(2->8)-alpha-Neu5Ac-(2->3)-beta-D-Gal-(1->4)-beta-D-Glc-(1<->1')-Cer	1468218441	CCCCCCCCCCCCCC=CC(C(NC(=O)C)COC1OC(CO)C(C(C1O)O)OC1OC(CO)C(C(C1O)OC1(CC(O)C(C(O1)C(C(OC1(CC(O)C(C(O1)C(C(COC(=O)C)O)O)NC(=O)C)C(=O)O)CO)O)NC(=O)C)C(=O)O)O)O
VI3NeuAc-nLc6Cer	1468219252	CCCCCCCCCCCCCC=CC(C(NC(=O)C)COC1OC(CO)C(C(C1O)O)OC1OC(CO)C(C(C1O)OC1OC(CO)C(C(C1NC(=O)C)O)OC1OC(CO)C(C(C1O)OC1OC(CO)C(C(C1NC(=O)C)O)OC1OC(CO)C(C(C1O)OC1(CC(O)C(C(O1)C(C(CO)O)O)NC(=O)C)C(=O)O)O)O)O)O
maltopentaose	1468220201	OCC(C(C(C(C=O)O)O)OC1OC(CO)C(C(C1O)O)OC1OC(CO)C(C(C1O)O)OC1OC(CO)C(C(C1O)O)OC1OC(CO)C(C(C1O)O)O)O
beta-D-Gal-(1->4)-beta-D-GlcNAc-(1->3)-beta-D-Gal-(1->4)-beta-D-GlcNAc-(1->3)-beta-D-Gal-(1->4)-beta-D-GlcNAc-(1->3)-beta-D-Gal-(1->4)-beta-D-Glc-(1<->1')-Cer	1468227253	CCCCCCCCCCCCCC=CC(C(NC(=O)C)COC1OC(CO)C(C(C1O)O)OC1OC(CO)C(C(C1O)OC1OC(CO)C(C(C1NC(=O)C)O)OC1OC(CO)C(C(C1O)OC1OC(CO)C(C(C1NC(=O)C)O)OC1OC(CO)C(C(C1O)OC1OC(CO)C(C(C1NC(=O)C)O)OC1OC(CO)C(C(C1O)O)O)O)O)O)O
4-hydroxytolbutamide	1468230983	CCCCNC(=O)NS(=O)(=O)c1ccc(cc1)CO
4-hydroxydebrisoquin	1468230991	NC(=N)N1CC(O)c2c(C1)cccc2
(E)-2,3-didehydropristanoyl-CoA	1468231015	CC(CCC=C(C(=O)SCCNC(=O)CCNC(=O)C(C(COP(=O)(OP(=O)(OCC1OC(C(C1OP(=O)(O)O)O)n1cnc2c1ncnc2N)O)O)(C)C)O)C)CCCC(CCCC(C)C)C
(7Z,10Z,13Z,16Z)-3-oxodocosatetraenoyl-CoA	1468231134	CCCCCC=CCC=CCC=CCC=CCCCC(=O)CC(=O)SCCN=C(CCN=C(C(C(COP(=O)(OP(=O)(OCC1OC(C(C1OP(=O)(O)O)O)n1cnc2c1ncnc2N)O)O)(C)C)O)O)O
pregn-5-ene-3,20-dione	1468231246	O=C1CCC2(C(=CCC3C2CCC2(C3CCC2C(=O)C)C)C1)C
5-Hydroxyomeprazole	1468231270	COc1c(CO)cnc(c1C)CS(=O)c1nc2c([nH]1)ccc(c2)OC
17alpha-hydroxypregn-5-ene-3,20-dione	1468231293	O=C1CCC2(C(=CCC3C2CCC2(C3CCC2(O)C(=O)C)C)C1)C
4-carboxyzymosterol	1468231301	CC(=CCCC(C1CCC2C1(C)CCC1=C2CCC2C1(C)CCC(C2C(=O)O)O)C)C
4,8-dimethylnonanoyl-CoA	1468231389	CC(CCC(=O)SCCNC(=O)CCNC(=O)C(C(COP(=O)(OP(=O)(OCC1OC(C(C1OP(=O)(O)O)O)n1cnc2c1ncnc2N)O)O)(C)C)O)CCCC(C)C
6-hydroxypaclitaxel	1468231413	CC(=O)OC1C(=O)C2(C)C(O)C(O)C3C(C2C(C2(C(C1=C(C)C(OC(=O)C(C(c1ccccc1)NC(=O)c1ccccc1)O)C2)(C)C)O)OC(=O)c1ccccc1)(CO3)OC(=O)C
O-(4,8-dimethylnonanoyl)carnitine	1468231531	CC(CCC(=O)OC(C[N+](C)(C)C)CC(=O)[O-])CCCC(C)C
3-hydroxypristanoyl-CoA	1468231769	CC(CCC(C(C(=O)SCCNC(=O)CCNC(=O)C(C(COP(=O)(OP(=O)(OCC1OC(C(C1OP(=O)(O)O)O)n1cnc2c1ncnc2N)O)O)(C)C)O)C)O)CCCC(CCCC(C)C)C
20-oxoleukotriene B4	1468232135	O=CCCCCC=CCC(C=CC=CC=CC(CCCC(=O)O)O)O
linoleoyl ethanolamide	1468232462	CCCCCC=CCC=CCCCCCCCC(=O)NCCO
4-hydroxy-3-all-trans-decaprenylbenzoate	1468233138	CC(=CCCC(=CCCC(=CCCC(=CCCC(=CCc1cc(ccc1O)C(=O)O)C)C)C)C)CCC=C(CCC=C(CCC=C(CCC=C(CCC=C(C)C)C)C)C)C
2-decaprenyl-6-methoxyhydroquinone	1468233442	COc1cc(O)cc(c1O)CC=C(CCC=C(CCC=C(CCC=C(CCC=C(CCC=C(CCC=C(CCC=C(CCC=C(CCC=C(C)C)C)C)C)C)C)C)C)C)C
2-decaprenyl-6-methoxy-3-methylhydroquinone	1468233450	COc1cc(O)c(c(c1O)CC=C(CCC=C(CCC=C(CCC=C(CCC=C(CCC=C(CCC=C(CCC=C(CCC=C(CCC=C(C)C)C)C)C)C)C)C)C)C)C)C
3-demethylubiquinol-10	1468233458	COc1c(O)c(CC=C(CCC=C(CCC=C(CCC=C(CCC=C(CCC=C(CCC=C(CCC=C(CCC=C(CCC=C(C)C)C)C)C)C)C)C)C)C)C)c(c(c1O)O)C
ubiquinol-10	1468233466	COc1c(O)c(CC=C(CCC=C(CCC=C(CCC=C(CCC=C(CCC=C(CCC=C(CCC=C(CCC=C(CCC=C(C)C)C)C)C)C)C)C)C)C)C)c(c(c1OC)O)C
N-hexanoylglycine	1468234810	CCCCCC(=O)NCC(=O)O
1-arachidonoyl-sn-glycero-3-phosphoethanolamine	1468234825	CCCCCC=CCC=CCC=CCC=CCCCC(=O)OCC(COP(=O)(OCCN)O)O
N-pentadecanoylsphingosine-1-phosphocholine	1468235314	CCCCCCCCCCCCCC=CC(C(NC(=O)CCCCCCCCCCCCCC)COP(=O)(OCC[N+](C)(C)C)[O-])O
N-myristoylsphingosine-1-phosphocholine	1468235322	CCCCCCCCCCCCCC=CC(C(NC(=O)CCCCCCCCCCCCC)COP(=O)(OCC[N+](C)(C)C)[O-])O
N-(9Z-hexadecenoyl)sphingosine-1-phosphocholine	1468235330	CCCCCCCCCCCCCC=CC(C(NC(=O)CCCCCCCC=CCCCCCC)COP(=O)(OCC[N+](C)(C)C)[O-])O
1-myristoyl-sn-glycero-3-phosphocholine	1468235345	CCCCCCCCCCCCCC(=O)OCC(COP(=O)(OCC[N+](C)(C)C)[O-])O
(9Z)-myristoleoyl-CoA	1468238452	CCCCC=CCCCCCCCC(=O)SCCNC(=O)CCNC(=O)C(C(COP(=O)(OP(=O)(OCC1OC(C(C1OP(=O)([O-])[O-])O)n1cnc2c1ncnc2N)[O-])[O-])(C)C)O
(4Z,7Z,10Z,13Z,16Z)-docosapentaenoate	1468238983	CCCCCC=CCC=CCC=CCC=CCC=CCCC(=O)O
o-methylhippuric acid	1468258530	OC(=O)CNC(=O)c1ccccc1C
3-methylglutaric acid	1468259229	CC(CC(=O)O)CC(=O)O
O-adipoylcarnitine	1468259245	O=C(OC(C[N+](C)(C)C)CC(=O)[O-])CCCCC(=O)O
hydroxytyrosol	1468261150	OCCc1ccc(c(c1)O)O
(5Z)-tetradecenoyl-CoA	1468265688	CCCCCCCCC=CCCCC(=O)SCCNC(=O)CCNC(=O)C(C(COP(=O)(OP(=O)(OCC1OC(C(C1OP(=O)(O)O)O)n1cnc2c1ncnc2N)O)O)(C)C)O
cis,cis-tetradeca-5,8-dienoyl-CoA	1468265696	CCCCCC=CCC=CCCCC(=O)SCCNC(=O)CCNC(=O)C(C(COP(=O)(OP(=O)(OCC1OC(C(C1OP(=O)(O)O)O)n1cnc2c1ncnc2N)O)O)(C)C)O
cis-tetradec-5-enoic acid	1468265720	CCCCCCCCC=CCCCC(=O)O
cis,cis-tetradeca-5,8-dienoic acid	1468265743	CCCCCC=CCC=CCCCC(=O)O
O-hexanoylcarnitine	1468265914	CCCCCC(=O)OC(C[N+](C)(C)C)CC(=O)[O-]
3-hydroxysuberic acid	1468266050	OC(=O)CCCCC(CC(=O)O)O
N-isobutyrylglycine	1468267618	CC(C(=O)NCC(=O)O)C
N-isovalerylglycine	1468267650	CC(CC(=O)NCC(=O)O)C
O-tiglylcarnitine	1468269056	CC=C(C(=O)OC(C[N+](C)(C)C)CC(=O)[O-])C
beta-D-GlcpNAc-(1->4)-beta-D-GlcpNAc-(1->4)-beta-D-GlcpNAc	1468270502	OCC1OC(OC2C(CO)OC(C(C2O)NC(=O)C)O)C(C(C1OC1OC(CO)C(C(C1NC(=O)C)O)O)O)NC(=O)C
(8Z,11Z,14Z)-3-oxoicosa-8,11,14-trienoyl-CoA	1468270989	CCCCCC=CCC=CCC=CCCCCC(=O)CC(=O)SCCNC(=O)CCNC(=O)C(C(COP(=O)(OP(=O)(OCC1OC(C(C1OP(=O)([O-])[O-])O)n1cnc2c1ncnc2N)[O-])[O-])(C)C)O
all-cis-8,11,14,17-icosatetraenoate	1468271029	CCC=CCC=CCC=CCC=CCCCCCCC(=O)O
(8Z,11Z,14Z,17Z)-3-oxoicosatetraenoyl-CoA	1468271053	CCC=CCC=CCC=CCC=CCCCCC(=O)CC(=O)SCCNC(=O)CCNC(=O)C(C(COP(=O)(OP(=O)(OCC1OC(C(C1OP(=O)([O-])[O-])O)n1cnc2c1ncnc2N)[O-])[O-])(C)C)O
15-HEPE	1468277498	CCC=CCC(C=CC=CCC=CCC=CCCCC(=O)O)O
15-HETrE	1468277610	CCCCCC(C=CC=CCC=CCCCCCCC(=O)O)O
O-linoelaidylcarnitine	1468278062	CCCCCC=CCC=CCCCCCCCC(=O)OC(C[N+](C)(C)C)CC(=O)[O-]
Phe-Phe	1468278110	NC(C(=O)NC(C(=O)O)Cc1ccccc1)Cc1ccccc1
sulfoglycochenodeoxycholic acid	1468278158	O=C(NCC(=O)O)CCC(C1CCC2C1(C)CCC1C2C(O)CC2C1(C)CCC(C2)OS(=O)(=O)O)C
5-HEPE	1468278600	CCC=CCC=CCC=CCC=CC=CC(CCCC(=O)O)O
1-hexadecanoyl-sn-glycero-3-phospho-D-myo-inositol	1468278800	CCCCCCCCCCCCCCCC(=O)OCC(COP(=O)(OC1C(O)C(O)C(C(C1O)O)O)[O-])O
(5Z,8Z,11Z)-icosatrienoate	1468278980	CCCCCCCCC=CCC=CCC=CCCCC(=O)O
5,15-DiHETE	1468278996	CCCCCC(C=CC=CCC=CC=CC(CCCC(=O)O)O)O
3-hydroxybutyrylcarnitine	1468279774	CC(CC(=O)OC(C[N+](C)(C)C)CC(=O)[O-])O
tiglylglycine	1468279910	CC(=CC)C(=O)NCC(=O)O
O-malonylcarnitine	1468279974	[O-]C(=O)CC(C[N+](C)(C)C)OC(=O)CC(=O)O
O-succinylcarnitine	1468280014	O=C(OC(C[N+](C)(C)C)CC(=O)[O-])CCC(=O)O
O-glutarylcarnitine	1468280054	O=C(OC(C[N+](C)(C)C)CC(=O)[O-])CCCC(=O)O
3-hydroxydecanoylcarnitine	1468280134	CCCCCCCC(CC(=O)OC([N+](C)(C)C)CCC(=O)[O-])O
O-[(5Z)-dodecenoyl]carnitine	1468280150	CCCCCCC=CCCCC(=O)OC([N+](C)(C)C)CCC(=O)[O-]
O-dodecanoylcarnitine	1468280158	CCCCCCCCCCCC(=O)OC(C[N+](C)(C)C)CC(=O)[O-]
3-hydroxydodecanoylcarnitine	1468280174	CCCCCCCCCC(CC(=O)OC(C[N+](C)(C)C)CC(=O)[O-])O
O-sebacoylcarnitine	1468280182	O=C(OC(C[N+](C)(C)C)CC(=O)[O-])CCCCCCCCC(=O)O
(5Z)-tetradecenoylcarnitine	1468280206	CCCCCCCCC=CCCCC(=O)OC(C[N+](C)(C)C)CC(=O)[O-]
O-tetradecanoylcarnitine	1468280214	CCCCCCCCCCCCCC(=O)OC(C[N+](C)(C)C)CC(=O)[O-]
3-hydroxytetradecanoylcarnitine	1468280230	CCCCCCCCCCCC(CC(=O)OC(C[N+](C)(C)C)CC(=O)[O-])O
O-palmitoleoylcarnitine	1468280254	CCCCCCC=CCCCCCCCC(=O)OC(C[N+](C)(C)C)CC(=O)[O-]
O-stearoylcarnitine	1468280310	CCCCCCCCCCCCCCCCCC(=O)OC(C[N+](C)(C)C)CC(=O)[O-]
3-hydroxylinoleoylcarnitine	1468280318	CCCCCC=CCC=CCCCCCC(CC(=O)OC(C[N+](C)(C)C)CC(=O)[O-])O
3-hydroxyoctadecanoylcarnitine	1468280334	CCCCCCCCCCCCCCCC(CC(=O)OC(C[N+](C)(C)C)CC(=O)[O-])O
O-hexadecanedioyl-L-carnitine(1-)	1468280366	OC(=O)CCCCCCCCCCCCCCC(=O)OC(C[N+](C)(C)C)CC(=O)[O-]
O-arachidoylcarnitine	1468280507	CCCCCCCCCCCCCCCCCCCC(=O)OC(C[N+](C)(C)C)CC(=O)[O-]
O-behenoylcarnitine	1468280547	CCCCCCCCCCCCCCCCCCCCCC(=O)OC(C[N+](C)(C)C)CC(=O)[O-]
(11Z)-eicoseneoylcarnitine	1468280643	CCCCCCCCC=CCCCCCCCCCC(=O)OC(C[N+](C)(C)C)CC(=O)[O-]
(11Z,14Z)-eicosadienoylcarnitine	1468280651	CCCCCC=CCC=CCCCCCCCCCC(=O)OC(C[N+](C)(C)C)CC(=O)[O-]
(13Z,16Z)-docosadienoylcarnitine	1468280659	CCCCCC=CCC=CCCCCCCCCCCCC(=O)OC(C[N+](C)(C)C)CC(=O)[O-]
(7Z,10Z,13Z,16Z)-docosatetraenoylcarnitine	1468280675	CCCCCC=CCC=CCC=CCC=CCCCCCC(=O)OC(C[N+](C)(C)C)CC(=O)[O-]
O-[(7Z,10Z,13Z,16Z,19Z)-docosapentaenoyl]carnitine	1468280683	CCC=CCC=CCC=CCC=CCC=CCCCCCC(=O)OC(C[N+](C)(C)C)CC(=O)[O-]
Glu-Leu	1468283135	CC(CC(C(=O)O)NC(=O)C(CCC(=O)O)N)C
Glu-Thr	1468283167	OC(=O)CCC(C(=O)NC(C(=O)O)C(O)C)N
Leu-Val	1468283643	CC(CC(C(=O)NC(C(=O)O)C(C)C)N)C
Leu-Pro	1468283651	CC(CC(C(=O)N1CCCC1C(=O)O)N)C
Leu-Trp	1468283707	CC(CC(C(=O)NC(C(=O)O)Cc1c[nH]c2c1cccc2)N)C
Phe-Asp	1468283984	NC(C(=O)NC(C(=O)O)CC(=O)O)Cc1ccccc1
Phe-Tyr	1468284032	OC(=O)C(Cc1ccc(cc1)O)NC(=O)C(Cc1ccccc1)N
Val-Val	1468284517	CC(C(C(=O)NC(C(=O)O)C(C)C)N)C
Arg-Arg	1468285187	NC(=N)NCCCC(C(=O)NC(C(=O)O)CCCNC(=N)N)N
Asp-Glu	1468285315	OC(=O)CCC(C(=O)O)NC(=O)C(CC(=O)O)N
D-Leu-Gly	1468285411	CC(CC(C(=O)NCC(=O)O)N)C
1-[(9Z)-hexadecenoyl]-sn-glycero-3-phosphocholine	1468285498	CCCCCCC=CCCCCCCCC(=O)OCC(COP(=O)(OCC[N+](C)(C)C)[O-])O
(9Z,12Z,15Z,18Z)-3-oxotetracosatetraenoyl-CoA	1468285546	CCCCCC=CCC=CCC=CCC=CCCCCCC(=O)CC(=O)SCCN=C(CCN=C(C(C(COP(=O)(OP(=O)(OCC1OC(C(C1OP(=O)(O)O)O)n1cnc2c1ncnc2N)O)O)(C)C)O)O)O
(7Z,10Z,13Z,16Z,19Z)-3-oxodocosapentaenoyl-CoA	1468285578	CCC=CCC=CCC=CCC=CCC=CCCCC(=O)CC(=O)SCCN=C(CCN=C(C(C(COP(=O)(OP(=O)(OCC1OC(C(C1OP(=O)(O)O)O)n1cnc2c1ncnc2N)O)O)(C)C)O)O)O
(9Z,12Z,15Z,18Z,21Z)-3-oxotetracosapentaenoyl-CoA	1468285626	CCC=CCC=CCC=CCC=CCC=CCCCCCC(=O)CC(=O)SCCN=C(CCN=C(C(C(COP(=O)(OP(=O)(OCC1OC(C(C1OP(=O)(O)O)O)n1cnc2c1ncnc2N)O)O)(C)C)O)O)O
1-(4Z,7Z,10Z,13Z,16Z,19Z-docosahexaenoyl)-sn-glycero-3-phosphocholine	1468285642	CCC=CCC=CCC=CCC=CCC=CCC=CCCC(=O)OCC(COP(=O)(OCC[N+](C)(C)C)[O-])O
Gly-Phe	1468285937	NCC(=O)NC(C(=O)O)Cc1ccccc1
His-Asp	1468286025	NC(C(=O)NC(C(=O)O)CC(=O)O)Cc1c[nH]cn1
His-Glu	1468286049	OC(=O)CCC(C(=O)O)NC(=O)C(Cc1c[nH]cn1)N
(11Z)-3-oxoicosa-11-enoyl-CoA	1468286658	CCCCCCCCC=CCCCCCCCC(=O)CC(=O)SCCNC(=O)CCNC(=O)C(C(COP(=O)(OP(=O)(OCC1OC(C(C1OP(=O)([O-])[O-])O)n1cnc2c1ncnc2N)[O-])[O-])(C)C)O
3-Oxoeicosa-cis,cis-11,14-dienoyl-CoA	1468286666	CCCCCC=CCC=CCCCCCCCC(=O)CC(=O)SCCN=C(CCN=C(C(C(COP(=O)(OP(=O)(OCC1OC(C(C1OP(=O)(O)O)O)n1cnc2c1ncnc2N)O)O)(C)C)O)O)O
(9Z,12Z)-3-oxolinoleoyl-CoA	1468286674	CCCCCC=CCC=CCCCCCC(=O)CC(=O)SCCNC(=O)CCNC(=O)C(C(COP(=O)(OP(=O)(OCC1OC(C(C1OP(=O)([O-])[O-])O)n1cnc2c1ncnc2N)[O-])[O-])(C)C)O
His-Met	1468286952	CSCCC(C(=O)O)NC(=O)C(Cc1c[nH]cn1)N
(13Z)-3-oxodocosenoyl-CoA	1468287088	CCCCCCCCC=CCCCCCCCCCC(=O)CC(=O)SCCNC(=O)CCNC(=O)C(C(COP(=O)(OP(=O)(OCC1OC(C(C1OP(=O)([O-])[O-])O)n1cnc2c1ncnc2N)[O-])[O-])(C)C)O
(15Z)-3-oxotetracosenoyl-CoA	1468287096	CCCCCCCCC=CCCCCCCCCCCCC(=O)CC(=O)SCCNC(=O)CCNC(=O)C(C(COP(=O)(OP(=O)(OCC1OC(C(C1OP(=O)([O-])[O-])O)n1cnc2c1ncnc2N)[O-])[O-])(C)C)O
cholesteryl (4Z,7Z,10Z,13Z,16Z,19Z)-docosahexaenoate	1468287306	CCC=CCC=CCC=CCC=CCC=CCC=CCCC(=O)OC1CCC2(C(=CCC3C2CCC2(C3CCC2C(CCCC(C)C)C)C)C1)C
O-dodecanedioylcarnitine	1468287458	O=C(OC([N+](C)(C)C)CCC(=O)[O-])CCCCCCCCCCC(=O)O
(17Z)-hexacosenoyl-CoA	1468287554	CCCCCCCCC=CCCCCCCCCCCCCCCCC(=O)SCCNC(=O)CCNC(=O)C(C(COP(=O)(OP(=O)(OCC1OC(C(C1OP(=O)([O-])[O-])O)n1cnc2c1ncnc2N)[O-])[O-])(C)C)O
(11E)-octadecenoyl-CoA	1468288687	CCCCCCC=CCCCCCCCCCC(=O)SCCNC(=O)CCNC(=O)C(C(COP(=O)(OP(=O)(OCC1OC(C(C1OP(=O)([O-])[O-])O)n1cnc2c1ncnc2N)[O-])[O-])(C)C)O
heptadecanoyl-CoA	1468288770	CCCCCCCCCCCCCCCCC(=O)SCCNC(=O)CCNC(=O)C(C(COP(=O)(OP(=O)(OCC1OC(C(C1OP(=O)([O-])[O-])O)n1cnc2c1ncnc2N)[O-])[O-])(C)C)O
(9Z)-heptadecenoyl-CoA	1468288778	CCCCCCCC=CCCCCCCCC(=O)SCCNC(=O)CCNC(=O)C(C(COP(=O)(OP(=O)(OCC1OC(C(C1OP(=O)([O-])[O-])O)n1cnc2c1ncnc2N)[O-])[O-])(C)C)O
pentadecanoyl-CoA	1468288786	CCCCCCCCCCCCCCC(=O)SCCN=C(CCN=C(C(C(COP(=O)(OP(=O)(OCC1OC(C(C1OP(=O)(O)O)O)n1cnc2c1ncnc2N)O)O)(C)C)O)O)O
(13Z,16Z,19Z)-3-oxodocosatrienoyl-CoA	1468288938	CCC=CCC=CCC=CCCCCCCCCCC(=O)CC(=O)SCCNC(=O)CCNC(=O)C(C(COP(=O)(OP(=O)(OCC1OC(C(C1OP(=O)([O-])[O-])O)n1cnc2c1ncnc2N)[O-])[O-])(C)C)O
(10Z,13Z,16Z,19Z)-3-oxodocosatetraenoyl-CoA	1468288962	CCC=CCC=CCC=CCC=CCCCCCCC(=O)CC(=O)SCCN=C(CCN=C(C(C(COP(=O)(OP(=O)(OCC1OC(C(C1OP(=O)(O)O)O)n1cnc2c1ncnc2N)O)O)(C)C)O)O)O
1-heptadecanoyl-sn-glycero-3-phosphocholine	1468289002	CCCCCCCCCCCCCCCCC(=O)OCC(COP(=O)(OCC[N+](C)(C)C)[O-])O
1-arachidonoyl-sn-glycero-3-phosphocholine	1468289018	CCCCCC=CCC=CCC=CCC=CCCCC(=O)OCC(COP(=O)(OCC[N+](C)(C)C)[O-])O
1-[(4Z,7Z,10Z,13Z,16Z)-docosapentaenoyl]-sn-glycero-3-phosphocholine	1468289049	CCCCCC=CCC=CCC=CCC=CCC=CCCC(=O)OCC(COP(=O)(OCC[N+](C)(C)C)[O-])O
(10Z,13Z,16Z)-docosatrienoyl-CoA	1468289604	CCCCCC=CCC=CCC=CCCCCCCCCC(=O)SCCN=C(CCN=C(C(C(COP(=O)(OP(=O)(OCC1OC(C(C1OP(=O)(O)O)O)n1cnc2c1ncnc2N)O)O)(C)C)O)O)O
(10Z,13Z,16Z,19Z)-docosatetraenoyl-CoA	1468289612	CCC=CCC=CCC=CCC=CCCCCCCCCC(=O)SCCNC(=O)CCNC(=O)C(C(COP(=O)(OP(=O)(OCC1OC(C(C1OP(=O)([O-])[O-])O)n1cnc2c1ncnc2N)[O-])[O-])(C)C)O
(12Z,15Z,18Z,21Z)-tetracosatetraenoyl-CoA	1468289620	CCC=CCC=CCC=CCC=CCCCCCCCCCCC(=O)SCCNC(=O)CCNC(=O)C(C(COP(=O)(OP(=O)(OCC1OC(C(C1OP(=O)(O)O)O)n1cnc2c1ncnc2N)O)O)(C)C)O
(10Z,13Z,16Z)-3-oxodocosatrienoyl-CoA	1468289628	CCCCCC=CCC=CCC=CCCCCCCC(=O)CC(=O)SCCN=C(CCN=C(C(C(COP(=O)(OP(=O)(OCC1OC(C(C1OP(=O)(O)O)O)n1cnc2c1ncnc2N)O)O)(C)C)O)O)O
(12Z,15Z,18Z,21Z)-3-oxotetracosatetraenoyl-CoA	1468289636	CCC=CCC=CCC=CCC=CCCCCCCCCC(=O)CC(=O)SCCNC(=O)CCNC(=O)C(C(COP(=O)(OP(=O)(OCC1OC(C(C1OP(=O)([O-])[O-])O)n1cnc2c1ncnc2N)[O-])[O-])(C)C)O
N-docosanoylsphingosine-1-phosphocholine	1468290331	CCCCCCCCCCCCCCCCCCCCCC(=O)NC(C(C=CCCCCCCCCCCCCC)O)COP(=O)(OCC[N+](C)(C)C)[O-]
N-[(13Z)-docosenoyl]sphing-4-enine-1-phosphocholine	1468290339	CCCCCCCCCCCCCC=CC(C(NC(=O)CCCCCCCCCCCC=CCCCCCCCC)COP(=O)(OCC[N+](C)(C)C)[O-])O
Lys-Pro	1468290593	NCCCCC(C(=O)N1CCCC1C(=O)O)N
trans-2-icosenoyl-CoA	1468291425	CCCCCCCCCCCCCCCCCC=CC(=O)SCCNC(=O)CCNC(=O)C(C(COP(=O)(OP(=O)(OCC1OC(C(C1OP(=O)([O-])[O-])O)n1cnc2c1ncnc2N)[O-])[O-])(C)C)O
trans-2-docosenoyl-CoA	1468291433	CCCCCCCCCCCCCCCCCCCC=CC(=O)SCCNC(=O)CCNC(=O)C(C(COP(=O)(OP(=O)(OCC1OC(C(C1OP(=O)([O-])[O-])O)n1cnc2c1ncnc2N)[O-])[O-])(C)C)O
trans-2-tetracosenoyl-CoA	1468291441	CCCCCCCCCCCCCCCCCCCCCC=CC(=O)SCCNC(=O)CCNC(=O)C(C(COP(=O)(OP(=O)(OCC1OC(C(C1OP(=O)([O-])[O-])O)n1cnc2c1ncnc2N)[O-])[O-])(C)C)O
Pro-Phe	1468292109	OC(=O)C(Cc1ccccc1)NC(=O)C1CCCN1
Trp-Lys	1468292659	NCCCCC(C(=O)O)NC(=O)C(Cc1c[nH]c2c1cccc2)N
Trp-Phe	1468292667	NC(C(=O)NC(C(=O)O)Cc1ccccc1)Cc1c[nH]c2c1cccc2
Tyr-Ala	1468292707	O=C(C(Cc1ccc(cc1)O)N)NC(C(=O)O)C
Tyr-Glu	1468292737	OC(=O)CCC(C(=O)O)NC(=O)C(Cc1ccc(cc1)O)N
(10Z)-heptadecenoate	1468294030	CCCCCCC=CCCCCCCCCC(=O)O
nonadecanoyl-CoA	1468294094	CCCCCCCCCCCCCCCCCCC(=O)SCCNC(=O)CCNC(=O)C(C(COP(=O)(OP(=O)(OCC1OC(C(C1OP(=O)([O-])[O-])O)n1cnc2c1ncnc2N)[O-])[O-])(C)C)O
beta-D-galactosyl-N-(tetracosanoyl)sphingosine	1468294529	CCCCCCCCCCCCCCCCCCCCCCCC(=O)NC(C(C=CCCCCCCCCCCCCC)O)COC1OC(CO)C(C(C1O)O)O
1-oleoylglycerol	1468295554	CCCCCCCCC=CCCCCCCCC(=O)OCC(CO)O
Gly-His-Lys	1468296168	NCCCCC(C(=O)O)NC(=O)C(Cc1nc[nH]c1)NC(=O)CN
1-linoleoyl-sn-glycerol	1468297023	CCCCCC=CCC=CCCCCCCCC(=O)OCC(CO)O
2-oleoyl-sn-glycero-3-phosphocholine	1468300109	CCCCCCCCC=CCCCCCCCC(=O)OC(COP(=O)(OCC[N+](C)(C)C)[O-])CO
2-linoleoyl-sn-glycero-3-phosphoethanolamine	1468300244	CCCCCC=CCC=CCCCCCCCC(=O)OC(COP(=O)(OCC[NH3+])[O-])CO
sapienate	1468301020	CCCCCCCCCC=CCCCCC(=O)[O-]
trans-2-nonenoyl-CoA	1468301683	CCCCCCC=CC(=O)SCCNC(=O)CCNC(=O)C(C(COP(=O)(OP(=O)(OCC1OC(C(C1OP(=O)([O-])[O-])O)n1cnc2c1ncnc2N)[O-])[O-])(C)C)O
dodecanedioyl-CoA	1468301834	[O-]P(=O)(OC1C(COP(=O)(OP(=O)(OCC(C(C(=O)NCCC(=O)NCCSC(=O)CCCCCCCCCCC(=O)[O-])O)(C)C)[O-])[O-])OC(C1O)n1cnc2c1ncnc2N)[O-]
decanedioyl-CoA	1468301842	O=C(NCCSC(=O)CCCCCCCCC(=O)[O-])CCNC(=O)C(C(COP(=O)(OP(=O)(OCC1OC(C(C1OP(=O)([O-])[O-])O)n1cnc2c1ncnc2N)[O-])[O-])(C)C)O
octanedioyl-CoA	1468301850	O=C(NCCSC(=O)CCCCCCC(=O)[O-])CCNC(=O)C(C(COP(=O)(OP(=O)(OCC1OC(C(C1OP(=O)([O-])[O-])O)n1cnc2c1ncnc2N)[O-])[O-])(C)C)O
(3R,11Z)-3-hydroxyicosenoyl-CoA	1468302359	CCCCCCCCC=CCCCCCCCC(CC(=O)SCCNC(=O)CCNC(=O)C(C(COP(=O)(OP(=O)(OCC1OC(C(C1OP(=O)([O-])[O-])O)n1cnc2c1ncnc2N)[O-])[O-])(C)C)O)O
(2E,11Z)-icosadienoyl-CoA	1468302367	CCCCCCCCC=CCCCCCCCC=CC(=O)SCCNC(=O)CCNC(=O)C(C(COP(=O)(OP(=O)(OCC1OC(C(C1OP(=O)([O-])[O-])O)n1cnc2c1ncnc2N)[O-])[O-])(C)C)O
(3R,13Z)-3-hydroxydocosenoyl-CoA	1468302375	CCCCCCCCC=CCCCCCCCCCC(CC(=O)SCCNC(=O)CCNC(=O)C(C(COP(=O)(OP(=O)(OCC1OC(C(C1OP(=O)([O-])[O-])O)n1cnc2c1ncnc2N)[O-])[O-])(C)C)O)O
(2E,13Z)-docosadienoyl-CoA	1468302383	CCCCCCCCC=CCCCCCCCCCC=CC(=O)SCCNC(=O)CCNC(=O)C(C(COP(=O)(OP(=O)(OCC1OC(C(C1OP(=O)([O-])[O-])O)n1cnc2c1ncnc2N)[O-])[O-])(C)C)O
(3R,15Z)-3-hydroxytetracosenoyl-CoA	1468302391	CCCCCCCCC=CCCCCCCCCCCCC(CC(=O)SCCNC(=O)CCNC(=O)C(C(COP(=O)(OP(=O)(OCC1OC(C(C1OP(=O)([O-])[O-])O)n1cnc2c1ncnc2N)[O-])[O-])(C)C)O)O
(2E,15Z)-tetracosadienoyl-CoA	1468302399	CCCCCCCCC=CCCCCCCCCCCCC=CC(=O)SCCNC(=O)CCNC(=O)C(C(COP(=O)(OP(=O)(OCC1OC(C(C1OP(=O)([O-])[O-])O)n1cnc2c1ncnc2N)[O-])[O-])(C)C)O
(3R,11Z,14Z)-3-hydroxyicosadienoyl-CoA	1468302477	CCCCCC=CCC=CCCCCCCCC(CC(=O)SCCN=C(CCN=C(C(C(COP(=O)(OP(=O)(OCC1OC(C(C1OP(=O)(O)O)O)n1cnc2c1ncnc2N)O)O)(C)C)O)O)O)O
(2E,11Z,14Z)-icosatrienoyl-CoA	1468302485	CCCCCC=CCC=CCCCCCCCC=CC(=O)SCCNC(=O)CCNC(=O)C(C(COP(=O)(OP(=O)(OCC1OC(C(C1OP(=O)([O-])[O-])O)n1cnc2c1ncnc2N)[O-])[O-])(C)C)O
(3R,8Z,11Z,14Z)-3-hydroxyicosatrienoyl-CoA	1468302501	CCCCCC=CCC=CCC=CCCCCC(CC(=O)SCCNC(=O)CCNC(=O)C(C(COP(=O)(OP(=O)(OCC1OC(C(C1OP(=O)([O-])[O-])O)n1cnc2c1ncnc2N)[O-])[O-])(C)C)O)O
(2E,8Z,11Z,14Z)-icosatetraenoyl-CoA	1468302509	CCCCCC=CCC=CCC=CCCCCC=CC(=O)SCCNC(=O)CCNC(=O)C(C(COP(=O)(OP(=O)(OCC1OC(C(C1OP(=O)([O-])[O-])O)n1cnc2c1ncnc2N)[O-])[O-])(C)C)O
(3R,7Z,10Z,13Z,16Z)-3-hydroxydocosatetraenoyl-CoA	1468302517	CCCCCC=CCC=CCC=CCC=CCCCC(CC(=O)SCCNC(=O)CCNC(=O)C(C(COP(=O)(OP(=O)(OCC1OC(C(C1OP(=O)([O-])[O-])O)n1cnc2c1ncnc2N)[O-])[O-])(C)C)O)O
2E,7Z,10Z,13Z,16Z-Docosapentaenoyl-CoA	1468302525	CCCCCC=CCC=CCC=CCC=CCCCC=CC(=O)SCCNC(=O)CCNC(=O)C(C(COP(=O)(OP(=O)(OCC1OC(C(C1OP(=O)(O)O)O)n1cnc2c1ncnc2N)O)O)(C)C)O
alloxan	1468302789	O=C1NC(=O)C(=O)C(=O)N1
(2E,11Z,14Z,17Z)-icosatetraenoyl-CoA	1468302829	CCC=CCC=CCC=CCCCCCCCC=CC(=O)SCCNC(=O)CCNC(=O)C(C(COP(=O)(OP(=O)(OCC1OC(C(C1OP(=O)([O-])[O-])O)n1cnc2c1ncnc2N)[O-])[O-])(C)C)O
(3R,8Z,11Z,14Z,17Z)-3-hydroxyicosatetraenoyl-CoA	1468302837	CCC=CCC=CCC=CCC=CCCCCC(CC(=O)SCCNC(=O)CCNC(=O)C(C(COP(=O)(OP(=O)(OCC1OC(C(C1OP(=O)([O-])[O-])O)n1cnc2c1ncnc2N)[O-])[O-])(C)C)O)O
(2E,8Z,11Z,14Z,17Z)-icosapentaenoyl-CoA	1468302845	CCC=CCC=CCC=CCC=CCCCCC=CC(=O)SCCNC(=O)CCNC(=O)C(C(COP(=O)(OP(=O)(OCC1OC(C(C1OP(=O)([O-])[O-])O)n1cnc2c1ncnc2N)[O-])[O-])(C)C)O
(3R,7Z,10Z,13Z,16Z,19Z)-3-hydroxydocosapentaenoyl-CoA	1468302861	CCC=CCC=CCC=CCC=CCC=CCCCC(CC(=O)SCCN=C(CCN=C(C(C(COP(=O)(OP(=O)(OCC1OC(C(C1OP(=O)(O)O)O)n1cnc2c1ncnc2N)O)O)(C)C)O)O)O)O
(2E,7Z,10Z,13Z,16Z,19Z)-docosahexaenoyl-CoA	1468302869	CCC=CCC=CCC=CCC=CCC=CCCCC=CC(=O)SCCNC(=O)CCNC(=O)C(C(COP(=O)(OP(=O)(OCC1OC(C(C1OP(=O)([O-])[O-])O)n1cnc2c1ncnc2N)[O-])[O-])(C)C)O
(11Z)-3-oxooctadecenoyl-CoA	1468303482	CCCCCCC=CCCCCCCCC(=O)CC(=O)SCCNC(=O)CCNC(=O)C(C(COP(=O)(OP(=O)(OCC1OC(C(C1OP(=O)([O-])[O-])O)n1cnc2c1ncnc2N)[O-])[O-])(C)C)O
(3R,11Z)-3-hydroxyoctadecenoyl-CoA	1468303498	CCCCCCC=CCCCCCCCC(CC(=O)SCCNC(=O)CCNC(=O)C(C(COP(=O)(OP(=O)(OCC1OC(C(C1OP(=O)([O-])[O-])O)n1cnc2c1ncnc2N)[O-])[O-])(C)C)O)O
(2E,11Z)-octadecadienoyl-CoA	1468303506	CCCCCCC=CCCCCCCCC=CC(=O)SCCNC(=O)CCNC(=O)C(C(COP(=O)(OP(=O)(OCC1OC(C(C1OP(=O)([O-])[O-])O)n1cnc2c1ncnc2N)[O-])[O-])(C)C)O
(13Z)-3-oxoicosenoyl-CoA	1468303514	CCCCCCC=CCCCCCCCCCC(=O)CC(=O)SCCNC(=O)CCNC(=O)C(C(COP(=O)(OP(=O)(OCC1OC(C(C1OP(=O)([O-])[O-])O)n1cnc2c1ncnc2N)[O-])[O-])(C)C)O
(3R,13Z)-3-hydroxyicosenoyl-CoA	1468303530	CCCCCCC=CCCCCCCCCCC(CC(=O)SCCNC(=O)CCNC(=O)C(C(COP(=O)(OP(=O)(OCC1OC(C(C1OP(=O)([O-])[O-])O)n1cnc2c1ncnc2N)[O-])[O-])(C)C)O)O
(2E,13Z)-icosadienoyl-CoA	1468303538	CCCCCCC=CCCCCCCCCCC=CC(=O)SCCNC(=O)CCNC(=O)C(C(COP(=O)(OP(=O)(OCC1OC(C(C1OP(=O)([O-])[O-])O)n1cnc2c1ncnc2N)[O-])[O-])(C)C)O
(13Z)-icosenoyl-CoA	1468303546	CCCCCCC=CCCCCCCCCCCCC(=O)SCCNC(=O)CCNC(=O)C(C(COP(=O)(OP(=O)(OCC1OC(C(C1OP(=O)([O-])[O-])O)n1cnc2c1ncnc2N)[O-])[O-])(C)C)O
14-hydroxymyristate	1468305489	OCCCCCCCCCCCCCC(=O)[O-]
O-suberoylcarnitine(1-)	1468305817	[O-]C(=O)CCCCCCC(=O)OC(C[N+](C)(C)C)CC(=O)[O-]
tetradecanedioyl-CoA	1468305825	O=C(NCCSC(=O)CCCCCCCCCCCCC(=O)[O-])CCNC(=O)C(C(COP(=O)(OP(=O)(OCC1OC(C(C1OP(=O)([O-])[O-])O)n1cnc2c1ncnc2N)[O-])[O-])(C)C)O
hexadecanedioyl-CoA	1468305833	O=C(CCNC(=O)C(C(COP(=O)(OP(=O)(OCC1OC(C(C1OP(=O)([O-])[O-])O)n1cnc2c1ncnc2N)[O-])[O-])(C)C)O)NCCSC(=O)CCCCCCCCCCCCCCC(=O)[O-]
(9Z,12Z,15Z,18Z,21Z)-tetracosapentaenoate	1468306543	CCC=CCC=CCC=CCC=CCC=CCCCCCCCC(=O)[O-]
(6Z,9Z,12Z,15Z,18Z,21Z)-tetracosahexaenoate	1468306551	CCC=CCC=CCC=CCC=CCC=CCC=CCCCCC(=O)[O-]
(17Z)-hexacosenoate	1468306695	CCCCCCCCC=CCCCCCCCCCCCCCCCC(=O)[O-]
(6Z,9Z,12Z,15Z,18Z)-tetracosapentaenoate	1468306751	CCCCCC=CCC=CCC=CCC=CCC=CCCCCC(=O)[O-]
12dgr	1468307922	CCCCCCCCCCCC(=O)OCC(OC(=O)CCCCCCCCCCC)CO
trans-2-pentadecenoyl-CoA	1468308970	CCCCCCCCCCCCC=CC(=O)SCCNC(=O)CCNC(=O)C(C(COP(=O)(OP(=O)(OCC1OC(C(C1OP(=O)([O-])[O-])O)n1cnc2c1ncnc2N)[O-])[O-])(C)C)O
undecanoyl-CoA	1468308986	CCCCCCCCCCC(=O)SCCNC(=O)CCNC(=O)C(C(COP(=O)(OP(=O)(OCC1OC(C(C1OP(=O)([O-])[O-])O)n1cnc2c1ncnc2N)[O-])[O-])(C)C)O
trans-2-undecenoyl-CoA	1468308994	CCCCCCCCC=CC(=O)SCCNC(=O)CCNC(=O)C(C(COP(=O)(OP(=O)(OCC1OC(C(C1OP(=O)([O-])[O-])O)n1cnc2c1ncnc2N)[O-])[O-])(C)C)O
trans-2-heptadecenoyl-CoA	1468309010	CCCCCCCCCCCCCCC=CC(=O)SCCNC(=O)CCNC(=O)C(C(COP(=O)(OP(=O)(OCC1OC(C(C1OP(=O)([O-])[O-])O)n1cnc2c1ncnc2N)[O-])[O-])(C)C)O
(2E,9E)-octadecadienoyl-CoA	1468309018	CCCCCCCCC=CCCCCCC=CC(=O)SCCNC(=O)CCNC(=O)C(C(COP(=O)(OP(=O)(OCC1OC(C(C1OP(=O)([O-])[O-])O)n1cnc2c1ncnc2N)[O-])[O-])(C)C)O
(2E,9Z,12Z)-octadecatrienoyl-CoA	1468309058	CCCCCC=CCC=CCCCCCC=CC(=O)SCCNC(=O)CCNC(=O)C(C(COP(=O)(OP(=O)(OCC1OC(C(C1OP(=O)([O-])[O-])O)n1cnc2c1ncnc2N)[O-])[O-])(C)C)O
(2E,4Z,7Z,10Z,13Z,16Z,19Z)-docosaheptaenoyl-CoA(4-)	1468309066	CCC=CCC=CCC=CCC=CCC=CCC=CC=CC(=O)SCCNC(=O)CCNC(=O)C(C(COP(=O)(OP(=O)(OCC1OC(C(C1OP(=O)([O-])[O-])O)n1cnc2c1ncnc2N)[O-])[O-])(C)C)O
3beta-hydroxy-7-oxo-5beta-cholan-24-oate	1468315947	OC1CCC2(C(C1)CC(=O)C1C2CCC2(C1CCC2C(CCC(=O)[O-])C)C)C
(8Z,11Z)-icosadienoyl-CoA	1468316383	CCCCCCCCC=CCC=CCCCCCCC(=O)SCCNC(=O)CCNC(=O)C(C(COP(=O)(OP(=O)(OCC1OC(C(C1OP(=O)([O-])[O-])O)n1cnc2c1ncnc2N)[O-])[O-])(C)C)O
(6Z,9Z)-octadecadienoate	1468316579	CCCCCCCCC=CCC=CCCCCC(=O)[O-]
(8Z,11Z)-icosadienoic acid	1468316587	CCCCCCCCC=CCC=CCCCCCCC(=O)O
5-hydroxyhexanoate	1468317356	CC(CCCC(=O)O)O
4,4-dimethyl-8,14-cholestadien-3beta-ol	1468317748	CC(CCCC(C1CC=C2C1(C)CCC1=C2CCC2C1(C)CCC(C2(C)C)O)C)C
(7R)-7-hydroxyoctanoic acid	1468317902	CC(CCCCCC(=O)O)O
trans-2-pentadecenoic acid	1468318232	CCCCCCCCCCCCC=CC(=O)O
(13Z)-octadecenoate	1468323307	CCCCC=CCCCCCCCCCCCC(=O)O
cholesteryl stearate	1468324225	CCCCCCCCCCCCCCCCCC(=O)OC1CCC2(C(=CCC3C2CCC2(C3CCC2C(CCCC(C)C)C)C)C1)C
cholesteryl arachidonate	1468324233	CCCCCC=CCC=CCC=CCC=CCCCC(=O)OC1CCC2(C(=CCC3C2CCC2(C3CCC2C(CCCC(C)C)C)C)C1)C
(10Z,13Z,16Z)-docosatrienoate	1468325190	CCCCCC=CCC=CCC=CCCCCCCCCC(=O)[O-]
p-cresol sulfate	1468325278	Cc1ccc(cc1)OS(=O)(=O)O
1,2-di[(4Z,7Z,10Z,13Z,16Z,19Z)-docosahexaenoyl]-sn-glycerol	1468325353	CCC=CCC=CCC=CCC=CCC=CCC=CCCC(=O)OCC(OC(=O)CCC=CCC=CCC=CCC=CCC=CCC=CCC)CO
androsterone sulfate	1468326097	O=C1CCC2C1(C)CCC1C2CCC2C1(C)CCC(C2)OS(=O)(=O)O
1-arachidonoyl-sn-glycero-3-phospho-1D-myo-inositol	1468326191	CCCCCC=CCC=CCC=CCC=CCCCC(=O)OCC(COP(=O)(OC1C(O)C(O)C(C(C1O)O)O)O)O
1-[(11Z,14Z)]-icosadienoyl-sn-glycero-3-phosphocholine	1468326207	CCCCCC=CCC=CCCCCCCCCCC(=O)OCC(COP(=O)(OCC[N+](C)(C)C)[O-])O
Sphingomyelin	1468328083	CCCCCCCCCCCCCCCCCC(=O)NC(C(C=CCCCCCCCCCCCCC)O)COP(=O)(OCC[N+](C)(C)C)[O-]
N-icosanoylsphingosine-1-phosphocholine	1468328091	CCCCCCCCCCCCCCCCCCCC(=O)NC(C(C=CCCCCCCCCCCCCC)O)COP(=O)(OCC[N+](C)(C)C)[O-]
N-tricosanoylsphing-4-enine-1-phosphocholine	1468331605	CCCCCCCCCCCCCCCCCCCCCCC(=O)NC(C(C=CCCCCCCCCCCCCC)O)COP(=O)(OCC[N+](C)(C)C)[O-]
tridecanoyl-CoA	1468332702	CCCCCCCCCCCCC(=O)SCCNC(=O)CCNC(=O)C(C(COP(=O)(OP(=O)(OCC1OC(C(C1OP(=O)([O-])[O-])O)n1cnc2c1ncnc2N)[O-])[O-])(C)C)O
testosterone sulfate	1468332898	O=C1CCC2(C(=C1)CCC1C2CCC2(C1CCC2OS(=O)(=O)O)C)C
2,6-dimethylheptanoyl carnitine	1468332906	CC(CCCC(C(=O)OC(C[N+](C)(C)C)CC(=O)[O-])C)C
cholesteryl myristate	1468334261	CCCCCCCCCCCCCC(=O)OC1CCC2(C(=CCC3C2CCC2(C3CCC2C(CCCC(C)C)C)C)C1)C
cholesteryl pentadecanoate	1468334365	CCCCCCCCCCCCCCC(=O)OC1CCC2(C(=CCC3C2CCC2(C3CCC2C(CCCC(C)C)C)C)C1)C
cholesteryl palmitoleate	1468334397	CCCCCCC=CCCCCCCCC(=O)OC1CCC2(C(=CCC3C2CCC2(C3CCC2C(CCCC(C)C)C)C)C1)C
cholesteryl heptadecanoate	1468334421	CCCCCCCCCCCCCCCCC(=O)OC1CCC2(C(=CCC3C2CCC2(C3CCC2C(CCCC(C)C)C)C)C1)C
cholesteryl (9Z)-heptadecenoate	1468334445	CCCCCCCC=CCCCCCCCC(=O)OC1CCC2(C(=CCC3C2CCC2(C3CCC2C(CCCC(C)C)C)C)C1)C
cholesteryl linolenate	1468334509	CCC=CCC=CCC=CCCCCCCCC(=O)OC1CCC2(C(=CCC3C2CCC2(C3CCC2C(CCCC(C)C)C)C)C1)C
cholesteryl all-cis-icosa-8,11,14-trienoate	1468334549	CCCCCC=CCC=CCC=CCCCCCCC(=O)OC1CCC2(C(=CCC3C2CCC2(C3CCC2C(CCCC(C)C)C)C)C1)C
cholesteryl behenate	1468334587	CCCCCCCCCCCCCCCCCCCCCC(=O)OC1CCC2(C(=CCC3C2CCC2(C3CCC2C(CCCC(C)C)C)C)C1)C
N-heneicosanoylsphingosine-1-phosphocholine	1468335510	CCCCCCCCCCCCCCCCCCCCC(=O)NC(C(C=CCCCCCCCCCCCCC)O)COP(=O)(OCC[N+](C)(C)C)[O-]
N-oleoylsphingosine-1-phosphocholine	1468335534	CCCCCCCCCCCCCC=CC(C(NC(=O)CCCCCCCC=CCCCCCCCC)COP(=O)(OCC[N+](C)(C)C)[O-])O
N-heptadecanoylsphingosine-1-phosphocholine	1468335542	CCCCCCCCCCCCCCCCC(=O)NC(C(C=CCCCCCCCCCCCCC)O)COP(=O)(OCC[N+](C)(C)C)[O-]
1-heptadecanoyl-sn-glycero-3-phosphoethanolamine	1468335558	CCCCCCCCCCCCCCCCC(=O)OCC(COP(=O)(OCC[NH3+])[O-])O
N-tetracosanoylsphinganine-1-phosphocholine	1468335595	CCCCCCCCCCCCCCCCCCCCCCCC(=O)NC(C(CCCCCCCCCCCCCCC)O)COP(=O)(OCC[N+](C)(C)C)[O-]
O-[(9Z)-tetradecenoyl]-L-carnitine	1468336682	CCCCC=CCCCCCCCC(=O)OC(C[N+](C)(C)C)CC(=O)[O-]
trans-3-hexenoyl-CoA	1468337612	CCC=CCC(=O)SCCNC(=O)CCNC(=O)C(C(COP(=O)(OP(=O)(OCC1OC(C(C1OP(=O)([O-])[O-])O)n1cnc2c1ncnc2N)[O-])[O-])(C)C)O
(3E,7Z,10Z,13Z,16Z,19Z)-docosahexaenoyl-CoA	1468337620	CCC=CCC=CCC=CCC=CCC=CCCC=CCC(=O)SCCNC(=O)CCNC(=O)C(C(COP(=O)(OP(=O)(OCC1OC(C(C1OP(=O)([O-])[O-])O)n1cnc2c1ncnc2N)[O-])[O-])(C)C)O
2,6-dimethylheptanoyl-CoA	1468337980	CC(CCCC(C(=O)SCCNC(=O)CCNC(=O)C(C(COP(=O)(OP(=O)(OCC1OC(C(C1OP(=O)([O-])[O-])O)n1cnc2c1ncnc2N)[O-])[O-])(C)C)O)C)C
cholesteryl (5Z,8Z,11Z,14Z,17Z-eicosapentaenoate)	1468338900	CCC=CCC=CCC=CCC=CCC=CCCCC(=O)OC1CCC2(C(=CCC3C2CCC2(C3CCC2C(CCCC(C)C)C)C)C1)C
(2E,4E,8Z,11Z,14Z)-icosapentaenoyl-CoA	1468339639	CCCCCC=CCC=CCC=CCCC=CC=CC(=O)SCCNC(=O)CCNC(=O)C(C(COP(=O)(OP(=O)(OCC1OC(C(C1OP(=O)([O-])[O-])O)n1cnc2c1ncnc2N)[O-])[O-])(C)C)O
N-(4Z,7Z,10Z,13Z,16Z,19Z)-docosahexaenoylethanolamine	1468340678	OCCNC(=O)CCC=CCC=CCC=CCC=CCC=CCC=CCC
N-(tetradecanoyl)ethanolamine	1468340734	CCCCCCCCCCCCCC(=O)NCCO
N-(dodecanoyl)ethanolamine	1468340742	CCCCCCCCCCCC(=O)NCCO
N-(octadecanoyl)ethanolamine	1468341006	CCCCCCCCCCCCCCCCCC(=O)NCCO
(2E)-hexadecenoylcarnitine	1468346211	CCCCCCCCCCCCCC=CC(=O)OC(C[N+](C)(C)C)CC(=O)[O-]
1-[(8Z,11Z,14Z)-icosatrienoyl]-sn-glycero-3-phosphocholine	1468347872	CCCCCC=CCC=CCC=CCCCCCCC(=O)OCC(COP(=O)(OCC[N+](C)(C)C)[O-])O
1-[(8Z,11Z,14Z,17Z)-icosatetraenoyl]-sn-glycero-3-phosphocholine	1468347895	CCC=CCC=CCC=CCC=CCCCCCCC(=O)OCC(COP(=O)(OCC[N+](C)(C)C)[O-])O
1-tetracosanoyl-sn-glycero-3-phosphocholine	1468347903	CCCCCCCCCCCCCCCCCCCCCCCC(=O)OCC(COP(=O)(OCC[N+](C)(C)C)[O-])O
25-hydroxyvitamin D2	1468348297	OC1CCC(=C)C(=CC=C2CCCC3(C2CCC3C(C=CC(C(O)(C)C)C)C)C)C1
1alpha,25-dihydroxyvitamin D2	1468348305	OC1CC(O)C(=C)C(=CC=C2CCCC3(C2CCC3C(C=CC(C(O)(C)C)C)C)C)C1
2-methyl-3-ketovaleric acid	1468348592	CC(C(=O)O)C(=O)CC
N-(2-methylbutanoyl)glycine	1468348600	CC(C(=O)NCC(=O)O)CC
4alpha-hydroxymethyl-4beta-methyl-5alpha-8-cholesten-3beta-ol	1468350717	OCC1(C)C(O)CCC2(C1CCC1=C2CCC2(C1CCC2C(CCCC(C)C)C)C)C
4alpha-formyl-4beta-methyl-5alpha-8-cholesten-3beta-ol	1468350725	O=CC1(C)C(O)CCC2(C1CCC1=C2CCC2(C1CCC2C(CCCC(C)C)C)C)C
3beta-hydroxy-4beta-methyl-5alpha-cholest-8-ene-4alpha-carboxylate	1468350733	CC(CCCC(C1CCC2C1(C)CCC1=C2CCC2C1(C)CCC(C2(C)C(=O)[O-])O)C)C
4alpha-methyl-5alpha-cholest-8-en-3-one	1468350757	CC(CCCC(C1CCC2C1(C)CCC1=C2CCC2C1(C)CCC(=O)C2C)C)C
4alpha-hydroxymethyl-5alpha-cholest-8-en-3beta-ol	1468350781	OCC1C(O)CCC2(C1CCC1=C2CCC2(C1CCC2C(CCCC(C)C)C)C)C
4alpha-formyl-5alpha-cholest-8-en-3beta-ol	1468350789	O=CC1C(O)CCC2(C1CCC1=C2CCC2(C1CCC2C(CCCC(C)C)C)C)C
3beta-hydroxy-5alpha-cholest-8-ene-4alpha-carboxylate	1468350797	CC(CCCC(C1CCC2C1(C)CCC1=C2CCC2C1(C)CCC(C2C(=O)[O-])O)C)C
5alpha-cholest-8-en-3-one	1468350805	CC(CCCC(C1CCC2C1(C)CCC1=C2CCC2C1(C)CCC(=O)C2)C)C
lanost-8-ene-3beta,30-diol	1468350813	OCC12CCC(C2(C)CCC2=C1CCC1C2(C)CCC(C1(C)C)O)C(CCCC(C)C)C
3beta-hydroxylanost-8-en-32-al	1468350837	O=CC12CCC(C2(C)CCC2=C1CCC1C2(C)CCC(C1(C)C)O)C(CCCC(C)C)C
4beta-methylzymosterol-4-carbaldehyde	1468352269	O=CC1(C)C(O)CCC2(C1CCC1=C2CCC2(C1CCC2C(CCC=C(C)C)C)C)C
4alpha-hydroxymethyl-4beta-methylzymosterol	1468352285	OCC1(C)C(O)CCC2(C1CCC1=C2CCC2(C1CCC2C(CCC=C(C)C)C)C)C
(3S)-3-hydroxyoleoyl-CoA	1468355192	CCCCCCCCC=CCCCCCC(CC(=O)SCCNC(=O)CCNC(=O)C(C(COP(=O)(OP(=O)(OCC1OC(C(C1OP(=O)([O-])[O-])O)n1cnc2c1ncnc2N)[O-])[O-])(C)C)O)O
3-oxooleoyl-CoA	1468355256	CCCCCCCCC=CCCCCCC(=O)CC(=O)SCCNC(=O)CCNC(=O)C(C(COP(=O)(OP(=O)(OCC1OC(C(C1OP(=O)([O-])[O-])O)n1cnc2c1ncnc2N)[O-])[O-])(C)C)O
(7Z)-hexadecenoyl-CoA	1468355272	CCCCCCCCC=CCCCCCC(=O)SCCNC(=O)CCNC(=O)C(C(COP(=O)(OP(=O)(OCC1OC(C(C1OP(=O)([O-])[O-])O)n1cnc2c1ncnc2N)[O-])[O-])(C)C)O
(2E,5Z)-tetradecadienoyl-CoA	1468355296	CCCCCCCCC=CCC=CC(=O)SCCNC(=O)CCNC(=O)C(C(COP(=O)(OP(=O)(OCC1OC(C(C1OP(=O)([O-])[O-])O)n1cnc2c1ncnc2N)[O-])[O-])(C)C)O
(3S,5Z)-3-hydroxytetradec-5-enoyl-CoA	1468355328	CCCCCCCCC=CCC(CC(=O)SCCNC(=O)CCNC(=O)C(C(COP(=O)(OP(=O)(OCC1OC(C(C1OP(=O)([O-])[O-])O)n1cnc2c1ncnc2N)[O-])[O-])(C)C)O)O
(5Z)-3-oxotetradecenoyl-CoA	1468355344	CCCCCCCCC=CCC(=O)CC(=O)SCCNC(=O)CCNC(=O)C(C(COP(=O)(OP(=O)(OCC1OC(C(C1OP(=O)([O-])[O-])O)n1cnc2c1ncnc2N)[O-])[O-])(C)C)O
(2E,7Z)-hexadecadienoyl-CoA	1468355416	CCCCCCCCC=CCCCC=CC(=O)SCCNC(=O)CCNC(=O)C(C(COP(=O)(OP(=O)(OCC1OC(C(C1OP(=O)([O-])[O-])O)n1cnc2c1ncnc2N)[O-])[O-])(C)C)O
(3S,7Z)-3-hydroxyhexadecenoyl-CoA	1468355424	CCCCCCCCC=CCCCC(CC(=O)SCCNC(=O)CCNC(=O)C(C(COP(=O)(OP(=O)(OCC1OC(C(C1OP(=O)([O-])[O-])O)n1cnc2c1ncnc2N)[O-])[O-])(C)C)O)O
(7Z)-3-oxohexadecenoyl-CoA	1468355432	CCCCCCCCC=CCCCC(=O)CC(=O)SCCNC(=O)CCNC(=O)C(C(COP(=O)(OP(=O)(OCC1OC(C(C1OP(=O)([O-])[O-])O)n1cnc2c1ncnc2N)[O-])[O-])(C)C)O
3,5-dioxooctanedioic acid	1468357434	O=C(CC(=O)CC(=O)O)CCC(=O)O
3-hydroxysebacic acid	1468359590	OC(=O)CCCCCCC(CC(=O)O)O
17-hydroxypregnenolone 3-sulfate	1468359734	CC(=O)C1(O)CCC2C1(C)CCC1C2CC=C2C1(C)CCC(C2)OS(=O)(=O)O
propionylglycine	1468359782	CCC(=O)NCC(=O)O
tricosanoyl-CoA	1468360155	CCCCCCCCCCCCCCCCCCCCCCC(=O)SCCNC(=O)CCNC(=O)C(C(COP(=O)(OP(=O)(OCC1OC(C(C1OP(=O)([O-])[O-])O)n1cnc2c1ncnc2N)[O-])[O-])(C)C)O
(2E)-tricosenoyl-CoA	1468360163	CCCCCCCCCCCCCCCCCCCCC=CC(=O)SCCNC(=O)CCNC(=O)C(C(COP(=O)(OP(=O)(OCC1OC(C(C1OP(=O)([O-])[O-])O)n1cnc2c1ncnc2N)[O-])[O-])(C)C)O
N-(11Z-icosenoyl)-sphingosine-1-phosphocholine	1468362723	CCCCCCCCCCCCCC=CC(C(NC(=O)CCCCCCCCCC=CCCCCCCCC)COP(=O)(OCC[N+](C)(C)C)[O-])O
prostaglandin H1	1468364191	CCCCCC(C=CC1C2OOC(C1CCCCCCC(=O)[O-])C2)O
N-[(15Z)-tetracosenoyl]sphinganine-1-phosphocholine	1468366515	CCCCCCCCCCCCCCCC(C(NC(=O)CCCCCCCCCCCCCC=CCCCCCCCC)COP(=O)(OCC[N+](C)(C)C)[O-])O
Phe-Leu	1468366547	NC(C(=O)NC(C(=O)O)CC(C)C)Cc1ccccc1
Isocaproyl-CoA	1468370053	CC(CCC(=O)SCCNC(=O)CCNC(=O)C(C(COP(=O)(OP(=O)(OCC1OC(C(C1OP(=O)([O-])[O-])O)n1cnc2c1ncnc2N)[O-])[O-])(C)C)O)C
Cys-Cys	1468371011	SCC(C(=O)NC(C(=O)O)CS)N
O-pentadecanoylcarnitine	1468372249	CCCCCCCCCCCCCCC(=O)OC(C[N+](C)(C)C)CC(=O)[O-]
O-heptadecanoylcarnitine	1468372257	CCCCCCCCCCCCCCCCC(=O)OC(C[N+](C)(C)C)CC(=O)[O-]
1-pentadecanoyl-sn-glycero-3-phosphocholine	1468372471	CCCCCCCCCCCCCCC(=O)OCC(COP(=O)(OCC[N+](C)(C)C)[O-])O
1-nonadecanoyl-sn-glycero-3-phosphocholine	1468372932	CCCCCCCCCCCCCCCCCCC(=O)OCC(COP(=O)(OCC[N+](C)(C)C)[O-])O
ethylmalonate(2-)	1468378890	CCC(C(=O)[O-])C(=O)[O-]
prostaglandin G1	1468379616	CCCCCC(C=CC1C2OOC(C1CCCCCCC(=O)[O-])C2)OO
1-alpha-linolenoyl-sn-glycero-3-phosphocholine	1468380635	CCC=CCC=CCC=CCCCCCCCC(=O)OCC(COP(=O)(OCC[N+](C)(C)C)[O-])O
tyramine sulfate	1468380865	NCCc1ccc(cc1)OS(=O)(=O)O
glycodeoxycholic acid 3-sulfate	1468381643	O=C(NCC(=O)O)CCC(C1CCC2C1(C)C(O)CC1C2CCC2C1(C)CCC(C2)OS(=O)(=O)O)C
Folate	1468387639	OC(=O)CCC(C(=O)O)NC(=O)c1ccc(cc1)NCc1cnc2c(n1)c(=O)nc([nH]2)N
3-Hydroxyadipate	1468393430	OC(=O)CCC(CC(=O)O)O
KDN	1468395175	OCC(C(C(C(C(CC(=O)C(=O)O)O)O)O)O)O
3-Hydroxyglutarate	1468395262	OC(CC(=O)O)CC(=O)O
5b-Cholestane-3a,7a,12a,23S,25-pentol	1468396217	OC(CC(O)(C)C)CC(C1CCC2C1(C)C(O)CC1C2C(O)CC2C1(C)CCC(C2)O)C
5a-Cholestane-3a,7a,12a,25-tetrol	1468397019	OC1CCC2(C(C1)CC(C1C2CC(O)C2(C1CCC2C(CCCC(O)(C)C)C)C)O)C
5b-Cholestane-3a,7a,12a,24,25-pentol	1468397839	OC1CCC2(C(C1)CC(C1C2CC(O)C2(C1CCC2C(CCC(C(O)(C)C)O)C)C)O)C
Biliverdin	1468407417	C=CC1=C(C)C(=NC1=O)C=c1[nH]c(=Cc2[nH]c(c(c2CCC(=O)O)C)C=C2NC(=O)C(=C2C=C)C)c(c1C)CCC(=O)O
Keratan	1468409848	CC(=O)NC1C(OC(C(C1O)OC1OC(COS(=O)(=O)O)C(C(C1O)OC1OC(COS(=O)(=O)O)CC(C1NC(=O)C)O)O)COS(=O)(=O)O)OC1C(O)C(O)OC(C1O)COS(=O)(=O)O
Obtusifoliol	1468411053	OCC12CCC(C2(C)CCC2=C1CCC1C2(C)CCC(C1(C)C)O)C(CCC=C(C)C)C
4,4-Dimethyl-14a-formyl-5a-cholesta-8,24-dien-3b-ol	1468414478	O=CC12CCC(C2(C)CCC2=C1CCC1C2(C)CCC(C1(C)C)O)C(CCC=C(C)C)C
alpha-CEHC	1468416117	OC(=O)CCC1(C)CCc2c(O1)c(C)c(c(c2C)O)C
5-HTOL	1468417644	OCCc1c[nH]c2c1cc(O)cc2
5-Methoxytryptophol	1468419447	OCCc1c[nH]c2c1cc(OC)cc2
8-Dehydrocholesterol	1468422659	CC(CCCC(C1CCC2C1(C)CCC1=C2CC=C2C1(C)CCC(C2)O)C)C
Noradrenaline sulfate	1468423210	NCC(c1ccc(c(c1)O)OS(=O)(=O)O)O
CE(12:0)	1468426161	CCCCCCCCCCCC(=O)OC1CCC2(C(=CCC3C2CCC2(C3CCC2C(CCCC(C)C)C)C)C1)C
(E)-2-Methylglutaconate	1468426264	OC(=O)CC=C(C(=O)O)C
Axlon	1468426897	OCC1OC(C(C1OP(=O)(OC(CNC(=O)CCC1(C)C2=C(C)C3=NC(=CC4=NC(=C(C5=NC(C(C1CC(=O)N)[N-]2)(C)C(C)(CC(=O)N)C5CCC(=O)N)C)C(C4CCC(=O)N)(C)CC(=O)N)C(C3CCC(=O)N)(C)C)C)[O-])O)n1cnc2c1cc(C)c(c2)C.O.[Co+2]
3-Sulfocholyltaurine	1468429075	O=C(CCC(C1CCC2C1(C)C(O)CC1C2C(O)CC2C1(C)CCC(C2)OS(=O)(=O)O)C)NCCS(=O)(=O)O
3-Sulfochenodeoxycholate	1468429110	OC(=O)CCC(C1CCC2C1(C)CCC1C2C(O)CC2C1(C)CCC(C2)OS(=O)(=O)O)C
Deoxycholic acid 3-glucuronide	1468429129	OC(=O)CCC(C1CCC2C1(C)C(O)CC1C2CCC2C1(C)CCC(C2)OC1OC(C(=O)O)C(C(C1O)O)O)C
(R)-N-Methylsalsolinol	1468435444	CN1CCc2c(C1C)cc(c(c2)O)O
6,14-dimethyl-4,12-diazapentacyclo[8.6.1.1^{2,5}.0^{13,17}.0^{9,18}]octadeca-1(17),2,5,9(18),10,13-hexaene-7,8,15,16-tetrone	1468437629	Cc1c2[nH]cc3c2c(c(=O)c1=O)c1c[nH]c2c1c3c(=O)c(=O)c2C
Digalactosylceramide	1468441034	CCCCCCCCCCCCCCCCCCCCCCCCC(=O)NC(C(C=CCCCCCCCCCCCCC)O)COC1OC(CO)C(C(C1O)O)OC1OC(CO)C(C(C1O)O)O
Gb4	1468443811	CCCCCCCCCCCCCC=CC(C(NC(=O)CCCCCCCCCCCCCCCCCCCCCCCC)COC1OC(CO)C(C(C1O)O)OC1OC(CO)C(C(C1O)O)OC1OC(CO)C(C(C1O)OC1OC(CO)C(C(C1NC(=O)C)O)O)O)O
LTB5	1468445317	CCC=CCC=CCC(C=CC=CC=CC(CCCC(=O)O)O)O
CE(18:1)	1468445733	CCCCCCC=CCCCCCCCCCC(=O)OC1CCC2(C(=CCC3C2CCC2(C3CCC2C(CCCC(C)C)C)C)C1)C
CE(20:1)	1468445773	CCCCCCCCC=CCCCCCCCCCC(=O)OC1CCC2(C(=CCC3C2CCC2(C3CCC2C(CCCC(C)C)C)C)C1)C
IPu	1468451023	NCCCNCCCC(=O)O
Divalonic acid	1468451088	O=C1OCCC(C1)(C)O
Norsalsolinol	1468451342	Oc1cc2CNCCc2cc1O
Putreanine	1468451534	[NH3+]CCCCNCCC(=O)O
4-Nitroresorcinol	1468451769	Oc1ccc(c(c1)O)[N+](=O)[O-]
Stanolone glucuronate	1468451802	O=C1CCC2(C(C1)CCC1C2CCC2(C1CCC2OC1OC(C(=O)O)C(C(C1O)O)O)C)C
1-a,24R,25-Trihydroxyvitamin D2	1468452115	OC1CC(O)C(=C)C(=CC=C2CCCC3(C2CCC3C(C=CC(C(O)(C)C)(O)C)C)C)C1
Edaravone	1468452281	Cc1[nH]n(c(=O)c1)c1ccccc1
DHT-sulfate	1468452688	O=C1CCC2(C(C1)CCC1C2CCC2(C1CCC2OS(=O)(=O)O)C)C
Gamma-linolenyl carnitine	1468452954	CCCCCC=CCC=CCC=CCCCCC(=O)OC([N+](C)(C)C)CCC(=O)[O-]
a-Linolenyl carnitine	1468452971	CCC=CCC=CCC=CCCCCCCCC(=O)OC([N+](C)(C)C)CCC(=O)[O-]
Adrenyl carnitine	1468453007	CCCCCC=CCC=CCC=CCC=CCC=CCCC(=O)OC(C[N+](C)(C)C)CC(=O)[O-]
Hexacosanoyl carnitine	1468453243	CCCCCCCCCCCCCCCCCCCCCCCCCC(=O)OC(C[N+](C)(C)C)CC(=O)[O-]
Vaccenyl carnitine	1468453281	CCCCCCC=CCCCCCCCCCC(=O)OC([N+](C)(C)C)CCC(=O)[O-]
C20:4(N-6) carnitine	1468453601	CCCCCCCCCC=CCC=CCC=CCC=CCCCC(=O)OC(C[N+](C)(C)C)CC(=O)O
Stearidonyl carnitine	1468453726	CCC=CCC=CCCC=CCCC=CCCC(=O)OC(C[N+](C)(C)C)CC(=O)[O-]
Clupanodonyl carnitine	1468454102	CCC=CCCC=CCC=CCCC=CCCC=CCCC(=O)OC(C[N+](C)(C)C)CC(=O)[O-]
Retinoyl CoA	1468454238	O=C(NCCSC(=O)C=C(C=CC=C(C=CC1=C(C)CCCC1(C)C)C)C)CCNC(=O)C(C(COP(=O)(OP(=O)(OCC1OC(C(C1OP(=O)(O)O)O)n1cnc2c1ncnc2N)O)O)(C)C)O
Nervonyl carnitine	1468454261	CCC[N+](C)(C)C
Cervonyl carnitine	1468454275	CCC=CCC=CCC=CCC=CCC=CCC=CCCC(=O)OC(C[N+](C)(C)C)CC(=O)[O-]
Hcetc	1468454312	OC(=O)C(CSSCC(C(=O)O)O)N
Not Available	1468454715	OCC1OC(OC2C(CO)OC(C(C2O)NC(=O)C)O)C(C(C1O)OC1OC(CO)C(C(C1O)OC1OC(CO)C(C(C1O)O)O)O)O
Heptaglutamyl folic acid	1468454892	OC(=O)CCC(C(=O)N(C(C(C(C(=O)C(CCC(=O)O)N)(C(=O)C(CCC(=O)O)N)C(=O)O)(C(=O)C(CCC(=O)O)N)C(=O)C(CCC(=O)O)N)(C(=O)C(CCC(=O)O)N)C(=O)OC(=O)C(CCC(=O)O)N)C(=O)c1ccc(cc1)NCc1cnc2c(n1)c(=O)[nH]c(n2)N)N
Pteglu6	1468454941	O=C(OC(=O)C(C(C(=O)CCC(C(=O)O)N)(C(=O)CCC(C(=O)O)N)CC(=O)O)(N(C(=O)c1ccc(cc1)NCc1cnc2c(n1)c(=O)nc([nH]2)N)C(=O)CCC(C(=O)O)N)C(=O)CCC(C(=O)O)N)CCC(C(=O)O)N
22:4 Cholesterol ester	1468456368	CCCCCC=CCC=CCC=CCC=CCCCCCC(=O)OC1CCC2(C(=CCC3C2CCC2(C3CCC2C(CCCC(C)C)C)C)C1)C
CE(20:2(6Z,9Z))	1468456446	CCCCCC=CCC=CCCCCCCCCCC(=O)OC1CCC2(C(=CCC3C2CCC2(C3CCC2C(CCCC(C)C)C)C)C1)C
CE(22:2(13Z,16Z))	1468456485	CCCCCC=CCC=CCCCCCCCCCCCC(=O)OC1CCC2(C(=CCC3C2CCC2(C3CCC2C(CCCC(C)C)C)C)C1)C
CE(19:0)	1468456507	CCCCCCCCCCCCCCCCCCC(=O)OC1CCC2(C(=CCC3C2CCC2(C3CCC2C(CCCC(C)C)C)C)C1)C
CE(20:0)	1468456526	CCCCCCCCCCCCCCCCCCCC(=O)OC1CCC2(C(=CCC3C2CCC2(C3CCC2C(CCCC(C)C)C)C)C1)C
1,4-b-D-Mannan	1468457060	OCC1OC(OC2C(CO)OC(C(C2O)O)OC2C(CO)OC(C(C2O)O)OC2C(CO)OC(C(C2O)O)OC2C(CO)OC(C(C2O)O)O)C(C(C1OC1OC(CO)C(C(C1O)O)OC1OC(CO)C(C(C1O)O)OC1OC(CO)C(C(C1O)O)OC1OC(CO)C(C(C1O)O)OC1OC(CO)C(C(C1O)O)O)O)O
14,15-DiHETE	1468547204	CCC=CCC(C(CC=CCC=CCC=CCCCC(=O)O)O)O
15-HEPE	1468547292	CCC=CC(CC=CC=CCC=CCC=CCCCC(=O)O)O
Dopamine glucuronide	1468550042	NCCc1ccc(c(c1)O)OC1OC(C(=O)O)C(C(C1O)O)O
Ibuprofen acyl glucuronide	1468550322	CC(Cc1ccc(cc1)C(C(=O)OC1OC(C(=O)O)C(C(C1O)O)O)C)C
CE(14:1)	1468550799	CCCCC=CCCCCCCCC(=O)OC1CCC2(C(=CCC3C2CCC2(C3CCC2C(CCCC(C)C)C)C)C1)C
CE(18:3)	1468550863	CCCCCC=CCC=CCC=CCCCCC(=O)OC1CCC2(C(=CCC3C2CCC2(C3CCC2C(CCCC(C)C)C)C)C1)C
CE(22:1)	1468551003	CCCCCCCCC=CCCCCCCCCCCCC(=O)OC1CCC2(C(=CCC3C2CCC2(C3CCC2C(CCCC(C)C)C)C)C1)C
LPC(18:3)	1468551428	CCCCCC=CCC=CCC=CCCCCC(=O)OCC(COP(=O)(OCC[N+](C)(C)C)[O-])O
LPC(20:1)	1468551546	CCCCCCCCC=CCCCCCCCCCC(=O)OCC(COP(=O)(OCC[N+](C)(C)C)[O-])O
LPC(20:5)	1468551739	CCC=CCC=CCC=CCC=CCC=CCCCC(=O)OCC(COP(=O)(OCC[N+](C)(C)C)[O-])O
2-Hydroxy-3-methoxyestrone	1468562084	COc1cc2CCC3C(c2cc1O)CCC1(C3CCC1=O)C
LPE(15:0)	1468568757	CCCCCCCCCCCCCCC(=O)OC(COP(=O)(OCCN)O)CO
LysoPE(20:3(11Z,14Z,17Z)/0:0)	1468570000	CCC=CCC=CCC=CCCCCCCCCCC(=O)OCC(COP(=O)(OCCN)O)O
LPE(20:3)	1468570046	CCCCCC=CCC=CCC=CCCCCCCC(=O)OCC(COP(=O)(OCCN)O)O
LPE(22:4)	1468570265	CCCCCC=CCC=CCC=CCC=CCCCCCC(=O)OCC(COP(=O)(OCCN)O)O
N-Acetyl-D-glucosaminylphosphatidylinositol	1468573394	OCC1OC(OC2C(OP(=O)(OCC(OC(=O)C)COC(=O)C)O)C(O)C(C(C2O)O)O)C(C(C1O)O)NC(=O)C
N-Acetylvanilalanine	1468574244	COc1cc(ccc1O)CC(C(=O)O)NC(=O)C
CMP-Neu5Gc	1468580882	OCC(=O)NC1C(O)CC(OC1C(C(COP(=O)(OCC1OC(C(C1O)O)n1ccc(nc1=O)N)O)O)O)(O)C(=O)O
(2E,6R)-2,6,10-trimethylundecanoyl-CoA	1468586322	CC(CCC=C(C(=O)SCCNC(=O)CCNC(=O)C(C(COP(=O)(OP(=O)(OCC1OC(C(C1OP(=O)([O-])[O-])O)n1cnc2c1ncnc2N)[O-])[O-])(C)C)O)C)CCCC(C)C
(2S,6R,10R)-Trimethyl-hendecanoyl-CoA	1468586344	CC(CCCC(C)C)CCCC(C(=O)SCCNC(=O)CCNC(=O)C(C(COP(=O)(OP(=O)(OCC1OC(C(C1OP(=O)([O-])[O-])O)n1cnc2c1ncnc2N)[O-])[O-])(C)C)O)C
3EZZTT-CoA	1468586366	CCCCCC=CCC=CC=CCC(=O)SCCNC(=O)CCNC(=O)C(C(COP(=O)(OP(=O)(OCC1OC(C(C1OP(=O)([O-])[O-])O)n1cnc2c1ncnc2N)[O-])[O-])(C)C)O
3(S)-Hydroxy-7Z,10Z-hexadecadienoyl-CoA	1468586386	CCCCCC=CCC=CCCCC(CC(=O)SCCNC(=O)CCNC(=O)C(C(COP(=O)(OP(=O)(OCC1OC(C(C1OP(=O)([O-])[O-])O)n1cnc2c1ncnc2N)[O-])[O-])(C)C)O)O
3STDe-CoA	1468586409	CCCCCC=CCCCCC(CC(=O)SCCNC(=O)CCNC(=O)C(C(COP(=O)(OP(=O)(OCC1OC(C(C1OP(=O)([O-])[O-])O)n1cnc2c1ncnc2N)[O-])[O-])(C)C)O)O
(3S)-3-hydroxydodec-6Z-enoyl-CoA	1468586442	CCCCCC=CCCC(CC(=O)SCCNC(=O)CCNC(=O)C(C(COP(=O)(OP(=O)(OCC1OC(C(C1OP(=O)([O-])[O-])O)n1cnc2c1ncnc2N)[O-])[O-])(C)C)O)O
(3S)-3-Hydroxylinoleoyl-CoA	1468586463	CCCCCC=CCC=CCCCCCC(CC(=O)SCCNC(=O)CCNC(=O)C(C(COP(=O)(OP(=O)(OCC1OC(C(C1OP(=O)([O-])[O-])O)n1cnc2c1ncnc2N)[O-])[O-])(C)C)O)O
(4R,8R,12R)-Trimethyl-2E-tridecenoyl-CoA	1468586504	CC(C=CC(=O)SCCNC(=O)CCNC(=O)C(C(COP(=O)(OP(=O)(OCC1OC(C(C1OP(=O)([O-])[O-])O)n1cnc2c1ncnc2N)[O-])[O-])(C)C)O)CCCC(CCCC(C)C)C
(R)-1,2-dimethyl-5,6-dihydroxy-tetrahydroisoquinoline	1468586555	CN1CCc2c(C1C)ccc(c2O)O
3(S)-Hydroxypalmitoleoyl-CoA	1468586597	CCCCCCC=CCCCCCC(CC(=O)SCCNC(=O)CCNC(=O)C(C(COP(=O)(OP(=O)(OCC1OC(C(C1OP(=O)([O-])[O-])O)n1cnc2c1ncnc2N)[O-])[O-])(C)C)O)O
THBC	1468586615	N1CCc2c(C1)[nH]c1c2cccc1
DSAL	1468586646	CC1=NCCc2c1cc(O)c(c2)O
QI	1468586661	NC(C(=O)O)CC1=CC(=O)C2=NC(CSC2=C1)C(=O)O
PHPTCC	1468586674	OCC(C(C(C(C1NC(Cc2c1[nH]c1c2cccc1)C(=O)[O-])O)O)O)O
10,11-dihydro-12-oxo-LTB4	1468586736	CCCCCC=CCC(=O)CCC=CC=CC(CCCC(=O)O)O
10,11-dihydro-20-dihydroxy-LTB4	1468586777	OC(CC=CCCCCC(O)O)CCC=CC=CC(CCCC(=O)O)O
10,11-dihydro-20-trihydroxy-leukotriene B4	1468586794	OC(CC=CCCCCC(O)(O)O)CCC=CC=CC(CCCC(=O)O)O
DHLTB4	1468586811	CCCCCC=CCC(CCC=CC=CC(CCCC(=O)O)O)O
12-oxo-10,11-dihydro-20-COOH-LTB4	1468586976	O=C(CC=CCCCCC(=O)O)CCC=CC=CC(CCCC(=O)O)O
12-Oxo-20-COOH-LTB(,4)	1468586993	OC(=O)CCCCC=CCC(=O)C=CC=CC=CC(CCCC(=O)O)O
Ox20dHLTB4	1468587012	OC(CCCC(=O)O)C=CC=CC=CC(=O)CC=CCCCCC(O)O
Ox20HLTB4	1468587033	OCCCCCC=CCC(=O)C=CC=CC=CC(CCCC(=O)O)O
DOxLTB4	1468587053	OC(CCCC(=O)O)C=CC=CC=CC(=O)CC=CCCCCC(O)(O)O
13E-Tetranor-16-oxo-16-CoA-LTE4	1468587246	O=C(CCNC(=O)C(C(COP(=O)(OP(=O)(OCC1OC(C(C1OP(=O)([O-])[O-])O)n1cnc2c1ncnc2N)[O-])[O-])(C)C)O)NCCSC(=O)CC=CC=CC=CC=CC(C(CCCC(=O)O)O)SCC(C(=O)O)N
14OHE4NP	1468587262	CCC=CCC=CCC(C=CC1C(O)CC(=O)C1CC=CCCC(=O)O)O
[truncated: 202 more rows]

## Sheet: S1.3
E.C. numbers
1.1.1
1.1.2
1.1.3
1.1.4
1.1.5
1.1.99
1.10.2
1.10.99
1.11.1
1.11.2
1.13.11
1.13.99
1.14.11
1.14.13
1.14.14
1.14.15
1.14.16
1.14.17
1.14.18
1.14.19
1.14.21
1.14.99
1.15.1
1.16.1
1.16.3
1.17.1
1.17.3
1.17.4
1.17.99
1.18.1
1.2.1
1.2.3
1.2.4
1.2.7
1.3.1
1.3.3
1.3.5
1.3.8
1.3.99
1.4.1
1.4.11
1.4.3
1.4.4
1.5.1
1.5.3
1.5.5
1.5.8
1.5.99
1.6.1
1.6.2
1.6.5
1.6.99
1.7.1
1.7.14
1.7.3
1.8.1
1.8.3
1.8.4
1.9.3
1.97.1
2.1.1
2.1.2
2.1.3
2.1.4
2.2.1
2.3.1
2.3.2
2.3.3
2.4.1
2.4.2
2.4.99
2.5.1
2.6.1
2.6.19
2.7.1
2.7.10
2.7.11
2.7.12
2.7.2
2.7.3
2.7.4
2.7.6
2.7.7
2.7.8
2.7.9
2.8.1
2.8.2
2.8.3
3.1.1
3.1.11
3.1.2
3.1.3
3.1.4
3.1.6
3.10.1
3.2.1
3.2.2
3.3.1
3.3.2
3.4.11
3.4.13
3.4.14
3.4.15
3.4.17
3.4.19
3.4.2
3.4.21
3.4.22
3.4.24
3.5.1
3.5.2
3.5.3
3.5.4
3.5.99
3.6.1
3.6.3
3.6.5
3.7.1
4.1.1
4.1.2
4.1.3
4.1.99
4.2.1
4.2.3
4.3.1
4.3.2
4.4.1
4.6.1
4.99.1
5.1.1
5.1.3
5.1.99
5.2.1
5.3.1
5.3.2
5.3.3
5.3.4
5.3.99
5.4.2
5.4.4
5.4.99
5.5.1
6.1.1
6.2.1
6.3.2
6.3.3
6.3.4
6.3.5
6.4.1
6.5.1
