# Supplementary material for: NICEdrug.ch, a workflow for rational drug design and systems-level analysis of drug metabolism
Source: eLife. 2021 Aug 3;10:e65543. doi: 10.7554/eLife.65543 (PMC8331181; doi:10.7554/eLife.65543)
Supplement: Supplementary file 2. — (A) Comparison of available computational tools to predict drug metabolism. (B) Evaluation of NICEdrug.ch potential to predict the druggability (through competitive inhibition) of an enzyme by a small molecule based on available biochemical assays and high-throughput compound screenings results. (C) Detailed comparison of NICEdrug.ch druggability results for tolcapone (a neuropsychiatric agent), pravastatin (a cardiovascular agent), oxfenicine (a vasodilator), dopamine (a cardiovascular agent) and acarbose (an antidiabetic agent) against available biochemical assays. (D) Result of large-scale quantitative comparison of drug-metabolite, toxicity and drug-enzyme predictions using NICEdrug and other drug discovery tools. (E) Literature derived examples demonstrating NICEdrug performance in predicting pathways of drug metabolism. [file elife-65543-supp2.xlsx]

## Sheet: Summary
Tab in Supplementary_File_2	Description of each tab/section in Supplementary_File_2, related to Figure 1, 2, 3, 4, 5, 6 and 8
S2.1	Druggability analysis of all 90k drug-enzyme pairs with bioassay results using NICEdrug.ch
S2.2	NICEdrug.ch druggability results for tolcapone a neuropsychiatric agent (accuracy=0.83)
S2.3	NICEdrug.ch druggability results for pravastatin a cardiovascular agent (accuracy=1)
S2.4	NICEdrug.ch druggability results for oxfenicine a vasodilator (accuracy=1)
S2.5	NICEdrug.ch druggability results for dopamine a cardiovascular agent (accuracy=0.95)
S2.6	NICEdrug.ch druggability results for acarbose a antidiabetic agent (accuracy=0.95)
S2.7	Comparative analysis of NICEdrug.ch against other metabolic prediction tools
S2.8	Evaluation of NICEdrug.ch reactivity report to predict drugs and metabolites sharing reactivity
S2.9	Evaludation of NICEdrug.ch toxicity report
S2.10	Evalutaion of NICEdrug.ch druggability report
S2.11	Evaluation of the NBI method the predict druggability
S2.12	All pairs of experimentally approved drug-metabolites discussed in a review paper by (Kirchmair et al., 2015) along with NICEdrug.ch predictions

## Sheet: S2.1
Pubchem CID	Drug NICEdrug.ch ID	Drug name	Target enzyme EC number (4th level)	NICEdrug.ch score (similaity to native substrates of target enzyme)	Bioassay result
126	1467873025	4-Hydroxybenzaldehyde	1.2.1.24	1	Active
311	1467867671	Citrate	4.2.1.10	1	Active
311	1467867671	Citrate	4.2.1.10	1	Active
323	3485	Coumarin	1.14.14.1	1	Active
323	3485	Coumarin	1.14.14.-	1	Active
402	1467869221	Hydrogen sulfide	4.2.1.1	1	Active
402	1467869221	Hydrogen sulfide	4.2.1.1	1	Active
402	1467869221	Hydrogen sulfide	4.2.1.1	1	Active
402	1467869221	Hydrogen sulfide	4.2.1.1	1	Active
402	1467869221	Hydrogen sulfide	4.2.1.1	1	Active
402	1467869221	Hydrogen sulfide	4.2.1.1	1	Active
402	1467869221	Hydrogen sulfide	4.2.1.1	1	Active
402	1467869221	Hydrogen sulfide	4.2.1.1	1	Active
402	1467869221	Hydrogen sulfide	4.2.1.1	1	Active
402	1467869221	Hydrogen sulfide	4.2.1.1	1	Active
402	1467869221	Hydrogen sulfide	4.2.1.1	1	Active
402	1467869221	Hydrogen sulfide	4.2.1.1	1	Active
402	1467869221	Hydrogen sulfide	4.2.1.1	1	Active
402	1467869221	Hydrogen sulfide	4.2.1.1	1	Active
402	1467869221	Hydrogen sulfide	4.2.1.1	1	Active
402	1467869221	Hydrogen sulfide	4.2.1.1	1	Active
402	1467869221	Hydrogen sulfide	4.2.1.1	1	Active
402	1467869221	Hydrogen sulfide	4.2.1.1	1	Active
402	1467869221	Hydrogen sulfide	4.2.1.1	1	Active
402	1467869221	Hydrogen sulfide	4.2.1.1	1	Active
402	1467869221	Hydrogen sulfide	4.2.1.1	1	Active
402	1467869221	Hydrogen sulfide	4.2.1.1	1	Active
402	1467869221	Hydrogen sulfide	4.2.1.1	1	Active
402	1467869221	Hydrogen sulfide	4.2.1.1	1	Active
402	1467869221	Hydrogen sulfide	4.2.1.1	1	Active
402	1467869221	Hydrogen sulfide	4.2.1.1	1	Active
402	1467869221	Hydrogen sulfide	4.2.1.1	1	Active
402	1467869221	Hydrogen sulfide	4.2.1.1	1	Active
402	1467869221	Hydrogen sulfide	4.2.1.1	1	Active
402	1467869221	Hydrogen sulfide	4.2.1.1	1	Active
402	1467869221	Hydrogen sulfide	4.2.1.1	1	Active
402	1467869221	Hydrogen sulfide	4.2.1.1	1	Active
402	1467869221	Hydrogen sulfide	4.2.1.1	1	Active
402	1467869221	Hydrogen sulfide	4.2.1.1	1	Active
402	1467869221	Hydrogen sulfide	4.2.1.1	1	Active
402	1467869221	Hydrogen sulfide	4.2.1.1	1	Active
402	1467869221	Hydrogen sulfide	4.2.1.1	1	Active
402	1467869221	Hydrogen sulfide	4.2.1.1	1	Active
402	1467869221	Hydrogen sulfide	4.2.1.1	1	Active
402	1467869221	Hydrogen sulfide	4.2.1.1	1	Active
402	1467869221	Hydrogen sulfide	4.2.1.1	1	Active
402	1467869221	Hydrogen sulfide	4.2.1.1	1	Active
402	1467869221	Hydrogen sulfide	4.2.1.1	1	Active
402	1467869221	Hydrogen sulfide	4.2.1.1	1	Active
768	1467879774	Hydrogen cyanide	4.2.1.1	1	Active
768	1467879774	Hydrogen cyanide	4.2.1.1	1	Active
768	1467879774	Hydrogen cyanide	4.2.1.1	1	Active
768	1467879774	Hydrogen cyanide	4.2.1.1	1	Active
768	1467879774	Hydrogen cyanide	4.2.1.1	1	Active
768	1467879774	Hydrogen cyanide	4.2.1.1	1	Active
768	1467879774	Hydrogen cyanide	4.2.1.1	1	Active
768	1467879774	Hydrogen cyanide	4.2.1.1	1	Active
768	1467879774	Hydrogen cyanide	4.2.1.1	1	Active
768	1467879774	Hydrogen cyanide	4.2.1.1	1	Active
768	1467879774	Hydrogen cyanide	4.2.1.1	1	Active
768	1467879774	Hydrogen cyanide	4.2.1.1	1	Active
768	1467879774	Hydrogen cyanide	4.2.1.1	1	Active
768	1467879774	Hydrogen cyanide	4.2.1.1	1	Active
768	1467879774	Hydrogen cyanide	4.2.1.1	1	Active
768	1467879774	Hydrogen cyanide	4.2.1.1	1	Active
768	1467879774	Hydrogen cyanide	4.2.1.1	1	Active
768	1467879774	Hydrogen cyanide	4.2.1.1	1	Active
768	1467879774	Hydrogen cyanide	4.2.1.1	1	Active
1045	1467867342	Putrescine	4.1.1.50	1	Active
1051	1467865752	Pyridoxal phosphate	3.1.3.48	1	Active
1051	1467865752	Pyridoxal phosphate	3.1.3.48	1	Active
1054	1467869570	Pyridoxine	2.7.1.35	1	Active
1150	1467870508	Tryptamine	1.14.13.-	1	Active
1150	1467870508	Tryptamine	1.14.13.-	1	Active
1183	1467874207	4-Hydroxy-3-methoxy-benzaldehyde	1.2.1.24	1	Active
2355	1467881501	Bergapten	2.1.1.356	1	Active
2907	1467930227	Cyclophosphamide	1.14.14.-	1	Active
3121	1467924421	Valproic acid	1.14.14.-	1	Active
4788	1467874409	Phloretin	3.2.1.20	1	Active
5757	1467876271	Estradiol-17beta	1.1.1.62	1	Active
5757	1467876271	Estradiol-17beta	1.14.13.-	1	Active
5757	1467876271	Estradiol-17beta	1.14.14.-	1	Active
5789	1467868402	Thymidine	2.7.1.21	1	Active
5789	1467868402	Thymidine	2.7.1.21	1	Active
5789	1467868402	Thymidine	2.7.1.21	1	Active
5789	1467868402	Thymidine	2.7.1.21	1	Active
5789	1467868402	Thymidine	2.7.1.21	1	Active
5789	1467868402	Thymidine	2.7.1.21	1	Active
5789	1467868402	Thymidine	2.7.1.21	1	Active
5789	1467868402	Thymidine	2.7.1.21	1	Active
5789	1467868402	Thymidine	2.7.1.21	1	Active
5789	1467868402	Thymidine	2.7.1.21	1	Active
5789	1467868402	Thymidine	2.7.1.21	1	Active
5789	1467868402	Thymidine	2.7.1.21	1	Active
5789	1467868402	Thymidine	2.7.1.21	1	Active
5789	1467868402	Thymidine	2.7.1.21	1	Active
5789	1467868402	Thymidine	2.7.1.21	1	Active
5789	1467868402	Thymidine	2.7.1.21	1	Active
5789	1467868402	Thymidine	2.7.1.21	1	Active
5789	1467868402	Thymidine	2.7.1.21	1	Active
5789	1467868402	Thymidine	2.7.1.21	1	Active
5789	1467868402	Thymidine	2.7.1.21	1	Active
5789	1467868402	Thymidine	2.7.1.21	1	Active
5789	1467868402	Thymidine	2.7.1.21	1	Active
5789	1467868402	Thymidine	2.7.1.21	1	Active
5870	1467871230	Estrone	1.1.1.62	1	Active
5870	1467871230	Estrone	1.1.1.62	1	Active
5870	1467871230	Estrone	1.1.1.62	1	Active
5870	1467871230	Estrone	1.1.1.62	1	Active
5870	1467871230	Estrone	1.1.1.62	1	Active
5870	1467871230	Estrone	1.1.1.62	1	Active
5870	1467871230	Estrone	1.14.14.14	1	Active
5870	1467871230	Estrone	1.1.1.62	1	Active
5870	1467871230	Estrone	1.1.1.62	1	Active
5879	1467871919	Androsterone	1.1.1.64	1	Active
5879	1467871919	Androsterone	1.1.1.64	1	Active
5879	1467871919	Androsterone	1.1.1.64	1	Active
5879	1467871919	Androsterone	1.1.1.64	1	Active
5879	1467871919	Androsterone	1.1.1.64	1	Active
5881	1467878934	Dehydroepiandrosterone	1.1.1.49	1	Active
5881	1467878934	Dehydroepiandrosterone	1.1.1.49	1	Active
5881	1467878934	Dehydroepiandrosterone	1.1.1.49	1	Active
5881	1467878934	Dehydroepiandrosterone	1.1.1.49	1	Active
5881	1467878934	Dehydroepiandrosterone	1.1.1.49	1	Active
5881	1467878934	Dehydroepiandrosterone	1.1.1.49	1	Active
5881	1467878934	Dehydroepiandrosterone	1.1.1.49	1	Active
5881	1467878934	Dehydroepiandrosterone	1.1.1.49	1	Active
5881	1467878934	Dehydroepiandrosterone	1.1.1.49	1	Active
5881	1467878934	Dehydroepiandrosterone	1.1.1.49	1	Active
5881	1467878934	Dehydroepiandrosterone	1.1.1.49	1	Active
5881	1467878934	Dehydroepiandrosterone	1.1.1.49	1	Active
5881	1467878934	Dehydroepiandrosterone	1.1.1.49	1	Active
5881	1467878934	Dehydroepiandrosterone	1.1.1.49	1	Active
5881	1467878934	Dehydroepiandrosterone	1.1.1.49	1	Active
5881	1467878934	Dehydroepiandrosterone	1.1.1.49	1	Active
5881	1467878934	Dehydroepiandrosterone	1.1.1.49	1	Active
5881	1467878934	Dehydroepiandrosterone	1.1.1.49	1	Active
5881	1467878934	Dehydroepiandrosterone	1.1.1.49	1	Active
5881	1467878934	Dehydroepiandrosterone	1.1.1.49	1	Active
5881	1467878934	Dehydroepiandrosterone	1.1.1.49	1	Active
5881	1467878934	Dehydroepiandrosterone	1.1.1.49	1	Active
5881	1467878934	Dehydroepiandrosterone	1.1.1.49	1	Active
5881	1467878934	Dehydroepiandrosterone	1.1.1.49	1	Active
5942	1467895694	Norspermidine	2.5.1.46	1	Active
5942	1467895694	Norspermidine	2.5.1.46	1	Active
5994	1467870654	Progesterone	1.3.1.22	1	Active
5994	1467870654	Progesterone	1.3.1.22	1	Active
5994	1467870654	Progesterone	1.3.1.22	1	Active
5994	1467870654	Progesterone	1.3.1.22	1	Active
5994	1467870654	Progesterone	1.14.14.-	1	Active
5994	1467870654	Progesterone	1.3.1.72	1	Active
5997	1467868045	Cholesterol	1.14.15.6	1	Active
5997	1467868045	Cholesterol	1.14.15.29	1	Active
5997	1467868045	Cholesterol	1.14.15.29	1	Active
6013	1467872060	Testosterone	1.14.14.14	1	Active
6013	1467872060	Testosterone	1.14.14.14	1	Active
6013	1467872060	Testosterone	1.14.14.14	1	Active
6013	1467872060	Testosterone	1.14.14.14	1	Active
6013	1467872060	Testosterone	1.3.1.22	1	Active
6013	1467872060	Testosterone	1.3.1.22	1	Active
6013	1467872060	Testosterone	1.14.14.-	1	Active
6029	1467869376	Uridine	3.5.4.5	1	Active
6128	1467869193	Androstenedione	1.14.14.14	1	Active
6128	1467869193	Androstenedione	1.14.14.14	1	Active
6128	1467869193	Androstenedione	1.14.14.14	1	Active
6128	1467869193	Androstenedione	1.14.14.14	1	Active
6128	1467869193	Androstenedione	1.14.14.14	1	Active
6128	1467869193	Androstenedione	1.14.14.14	1	Active
6128	1467869193	Androstenedione	1.1.1.64	1	Active
6128	1467869193	Androstenedione	1.14.14.14	1	Active
6128	1467869193	Androstenedione	1.1.1.64	1	Active
6128	1467869193	Androstenedione	1.1.1.64	1	Active
6128	1467869193	Androstenedione	1.1.1.64	1	Active
6128	1467869193	Androstenedione	1.1.1.64	1	Active
6128	1467869193	Androstenedione	1.1.1.64	1	Active
6176	1467866360	CTP	2.7.7.33	1	Active
6267	1467867581	L-Asparagine	4.2.1.1	1	Active
6305	1467866565	L-Tryptophan	4.2.1.1	1	Active
6305	1467866565	L-Tryptophan	4.2.1.1	1	Active
6305	1467866565	L-Tryptophan	4.2.1.1	1	Active
6305	1467866565	L-Tryptophan	4.2.1.1	1	Active
6305	1467866565	L-Tryptophan	4.2.1.1	1	Active
6305	1467866565	L-Tryptophan	4.2.1.1	1	Active
6305	1467866565	L-Tryptophan	4.2.1.1	1	Active
6305	1467866565	L-Tryptophan	4.2.1.1	1	Active
6305	1467866565	L-Tryptophan	4.2.1.1	1	Active
6305	1467866565	L-Tryptophan	4.2.1.1	1	Active
6305	1467866565	L-Tryptophan	4.2.1.1	1	Active
6305	1467866565	L-Tryptophan	4.2.1.1	1	Active
6305	1467866565	L-Tryptophan	4.2.1.1	1	Active
6305	1467866565	L-Tryptophan	4.2.1.1	1	Active
6305	1467866565	L-Tryptophan	4.2.1.1	1	Active
6305	1467866565	L-Tryptophan	4.2.1.1	1	Active
6305	1467866565	L-Tryptophan	4.2.1.1	1	Active
6305	1467866565	L-Tryptophan	4.2.1.1	1	Active
6305	1467866565	L-Tryptophan	4.2.1.1	1	Active
6305	1467866565	L-Tryptophan	4.2.1.1	1	Active
6305	1467866565	L-Tryptophan	4.2.1.1	1	Active
6305	1467866565	L-Tryptophan	4.2.1.1	1	Active
6305	1467866565	L-Tryptophan	4.2.1.1	1	Active
6305	1467866565	L-Tryptophan	4.2.1.1	1	Active
6305	1467866565	L-Tryptophan	4.2.1.1	1	Active
6305	1467866565	L-Tryptophan	4.2.1.1	1	Active
6305	1467866565	L-Tryptophan	4.2.1.1	1	Active
6305	1467866565	L-Tryptophan	4.2.1.1	1	Active
6305	1467866565	L-Tryptophan	4.2.1.1	1	Active
6305	1467866565	L-Tryptophan	4.2.1.1	1	Active
6305	1467866565	L-Tryptophan	4.2.1.1	1	Active
6305	1467866565	L-Tryptophan	4.2.1.1	1	Active
6305	1467866565	L-Tryptophan	4.2.1.1	1	Active
6305	1467866565	L-Tryptophan	4.2.1.1	1	Active
6305	1467866565	L-Tryptophan	4.2.1.1	1	Active
6305	1467866565	L-Tryptophan	4.2.1.1	1	Active
6305	1467866565	L-Tryptophan	4.2.1.1	1	Active
6305	1467866565	L-Tryptophan	4.2.1.1	1	Active
6305	1467866565	L-Tryptophan	4.2.1.1	1	Active
6305	1467866565	L-Tryptophan	4.2.1.1	1	Active
6305	1467866565	L-Tryptophan	4.2.1.1	1	Active
6305	1467866565	L-Tryptophan	4.2.1.1	1	Active
6305	1467866565	L-Tryptophan	4.2.1.1	1	Active
6305	1467866565	L-Tryptophan	4.2.1.1	1	Active
6305	1467866565	L-Tryptophan	4.2.1.1	1	Active
6305	1467866565	L-Tryptophan	4.2.1.1	1	Active
6305	1467866565	L-Tryptophan	4.2.1.1	1	Active
6305	1467866565	L-Tryptophan	4.2.1.1	1	Active
6305	1467866565	L-Tryptophan	4.2.1.1	1	Active
6613	1467875442	Pantothenate	2.7.1.33	1	Active
6613	1467875442	Pantothenate	2.7.1.33	1	Active
7002	1467987376	1-Methylnaphthalene	1.14.13.-	1	Active
7002	1467987376	1-Methylnaphthalene	1.14.13.-	1	Active
7055	1467987545	2-Methylnaphthalene	1.14.13.-	1	Active
7055	1467987545	2-Methylnaphthalene	1.14.13.-	1	Active
8371	1468032732	Chloranil	1.1.1.141	1	Active
8371	1468032732	Chloranil	1.1.1.141	1	Active
8549	1467918693	Quinine	1.14.14.-	1	Active
8549	1467918693	Quinine	1.14.14.-	1	Active
8549	1467918693	Quinine	1.14.14.-	1	Active
9700	1467870132	dTMP	2.7.4.9	1	Active
9700	1467870132	dTMP	2.7.4.9	1	Active
9700	1467870132	dTMP	2.7.4.9	1	Active
9700	1467870132	dTMP	2.7.4.9	1	Active
9700	1467870132	dTMP	2.7.4.9	1	Active
9700	1467870132	dTMP	2.7.4.9	1	Active
9700	1467870132	dTMP	2.7.4.9	1	Active
9700	1467870132	dTMP	2.7.4.9	1	Active
9700	1467870132	dTMP	2.7.4.9	1	Active
9700	1467870132	dTMP	2.7.4.9	1	Active
9700	1467870132	dTMP	2.7.4.9	1	Active
9700	1467870132	dTMP	2.7.4.9	1	Active
9700	1467870132	dTMP	2.7.4.9	1	Active
9700	1467870132	dTMP	2.7.4.9	1	Active
9700	1467870132	dTMP	2.7.4.9	1	Active
9700	1467870132	dTMP	2.7.4.9	1	Active
9700	1467870132	dTMP	2.7.4.9	1	Active
9700	1467870132	dTMP	2.7.4.9	1	Active
9700	1467870132	dTMP	2.7.4.9	1	Active
9700	1467870132	dTMP	2.7.4.9	1	Active
9700	1467870132	dTMP	2.7.4.9	1	Active
9700	1467870132	dTMP	2.7.4.9	1	Active
9700	1467870132	dTMP	2.7.4.9	1	Active
9700	1467870132	dTMP	2.7.4.9	1	Active
9700	1467870132	dTMP	2.7.4.9	1	Active
9700	1467870132	dTMP	2.7.4.9	1	Active
9700	1467870132	dTMP	2.7.4.9	1	Active
9700	1467870132	dTMP	2.7.4.9	1	Active
9700	1467870132	dTMP	2.7.1.21	1	Active
9700	1467870132	dTMP	2.7.4.9	1	Active
9700	1467870132	dTMP	2.7.4.9	1	Active
9700	1467870132	dTMP	2.7.4.9	1	Active
9700	1467870132	dTMP	2.7.4.9	1	Active
9700	1467870132	dTMP	2.7.4.9	1	Active
9700	1467870132	dTMP	2.7.4.9	1	Active
9700	1467870132	dTMP	2.7.4.9	1	Active
9700	1467870132	dTMP	2.7.4.9	1	Active
9700	1467870132	dTMP	2.7.4.9	1	Active
9700	1467870132	dTMP	2.7.4.9	1	Active
9700	1467870132	dTMP	2.7.4.9	1	Active
9700	1467870132	dTMP	2.7.4.9	1	Active
10114	1467887698	Glycyrrhetinate	1.1.1.-	1	Active
10114	1467887698	Glycyrrhetinate	1.1.1.-	1	Active
10114	1467887698	Glycyrrhetinate	1.1.1.-	1	Active
10114	1467887698	Glycyrrhetinate	1.1.1.146	1	Active
10114	1467887698	Glycyrrhetinate	1.1.1.146	1	Active
10114	1467887698	Glycyrrhetinate	1.1.1.146	1	Active
10114	1467887698	Glycyrrhetinate	1.1.1.146	1	Active
10114	1467887698	Glycyrrhetinate	1.1.1.146	1	Active
10114	1467887698	Glycyrrhetinate	1.1.1.146	1	Active
10114	1467887698	Glycyrrhetinate	1.1.1.146	1	Active
10114	1467887698	Glycyrrhetinate	1.1.1.146	1	Active
10114	1467887698	Glycyrrhetinate	1.1.1.146	1	Active
10114	1467887698	Glycyrrhetinate	1.1.1.146	1	Active
10114	1467887698	Glycyrrhetinate	1.1.1.146	1	Active
10114	1467887698	Glycyrrhetinate	1.1.1.146	1	Active
10114	1467887698	Glycyrrhetinate	1.1.1.146	1	Active
10114	1467887698	Glycyrrhetinate	1.1.1.-	1	Active
10114	1467887698	Glycyrrhetinate	1.1.1.-	1	Active
10114	1467887698	Glycyrrhetinate	1.1.1.-	1	Active
10114	1467887698	Glycyrrhetinate	1.1.1.-	1	Active
10114	1467887698	Glycyrrhetinate	1.1.1.146	1	Active
10114	1467887698	Glycyrrhetinate	1.1.1.146	1	Active
10114	1467887698	Glycyrrhetinate	1.1.1.146	1	Active
10114	1467887698	Glycyrrhetinate	1.1.1.-	1	Active
10621	1467950744	Hesperidin	3.2.1.166	1	Active
10621	1467950744	Hesperidin	3.2.1.166	1	Active
12560	1467884651	Erythromycin	2.1.1.37	1	Active
12594	1467903822	Dehydroepiandrosterone sulfate	3.1.6.2	1	Active
12594	1467903822	Dehydroepiandrosterone sulfate	3.1.6.2	1	Active
60838	1468012358	Irinotecan	3.1.1.7	1	Active
60838	1468012358	Irinotecan	3.1.1.7	1	Active
60838	1468012358	Irinotecan	3.1.1.7	1	Active
60838	1468012358	Irinotecan	3.1.1.7	1	Active
60838	1468012358	Irinotecan	3.1.1.7	1	Active
60838	1468012358	Irinotecan	3.1.1.7	1	Active
60838	1468012358	Irinotecan	3.1.1.7	1	Active
60838	1468012358	Irinotecan	3.1.1.7	1	Active
60961	1467868376	Adenosine	2.7.1.20	1	Active
60961	1467868376	Adenosine	2.7.1.20	1	Active
60961	1467868376	Adenosine	2.7.1.20	1	Active
60961	1467868376	Adenosine	2.7.1.67	1	Active
60961	1467868376	Adenosine	2.7.1.67	1	Active
60961	1467868376	Adenosine	2.7.1.67	1	Active
60961	1467868376	Adenosine	2.7.1.67	1	Active
60961	1467868376	Adenosine	2.7.1.67	1	Active
60961	1467868376	Adenosine	2.7.1.67	1	Active
60961	1467868376	Adenosine	2.7.1.67	1	Active
60961	1467868376	Adenosine	2.7.1.67	1	Active
60961	1467868376	Adenosine	3.2.2.6	1	Active
60961	1467868376	Adenosine	3.2.2.6	1	Active
60961	1467868376	Adenosine	2.7.1.67	1	Active
60961	1467868376	Adenosine	2.7.1.67	1	Active
64968	1467871146	dTTP	2.7.1.21	1	Active
64968	1467871146	dTTP	2.7.1.21	1	Active
64968	1467871146	dTTP	2.7.1.21	1	Active
64968	1467871146	dTTP	2.7.1.21	1	Active
65094	1468002135	25-Hydroxycholesterol	1.1.1.34	1	Active
73571	1467951695	Sakuranetin	1.14.13.39	1	Active
101771	1467984742	Allotetrahydrodeoxycorticosterone	1.1.1.49	1	Active
102030	1467907272	16alpha-Hydroxydehydroepiandrosterone	1.1.1.49	1	Active
107758	1467879341	1D-myo-Inositol 1,3,4,5-tetrakisphosphate	2.7.1.127	1	Active
111253	1467892483	3-Oxoglycyrrhetinate	1.1.1.-	1	Active
111253	1467892483	3-Oxoglycyrrhetinate	1.1.1.146	1	Active
123689	1467877028	N8-Acetylspermidine	1.5.3.13	1	Active
123814	1468005176	Angiotensin IV	3.4.11.3	1	Active
123814	1468005176	Angiotensin IV	3.4.11.3	1	Active
123814	1468005176	Angiotensin IV	3.4.11.2	1	Active
123814	1468005176	Angiotensin IV	3.4.11.3	1	Active
123814	1468005176	Angiotensin IV	3.4.11.3	1	Active
123814	1468005176	Angiotensin IV	3.4.11.2	1	Active
123814	1468005176	Angiotensin IV	3.4.11.3	1	Active
123814	1468005176	Angiotensin IV	3.4.11.2	1	Active
123895	1467913437	N(omega)-Hydroxyarginine	1.14.13.39	1	Active
152657	1467884789	L-Histidinal	1.1.1.23	1	Active
160617	1467877711	Orotidine 5'-phosphate	4.1.1.23	1	Active
160617	1467877711	Orotidine 5'-phosphate	4.1.1.23	1	Active
160617	1467877711	Orotidine 5'-phosphate	4.1.1.23	1	Active
161166	1467869724	L-Kynurenine	3.7.1.3	1	Active
161166	1467869724	L-Kynurenine	3.7.1.3	1	Active
164628	1467870119	dTDP	2.7.4.6	1	Active
165271	1467875398	L-Histidinol	1.1.1.23	1	Active
188803	1467978847	N-Acetylaspartylglutamate	3.4.17.21	1	Active
188803	1467978847	N-Acetylaspartylglutamate	3.4.17.21	1	Active
188803	1467978847	N-Acetylaspartylglutamate	3.4.17.21	1	Active
188803	1467978847	N-Acetylaspartylglutamate	3.4.17.21	1	Active
188803	1467978847	N-Acetylaspartylglutamate	3.4.17.21	1	Active
320374	4276239	(3S,8S,9S,10R,13S,14S,17S)-17-[(1S)-1-aminoethyl]-10,13-dimethyl-2,3,4,7,8,9,11,12,14,15,16,17-dodecahydro-1H-cyclopenta[a]phenanthren-3-ol	1.14.14.32	1	Active
320374	4276239	(3S,8S,9S,10R,13S,14S,17S)-17-[(1S)-1-aminoethyl]-10,13-dimethyl-2,3,4,7,8,9,11,12,14,15,16,17-dodecahydro-1H-cyclopenta[a]phenanthren-3-ol	1.14.14.32	1	Active
439268	1467872597	2-Deoxy-D-glucose	2.7.1.1	1	Active
439280	1467873155	5-Hydroxy-L-tryptophan	1.13.11.52	1	Active
439418	1467878092	(R)-5-Diphosphomevalonate	2.7.4.2	1	Active
442428	1467951178	Naringin	3.2.1.166	1	Active
444795	1467874429	Retinoate	1.14.14.53	1	Active
444899	1467868463	Arachidonate	1.14.14.14	1	Active
445127	1467870052	(S)-3-Hydroxy-3-methylglutaryl-CoA	2.3.3.10	1	Active
445713	1467871046	trans,trans-Farnesyl diphosphate	2.5.1.58	1	Active
445713	1467871046	trans,trans-Farnesyl diphosphate	2.5.1.58	1	Active
445713	1467871046	trans,trans-Farnesyl diphosphate	2.5.1.58	1	Active
445713	1467871046	trans,trans-Farnesyl diphosphate	2.5.1.59	1	Active
445713	1467871046	trans,trans-Farnesyl diphosphate	2.5.1.59	1	Active
445713	1467871046	trans,trans-Farnesyl diphosphate	2.5.1.59	1	Active
445713	1467871046	trans,trans-Farnesyl diphosphate	2.5.1.29	1	Active
445713	1467871046	trans,trans-Farnesyl diphosphate	2.5.1.29	1	Active
445713	1467871046	trans,trans-Farnesyl diphosphate	2.5.1.29	1	Active
445713	1467871046	trans,trans-Farnesyl diphosphate	2.5.1.21	1	Active
445713	1467871046	trans,trans-Farnesyl diphosphate	2.5.1.21	1	Active
445713	1467871046	trans,trans-Farnesyl diphosphate	2.5.1.21	1	Active
445995	1467869865	Geranyl diphosphate	2.5.1.10	1	Active
445995	1467869865	Geranyl diphosphate	2.5.1.21	1	Active
447277	1467870003	Geranylgeranyl diphosphate	2.5.1.29	1	Active
447277	1467870003	Geranylgeranyl diphosphate	2.5.1.29	1	Active
449304	1467895763	4-Phospho-D-erythronate	1.1.1.44	1	Active
644066	1467866633	Malonyl-CoA	2.3.1.21	1	Active
667490	1467888492	Thiopurine	2.4.2.8	1	Active
440624	1467908377	2-Methoxyestrone	1.1.1.62	0.993289	Active
65110	1467904765	1-(5'-Phosphoribosyl)-5-amino-4-imidazolecarboxamide	3.1.3.11	0.991525	Active
65110	1467904765	1-(5'-Phosphoribosyl)-5-amino-4-imidazolecarboxamide	3.1.3.11	0.991525	Active
65110	1467904765	1-(5'-Phosphoribosyl)-5-amino-4-imidazolecarboxamide	3.1.3.11	0.991525	Active
91477	1467872702	Cholest-4-en-3-one	1.14.15.29	0.987805	Active
91477	1467872702	Cholest-4-en-3-one	1.14.15.29	0.987805	Active
91477	1467872702	Cholest-4-en-3-one	1.14.15.29	0.987805	Active
91477	1467872702	Cholest-4-en-3-one	1.14.15.29	0.987805	Active
92132	1467893682	5beta-Cholestan-3-one	1.14.15.29	0.987805	Active
92132	1467893682	5beta-Cholestan-3-one	1.14.15.29	0.987805	Active
164628	1467870119	dTDP	2.7.4.6	0.984252	Active
164628	1467870119	dTDP	2.7.4.6	0.984252	Active
102030	1467907272	16alpha-Hydroxydehydroepiandrosterone	1.1.1.49	0.983696	Active
65094	1468002135	25-Hydroxycholesterol	1.1.1.34	0.981183	Active
65094	1468002135	25-Hydroxycholesterol	1.1.1.34	0.978552	Active
9700	1467870132	dTMP	2.7.4.9	0.975309	Active
9700	1467870132	dTMP	2.7.4.9	0.975309	Active
9700	1467870132	dTMP	2.7.4.9	0.975309	Active
9700	1467870132	dTMP	2.7.4.9	0.975309	Active
9700	1467870132	dTMP	2.7.4.9	0.975309	Active
9700	1467870132	dTMP	2.7.4.9	0.975309	Active
9700	1467870132	dTMP	2.7.4.9	0.975309	Active
9700	1467870132	dTMP	2.7.4.9	0.975309	Active
9700	1467870132	dTMP	2.7.4.9	0.975309	Active
9700	1467870132	dTMP	2.7.4.9	0.975309	Active
9700	1467870132	dTMP	2.7.4.9	0.975309	Active
9700	1467870132	dTMP	2.7.4.9	0.975309	Active
9700	1467870132	dTMP	2.7.4.9	0.975309	Active
9700	1467870132	dTMP	2.7.4.9	0.975309	Active
9700	1467870132	dTMP	2.7.4.9	0.975309	Active
9700	1467870132	dTMP	2.7.4.9	0.975309	Active
9700	1467870132	dTMP	2.7.4.9	0.975309	Active
9700	1467870132	dTMP	2.7.4.9	0.975309	Active
9700	1467870132	dTMP	2.7.4.9	0.975309	Active
9700	1467870132	dTMP	2.7.4.9	0.975309	Active
9700	1467870132	dTMP	2.7.4.9	0.975309	Active
9700	1467870132	dTMP	2.7.4.9	0.975309	Active
9700	1467870132	dTMP	2.7.4.9	0.975309	Active
9700	1467870132	dTMP	2.7.4.9	0.975309	Active
9700	1467870132	dTMP	2.7.4.9	0.975309	Active
9700	1467870132	dTMP	2.7.4.9	0.975309	Active
9700	1467870132	dTMP	2.7.4.9	0.975309	Active
9700	1467870132	dTMP	2.7.4.9	0.975309	Active
9700	1467870132	dTMP	2.7.4.9	0.975309	Active
9700	1467870132	dTMP	2.7.4.9	0.975309	Active
9700	1467870132	dTMP	2.7.4.9	0.975309	Active
9700	1467870132	dTMP	2.7.4.9	0.975309	Active
9700	1467870132	dTMP	2.7.4.9	0.975309	Active
9700	1467870132	dTMP	2.7.4.9	0.975309	Active
9700	1467870132	dTMP	2.7.4.9	0.975309	Active
9700	1467870132	dTMP	2.7.4.9	0.975309	Active
9700	1467870132	dTMP	2.7.4.9	0.975309	Active
9700	1467870132	dTMP	2.7.4.9	0.975309	Active
9700	1467870132	dTMP	2.7.4.9	0.975309	Active
9700	1467870132	dTMP	2.7.4.9	0.975309	Active
102030	1467907272	16alpha-Hydroxydehydroepiandrosterone	1.1.1.49	0.972973	Active
9700	1467870132	dTMP	2.7.1.21	0.971963	Active
64968	1467871146	dTTP	2.7.1.21	0.968153	Active
64968	1467871146	dTTP	2.7.1.21	0.968153	Active
64968	1467871146	dTTP	2.7.1.21	0.968153	Active
100299	2140811	(4aR,6R,7R,7aS)-6-(6-amino-8-chloro-9-purinyl)-2-hydroxy-2-oxo-4a,6,7,7a-tetrahydro-4H-furo[3,2-d][1,3,2]dioxaphosphorin-7-ol	3.1.4.53	0.964744	Active
100299	2140811	(4aR,6R,7R,7aS)-6-(6-amino-8-chloro-9-purinyl)-2-hydroxy-2-oxo-4a,6,7,7a-tetrahydro-4H-furo[3,2-d][1,3,2]dioxaphosphorin-7-ol	3.1.4.53	0.964744	Active
100299	2140811	(4aR,6R,7R,7aS)-6-(6-amino-8-chloro-9-purinyl)-2-hydroxy-2-oxo-4a,6,7,7a-tetrahydro-4H-furo[3,2-d][1,3,2]dioxaphosphorin-7-ol	3.1.4.53	0.964744	Active
100299	2140811	(4aR,6R,7R,7aS)-6-(6-amino-8-chloro-9-purinyl)-2-hydroxy-2-oxo-4a,6,7,7a-tetrahydro-4H-furo[3,2-d][1,3,2]dioxaphosphorin-7-ol	3.1.4.53	0.964744	Active
5789	1467868402	Thymidine	2.7.1.21	0.962121	Active
5789	1467868402	Thymidine	2.7.1.21	0.962121	Active
5789	1467868402	Thymidine	2.7.1.21	0.962121	Active
5789	1467868402	Thymidine	2.7.1.21	0.962121	Active
5789	1467868402	Thymidine	2.7.1.21	0.962121	Active
5789	1467868402	Thymidine	2.7.1.21	0.962121	Active
5789	1467868402	Thymidine	2.7.1.21	0.962121	Active
5789	1467868402	Thymidine	2.7.1.21	0.962121	Active
5789	1467868402	Thymidine	2.7.1.21	0.962121	Active
5789	1467868402	Thymidine	2.7.1.21	0.962121	Active
5789	1467868402	Thymidine	2.7.1.21	0.962121	Active
5789	1467868402	Thymidine	2.7.1.21	0.962121	Active
5789	1467868402	Thymidine	2.7.1.21	0.962121	Active
5789	1467868402	Thymidine	2.7.1.21	0.962121	Active
5789	1467868402	Thymidine	2.7.1.21	0.962121	Active
5789	1467868402	Thymidine	2.7.1.21	0.962121	Active
5789	1467868402	Thymidine	2.7.1.21	0.962121	Active
5789	1467868402	Thymidine	2.7.1.21	0.962121	Active
5789	1467868402	Thymidine	2.7.1.21	0.962121	Active
5789	1467868402	Thymidine	2.7.1.21	0.962121	Active
5789	1467868402	Thymidine	2.7.1.21	0.962121	Active
5789	1467868402	Thymidine	2.7.1.21	0.962121	Active
5789	1467868402	Thymidine	2.7.1.21	0.962121	Active
5865	1467926053	Prednisone	1.14.14.-	0.96063	Active
65094	1468002135	25-Hydroxycholesterol	1.1.1.34	0.960526	Active
65094	1468002135	25-Hydroxycholesterol	1.1.1.34	0.958005	Active
101771	1467984742	Allotetrahydrodeoxycorticosterone	1.1.1.49	0.956656	Active
644066	1467866633	Malonyl-CoA	2.3.1.21	0.956204	Active
100299	2140811	(4aR,6R,7R,7aS)-6-(6-amino-8-chloro-9-purinyl)-2-hydroxy-2-oxo-4a,6,7,7a-tetrahydro-4H-furo[3,2-d][1,3,2]dioxaphosphorin-7-ol	3.1.4.53	0.955414	Active
100299	2140811	(4aR,6R,7R,7aS)-6-(6-amino-8-chloro-9-purinyl)-2-hydroxy-2-oxo-4a,6,7,7a-tetrahydro-4H-furo[3,2-d][1,3,2]dioxaphosphorin-7-ol	3.1.4.53	0.955414	Active
100299	2140811	(4aR,6R,7R,7aS)-6-(6-amino-8-chloro-9-purinyl)-2-hydroxy-2-oxo-4a,6,7,7a-tetrahydro-4H-furo[3,2-d][1,3,2]dioxaphosphorin-7-ol	3.1.4.53	0.955414	Active
100299	2140811	(4aR,6R,7R,7aS)-6-(6-amino-8-chloro-9-purinyl)-2-hydroxy-2-oxo-4a,6,7,7a-tetrahydro-4H-furo[3,2-d][1,3,2]dioxaphosphorin-7-ol	3.1.4.53	0.955414	Active
444795	1467874429	Retinoate	1.13.11.-	0.953642	Active
102030	1467907272	16alpha-Hydroxydehydroepiandrosterone	1.1.1.49	0.952756	Active
164628	1467870119	dTDP	2.7.4.6	0.947368	Active
101771	1467984742	Allotetrahydrodeoxycorticosterone	1.1.1.49	0.945652	Active
5865	1467926053	Prednisone	1.14.14.-	0.945312	Active
65407	1468045418	NBMPR	2.7.1.20	0.945055	Active
65407	1468045418	NBMPR	2.7.1.20	0.945055	Active
65407	1468045418	NBMPR	2.7.1.20	0.945055	Active
65407	1468045418	NBMPR	2.7.1.20	0.945055	Active
65049	1468013295	Spongothymidine	2.7.1.21	0.944915	Active
65049	1468013295	Spongothymidine	2.7.1.21	0.944915	Active
65049	1468013295	Spongothymidine	2.7.1.21	0.944915	Active
65049	1468013295	Spongothymidine	2.7.1.21	0.944915	Active
102030	1467907272	16alpha-Hydroxydehydroepiandrosterone	1.1.1.49	0.941953	Active
644066	1467866633	Malonyl-CoA	2.3.1.21	0.941606	Active
17513	1467904648	Acadesine	3.1.3.48	0.939699	Active
65094	1468002135	25-Hydroxycholesterol	1.1.1.34	0.938992	Active
65094	1468002135	25-Hydroxycholesterol	1.1.1.34	0.938992	Active
164628	1467870119	dTDP	2.7.4.6	0.932836	Active
5865	1467926053	Prednisone	1.14.14.-	0.929134	Active
5789	1467868402	Thymidine	2.7.1.21	0.927007	Active
5789	1467868402	Thymidine	2.7.1.21	0.927007	Active
5789	1467868402	Thymidine	2.7.1.21	0.927007	Active
5789	1467868402	Thymidine	2.7.1.21	0.927007	Active
5789	1467868402	Thymidine	2.7.1.21	0.927007	Active
5789	1467868402	Thymidine	2.7.1.21	0.927007	Active
5789	1467868402	Thymidine	2.7.1.21	0.927007	Active
5789	1467868402	Thymidine	2.7.1.21	0.927007	Active
5789	1467868402	Thymidine	2.7.1.21	0.927007	Active
5789	1467868402	Thymidine	2.7.1.21	0.927007	Active
5789	1467868402	Thymidine	2.7.1.21	0.927007	Active
5789	1467868402	Thymidine	2.7.1.21	0.927007	Active
5789	1467868402	Thymidine	2.7.1.21	0.927007	Active
5789	1467868402	Thymidine	2.7.1.21	0.927007	Active
5789	1467868402	Thymidine	2.7.1.21	0.927007	Active
5789	1467868402	Thymidine	2.7.1.21	0.927007	Active
5789	1467868402	Thymidine	2.7.1.21	0.927007	Active
5789	1467868402	Thymidine	2.7.1.21	0.927007	Active
5789	1467868402	Thymidine	2.7.1.21	0.927007	Active
5789	1467868402	Thymidine	2.7.1.21	0.927007	Active
5789	1467868402	Thymidine	2.7.1.21	0.927007	Active
5789	1467868402	Thymidine	2.7.1.21	0.927007	Active
5789	1467868402	Thymidine	2.7.1.21	0.927007	Active
17513	1467904648	Acadesine	3.1.3.48	0.925743	Active
17513	1467904648	Acadesine	3.1.3.48	0.925743	Active
65110	1467904765	1-(5'-Phosphoribosyl)-5-amino-4-imidazolecarboxamide	3.1.3.11	0.92562	Active
65110	1467904765	1-(5'-Phosphoribosyl)-5-amino-4-imidazolecarboxamide	3.1.3.11	0.92562	Active
65094	1468002135	25-Hydroxycholesterol	1.1.1.34	0.924282	Active
102030	1467907272	16alpha-Hydroxydehydroepiandrosterone	1.1.1.49	0.924282	Active
5865	1467926053	Prednisone	1.14.14.-	0.924242	Active
9700	1467870132	dTMP	2.7.4.9	0.91954	Active
9700	1467870132	dTMP	2.7.4.9	0.91954	Active
9700	1467870132	dTMP	2.7.4.9	0.91954	Active
9700	1467870132	dTMP	2.7.4.9	0.91954	Active
9700	1467870132	dTMP	2.7.4.9	0.91954	Active
9700	1467870132	dTMP	2.7.4.9	0.91954	Active
9700	1467870132	dTMP	2.7.4.9	0.91954	Active
9700	1467870132	dTMP	2.7.4.9	0.91954	Active
9700	1467870132	dTMP	2.7.4.9	0.91954	Active
9700	1467870132	dTMP	2.7.4.9	0.91954	Active
9700	1467870132	dTMP	2.7.4.9	0.91954	Active
9700	1467870132	dTMP	2.7.4.9	0.91954	Active
9700	1467870132	dTMP	2.7.4.9	0.91954	Active
9700	1467870132	dTMP	2.7.4.9	0.91954	Active
9700	1467870132	dTMP	2.7.4.9	0.91954	Active
9700	1467870132	dTMP	2.7.4.9	0.91954	Active
9700	1467870132	dTMP	2.7.4.9	0.91954	Active
9700	1467870132	dTMP	2.7.4.9	0.91954	Active
9700	1467870132	dTMP	2.7.4.9	0.91954	Active
9700	1467870132	dTMP	2.7.4.9	0.91954	Active
9700	1467870132	dTMP	2.7.4.9	0.91954	Active
9700	1467870132	dTMP	2.7.4.9	0.91954	Active
9700	1467870132	dTMP	2.7.4.9	0.91954	Active
9700	1467870132	dTMP	2.7.4.9	0.91954	Active
9700	1467870132	dTMP	2.7.4.9	0.91954	Active
9700	1467870132	dTMP	2.7.4.9	0.91954	Active
9700	1467870132	dTMP	2.7.4.9	0.91954	Active
9700	1467870132	dTMP	2.7.4.9	0.91954	Active
9700	1467870132	dTMP	2.7.1.21	0.91954	Active
9700	1467870132	dTMP	2.7.4.9	0.91954	Active
9700	1467870132	dTMP	2.7.4.9	0.91954	Active
9700	1467870132	dTMP	2.7.4.9	0.91954	Active
9700	1467870132	dTMP	2.7.4.9	0.91954	Active
9700	1467870132	dTMP	2.7.4.9	0.91954	Active
9700	1467870132	dTMP	2.7.4.9	0.91954	Active
9700	1467870132	dTMP	2.7.4.9	0.91954	Active
9700	1467870132	dTMP	2.7.4.9	0.91954	Active
9700	1467870132	dTMP	2.7.4.9	0.91954	Active
9700	1467870132	dTMP	2.7.4.9	0.91954	Active
9700	1467870132	dTMP	2.7.4.9	0.91954	Active
9700	1467870132	dTMP	2.7.4.9	0.91954	Active
65110	1467904765	1-(5'-Phosphoribosyl)-5-amino-4-imidazolecarboxamide	3.1.3.11	0.915254	Active
65110	1467904765	1-(5'-Phosphoribosyl)-5-amino-4-imidazolecarboxamide	3.1.3.11	0.915254	Active
5865	1467926053	Prednisone	1.14.14.-	0.914062	Active
9700	1467870132	dTMP	2.7.1.21	0.913043	Active
65094	1468002135	25-Hydroxycholesterol	1.1.1.34	0.9125	Active
65407	1468045418	NBMPR	2.7.1.20	0.911661	Active
65407	1468045418	NBMPR	2.7.1.20	0.911661	Active
65407	1468045418	NBMPR	2.7.1.20	0.911661	Active
65407	1468045418	NBMPR	2.7.1.20	0.911661	Active
72327	716796	1-[(2R,3S,4R,5R)-3-fluoro-4-hydroxy-5-(hydroxymethyl)-2-oxolanyl]-5-methylpyrimidine-2,4-dione	2.7.1.21	0.908537	Active
72327	716796	1-[(2R,3S,4R,5R)-3-fluoro-4-hydroxy-5-(hydroxymethyl)-2-oxolanyl]-5-methylpyrimidine-2,4-dione	2.7.1.21	0.908537	Active
9700	1467870132	dTMP	2.7.1.21	0.901786	Active
9700	1467870132	dTMP	2.7.1.21	0.901786	Active
60838	1468012358	Irinotecan	3.1.1.7	0.901786	Active
60838	1468012358	Irinotecan	3.1.1.7	0.901786	Active
60838	1468012358	Irinotecan	3.1.1.7	0.901786	Active
60838	1468012358	Irinotecan	3.1.1.7	0.901786	Active
60838	1468012358	Irinotecan	3.1.1.7	0.901786	Active
60838	1468012358	Irinotecan	3.1.1.7	0.901786	Active
60838	1468012358	Irinotecan	3.1.1.7	0.901786	Active
60838	1468012358	Irinotecan	3.1.1.7	0.901786	Active
17513	1467904648	Acadesine	3.1.3.48	0.901478	Active
20469	1467921745	Beclomethasone	1.14.14.-	0.900709	Active
9700	1467870132	dTMP	2.7.4.9	0.897727	Active
9700	1467870132	dTMP	2.7.4.9	0.897727	Active
9700	1467870132	dTMP	2.7.4.9	0.897727	Active
9700	1467870132	dTMP	2.7.4.9	0.897727	Active
9700	1467870132	dTMP	2.7.4.9	0.897727	Active
9700	1467870132	dTMP	2.7.4.9	0.897727	Active
9700	1467870132	dTMP	2.7.4.9	0.897727	Active
9700	1467870132	dTMP	2.7.4.9	0.897727	Active
9700	1467870132	dTMP	2.7.4.9	0.897727	Active
9700	1467870132	dTMP	2.7.4.9	0.897727	Active
9700	1467870132	dTMP	2.7.4.9	0.897727	Active
9700	1467870132	dTMP	2.7.4.9	0.897727	Active
9700	1467870132	dTMP	2.7.4.9	0.897727	Active
9700	1467870132	dTMP	2.7.4.9	0.897727	Active
9700	1467870132	dTMP	2.7.4.9	0.897727	Active
9700	1467870132	dTMP	2.7.4.9	0.897727	Active
9700	1467870132	dTMP	2.7.4.9	0.897727	Active
9700	1467870132	dTMP	2.7.4.9	0.897727	Active
9700	1467870132	dTMP	2.7.4.9	0.897727	Active
9700	1467870132	dTMP	2.7.4.9	0.897727	Active
9700	1467870132	dTMP	2.7.4.9	0.897727	Active
9700	1467870132	dTMP	2.7.4.9	0.897727	Active
9700	1467870132	dTMP	2.7.4.9	0.897727	Active
9700	1467870132	dTMP	2.7.4.9	0.897727	Active
9700	1467870132	dTMP	2.7.4.9	0.897727	Active
9700	1467870132	dTMP	2.7.4.9	0.897727	Active
9700	1467870132	dTMP	2.7.4.9	0.897727	Active
9700	1467870132	dTMP	2.7.4.9	0.897727	Active
9700	1467870132	dTMP	2.7.4.9	0.897727	Active
9700	1467870132	dTMP	2.7.4.9	0.897727	Active
9700	1467870132	dTMP	2.7.4.9	0.897727	Active
9700	1467870132	dTMP	2.7.4.9	0.897727	Active
9700	1467870132	dTMP	2.7.4.9	0.897727	Active
9700	1467870132	dTMP	2.7.4.9	0.897727	Active
9700	1467870132	dTMP	2.7.4.9	0.897727	Active
9700	1467870132	dTMP	2.7.4.9	0.897727	Active
9700	1467870132	dTMP	2.7.4.9	0.897727	Active
9700	1467870132	dTMP	2.7.4.9	0.897727	Active
9700	1467870132	dTMP	2.7.4.9	0.897727	Active
9700	1467870132	dTMP	2.7.4.9	0.897727	Active
6013	1467872060	Testosterone	1.3.1.22	0.897281	Active
6013	1467872060	Testosterone	1.3.1.22	0.897281	Active
65049	1468013295	Spongothymidine	2.7.1.21	0.895582	Active
65049	1468013295	Spongothymidine	2.7.1.21	0.895582	Active
65049	1468013295	Spongothymidine	2.7.1.21	0.895582	Active
65049	1468013295	Spongothymidine	2.7.1.21	0.895582	Active
188323	1468022339	7-Methylcapillarisin	1.14.13.39	0.894737	Active
5865	1467926053	Prednisone	1.14.14.-	0.893939	Active
5870	1467871230	Estrone	1.1.1.62	0.888889	Active
5870	1467871230	Estrone	1.1.1.62	0.888889	Active
5870	1467871230	Estrone	1.1.1.62	0.888889	Active
5870	1467871230	Estrone	1.1.1.62	0.888889	Active
5870	1467871230	Estrone	1.1.1.62	0.888889	Active
5870	1467871230	Estrone	1.1.1.62	0.888889	Active
5870	1467871230	Estrone	1.1.1.62	0.888889	Active
5870	1467871230	Estrone	1.1.1.62	0.888889	Active
440624	1467908377	2-Methoxyestrone	1.1.1.62	0.883582	Active
65110	1467904765	1-(5'-Phosphoribosyl)-5-amino-4-imidazolecarboxamide	3.1.3.11	0.882075	Active
65094	1468002135	25-Hydroxycholesterol	1.1.1.34	0.876485	Active
65094	1468002135	25-Hydroxycholesterol	1.1.1.34	0.876485	Active
65094	1468002135	25-Hydroxycholesterol	1.1.1.34	0.876485	Active
20469	1467921745	Beclomethasone	1.14.14.-	0.87234	Active
50313	500071	1-[(2R,3S,4R,5R)-3-fluoro-4-hydroxy-5-(hydroxymethyl)-2-oxolanyl]-5-iodopyrimidine-2,4-dione	2.7.1.21	0.871951	Active
50313	500071	1-[(2R,3S,4R,5R)-3-fluoro-4-hydroxy-5-(hydroxymethyl)-2-oxolanyl]-5-iodopyrimidine-2,4-dione	2.7.1.21	0.871951	Active
50313	500071	1-[(2R,3S,4R,5R)-3-fluoro-4-hydroxy-5-(hydroxymethyl)-2-oxolanyl]-5-iodopyrimidine-2,4-dione	2.7.1.21	0.871951	Active
72327	716796	1-[(2R,3S,4R,5R)-3-fluoro-4-hydroxy-5-(hydroxymethyl)-2-oxolanyl]-5-methylpyrimidine-2,4-dione	2.7.1.21	0.871951	Active
72327	716796	1-[(2R,3S,4R,5R)-3-fluoro-4-hydroxy-5-(hydroxymethyl)-2-oxolanyl]-5-methylpyrimidine-2,4-dione	2.7.1.21	0.871951	Active
60961	1467868376	Adenosine	3.2.2.6	0.868895	Active
60961	1467868376	Adenosine	3.2.2.6	0.868895	Active
445713	1467871046	trans,trans-Farnesyl diphosphate	2.5.1.58	0.867347	Active
445713	1467871046	trans,trans-Farnesyl diphosphate	2.5.1.59	0.867347	Active
445713	1467871046	trans,trans-Farnesyl diphosphate	2.5.1.29	0.867347	Active
445713	1467871046	trans,trans-Farnesyl diphosphate	2.5.1.21	0.867347	Active
445995	1467869865	Geranyl diphosphate	2.5.1.10	0.867347	Active
445995	1467869865	Geranyl diphosphate	2.5.1.21	0.867347	Active
447277	1467870003	Geranylgeranyl diphosphate	2.5.1.29	0.867347	Active
102030	1467907272	16alpha-Hydroxydehydroepiandrosterone	1.1.1.49	0.866485	Active
20469	1467921745	Beclomethasone	1.14.14.-	0.865248	Active
2907	1467930227	Cyclophosphamide	1.14.14.-	0.863309	Active
5870	1467871230	Estrone	1.1.1.62	0.854103	Active
5870	1467871230	Estrone	1.1.1.62	0.854103	Active
5870	1467871230	Estrone	1.1.1.62	0.854103	Active
5870	1467871230	Estrone	1.1.1.62	0.854103	Active
5870	1467871230	Estrone	1.1.1.62	0.854103	Active
5870	1467871230	Estrone	1.1.1.62	0.854103	Active
5870	1467871230	Estrone	1.1.1.62	0.854103	Active
5870	1467871230	Estrone	1.1.1.62	0.854103	Active
5881	1467878934	Dehydroepiandrosterone	1.1.1.49	0.854103	Active
5881	1467878934	Dehydroepiandrosterone	1.1.1.49	0.854103	Active
5881	1467878934	Dehydroepiandrosterone	1.1.1.49	0.854103	Active
5881	1467878934	Dehydroepiandrosterone	1.1.1.49	0.854103	Active
20469	1467921745	Beclomethasone	1.14.14.-	0.852113	Active
65110	1467904765	1-(5'-Phosphoribosyl)-5-amino-4-imidazolecarboxamide	3.1.3.11	0.85124	Active
65110	1467904765	1-(5'-Phosphoribosyl)-5-amino-4-imidazolecarboxamide	3.1.3.11	0.85124	Active
5789	1467868402	Thymidine	2.7.1.21	0.85	Active
5789	1467868402	Thymidine	2.7.1.21	0.85	Active
5789	1467868402	Thymidine	2.7.1.21	0.85	Active
5789	1467868402	Thymidine	2.7.1.21	0.85	Active
5789	1467868402	Thymidine	2.7.1.21	0.85	Active
5789	1467868402	Thymidine	2.7.1.21	0.85	Active
5789	1467868402	Thymidine	2.7.1.21	0.85	Active
5789	1467868402	Thymidine	2.7.1.21	0.85	Active
5789	1467868402	Thymidine	2.7.1.21	0.85	Active
5789	1467868402	Thymidine	2.7.1.21	0.85	Active
5789	1467868402	Thymidine	2.7.1.21	0.85	Active
5789	1467868402	Thymidine	2.7.1.21	0.85	Active
5789	1467868402	Thymidine	2.7.1.21	0.85	Active
5789	1467868402	Thymidine	2.7.1.21	0.85	Active
5789	1467868402	Thymidine	2.7.1.21	0.85	Active
5789	1467868402	Thymidine	2.7.1.21	0.85	Active
5789	1467868402	Thymidine	2.7.1.21	0.85	Active
5789	1467868402	Thymidine	2.7.1.21	0.85	Active
5789	1467868402	Thymidine	2.7.1.21	0.85	Active
5789	1467868402	Thymidine	2.7.1.21	0.85	Active
5789	1467868402	Thymidine	2.7.1.21	0.85	Active
5789	1467868402	Thymidine	2.7.1.21	0.85	Active
5789	1467868402	Thymidine	2.7.1.21	0.85	Active
5865	1467926053	Prednisone	1.14.14.-	0.849894	Active
440624	1467908377	2-Methoxyestrone	1.1.1.62	0.848943	Active
7055	1467987545	2-Methylnaphthalene	1.14.13.-	0.848837	Active
7055	1467987545	2-Methylnaphthalene	1.14.13.-	0.848837	Active
439268	1467872597	2-Deoxy-D-glucose	2.7.1.1	0.846154	Active
65110	1467904765	1-(5'-Phosphoribosyl)-5-amino-4-imidazolecarboxamide	3.1.3.11	0.844262	Active
50313	500071	1-[(2R,3S,4R,5R)-3-fluoro-4-hydroxy-5-(hydroxymethyl)-2-oxolanyl]-5-iodopyrimidine-2,4-dione	2.7.1.21	0.841176	Active
50313	500071	1-[(2R,3S,4R,5R)-3-fluoro-4-hydroxy-5-(hydroxymethyl)-2-oxolanyl]-5-iodopyrimidine-2,4-dione	2.7.1.21	0.841176	Active
50313	500071	1-[(2R,3S,4R,5R)-3-fluoro-4-hydroxy-5-(hydroxymethyl)-2-oxolanyl]-5-iodopyrimidine-2,4-dione	2.7.1.21	0.841176	Active
50313	500071	1-[(2R,3S,4R,5R)-3-fluoro-4-hydroxy-5-(hydroxymethyl)-2-oxolanyl]-5-iodopyrimidine-2,4-dione	2.7.1.21	0.841176	Active
50313	500071	1-[(2R,3S,4R,5R)-3-fluoro-4-hydroxy-5-(hydroxymethyl)-2-oxolanyl]-5-iodopyrimidine-2,4-dione	2.7.1.21	0.841176	Active
50313	500071	1-[(2R,3S,4R,5R)-3-fluoro-4-hydroxy-5-(hydroxymethyl)-2-oxolanyl]-5-iodopyrimidine-2,4-dione	2.7.1.21	0.841176	Active
72327	716796	1-[(2R,3S,4R,5R)-3-fluoro-4-hydroxy-5-(hydroxymethyl)-2-oxolanyl]-5-methylpyrimidine-2,4-dione	2.7.1.21	0.841176	Active
72327	716796	1-[(2R,3S,4R,5R)-3-fluoro-4-hydroxy-5-(hydroxymethyl)-2-oxolanyl]-5-methylpyrimidine-2,4-dione	2.7.1.21	0.841176	Active
5991	1467927526	Ethynyl estradiol	1.14.14.1	0.839339	Active
5991	1467927526	Ethynyl estradiol	1.14.14.-	0.839339	Active
92097	1467937130	Taraxerol	1.14.13.39	0.837128	Active
20469	1467921745	Beclomethasone	1.14.14.-	0.836879	Active
9700	1467870132	dTMP	2.7.1.21	0.834711	Active
9700	1467870132	dTMP	2.7.1.21	0.834711	Active
60961	1467868376	Adenosine	3.2.2.6	0.82906	Active
60961	1467868376	Adenosine	3.2.2.6	0.82906	Active
43157	432058	5-ethynyl-1H-pyrimidine-2,4-dione	1.3.1.2	0.82716	Active
102030	1467907272	16alpha-Hydroxydehydroepiandrosterone	1.1.1.49	0.824277	Active
20469	1467921745	Beclomethasone	1.14.14.-	0.823944	Active
126	1467873025	4-Hydroxybenzaldehyde	1.2.1.24	0.821429	Active
65110	1467904765	1-(5'-Phosphoribosyl)-5-amino-4-imidazolecarboxamide	3.1.3.11	0.818898	Active
2605	27355	6-(1,1,4,4-tetramethyltetralin-6-carbonyl)naphthalene-2-carboxylic acid	1.14.13.-	0.818182	Active
2605	27355	6-(1,1,4,4-tetramethyltetralin-6-carbonyl)naphthalene-2-carboxylic acid	1.14.13.-	0.818182	Active
5879	1467871919	Androsterone	1.1.1.64	0.799427	Active
5881	1467878934	Dehydroepiandrosterone	1.1.1.49	0.799427	Active
5881	1467878934	Dehydroepiandrosterone	1.1.1.49	0.799427	Active
5881	1467878934	Dehydroepiandrosterone	1.1.1.49	0.799427	Active
5881	1467878934	Dehydroepiandrosterone	1.1.1.49	0.799427	Active
50313	500071	1-[(2R,3S,4R,5R)-3-fluoro-4-hydroxy-5-(hydroxymethyl)-2-oxolanyl]-5-iodopyrimidine-2,4-dione	2.7.1.21	0.791667	Active
50313	500071	1-[(2R,3S,4R,5R)-3-fluoro-4-hydroxy-5-(hydroxymethyl)-2-oxolanyl]-5-iodopyrimidine-2,4-dione	2.7.1.21	0.791667	Active
50313	500071	1-[(2R,3S,4R,5R)-3-fluoro-4-hydroxy-5-(hydroxymethyl)-2-oxolanyl]-5-iodopyrimidine-2,4-dione	2.7.1.21	0.791667	Active
72327	716796	1-[(2R,3S,4R,5R)-3-fluoro-4-hydroxy-5-(hydroxymethyl)-2-oxolanyl]-5-methylpyrimidine-2,4-dione	2.7.1.21	0.791667	Active
72327	716796	1-[(2R,3S,4R,5R)-3-fluoro-4-hydroxy-5-(hydroxymethyl)-2-oxolanyl]-5-methylpyrimidine-2,4-dione	2.7.1.21	0.791667	Active
188323	1468022339	7-Methylcapillarisin	1.14.13.39	0.785515	Active
439182	1467907679	5'-Deoxyadenosine	2.4.2.28	0.782609	Active
64945	1467941399	Ursolic acid	1.1.1.146	0.781711	Active
64945	1467941399	Ursolic acid	1.1.1.146	0.781711	Active
65407	1468045418	NBMPR	2.7.1.20	0.779221	Active
65407	1468045418	NBMPR	2.7.1.20	0.779221	Active
65407	1468045418	NBMPR	2.7.1.20	0.779221	Active
65407	1468045418	NBMPR	2.7.1.20	0.779221	Active
5757	1467876271	Estradiol-17beta	1.1.1.62	0.778426	Active
101771	1467984742	Allotetrahydrodeoxycorticosterone	1.1.1.49	0.778175	Active
249266	1467990222	2-Chlorobiphenyl	1.14.13.-	0.777778	Active
123689	1467877028	N8-Acetylspermidine	1.5.3.13	0.774834	Active
50313	500071	1-[(2R,3S,4R,5R)-3-fluoro-4-hydroxy-5-(hydroxymethyl)-2-oxolanyl]-5-iodopyrimidine-2,4-dione	2.7.1.21	0.772727	Active
50313	500071	1-[(2R,3S,4R,5R)-3-fluoro-4-hydroxy-5-(hydroxymethyl)-2-oxolanyl]-5-iodopyrimidine-2,4-dione	2.7.1.21	0.772727	Active
50313	500071	1-[(2R,3S,4R,5R)-3-fluoro-4-hydroxy-5-(hydroxymethyl)-2-oxolanyl]-5-iodopyrimidine-2,4-dione	2.7.1.21	0.772727	Active
72327	716796	1-[(2R,3S,4R,5R)-3-fluoro-4-hydroxy-5-(hydroxymethyl)-2-oxolanyl]-5-methylpyrimidine-2,4-dione	2.7.1.21	0.772727	Active
72327	716796	1-[(2R,3S,4R,5R)-3-fluoro-4-hydroxy-5-(hydroxymethyl)-2-oxolanyl]-5-methylpyrimidine-2,4-dione	2.7.1.21	0.772727	Active
5881	1467878934	Dehydroepiandrosterone	1.1.1.49	0.76776	Active
5881	1467878934	Dehydroepiandrosterone	1.1.1.49	0.76776	Active
5881	1467878934	Dehydroepiandrosterone	1.1.1.49	0.76776	Active
5881	1467878934	Dehydroepiandrosterone	1.1.1.49	0.76776	Active
102030	1467907272	16alpha-Hydroxydehydroepiandrosterone	1.1.1.49	0.765668	Active
10114	1467887698	Glycyrrhetinate	1.1.1.-	0.757143	Active
10114	1467887698	Glycyrrhetinate	1.1.1.-	0.757143	Active
10114	1467887698	Glycyrrhetinate	1.1.1.-	0.757143	Active
10114	1467887698	Glycyrrhetinate	1.1.1.146	0.757143	Active
10114	1467887698	Glycyrrhetinate	1.1.1.146	0.757143	Active
10114	1467887698	Glycyrrhetinate	1.1.1.146	0.757143	Active
10114	1467887698	Glycyrrhetinate	1.1.1.146	0.757143	Active
10114	1467887698	Glycyrrhetinate	1.1.1.146	0.757143	Active
10114	1467887698	Glycyrrhetinate	1.1.1.146	0.757143	Active
10114	1467887698	Glycyrrhetinate	1.1.1.146	0.757143	Active
10114	1467887698	Glycyrrhetinate	1.1.1.146	0.757143	Active
10114	1467887698	Glycyrrhetinate	1.1.1.146	0.757143	Active
10114	1467887698	Glycyrrhetinate	1.1.1.146	0.757143	Active
10114	1467887698	Glycyrrhetinate	1.1.1.146	0.757143	Active
10114	1467887698	Glycyrrhetinate	1.1.1.146	0.757143	Active
10114	1467887698	Glycyrrhetinate	1.1.1.146	0.757143	Active
10114	1467887698	Glycyrrhetinate	1.1.1.-	0.757143	Active
10114	1467887698	Glycyrrhetinate	1.1.1.-	0.757143	Active
10114	1467887698	Glycyrrhetinate	1.1.1.-	0.757143	Active
10114	1467887698	Glycyrrhetinate	1.1.1.-	0.757143	Active
10114	1467887698	Glycyrrhetinate	1.1.1.146	0.757143	Active
10114	1467887698	Glycyrrhetinate	1.1.1.146	0.757143	Active
10114	1467887698	Glycyrrhetinate	1.1.1.146	0.757143	Active
10114	1467887698	Glycyrrhetinate	1.1.1.-	0.757143	Active
1548953	1467922396	Clomiphene	1.14.14.-	0.752277	Active
245872	1467997085	17beta-(1H-Imidazol-4-yl)androst-5-en-3beta-ol	1.14.14.32	0.752158	Active
20469	1467921745	Beclomethasone	1.14.14.-	0.751256	Active
64945	1467941399	Ursolic acid	1.1.1.146	0.750725	Active
64945	1467941399	Ursolic acid	1.1.1.146	0.750725	Active
12921	1467933839	Sterculic acid	1.14.19.1	0.745455	Active
12921	1467933839	Sterculic acid	1.14.19.1	0.745455	Active
442428	1467951178	Naringin	3.2.1.166	0.74103	Active
10393	1467914452	4-Hydroxyphenylethanol	1.14.18.1	0.737864	Active
10393	1467914452	4-Hydroxyphenylethanol	1.14.18.1	0.737864	Active
10393	1467914452	4-Hydroxyphenylethanol	1.14.18.1	0.737864	Active
10393	1467914452	4-Hydroxyphenylethanol	1.14.18.1	0.737864	Active
439418	1467878092	(R)-5-Diphosphomevalonate	2.7.4.2	0.737864	Active
1183	1467874207	4-Hydroxy-3-methoxy-benzaldehyde	1.2.1.24	0.736842	Active
10114	1467887698	Glycyrrhetinate	1.1.1.-	0.72766	Active
10114	1467887698	Glycyrrhetinate	1.1.1.-	0.72766	Active
10114	1467887698	Glycyrrhetinate	1.1.1.-	0.72766	Active
10114	1467887698	Glycyrrhetinate	1.1.1.146	0.72766	Active
10114	1467887698	Glycyrrhetinate	1.1.1.146	0.72766	Active
10114	1467887698	Glycyrrhetinate	1.1.1.146	0.72766	Active
10114	1467887698	Glycyrrhetinate	1.1.1.146	0.72766	Active
10114	1467887698	Glycyrrhetinate	1.1.1.146	0.72766	Active
10114	1467887698	Glycyrrhetinate	1.1.1.146	0.72766	Active
10114	1467887698	Glycyrrhetinate	1.1.1.146	0.72766	Active
10114	1467887698	Glycyrrhetinate	1.1.1.146	0.72766	Active
10114	1467887698	Glycyrrhetinate	1.1.1.146	0.72766	Active
10114	1467887698	Glycyrrhetinate	1.1.1.146	0.72766	Active
10114	1467887698	Glycyrrhetinate	1.1.1.146	0.72766	Active
10114	1467887698	Glycyrrhetinate	1.1.1.146	0.72766	Active
10114	1467887698	Glycyrrhetinate	1.1.1.146	0.72766	Active
10114	1467887698	Glycyrrhetinate	1.1.1.-	0.72766	Active
10114	1467887698	Glycyrrhetinate	1.1.1.-	0.72766	Active
10114	1467887698	Glycyrrhetinate	1.1.1.-	0.72766	Active
10114	1467887698	Glycyrrhetinate	1.1.1.-	0.72766	Active
10114	1467887698	Glycyrrhetinate	1.1.1.146	0.72766	Active
10114	1467887698	Glycyrrhetinate	1.1.1.146	0.72766	Active
10114	1467887698	Glycyrrhetinate	1.1.1.146	0.72766	Active
10114	1467887698	Glycyrrhetinate	1.1.1.-	0.72766	Active
10114	1467887698	Glycyrrhetinate	1.1.1.-	0.727528	Active
10114	1467887698	Glycyrrhetinate	1.1.1.-	0.727528	Active
10114	1467887698	Glycyrrhetinate	1.1.1.-	0.727528	Active
10114	1467887698	Glycyrrhetinate	1.1.1.146	0.727528	Active
10114	1467887698	Glycyrrhetinate	1.1.1.146	0.727528	Active
10114	1467887698	Glycyrrhetinate	1.1.1.146	0.727528	Active
10114	1467887698	Glycyrrhetinate	1.1.1.146	0.727528	Active
10114	1467887698	Glycyrrhetinate	1.1.1.146	0.727528	Active
10114	1467887698	Glycyrrhetinate	1.1.1.146	0.727528	Active
10114	1467887698	Glycyrrhetinate	1.1.1.146	0.727528	Active
10114	1467887698	Glycyrrhetinate	1.1.1.146	0.727528	Active
10114	1467887698	Glycyrrhetinate	1.1.1.146	0.727528	Active
10114	1467887698	Glycyrrhetinate	1.1.1.146	0.727528	Active
10114	1467887698	Glycyrrhetinate	1.1.1.146	0.727528	Active
10114	1467887698	Glycyrrhetinate	1.1.1.146	0.727528	Active
10114	1467887698	Glycyrrhetinate	1.1.1.146	0.727528	Active
10114	1467887698	Glycyrrhetinate	1.1.1.-	0.727528	Active
10114	1467887698	Glycyrrhetinate	1.1.1.-	0.727528	Active
10114	1467887698	Glycyrrhetinate	1.1.1.-	0.727528	Active
10114	1467887698	Glycyrrhetinate	1.1.1.-	0.727528	Active
10114	1467887698	Glycyrrhetinate	1.1.1.146	0.727528	Active
10114	1467887698	Glycyrrhetinate	1.1.1.146	0.727528	Active
10114	1467887698	Glycyrrhetinate	1.1.1.146	0.727528	Active
10114	1467887698	Glycyrrhetinate	1.3.1.3	0.727528	Active
10114	1467887698	Glycyrrhetinate	1.1.1.-	0.727528	Active
102030	1467907272	16alpha-Hydroxydehydroepiandrosterone	1.1.1.49	0.727412	Active
73571	1467951695	Sakuranetin	1.14.13.39	0.726619	Active
82153	1467923051	Flunisolide	1.14.14.-	0.721591	Active
102030	1467907272	16alpha-Hydroxydehydroepiandrosterone	1.1.1.49	0.72093	Active
64982	1467954063	Baicalin	2.7.11.1	0.72067	Active
64982	1467954063	Baicalin	2.7.11.1	0.72067	Active
123689	1467877028	N8-Acetylspermidine	1.5.3.13	0.716418	Active
679	1467967456	Dimethyl sulfoxide	2.1.1.-	0.714286	Active
5789	1467868402	Thymidine	2.7.1.21	0.708333	Active
5789	1467868402	Thymidine	2.7.1.21	0.708333	Active
5789	1467868402	Thymidine	2.7.1.21	0.708333	Active
5789	1467868402	Thymidine	2.7.1.21	0.708333	Active
5789	1467868402	Thymidine	2.7.1.21	0.708333	Active
5789	1467868402	Thymidine	2.7.1.21	0.708333	Active
5789	1467868402	Thymidine	2.7.1.21	0.708333	Active
5789	1467868402	Thymidine	2.7.1.21	0.708333	Active
5789	1467868402	Thymidine	2.7.1.21	0.708333	Active
5789	1467868402	Thymidine	2.7.1.21	0.708333	Active
5789	1467868402	Thymidine	2.7.1.21	0.708333	Active
5789	1467868402	Thymidine	2.7.1.21	0.708333	Active
5789	1467868402	Thymidine	2.7.1.21	0.708333	Active
5789	1467868402	Thymidine	2.7.1.21	0.708333	Active
5789	1467868402	Thymidine	2.7.1.21	0.708333	Active
5789	1467868402	Thymidine	2.7.1.21	0.708333	Active
5789	1467868402	Thymidine	2.7.1.21	0.708333	Active
5789	1467868402	Thymidine	2.7.1.21	0.708333	Active
5789	1467868402	Thymidine	2.7.1.21	0.708333	Active
5789	1467868402	Thymidine	2.7.1.21	0.708333	Active
5789	1467868402	Thymidine	2.7.1.21	0.708333	Active
5789	1467868402	Thymidine	2.7.1.21	0.708333	Active
5789	1467868402	Thymidine	2.7.1.21	0.708333	Active
320374	4276239	(3S,8S,9S,10R,13S,14S,17S)-17-[(1S)-1-aminoethyl]-10,13-dimethyl-2,3,4,7,8,9,11,12,14,15,16,17-dodecahydro-1H-cyclopenta[a]phenanthren-3-ol	1.14.14.32	0.708108	Active
1662	1467898309	3-Hydroxy-3-methylglutarate	1.1.1.34	0.706294	Active
1662	1467898309	3-Hydroxy-3-methylglutarate	1.1.1.34	0.706294	Active
41774	1467921414	Acarbose	3.2.1.1	0.706147	Active
41774	1467921414	Acarbose	3.2.1.20	0.706147	Active
41774	1467921414	Acarbose	3.2.1.20	0.706147	Active
41774	1467921414	Acarbose	3.2.1.1	0.706147	Active
41774	1467921414	Acarbose	3.2.1.1	0.706147	Active
41774	1467921414	Acarbose	3.2.1.20	0.706147	Active
41774	1467921414	Acarbose	3.2.1.1	0.706147	Active
41774	1467921414	Acarbose	3.2.1.1	0.706147	Active
41774	1467921414	Acarbose	3.2.1.1	0.706147	Active
41774	1467921414	Acarbose	3.2.1.1	0.706147	Active
41774	1467921414	Acarbose	3.2.1.20	0.706147	Active
41774	1467921414	Acarbose	3.2.1.1	0.706147	Active
5879	1467871919	Androsterone	1.1.1.64	0.699789	Active
82153	1467923051	Flunisolide	1.14.14.-	0.698864	Active
17513	1467904648	Acadesine	3.1.3.48	0.696262	Active
5757	1467876271	Estradiol-17beta	1.1.1.62	0.694444	Active
5870	1467871230	Estrone	1.1.1.62	0.694444	Active
5870	1467871230	Estrone	1.1.1.62	0.694444	Active
5870	1467871230	Estrone	1.1.1.62	0.694444	Active
5870	1467871230	Estrone	1.1.1.62	0.694444	Active
5870	1467871230	Estrone	1.1.1.62	0.694444	Active
5870	1467871230	Estrone	1.1.1.62	0.694444	Active
5870	1467871230	Estrone	1.1.1.62	0.694444	Active
5870	1467871230	Estrone	1.1.1.62	0.694444	Active
5879	1467871919	Androsterone	1.1.1.64	0.694444	Active
65049	1468013295	Spongothymidine	2.7.1.21	0.693727	Active
65049	1468013295	Spongothymidine	2.7.1.21	0.693727	Active
65049	1468013295	Spongothymidine	2.7.1.21	0.693727	Active
65049	1468013295	Spongothymidine	2.7.1.21	0.693727	Active
82153	1467923051	Flunisolide	1.14.14.-	0.693182	Active
440624	1467908377	2-Methoxyestrone	1.1.1.62	0.690608	Active
1662	1467898309	3-Hydroxy-3-methylglutarate	1.1.1.34	0.686567	Active
1662	1467898309	3-Hydroxy-3-methylglutarate	1.1.1.34	0.686567	Active
82153	1467923051	Flunisolide	1.14.14.-	0.683616	Active
5789	1467868402	Thymidine	2.7.1.21	0.68323	Active
5789	1467868402	Thymidine	2.7.1.21	0.68323	Active
5789	1467868402	Thymidine	2.7.1.21	0.68323	Active
5789	1467868402	Thymidine	2.7.1.21	0.68323	Active
5789	1467868402	Thymidine	2.7.1.21	0.68323	Active
5789	1467868402	Thymidine	2.7.1.21	0.68323	Active
5789	1467868402	Thymidine	2.7.1.21	0.68323	Active
5789	1467868402	Thymidine	2.7.1.21	0.68323	Active
5789	1467868402	Thymidine	2.7.1.21	0.68323	Active
5789	1467868402	Thymidine	2.7.1.21	0.68323	Active
5789	1467868402	Thymidine	2.7.1.21	0.68323	Active
5789	1467868402	Thymidine	2.7.1.21	0.68323	Active
5789	1467868402	Thymidine	2.7.1.21	0.68323	Active
5789	1467868402	Thymidine	2.7.1.21	0.68323	Active
5789	1467868402	Thymidine	2.7.1.21	0.68323	Active
5789	1467868402	Thymidine	2.7.1.21	0.68323	Active
5789	1467868402	Thymidine	2.7.1.21	0.68323	Active
5789	1467868402	Thymidine	2.7.1.21	0.68323	Active
5789	1467868402	Thymidine	2.7.1.21	0.68323	Active
5789	1467868402	Thymidine	2.7.1.21	0.68323	Active
5789	1467868402	Thymidine	2.7.1.21	0.68323	Active
5789	1467868402	Thymidine	2.7.1.21	0.68323	Active
5789	1467868402	Thymidine	2.7.1.21	0.68323	Active
65110	1467904765	1-(5'-Phosphoribosyl)-5-amino-4-imidazolecarboxamide	3.1.3.11	0.68254	Active
5789	1467868402	Thymidine	2.7.1.21	0.679012	Active
5789	1467868402	Thymidine	2.7.1.21	0.679012	Active
5789	1467868402	Thymidine	2.7.1.21	0.679012	Active
5789	1467868402	Thymidine	2.7.1.21	0.679012	Active
5789	1467868402	Thymidine	2.7.1.21	0.679012	Active
5789	1467868402	Thymidine	2.7.1.21	0.679012	Active
5789	1467868402	Thymidine	2.7.1.21	0.679012	Active
5789	1467868402	Thymidine	2.7.1.21	0.679012	Active
5789	1467868402	Thymidine	2.7.1.21	0.679012	Active
5789	1467868402	Thymidine	2.7.1.21	0.679012	Active
5789	1467868402	Thymidine	2.7.1.21	0.679012	Active
5789	1467868402	Thymidine	2.7.1.21	0.679012	Active
5789	1467868402	Thymidine	2.7.1.21	0.679012	Active
5789	1467868402	Thymidine	2.7.1.21	0.679012	Active
5789	1467868402	Thymidine	2.7.1.21	0.679012	Active
5789	1467868402	Thymidine	2.7.1.21	0.679012	Active
5789	1467868402	Thymidine	2.7.1.21	0.679012	Active
5789	1467868402	Thymidine	2.7.1.21	0.679012	Active
5789	1467868402	Thymidine	2.7.1.21	0.679012	Active
5789	1467868402	Thymidine	2.7.1.21	0.679012	Active
5789	1467868402	Thymidine	2.7.1.21	0.679012	Active
5789	1467868402	Thymidine	2.7.1.21	0.679012	Active
5789	1467868402	Thymidine	2.7.1.21	0.679012	Active
5789	1467868402	Thymidine	2.7.1.21	0.67284	Active
5789	1467868402	Thymidine	2.7.1.21	0.67284	Active
5789	1467868402	Thymidine	2.7.1.21	0.67284	Active
5789	1467868402	Thymidine	2.7.1.21	0.67284	Active
5789	1467868402	Thymidine	2.7.1.21	0.67284	Active
5789	1467868402	Thymidine	2.7.1.21	0.67284	Active
5789	1467868402	Thymidine	2.7.1.21	0.67284	Active
5789	1467868402	Thymidine	2.7.1.21	0.67284	Active
5789	1467868402	Thymidine	2.7.1.21	0.67284	Active
5789	1467868402	Thymidine	2.7.1.21	0.67284	Active
5789	1467868402	Thymidine	2.7.1.21	0.67284	Active
5789	1467868402	Thymidine	2.7.1.21	0.67284	Active
5789	1467868402	Thymidine	2.7.1.21	0.67284	Active
5789	1467868402	Thymidine	2.7.1.21	0.67284	Active
5789	1467868402	Thymidine	2.7.1.21	0.67284	Active
5789	1467868402	Thymidine	2.7.1.21	0.67284	Active
5789	1467868402	Thymidine	2.7.1.21	0.67284	Active
5789	1467868402	Thymidine	2.7.1.21	0.67284	Active
5789	1467868402	Thymidine	2.7.1.21	0.67284	Active
5789	1467868402	Thymidine	2.7.1.21	0.67284	Active
5789	1467868402	Thymidine	2.7.1.21	0.67284	Active
5789	1467868402	Thymidine	2.7.1.21	0.67284	Active
5789	1467868402	Thymidine	2.7.1.21	0.67284	Active
17513	1467904648	Acadesine	3.1.3.48	0.672811	Active
82153	1467923051	Flunisolide	1.14.14.-	0.670455	Active
5879	1467871919	Androsterone	1.1.1.64	0.669544	Active
442793	1467959583	[6]-Gingerol	4.2.1.152	0.666667	Active
60961	1467868376	Adenosine	3.2.2.6	0.665924	Active
60961	1467868376	Adenosine	3.2.2.6	0.665924	Active
82153	1467923051	Flunisolide	1.14.14.-	0.661017	Active
5942	1467895694	Norspermidine	2.5.1.46	0.658537	Active
323	3485	Coumarin	1.14.13.-	0.656627	Active
644066	1467866633	Malonyl-CoA	2.3.1.21	0.654545	Active
439418	1467878092	(R)-5-Diphosphomevalonate	2.7.4.2	0.654412	Active
439418	1467878092	(R)-5-Diphosphomevalonate	2.7.4.2	0.654412	Active
439418	1467878092	(R)-5-Diphosphomevalonate	2.7.4.2	0.654412	Active
73571	1467951695	Sakuranetin	1.14.13.39	0.65243	Active
445713	1467871046	trans,trans-Farnesyl diphosphate	2.7.1.36	0.651163	Active
447277	1467870003	Geranylgeranyl diphosphate	2.7.1.36	0.651163	Active
439418	1467878092	(R)-5-Diphosphomevalonate	2.7.4.2	0.649254	Active
9700	1467870132	dTMP	2.7.1.21	0.647436	Active
65110	1467904765	1-(5'-Phosphoribosyl)-5-amino-4-imidazolecarboxamide	3.1.3.11	0.646617	Active
64945	1467941399	Ursolic acid	1.1.1.146	0.64532	Active
64945	1467941399	Ursolic acid	1.1.1.146	0.64532	Active
4685	1467923675	1,4-Dichlorobenzene	1.14.13.-	0.643836	Active
4685	1467923675	1,4-Dichlorobenzene	1.14.13.-	0.643836	Active
323	3485	Coumarin	1.14.13.-	0.642857	Active
10718	110824	4-benzamido-2-hydroxybenzoic acid	3.5.1.98	0.642857	Active
10718	110824	4-benzamido-2-hydroxybenzoic acid	3.5.1.98	0.642857	Active
5757	1467876271	Estradiol-17beta	1.1.1.62	0.642366	Active
10114	1467887698	Glycyrrhetinate	1.1.1.-	0.642366	Active
10114	1467887698	Glycyrrhetinate	1.1.1.-	0.642366	Active
10114	1467887698	Glycyrrhetinate	1.1.1.-	0.642366	Active
10114	1467887698	Glycyrrhetinate	1.1.1.146	0.642366	Active
10114	1467887698	Glycyrrhetinate	1.1.1.146	0.642366	Active
10114	1467887698	Glycyrrhetinate	1.1.1.146	0.642366	Active
10114	1467887698	Glycyrrhetinate	1.1.1.146	0.642366	Active
10114	1467887698	Glycyrrhetinate	1.1.1.146	0.642366	Active
10114	1467887698	Glycyrrhetinate	1.1.1.146	0.642366	Active
10114	1467887698	Glycyrrhetinate	1.1.1.146	0.642366	Active
10114	1467887698	Glycyrrhetinate	1.1.1.146	0.642366	Active
10114	1467887698	Glycyrrhetinate	1.1.1.146	0.642366	Active
10114	1467887698	Glycyrrhetinate	1.1.1.146	0.642366	Active
10114	1467887698	Glycyrrhetinate	1.1.1.146	0.642366	Active
10114	1467887698	Glycyrrhetinate	1.1.1.146	0.642366	Active
10114	1467887698	Glycyrrhetinate	1.1.1.146	0.642366	Active
10114	1467887698	Glycyrrhetinate	1.1.1.-	0.642366	Active
10114	1467887698	Glycyrrhetinate	1.1.1.-	0.642366	Active
10114	1467887698	Glycyrrhetinate	1.1.1.-	0.642366	Active
10114	1467887698	Glycyrrhetinate	1.1.1.-	0.642366	Active
10114	1467887698	Glycyrrhetinate	1.1.1.146	0.642366	Active
10114	1467887698	Glycyrrhetinate	1.1.1.146	0.642366	Active
10114	1467887698	Glycyrrhetinate	1.1.1.146	0.642366	Active
10114	1467887698	Glycyrrhetinate	1.1.1.-	0.642366	Active
43157	432058	5-ethynyl-1H-pyrimidine-2,4-dione	1.3.1.2	0.641975	Active
439268	1467872597	2-Deoxy-D-glucose	2.7.1.1	0.638376	Active
5879	1467871919	Androsterone	1.1.1.64	0.636577	Active
5881	1467878934	Dehydroepiandrosterone	1.1.1.49	0.635974	Active
5881	1467878934	Dehydroepiandrosterone	1.1.1.49	0.635974	Active
5881	1467878934	Dehydroepiandrosterone	1.1.1.49	0.635974	Active
5881	1467878934	Dehydroepiandrosterone	1.1.1.49	0.635974	Active
644066	1467866633	Malonyl-CoA	2.3.1.21	0.632937	Active
65407	1468045418	NBMPR	2.7.1.20	0.631579	Active
65407	1468045418	NBMPR	2.7.1.20	0.631579	Active
65407	1468045418	NBMPR	2.7.1.20	0.631579	Active
65407	1468045418	NBMPR	2.7.1.20	0.631579	Active
5879	1467871919	Androsterone	1.1.1.64	0.629723	Active
5879	1467871919	Androsterone	1.1.1.64	0.629297	Active
50313	500071	1-[(2R,3S,4R,5R)-3-fluoro-4-hydroxy-5-(hydroxymethyl)-2-oxolanyl]-5-iodopyrimidine-2,4-dione	2.7.1.21	0.628571	Active
50313	500071	1-[(2R,3S,4R,5R)-3-fluoro-4-hydroxy-5-(hydroxymethyl)-2-oxolanyl]-5-iodopyrimidine-2,4-dione	2.7.1.21	0.628571	Active
50313	500071	1-[(2R,3S,4R,5R)-3-fluoro-4-hydroxy-5-(hydroxymethyl)-2-oxolanyl]-5-iodopyrimidine-2,4-dione	2.7.1.21	0.628571	Active
72327	716796	1-[(2R,3S,4R,5R)-3-fluoro-4-hydroxy-5-(hydroxymethyl)-2-oxolanyl]-5-methylpyrimidine-2,4-dione	2.7.1.21	0.628571	Active
72327	716796	1-[(2R,3S,4R,5R)-3-fluoro-4-hydroxy-5-(hydroxymethyl)-2-oxolanyl]-5-methylpyrimidine-2,4-dione	2.7.1.21	0.628571	Active
64945	1467941399	Ursolic acid	1.1.1.146	0.62775	Active
64945	1467941399	Ursolic acid	1.1.1.146	0.62775	Active
64945	1467941399	Ursolic acid	1.1.1.146	0.62775	Active
64945	1467941399	Ursolic acid	1.1.1.146	0.62775	Active
64945	1467941399	Ursolic acid	1.1.1.146	0.62775	Active
64945	1467941399	Ursolic acid	1.1.1.146	0.62775	Active
64945	1467941399	Ursolic acid	1.1.1.146	0.62775	Active
64945	1467941399	Ursolic acid	1.1.1.146	0.62775	Active
65110	1467904765	1-(5'-Phosphoribosyl)-5-amino-4-imidazolecarboxamide	3.1.3.11	0.627737	Active
50313	500071	1-[(2R,3S,4R,5R)-3-fluoro-4-hydroxy-5-(hydroxymethyl)-2-oxolanyl]-5-iodopyrimidine-2,4-dione	2.7.1.21	0.625	Active
50313	500071	1-[(2R,3S,4R,5R)-3-fluoro-4-hydroxy-5-(hydroxymethyl)-2-oxolanyl]-5-iodopyrimidine-2,4-dione	2.7.1.21	0.625	Active
50313	500071	1-[(2R,3S,4R,5R)-3-fluoro-4-hydroxy-5-(hydroxymethyl)-2-oxolanyl]-5-iodopyrimidine-2,4-dione	2.7.1.21	0.625	Active
72327	716796	1-[(2R,3S,4R,5R)-3-fluoro-4-hydroxy-5-(hydroxymethyl)-2-oxolanyl]-5-methylpyrimidine-2,4-dione	2.7.1.21	0.625	Active
72327	716796	1-[(2R,3S,4R,5R)-3-fluoro-4-hydroxy-5-(hydroxymethyl)-2-oxolanyl]-5-methylpyrimidine-2,4-dione	2.7.1.21	0.625	Active
5879	1467871919	Androsterone	1.1.1.64	0.623421	Active
10114	1467887698	Glycyrrhetinate	1.1.1.-	0.622821	Active
10114	1467887698	Glycyrrhetinate	1.1.1.-	0.622821	Active
10114	1467887698	Glycyrrhetinate	1.1.1.-	0.622821	Active
10114	1467887698	Glycyrrhetinate	1.1.1.146	0.622821	Active
10114	1467887698	Glycyrrhetinate	1.1.1.146	0.622821	Active
10114	1467887698	Glycyrrhetinate	1.1.1.146	0.622821	Active
10114	1467887698	Glycyrrhetinate	1.1.1.146	0.622821	Active
10114	1467887698	Glycyrrhetinate	1.1.1.146	0.622821	Active
10114	1467887698	Glycyrrhetinate	1.1.1.146	0.622821	Active
10114	1467887698	Glycyrrhetinate	1.1.1.146	0.622821	Active
10114	1467887698	Glycyrrhetinate	1.1.1.146	0.622821	Active
10114	1467887698	Glycyrrhetinate	1.1.1.146	0.622821	Active
10114	1467887698	Glycyrrhetinate	1.1.1.146	0.622821	Active
10114	1467887698	Glycyrrhetinate	1.1.1.146	0.622821	Active
10114	1467887698	Glycyrrhetinate	1.1.1.146	0.622821	Active
10114	1467887698	Glycyrrhetinate	1.1.1.146	0.622821	Active
10114	1467887698	Glycyrrhetinate	1.1.1.-	0.622821	Active
10114	1467887698	Glycyrrhetinate	1.1.1.-	0.622821	Active
10114	1467887698	Glycyrrhetinate	1.1.1.-	0.622821	Active
10114	1467887698	Glycyrrhetinate	1.1.1.-	0.622821	Active
10114	1467887698	Glycyrrhetinate	1.1.1.146	0.622821	Active
10114	1467887698	Glycyrrhetinate	1.1.1.146	0.622821	Active
10114	1467887698	Glycyrrhetinate	1.1.1.146	0.622821	Active
10114	1467887698	Glycyrrhetinate	1.1.1.-	0.622821	Active
439418	1467878092	(R)-5-Diphosphomevalonate	2.7.4.2	0.622378	Active
439418	1467878092	(R)-5-Diphosphomevalonate	2.7.4.2	0.622378	Active
5879	1467871919	Androsterone	1.1.1.64	0.62013	Active
5757	1467876271	Estradiol-17beta	1.1.1.62	0.619808	Active
50313	500071	1-[(2R,3S,4R,5R)-3-fluoro-4-hydroxy-5-(hydroxymethyl)-2-oxolanyl]-5-iodopyrimidine-2,4-dione	2.7.1.21	0.619318	Active
50313	500071	1-[(2R,3S,4R,5R)-3-fluoro-4-hydroxy-5-(hydroxymethyl)-2-oxolanyl]-5-iodopyrimidine-2,4-dione	2.7.1.21	0.619318	Active
50313	500071	1-[(2R,3S,4R,5R)-3-fluoro-4-hydroxy-5-(hydroxymethyl)-2-oxolanyl]-5-iodopyrimidine-2,4-dione	2.7.1.21	0.619318	Active
72327	716796	1-[(2R,3S,4R,5R)-3-fluoro-4-hydroxy-5-(hydroxymethyl)-2-oxolanyl]-5-methylpyrimidine-2,4-dione	2.7.1.21	0.619318	Active
72327	716796	1-[(2R,3S,4R,5R)-3-fluoro-4-hydroxy-5-(hydroxymethyl)-2-oxolanyl]-5-methylpyrimidine-2,4-dione	2.7.1.21	0.619318	Active
5881	1467878934	Dehydroepiandrosterone	1.1.1.49	0.617874	Active
5881	1467878934	Dehydroepiandrosterone	1.1.1.49	0.617874	Active
5881	1467878934	Dehydroepiandrosterone	1.1.1.49	0.617874	Active
5881	1467878934	Dehydroepiandrosterone	1.1.1.49	0.617874	Active
65110	1467904765	1-(5'-Phosphoribosyl)-5-amino-4-imidazolecarboxamide	3.1.3.11	0.614286	Active
444795	1467874429	Retinoate	4.1.1.17	0.611111	Active
164628	1467870119	dTDP	2.7.4.6	0.607427	Active
164628	1467870119	dTDP	2.7.4.6	0.607427	Active
1567207	16299815	(6-chloro-2-oxo-4-phenyl-chromen-7-yl) 2-(tert-butoxycarbonylamino)acetate	3.1.1.47	0.606715	Active
1567207	16299815	(6-chloro-2-oxo-4-phenyl-chromen-7-yl) 2-(tert-butoxycarbonylamino)acetate	3.1.1.47	0.606715	Active
5879	1467871919	Androsterone	1.1.1.64	0.606498	Active
41774	1467921414	Acarbose	3.2.1.1	0.606383	Active
41774	1467921414	Acarbose	3.2.1.20	0.606383	Active
41774	1467921414	Acarbose	3.2.1.20	0.606383	Active
41774	1467921414	Acarbose	3.2.1.1	0.606383	Active
41774	1467921414	Acarbose	3.2.1.1	0.606383	Active
41774	1467921414	Acarbose	3.2.1.20	0.606383	Active
41774	1467921414	Acarbose	3.2.1.1	0.606383	Active
41774	1467921414	Acarbose	3.2.1.1	0.606383	Active
41774	1467921414	Acarbose	3.2.1.1	0.606383	Active
41774	1467921414	Acarbose	3.2.1.1	0.606383	Active
41774	1467921414	Acarbose	3.2.1.20	0.606383	Active
41774	1467921414	Acarbose	3.2.1.1	0.606383	Active
5879	1467871919	Androsterone	1.1.1.64	0.605755	Active
1183	1467874207	4-Hydroxy-3-methoxy-benzaldehyde	1.2.1.24	0.605263	Active
5879	1467871919	Androsterone	1.1.1.64	0.60522	Active
10114	1467887698	Glycyrrhetinate	1.1.1.-	0.60522	Active
10114	1467887698	Glycyrrhetinate	1.1.1.-	0.60522	Active
10114	1467887698	Glycyrrhetinate	1.1.1.-	0.60522	Active
10114	1467887698	Glycyrrhetinate	1.1.1.-	0.60522	Active
10114	1467887698	Glycyrrhetinate	1.1.1.-	0.60522	Active
10114	1467887698	Glycyrrhetinate	1.1.1.-	0.60522	Active
10114	1467887698	Glycyrrhetinate	1.1.1.-	0.60522	Active
10114	1467887698	Glycyrrhetinate	1.1.1.-	0.60522	Active
10114	1467887698	Glycyrrhetinate	1.1.1.-	0.60522	Active
10114	1467887698	Glycyrrhetinate	1.1.1.-	0.60522	Active
10114	1467887698	Glycyrrhetinate	1.1.1.-	0.60522	Active
10114	1467887698	Glycyrrhetinate	1.1.1.-	0.60522	Active
10114	1467887698	Glycyrrhetinate	1.1.1.-	0.60522	Active
10114	1467887698	Glycyrrhetinate	1.1.1.-	0.60522	Active
10114	1467887698	Glycyrrhetinate	1.1.1.-	0.60522	Active
10114	1467887698	Glycyrrhetinate	1.1.1.146	0.60522	Active
10114	1467887698	Glycyrrhetinate	1.1.1.146	0.60522	Active
10114	1467887698	Glycyrrhetinate	1.1.1.146	0.60522	Active
10114	1467887698	Glycyrrhetinate	1.1.1.146	0.60522	Active
10114	1467887698	Glycyrrhetinate	1.1.1.146	0.60522	Active
10114	1467887698	Glycyrrhetinate	1.1.1.146	0.60522	Active
10114	1467887698	Glycyrrhetinate	1.1.1.146	0.60522	Active
10114	1467887698	Glycyrrhetinate	1.1.1.146	0.60522	Active
10114	1467887698	Glycyrrhetinate	1.1.1.146	0.60522	Active
10114	1467887698	Glycyrrhetinate	1.1.1.146	0.60522	Active
10114	1467887698	Glycyrrhetinate	1.1.1.146	0.60522	Active
10114	1467887698	Glycyrrhetinate	1.1.1.146	0.60522	Active
10114	1467887698	Glycyrrhetinate	1.1.1.146	0.60522	Active
10114	1467887698	Glycyrrhetinate	1.1.1.146	0.60522	Active
10114	1467887698	Glycyrrhetinate	1.1.1.146	0.60522	Active
10114	1467887698	Glycyrrhetinate	1.1.1.146	0.60522	Active
10114	1467887698	Glycyrrhetinate	1.1.1.146	0.60522	Active
10114	1467887698	Glycyrrhetinate	1.1.1.146	0.60522	Active
10114	1467887698	Glycyrrhetinate	1.1.1.146	0.60522	Active
10114	1467887698	Glycyrrhetinate	1.1.1.146	0.60522	Active
10114	1467887698	Glycyrrhetinate	1.1.1.146	0.60522	Active
10114	1467887698	Glycyrrhetinate	1.1.1.146	0.60522	Active
10114	1467887698	Glycyrrhetinate	1.1.1.146	0.60522	Active
10114	1467887698	Glycyrrhetinate	1.1.1.146	0.60522	Active
10114	1467887698	Glycyrrhetinate	1.1.1.146	0.60522	Active
10114	1467887698	Glycyrrhetinate	1.1.1.146	0.60522	Active
10114	1467887698	Glycyrrhetinate	1.1.1.146	0.60522	Active
10114	1467887698	Glycyrrhetinate	1.1.1.146	0.60522	Active
10114	1467887698	Glycyrrhetinate	1.1.1.146	0.60522	Active
10114	1467887698	Glycyrrhetinate	1.1.1.146	0.60522	Active
10114	1467887698	Glycyrrhetinate	1.1.1.146	0.60522	Active
10114	1467887698	Glycyrrhetinate	1.1.1.146	0.60522	Active
10114	1467887698	Glycyrrhetinate	1.1.1.146	0.60522	Active
10114	1467887698	Glycyrrhetinate	1.1.1.146	0.60522	Active
10114	1467887698	Glycyrrhetinate	1.1.1.146	0.60522	Active
10114	1467887698	Glycyrrhetinate	1.1.1.146	0.60522	Active
10114	1467887698	Glycyrrhetinate	1.1.1.146	0.60522	Active
10114	1467887698	Glycyrrhetinate	1.1.1.146	0.60522	Active
10114	1467887698	Glycyrrhetinate	1.1.1.146	0.60522	Active
10114	1467887698	Glycyrrhetinate	1.1.1.146	0.60522	Active
10114	1467887698	Glycyrrhetinate	1.1.1.146	0.60522	Active
10114	1467887698	Glycyrrhetinate	1.1.1.146	0.60522	Active
10114	1467887698	Glycyrrhetinate	1.1.1.146	0.60522	Active
10114	1467887698	Glycyrrhetinate	1.1.1.146	0.60522	Active
10114	1467887698	Glycyrrhetinate	1.1.1.146	0.60522	Active
10114	1467887698	Glycyrrhetinate	1.1.1.146	0.60522	Active
10114	1467887698	Glycyrrhetinate	1.1.1.146	0.60522	Active
10114	1467887698	Glycyrrhetinate	1.1.1.146	0.60522	Active
10114	1467887698	Glycyrrhetinate	1.1.1.146	0.60522	Active
10114	1467887698	Glycyrrhetinate	1.1.1.146	0.60522	Active
10114	1467887698	Glycyrrhetinate	1.1.1.146	0.60522	Active
10114	1467887698	Glycyrrhetinate	1.1.1.146	0.60522	Active
10114	1467887698	Glycyrrhetinate	1.1.1.146	0.60522	Active
10114	1467887698	Glycyrrhetinate	1.1.1.146	0.60522	Active
10114	1467887698	Glycyrrhetinate	1.1.1.146	0.60522	Active
10114	1467887698	Glycyrrhetinate	1.1.1.146	0.60522	Active
10114	1467887698	Glycyrrhetinate	1.1.1.146	0.60522	Active
10114	1467887698	Glycyrrhetinate	1.1.1.146	0.60522	Active
10114	1467887698	Glycyrrhetinate	1.1.1.146	0.60522	Active
10114	1467887698	Glycyrrhetinate	1.1.1.146	0.60522	Active
10114	1467887698	Glycyrrhetinate	1.1.1.146	0.60522	Active
10114	1467887698	Glycyrrhetinate	1.1.1.146	0.60522	Active
10114	1467887698	Glycyrrhetinate	1.1.1.146	0.60522	Active
10114	1467887698	Glycyrrhetinate	1.1.1.146	0.60522	Active
10114	1467887698	Glycyrrhetinate	1.1.1.146	0.60522	Active
10114	1467887698	Glycyrrhetinate	1.1.1.-	0.60522	Active
10114	1467887698	Glycyrrhetinate	1.1.1.-	0.60522	Active
10114	1467887698	Glycyrrhetinate	1.1.1.-	0.60522	Active
10114	1467887698	Glycyrrhetinate	1.1.1.-	0.60522	Active
10114	1467887698	Glycyrrhetinate	1.1.1.-	0.60522	Active
10114	1467887698	Glycyrrhetinate	1.1.1.-	0.60522	Active
10114	1467887698	Glycyrrhetinate	1.1.1.-	0.60522	Active
10114	1467887698	Glycyrrhetinate	1.1.1.-	0.60522	Active
10114	1467887698	Glycyrrhetinate	1.1.1.-	0.60522	Active
10114	1467887698	Glycyrrhetinate	1.1.1.-	0.60522	Active
10114	1467887698	Glycyrrhetinate	1.1.1.-	0.60522	Active
10114	1467887698	Glycyrrhetinate	1.1.1.-	0.60522	Active
10114	1467887698	Glycyrrhetinate	1.1.1.-	0.60522	Active
10114	1467887698	Glycyrrhetinate	1.1.1.-	0.60522	Active
10114	1467887698	Glycyrrhetinate	1.1.1.-	0.60522	Active
10114	1467887698	Glycyrrhetinate	1.1.1.-	0.60522	Active
10114	1467887698	Glycyrrhetinate	1.1.1.-	0.60522	Active
10114	1467887698	Glycyrrhetinate	1.1.1.-	0.60522	Active
10114	1467887698	Glycyrrhetinate	1.1.1.-	0.60522	Active
10114	1467887698	Glycyrrhetinate	1.1.1.-	0.60522	Active
10114	1467887698	Glycyrrhetinate	1.1.1.146	0.60522	Active
10114	1467887698	Glycyrrhetinate	1.1.1.146	0.60522	Active
10114	1467887698	Glycyrrhetinate	1.1.1.146	0.60522	Active
10114	1467887698	Glycyrrhetinate	1.1.1.146	0.60522	Active
10114	1467887698	Glycyrrhetinate	1.1.1.146	0.60522	Active
10114	1467887698	Glycyrrhetinate	1.1.1.146	0.60522	Active
10114	1467887698	Glycyrrhetinate	1.1.1.146	0.60522	Active
10114	1467887698	Glycyrrhetinate	1.1.1.146	0.60522	Active
10114	1467887698	Glycyrrhetinate	1.1.1.146	0.60522	Active
10114	1467887698	Glycyrrhetinate	1.1.1.146	0.60522	Active
10114	1467887698	Glycyrrhetinate	1.1.1.146	0.60522	Active
10114	1467887698	Glycyrrhetinate	1.1.1.146	0.60522	Active
10114	1467887698	Glycyrrhetinate	1.1.1.146	0.60522	Active
10114	1467887698	Glycyrrhetinate	1.1.1.146	0.60522	Active
10114	1467887698	Glycyrrhetinate	1.1.1.146	0.60522	Active
10114	1467887698	Glycyrrhetinate	1.1.1.-	0.60522	Active
10114	1467887698	Glycyrrhetinate	1.1.1.-	0.60522	Active
10114	1467887698	Glycyrrhetinate	1.1.1.-	0.60522	Active
10114	1467887698	Glycyrrhetinate	1.1.1.-	0.60522	Active
10114	1467887698	Glycyrrhetinate	1.1.1.-	0.60522	Active
9700	1467870132	dTMP	2.7.1.21	0.604839	Active
5870	1467871230	Estrone	1.1.1.62	0.60443	Active
5870	1467871230	Estrone	1.1.1.62	0.60443	Active
5870	1467871230	Estrone	1.1.1.62	0.60443	Active
5870	1467871230	Estrone	1.1.1.62	0.60443	Active
5870	1467871230	Estrone	1.1.1.62	0.60443	Active
5870	1467871230	Estrone	1.1.1.62	0.60443	Active
5870	1467871230	Estrone	1.1.1.62	0.60443	Active
5870	1467871230	Estrone	1.1.1.62	0.60443	Active
102030	1467907272	16alpha-Hydroxydehydroepiandrosterone	1.1.1.49	0.604307	Active
60961	1467868376	Adenosine	3.2.2.6	0.602139	Active
60961	1467868376	Adenosine	3.2.2.6	0.602139	Active
102030	1467907272	16alpha-Hydroxydehydroepiandrosterone	1.1.1.49	0.601648	Active
440624	1467908377	2-Methoxyestrone	1.1.1.62	0.600629	Active
540	1467880404	Cyanate	4.2.1.1	0.6	Active
540	1467880404	Cyanate	4.2.1.1	0.6	Active
540	1467880404	Cyanate	4.2.1.1	0.6	Active
540	1467880404	Cyanate	4.2.1.1	0.6	Active
540	1467880404	Cyanate	4.2.1.1	0.6	Active
540	1467880404	Cyanate	4.2.1.1	0.6	Active
540	1467880404	Cyanate	4.2.1.1	0.6	Active
540	1467880404	Cyanate	4.2.1.1	0.6	Active
540	1467880404	Cyanate	4.2.1.1	0.6	Active
540	1467880404	Cyanate	4.2.1.1	0.6	Active
540	1467880404	Cyanate	4.2.1.1	0.6	Active
540	1467880404	Cyanate	4.2.1.1	0.6	Active
540	1467880404	Cyanate	4.2.1.1	0.6	Active
540	1467880404	Cyanate	4.2.1.1	0.6	Active
540	1467880404	Cyanate	4.2.1.1	0.6	Active
540	1467880404	Cyanate	4.2.1.1	0.6	Active
540	1467880404	Cyanate	4.2.1.1	0.6	Active
540	1467880404	Cyanate	4.2.1.1	0.6	Active
65110	1467904765	1-(5'-Phosphoribosyl)-5-amino-4-imidazolecarboxamide	3.1.3.11	0.598592	Active
65110	1467904765	1-(5'-Phosphoribosyl)-5-amino-4-imidazolecarboxamide	3.1.3.11	0.598291	Active
1794427	1467875296	Chlorogenate	1.1.1.54	0.597523	Active
65110	1467904765	1-(5'-Phosphoribosyl)-5-amino-4-imidazolecarboxamide	3.1.3.11	0.597222	Active
73191	1467944944	Nodakenin	3.2.1.20	0.595533	Active
107758	1467879341	1D-myo-Inositol 1,3,4,5-tetrakisphosphate	2.7.1.127	0.593301	Active
65110	1467904765	1-(5'-Phosphoribosyl)-5-amino-4-imidazolecarboxamide	3.1.3.11	0.593103	Active
64945	1467941399	Ursolic acid	1.1.1.146	0.592972	Active
64945	1467941399	Ursolic acid	1.1.1.146	0.592972	Active
73191	1467944944	Nodakenin	3.2.1.20	0.587719	Active
65110	1467904765	1-(5'-Phosphoribosyl)-5-amino-4-imidazolecarboxamide	3.1.3.11	0.585034	Active
445154	1467896992	Resveratrol	1.14.13.39	0.583691	Active
5881	1467878934	Dehydroepiandrosterone	1.1.1.49	0.582003	Active
5881	1467878934	Dehydroepiandrosterone	1.1.1.49	0.582003	Active
5881	1467878934	Dehydroepiandrosterone	1.1.1.49	0.582003	Active
5881	1467878934	Dehydroepiandrosterone	1.1.1.49	0.582003	Active
9700	1467870132	dTMP	2.7.1.21	0.57971	Active
101771	1467984742	Allotetrahydrodeoxycorticosterone	1.1.1.49	0.579299	Active
9700	1467870132	dTMP	2.7.1.21	0.578947	Active
1794427	1467875296	Chlorogenate	1.1.1.54	0.578231	Active
97627	1467970974	9-Riburonosyladenine	3.3.1.1	0.578014	Active
97627	1467970974	9-Riburonosyladenine	3.3.1.1	0.578014	Active
97627	1467970974	9-Riburonosyladenine	3.3.1.1	0.578014	Active
65110	1467904765	1-(5'-Phosphoribosyl)-5-amino-4-imidazolecarboxamide	3.1.3.11	0.576923	Active
10114	1467887698	Glycyrrhetinate	1.1.1.-	0.574468	Active
10114	1467887698	Glycyrrhetinate	1.1.1.-	0.574468	Active
10114	1467887698	Glycyrrhetinate	1.1.1.-	0.574468	Active
10114	1467887698	Glycyrrhetinate	1.1.1.146	0.574468	Active
10114	1467887698	Glycyrrhetinate	1.1.1.146	0.574468	Active
10114	1467887698	Glycyrrhetinate	1.1.1.146	0.574468	Active
10114	1467887698	Glycyrrhetinate	1.1.1.146	0.574468	Active
10114	1467887698	Glycyrrhetinate	1.1.1.146	0.574468	Active
10114	1467887698	Glycyrrhetinate	1.1.1.146	0.574468	Active
10114	1467887698	Glycyrrhetinate	1.1.1.146	0.574468	Active
10114	1467887698	Glycyrrhetinate	1.1.1.146	0.574468	Active
10114	1467887698	Glycyrrhetinate	1.1.1.146	0.574468	Active
10114	1467887698	Glycyrrhetinate	1.1.1.146	0.574468	Active
10114	1467887698	Glycyrrhetinate	1.1.1.146	0.574468	Active
10114	1467887698	Glycyrrhetinate	1.1.1.146	0.574468	Active
10114	1467887698	Glycyrrhetinate	1.1.1.146	0.574468	Active
10114	1467887698	Glycyrrhetinate	1.1.1.-	0.574468	Active
10114	1467887698	Glycyrrhetinate	1.1.1.-	0.574468	Active
10114	1467887698	Glycyrrhetinate	1.1.1.-	0.574468	Active
10114	1467887698	Glycyrrhetinate	1.1.1.-	0.574468	Active
10114	1467887698	Glycyrrhetinate	1.1.1.146	0.574468	Active
10114	1467887698	Glycyrrhetinate	1.1.1.146	0.574468	Active
10114	1467887698	Glycyrrhetinate	1.1.1.146	0.574468	Active
10114	1467887698	Glycyrrhetinate	1.1.1.-	0.574468	Active
10114	1467887698	Glycyrrhetinate	1.1.1.-	0.573696	Active
10114	1467887698	Glycyrrhetinate	1.1.1.-	0.573696	Active
10114	1467887698	Glycyrrhetinate	1.1.1.-	0.573696	Active
10114	1467887698	Glycyrrhetinate	1.1.1.146	0.573696	Active
10114	1467887698	Glycyrrhetinate	1.1.1.146	0.573696	Active
10114	1467887698	Glycyrrhetinate	1.1.1.146	0.573696	Active
10114	1467887698	Glycyrrhetinate	1.1.1.146	0.573696	Active
10114	1467887698	Glycyrrhetinate	1.1.1.146	0.573696	Active
10114	1467887698	Glycyrrhetinate	1.1.1.146	0.573696	Active
10114	1467887698	Glycyrrhetinate	1.1.1.146	0.573696	Active
10114	1467887698	Glycyrrhetinate	1.1.1.146	0.573696	Active
10114	1467887698	Glycyrrhetinate	1.1.1.146	0.573696	Active
10114	1467887698	Glycyrrhetinate	1.1.1.146	0.573696	Active
10114	1467887698	Glycyrrhetinate	1.1.1.146	0.573696	Active
10114	1467887698	Glycyrrhetinate	1.1.1.146	0.573696	Active
10114	1467887698	Glycyrrhetinate	1.1.1.146	0.573696	Active
10114	1467887698	Glycyrrhetinate	1.1.1.-	0.573696	Active
10114	1467887698	Glycyrrhetinate	1.1.1.-	0.573696	Active
10114	1467887698	Glycyrrhetinate	1.1.1.-	0.573696	Active
10114	1467887698	Glycyrrhetinate	1.1.1.-	0.573696	Active
10114	1467887698	Glycyrrhetinate	1.1.1.146	0.573696	Active
10114	1467887698	Glycyrrhetinate	1.1.1.146	0.573696	Active
10114	1467887698	Glycyrrhetinate	1.1.1.146	0.573696	Active
10114	1467887698	Glycyrrhetinate	1.1.1.-	0.573696	Active
447278	5474187	2-[methyl-[(3E,7E)-4,8,12-trimethyltrideca-3,7,11-trienyl]amino]ethyl phosphono hydrogen phosphate	2.5.1.29	0.572327	Active
102030	1467907272	16alpha-Hydroxydehydroepiandrosterone	1.1.1.49	0.571603	Active
101771	1467984742	Allotetrahydrodeoxycorticosterone	1.1.1.49	0.571429	Active
461278	5599918	[(2S,5R)-5-(5-methyl-2,4-dioxo-1-pyrimidinyl)-2,5-dihydrofuran-2-yl]methyl dihydrogen phosphate	2.7.4.9	0.571429	Active
461278	5599918	[(2S,5R)-5-(5-methyl-2,4-dioxo-1-pyrimidinyl)-2,5-dihydrofuran-2-yl]methyl dihydrogen phosphate	2.7.4.9	0.571429	Active
461278	5599918	[(2S,5R)-5-(5-methyl-2,4-dioxo-1-pyrimidinyl)-2,5-dihydrofuran-2-yl]methyl dihydrogen phosphate	2.7.4.9	0.571429	Active
461278	5599918	[(2S,5R)-5-(5-methyl-2,4-dioxo-1-pyrimidinyl)-2,5-dihydrofuran-2-yl]methyl dihydrogen phosphate	2.7.4.9	0.571429	Active
461278	5599918	[(2S,5R)-5-(5-methyl-2,4-dioxo-1-pyrimidinyl)-2,5-dihydrofuran-2-yl]methyl dihydrogen phosphate	2.7.4.9	0.571429	Active
73191	1467944944	Nodakenin	3.2.1.20	0.568965	Active
73191	1467944944	Nodakenin	3.2.1.20	0.568915	Active
5870	1467871230	Estrone	1.1.1.62	0.568452	Active
5870	1467871230	Estrone	1.1.1.62	0.568452	Active
5870	1467871230	Estrone	1.1.1.62	0.568452	Active
5870	1467871230	Estrone	1.1.1.62	0.568452	Active
5870	1467871230	Estrone	1.1.1.62	0.568452	Active
5870	1467871230	Estrone	1.1.1.62	0.568452	Active
5870	1467871230	Estrone	1.1.1.62	0.568452	Active
5870	1467871230	Estrone	1.1.1.62	0.568452	Active
38853	1467924487	Methyldopa anhydrous	1.14.14.-	0.565934	Active
5881	1467878934	Dehydroepiandrosterone	1.1.1.49	0.565318	Active
5881	1467878934	Dehydroepiandrosterone	1.1.1.49	0.565318	Active
5881	1467878934	Dehydroepiandrosterone	1.1.1.49	0.565318	Active
5881	1467878934	Dehydroepiandrosterone	1.1.1.49	0.565318	Active
440624	1467908377	2-Methoxyestrone	1.1.1.62	0.565089	Active
65110	1467904765	1-(5'-Phosphoribosyl)-5-amino-4-imidazolecarboxamide	3.1.3.11	0.564103	Active
73191	1467944944	Nodakenin	3.2.1.20	0.562874	Active
5757	1467876271	Estradiol-17beta	1.1.1.62	0.5625	Active
5881	1467878934	Dehydroepiandrosterone	1.1.1.49	0.560839	Active
5881	1467878934	Dehydroepiandrosterone	1.1.1.49	0.560839	Active
5881	1467878934	Dehydroepiandrosterone	1.1.1.49	0.560839	Active
5881	1467878934	Dehydroepiandrosterone	1.1.1.49	0.560839	Active
164628	1467870119	dTDP	2.7.4.6	0.560606	Active
5881	1467878934	Dehydroepiandrosterone	1.1.1.49	0.560472	Active
5881	1467878934	Dehydroepiandrosterone	1.1.1.49	0.560472	Active
5881	1467878934	Dehydroepiandrosterone	1.1.1.49	0.560472	Active
5881	1467878934	Dehydroepiandrosterone	1.1.1.49	0.560472	Active
73191	1467944944	Nodakenin	3.2.1.20	0.560335	Active
10393	1467914452	4-Hydroxyphenylethanol	4.2.1.1	0.558442	Active
10393	1467914452	4-Hydroxyphenylethanol	4.2.1.1	0.558442	Active
10393	1467914452	4-Hydroxyphenylethanol	4.2.1.1	0.558442	Active
10393	1467914452	4-Hydroxyphenylethanol	4.2.1.1	0.558442	Active
10393	1467914452	4-Hydroxyphenylethanol	4.2.1.1	0.558442	Active
10393	1467914452	4-Hydroxyphenylethanol	4.2.1.1	0.558442	Active
10393	1467914452	4-Hydroxyphenylethanol	4.2.1.1	0.558442	Active
65110	1467904765	1-(5'-Phosphoribosyl)-5-amino-4-imidazolecarboxamide	3.1.3.11	0.558442	Active
73191	1467944944	Nodakenin	3.2.1.20	0.55716	Active
102030	1467907272	16alpha-Hydroxydehydroepiandrosterone	1.1.1.49	0.556039	Active
461278	5599918	[(2S,5R)-5-(5-methyl-2,4-dioxo-1-pyrimidinyl)-2,5-dihydrofuran-2-yl]methyl dihydrogen phosphate	2.7.4.9	0.555556	Active
461278	5599918	[(2S,5R)-5-(5-methyl-2,4-dioxo-1-pyrimidinyl)-2,5-dihydrofuran-2-yl]methyl dihydrogen phosphate	2.7.4.9	0.555556	Active
65049	1468013295	Spongothymidine	2.7.1.21	0.553191	Active
65049	1468013295	Spongothymidine	2.7.1.21	0.553191	Active
65049	1468013295	Spongothymidine	2.7.1.21	0.553191	Active
65049	1468013295	Spongothymidine	2.7.1.21	0.553191	Active
102030	1467907272	16alpha-Hydroxydehydroepiandrosterone	1.1.1.49	0.553103	Active
5879	1467871919	Androsterone	1.1.1.64	0.552846	Active
5879	1467871919	Androsterone	1.1.1.64	0.552846	Active
5879	1467871919	Androsterone	1.1.1.64	0.552846	Active
5879	1467871919	Androsterone	1.1.1.64	0.552846	Active
5879	1467871919	Androsterone	1.1.1.64	0.552846	Active
5881	1467878934	Dehydroepiandrosterone	1.1.1.49	0.552846	Active
5881	1467878934	Dehydroepiandrosterone	1.1.1.49	0.552846	Active
5881	1467878934	Dehydroepiandrosterone	1.1.1.49	0.552846	Active
5881	1467878934	Dehydroepiandrosterone	1.1.1.49	0.552846	Active
5881	1467878934	Dehydroepiandrosterone	1.1.1.49	0.552846	Active
5881	1467878934	Dehydroepiandrosterone	1.1.1.49	0.552846	Active
5881	1467878934	Dehydroepiandrosterone	1.1.1.49	0.552846	Active
5881	1467878934	Dehydroepiandrosterone	1.1.1.49	0.552846	Active
101771	1467984742	Allotetrahydrodeoxycorticosterone	1.1.1.49	0.551669	Active
73191	1467944944	Nodakenin	3.2.1.20	0.550459	Active
5881	1467878934	Dehydroepiandrosterone	1.1.1.49	0.550439	Active
5881	1467878934	Dehydroepiandrosterone	1.1.1.49	0.550439	Active
5881	1467878934	Dehydroepiandrosterone	1.1.1.49	0.550439	Active
5881	1467878934	Dehydroepiandrosterone	1.1.1.49	0.550439	Active
73191	1467944944	Nodakenin	3.2.1.20	0.548831	Active
73191	1467944944	Nodakenin	3.2.1.20	0.548387	Active
101771	1467984742	Allotetrahydrodeoxycorticosterone	1.1.1.49	0.548183	Active
10114	1467887698	Glycyrrhetinate	1.1.1.-	0.548057	Active
10114	1467887698	Glycyrrhetinate	1.1.1.-	0.548057	Active
10114	1467887698	Glycyrrhetinate	1.1.1.-	0.548057	Active
10114	1467887698	Glycyrrhetinate	1.1.1.146	0.548057	Active
10114	1467887698	Glycyrrhetinate	1.1.1.146	0.548057	Active
10114	1467887698	Glycyrrhetinate	1.1.1.146	0.548057	Active
10114	1467887698	Glycyrrhetinate	1.1.1.146	0.548057	Active
10114	1467887698	Glycyrrhetinate	1.1.1.146	0.548057	Active
10114	1467887698	Glycyrrhetinate	1.1.1.146	0.548057	Active
10114	1467887698	Glycyrrhetinate	1.1.1.146	0.548057	Active
10114	1467887698	Glycyrrhetinate	1.1.1.146	0.548057	Active
10114	1467887698	Glycyrrhetinate	1.1.1.146	0.548057	Active
10114	1467887698	Glycyrrhetinate	1.1.1.146	0.548057	Active
10114	1467887698	Glycyrrhetinate	1.1.1.146	0.548057	Active
10114	1467887698	Glycyrrhetinate	1.1.1.146	0.548057	Active
10114	1467887698	Glycyrrhetinate	1.1.1.146	0.548057	Active
10114	1467887698	Glycyrrhetinate	1.1.1.-	0.548057	Active
10114	1467887698	Glycyrrhetinate	1.1.1.-	0.548057	Active
10114	1467887698	Glycyrrhetinate	1.1.1.-	0.548057	Active
10114	1467887698	Glycyrrhetinate	1.1.1.-	0.548057	Active
10114	1467887698	Glycyrrhetinate	1.1.1.146	0.548057	Active
10114	1467887698	Glycyrrhetinate	1.1.1.146	0.548057	Active
10114	1467887698	Glycyrrhetinate	1.1.1.146	0.548057	Active
10114	1467887698	Glycyrrhetinate	1.1.1.-	0.548057	Active
64945	1467941399	Ursolic acid	1.1.1.146	0.547718	Active
64945	1467941399	Ursolic acid	1.1.1.146	0.547718	Active
5870	1467871230	Estrone	1.1.1.62	0.547278	Active
5870	1467871230	Estrone	1.1.1.62	0.547278	Active
5870	1467871230	Estrone	1.1.1.62	0.547278	Active
5870	1467871230	Estrone	1.1.1.62	0.547278	Active
5870	1467871230	Estrone	1.1.1.62	0.547278	Active
5870	1467871230	Estrone	1.1.1.62	0.547278	Active
5870	1467871230	Estrone	1.1.1.62	0.547278	Active
5870	1467871230	Estrone	1.1.1.62	0.547278	Active
102030	1467907272	16alpha-Hydroxydehydroepiandrosterone	1.1.1.49	0.546219	Active
291270	3986149	N6-[(3,4,5-trimethoxyphenyl)methyl]quinazoline-2,4,6-triamine	2.1.1.45	0.546154	Active
5870	1467871230	Estrone	1.1.1.62	0.546142	Active
5870	1467871230	Estrone	1.1.1.62	0.546142	Active
5870	1467871230	Estrone	1.1.1.62	0.546142	Active
5870	1467871230	Estrone	1.1.1.62	0.546142	Active
5870	1467871230	Estrone	1.1.1.62	0.546142	Active
5870	1467871230	Estrone	1.1.1.62	0.546142	Active
5870	1467871230	Estrone	1.1.1.62	0.546142	Active
5870	1467871230	Estrone	1.1.1.62	0.546142	Active
64968	1467871146	dTTP	2.7.1.21	0.546053	Active
73191	1467944944	Nodakenin	3.2.1.20	0.545779	Active
8609	89857	phenyl 4-amino-2-hydroxy-benzoate	3.5.1.98	0.545455	Active
440624	1467908377	2-Methoxyestrone	1.1.1.62	0.54416	Active
9700	1467870132	dTMP	2.7.1.21	0.543478	Active
440624	1467908377	2-Methoxyestrone	1.1.1.62	0.542857	Active
5879	1467871919	Androsterone	1.1.1.64	0.541985	Active
5879	1467871919	Androsterone	1.1.1.64	0.541985	Active
5879	1467871919	Androsterone	1.1.1.64	0.541985	Active
65110	1467904765	1-(5'-Phosphoribosyl)-5-amino-4-imidazolecarboxamide	3.1.3.11	0.540984	Active
101771	1467984742	Allotetrahydrodeoxycorticosterone	1.1.1.49	0.540881	Active
5881	1467878934	Dehydroepiandrosterone	1.1.1.49	0.53914	Active
5881	1467878934	Dehydroepiandrosterone	1.1.1.49	0.53914	Active
5881	1467878934	Dehydroepiandrosterone	1.1.1.49	0.53914	Active
5881	1467878934	Dehydroepiandrosterone	1.1.1.49	0.53914	Active
1195	1467867268	Isopentenyl diphosphate	2.7.1.36	0.539007	Active
5757	1467876271	Estradiol-17beta	1.1.1.62	0.538854	Active
12921	1467933839	Sterculic acid	1.14.19.1	0.537234	Active
12921	1467933839	Sterculic acid	1.14.19.1	0.537234	Active
439418	1467878092	(R)-5-Diphosphomevalonate	2.7.4.2	0.537037	Active
4788	1467874409	Phloretin	1.1.1.141	0.535248	Active
4788	1467874409	Phloretin	1.1.1.141	0.535248	Active
5879	1467871919	Androsterone	1.1.1.64	0.534943	Active
461278	5599918	[(2S,5R)-5-(5-methyl-2,4-dioxo-1-pyrimidinyl)-2,5-dihydrofuran-2-yl]methyl dihydrogen phosphate	2.7.4.9	0.533333	Active
461278	5599918	[(2S,5R)-5-(5-methyl-2,4-dioxo-1-pyrimidinyl)-2,5-dihydrofuran-2-yl]methyl dihydrogen phosphate	2.7.4.9	0.533333	Active
65110	1467904765	1-(5'-Phosphoribosyl)-5-amino-4-imidazolecarboxamide	3.1.3.11	0.532258	Active
188323	1468022339	7-Methylcapillarisin	1.14.13.39	0.530201	Active
5054	1467883226	Resorcinol	1.14.99.1	0.528796	Active
5054	1467883226	Resorcinol	1.14.99.1	0.528796	Active
73191	1467944944	Nodakenin	3.2.1.20	0.528492	Active
73191	1467944944	Nodakenin	3.2.1.20	0.52822	Active
5879	1467871919	Androsterone	1.1.1.64	0.528	Active
439742	1467889381	3-Cyano-L-alanine	4.4.1.1	0.526316	Active
73191	1467944944	Nodakenin	3.2.1.20	0.526237	Active
41774	1467921414	Acarbose	3.2.1.1	0.526111	Active
41774	1467921414	Acarbose	3.2.1.20	0.526111	Active
41774	1467921414	Acarbose	3.2.1.20	0.526111	Active
41774	1467921414	Acarbose	3.2.1.1	0.526111	Active
41774	1467921414	Acarbose	3.2.1.1	0.526111	Active
41774	1467921414	Acarbose	3.2.1.20	0.526111	Active
41774	1467921414	Acarbose	3.2.1.1	0.526111	Active
41774	1467921414	Acarbose	3.2.1.1	0.526111	Active
41774	1467921414	Acarbose	3.2.1.1	0.526111	Active
41774	1467921414	Acarbose	3.2.1.1	0.526111	Active
41774	1467921414	Acarbose	3.2.1.20	0.526111	Active
41774	1467921414	Acarbose	3.2.1.1	0.526111	Active
5879	1467871919	Androsterone	1.1.1.64	0.52568	Active
1662	1467898309	3-Hydroxy-3-methylglutarate	1.1.1.34	0.525	Active
1662	1467898309	3-Hydroxy-3-methylglutarate	1.1.1.34	0.525	Active
10114	1467887698	Glycyrrhetinate	1.1.1.-	0.524403	Active
10114	1467887698	Glycyrrhetinate	1.1.1.-	0.524403	Active
10114	1467887698	Glycyrrhetinate	1.1.1.-	0.524403	Active
10114	1467887698	Glycyrrhetinate	1.1.1.146	0.524403	Active
10114	1467887698	Glycyrrhetinate	1.1.1.146	0.524403	Active
10114	1467887698	Glycyrrhetinate	1.1.1.146	0.524403	Active
10114	1467887698	Glycyrrhetinate	1.1.1.146	0.524403	Active
10114	1467887698	Glycyrrhetinate	1.1.1.146	0.524403	Active
10114	1467887698	Glycyrrhetinate	1.1.1.146	0.524403	Active
10114	1467887698	Glycyrrhetinate	1.1.1.146	0.524403	Active
10114	1467887698	Glycyrrhetinate	1.1.1.146	0.524403	Active
10114	1467887698	Glycyrrhetinate	1.1.1.146	0.524403	Active
10114	1467887698	Glycyrrhetinate	1.1.1.146	0.524403	Active
10114	1467887698	Glycyrrhetinate	1.1.1.146	0.524403	Active
10114	1467887698	Glycyrrhetinate	1.1.1.146	0.524403	Active
10114	1467887698	Glycyrrhetinate	1.1.1.146	0.524403	Active
10114	1467887698	Glycyrrhetinate	1.1.1.-	0.524403	Active
10114	1467887698	Glycyrrhetinate	1.1.1.-	0.524403	Active
10114	1467887698	Glycyrrhetinate	1.1.1.-	0.524403	Active
10114	1467887698	Glycyrrhetinate	1.1.1.-	0.524403	Active
10114	1467887698	Glycyrrhetinate	1.1.1.146	0.524403	Active
10114	1467887698	Glycyrrhetinate	1.1.1.146	0.524403	Active
10114	1467887698	Glycyrrhetinate	1.1.1.146	0.524403	Active
10114	1467887698	Glycyrrhetinate	1.1.1.-	0.524403	Active
5879	1467871919	Androsterone	1.1.1.64	0.524372	Active
5879	1467871919	Androsterone	1.1.1.64	0.524372	Active
5879	1467871919	Androsterone	1.1.1.64	0.524372	Active
5757	1467876271	Estradiol-17beta	1.1.1.62	0.524257	Active
5757	1467876271	Estradiol-17beta	1.1.1.62	0.524257	Active
5757	1467876271	Estradiol-17beta	1.1.1.62	0.524257	Active
5757	1467876271	Estradiol-17beta	1.1.1.62	0.524257	Active
5757	1467876271	Estradiol-17beta	1.1.1.62	0.524257	Active
5870	1467871230	Estrone	1.1.1.62	0.524257	Active
5870	1467871230	Estrone	1.1.1.62	0.524257	Active
5870	1467871230	Estrone	1.1.1.62	0.524257	Active
5870	1467871230	Estrone	1.1.1.62	0.524257	Active
5870	1467871230	Estrone	1.1.1.62	0.524257	Active
5870	1467871230	Estrone	1.1.1.62	0.524257	Active
5870	1467871230	Estrone	1.1.1.62	0.524257	Active
5870	1467871230	Estrone	1.1.1.62	0.524257	Active
5870	1467871230	Estrone	1.1.1.62	0.524257	Active
5870	1467871230	Estrone	1.1.1.62	0.524257	Active
5870	1467871230	Estrone	1.1.1.62	0.524257	Active
5870	1467871230	Estrone	1.1.1.62	0.524257	Active
5870	1467871230	Estrone	1.1.1.62	0.524257	Active
5870	1467871230	Estrone	1.1.1.62	0.524257	Active
5870	1467871230	Estrone	1.1.1.62	0.524257	Active
5870	1467871230	Estrone	1.1.1.62	0.524257	Active
5870	1467871230	Estrone	1.1.1.62	0.524257	Active
5870	1467871230	Estrone	1.1.1.62	0.524257	Active
5870	1467871230	Estrone	1.1.1.62	0.524257	Active
5870	1467871230	Estrone	1.1.1.62	0.524257	Active
5870	1467871230	Estrone	1.1.1.62	0.524257	Active
5870	1467871230	Estrone	1.1.1.62	0.524257	Active
5870	1467871230	Estrone	1.1.1.62	0.524257	Active
5870	1467871230	Estrone	1.1.1.62	0.524257	Active
5879	1467871919	Androsterone	1.1.1.64	0.524257	Active
65049	1468013295	Spongothymidine	2.7.1.21	0.522659	Active
65049	1468013295	Spongothymidine	2.7.1.21	0.522659	Active
65049	1468013295	Spongothymidine	2.7.1.21	0.522659	Active
65049	1468013295	Spongothymidine	2.7.1.21	0.522659	Active
164628	1467870119	dTDP	2.7.4.6	0.521739	Active
65049	1468013295	Spongothymidine	2.7.1.21	0.521595	Active
65049	1468013295	Spongothymidine	2.7.1.21	0.521595	Active
65049	1468013295	Spongothymidine	2.7.1.21	0.521595	Active
65049	1468013295	Spongothymidine	2.7.1.21	0.521595	Active
73191	1467944944	Nodakenin	3.2.1.20	0.521226	Active
17513	1467904648	Acadesine	3.1.3.48	0.521186	Active
440624	1467908377	2-Methoxyestrone	1.1.1.62	0.520995	Active
440624	1467908377	2-Methoxyestrone	1.1.1.62	0.520995	Active
440624	1467908377	2-Methoxyestrone	1.1.1.62	0.520995	Active
785	1467871989	Hydroquinone	1.1.1.141	0.520833	Active
785	1467871989	Hydroquinone	1.1.1.141	0.520833	Active
785	1467871989	Hydroquinone	1.1.1.141	0.520833	Active
73191	1467944944	Nodakenin	3.2.1.20	0.51921	Active
461278	5599918	[(2S,5R)-5-(5-methyl-2,4-dioxo-1-pyrimidinyl)-2,5-dihydrofuran-2-yl]methyl dihydrogen phosphate	2.7.4.9	0.518868	Active
461278	5599918	[(2S,5R)-5-(5-methyl-2,4-dioxo-1-pyrimidinyl)-2,5-dihydrofuran-2-yl]methyl dihydrogen phosphate	2.7.4.9	0.518868	Active
461278	5599918	[(2S,5R)-5-(5-methyl-2,4-dioxo-1-pyrimidinyl)-2,5-dihydrofuran-2-yl]methyl dihydrogen phosphate	2.7.4.9	0.518868	Active
1057	1467877751	1,2,3-Trihydroxybenzene	1.1.1.141	0.518519	Active
5879	1467871919	Androsterone	1.1.1.64	0.518248	Active
5879	1467871919	Androsterone	1.1.1.64	0.518248	Active
9700	1467870132	dTMP	2.7.1.21	0.517857	Active
5870	1467871230	Estrone	1.1.1.62	0.517341	Active
5870	1467871230	Estrone	1.1.1.62	0.517341	Active
5870	1467871230	Estrone	1.1.1.62	0.517341	Active
5870	1467871230	Estrone	1.1.1.62	0.517341	Active
5870	1467871230	Estrone	1.1.1.62	0.517341	Active
5870	1467871230	Estrone	1.1.1.62	0.517341	Active
5870	1467871230	Estrone	1.1.1.62	0.517341	Active
5870	1467871230	Estrone	1.1.1.62	0.517341	Active
439418	1467878092	(R)-5-Diphosphomevalonate	2.7.4.2	0.516949	Active
5870	1467871230	Estrone	1.1.1.62	0.516686	Active
5870	1467871230	Estrone	1.1.1.62	0.516686	Active
5870	1467871230	Estrone	1.1.1.62	0.516686	Active
5870	1467871230	Estrone	1.1.1.62	0.516686	Active
5870	1467871230	Estrone	1.1.1.62	0.516686	Active
5870	1467871230	Estrone	1.1.1.62	0.516686	Active
5870	1467871230	Estrone	1.1.1.62	0.516686	Active
5870	1467871230	Estrone	1.1.1.62	0.516686	Active
440624	1467908377	2-Methoxyestrone	1.1.1.62	0.514368	Active
440624	1467908377	2-Methoxyestrone	1.1.1.62	0.514318	Active
5054	1467883226	Resorcinol	1.14.99.1	0.512953	Active
5054	1467883226	Resorcinol	1.14.99.1	0.512953	Active
5757	1467876271	Estradiol-17beta	1.1.1.62	0.510881	Active
65049	1468013295	Spongothymidine	2.7.1.21	0.510703	Active
65049	1468013295	Spongothymidine	2.7.1.21	0.510703	Active
65049	1468013295	Spongothymidine	2.7.1.21	0.510703	Active
65049	1468013295	Spongothymidine	2.7.1.21	0.510703	Active
102030	1467907272	16alpha-Hydroxydehydroepiandrosterone	1.1.1.49	0.508097	Active
65407	1468045418	NBMPR	2.7.1.20	0.507599	Active
65407	1468045418	NBMPR	2.7.1.20	0.507599	Active
65407	1468045418	NBMPR	2.7.1.20	0.507599	Active
65407	1468045418	NBMPR	2.7.1.20	0.507599	Active
5870	1467871230	Estrone	1.1.1.62	0.506808	Active
5870	1467871230	Estrone	1.1.1.62	0.506808	Active
5870	1467871230	Estrone	1.1.1.62	0.506808	Active
5870	1467871230	Estrone	1.1.1.62	0.506808	Active
5870	1467871230	Estrone	1.1.1.62	0.506808	Active
5870	1467871230	Estrone	1.1.1.62	0.506808	Active
5870	1467871230	Estrone	1.1.1.62	0.506808	Active
5870	1467871230	Estrone	1.1.1.62	0.506808	Active
5870	1467871230	Estrone	1.1.1.62	0.506808	Active
5870	1467871230	Estrone	1.1.1.62	0.506808	Active
5870	1467871230	Estrone	1.1.1.62	0.506808	Active
5870	1467871230	Estrone	1.1.1.62	0.506808	Active
5870	1467871230	Estrone	1.1.1.62	0.506808	Active
5870	1467871230	Estrone	1.1.1.62	0.506808	Active
5870	1467871230	Estrone	1.1.1.62	0.506808	Active
5870	1467871230	Estrone	1.1.1.62	0.506808	Active
5870	1467871230	Estrone	1.1.1.62	0.506808	Active
5870	1467871230	Estrone	1.1.1.62	0.506808	Active
5870	1467871230	Estrone	1.1.1.62	0.506808	Active
5870	1467871230	Estrone	1.1.1.62	0.506808	Active
5870	1467871230	Estrone	1.1.1.62	0.506808	Active
5870	1467871230	Estrone	1.1.1.62	0.506808	Active
5870	1467871230	Estrone	1.1.1.62	0.506808	Active
5870	1467871230	Estrone	1.1.1.62	0.506808	Active
31244	1467963254	p-Anisaldehyde	1.14.13.-	0.50625	Active
5881	1467878934	Dehydroepiandrosterone	1.1.1.49	0.505216	Active
5881	1467878934	Dehydroepiandrosterone	1.1.1.49	0.505216	Active
5881	1467878934	Dehydroepiandrosterone	1.1.1.49	0.505216	Active
5881	1467878934	Dehydroepiandrosterone	1.1.1.49	0.505216	Active
5881	1467878934	Dehydroepiandrosterone	1.1.1.49	0.505216	Active
5881	1467878934	Dehydroepiandrosterone	1.1.1.49	0.505216	Active
5881	1467878934	Dehydroepiandrosterone	1.1.1.49	0.505216	Active
5881	1467878934	Dehydroepiandrosterone	1.1.1.49	0.505216	Active
5881	1467878934	Dehydroepiandrosterone	1.1.1.49	0.505216	Active
5881	1467878934	Dehydroepiandrosterone	1.1.1.49	0.505216	Active
5881	1467878934	Dehydroepiandrosterone	1.1.1.49	0.505216	Active
5881	1467878934	Dehydroepiandrosterone	1.1.1.49	0.505216	Active
447278	5474187	2-[methyl-[(3E,7E)-4,8,12-trimethyltrideca-3,7,11-trienyl]amino]ethyl phosphono hydrogen phosphate	2.5.1.29	0.504274	Active
102030	1467907272	16alpha-Hydroxydehydroepiandrosterone	1.1.1.49	0.503979	Active
440624	1467908377	2-Methoxyestrone	1.1.1.62	0.503759	Active
440624	1467908377	2-Methoxyestrone	1.1.1.62	0.503759	Active
440624	1467908377	2-Methoxyestrone	1.1.1.62	0.503759	Active
73571	1467951695	Sakuranetin	1.14.13.39	0.503608	Active
291270	3986149	N6-[(3,4,5-trimethoxyphenyl)methyl]quinazoline-2,4,6-triamine	2.1.1.45	0.503546	Active
64945	1467941399	Ursolic acid	1.1.1.146	0.503119	Active
64945	1467941399	Ursolic acid	1.1.1.146	0.503119	Active
73191	1467944944	Nodakenin	1.1.1.133	0.502513	Active
73191	1467944944	Nodakenin	3.2.1.20	0.502158	Active
5870	1467871230	Estrone	1.1.1.62	0.500747	Active
5870	1467871230	Estrone	1.1.1.62	0.500747	Active
5870	1467871230	Estrone	1.1.1.62	0.500747	Active
5870	1467871230	Estrone	1.1.1.62	0.500747	Active
5870	1467871230	Estrone	1.1.1.62	0.500747	Active
5870	1467871230	Estrone	1.1.1.62	0.500747	Active
5870	1467871230	Estrone	1.1.1.62	0.500747	Active
5870	1467871230	Estrone	1.1.1.62	0.500747	Active
5870	1467871230	Estrone	1.1.1.62	0.500747	Active
5870	1467871230	Estrone	1.1.1.62	0.500747	Active
5870	1467871230	Estrone	1.1.1.62	0.500747	Active
5870	1467871230	Estrone	1.1.1.62	0.500747	Active
5870	1467871230	Estrone	1.1.1.62	0.500747	Active
5870	1467871230	Estrone	1.1.1.62	0.500747	Active
5870	1467871230	Estrone	1.1.1.62	0.500747	Active
5870	1467871230	Estrone	1.1.1.62	0.500747	Active
1662	1467898309	3-Hydroxy-3-methylglutarate	1.1.1.34	0.5	Active
1662	1467898309	3-Hydroxy-3-methylglutarate	1.1.1.34	0.5	Active
68289	1467964124	Sesamol	1.14.13.39	0.5	Active
73191	1467944944	Nodakenin	3.2.1.20	0.5	Active
229818	3366876	4-(4-chlorophenyl)sulfonylaniline	3.1.1.47	0.5	Active
229818	3366876	4-(4-chlorophenyl)sulfonylaniline	3.1.1.47	0.5	Active
439182	1467907679	5'-Deoxyadenosine	2.4.2.28	0.5	Active
444795	1467874429	Retinoate	4.1.1.17	0.5	Active
445713	1467871046	trans,trans-Farnesyl diphosphate	2.5.1.58	0.5	Active
445713	1467871046	trans,trans-Farnesyl diphosphate	2.5.1.59	0.5	Active
445713	1467871046	trans,trans-Farnesyl diphosphate	2.5.1.29	0.5	Active
445713	1467871046	trans,trans-Farnesyl diphosphate	2.5.1.21	0.5	Active
445995	1467869865	Geranyl diphosphate	2.5.1.10	0.5	Active
445995	1467869865	Geranyl diphosphate	2.5.1.21	0.5	Active
447277	1467870003	Geranylgeranyl diphosphate	2.5.1.29	0.5	Active
447278	5474187	2-[methyl-[(3E,7E)-4,8,12-trimethyltrideca-3,7,11-trienyl]amino]ethyl phosphono hydrogen phosphate	2.5.1.29	0.5	Active
447278	5474187	2-[methyl-[(3E,7E)-4,8,12-trimethyltrideca-3,7,11-trienyl]amino]ethyl phosphono hydrogen phosphate	2.5.1.29	0.5	Active
440624	1467908377	2-Methoxyestrone	1.1.1.62	0.497771	Active
440624	1467908377	2-Methoxyestrone	1.1.1.62	0.497771	Active
1662	1467898309	3-Hydroxy-3-methylglutarate	1.1.1.34	0.497143	Active
1662	1467898309	3-Hydroxy-3-methylglutarate	1.1.1.34	0.497143	Active
5881	1467878934	Dehydroepiandrosterone	1.1.1.49	0.496902	Active
5881	1467878934	Dehydroepiandrosterone	1.1.1.49	0.496902	Active
5881	1467878934	Dehydroepiandrosterone	1.1.1.49	0.496902	Active
5881	1467878934	Dehydroepiandrosterone	1.1.1.49	0.496902	Active
243	1467867945	Benzoate	1.14.18.1	0.496774	Active
1662	1467898309	3-Hydroxy-3-methylglutarate	1.1.1.34	0.496774	Active
1662	1467898309	3-Hydroxy-3-methylglutarate	1.1.1.34	0.496774	Active
5757	1467876271	Estradiol-17beta	1.1.1.62	0.4962	Active
5870	1467871230	Estrone	1.1.1.62	0.4962	Active
5870	1467871230	Estrone	1.1.1.62	0.4962	Active
5870	1467871230	Estrone	1.1.1.62	0.4962	Active
5870	1467871230	Estrone	1.1.1.62	0.4962	Active
5870	1467871230	Estrone	1.1.1.62	0.4962	Active
5870	1467871230	Estrone	1.1.1.62	0.4962	Active
5870	1467871230	Estrone	1.1.1.62	0.4962	Active
5870	1467871230	Estrone	1.1.1.62	0.4962	Active
73571	1467951695	Sakuranetin	1.14.13.39	0.496164	Active
440624	1467908377	2-Methoxyestrone	1.1.1.62	0.494054	Active
5870	1467871230	Estrone	1.1.1.62	0.492865	Active
5870	1467871230	Estrone	1.1.1.62	0.492865	Active
5870	1467871230	Estrone	1.1.1.62	0.492865	Active
5870	1467871230	Estrone	1.1.1.62	0.492865	Active
5870	1467871230	Estrone	1.1.1.62	0.492865	Active
5870	1467871230	Estrone	1.1.1.62	0.492865	Active
5870	1467871230	Estrone	1.1.1.62	0.492865	Active
5870	1467871230	Estrone	1.1.1.62	0.492865	Active
6857	71394	2-[(3-butyl-1-isoquinolyl)oxy]-N,N-dimethyl-ethanamine	1.14.14.-	0.492754	Active
6857	71394	2-[(3-butyl-1-isoquinolyl)oxy]-N,N-dimethyl-ethanamine	1.14.14.-	0.492754	Active
6857	71394	2-[(3-butyl-1-isoquinolyl)oxy]-N,N-dimethyl-ethanamine	1.14.14.-	0.492754	Active
6857	71394	2-[(3-butyl-1-isoquinolyl)oxy]-N,N-dimethyl-ethanamine	1.14.14.-	0.492754	Active
65049	1468013295	Spongothymidine	2.7.1.21	0.491857	Active
65049	1468013295	Spongothymidine	2.7.1.21	0.491857	Active
65049	1468013295	Spongothymidine	2.7.1.21	0.491857	Active
65049	1468013295	Spongothymidine	2.7.1.21	0.491857	Active
73191	1467944944	Nodakenin	1.1.1.133	0.490909	Active
440624	1467908377	2-Methoxyestrone	1.1.1.62	0.49071	Active
5881	1467878934	Dehydroepiandrosterone	1.1.1.49	0.489177	Active
5881	1467878934	Dehydroepiandrosterone	1.1.1.49	0.489177	Active
5881	1467878934	Dehydroepiandrosterone	1.1.1.49	0.489177	Active
5881	1467878934	Dehydroepiandrosterone	1.1.1.49	0.489177	Active
5881	1467878934	Dehydroepiandrosterone	1.1.1.49	0.489177	Active
5881	1467878934	Dehydroepiandrosterone	1.1.1.49	0.489177	Active
5881	1467878934	Dehydroepiandrosterone	1.1.1.49	0.489177	Active
5881	1467878934	Dehydroepiandrosterone	1.1.1.49	0.489177	Active
5881	1467878934	Dehydroepiandrosterone	1.1.1.49	0.489177	Active
5881	1467878934	Dehydroepiandrosterone	1.1.1.49	0.489177	Active
5881	1467878934	Dehydroepiandrosterone	1.1.1.49	0.489177	Active
5881	1467878934	Dehydroepiandrosterone	1.1.1.49	0.489177	Active
165381	1467915849	P1,P3-Bis(5'-adenosyl) triphosphate	3.6.1.29	0.488934	Active
867	1467870335	Malonate	1.1.1.40	0.488889	Active
867	1467870335	Malonate	1.1.1.40	0.488889	Active
65110	1467904765	1-(5'-Phosphoribosyl)-5-amino-4-imidazolecarboxamide	3.1.3.11	0.488889	Active
65407	1468045418	NBMPR	2.7.1.20	0.488304	Active
65407	1468045418	NBMPR	2.7.1.20	0.488304	Active
65407	1468045418	NBMPR	2.7.1.20	0.488304	Active
65407	1468045418	NBMPR	2.7.1.20	0.488304	Active
5881	1467878934	Dehydroepiandrosterone	1.1.1.49	0.487671	Active
5881	1467878934	Dehydroepiandrosterone	1.1.1.49	0.487671	Active
5881	1467878934	Dehydroepiandrosterone	1.1.1.49	0.487671	Active
5881	1467878934	Dehydroepiandrosterone	1.1.1.49	0.487671	Active
85875	1994733	1-(2,5-dimethoxy-4-methylphenyl)-2-propanamine	1.4.3.4	0.4875	Active
441350	1467930454	Metyrosine	1.14.14.53	0.486667	Active
441350	1467930454	Metyrosine	1.14.14.-	0.486667	Active
441350	1467930454	Metyrosine	1.14.14.75	0.486667	Active
441350	1467930454	Metyrosine	1.14.14.73	0.486667	Active
439418	1467878092	(R)-5-Diphosphomevalonate	2.7.4.2	0.484127	Active
439418	1467878092	(R)-5-Diphosphomevalonate	2.7.4.2	0.484127	Active
439418	1467878092	(R)-5-Diphosphomevalonate	2.7.4.2	0.484127	Active
638278	1467937279	Isoliquiritigenin	1.13.11.34	0.483871	Active
5881	1467878934	Dehydroepiandrosterone	1.1.1.49	0.483595	Active
5881	1467878934	Dehydroepiandrosterone	1.1.1.49	0.483595	Active
5881	1467878934	Dehydroepiandrosterone	1.1.1.49	0.483595	Active
5881	1467878934	Dehydroepiandrosterone	1.1.1.49	0.483595	Active
5881	1467878934	Dehydroepiandrosterone	1.1.1.49	0.483595	Active
5881	1467878934	Dehydroepiandrosterone	1.1.1.49	0.483595	Active
5881	1467878934	Dehydroepiandrosterone	1.1.1.49	0.483595	Active
5881	1467878934	Dehydroepiandrosterone	1.1.1.49	0.483595	Active
5870	1467871230	Estrone	1.1.1.62	0.483544	Active
5870	1467871230	Estrone	1.1.1.62	0.483544	Active
5870	1467871230	Estrone	1.1.1.62	0.483544	Active
5870	1467871230	Estrone	1.1.1.62	0.483544	Active
5870	1467871230	Estrone	1.1.1.62	0.483544	Active
5870	1467871230	Estrone	1.1.1.62	0.483544	Active
5870	1467871230	Estrone	1.1.1.62	0.483544	Active
5870	1467871230	Estrone	1.1.1.62	0.483544	Active
440624	1467908377	2-Methoxyestrone	1.1.1.62	0.481108	Active
73191	1467944944	Nodakenin	3.2.1.20	0.478735	Active
188323	1468022339	7-Methylcapillarisin	1.14.13.39	0.47782	Active
65110	1467904765	1-(5'-Phosphoribosyl)-5-amino-4-imidazolecarboxamide	3.1.3.11	0.474453	Active
440210	1467900317	Bis(5'-adenosyl) pentaphosphate	3.6.1.52	0.470533	Active
440210	1467900317	Bis(5'-adenosyl) pentaphosphate	3.6.1.60	0.470533	Active
440210	1467900317	Bis(5'-adenosyl) pentaphosphate	3.6.1.52	0.470533	Active
119339	1467908789	Allosamidine	3.2.1.14	0.468966	Active
119339	1467908789	Allosamidine	3.2.1.14	0.468966	Active
119339	1467908789	Allosamidine	3.2.1.14	0.468966	Active
73571	1467951695	Sakuranetin	1.14.13.39	0.467869	Active
10207	1467957504	Aloe-emodin	1.2.1.3	0.467742	Active
10207	1467957504	Aloe-emodin	1.2.1.3	0.467742	Active
25447	1467882492	Coformycin	3.5.4.4	0.467337	Active
25447	1467882492	Coformycin	3.5.4.4	0.467337	Active
25447	1467882492	Coformycin	3.5.4.4	0.467337	Active
25447	1467882492	Coformycin	3.5.4.4	0.467337	Active
25447	1467882492	Coformycin	3.5.4.6	0.467337	Active
101771	1467984742	Allotetrahydrodeoxycorticosterone	1.1.1.49	0.467305	Active
73191	1467944944	Nodakenin	3.2.1.20	0.466093	Active
21632	1468001709	U 0521	1.14.16.2	0.465181	Active
73191	1467944944	Nodakenin	3.2.1.20	0.464817	Active
3100	1467922751	Diphenhydramine	1.14.14.-	0.464789	Active
3100	1467922751	Diphenhydramine	1.14.14.-	0.464789	Active
3100	1467922751	Diphenhydramine	1.14.14.-	0.464789	Active
3100	1467922751	Diphenhydramine	1.14.14.-	0.464789	Active
3100	1467922751	Diphenhydramine	1.14.14.-	0.464789	Active
102030	1467907272	16alpha-Hydroxydehydroepiandrosterone	1.1.1.49	0.464567	Active
102030	1467907272	16alpha-Hydroxydehydroepiandrosterone	1.1.1.49	0.464567	Active
41774	1467921414	Acarbose	3.2.1.1	0.46411	Active
41774	1467921414	Acarbose	3.2.1.20	0.46411	Active
41774	1467921414	Acarbose	3.2.1.20	0.46411	Active
41774	1467921414	Acarbose	3.2.1.1	0.46411	Active
41774	1467921414	Acarbose	3.2.1.1	0.46411	Active
41774	1467921414	Acarbose	3.2.1.20	0.46411	Active
41774	1467921414	Acarbose	3.2.1.1	0.46411	Active
41774	1467921414	Acarbose	3.2.1.1	0.46411	Active
41774	1467921414	Acarbose	3.2.1.1	0.46411	Active
41774	1467921414	Acarbose	3.2.1.1	0.46411	Active
41774	1467921414	Acarbose	3.2.1.20	0.46411	Active
41774	1467921414	Acarbose	3.2.1.1	0.46411	Active
66535	1467912563	3'-CMP	4.6.1.18	0.461818	Active
66535	1467912563	3'-CMP	4.6.1.18	0.461818	Active
66535	1467912563	3'-CMP	4.6.1.18	0.461818	Active
102030	1467907272	16alpha-Hydroxydehydroepiandrosterone	1.1.1.49	0.461741	Active
102030	1467907272	16alpha-Hydroxydehydroepiandrosterone	1.1.1.49	0.461741	Active
102030	1467907272	16alpha-Hydroxydehydroepiandrosterone	1.1.1.49	0.461741	Active
20469	1467921745	Beclomethasone	1.14.14.-	0.460784	Active
445905	5462572	(1R,4R,5R)-1,4,5-trihydroxycyclohex-2-ene-1-carboxylic acid	4.2.1.10	0.457317	Active
73571	1467951695	Sakuranetin	1.14.13.39	0.457286	Active
73191	1467944944	Nodakenin	1.1.1.133	0.455645	Active
5879	1467871919	Androsterone	1.1.1.64	0.454545	Active
73191	1467944944	Nodakenin	3.2.1.20	0.453994	Active
102030	1467907272	16alpha-Hydroxydehydroepiandrosterone	1.1.1.49	0.453815	Active
102030	1467907272	16alpha-Hydroxydehydroepiandrosterone	1.1.1.49	0.453815	Active
102030	1467907272	16alpha-Hydroxydehydroepiandrosterone	1.1.1.49	0.453815	Active
510684	6036552	4-[3-(dibenzylamino)phenyl]-2,4-dioxo-butanoic acid	3.1.3.48	0.45283	Active
65110	1467904765	1-(5'-Phosphoribosyl)-5-amino-4-imidazolecarboxamide	3.1.3.11	0.452632	Active
439693	1467887561	Deoxycoformycin	3.5.4.4	0.452261	Active
4601	1467930526	Orphenadrine	1.14.14.-	0.452055	Active
4601	1467930526	Orphenadrine	1.14.14.-	0.452055	Active
4601	1467930526	Orphenadrine	1.14.14.-	0.452055	Active
4601	1467930526	Orphenadrine	1.14.14.-	0.452055	Active
656655	1467983697	Mitobronitol	2.7.1.149	0.452055	Active
447278	5474187	2-[methyl-[(3E,7E)-4,8,12-trimethyltrideca-3,7,11-trienyl]amino]ethyl phosphono hydrogen phosphate	2.5.1.29	0.451852	Active
447278	5474187	2-[methyl-[(3E,7E)-4,8,12-trimethyltrideca-3,7,11-trienyl]amino]ethyl phosphono hydrogen phosphate	2.5.1.29	0.451852	Active
447278	5474187	2-[methyl-[(3E,7E)-4,8,12-trimethyltrideca-3,7,11-trienyl]amino]ethyl phosphono hydrogen phosphate	2.5.1.29	0.451852	Active
447278	5474187	2-[methyl-[(3E,7E)-4,8,12-trimethyltrideca-3,7,11-trienyl]amino]ethyl phosphono hydrogen phosphate	2.5.1.29	0.451852	Active
447278	5474187	2-[methyl-[(3E,7E)-4,8,12-trimethyltrideca-3,7,11-trienyl]amino]ethyl phosphono hydrogen phosphate	2.5.1.29	0.451852	Active
447278	5474187	2-[methyl-[(3E,7E)-4,8,12-trimethyltrideca-3,7,11-trienyl]amino]ethyl phosphono hydrogen phosphate	2.5.1.29	0.451852	Active
447278	5474187	2-[methyl-[(3E,7E)-4,8,12-trimethyltrideca-3,7,11-trienyl]amino]ethyl phosphono hydrogen phosphate	2.5.1.29	0.451852	Active
447278	5474187	2-[methyl-[(3E,7E)-4,8,12-trimethyltrideca-3,7,11-trienyl]amino]ethyl phosphono hydrogen phosphate	2.5.1.29	0.451852	Active
5870	1467871230	Estrone	1.1.1.62	0.450276	Active
5870	1467871230	Estrone	1.1.1.62	0.450276	Active
5870	1467871230	Estrone	1.1.1.62	0.450276	Active
5870	1467871230	Estrone	1.1.1.62	0.450276	Active
5870	1467871230	Estrone	1.1.1.62	0.450276	Active
5870	1467871230	Estrone	1.1.1.62	0.450276	Active
5870	1467871230	Estrone	1.1.1.62	0.450276	Active
5870	1467871230	Estrone	1.1.1.62	0.450276	Active
5870	1467871230	Estrone	1.1.1.62	0.450276	Active
5870	1467871230	Estrone	1.1.1.62	0.450276	Active
5870	1467871230	Estrone	1.1.1.62	0.450276	Active
5870	1467871230	Estrone	1.1.1.62	0.450276	Active
5870	1467871230	Estrone	1.1.1.62	0.450276	Active
5870	1467871230	Estrone	1.1.1.62	0.450276	Active
5870	1467871230	Estrone	1.1.1.62	0.450276	Active
5870	1467871230	Estrone	1.1.1.62	0.450276	Active
449304	1467895763	4-Phospho-D-erythronate	1.1.1.44	0.449664	Active
346926	4537705	4-(2-aminothiazol-4-yl)phenol	3.1.3.11	0.449541	Active
5881	1467878934	Dehydroepiandrosterone	1.1.1.49	0.448649	Active
5881	1467878934	Dehydroepiandrosterone	1.1.1.49	0.448649	Active
5881	1467878934	Dehydroepiandrosterone	1.1.1.49	0.448649	Active
5881	1467878934	Dehydroepiandrosterone	1.1.1.49	0.448649	Active
440624	1467908377	2-Methoxyestrone	1.1.1.62	0.447802	Active
440624	1467908377	2-Methoxyestrone	1.1.1.62	0.447802	Active
5757	1467876271	Estradiol-17beta	1.1.1.62	0.447546	Active
379338	4842710	3-(4-methoxyphenyl)indeno[1,2-c]pyridazin-5-one	2.7.1.40	0.446602	Active
379338	4842710	3-(4-methoxyphenyl)indeno[1,2-c]pyridazin-5-one	2.7.1.67	0.446602	Active
101771	1467984742	Allotetrahydrodeoxycorticosterone	1.1.1.49	0.445923	Active
324351	4315977	2-[[4-[[(2,4-diamino-5-methyl-quinazolin-6-yl)amino]methyl]benzoyl]amino]pentanedioic acid	1.5.1.3	0.445573	Active
41774	1467921414	Acarbose	3.2.1.1	0.441731	Active
41774	1467921414	Acarbose	3.2.1.20	0.441731	Active
41774	1467921414	Acarbose	3.2.1.20	0.441731	Active
41774	1467921414	Acarbose	3.2.1.1	0.441731	Active
41774	1467921414	Acarbose	3.2.1.1	0.441731	Active
41774	1467921414	Acarbose	3.2.1.20	0.441731	Active
41774	1467921414	Acarbose	3.2.1.1	0.441731	Active
41774	1467921414	Acarbose	3.2.1.1	0.441731	Active
41774	1467921414	Acarbose	3.2.1.1	0.441731	Active
41774	1467921414	Acarbose	3.2.1.1	0.441731	Active
41774	1467921414	Acarbose	3.2.1.20	0.441731	Active
41774	1467921414	Acarbose	3.2.1.1	0.441731	Active
102030	1467907272	16alpha-Hydroxydehydroepiandrosterone	1.1.1.49	0.441687	Active
346926	4537705	4-(2-aminothiazol-4-yl)phenol	3.1.3.11	0.44	Active
1662	1467898309	3-Hydroxy-3-methylglutarate	1.1.1.34	0.43949	Active
1662	1467898309	3-Hydroxy-3-methylglutarate	1.1.1.34	0.43949	Active
10680	110474	Flavone	4.2.1.1	0.438596	Active
10680	110474	Flavone	4.2.1.1	0.438596	Active
10680	110474	Flavone	4.2.1.1	0.438596	Active
10680	110474	Flavone	4.2.1.1	0.438596	Active
10680	110474	Flavone	4.2.1.1	0.438596	Active
10680	110474	Flavone	4.2.1.1	0.438596	Active
10680	110474	Flavone	4.2.1.1	0.438596	Active
10680	110474	Flavone	4.2.1.1	0.438596	Active
656655	1467983697	Mitobronitol	2.7.1.149	0.438017	Active
5881	1467878934	Dehydroepiandrosterone	1.1.1.49	0.436508	Active
5881	1467878934	Dehydroepiandrosterone	1.1.1.49	0.436508	Active
5881	1467878934	Dehydroepiandrosterone	1.1.1.49	0.436508	Active
5881	1467878934	Dehydroepiandrosterone	1.1.1.49	0.436508	Active
5881	1467878934	Dehydroepiandrosterone	1.1.1.49	0.436508	Active
5881	1467878934	Dehydroepiandrosterone	1.1.1.49	0.436508	Active
5881	1467878934	Dehydroepiandrosterone	1.1.1.49	0.436508	Active
5881	1467878934	Dehydroepiandrosterone	1.1.1.49	0.436508	Active
82153	1467923051	Flunisolide	1.14.14.-	0.432584	Active
5757	1467876271	Estradiol-17beta	1.1.1.62	0.432137	Active
119339	1467908789	Allosamidine	3.2.1.14	0.431818	Active
119339	1467908789	Allosamidine	3.2.1.14	0.431818	Active
119339	1467908789	Allosamidine	3.2.1.14	0.431818	Active
5573	58189	[2-(dimethylamino)-2-phenyl-butyl] 3,4,5-trimethoxybenzoate	1.3.1.72	0.431373	Active
5573	58189	[2-(dimethylamino)-2-phenyl-butyl] 3,4,5-trimethoxybenzoate	1.3.1.72	0.431373	Active
5573	58189	[2-(dimethylamino)-2-phenyl-butyl] 3,4,5-trimethoxybenzoate	1.3.1.72	0.431373	Active
441350	1467930454	Metyrosine	1.14.14.53	0.43038	Active
441350	1467930454	Metyrosine	1.14.14.-	0.43038	Active
441350	1467930454	Metyrosine	1.14.14.75	0.43038	Active
441350	1467930454	Metyrosine	1.14.14.73	0.43038	Active
461278	5599918	[(2S,5R)-5-(5-methyl-2,4-dioxo-1-pyrimidinyl)-2,5-dihydrofuran-2-yl]methyl dihydrogen phosphate	2.7.4.9	0.43038	Active
2817	29619	5-chloroquinolin-8-ol	3.1.3.48	0.428571	Active
4685	1467923675	1,4-Dichlorobenzene	1.14.14.1	0.428571	Active
4685	1467923675	1,4-Dichlorobenzene	1.14.14.1	0.428571	Active
4685	1467923675	1,4-Dichlorobenzene	1.14.13.-	0.428571	Active
4685	1467923675	1,4-Dichlorobenzene	1.14.13.-	0.428571	Active
4685	1467923675	1,4-Dichlorobenzene	1.14.13.-	0.428571	Active
4685	1467923675	1,4-Dichlorobenzene	1.14.13.-	0.428571	Active
8609	89857	phenyl 4-amino-2-hydroxy-benzoate	3.5.1.98	0.428571	Active
5879	1467871919	Androsterone	1.1.1.64	0.42707	Active
84298	1467950926	Asperuloside	3.2.1.1	0.426956	Active
84298	1467950926	Asperuloside	3.2.1.1	0.423391	Active
73191	1467944944	Nodakenin	3.2.1.20	0.423265	Active
64945	1467941399	Ursolic acid	1.1.1.146	0.422292	Active
64945	1467941399	Ursolic acid	1.1.1.146	0.422292	Active
188323	1468022339	7-Methylcapillarisin	1.14.13.39	0.419868	Active
5879	1467871919	Androsterone	1.1.1.64	0.418838	Active
1662	1467898309	3-Hydroxy-3-methylglutarate	1.1.1.34	0.418605	Active
1662	1467898309	3-Hydroxy-3-methylglutarate	1.1.1.34	0.418605	Active
73571	1467951695	Sakuranetin	1.14.13.39	0.418539	Active
53232	1467923515	Lovastatin	1.1.1.34	0.41784	Active
53232	1467923515	Lovastatin	1.1.1.34	0.41784	Active
53232	1467923515	Lovastatin	1.1.1.34	0.41784	Active
53232	1467923515	Lovastatin	1.1.1.34	0.41784	Active
53232	1467923515	Lovastatin	1.1.1.34	0.41784	Active
53232	1467923515	Lovastatin	1.1.1.34	0.41784	Active
53232	1467923515	Lovastatin	1.1.1.34	0.41784	Active
53232	1467923515	Lovastatin	1.1.1.34	0.41784	Active
[truncated: 75,326 more rows]

## Sheet: S2.2
Drug	ECs	Activity	NICEdrug.ch	Comment
Tolcapone	7.6.2.2	Active	unprocessable
Tolcapone	7.6.2.-	Active	unprocessable
Tolcapone	5.6.1.6	Inactive	No
Tolcapone	3.5.1.98	Inactive	No
Tolcapone	3.1.2.4	Active	No	We found two different bioassays result for EC 3.1.2.4 (bioassay ids in pubchem: 453923736 and 45392379). While one of them shows the activity, the other one is classified as unespecified.
Tolcapone	3.1.13.-	Inactive	No
Tolcapone	2.7.1.67	Inactive	No
Tolcapone	2.1.1.6	Active	Yes

## Sheet: S2.3
Drug	EC	Activity	NICErug.ch	Comment
Pravastatin	1.1.1.141	Inactive	No
Pravastatin	1.13.11.-,1.13.11.31,1.13.11.33,3.3.2.-	Inactive	No
Pravastatin	1.13.11.-,1.13.11.33	Inactive	No
Pravastatin	1.14.14.-	Inactive	No
Pravastatin	1.14.14.1,1.14.14.51,1.14.14.52,1.14.14.53	Inactive	No
Pravastatin	1.14.14.1,1.14.14.51,1.14.14.52,1.14.14.53,1.14.14.75	Inactive	No
Pravastatin	1.14.14.1,1.14.14.55,1.14.14.56,1.14.14.73	Inactive	No
Pravastatin	1.14.14.1,4.2.1.152	Inactive	No
Pravastatin	2.1.1.354	Inactive	No
Pravastatin	2.1.1.37	Inactive	No
Pravastatin	2.3.1.-	Inactive	No
Pravastatin	2.3.1.-,2.3.1.48	Inactive	No
Pravastatin	2.3.1.48	Inactive	No
Pravastatin	2.3.1.51	Inactive	No
Pravastatin	2.3.2.-	Inactive	No
Pravastatin	2.3.2.23	Inactive	No
Pravastatin	2.3.2.27	Inactive	No
Pravastatin	2.7.1.1	Inactive	No
Pravastatin	2.7.1.149	Inactive	No
Pravastatin	2.7.1.40	Inactive	No
Pravastatin	2.7.1.6	Inactive	No
Pravastatin	2.7.1.67	Inactive	No
Pravastatin	2.7.10.2	Inactive	No
Pravastatin	2.7.10.2,2.7.11.1	Inactive	No
Pravastatin	2.7.11.1	Inactive	No
Pravastatin	2.7.11.1,2.7.11.26	Inactive	No
Pravastatin	2.7.11.11	Inactive	No
Pravastatin	2.7.11.13	Inactive	No
Pravastatin	2.7.11.15	Inactive	No
Pravastatin	2.7.11.21	Inactive	No
Pravastatin	2.7.11.24	Inactive	No
Pravastatin	2.7.11.25	Inactive	No
Pravastatin	2.7.12.1	Inactive	No
Pravastatin	2.7.7.7	Inactive	No
Pravastatin	2.7.7.7,4.2.99.-	Inactive	No
Pravastatin	2.7.7.86	Inactive	No
Pravastatin	3.-.-.-	Inactive	unprocessable
Pravastatin	3.1.-.-	Inactive	unprocessable
Pravastatin	3.1.1.-	Inactive	No
Pravastatin	3.1.1.-,3.1.1.3	Inactive	No
Pravastatin	3.1.1.47	Inactive	No
Pravastatin	3.1.1.53	Inactive	No
Pravastatin	3.1.1.89	Inactive	No
Pravastatin	3.1.11.5	Active	unprocessable
Pravastatin	3.1.11.5	Inactive	unprocessable
Pravastatin	3.1.13.-	Inactive	No
Pravastatin	3.1.2.-	Inactive	No
Pravastatin	3.1.27.-	Inactive	No
Pravastatin	3.1.3.1	Inactive	No
Pravastatin	3.1.3.16	Inactive	No
Pravastatin	3.1.3.16,3.1.3.48	Inactive	No
Pravastatin	3.1.3.2,3.1.3.48	Inactive	No
Pravastatin	3.1.3.25,3.1.3.94	Inactive	No
Pravastatin	3.1.3.48	Inactive	No
Pravastatin	3.1.3.75	Inactive	No
Pravastatin	3.1.4.-	Inactive	No
Pravastatin	3.1.4.53	Inactive	No
Pravastatin	3.2.1.20	Inactive	No
Pravastatin	3.4.-.-	Inactive	unprocessable
Pravastatin	3.4.19.12	Inactive	No
Pravastatin	3.4.21.-	Inactive	No
Pravastatin	3.4.21.117	Inactive	No
Pravastatin	3.4.21.38	Inactive	No
Pravastatin	3.4.21.53	Inactive	No
Pravastatin	3.4.21.7	Inactive	No
Pravastatin	3.4.21.73	Inactive	No
Pravastatin	3.4.22.-	Inactive	No
Pravastatin	3.4.22.36	Inactive	No
Pravastatin	3.4.22.56	Inactive	No
Pravastatin	3.4.22.60	Inactive	No
Pravastatin	3.4.24.56	Inactive	No
Pravastatin	3.4.24.69	Inactive	No
Pravastatin	3.4.24.80	Inactive	No
Pravastatin	3.4.24.86	Inactive	No
Pravastatin	3.5.1.98	Inactive	No
Pravastatin	3.5.3.15	Inactive	No
Pravastatin	3.5.4.-	Inactive	No
Pravastatin	3.5.4.38	Inactive	No
Pravastatin	3.6.4.-	Inactive	No
Pravastatin	3.6.4.12	Inactive	No
Pravastatin	4.1.2.13	Inactive	No
Pravastatin	4.1.3.36	Inactive	No
Pravastatin	4.2.1.1	Active	Yes
Pravastatin	4.2.99.21,5.4.4.2,5.4.99.5	Inactive	No
Pravastatin	4.6.1.1	Inactive	No
Pravastatin	4.6.1.2	Inactive	No
Pravastatin	5.2.1.8	Inactive	No
Pravastatin	5.3.4.1	Inactive	No
Pravastatin	5.6.1.6	Inactive	No
Pravastatin	7.6.2.1,7.6.2.2	Inactive	unprocessable
Pravastatin	7.6.2.2	Inactive	unprocessable
Pravastatin	7.6.2.2,7.6.2.3	Inactive	unprocessable

## Sheet: S2.4
Drug	EC	Activity	NICErug.ch	Comment
Oxfenicine	3.5.1.98	Inactive	No
Oxfenicine	3.1.13.-	Inactive	No
Oxfenicine	2.7.1.67	Inactive	No

## Sheet: S2.5
Drug	EC	Activity	NICEdrug.ch	Comment
Dopamine	1.1.1.141	Inactive	No
Dopamine	1.13.11.-,1.13.11.31,1.13.11.33,3.3.2.-	Inactive	No
Dopamine	1.13.11.-,1.13.11.33	Inactive	No
Dopamine	1.14.11.66	Active	No	In this analysis, NICEdrug.ch predicts inhibition according to substrates of enzymes from class 1.14.11.- However, the EC 1.14.11.66 catalyzes multistep reactions with molecules lacking a fully defined structure. Such molecules are not considered in NICEdrug.ch.
Dopamine	1.14.14.-	Inactive	No
Dopamine	1.14.14.1,1.14.14.51,1.14.14.52,1.14.14.53	Inactive	No
Dopamine	1.14.14.1,1.14.14.51,1.14.14.52,1.14.14.53	Inactive	No
Dopamine	1.14.14.1,1.14.14.51,1.14.14.52,1.14.14.53,1.14.14.75	Inactive	No
Dopamine	1.14.14.1,1.14.14.51,1.14.14.52,1.14.14.53,1.14.14.75	Inactive	No
Dopamine	1.14.14.1,1.14.14.55,1.14.14.56,1.14.14.73	Inactive	No
Dopamine	1.14.14.1,1.14.14.55,1.14.14.56,1.14.14.73	Inactive	No
Dopamine	1.14.14.1,4.2.1.152	Inactive	No
Dopamine	1.2.1.12,2.6.99.-	Inactive	No
Dopamine	1.4.3.4	Inactive	No
Dopamine	2.1.1.354	Inactive	No
Dopamine	2.3.1.-,2.3.1.48	Inactive	No
Dopamine	2.7.1.1	Inactive	No
Dopamine	2.7.1.40	Inactive	No
Dopamine	2.7.1.67	Inactive	No
Dopamine	2.7.11.1	Inactive	No
Dopamine	2.7.11.24	Inactive	No
Dopamine	2.7.11.24	Inactive	No
Dopamine	2.7.7.7	Inactive	No
Dopamine	2.7.7.86	Inactive	No
Dopamine	3.1.-.-	Active	unprossable
Dopamine	3.1.13.-	Inactive	No
Dopamine	3.1.3.25,3.1.3.94	Inactive	No
Dopamine	3.1.3.48	Inactive	No
Dopamine	3.1.4.53	Inactive	No
Dopamine	3.2.1.20	Inactive	No
Dopamine	3.4.19.12	Inactive	No
Dopamine	3.4.21.7	Inactive	No
Dopamine	3.4.21.73	Inactive	No
Dopamine	3.4.22.36	Inactive	No
Dopamine	3.4.22.60	Inactive	No
Dopamine	3.5.1.98	Inactive	No
Dopamine	3.5.4.-	Inactive	No
Dopamine	3.6.4.12	Inactive	No
Dopamine	4.2.1.1	Active	Yes
Dopamine	4.6.1.1	Active	No	This molecule acts through signaling."When dopamine binds to Gαs-coupled D1 and D5 receptors, the enzyme adenylate cyclase is activated and the secondary messenger cAMP is produced [https://doi.org/10.1016/j.cell.2005.07.011]"
Dopamine	4.6.1.2	Inactive	No
Dopamine	5.2.1.8	Inactive	No
Dopamine	5.6.1.6	Inactive	No

## Sheet: S2.6
Drug	EC	Activity	NICEdrug.ch	Comment
Acarbose	7.6.2.2	Inactive	unprocessable
Acarbose	5.6.1.6	Inactive	No
Acarbose	5.4.99.9	Inactive	No
Acarbose	5.1.3.13	Inactive	No
Acarbose	3.6.5.-	Inactive	No
Acarbose	3.6.4.12	Inactive	No
Acarbose	3.6.4.-	Inactive	No
Acarbose	3.5.4.38	Inactive	No
Acarbose	3.5.4.-	Inactive	No
Acarbose	3.5.3.15	Inactive	No
Acarbose	3.5.1.98	Inactive	No
Acarbose	3.4.24.56	Inactive	No
Acarbose	3.4.22.56	Inactive	No
Acarbose	3.4.22.-	Inactive	No
Acarbose	3.4.21.-	Inactive	No
Acarbose	3.4.19.12	Inactive	No
Acarbose	3.2.1.20,3.2.1.3	Active	Yes
Acarbose	3.2.1.20	Active	Yes
Acarbose	3.2.1.10,3.2.1.48	Active	Yes
Acarbose	3.2.1.1	Active	Yes
Acarbose	3.1.3.75	Inactive	No
Acarbose	3.1.3.48	Inactive	No
Acarbose	3.1.3.16,3.1.3.48	Inactive	No
Acarbose	3.1.3.16	Inactive	No
Acarbose	3.1.3.1	Inactive	No
Acarbose	3.1.2.-	Inactive	No
Acarbose	3.1.1.89	Inactive	No
Acarbose	3.1.1.47	Inactive	No
Acarbose	3.1.-.-	Inactive	unprocessable
Acarbose	3.-.-.-	Inactive	unprocessable
Acarbose	2.7.7.86	Inactive	No
Acarbose	2.7.7.7,4.2.99.-	Inactive	No
Acarbose	2.7.11.25	Inactive	No
Acarbose	2.7.11.24	Inactive	No
Acarbose	2.7.11.15	Inactive	No
Acarbose	2.7.11.1,2.7.11.26	Inactive	No
Acarbose	2.7.11.1	Inactive	No
Acarbose	2.7.1.6	Inactive	Yes	In this analysis, NICEdrug.ch predicts inhibition according to substrates of enzymes from class 2.7.1.- If we compare specifically with substartes of 2.7.1.6 and 2.7.1.40 NICEdrug.ch doesn’t predict inhibition neither.
Acarbose	2.7.1.40	Inactive	Yes	In this analysis, NICEdrug.ch predicts inhibition according to substrates of enzymes from class 2.7.1.- If we compare specifically with substartes of 2.7.1.6 and 2.7.1.40 NICEdrug.ch doesn’t predict inhibition neither.
Acarbose	2.3.2.27	Inactive	No
Acarbose	2.3.2.23	Inactive	No
Acarbose	2.3.2.-	Inactive	No
Acarbose	2.3.1.48	Inactive	No
Acarbose	2.3.1.157,2.7.7.23	Inactive	No
Acarbose	2.3.1.-,2.3.1.48	Inactive	No
Acarbose	2.1.1.354	Inactive	No
Acarbose	1.8.3.2	Inactive	No
Acarbose	1.2.1.12,2.6.99.-	Inactive	No
Acarbose	1.1.1.133	Inactive	No

## Sheet: S2.7
					Application					Annotation
Tool	Logic	Availability	Scope	Organism	Reactive site or SoM* identification	Biotransformation prediction	Pathway prediction (length)	Drug repurposing	Druggability	Toxicity evaluation	Inhibitory effects	Enzymatic annotation	EC annotation	Kinetic parameters
ADME WORKS Predictor	ML	Commercial	Phase I	Human	No	No	No	No	No	Yes	CYP3A4	No	No	CYP3A4,CYP2D6
ADMET Predictor (Metabolism)	ML	Commercial	Phase I	Human & rat	5 CYPs	Yes	No	No	No	Yes	5 CYPs	5 CYPs	No	5 CYPs
admetSAR	ML	Open access	Phase I	Human	3 CYPs	No	No	No	No	Yes	5 CYPs	3 CYPs	No	No
PreADMET	ML	Open access	Phase I	Human	Yes	No	No	No	No	Yes	CYPs	CYPs	No	No
SMARTCyp	Rule	Open access	Phase I	Human	9 CYPs	No	No	No	No	No	No	No	No	No
SOMP (way2Drug)	ML	Open access	Phase I	Human	5 CYPs	No	No	No	No	No	No	No	No	No
MetaSite	GRID flexible molecular interaction fields	Commercial	Phase I	Human	Yes	Yes	No	No	No	No	No	No	No	No
RS-WebPredictor	ML	Open access	Phase I	Human	9 CYPs	No	No	No	No	No	No	No	No	No
IDSite	Structure based	-	Phase I	Human	CYP2D6	No	No	No	No	No	No	No	No	No
Meteor Nexus	Rule & ML	Commercial	Phase I & II	Mammals	Yes	Yes	Yes (-)	No	No	Yes	No	Yes	No	No
SyGMa	Rule	-	Phase I & II	Human	Yes	Yes	Yes (-)	No	No	No	No	No	No	No
BioTransformer	ML & Rule	Open access	Phase I & II	Human, soil &water microbiota	Yes	Yes	No	No	No	No	No	Yes	Yes	No
Meta-PC	Rule	Commercial	Phase I & II	Human	Yes	Yes	Yes (-)	No	No	Yes	No	No	No	No
TIMES	Rule	Commercial	Phase I & II	Human & rat	Yes	Yes	Yes (-)	No	No	Yes	No	No	No	No
NICEdrug.ch	Rule	Open access	Phase I & II	Human, ecoli, parasite	Yes	Yes	Yes (5)	Yes	Yes	Yes	Yes	Yes	Yes	No
* SoM: Site of metabolism

## Sheet: S2.8
row	name of parent molecule	DOI	parent molecule InCHIkey	parent molecule SMILES	parent molecule NICEdrug ID	metabolites InCHIKEY (separated by comma)	metabolites NICEdrug ID (separated by comma)	Found in 1 rxn step	Found in 2 rxn steps	Found in 3 rxn steps	Found in 4 rxn steps
0	osthole	10.1080/00498254.2017.1306660	MBRLOUHOWLUMFF-UHFFFAOYSA-N	C1=CC(OC)=C(C/C=C(\C)/C)C2OC(=O)C=CC1=2	1467944956	['RAKJVIPCCGXHHS', 'PJCYDTKNZVGNGP', 'NYBDJZVNEBTWCZ', 'CPSTZXBHVSNATC']	[1468024999, 124327188, 104623493, 2844045944]	[1468024999, 104623493]	[]	[124327188, 2844045944]	[]
1	TAK-438	10.1080/00498254.2016.1203505	BFDBKMOZYNOTPK-UHFFFAOYSA-N	C1=CC=CC(F)=C1C1=CC(CNC)=CN1S(C1=CC=CN=C1)(=O)=O	130204975	['BZWNGOCDFFQIEN']	[2844045958]	[]	[2844045958]	[]	[]
2	suvorexant	10.3109/00498254.2015.1129565	JYTNQNCOQXFQPK-UHFFFAOYSA-N	C1=CC(Cl)=CC2N=C(N3CCN(C(=O)C4=CC(C)=CC=C4N4N=CC=N4)C(C)CC3)OC1=2	1468323853	['RXHNQEYGBBHIKB', 'GALQAEACISWTMT']	[2844045979, 211335556]	[211335556]	[2844045979]	[]	[]
3	TSAHC	10.3109/00498254.2015.1081306	KDODYFOOJCIHGK-GIDUJCDVSA-N	C1=C(C)C=CC(S(=O)(NC2=CC=C(C(/C=C/C3=CC=C(O)C=C3)=O)C=C2)=O)=C1	209130034	['XCEAUELSIXURQB']	[114716360]	[]	[114716360]	[]	[]
4	ripasudil	10.3109/00498254.2015.1096981	QSKQVZWVLOIIEV-NSHDSACASA-N	C(S(=O)(N1[C@@H](C)CNCCC1)=O)1=CC=CC2C=NC=C(F)C1=2	95305891	['PWYKBIQGDCSQSN']	[794824281]	[]	[]	[]	[794824281]
5	crizotinib	10.3109/00498254.2014.941964	KTEIFNKAUNYNJU-GFCCVEGCSA-N	C(Cl)1=C(F)C=CC(Cl)=C1[C@@H](C)OC1C(N)=NC=C(C2=CN(C3CCNCC3)N=C2)C=1	1468097142	['VYXKPJJHSCBVDA']	[2844046007]	[]	[]	[]	[]
6	PBPA	10.3109/00498254.2013.850552	OWVIKBRKPCTDEP-UHFFFAOYSA-N	C(C1=CC=C(CNCC(C)C)C=C1)1=CC=CC=C1S(=O)(=O)N1CCCC1	282076481	['RVMRWJXKDVJLRN', 'HXPRKQIWMZGNPX', 'IPLOYGMKWBACPB', 'OOLJTGLSOPDOBX']	[2844046014, 2844046021, 2844046035, 2844046049]	[2844046014, 2844046021, 2844046035]	[2844046049]	[]	[]
7	S002-333	10.3109/00498254.2013.831958	KBVPHVCPUVDXOQ-UHFFFAOYSA-N	C1=CC=CC2NC3CN(S(C4=CC=C(OC)C=C4)(=O)=O)C(C(=O)N)CC=3C1=2	113238681	[ 'CDONKXRMTGYNOQ']	[2844046070]	[2844046070]	[]	[]	[]
8	metoclopramide	10.3109/00498254.2013.835885	TTWJBBZEZQICBI-UHFFFAOYSA-N	C1=C(Cl)C(N)=CC(OC)=C1C(=O)NCCN(CC)CC	1467930078	[ 'RTQMQUZXBADBGJ']	[339753]	[339753]	[]	[]	[]
9	teneligliptin	10.3109/00498254.2013.816891	WGRQANOPCQRCME-UXHICEINSA-N	C1=C(N2C(N3CCN([C@@H0]([HH0])4C[C@@H0]([HH0])(C(=O)N5CSCC5)NC4)CC3)=CC(C)=N2)C=CC=C1	117726271	['ORGQCXKXXRRSMR']	[2844046091]	[]	[2844046091]	[]	[]
10	venetoclax	10.1124/dmd.116.071613	LQBVNQSMGBZMKD-UHFFFAOYSA-N	C1=CC(Cl)=CC=C1C1CC(C)(C)CCC=1CN1CCN(C2=CC(OC3=CN=C4NC=CC4=C3)=C(C(=O)NS(=O)(=O)C3=CC=C(NCC4CCOCC4)C([NH0+]([OH0-])=O)=C3)C=C2)CC1	1468379273	['CICPMKALXAZATM']	[2844046126]	[]	[]	[]	[]
11	CINPA1	10.1124/dmd.116.071993	AYQBYSPEGRYKFA-UHFFFAOYSA-N	C1C2CCC3=CC=C(NC(=O)OCC)C=C3N(C(CN(CC)CC)=O)C=2C=CC=1	10507599	['BHVLAOZBEMMGPS']	[16889139]	[16889139]	[]	[]	[]
12	bupropion (S- and R-)	10.1124/dmd.116.072363	SNPPWIUOZRMYNY-VIFPVBQESA-N	C1=CC=C(Cl)C=C1C(=O)[C@@H](NC(C)(C)C)C	1467921878	['LSZBTGUSYVNVLH', 'RCOBKSKAZMVBHT']	[547792740, 94570010]	[547792740]	[]	[]	[94570010]
13	imipramine	10.1124/dmd.116.071639	BCGWQEUPMDMJNV-UHFFFAOYSA-N	C1C2CCC3=CC=CC=C3N(CCCN(C)C)C=2C=CC=1	1467923348	['ROTCPJFWLNDKHU', 'HCYAFALTSJYZDH']	[1469265572, 1467922588]	[1469265572, 1467922588]	[]	[]	[]
14	lapatinib	10.1124/dmd.116.070839	BCFGMOOMADDAQU-UHFFFAOYSA-N	C1=CC(C2=CC=C(CNCCS(C)(=O)=O)O2)=CC2C(NC3=CC(Cl)=C(OCC4=CC(F)=CC=C4)C=C3)=NC=NC1=2	1468093938	['WPGSOXVHSRJVIL', 'NQHFMDSFFGTFSK', 'SVTCWAMLLWYBEI']	[1114757200, 183764227, 531804501]	[1114757200, 183764227, 531804501]	[]	[]	[]
15	dasabuvir	10.1124/dmd.115.067512	NBRBXGKOEOGLOI-UHFFFAOYSA-N	C1=C(N2C(=O)NC(=O)C=C2)C=C(C(C)(C)C)C(OC)=C1C1=CC2C=CC(NS(=O)(=O)C)=CC=2C=C1	1468340247	['QNBYHXKNWCQTLS']	[214105853]	[214105853]	[]	[]	[]
16	atomoxetine	10.1124/dmd.116.069518	VHGCDTVCOLNTBX-QGZVFWFLSA-N	C1=CC=CC=C1[C@@H](CCNC)OC1=C(C)C=CC=C1	1468368999	['QEXPFYRHIYKWEW', 'PPXQPRLGNSJNJM', 'FYSYNTKLUNOCQR']	[2923600, 1469263222, 95501250]	[2923600, 1469263222, 95501250]	[]	[]	[]
17	turinabol	10.1124/dmd.115.066829	AGUNEISBPXQOPA-UCQVKRNQSA-N	C1=CC(=O)C(Cl)=C2CC[C@@H0]([HH0])3[C@H0]([HH0])4CC[C@H0](C)(O)[C@H0]4(C)CC[C@@H0]3([HH0])[C@@H0]12C	1468439877	['AFCVOONJTTXNFZ']	[2844046133]	[2844046133]	[]	[]	[]
18	axitinib	10.1124/dmd.115.065615	RITAVMQDGBJQJZ-FMIVXFBMSA-N	C1=CC=CN=C1/C=C/C1C2C=CC(SC3=CC=CC=C3C(=O)NC)=CC=2NN=1	1468251409	['MAHSNFBPPYMWFB', 'ALSDUZBWFAEEIQ']	[552114807, 2844046147]	[552114807]	[2844046147]	[]	[]
19	bosentan	10.1124/dmd.115.067074	GJPICJJJRGTNOD-UHFFFAOYSA-N	C1=CC(C(C)(C)C)=CC=C1S(=O)(=O)NC1=NC(C2=NC=CC=N2)=NC(OCCO)=C1OC1=CC=CC=C1OC	1468177210	['STTLKJGYAWXIPP', 'FAJQMBCLPZWTQJ']	[60605273, 60605262]	[60605273, 60605262]	[]	[]	[]
20	GDC-0623	10.1124/dmd.115.067181	RFWVETIZUQEJEF-UHFFFAOYSA-N	C(C(=O)NOCCO)1C=CC2=CN=CN2C=1NC1=CC=C(I)C=C1F	261332448	['WAVSNGNSMMWBRX']	[1114326002]	[]	[1114326002]	[]	[]
21	montelukast	10.1124/dmd.115.065763	JWYNTRGPVRMUCW-ICFJDMLASA-N	C1=CC(Cl)=CC2N=C(/C=C/C3=CC=CC([C@H](SCC4(CC4)C(O)=O)CCC4=C(C(C)(C)O)C=CC=C4)=C3)C=CC1=2	405948575	['OKRZLLFDJNNDKI', 'FVZCMEHJZIMABA']	[2844046175, 2844046182]	[2844046175, 2844046182]	[]	[]	[]
22	olanzapine	10.1124/dmd.115.064790	KVWDHTXUZHCGIO-UHFFFAOYSA-N	C1=CC=CC2N=C(N3CCN(C)CC3)C3C=C(C)SC=3NC1=2	1467925611	['FHPIXVHJEIZKJW', 'SMNUCABXNXAPBY', 'FPDIERBPQFAFSI', 'LJVNYCDXBXGQIK']	[1469265658, 1469265646, 1469265988, 2647723980]	[1469265658, 1469265646, 1469265988, 2647723980]	[]	[]	[]
23	benzbromarone	10.1124/dmd.115.065037	WIHMPDIAZBTIBG-UHFFFAOYSA-N	C1=CC=CC2C(C(C3=CC(Br)=C(O)C(Br)=C3)=O)C(CC)OC1=2	1105716298	['IELUPRVYGHTVHQ']	[1468008580]	[]	[]	[]	[1468008580]
24	trimethoprim	10.1124/dmd.115.065193	IEDVJHCEMCRBQM-UHFFFAOYSA-N	C1=NC(N)=NC(N)=C1CC1=CC(OC)=C(OC)C(OC)=C1	1467885143	['ZQRSRBQVQNNQKD', 'HPOCGNHBIFZCAN', 'HWBPOLWLLFXEJY']	[279691066, 101327804, 121144226]	[279691066, 101327804, 121144226]	[]	[]	[]
25	ifosfamide	10.1124/dmd.115.063628	HOMGKSMUEGBAAB-UHFFFAOYSA-N	N(CCCl)1P(=O)(NCCCl)OCCC1	1467923337	['ROGLJLJCDSTWBN', 'JHUJMHKRHQPBRG', 'DZKGMGPLDJOVCX', 'QSKPIOLLBIHNAC']	[1468011540, 1468011521, 1468011490, 1467920964]	[1468011540, 1468011521, 1468011490]	[]	[]	[1467920964]
26	lenvatinib	10.1124/dmd.114.058073	WOSKHXYHFSIKNG-UHFFFAOYSA-N	C1=C(OC)C(C(=O)N)=CC2C(OC3=CC=C(NC(=O)NC4CC4)C(Cl)=C3)=CC=NC1=2	1468346008	['XEZZOIWZFIDBIQ', 'PLCPYTNTMUKPOL']	[2649437978, 785516986]	[2649437978, 785516986]	[]	[]	[]
27	evodiamine	10.1124/dmd.114.057414	TXDUTHBFYKGSAH-UHFFFAOYSA-N	C1=CC=CC2NC3C4N(C)C5C=CC=CC=5C(=O)N4CCC=3C1=2	1467943832	['XYSMNZWLVJYABK', 'XFCRUEXOGLDHNW']	[377652043, 2844046217]	[377652043, 2844046217]	[]	[]	[]
28	ticlopidine	10.1124/dmd.113.053017	PHWBOXQYWZNQIN-UHFFFAOYSA-N	C1=CSC2CCN(CC3=C(Cl)C=CC=C3)CC1=2	1467924111	['DJZQIXWGIZIETJ']	[1468598324]	[]	[1468598324]	[]	[]

## Sheet: S2.9
PUBCHEM ID	SMILES	NICEdrug ID	PUBCHEM_ACTIVITY_OUTCOME	NICEdrug toxicity score
323	C1=CC=C2C(=C1)C=CC(=O)O2	3485	-1	5
5284344	C([C@@H](C(=O)O)N)O/C(=C/[N+]#N)/[O-]	8861	-1	1.67308
1219	CCCN(CCC)C1CCC2=C(C1)C=C(C=C2)O	12992	-1	1.41642
1400	CC1=CC=C(C=C1)C2=NN(C3=C2C(=NC=N3)N)C(C)(C)C	14896	-1	4.94143
1609	C1=CC=C2C(=C1)C(=C(OC2=O)Cl)Cl	16995	1	5.26965
1683	CN1C2CCC1CC(C2)OC(=O)C3=CC(=CC(=C3)Cl)Cl	17743	-1	1.92006
1694	C1(=C(C2=NNN=C2C(=C1Br)Br)Br)Br	17862	-1	4
1733	CC1=C(C2=CC=CC=C2C=N1)C#N	18291	-1	0.939815
66377	CCC1=CN(C(=O)NC1=O)[C@H]2C[C@@H]([C@H](O2)CO)O	19136	-1	3.92
1892	CN1C2=C(C(=O)N(C1=O)C)N(C=N2)CCO	19922	-1	3.54755
1893	C1=CC2=C(C(=C1)[N+](=O)[O-])NN=C2	19933	-1	10.5685
1979	CC(=O)OC1CN2CCC1CC2	20809	-1	3
2044	CC(C)(C)C1=C(C(=CC(=C1)C=C(C#N)C#N)Br)O	21486	-1	22.2043
2048	CC1=CC2=NC=C(N=C2C=C1C)C3=CC=CC=C3	21519	-1	0
2049	COC1=C(C=C2C(=C1)N=CC(=N2)C3=CC=CC=C3)OC	21530	-1	0.610169
2063	COC1=CC=C(C=C1)C=C(C#N)C#N	21662	-1	0
2120	C1=CC2=C3C(=C1)C(=O)N(C(=O)C3=CC=C2)CC(=O)O	22280	-1	4.47388
2132	C1CC(CCC1NCC2=CC(=CC(=C2N)Br)Br)O	22401	-1	5.83815
2264	CN1C(=O)COC2=C1C=C(C=C2C(=O)NC3CN4CCC3CC4)Cl	23796	-1	5.07606
2310	CCC1(CC(=O)NC(=O)C1)C	24260	-1	5.36453
2318	CC(CC1=CC(=CC=C1)C(F)(F)F)NCCOC(=O)C2=CC=CC=C2	24346	-1	17.0598
2400	CN1C(=O)C(=C(C1=O)C2=CNC3=CC=CC=C32)C4=CNC5=CC=CC=C54	25211	-1	0
2427	CN1C=NC2=C1C=C3C(=C2)C(=NC=N3)NC4=CC(=CC=C4)Br	25497	-1	7.72951
2446	CCN(CC)CCNC(=O)C1=CC(=C(C=C1OC)N)Br	25698	-1	6.0303
2467	COC1=CC(=C(C(=C1)OC)C(=O)CCCN2CCCC2)OC	25923	-1	1.96698
2480	CCCCN(CCCC)CCCOC(=O)C1=CC=C(C=C1)N	26064	-1	13.7455
636403	C[C@]12CC[C@](C[C@H]1C3=CC(=O)[C@@H]4[C@]5(CC[C@@H](C([C@@H]5CC[C@]4([C@@]3(CC2)C)C)(C)C)OC(=O)CCC(=O)O)C)(C)C(=O)O	26897	-1	20.8321
2562	CCN(CC)CCOCCOC(=O)C1(CCCC1)C2=CC=CC=C2	26908	-1	12.1508
5472558	C1=CC=C2C(=C1)/C(=C\C3=C(NC4=CC=CC=C43)Cl)/C(=O)N2	27377	-1	11.7667
2741	C1=CC=C2C(=C1)C(=O)C=C(O2)C(=O)O	28808	-1	1.0242
2753	CN(C1CCCCC1)C(=O)CCCOC2=CC3=C(C=C2)NC(=O)C=C3	28929	-1	0.674603
2755	CC(C)NCC(C1=CC(=C(C=C1)N)C#N)O	28951	-1	2.91667
5353532	C1CN(CCN1/C=C/CC2=CC=CC=C2)C(C3=CC=CC=C3)C4=CC=CC=C4	29006	-1	0
2765	C1CC1C2=CC=CC=C2OCC3=NCCN3	29061	-1	0
2780	COC1=CC(=C(C=C1C(=O)NC2CCN(CC2)CC3=CC=CC=C3)Cl)N	29215	-1	13.4148
71386	CCCC(=O)O[C@@]1([C@H](C[C@@H]2[C@@]1(CC(=O)[C@]3([C@H]2CCC4=CC(=O)C=C[C@@]43C)F)C)C)C(=O)CCl	29344	-1	54.7014
12492	C[C@@H]1CCC[C@@H](N1NC(=O)C2=CC(=C(C=C2)Cl)S(=O)(=O)N)C	29476	-1	12
2804	CC1CCCC(N1NC(=O)C2=CC(=C(C=C2)Cl)S(=O)(=O)N)C	29476	-1	12
12492	C[C@@H]1CCC[C@@H](N1NC(=O)C2=CC(=C(C=C2)Cl)S(=O)(=O)N)C	29476	-1	12
2804	CC1CCCC(N1NC(=O)C2=CC(=C(C=C2)Cl)S(=O)(=O)N)C	29476	-1	12
2805	C1CCN(CC1)CCOC(C2=CC=CC=C2)C3=CC=C(C=C3)Cl	29487	-1	1.79364
5311053	C1[C@@H]([C@@H]([C@H]([C@@H]1O)/C=C/[C@H](COC2=CC(=CC=C2)Cl)O)C/C=C\CCCC(=O)O)O	29509	-1	1.91618
2817	C1=CC2=C(C=CC(=C2N=C1)O)Cl	29619	-1	11.8
2818	CN1CCN(CC1)C2=C3C=CC=CC3=NC4=C(N2)C=C(C=C4)Cl	29630	-1	6.45789
2856	CC(C)N1C=NC2=C1N=C(N=C2NC3=CC(=CC=C3)Cl)NCCO	30048	-1	8.87169
2984	CCCCN1C2=C(C(=O)N(C1=O)CCCC)N(C=N2)CC(=O)C	31348	-1	6.26005
3074	COC1=CC(=CC(=C1OC)OC)C(=O)OCCCN2CCCN(CC2)CCCOC(=O)C3=CC(=C(C(=C3)OC)OC)OC	32298	-1	7.90029
23806119	C1=C2C(=CC(=C1Cl)Cl)N(C=N2)C3[C@H]([C@H](C(O3)CO)O)O	33245	-1	9.92
6610267	C1=C2C(=CC(=C1Cl)Cl)N(C=N2)[C@H]3C([C@H]([C@H](O3)CO)O)O	33245	-1	9.92
23806119	C1=C2C(=CC(=C1Cl)Cl)N(C=N2)C3[C@H]([C@H](C(O3)CO)O)O	33245	-1	9.92
6610267	C1=C2C(=CC(=C1Cl)Cl)N(C=N2)[C@H]3C([C@H]([C@H](O3)CO)O)O	33245	-1	9.92
3242	CC1=CC(=NC(=N1)N2C(=CC(=N2)C)OC)OC	34064	-1	0
5702173	CC(=O)O[C@H]1CCC2[C@@]1(CCC3C2CCC4=C3C=CC(=C4)OC(=O)C)C	34276	-1	8.79468
3277	CCN1C2=NC=C(C(=C2C=N1)NN=C(C)C)C(=O)OCC	34419	-1	4.6518
3280	CCOC1=C(C=C(C=C1)CC2=NC=CC3=CC(=C(C=C32)OCC)OCC)OCC	34452	-1	4.36318
3306	CCNCC(C1=CC(=CC=C1)O)O	34727	-1	1.65006
3336	CC(C1=CC=CC=C1)NCCC(C2=CC=CC=C2)C3=CC=CC=C3	35035	-1	0
3344	C1CN(CCC12CNC(=O)O2)CCC3=CC=CC=C3	35123	-1	0
3351	C1CN(CCN1CC2=CC3=C(C=C2)OCO3)C(=O)COC4=CC=C(C=C4)Cl	35198	-1	4.47598
3362	CCC(=O)C1=C(C=C(C=C1O)O)O	35315	-1	9.77771
3002119	CC1=NC=C(C(=N1)N)CN(C=O)/C(=C(\CCO)/SSCC2CCCO2)/C	36163	-1	29.8889
3447	CCOC(=O)C1=CC=C(C=C1)OC(=O)CCCCCN=C(N)N	36229	-1	10.112
3547	C1CNCCN(C1)S(=O)(=O)C2=CC=CC3=C2C=CN=C3	37268	-1	1.82592
443943	C[C@]12CCC(=O)C=C1CC[C@@H]3[C@@]2([C@H](C[C@]4([C@H]3C[C@@H]5[C@]4(OC(O5)(C)C)C(=O)CCl)C)O)F	37334	-1	37.918
3627	CN1CCCN(CC1)C(C2=CC=CC=C2)C3=CC=C(C=C3)Cl	38067	-1	5.94545
3689	CC(C(C1=CC=C(C=C1)O)O)N2CCC(CC2)CC3=CC=CC=C3	38709	-1	2
3783	CC(COC1=CC=CC=C1)NC(C)C(C2=CC=C(C=C2)O)O	39674	-1	2
44483357	C[C@H](COC1=CC=CC=C1)NC(C)[C@@H](C2=CC=C(C=C2)O)O	39674	-1	2
3783	CC(COC1=CC=CC=C1)NC(C)C(C2=CC=C(C=C2)O)O	39674	-1	2
44483357	C[C@H](COC1=CC=CC=C1)NC(C)[C@@H](C2=CC=C(C=C2)O)O	39674	-1	2
3820	C1C2=C(C3=CC=CC=C3NC1=O)NC4=C2C=C(C=C4)Br	40073	-1	12.4402
5702228	C[C@@H]1[C@H]([C@H](C[C@@H](O1)O[C@H]2CC[C@]3(C(C2)CCC4C3C[C@H]([C@]5([C@@]4(CC[C@@H]5C6=CC(=O)OC6)O)C)O)C)O)O[C@H]7C[C@@H]([C@@H]([C@H](O7)C)O[C@H]8C[C@@H]([C@@H]([C@H](O8)C)O[C@H]9[C@@H]([C@H]([C@@H]([C@H](O9)CO)O)O)O)OC(=O)C)O	40650	1	71
23760717	CCCNC(=O)[C@@H]1[C@H](O1)C(=O)N[C@@H](C(C)CC)C(=O)N2CCC[C@H]2C(=O)OC	42172	-1	12.6581
4031	CCN(CCCCOC(=O)C1=CC(=C(C=C1)OC)OC)C(C)CC2=CC=C(C=C2)OC	42216	-1	1.24788
4045	CCN(CC)CCNC(=O)COC1=CC=C(C=C1)OC	42359	-1	1.28805
4165	CC1=C(C=C2C(=C1)CCCS2(=O)=O)S(=O)(=O)N	43601	-1	0
5353788	CCO/C(=N/C1=C[N+](=NO1)N2CCOCC2)/[O-]	44338	-1	0.29434
5360788	CCO/C(=N\C1=C[N+](=NO1)N2CCOCC2)/[O-]	44338	-1	0.29434
4239	CCOC(=O)NC1=C[N+](=NO1)N2CCOCC2	44338	-1	0.29434
5353788	CCO/C(=N/C1=C[N+](=NO1)N2CCOCC2)/[O-]	44338	-1	0.29434
5360788	CCO/C(=N\C1=C[N+](=NO1)N2CCOCC2)/[O-]	44338	-1	0.29434
4239	CCOC(=O)NC1=C[N+](=NO1)N2CCOCC2	44338	-1	0.29434
5353788	CCO/C(=N/C1=C[N+](=NO1)N2CCOCC2)/[O-]	44338	-1	0.29434
5360788	CCO/C(=N\C1=C[N+](=NO1)N2CCOCC2)/[O-]	44338	-1	0.29434
4239	CCOC(=O)NC1=C[N+](=NO1)N2CCOCC2	44338	-1	0.29434
4260	CC1=CC(=C(C=C1OC(=O)C)C(C)C)OCCN(C)C	44554	-1	11.8
122623	C1C[C@H](N(C1)C(=O)[C@@H]2CCCN2C(=O)OCC3=CC=CC=C3)C=O	45498	-1	5.64774
4417	CCN(CC)CCOC(=O)C(CC1CCCO1)CC2=CC=CC3=CC=CC=C32	46228	-1	7.63636
4418	COC1=CC=CC=C1N2CCN(CC2)CC(COC3=CC=CC4=CC=CC=C43)O	46239	-1	4.68571
4472	C1=CC=C(C=C1)CNC(=O)CCNNC(=O)C2=CC=NC=C2	46805	-1	16.0469
4487	CC1=C(C(=O)N(N1C)C2=CC=CC=C2)NC(=O)C3=CN=CC=C3	46968	-1	0.275591
4511	C1=C(C=C(C=C1[N+](=O)[O-])[N+](=O)[O-])C(=O)N	47221	-1	21
4615	C1CN(CCN1CCCN2C3=CC=CC=C3NC2=O)C(C4=CC=CC=C4)C5=CC=CC=C5	48290	-1	0
4622	CCCOC1=CC2=C(C=C1)N=C(N2)NC(=O)OC	48367	1	18.0645
4622	CCCOC1=CC2=C(C=C1)N=C(N2)NC(=O)OC	48367	-1	18.0645
4622	CCCOC1=CC2=C(C=C1)N=C(N2)NC(=O)OC	48367	1	18.0645
4622	CCCOC1=CC2=C(C=C1)N=C(N2)NC(=O)OC	48367	-1	18.0645
5282440	C1=CC(=CC=C1CN2C=CN=C2)/C=C/C(=O)O	48616	-1	6.03448
4814	COC1=C(C=C(C=C1)C(=O)NCC2=CN=CC=C2)C(=O)NCC3=CN=CC=C3	50405	-1	0
4822	CN1CCC(=C2C3=CC=CC=C3SC4=CC=CC=C42)CC1	50476	-1	0
4826	CC(C(C)(C)C)N=C(NC#N)NC1=CC=NC=C1	50520	-1	0.549555
4839	CCN1CCCC(C1)OC(=O)C(C2=CC=CC=C2)C3=CC=CC=C3	50661	-1	10.485
4847	CC1=C(C(=O)N2C=CC=CC2=N1)CCN3CCC(CC3)C(=O)C4=CC=C(C=C4)F	50749	-1	7.46425
4849	C1CCN(C1)C2=C(C(=CC(=C2)C(=O)O)S(=O)(=O)N)OC3=CC=CC=C3	50771	-1	3.4002
4850	C1CN(CCN1CC2=CC3=C(C=C2)OCO3)C4=NC=CC=N4	50782	-1	2.93258
4855	CCN1C=C(C(=O)C2=CN=C(N=C21)N3CCCC3)C(=O)O	50835	-1	5.83334
4879	C1=CC=C(C=C1)N2C3=C(C=N2)C(=NC=N3)N	51088	-1	6.71429
4893	COC1=C(C=C2C(=C1)C(=NC(=N2)N3CCN(CC3)C(=O)C4=CC=CO4)N)OC	51209	-1	18
4904	C1CCN(CC1)CCC(C2=CC=CC=C2)(C3=CC=CC=C3)O	51330	-1	1
4938	CCCN1C=NC2=C1C(=O)N(C(=O)N2C)CCCCC(=O)C	51704	-1	9.27044
4977	CC(CN1C=NC2=C1C(=O)N(C(=O)N2C)C)O	52101	-1	3.55872
4994	CCC1(C(=O)C=CNC1=O)CC	52253	-1	0.306667
5042	C1=CC=C2C(=C1)C(=CC(=O)N2)CC(C(=O)O)NC(=O)C3=CC=C(C=C3)Cl	52750	-1	1.82683
5087	CCCCOC1=C(C=CC(=C1)CC2CNC(=O)N2)OC	53197	-1	2.24983
5094	CN1C(=CN=C1COC(=O)N)[N+](=O)[O-]	53274	-1	6.79765
3033769	CCN1CCC[C@H]1CNC(=O)C2=C(C(=CC(=C2OC)Cl)Cl)O	53510	-1	0
5174	CC1=NC(=C(O1)C2=CC=NC=C2)C3=CC=CC=C3	54044	-1	0.650101
5186	C1=CC2=C3C(=C1)C(=O)N(C(=O)C3=CC=C2)CCCCCC(=O)NO	54161	1	21.8421
5228	C1CSC2=NC(=C(N21)C3=CC=NC=C3)C4=CC=C(C=C4)F	54591	-1	3.07238
5268	C1CN(CCC12C(=O)NCN2C3=CC=CC=C3)CC4COC5=CC=CC=C5O4	55023	-1	8.42177
5278	C1=CC=C2C(=C1)C(=NN(C2=O)CC3=C(C=C(C=C3)Br)F)CC(=O)O	55131	-1	0.934814
5319	C1=CC=C(C=C1)C(=O)NS(=O)(=O)C2=CC=C(C=C2)N	55562	-1	12.75
5324	C1=CC(=CC=C1N)S(=O)(=O)N=C(N)N	55617	-1	10.8602
5334	CC(=O)NC1=CC=C(C=C1)S(=O)(=O)NC2=CC=C(C=C2)[N+](=O)[O-]	55725	-1	10.5573
657255	CCCCCCCCN[C@H](C)[C@H](C1=CC=C(C=C1)SC(C)C)O	55923	-1	19
6769	CCOC(=O)OC1=C(C=C(C=C1OC)C(=O)O[C@@H]2C[C@@H]3CN4CCC5=C([C@H]4C[C@@H]3[C@@H]([C@H]2OC)C(=O)OC)NC6=C5C=CC(=C6)OC)OC	56062	-1	16
5374	C=CCN1CCC2=C(CC1)SC(=N2)N	56137	-1	4.33334
5387	CC1=C2C(=CS1)C(=O)NC3=CC=CC=C3N2C(=O)CN4CCN(CC4)C	56278	-1	1.08213
11957722	CCN(CC)C(=O)N[C@@H]1C[C@H]2[C@@H](CC3=CNC4=CC=CC2=C34)N(C1)C	56476	-1	1.7385
5457	CN(C)CCN(CC1=CC=C(C=C1)OC)C2=NC=CC=N2	56958	-1	3.85266
5501	CCOC(=O)NNC1=NN=CC2=CC=CC=C21	57413	-1	3.04831
5511	CC1=CC=C(C=C1)C(=O)C(C)CN2CCCCC2	57521	-1	2.2619
5522	CCCCNC1=C2C=NN(C2=NC(=C1C(=O)OCC)C)CC	57634	1	7.46535
5531	CCN(CC)C1=CC(=NC2=NC=NN12)C	57733	-1	0.52739
5606	CC(C)(C)NCC(C1=CC=CC=C1Cl)O	58533	-1	1.81132
5639	CN1C(=CC(=O)N(C1=O)C)NCCCN2CCN(CC2)C3=CC=CC=C3OC	58868	-1	4.27471
5329155	C1CCC2=C(C1)C=C(N2)/C=C\3/C4=C(C=CC(=C4)Br)NC3=O	59042	-1	5.44803
443955	CC[C@@]12CCCN3[C@@H]1C4=C(CC3)C5=CC=CC=C5N4C(=C2)C(=O)OCC	59222	-1	12
5687	COC1=C(C=C2C(=C1)C(=NC=N2)NC3=CC(=CC=C3)O)OC	59359	-1	11.8
5707	CC1=C(C(=CC=C1)C)NC2=NCCCS2	59567	-1	4.33005
5722	CCCOC1=CC=CC=C1C2=NC(=O)C3=NNNC3=N2	59730	-1	0
5475158	CN(C)CCCSC1=CC=CC=C1NC(=O)/C=C/C2=CC=CC=C2	61724	-1	23
5388959	CC(=O)OCC(=O)[C@]1(CC[C@@H]2[C@@]1(C[C@@H]([C@]3([C@H]2CCC4=CC(=O)C=C[C@@]43C)Cl)Cl)C)O	68777	-1	39.8072
6857	CCCCC1=CC2=CC=CC=C2C(=N1)OCCN(C)C	71394	-1	2.46808
8593	C1=CC=C(C=C1)C2=NC3=CC=CC=C3C(=C2)C(=O)O	89725	-1	2.54396
8609	C1=CC=C(C=C1)OC(=O)C2=C(C=C(C=C2)N)O	89857	-1	15.2297
8739	C1=CC(=CC=C1C(=O)O)S(=O)(=O)N	91056	-1	1.87097
9363	CCN(CC)C(=O)C1=CC(=C(C=C1)O)OC	97054	-1	6.9358
9419	CN1C2=CC=CC=C2C(=O)N(C3=CC=CC=C31)CCN(C)C	97579	-1	2.15073
10745	CC(=O)OC1=CC=CC=C1C(=O)OC2=CC=CC=C2C(=O)O	111099	-1	13.6109
12555	CN(C)CCCOC1=NN(C2=CC=CC=C21)CC3=CC=CC=C3	130065	-1	0
13738	CCN(CC)CCC1=NC(=NO1)C2=CC=CC=C2	142217	-1	0.354839
5337997	C1=CC(=CC=C1C(=O)N/N=C/C2=CC=C(O2)[N+](=O)[O-])O	142488	-1	23.6773
14709	CC(=O)O[C@H]1CC[C@@]2([C@H]3CC[C@]4([C@H]([C@@H]3CC=C2C1)CCC4=O)C)C	151887	-1	11.5628
15139	COC1=CC=CC=C1N2CCN(CC2)CCCC(=O)C3=CC=C(C=C3)F	156050	-1	8
15723	C1CNCCC1C(C2=CC=CC=C2)(C3=CC=CC=C3)O	162000	-1	1.66864
16351	CN1CCN(CC1)C2=NC3=CC=CC=C3SC4=C2C=C(C=C4)Cl	168148	-1	6.83903
453131	COC1=C(C(=C2C(=C1)CC[C@@H](C3=CC(=O)C(=CC=C32)O)N)OC)OC	194490	-1	4.96408
21109	COC1=C(C(=C(C=C1)CN2CCNCC2)OC)OC	215551	-1	7.8029
22530	CN1CCC2=C(C1)C3=CC=CC=C3N2CC4=CC=CC=C4	229519	-1	0
24733	CC(=O)OCC(=O)[C@H]1CC[C@@H]2[C@@]1(CC(=O)[C@H]3[C@H]2CC[C@@H]4[C@@]3(CC[C@H](C4)O)C)C	250890	-1	13.4335
26248	CC(=O)OC1=CC=CC2=C1C(=O)C3=C(C=C(C=C3C2=O)C(=O)O)OC(=O)C	265523	-1	16.0745
26596	CCCCC1=CC2=C(C=C1)N=C(N2)NC(=O)OC	269053	1	18.0645
27648	CC(CN(C1=C(C=C(C(=C1I)N)I)I)C(=O)C)C(=O)O	279481	-1	18.6433
30627	COC1=CC(=CC(=C1OC)OC)C(=O)NCCCCCC(=O)O	309342	-1	8.32884
32170	CCCNC(C)C(=O)NC1=C(SC=C1C)C(=O)OC	324398	-1	8.59223
33925	CCC1(C(=O)N(C(=O)N(C1=O)COC)COC)C2=CC=CC=C2	341448	-1	4.73659
5361131	C/C(=N\O)/CC1(C2=CC=CC=C2N(C1=O)C)O	402250	-1	2.47142
41049	CCC1(CCCCN(C1)C)C2=CC(=CC=C2)O	411161	-1	0.681035
43231	C1=C(C(=CC(=C1N)S(=O)(=O)N)S(=O)(=O)N)C(=C(Cl)Cl)Cl	432846	-1	1.48369
51703	CCN1CCC(=CC1)C2=CNC3=CC=CC=C32	512895	-1	0
107751	CC(=O)SCC(CC1=CC=CC=C1)C(=O)NCC(=O)OCC2=CC=CC=C2	599118	-1	5.27354
60860	C1=CC(=CC(=C1)I)CN=C(N)N	602029	-1	2.34859
63994	C1CC(=O)N(C1)CC(CN2CCOCC2)SC3=NC4=CC=CC=C4C(=O)N3C5=CC=CC=C5	632140	-1	0
66440	C[C@]12CC[C@H]3[C@H]([C@@H]1CC[C@@H]2OC(=O)CCC(=O)O)CCC4=C3C=CC(=C4)O	656806	-1	6.9882
68093	CC(=O)OC1=CC=CC(=C1OC(=O)C)C(=O)O	674035	-1	12.8769
68802	CC1=CC2=C(C=C1)N3CCNC4C3=C2CCC4	681062	-1	2.27869
69588	C1=CC=C(C=C1)C2=C(N=CN2)C3=CC=CC=C3	689371	-1	0
71815	CC1=NC=C(N1CC(C)O)[N+](=O)[O-]	711876	-1	15.269
72067	CC(=O)NC1CCC2=CC(=C(C(=C2C3=CC=C(C(=O)C=C13)SC)OC)OC)O[C@H]4[C@@H]([C@H]([C@@H]([C@H](O4)CO)O)O)O	714292	-1	13.9322
72124	CC1CC(=O)NN=C1C2=CC=C(C=C2)NC(=NC)NC#N	714869	-1	5.82222
244898	CC(=O)N[C@H]1CCC2=CC(=C(C(=C2C3=C1[C@H]4[C@@H]3C=C(C4=O)OC)OC)OC)OC	719216	-1	4.91228
77553	CC(=O)C1=CC2=CC=CC=C2OC1=O	1912293	-1	7.62577
77918	C1=CC=C(C=C1)CN2C=CN=C2	1916086	-1	0
81423	C1=CC2=C(C=C1N)NN=C2	1950344	-1	7.06542
91668	CC1=C[C@@H]2[C@H](CC[C@]3([C@H]2CC[C@@]3(C(=O)C)OC(=O)C)C)[C@@H]4C1=CC(=O)CC4	2053389	-1	35.3652
91851	CCOC(=O)C1=NC2=NC(=CC(=O)N2N1)C	2055249	-1	0.551599
115936	CC(C)OC1=CC=C(C=C1)C(=O)CCN2CCCCC2	2288920	-1	0
119122	CC[C@@]1(C2=C(COC1=O)C(=O)N3CC4=C(C3=C2)NC5=CC=CC(=O)C5=C4)O	2320301	1	17.6339
136620	CC(=O)NC1=CC2=CC=CC=C2OC1=O	2480835	-1	3.74798
151506	CS(=O)(=O)NC1=CC=CC2=C1N=CC=C2	2628073	-1	6.26956
161091	C1=CC=C(C=C1)C2=CC(=O)C3=CC=CC=C3N2	2717205	-1	1
161091	C1=CC=C(C=C1)C2=CC(=O)C3=CC=CC=C3N2	2717205	1	1
161091	C1=CC=C(C=C1)C2=CC(=O)C3=CC=CC=C3N2	2717205	-1	1
161091	C1=CC=C(C=C1)C2=CC(=O)C3=CC=CC=C3N2	2717205	1	1
164676	CC1=COC2=C1C(=O)C(=O)C3=C2C=CC4=C3CCCC4(C)C	2748864	-1	13
212810	CCOC(=O)N1C2=C(C=CC(=C2)Cl)OC1=O	3195242	-1	1.09091
223821	CC1=CC(=O)OC2=C1C=C(C=C2)OC	3304854	-1	4
223910	COC(=O)CSC1=CC=CC=C1C(=O)OC	3305667	-1	0.958988
224199	C1=CC=NC(=C1)NS(=O)(=O)C2=CC=C(C=C2)Cl	3308726	-1	8.36957
260992	C1CCC(C(C1)C(=O)NC2=NC=CS2)C(=O)O	3683334	-1	1.04184
5382840	CCOC(=O)/C=C/1\NC(=O)CS1	3976327	-1	2.16129
332934	CCOC(=O)C1=C(NC(=O)NC1C2=CC=C(C=C2)N(C)C)C	4399189	-1	14.9472
362128	CN1CC(=O)N(C2=C(C1=O)N(C=N2)CC3=CC=CC=C3)C	4686053	-1	3
373719	CC1=CC=C(C=C1)S(=O)(=O)N2CCCSCC2	4793302	-1	3.10843
3005238	CCCCS/C(=C(/C#N)\C(=O)N)/C1=CC2=C(N1)CCCC2	4939337	-1	0.448753
392871	CC(C)(C)OC(=O)N1CCC(CC1)C(=O)O	4972297	-1	9
404519	CCOC(=O)CC1=NN=C(S1)NC(=O)C2=NC=NN2	5080870	-1	2.59349
408190	CCN(CC)CCNC1=C2C=CC(=CC2=NC=C1)Cl	5112297	-1	13.5281
448014	COC1=CC=C(C=C1)CNC(=O)NC2=NC=C(S2)[N+](=O)[O-]	5480043	-1	11.8393
460747	CC1=NN(C2=NC(=O)N(C(=O)C2=N1)C)C	5595615	1	3.36278
531389	COC(=O)C1CCCN1C(=O)C2=CC=CS2	6231253	-1	1.0551
531782	C1CC(OC1)CNC(=O)CC2=CC=CS2	6235422	1	3.11744
531782	C1CC(OC1)CNC(=O)CC2=CC=CS2	6235422	-1	3.11744
531782	C1CC(OC1)CNC(=O)CC2=CC=CS2	6235422	1	3.11744
531782	C1CC(OC1)CNC(=O)CC2=CC=CS2	6235422	-1	3.11744
531817	C1CCC(CC1)C(=O)NC2=CC=C(C=C2)F	6235807	-1	8.3299
531836	COC1=CC=CC(=C1)C(=O)NCC2CCCO2	6236016	-1	0.837209
531884	CC1=CC(=CC=C1)NC(=O)C2CCCC2	6236544	-1	3.9158
531888	COC1=CC(=C(C=C1)OC)NC(=O)C2CCCC2	6236588	-1	2.97302
531921	C1COCCN1C(=O)C2=CC=CS2	6236951	-1	0.476821
531922	C1CC(OC1)CNC(=O)C2=CC=CS2	6236962	-1	1.7669
531960	CC1=CC=CC(=C1)C(=O)NCC2CCCO2	6237380	-1	0.837209
531989	COC1=CC=C(C=C1)NC(=O)CC2=CC=CC=C2	6237699	-1	5.55396
531994	C1CC(OC1)CNC(=O)C2=CC(=CC=C2)Br	6237754	-1	0.837209
532046	COC1=CC(=C(C=C1)OC)NC(=O)CSC2=CC=CC=C2	6238326	-1	1.27869
532085	COCC(=O)NC1=C(C=CC(=C1)OC)OC	6238744	-1	4.2618
532088	COCC(=O)NC1=CC=CC2=CC=CC=C21	6238777	-1	3.29717
532095	CC(=CC(=O)NC1=CC=C(C=C1)Br)C	6238854	-1	11.8535
532276	COC1=CC=C(C=C1)C(=O)NC2=C(C=CC(=C2)OC)OC	6240801	-1	5.53439
532723	C1=CC=C2C=C(C=CC2=C1)OC(=O)C3=CC=CO3	6245509	-1	0.518248
532819	CC1=CC(=CC=C1)NC(=O)C2=CN=CC=C2	6246444	-1	5.27795
533807	CCOC(=O)COC1=C(C2=NSN=C2C=C1)Cl	6256179	-1	3.18056
534110	CCOC(=O)C1=C(N(N=N1)C2=NON=C2C3=CC=CC=C3)C	6259086	-1	0.927778
534121	CCN(CC)C(=O)C1=CC=CC=C1C(=O)OCC#C	6259205	-1	1.12821
534279	CC1(CC(=O)C(=CNCCO)C(=O)C1)C	6260729	-1	8.76
534281	C1CCC2=NC3=C(C4=C(S3)C(=CC=C4)O)C(=O)N2CC1	6260740	-1	0.718085
534287	CC1=C(SC2=C1C(=O)N3CCCCCC3=N2)C	6260782	-1	0.74717
534346	CC1N(C2CCCCCC2N1O)O	6261335	-1	0
534348	C1CCCN(CC1)C(=O)CC#N	6261357	-1	0
534382	CC1=C(C(C(=C(O1)N)C#N)C2=CC3=C(C=C2)OCO3)C(=O)OCC=C	6261626	-1	1.83333
534506	C1CCN(CC1)C2=NC3=NON=C3N=C2N	6262802	-1	3.14054
534510	CCCSC1=C(C2(CCCCC2)C(C(=O)N1)C#N)C#N	6262846	-1	0
534771	CC1(C2(CNCC1(CNC2)[N+](=O)[O-])[N+](=O)[O-])C	6265331	-1	0
534843	C1CCC2C(C1)N(C(N2O)C3=C(C(=C(C(=C3F)F)F)F)F)O	6266007	-1	0
535113	CCC(CC)(C#CCN1CCCCC1)OCCC#N	6268545	-1	0
535262	CC(C)COC1=CC=C(C=C1)C2C(=O)NC(=O)N2	6269958	-1	1.54674
535305	CC12CN3CC(C1=O)(CN(C2)C3C4=CN=CC=C4)C	6270390	-1	1.1265
535431	CC1=CC(=O)N2C(=C1C#N)SC3C2(CCCC3)O	6271574	-1	0.50512
535511	C1CCN(CC1)C2=NN3C(=NN=N3)C=C2	6272271	-1	0.390374
535662	C1COCCN1C(=O)CSCC(=O)NC2=CC=CC=C2	6273681	-1	8.36698
535704	CC1=CC(=NC(=N1)NC2=NNN=C2C(=O)C)C	6274045	-1	0.71141
5389011	CC1(N/C(=C/N=O)/CN1O)C	6274175	-1	1.04247
535721	CN1CCCC2=C1N=C3C(=C2)C(=CC(=O)O3)C(F)(F)F	6274197	-1	1.67963
535726	CN1CCN(CC1)CC(=O)NC2=C(OC3=CC=CC=C32)C(=O)C4CC4	6274228	-1	0
5285943	CCOC(=O)C1=C(NC(=O)NC1/C=C/C2=CC=CC=C2)C	6274464	-1	9.20664
535796	COC(=O)N1CN(CN(C1)C(=O)OC)C(=O)OC	6274922	-1	0.819414
535805	C1CCN(C1)S(=O)(=O)C2=CC=C(C=C2)N	6275019	-1	9.47857
535812	C1CCN(C1)C2=NN=C(N=N2)C3=CC=C(C=C3)Cl	6275085	-1	2.9751
535852	C1CN2CCC1C(C2)(C3=CC=C(C=C3)N)C4=CC=C(C=C4)N	6275490	-1	10
535994	C1COCCN1C2=NC3=NON=C3N4C2=NN=N4	6276746	-1	0.5
536157	CCCCN1CC(OC1=O)COC2=CC=CC=C2	6278196	-1	0
536254	CC(=O)CC(C)(C)S(=O)(=O)C1=CC=C(C=C1)NC(=O)C	6279088	-1	3.43137
536503	CC(C)C1CC(ON1)(C2(CCCCC2)O)O	6281607	-1	0
536700	CC(=O)N1CC2(CN(C1)CN(C2)C(=O)C)C(=O)C3=CC=C(C=C3)Br	6283452	-1	0.596078
536731	CCOC(=O)C(C(F)(F)F)(NC1=CC=C(C=C1)S(=O)(=O)NC2=NOC(=C2)C)NC(=O)C	6283789	-1	5.59243
1914872	CCCN1C/C(=C\C2=CC3=C(C=C2)OCO3)/C(=O)/C(=C\C4=CC5=C(C=C4)OCO5)/C1	6303448	-1	0.774704
538891	CC1=CC=C(C=C1)NC(=O)C(C(C(COC(=O)C)OC(=O)C)OC(=O)C)OC(=O)C	6304342	-1	9.27626
538892	CC1=CC=CC=C1NC(=O)C(C(C(COC(=O)C)OC(=O)C)OC(=O)C)OC(=O)C	6304353	-1	9.1702
539221	CCCCCOC1=CC=C(C=C1)C2C(=O)NC(=O)N2	6307491	-1	4.58921
539263	CC1=CC(=C(C=C1)NC(=O)C(C(C(COC(=O)C)OC(=O)C)OC(=O)C)OC(=O)C)C	6307873	-1	10.0713
539510	CC(=O)CSC1=NC2=CC=CC=C2O1	6310176	-1	0.923261
539513	CC(C)P(=O)(CC1=CC=CC(=C1)C#N)C(C)C	6310209	-1	0
539520	CC(=O)NC1=CC=C(C=C1)N2C=NN=N2	6310275	-1	7.23282
5363804	CCCCCCOC1=CC=C(C=C1)/C(=N/O)/N	6310663	-1	13.4954
539592	CCCC1C(C(C2(CC1(NC2=O)N)C#N)(C#N)C#N)C3=CC=C(C=C3)OC	6310972	-1	0
539683	CCCOCC1CC2(CC(OC2=O)(C)C3=CSC(=N3)N)C(=O)O1	6311796	-1	3.60996
539696	CCCC1CC(OC1=O)(C)C(=O)CN2C(=O)C=CC(=O)N2	6311904	-1	1.89321
539739	CC1=C(C(=NO1)C2=CC=CC=C2)C(=O)N3CCC4=CC=CC=C43	6312340	-1	1.47273
539910	CCOC(=O)C1=NON=C1NC(=O)C	6313975	-1	0.354839
540085	CC(=O)NC1=NN(C2(S1)CCCCC2)C(=O)C	6315622	-1	0
540218	CCOC(=O)C(C(F)(F)F)(NC(=O)C)N1CCOCC1	6316876	-1	2.49084
540289	CCOC(=O)C1=C(SC2=C1C=CC=C2NC(=O)C)N	6317544	-1	5.33157
540331	CC(=O)NC1=NC(=CS1)C=C(Cl)Cl	6317956	-1	1.88811
540360	CCC(C(=O)O)NS(=O)(=O)C1=CC=C(C=C1)NC(=O)C	6318192	-1	1.86364
540386	CC1=C(C(C(=C(O1)N)C#N)C2=CC=CO2)C(=O)C	6318456	-1	0.932333
540392	CC(=O)NC1=NON=C1C2=NC3=CC=CC=C3N2N(C(=O)C)C(=O)C	6318500	-1	1.20126
540424	CC1=CC(=C(C=C1C(=O)C)F)N2CCCC2	6318817	-1	1.37931
540501	CC1=C2C(C(C(CC2=NO1)(C)O)C(=O)C)C3=CC=CO3	6319558	-1	2.42531
540540	CC(=O)N=C1N(C2=NC3=CC=CC=C3N=C2S1)N(C(=O)C)C(=O)C	6319952	-1	1.83331
540689	CC(=O)OC1=CC=CC=C1N2C(=O)C3=C(C2=O)C=C(C=C3)C(=O)O	6321412	-1	4.88707
540880	CC(=O)NC(C(=O)OC)(C(F)(F)F)NC1=NC=C(C=C1)Br	6323266	-1	1.58461
541138	CC1=C(C(=NO1)C2=CC=CC=C2Cl)C(=O)N3CCC(CC3)C(=O)OC	6325667	-1	3.89614
541175	CCOC1=CC2=C(C=C1)N=C(S2)NC(C(=O)OC)(C(F)(F)F)NC(=O)C	6326021	-1	11.3627
541532	CN(C)C=NC1=NC=C2C3=CC=CC=C3NC2=C1C#N	6329368	-1	0.290323
541603	CN(C)P1(=NC(=NC(=N1)C(F)(F)F)C(F)(F)F)N(C)C	6330034	-1	1.05177
541702	C1C2CC3(CC1CC(C2)(C3)CC(=O)N)CC(=O)N	6330922	-1	0
541823	CC(C)OC(=O)C1=CC2=CC=CC=C2OC1=O	6332023	-1	4.98543
541928	CN(C)S(=O)(=O)C1=CC=CC2=NSN=C21	6333105	-1	0.410958
542029	CC(=O)NC(C1=CC=CC=C1)C2=CN=CC=C2	6334132	-1	1.30021
542822	C1=CC=C(C=C1)C2=NN(C(=C2)C#N)C3=CC=CC=C3	6341784	-1	0
542857	CCS(=O)(=O)NC1=CC=C(C=C1)CC2=CC=NC=C2	6342134	-1	6.06677
542899	C1=CC(=CC=C1C2=NC3=C(O2)C=C(C=C3)N)N	6342414	-1	8.23746
604704	C1CC(=O)N(C1=O)C2=CC=C(C=C2)CSC3=NC4=CC=CC=C4N3	6935341	-1	1.82854
607843	C1CCCC2=C(CC1)C(=O)C3=CC=CC=C3N2	6964863	-1	0.561798
615754	COC1=CC2=CC(=C(N=C2C=C1OC)N)C(=O)NC3=CC=CC=C3	7039628	-1	11.9273
644354	C1=CC=C2C(=C1)C(=CN2)C3=CC=NC=C3	7302432	-1	0.374527
644740	CC1=CC(=NC=C1)NC2=NC(=CS2)C3=C(N=C4N3C=CS4)C	7306368	-1	0.273775
646520	CC1=C(C2=NC3=CC=CC=C3N2C(=C1)N4CCN(CC4)C5=CC=CC=N5)C#N	7324645	-1	1.12959
647145	CC1=CC=CN2C1=NC3=C(C2=O)C=C(C(=N)N3CCC4=CC=CC=C4)C(=O)NCC5=CC=CO5	7331056	-1	0.353933
647833	C1=CC(=NC=C1Br)NC(=O)CCC(=O)O	7338169	-1	4.02536
1893668	CCN\1C2=C(C=CC(=C2)OC)S/C1=C\C(=O)C	7339767	-1	0
648959	CC1=CC=C(O1)C2=NOC(=N2)C3CCN(CC3)C(=O)NC4=CC=C(C=C4)C#N	7349749	-1	7.29167
649157	CCNC1=NC(=NC(=N1)OC)OC2=NN(C(=O)C=C2)C3=CC=CC=C3	7351736	-1	2.73054
649672	CCOC1=CC2=C(C=C1)NC(=O)C(=C2)CN(CCC3=CC=CC=C3)C(=O)C4=NC=CN=C4	7357097	-1	0.375309
650864	COC(=O)C1CCCN1S(=O)(=O)C2=CC3=CC=CC=C3C=C2	7369340	-1	1.43138
651524	COC1=CC=CC=C1N(CC(=O)N2CCCCC2)S(=O)(=O)C3=CC=CC=C3	7376165	-1	0.518987
651603	C1=CC=C2C(=C1)C=C(C=N2)NC(=O)C3=CC(=CC=C3)N4C=NN=N4	7376997	-1	4.56058
652987	CS(=O)(=O)CC1=NC2=CC=CC=C2OC1=O	7391233	-1	0
653477	CC(C)OC(=O)CSC1=NN=C(N1C)CNC2=NC(=CS2)C3=CC=CC=C3	7396384	-1	0
654210	CCC1=CC2=C(C=C1)NC=C(C2=O)C(=O)OCCOC	7403839	-1	3.20043
656272	CC1=CC=C(C=C1)C2=C(C3=NC4=C(CCCC4)C(=O)N3N2)C	7425022	-1	0
657356	C1CN(CCC1=C(C2=CC=C(C=C2)F)C3=CC=C(C=C3)F)CCN4C(=O)C5=CC=CC=C5NC4=S	7434021	-1	6
657356	C1CN(CCC1=C(C2=CC=C(C=C2)F)C3=CC=C(C=C3)F)CCN4C(=O)C5=CC=CC=C5NC4=S	7434021	1	6
657356	C1CN(CCC1=C(C2=CC=C(C=C2)F)C3=CC=C(C=C3)F)CCN4C(=O)C5=CC=CC=C5NC4=S	7434021	-1	6
657356	C1CN(CCC1=C(C2=CC=C(C=C2)F)C3=CC=C(C=C3)F)CCN4C(=O)C5=CC=CC=C5NC4=S	7434021	1	6
657581	CN(C)CC1=C(C=CC2=C1C=C(O2)CC3=CC=CC=C3)O	7436177	-1	5.44192
657640	CC1=CC(=O)N=C(N1)N2C(=CC(=N2)C)C	7436758	-1	0
658095	CN1C2=C(C(=O)N(C1=O)C)N(C(=N2)OC3=CC=CC=C3)CC4=CC(=CC=C4)OC	7441378	-1	2.83751
658464	COC1=C(C=C2C(=C1)C(=CC(=C2CC(=O)NC3=CC=CC=C3)O)N4CCOCC4)OC	7445130	-1	6.35371
658865	CC1(CC2=C3C(=NC(=C2CO1)N4CCOCC4)SN=C3Br)C	7449122	-1	0
5389110	CC(CC/C=C(\C)/CCC=C(C)C)NCCN1CCNCC1	7451749	-1	0
659572	CCN1C=C(C(=O)C2=CC(=C(C=C21)N3CCCCC3)F)C(=O)OCC	7456425	-1	10.2791
659868	CC1=CC=C(C=C1)N2C(=O)C3=C(C2=O)SC4=NN=C(C(=O)N34)C	7459285	-1	0
659917	CCCCNC1=NC(=NC(=C1)C)NCC2=CC=CC=C2	7459756	-1	9.64445
659917	CCCCNC1=NC(=NC(=C1)C)NCC2=CC=CC=C2	7459756	1	9.64445
659917	CCCCNC1=NC(=NC(=C1)C)NCC2=CC=CC=C2	7459756	-1	9.64445
659917	CCCCNC1=NC(=NC(=C1)C)NCC2=CC=CC=C2	7459756	1	9.64445
660337	CC1=C(C2=NC3=CC=CC=C3N2C(=C1)N4CCN(CC4)C5CCCC5)C#N	7464028	-1	0.434298
5929103	CCOC(=O)C1=C(N2C(=C(C1C3=CN=CC=C3)C(=O)OC)S/C(=C\C4=CN=CC=C4)/C2=O)N	7470195	-1	12.0626
660996	CC1=NC2=NC=NN2C(=C1)NC3=CC4=CC=CC=C4C=C3	7470765	-1	0.763865
661075	COC1=CC(=CC=C1)OCCN2CCN(CC2)C3=NC=NC4=C3C=NN4C5=CC=CC=C5	7471602	-1	1.27586
661700	C1COCCN1CCCNC2=NC=NC3=C2NC4=C3C=C(C=C4)Cl	7478193	-1	4.86329
662547	C1CN(CCN1C2=CC=CC=C2)S(=O)(=O)C3=CC=C(S3)Br	7486579	-1	1.80795
6890606	CC1=CC2=C(C=C1C)N(C=N2)/N=C/C3=CN=CC=C3	7488030	-1	0.305243
663995	COC1=CC2=C(C=C1)NC3=C2N=CN=C3NCCN4CCCCC4	7501042	-1	2.375
664284	CCN1CCCC1CNC2=NC=NC3=C2NC4=C3C=C(C=C4)F	7503943	-1	4.38403
664853	CCN1CCCC1CNC2=NC=NC3=C2NC4=C3C=C(C=C4)Cl	7509641	-1	2.65454
665991	CCCN1C2=C(C=C3C=CC=C(C3=N2)C)C(=N1)NS(=O)(=O)C	7521346	-1	3.04088
666034	CC1=CC=C(O1)C2CC(=O)N3CN(CSC3=C2C#N)C4=CC=C(C=C4)Br	7521780	-1	0
666359	CCOC1=C(C=C(C=C1)C2=NOC(=N2)C3=CC=NC=C3)OCC	7525064	-1	1.07892
666418	CCCC1=NC=CC(=C1)C(=S)N	7525657	-1	8.91684
666425	CN1C2=C(C(=O)NC1=O)N(C(=N2)N(C)CC3=CC=CC=C3)CCCSC4=NC=CC=N4	7525732	-1	1.26524
666965	C1=CC=C(C=C1)C2=NOC(=N2)CCCC(=O)NCC3=CN=CC=C3	7531031	-1	1.24482
2962002	CSC1=NC(=NC(=C1C#N)SC2CCCC=C2)N	7540826	-1	4.26274
2837663	CC(C)(C(COC1=CC=CC2=C1N(C(=O)C=C2OC)C)O)O	7598493	-1	1.34615
673609	CCOC1=CC=C(C=C1)C(=O)N2CCN(CC2)CC3=CC=CC=C3	7600018	-1	0
678644	CN1C(N(C2=CC=CC=C21)C)C3=CC4=C(C=C3)OCO4	7652512	-1	4.53764
692799	CC(C)C1=CC=C(C=C1)NC2=NC(=NC(=N2)OC)OC	7793807	-1	0
3129754	C1=CC=C2C(=C1)C3=C(C2=O)C(SC4=CC=CC=C4N3)C5=CC=CO5	7817452	-1	3.8677
707153	CCOC(=O)C1=CNC2=C(C1=O)C=CC3=C2CCCC3	7939349	-1	2.90489
713715	CCOC(=O)C1=C(N(N=N1)C2=NON=C2N)C3=CC=C(C=C3)OC	8006924	-1	0.51087
3136668	CCC1=CC2=C(C=C1)NC(=O)C23NN=C(S3)C4=CC=C(C=C4)C	8134456	-1	0.316456
738805	CC1=CC(=CC=C1)NC(=O)/C(=C/C2=CC=C(O2)C)/C#N	8266096	-1	4.46941
760357	CCCN1C2=CC=CC=C2N=C1CNC3=CC=CC=C3O	8483753	-1	4.16282
761228	CC1=NC(=CC=C1)NC(=O)C2=NC3=CC=CC=C3C=C2	8491422	-1	2.1861
761910	C1CN2C(=O)C3=CC=CC=C3N=C2N1CC4=CC=C(C=C4)Cl	8497911	-1	3.76271
762642	C1CN(CCN1C2=CC=CC=N2)C(=O)CC3=CC=CS3	8504907	-1	1.36667
766691	CCOC(=O)C1=C(N=C2C3=CC=CC=C3OC(=O)C2=C1C)C	8546738	-1	2.94536
767898	CCN(CC)S(=O)(=O)C1=C(C=CC(=C1)C(=O)O)Cl	8558954	-1	3.46467
778306	C1=CC2=C(N=C1)N=C(N2)SCC3=CC=C(C=C3)F	8660799	-1	2.55704
2870379	CC(C)(C)C1CCC2=C(C1)C(=O)C3=CC=CC=C3N2	8668382	-1	0.50505
784625	C1=CC=C(C(=C1)C2=CC=C(O2)C(=O)O)Cl	8725933	-1	2.60355
803154	COC1=CC=CC=C1CC(=O)NC2=CC(=CC(=C2)OC)OC	8915763	-1	3.19201
819041	CC1=CC=C(C=C1)C2=CC3=NC4=C(CCCC4)C(=O)N3N2	9064177	-1	0
854771	CCOC1=CC=C(C=C1)C(=O)NC2=C(C=CC(=C2)OC)OC	9428251	-1	4.8137
867936	CC1=CC(=NC(=N1)N2C(=CC(=N2)C)NC3=CC=CC=C3)C	9557306	-1	2.19197
879239	CC1CCN(CC1)C2=NC(=NC(=C2)C)N3C(=CC(=N3)C)C	9672105	-1	0.758401
881551	CCCN1C2=CC=CC=C2N=C1C3=CC(=CC=C3)Br	9696577	-1	2.05239
890908	C1CSC(=N1)SCNC(=O)C2=CC=CC=C2	9796059	-1	0
893627	CCCN1N=C(N=N1)NC(=O)COC2=CC=C(C=C2)C3CCCCC3	9825596	-1	0
901734	CC1=CC(=NC2=CC3=C(C=C12)N(CC3)C(=O)C)C	9911978	-1	2.22586
935473	CC1(CN=C(S1)NCC2=CC=CC=C2Cl)C	10214176	-1	2.85435
962627	C1CCN(C1)C2=C3C=CC(=CC3=NC=C2)Cl	10451298	-1	7.06028
987449	CCC1=CC=C(C=C1)N2C(=C(C3=NC4=CC=CC=C4N=C32)C(=O)OCC)N	10692118	-1	0.99357
1077226	C1CC2=C(C3=NC4=CC=CC=C4N3C(=C2C1)N5CCN(CC5)C6=CC=CC=N6)C#N	11521247	-1	1.08748
1080944	CC1=NN=C(N1C2=CC=C(C=C2)F)SCC(=O)NCC3=CC=CO3	11559318	-1	1.61468
1096075	CCNC1=NC(=NC(=N1)N2CCCC2)NC(C)(C)C	11714539	-1	7.92989
1116028	CC1=CC2=C(C=C1)N(C(C3=C2C(=S)SS3)(C)C)C(=O)C4=CC=CO4	11916293	-1	0.850482
7433640	CCOC(=O)C1=CC2=C(C=C1)N[C@H]([C@@H]3[C@H]2C=CC3)C4=C(C(=CC=C4)OC)OC	12061547	-1	2.28158
1157568	CCN1CCN(CC1)C(=O)NC2=CC=C(C=C2)CC3=CC=C(C=C3)NC(=O)N4CCN(CC4)CC	12326593	-1	4.72925
1167735	CC1=CC=C(C=C1)C2=NN=C(O2)SCC(=O)N3C4=C(C=C(C=C4)OC)C(=CC3(C)C)C	12429120	-1	0
1204323	CSC1=C(N=C(O1)C2=CC=CC=C2)C(=O)N	12767425	-1	0
1258612	C1CCCN(CC1)S(=O)(=O)NC2=CC=C(C=C2)F	13305067	-1	1.86909
1300515	COC1=CC=C(C=C1)OCC(=O)NC2=NC(=CC=C2)NC(=O)COC3=CC=C(C=C3)OC	13733778	-1	5.37001
1316619	C1COCCN1CC2=CC=C(C=C2)NC(=O)C3=CC=C(O3)C4=CC=C(C=C4)Br	13903578	-1	15.7479
1316619	C1COCCN1CC2=CC=C(C=C2)NC(=O)C3=CC=C(O3)C4=CC=C(C=C4)Br	13903578	1	15.7479
1316619	C1COCCN1CC2=CC=C(C=C2)NC(=O)C3=CC=C(O3)C4=CC=C(C=C4)Br	13903578	-1	15.7479
1316619	C1COCCN1CC2=CC=C(C=C2)NC(=O)C3=CC=C(O3)C4=CC=C(C=C4)Br	13903578	1	15.7479
1334105	CC1=CC2=C(C=C1)OC(=N2)C3=C(C=CC(=C3)NC(=O)CC4=CC=CC=C4)Cl	14087517	-1	3.49514
1380879	C1=CC=NC(=C1)NC2=NC3=C(C=CC=C3O)C=C2	14553430	1	10.225
1383795	CC1=CC=C(C=C1)C2=C3C=C(C(=O)N=C3N(N2)C4=CC=CC=C4)CNCC5=CC=CC=C5	14580013	-1	0
3826960	CCOC(=O)C1=CC=C(C=C1)N2C(C3=C(NN=C3C2=O)C)C4=CC=CC=C4OC	14709073	-1	2.49849
1419129	C(CC(=O)O)C1=NNC(=S)NC1=O	14859836	-1	0.90566
1521357	CCOC(=O)C1=C(N(N=N1)C2=NON=C2N3C=CC=C3)CN4CCCCC4	15891413	-1	0.384615
2909142	CC1=C(C(N2C(=O)CCSC2=N1)C3=CC=C(C=C3)OC(=O)C4=CC=CO4)C(=O)OCC=C	16667728	-1	5.49744
1630270	CC1=C(C(=CC(=C1)C(C)(C)C)S(=O)(=O)NCCO)C	16757244	-1	2.30929
4894947	COC1=C(C2=CC=CC=C2C=C1)C3CC(=O)N4CN(CSC4=C3C#N)CC5=CC=CO5	19361088	-1	0
2135090	CCOC1=CC=C(C=C1)S(=O)(=O)C2=CN(C3=C(C2=O)C=C(C=C3)OC)CC4=CC=CC=C4C	20784293	-1	0
2174924	CCCCOC1=CC=C(C=C1)NC2=NC3(CCCC3)N=C(N2)N	21132279	-1	1.71428
2192323	C1=CC=C2C(=C1)NC(=N2)C3=CC(=CC=C3)NC(=O)C4=CC(=CC=C4)NC(=O)C5=CC=CO5	21299080	Inconclusive	5.3695
2192323	C1=CC=C2C(=C1)NC(=N2)C3=CC(=CC=C3)NC(=O)C4=CC(=CC=C4)NC(=O)C5=CC=CO5	21299080	-1	5.3695
2239735	CC1=CC=CC=C1OCC2=NN=C(N2CC=C)SCC(=O)O	21753961	-1	1.01887
2767330	CC1=CC=C(C=C1)C2=NN=C3C4=CC=CC=C4C(=O)C3=C2	26550708	-1	4.59574
5711811	COC1=C(C=CC(=C1)/C=C(\C#N)/C2=NC3=CC=CC=C3N2)OCC4=CC=CC=C4F	26811412	-1	4.00198
2794188	CCN1C=NC2=C1N=C(N=C2NC3=CC(=CC=C3)Cl)N[C@@H]4CCCC[C@@H]4N	26822385	1	15.2036
2857612	C1CC2=C(C1)N(C3=C(C2=N)CCC3)CC4=CC=C(C=C4)F	27479093	-1	1.69737
2899073	CC1=CC=C(C=C1)C(=O)NCCNC(=O)CN2CCOCC2	27915514	-1	0.783784
2932546	C1CCN(C1)CC(=O)NC2=CC=C(C=C2)C3=NC4=C(O3)C=CC(=C4)NC(=O)CN5CCCC5	28276133	-1	2.32304
2983872	CC1=C(C=C(C=C1)Cl)N2CCN(CC2)S(=O)(=O)C3=CC4=C(C=C3)N(C(=O)O4)C	28821930	-1	2.01682
2999531	CC1CCN(CC1)C2=NN=CC3=CC=CC=C32	28991270	-1	0.366743
3119592	C1COCCN1C2=NC(=NC(=N2)NN)NCC3=CC=CC=C3	30125680	-1	4.77888
3235634	COC1=CC=CC=C1CNC(=O)CCN2C(=O)C3=C(C=CS3)NC2=O	31359936	-1	0.548936
3236093	C1CCCN(CC1)S(=O)(=O)C2=C3C(=CC(=C2)Br)CCN3C(=O)C4CC4	31364831	-1	0
3237206	CCOC(=O)N1CCC(CC1)NC(=O)CSCC2=C(OC(=N2)C3=CC(=CC=C3)OC)C	31376537	-1	4.04713
3237215	CCCN(CCC)S(=O)(=O)C1=C2C(=CC(=C1)Br)CCN2C(=O)CC	31376625	-1	0.50505
3238076	CC1CCCCC1NC(=O)CN2C(=O)COC3=C2C=C(C=C3)C	31385735	-1	0.408163
3238132	CC1=CC(=NO1)C(=O)NC2=CN(N=C2)CC3=C(C=C(C=C3)Cl)Cl	31386312	-1	1.68116
3238689	CCOC(=O)CCCCC(=O)C1=C(NC(=O)N1)CN2C=CN=C2	31392152	-1	1.83333
3238952	C1CN(CCN1CC(=O)NC2=C(C=CC(=C2)C(F)(F)F)Cl)C(=O)C3=CC=CO3	31394985	-1	7.89771
3239053	CC1=CC=CC=C1CN2C=C(C=N2)NC(=O)C3=NOC(=C3)C4=CC=CS4	31396077	-1	0.568914
3239170	CCN1CCN(CC1)C2=NC3=C(C=C(C=C3)NC(=O)C4=CC(=CN=C4)Br)C(=C2)C	31397290	-1	3
3239413	C1=CC(=CC=C1CC(C(=O)O)N2C(=O)C3=C(C2=O)C=C(C=C3)C(=O)O)O	31399863	-1	8.42303
3239482	CC(C)N1CCC(=CC1)C2=CNC3=CC=CC=C32	31400603	-1	0
3239537	C1CCN(CC1)C2CCN(CC2)C(=O)NC3=CC=CC=C3C(F)(F)F	31401191	-1	0
3239565	COC1=C(C=C(C=C1)C2=CC(=NO2)C(=O)NCC3=CN=CC=C3)OC	31401488	-1	1.94932
3239831	C1=CC=C(C(=C1)NC(=O)C2=CC=C(C=C2)Cl)O	31404340	-1	10.0885
3240248	CCCN1C=C(C2=CC=CC=C21)SCC(=O)NCC3=CC=CO3	31408811	-1	0
3240382	CC(C)C(C(=O)NC1=CC=NC=C1)NC(=O)C2CCCCC2	31410257	-1	1.47219
3240484	COC1=C(C=C2C(=C1)C3=NC(=NN3C(=N2)NCCN4CCOCC4)C5=CC=CC=C5)OC	31411355	-1	7.68627
3240925	CC1=CC(=NC2=C1C=C(C=C2)NC(=O)C3=CC=C(O3)Br)N4CCN(CC4)C	31416061	-1	3.12749
3241156	CCOC(=O)N1CCN(CC1)C(=O)C(C(C)C)NC(=O)C2CCC(CC2)C	31418513	-1	4.34605
3244587	CC1=C(C(=CC=C1)C)NC(=O)N2CCN(CC2)C3CCCCC3	31454876	-1	4.91288
3245435	C1CCC(CC1)NC(=O)C2=NOC3=C2CCCCC3	31463801	-1	0
3245617	CC1=NC2=NN=NN2C(=C1)NC3=CC=C(C=C3)Cl	31465775	-1	5.56972
3246775	CCN(CC)C(=O)COC1=CC=C(C=C1)C2=NN=C(C3=CC=CC=C32)N4CCCCC4	31477390	-1	1.82609
3385203	C1=CC=C(C=C1)C2=NNC3=C2OC4=CC=CC=C43	32920360	-1	0.724706
3486689	CC(C)N(C1CCN(CC1)C(=O)C)C(=O)NC2=C(C=CC=C2F)F	33974909	-1	3.16532
3497231	CCOC(=O)C1=C(N(C2=C1C=C(C=C2)OC(=O)C3=CC=CC=C3NC(=O)C(C)C)C4=CC=CC=C4)C	34084255	-1	4.77358
3596182	CCCCSC1=NC=NC2=C1C(=CN2C3=CC(=CC=C3)F)C4=CC=CC=C4	35114444	-1	1.60458
3641059	CCCCC1=C(NC2=NC=CN=C12)C3=CC=C(C=C3)OC	35581276	-1	0
3642305	CC(C1=CC=C(C=C1)C(=O)C2=CC=CS2)C(=O)OC	35594347	-1	1.39108
3899541	C1=C2C(=CC(=C1[N+](=O)[O-])[N+](=O)[O-])NC(=O)C(=O)N2	38275837	-1	13.4607
4018928	CCN1CCC(C1)CNC(=O)C2=C(C=CC(=C2)S(=O)(=O)N)OC	39506067	-1	0
4132227	CC1=CC(=CC=C1)N2C=CN=C2SCC(=O)NC3=C(C=CC(=C3)C(F)(F)F)Cl	40688360	-1	7.08468
4155347	CC(C)N1C=NC2=C1N=C(N=C2NCC3=CC=CC=C3O)NCCCO	40931719	-1	7.26014
4284640	CC(C)OC(=O)C1=C(N=CC=C1)SCC(=O)NC2=C(C=C(C=C2)C(F)(F)F)Cl	42276927	-1	5.84867
4324719	CCOC(=O)C1=C(N(C(=C1)C2=CC=C(C=C2)OC)CCC(=O)NCC3=CC=C(C=C3)OC)C	42693019	-1	1.07678
4532371	CCCCN(CC)C(=O)CSC1=NC2=CC=CC=C2C(=O)N1CC3=CC=CO3	44842583	-1	0
4565464	CCOC(=O)C1=C(N(C(=C1)C2=CC=C(C=C2)OC)CCC(=O)NC3=CC=CC(=C3)C(=O)C)C	45186201	-1	6.83866
4994807	CCOC(=O)C1=CC(=CC=C1)NC(=O)CCN2C(=C(C=C2C3=CC=C(C=C3)F)C(=O)OCC)C	49699835	-1	2.52557
5005498	C1C2=C(C3=CC=CC=C3NC1=O)NC4=C2C=C(C=C4)[N+](=O)[O-]	49812175	-1	20.2857
5044333	C1CCCC(CC1)NS(=O)(=O)C2=CC(=C(C=C2)F)C(=O)NC3=CC=C(C=C3)C(F)(F)F	50214581	-1	7.28695
5074543	C1=CC=C2C(=C1)C3=NC(C(=O)N3C(=N2)SCC4=CC(=CC=C4)F)CC(=O)NCC5=CC=CS5	50531101	-1	2.37766
6857762	C1=CC=C(C=C1)/C=C/C(=O)C2=C(C=C(C=C2)O[C@H]3[C@@H]([C@H]([C@@H]([C@H](O3)CO)O)O)O)O	52236143	-1	10.1525
5280443	C1=CC(=CC=C1C2=CC(=O)C3=C(C=C(C=C3O2)O)O)O	52615785	-1	8.47074
5280951	CC1=C2C(=C3C=CC(=CC3=N2)OC)CCN1	52619462	-1	0
5281404	CC1=NC=CC2=C1NC3=CC=CC=C23	52622763	-1	0.893204
5282150	C[C@H]1[C@@H]([C@H]([C@H]([C@@H](O1)O[C@@H]2[C@H]([C@@H]([C@H](O[C@H]2OC3=CC(=C4C(=C3)OC(=CC4=O)C5=CC=C(C=C5)O)O)CO)O)O)O)O)O	52629015	-1	19.5932
5289419	COC1=CC\2=C(C=C1)NC(=O)/C2=C\C3=CN=CN3	52695247	-1	10.0822
5307102	CC1=C(C=CC(=C1)NC2=CC(=NC3=NC(=NN23)C)C)Br	52865366	-1	6.37515
5307635	CCN1C=C(C(=O)C2=C1C=CC(=C2)S(=O)(=O)N(C)C)C(=O)NCCC3=CCCCC3	52870911	-1	1.27321
5307801	CC1=NC2=NC(=NN2C(=C1)NC3=CC=C(C=C3)Br)C	52872632	-1	6.73711
5307851	COCCN1CC2=CC=CC(=C2C1=O)C(=O)NC3=CC4=C(C=C3)OCCO4	52873160	-1	4.83537
5308023	C1CCN(CC1)C2=NC3=C(S2)C=C(C=C3)C(=O)N4CCN(CC4)CC5=CC6=C(C=C5)OCO6	52874991	-1	2.73913
5308127	CC1=C(C=C(C=C1)NC2=CC(=NC3=NC(=NN23)C)C)C	52876089	-1	3.85041
5308471	CCC1=CC=C(C=C1)NC2=CC(=NC3=NC(=NN23)C)C	52879740	-1	0.336735
5308815	CC1=CC(=CC(=C1)NC2=CC(=NC3=NC(=NN23)C)C)C	52883421	-1	1.77049
5318433	C1=CC=C2C(=C1)/C(=C/3\C(=O)C4=CC=CC=C4N3)/C(=O)N2	52973728	-1	0
5326843	CCCCC1=C2C(=NC=CN2)NC1=C3C=CC(=O)C=C3	53051187	-1	0
5329468	COC1=CC=C(C=C1)C2=CN3C(=C(C=N3)C4=CSC=C4)N=C2	53078456	-1	0
5330548	CCCC(=O)OC1=CC2=C(C=C1)NC(=C2)C(=O)C3=CC4=CC=CC=C4N3	53090328	-1	6.34124
5353940	C1=CC(=O)C=CC1=C2NC(=C(N2)C3=CC=NC=C3)C4=CC=C(C=C4)F	53336523	-1	3.96748
5359476	C1=CC=NC(=C1)NS(=O)(=O)C2=CC=C(C=C2)N/N=C\3/C=CC(=O)C(=C3)C(=O)O	53336699	-1	52.1304
6261800	CCCCCN=C(N)NN/C=C\1/C=NC2=C1C=C(C=C2)OC	53399719	-1	6.42032
5367179	CC1(CC(=NC2=NONC2=N1)C3=CC=CC=C3)C4=CC=CC=C4	53444136	-1	0
5389156	CC\1=CC(=O)C=C/C1=C/2\C=NC3=CC=CC=C3N2	53643331	-1	0
5389935	COC1=CC2=C(C=C1)NC(=O)C23N=C4C=CC=CC4=C5N3C6=CC=CC=C6N5	53651657	-1	1.99351
5474706	CC1=C2C(=C3C=C(C=CC3=N2)OC)CCN1	54359561	-1	0
5742535	CC1=C2C(C3=C(CC(CC3=O)(C)C)N=C2NN1)C4=CC=C(C=C4)OC	54687521	-1	0
5711842	CC1=CC(=C(C=C1)C)OC2=C(OC3=C(C2=O)C=CC(=C3CN4CCN(CC4)C)O)C(F)(F)F	55518646	-1	0
5740866	C1=CC=C2C(=C1)C3(C(=O)N2)N=C4C=CC=CC4=C5N3C6=CC=CC=C6N5	55802258	-1	3.06799
6324540	CC1=C2C=CC(=O)C=C2NC(=C1)N3CCC(CC3)N(C)C4CCCC4	59922439	-1	1.44193
16667695	C[C@H]1CC[C@]2(C[C@@H]3C[C@H](O2)C/C=C(/[C@H]([C@H](/C=C/C=C/4\CO[C@H]\5[C@@]4([C@@H](C=C(/C5=N/O)C)C(=O)O3)O)C)OC6C[C@@H](C([C@@H](O6)C)O)OC)\C)O[C@@H]1C7CCCCC7	60790690	-1	24.9553
6539732	C1=CC(=CC(=C1)I)CSC2=NN=C(O2)C3=CC=NC=C3	61673909	-1	0.272464
6604471	CC(C)SC1=CC2=C(C=C1)N=C(N2)NC(=O)OC	62009398	-1	16.8971
7693819	COC1=C(C=C(C=C1)C2=NON=C2NC(=O)C3=CC(=C(C=C3)OC)Cl)OC	72833491	-1	6.1771
9541634	CC1=C(C2=C(O1)C3=CC=CC=C3C(=C2)NS(=O)(=O)C4=CC=C(C=C4)F)C(=O)OCC5=CC=CC=C5	92713987	-1	7.30435
9549289	C1=CC(=CC(=C1)N)C2=CC3=C(N2)N=CN=C3OC4=CC=CC(=C4)O	92795825	-1	5.96451
9550693	CCN1CCN(CC1)C2=NC3=C(C=C(C=C3)NC(=O)C4=CC(=C(C=C4)OC)OC)C(=C2)C	92811071	-1	2
9843206	COC1=C(C=C2C(=C1)C(=NC=N2)NC3=CC=C(C=C3)OCC4=CC=CC=C4)OC	95086637	-1	9.6
9860529	C1COCCN1C2=CC(=O)C3=C(O2)C4=CC=CC=C4C=C3	95272172	-1	3.40406
10938773	COC1=CC(=CC(=C1OC)OC)C(=O)NC2=CC3=C(C=C2)N=C4CCCCCN4C3=O	106867865	-1	13.5692
15987793	CCN(CC)C1=NC2=C(C=C(C=C2)NC(=O)C3=CC(=CC=C3)OC)C(=C1)C	130273337	-1	6.55374
15989993	CCOC(=O)C1=CC=C(C=C1)NC2=NC3=CC(=C(C=C3C(=N2)N)OC)OC	130297400	-1	12.4731
15990000	CC1=C(C=C(C=C1)NC2=C(C(=O)C3=CC=CC=C32)C4=CC=C(C=C4)C(F)(F)F)F	130297477	-1	5.4117
15990007	CCC1=NN2C(=CC(=NC2=N1)C)NC3=CC(=C(C=C3)F)Cl	130297554	-1	5.32468
15990032	CC1=CC(=C(C=C1)C)NC2=C(C(=O)C3=CC=CC=C32)C4=CC=C(C=C4)C(F)(F)F	130297829	-1	6.11257
15990040	COC1=CC=C(C=C1)NC2=C(C(=O)C3=CC=CC=C32)C4=CC=C(C=C4)C(F)(F)F	130297917	-1	3.03945
15990081	COC1=C(C=C2C(=C1)C(=NC(=N2)NC3=CC(=CC=C3)F)N)OC	130298368	-1	16
15990083	COC1=C(C=C2C(=C1)C(=NC(=N2)NC3=CC=C(C=C3)F)N)OC	130298390	-1	16
15990148	CC1=C(C(=CC=C1)N2CCN(CC2)C3=NC4=CC=CC=C4C5=NN=C(N53)C)C	130299094	-1	0.851282
15990165	CC1=C(C=C(C=C1)NC2=C(C(=O)C3=CC=CC=C32)C4=CC=C(C=C4)OC)C	130299281	-1	6.61634
15990196	CC1=CC(=CC(=C1)NC2=C(C(=O)C3=CC=CC=C32)C4=CC=CC=C4)C	130299622	-1	6.44456
15990233	CC1=C(C=CC(=C1)NC2=C(C(=O)C3=CC=CC=C32)C4=CC=C(C=C4)OC)Br	130300029	-1	1.11555
15990445	CN1C2=CC=CC=C2C3=C1C(=O)N(C=C3C(=O)N(C)C4=CC(=C(C=C4OC)OC)Cl)C5CCCC5	130302361	-1	0.697937
16008681	CC1=CC(=C(C=C1)OC)N2C3=C(C=C2C4=CC=C(C=C4)Cl)C(=O)CC(C3)(C)C	130500782	-1	1.78917
16010874	COCCCNC1=NC2=CC(=C(C=C2C3=NC(=NN31)C4=CC=CC=C4)OC)OC	130524865	-1	3.72584
16010878	CCOCCCNC1=NC2=CC(=C(C=C2C3=NC(=NN31)C4=CC=CC=C4)OC)OC	130524909	-1	3.19885
16011596	COC1=CC=CC=C1CNC(=O)CN2C3=CC=CC=C3OC4=C(C2=O)C=CC=N4	130532789	-1	2.33579
16011601	CCOC(=O)CN1C2=C(N=CC=C2)SC3=CC=CC=C3C1=O	130532844	-1	0.627265
16011710	CC(=O)N1C(CC2=CC=CC=C21)C(=O)NCC3=CC(=CC=C3)Cl	130534043	-1	2.54735
16011712	COC1=C(C=C(C=C1)NC(=O)NCC2=CC=CN2CC3=CC=C(C=C3)F)OC	130534065	-1	4.4899
16011726	CC1=C2C=NN(C(=O)C2=C(N1CC3=CC(=CC=C3)Cl)C)CC(=O)O	130534217	-1	0.838171
16011897	COC1=CC=CC=C1NC(=O)C2=C(N(N=C2)C3=CC=CC=C3)N4C=CC=C4	130536078	-1	0.802234
16011962	CC1=CC=C(C=C1)CN2C3=C(C=CN=C3)N=C2SCC4=CC=C(C=C4)C(=O)NCCC5=CC=CC=C5	130536793	-1	0.426667
16012428	CCCN(C1=CC=C(C=C1)OCC)C(=O)C(=O)NC2=CC3=C(C=C2)N=C4CCCCCN4C3=O	130541895	-1	0
16012671	C1C(CN(C1=O)C2=CC=C(C=C2)F)C3=NC4=CC=CC=C4N3CCCOC5=CC=CC=C5	130544534	-1	3.66993
16012811	CCCOCC1=CC(=C(C2=C1C=CC=N2)O)CN3CCN(CC3)C4=CC(=CC=C4)Cl	130546054	-1	4.6317
16013327	CCN(CC1=CC=CC=C1)CC2=C(C=CC3=C2C(=C(O3)C)C(=O)NC4=C(C=C(C=C4)C)C)O	130551672	-1	4.81019
16013532	CCOC1=C(C=C(C=C1)C2=NON=C2NC(=O)C3=CC=CO3)OCC	130553927	-1	1.58658
16013685	CC1=C(C=C(C=C1)NC2=CC(=NC3=NN=CN23)C)C	130555610	-1	3.91709
16013725	COC1=CC=CC=C1N2CCN(CC2)C3=C4CCCC4=NC5=NN=CN35	130556024	-1	2.84071
16015353	CC1=CC=CC=C1OCCSC2=NC3=C(S2)C=C(C=C3)NC(=O)C4=CC=CC=C4	130573800	-1	5.91596
16015355	CC1=CC=CC=C1OCCSC2=NC3=C(S2)C=C(C=C3)NC(=O)C4=CC=CS4	130573822	-1	3.97059
16015934	CCCCOC1=CC=CC(=C1)C(=O)N(CC2=CC=CS2)C3=CC=C(C=C3)OC	130580191	-1	1.2004
16016570	COC1=CC=CC(=C1)NC(=O)C2=CC=CC3=C2NC4=C(C3=O)CCCC4	130587181	-1	0
16016832	CC1=CC=CC=C1CNC(=O)C2=C(C3=C(O2)CCC4=C3NN=C4)C	130590029	-1	0.817784
16017730	CN1C2=C(CS(=O)(=O)C3=CC=CC=C32)C(=N1)C(=O)NC4=CC(=C(C=C4)F)Cl	130599717	-1	1.46801
16017878	CC1=C(C=C(C=C1)Cl)NC2=NC3=CC=CC=C3N4C2=NN=C4C	130601273	-1	3.34526
16018309	C1CCN(CC1)CCCNC(=O)C2=CC3=C(C=C2)N4C=C(N=C4S3)C5=CC=C(C=C5)F	130605982	-1	1.35165
16018313	CC1CCCCN1CCCNC(=O)C2=CC3=C(C=C2)N4C=C(N=C4S3)C5=CC=C(C=C5)F	130606026	-1	1.35165
16018404	COC1=CC=CC(=C1)C2=NOC(=C2)C(=O)NC3=C(C=CC(=C3)Cl)O	130607027	-1	7.87212
16018448	CCCN1CCN(CC1)CCCNC(=O)C2=CC3=C(C=C2)N4C=C(N=C4S3)C5=CC=C(C=C5)OC	130607511	-1	0
16018552	CC1=C(C(=CC=C1)NS(=O)(=O)C2=CC3=C(C=C2)NC(=O)C=C3)C	130608655	-1	2.93679
16019222	CC1=CC(=C(C=C1)C)CN2C=C(C3=CC=CC=C32)CCC(=O)NCC4=CC(=C(C=C4)OC)OC	130615807	-1	2.51429
16020136	COC1=CC(=CC(=C1OC)OC)NC(=O)CN2C3=C(C=N2)C(=O)OC4=CC=CC=C43	130625243	-1	10.9364
16020383	CCCN(CCC)CCCNC(=O)C1=CC2=C(S1)N(N=C2C3=CC(=C(C=C3)OC)OC)C	130627960	-1	1.60477
16020583	CN1C=C(C(=O)C2=CC(=C(C=C21)N3CCCCC3)F)S(=O)(=O)C4=CC(=CC=C4)Cl	130630160	-1	1.52199
16021375	CC1=CC(=NC2=C1C=C(C=C2)NC(=O)C3=CC(=CN=C3)Br)NC4=CC=CC(=C4)C(F)(F)F	130638848	-1	10.2498
16022664	CCC(C(=O)NCC1=CC(=C(C=C1)OC)OC)N2C(=O)C3=NN(C(=C3C(=N2)C)C)C4=CC=C(C=C4)C	130652993	-1	1.22592
16022838	CCOC(=O)C1=CC(=CC=C1)NC(=O)CCN2C(=O)C3=NN(C(=C3C(=N2)C)C)C4=CC=CC=C4	130654907	-1	0.570423
16023100	CC1=CC(=CC=C1)N(C)C2=NC3=CC=CC=C3C4=NN=C(N42)C	130657781	-1	0.820068
16023277	CC1=CC(=C(C=C1)NC(=O)C2=C(N=C3C(=CNN3C2C4=CC(=CC=C4)OC)C(=O)NC5=CC=CC=C5)C)C	130659632	-1	6.23115
16023305	CCC1=CC=C(C=C1)C2C(=C(N=C3N2NC=C3C(=O)NC4=CC=C(C=C4)C)C)C(=O)NC5=CC=CC=C5	130659924	-1	2.33312
16024864	CCN(C1=CC=CC(=C1)C)C(=O)CSC2=NC(=NO2)C3=CC=C(C=C3)C(C)C	130676897	-1	2.1597
16025070	CCOC(=O)N1CCC(CC1)NC(=O)C2=C(N(N=C2C)C3=CC=CC(=C3)C)N4C=CC=C4	130679159	-1	4.81428
16025899	CC1=C(N(C2=C1C=C(C=C2)C(=O)NCC3=CC=CO3)CC4=CC=C(C=C4)F)C	130688236	-1	1.72
16026739	C1CC1C2=NN3C(=O)C=C(N=C3S2)COC(=O)COC4=CC=CC=C4Cl	130697476	-1	8.58278
16029619	CCOC(=O)C1=NNC(=C1)S(=O)(=O)NCC2=CC=C(C=C2)F	130729076	-1	1.65484
16032033	C1=CC=C(C=C1)C2=NC(=CS2)CCNC(=O)C3=CC=CC=C3	130754703	-1	0
16032335	CCOC1=C2C(=CC=C1)SC(=N2)N(CC3=CN=CC=C3)C(=O)C4CCCCC4	130757829	-1	1.16803
16033189	C1CCC(C1)N2C=CN=C2SCC(=O)NC3=C(C=CC(=C3)C(F)(F)F)Cl	130767191	-1	3.92322
16033711	CC(C)(C)C1=CC=C(C=C1)CN2C3=CC=CC=C3S(=O)(=O)N(C2=O)C4=CC(=CC(=C4)OC)OC	130772933	-1	3.94657
16034122	CCOC1=C(C=C(C=C1)C2C(=O)N(CC(=O)N2CC3=CC=C(C=C3)F)C4CCCCC4)OC	130777434	-1	1.78378
16034140	CCOC(=O)C1=CC(=C(C=C1)N2CCN(CC2)C3=C(C=CC(=C3)C)C)NC(=O)NC4=CC=C(C=C4)Cl	130777632	-1	16.4531
16760634	C1=CN=CC=C1NC(=O)NC2=C(C=C(C=C2Cl)Cl)Cl	137912484	-1	15.5425
54675776	C[C@@]1([C@H]2C[C@H]3[C@@H](C(=O)C(=C([C@]3(C(=O)C2=C(C4=C1C=CC=C4O)O)O)O)C(=O)N)N(C)C)O	352926831	-1	41.859
54678166	C1CN2C3=C(C=CC=C31)C(=C(C2=O)C(=O)NC4=CN=CC=C4)O	352952755	-1	1.66302
9060	C1=CC=C2C(=C1)C(=CN2)C[C@H](C(=O)O)N	1467866565	-1	3.86726
171548	C1[C@H]2[C@@H]([C@@H](S1)CCCCC(=O)O)NC(=O)N2	1467867147	-1	3
525	C(C(C(=O)O)O)C(=O)O	1467867543	-1	3.66531
936	C1=CC(=CN=C1)C(=O)N	1467867595	-1	1.72973
444899	CCCCC/C=C\C/C=C\C/C=C\C/C=C\CCCC(=O)O	1467868463	-1	3.61504
6128	C[C@]12CCC(=O)C=C1CC[C@@H]3[C@@H]2CC[C@]4([C@H]3CCC4=O)C	1467869193	-1	31.3191
5280343	C1=CC(=C(C=C1C2=C(C(=O)C3=C(C=C(C=C3O2)O)O)O)O)O	1467870413	-1	25.4004
5610	C1=CC(=CC=C1CCN)O	1467871421	-1	1.79121
932	C1C(OC2=CC(=CC(=C2C1=O)O)O)C3=CC=C(C=C3)O	1467871750	-1	16.2039
439246	C1[C@H](OC2=CC(=CC(=C2C1=O)O)O)C3=CC=C(C=C3)O	1467871750	-1	16.2039
932	C1C(OC2=CC(=CC(=C2C1=O)O)O)C3=CC=C(C=C3)O	1467871750	-1	16.2039
439246	C1[C@H](OC2=CC(=CC(=C2C1=O)O)O)C3=CC=C(C=C3)O	1467871750	-1	16.2039
5408	CC12CCC3C(C1CCC2O)CCC4=CC(=O)CCC34C	1467872060	-1	24
5701998	C[C@]12CCC3C(C1CC[C@@H]2O)CCC4=CC(=O)CC[C@]34C	1467872060	-1	24
5408	CC12CCC3C(C1CCC2O)CCC4=CC(=O)CCC34C	1467872060	-1	24
5701998	C[C@]12CCC3C(C1CC[C@@H]2O)CCC4=CC(=O)CC[C@]34C	1467872060	-1	24
86	C1=CC(=C(C(=C1)O)N)C(=O)O	1467873011	-1	8.11313
657272	C[N+](C)(C)CCOP(=O)([O-])OC[C@@H](CO)O	1467873383	-1	16.8723
72172	CC(C)C[C@@H](C(=O)O)NC(=O)[C@H]([C@@H](CC1=CC=CC=C1)N)O	1467873971	-1	3
89594	CN1CCC[C@H]1C2=CN=CC=C2	1467874107	-1	0.756974
2353	COC1=C(C2=C[N+]3=C(C=C2C=C1)C4=CC5=C(C=C4CC3)OCO5)OC	1467874237	-1	5.70237
5280371	C1=CC(=O)OC2=CC3=C(C=CO3)C(=C21)O	1467874251	-1	11.7948
10251	C1C(OC2=CC=CC=C2C1=O)C3=CC=CC=C3	1467874346	-1	5.21516
5478883	C[C@@H](C(=O)N[C@@H](CC(C)C)[C@H](CC(=O)O)O)NC(=O)C[C@@H]([C@H](CC(C)C)NC(=O)[C@H](C(C)C)NC(=O)[C@H](C(C)C)NC(=O)CC(C)C)O	1467874399	-1	13.2687
4788	C1=CC(=CC=C1CCC(=O)C2=C(C=C(C=C2O)O)O)O	1467874409	-1	17.5361
444795	CC1=C(C(CCC1)(C)C)/C=C/C(=C/C=C/C(=C/C(=O)O)/C)/C	1467874429	-1	35
5282379	CC1=C(C(CCC1)(C)C)/C=C/C(=C/C=C/C(=C\C(=O)O)/C)/C	1467874429	-1	35
444795	CC1=C(C(CCC1)(C)C)/C=C/C(=C/C=C/C(=C/C(=O)O)/C)/C	1467874429	-1	35
5282379	CC1=C(C(CCC1)(C)C)/C=C/C(=C/C=C/C(=C\C(=O)O)/C)/C	1467874429	-1	35
54676038	C1=CC=C2C(=C1)C(=C(C(=O)O2)CC3=C(C4=CC=CC=C4OC3=O)O)O	1467874641	-1	0
5280373	COC1=CC=C(C=C1)C2=COC3=CC(=CC(=C3C2=O)O)O	1467874874	-1	8.60574
3126	CCCCCCCCCCCCCCCC(C(CO)N)O	1467875124	-1	42
3126	CCCCCCCCCCCCCCCC(C(CO)N)O	1467875124	1	42
3126	CCCCCCCCCCCCCCCC(C(CO)N)O	1467875124	-1	42
3126	CCCCCCCCCCCCCCCC(C(CO)N)O	1467875124	1	42
1794427	C1[C@H]([C@H]([C@@H](C[C@@]1(C(=O)O)O)OC(=O)/C=C/C2=CC(=C(C=C2)O)O)O)O	1467875296	-1	20.2406
5280378	COC1=CC=C(C=C1)C2=COC3=C(C2=O)C=CC(=C3)O	1467875371	-1	3.64624
5280388	CCCCC[C@@H](/C=C/C1=C(C(=O)CC1)CCCCCCC(=O)O)O	1467876366	-1	21.0202
903	CC(=O)NCCC1=CNC2=C1C=C(C=C2)O	1467876547	-1	1.50442
6710628	CC(=O)[C@]1(CCC2[C@@]1(CCC3C2CCC4=CC(=O)CC[C@]34C)C)O	1467878411	-1	28
689043	C1=CC(=C(C=C1/C=C/C(=O)O)O)O	1467878631	-1	20.4477
439487	CC(C)C[C@@H](C(=O)NCCCCN=C(N)N)NC(=O)[C@H]1[C@@H](O1)C(=O)O	1467879863	-1	23.0733
1967	CC1=C(C(=O)C(=C(C1=O)C)CCCCC#CCCCC#CCO)C	1467879945	-1	28.1216
92249	CC1=CC(=O)OC2=C1C=CC(=C2)N	1467880148	-1	6.69384
289840	CC1C(C(C(C(O1)O[C@H]2C[C@H]([C@@]3([C@@H]4[C@@H](CC[C@@]3(C2)O)[C@]5(CC[C@@H]([C@]5(C[C@H]4O)C)C6=CC(=O)OC6)O)CO)O)O)O)O	1467880543	1	37.04
439501	C[C@H]1[C@@H]([C@H]([C@H]([C@@H](O1)O[C@H]2C[C@H]([C@@]3([C@@H]4[C@@H](CC[C@@]3(C2)O)[C@]5(CC[C@@H]([C@]5(C[C@H]4O)C)C6=CC(=O)OC6)O)CO)O)O)O)O	1467880543	1	37.04
12420	C[C@H]1[C@@H]([C@H]([C@H]([C@@H](O1)O[C@H]2C[C@H]([C@@]3(C4[C@@H](C[C@@]5([C@H](CC[C@@]5(C4CC[C@@]3(C2)O)O)C6=CC(=O)OC6)C)O)CO)O)O)O)O	1467880543	1	37.04
289840	CC1C(C(C(C(O1)O[C@H]2C[C@H]([C@@]3([C@@H]4[C@@H](CC[C@@]3(C2)O)[C@]5(CC[C@@H]([C@]5(C[C@H]4O)C)C6=CC(=O)OC6)O)CO)O)O)O)O	1467880543	1	37.04
439501	C[C@H]1[C@@H]([C@H]([C@H]([C@@H](O1)O[C@H]2C[C@H]([C@@]3([C@@H]4[C@@H](CC[C@@]3(C2)O)[C@]5(CC[C@@H]([C@]5(C[C@H]4O)C)C6=CC(=O)OC6)O)CO)O)O)O)O	1467880543	1	37.04
12420	C[C@H]1[C@@H]([C@H]([C@H]([C@@H](O1)O[C@H]2C[C@H]([C@@]3(C4[C@@H](C[C@@]5([C@H](CC[C@@]5(C4CC[C@@]3(C2)O)O)C6=CC(=O)OC6)C)O)CO)O)O)O)O	1467880543	1	37.04
289840	CC1C(C(C(C(O1)O[C@H]2C[C@H]([C@@]3([C@@H]4[C@@H](CC[C@@]3(C2)O)[C@]5(CC[C@@H]([C@]5(C[C@H]4O)C)C6=CC(=O)OC6)O)CO)O)O)O)O	1467880543	1	37.04
439501	C[C@H]1[C@@H]([C@H]([C@H]([C@@H](O1)O[C@H]2C[C@H]([C@@]3([C@@H]4[C@@H](CC[C@@]3(C2)O)[C@]5(CC[C@@H]([C@]5(C[C@H]4O)C)C6=CC(=O)OC6)O)CO)O)O)O)O	1467880543	1	37.04
12420	C[C@H]1[C@@H]([C@H]([C@H]([C@@H](O1)O[C@H]2C[C@H]([C@@]3(C4[C@@H](C[C@@]5([C@H](CC[C@@]5(C4CC[C@@]3(C2)O)O)C6=CC(=O)OC6)C)O)CO)O)O)O)O	1467880543	1	37.04
1935	C1CCC2=NC3=CC=CC=C3C(=C2C1)N	1467880636	-1	1.01985
6713958	C1=CC(=CC=C1C2=CC(=O)C3=C(O2)C(=C(C=C3O)O)C4[C@@H]([C@H]([C@@H]([C@H](O4)CO)O)O)O)O	1467880714	-1	9.2165
5280442	COC1=CC=C(C=C1)C2=CC(=O)C3=C(C=C(C=C3O2)O)O	1467880776	-1	7.42526
637760	C1=CC=C(C=C1)/C=C/C(=O)C2=CC=CC=C2	1467880872	-1	9.29579
5280445	C1=CC(=C(C=C1C2=CC(=O)C3=C(C=C(C=C3O2)O)O)O)O	1467881156	-1	8.23979
1302	CC(C1=CC2=C(C=C1)C=C(C=C2)OC)C(=O)O	1467881183	-1	2.63415
156391	C[C@@H](C1=CC2=C(C=C1)C=C(C=C2)OC)C(=O)O	1467881183	-1	2.63415
1302	CC(C1=CC2=C(C=C1)C=C(C=C2)OC)C(=O)O	1467881183	-1	2.63415
156391	C[C@@H](C1=CC2=C(C=C1)C=C(C=C2)OC)C(=O)O	1467881183	-1	2.63415
10666	CN1C=CC(=C(C1=O)C#N)OC	1467881229	-1	0.982456
1548887	CC\1=C(C2=C(/C1=C\C3=CC=C(C=C3)S(=O)C)C=CC(=C2)F)CC(=O)O	1467881293	-1	12.6957
54678486	CC(=O)CC(C1=CC=CC=C1)C2=C(C3=CC=CC=C3OC2=O)O	1467881352	-1	8.84181
2355	COC1=C2C=CC(=O)OC2=CC3=C1C=CO3	1467881501	-1	14.3759
7028	C[C@@H]([C@H](C1=CC=CC=C1)O)NC	1467881685	-1	0
6710657	CC([C@@H](C1=CC=CC=C1)O)NC	1467881685	-1	0
5032	CC(C(C1=CC=CC=C1)O)NC	1467881685	-1	0
7028	C[C@@H]([C@H](C1=CC=CC=C1)O)NC	1467881685	-1	0
6710657	CC([C@@H](C1=CC=CC=C1)O)NC	1467881685	-1	0
5032	CC(C(C1=CC=CC=C1)O)NC	1467881685	-1	0
7028	C[C@@H]([C@H](C1=CC=CC=C1)O)NC	1467881685	-1	0
6710657	CC([C@@H](C1=CC=CC=C1)O)NC	1467881685	-1	0
5032	CC(C(C1=CC=CC=C1)O)NC	1467881685	-1	0
439525	CC1OCC2C(O1)C(C(C(O2)O[C@H]3[C@H]4COC(=O)[C@@H]4[C@@H](C5=CC6=C(C=C35)OCO6)C7=CC(=C(C(=C7)OC)O)OC)O)O	1467881698	1	54
36462	C[C@@H]1OC[C@@H]2[C@@H](O1)[C@@H]([C@H]([C@@H](O2)O[C@H]3[C@H]4COC(=O)[C@@H]4[C@@H](C5=CC6=C(C=C35)OCO6)C7=CC(=C(C(=C7)OC)O)OC)O)O	1467881698	-1	54
6708815	CC1OC[C@@H]2[C@@H](O1)[C@@H]([C@H](C(O2)OC3C4COC(=O)[C@@H]4[C@@H](C5=CC6=C(C=C35)OCO6)C7=CC(=C(C(=C7)OC)O)OC)O)O	1467881698	-1	54
439525	CC1OCC2C(O1)C(C(C(O2)O[C@H]3[C@H]4COC(=O)[C@@H]4[C@@H](C5=CC6=C(C=C35)OCO6)C7=CC(=C(C(=C7)OC)O)OC)O)O	1467881698	1	54
36462	C[C@@H]1OC[C@@H]2[C@@H](O1)[C@@H]([C@H]([C@@H](O2)O[C@H]3[C@H]4COC(=O)[C@@H]4[C@@H](C5=CC6=C(C=C35)OCO6)C7=CC(=C(C(=C7)OC)O)OC)O)O	1467881698	-1	54
6708815	CC1OC[C@@H]2[C@@H](O1)[C@@H]([C@H](C(O2)OC3C4COC(=O)[C@@H]4[C@@H](C5=CC6=C(C=C35)OCO6)C7=CC(=C(C(=C7)OC)O)OC)O)O	1467881698	-1	54
439525	CC1OCC2C(O1)C(C(C(O2)O[C@H]3[C@H]4COC(=O)[C@@H]4[C@@H](C5=CC6=C(C=C35)OCO6)C7=CC(=C(C(=C7)OC)O)OC)O)O	1467881698	1	54
36462	C[C@@H]1OC[C@@H]2[C@@H](O1)[C@@H]([C@H]([C@@H](O2)O[C@H]3[C@H]4COC(=O)[C@@H]4[C@@H](C5=CC6=C(C=C35)OCO6)C7=CC(=C(C(=C7)OC)O)OC)O)O	1467881698	-1	54
6708815	CC1OC[C@@H]2[C@@H](O1)[C@@H]([C@H](C(O2)OC3C4COC(=O)[C@@H]4[C@@H](C5=CC6=C(C=C35)OCO6)C7=CC(=C(C(=C7)OC)O)OC)O)O	1467881698	-1	54
5280450	CCCCC/C=C\C/C=C\CCCCCCCC(=O)O	1467881851	-1	31.7353
896	CC(=O)NCCC1=CNC2=C1C=C(C=C2)OC	1467881882	-1	1
6072	C1=CC(=CC=C1CCC(=O)C2=C(C=C(C=C2O[C@H]3[C@@H]([C@H]([C@@H]([C@H](O3)CO)O)O)O)O)O)O	1467881939	-1	5.41936
2724365	CN(C)C1=NC=NC2=C1N=CN2[C@H]3[C@@H]([C@@H]([C@H](O3)CO)NC(=O)C(CC4=CC=C(C=C4)OC)N)O	1467881996	-1	2.99114
439530	CN(C)C1=NC=NC2=C1N=CN2[C@H]3[C@@H]([C@@H]([C@H](O3)CO)NC(=O)[C@H](CC4=CC=C(C=C4)OC)N)O	1467881996	-1	2.99114
5702164	CN(C)C1=NC=NC2=C1N=CN2C3[C@@H]([C@@H]([C@H](O3)CO)NC(=O)[C@H](CC4=CC=C(C=C4)OC)N)O	1467881996	-1	2.99114
2724365	CN(C)C1=NC=NC2=C1N=CN2[C@H]3[C@@H]([C@@H]([C@H](O3)CO)NC(=O)C(CC4=CC=C(C=C4)OC)N)O	1467881996	-1	2.99114
439530	CN(C)C1=NC=NC2=C1N=CN2[C@H]3[C@@H]([C@@H]([C@H](O3)CO)NC(=O)[C@H](CC4=CC=C(C=C4)OC)N)O	1467881996	-1	2.99114
5702164	CN(C)C1=NC=NC2=C1N=CN2C3[C@@H]([C@@H]([C@H](O3)CO)NC(=O)[C@H](CC4=CC=C(C=C4)OC)N)O	1467881996	-1	2.99114
2724365	CN(C)C1=NC=NC2=C1N=CN2[C@H]3[C@@H]([C@@H]([C@H](O3)CO)NC(=O)C(CC4=CC=C(C=C4)OC)N)O	1467881996	-1	2.99114
439530	CN(C)C1=NC=NC2=C1N=CN2[C@H]3[C@@H]([C@@H]([C@H](O3)CO)NC(=O)[C@H](CC4=CC=C(C=C4)OC)N)O	1467881996	-1	2.99114
5702164	CN(C)C1=NC=NC2=C1N=CN2C3[C@@H]([C@@H]([C@H](O3)CO)NC(=O)[C@H](CC4=CC=C(C=C4)OC)N)O	1467881996	-1	2.99114
2004	CCOC(=O)C(CC1=CC=C(C=C1)O)NC(=O)C	1467882361	-1	2.59719
32875	CC1C(C(CC(O1)O[C@H]2C[C@@](CC3=C(C4=C(C(=C23)O)C(=O)C5=C(C4=O)C=CC=C5OC)O)(C(=O)CO)O)N)O	1467882393	1	64
31703	C[C@H]1[C@H]([C@H](C[C@@H](O1)O[C@H]2C[C@@](CC3=C(C4=C(C(=C23)O)C(=O)C5=C(C4=O)C=CC=C5OC)O)(C(=O)CO)O)N)O	1467882393	1	64
32875	CC1C(C(CC(O1)O[C@H]2C[C@@](CC3=C(C4=C(C(=C23)O)C(=O)C5=C(C4=O)C=CC=C5OC)O)(C(=O)CO)O)N)O	1467882393	1	64
31703	C[C@H]1[C@H]([C@H](C[C@@H](O1)O[C@H]2C[C@@](CC3=C(C4=C(C(=C23)O)C(=O)C5=C(C4=O)C=CC=C5OC)O)(C(=O)CO)O)N)O	1467882393	1	64
5283740	C[C@H](CCCC(C)(C)O)[C@H]1CC[C@@H]\2[C@@]1(CCC/C2=C\C=C\3/C[C@H](C[C@@H](C3=C)O)O)C	1467882454	-1	10
3033	C1=CC=C(C(=C1)CC(=O)O)NC2=C(C=CC=C2Cl)Cl	1467882601	-1	9.64935
3059	C1=CC(=C(C=C1C2=C(C=C(C=C2)F)F)C(=O)O)O	1467882612	-1	8.31034
3117	CCN(CC)C(=S)SSC(=S)N(CC)CC	1467882623	-1	74
6466	C[C@@]12[C@H](C=C[C@@]3([C@@H]1[C@@H]([C@]45[C@H]3CC[C@](C4)(C(=C)C5)O)C(=O)O)OC2=O)O	1467882691	-1	0.629268
72281	COC1=C(C=C(C=C1)[C@@H]2CC(=O)C3=C(C=C(C=C3O2)O)O)O	1467882771	-1	19.1896
3825	CC(C1=CC=CC(=C1)C(=O)C2=CC=CC=C2)C(=O)O	1467882855	-1	3.76884
5280457	C1=CC=C(C=C1)/C=C/C2=CC(=CC(=C2)O)O	1467883157	-1	19.9577
6710619	CC1[C@@H]([C@H]([C@H]([C@@H](O1)OC2=C(OC3=CC(=CC(=C3C2=O)O)O)C4=CC(=C(C=C4)O)O)O)O)O	1467883211	-1	28.241
5280460	COC1=C(C=C2C(=C1)C=CC(=O)O2)O	1467883243	-1	11.775
2082	CCCSC1=CC2=C(C=C1)N=C(N2)NC(=O)OC	1467883519	1	20
2082	CCCSC1=CC2=C(C=C1)N=C(N2)NC(=O)OC	1467883519	-1	20
2082	CCCSC1=CC2=C(C=C1)N=C(N2)NC(=O)OC	1467883519	1	20
2082	CCCSC1=CC2=C(C=C1)N=C(N2)NC(=O)OC	1467883519	-1	20
6728942	CCC(C)C(=O)O[C@H]1C[C@@H](C=C2C1[C@H]([C@H](C=C2)C)CC[C@H](C[C@H](CC(=O)O)O)O)O	1467884040	-1	10.1515
7172	CNCC(C1=CC=C(C=C1)O)O	1467884278	-1	1.91489
7172	CNCC(C1=CC=C(C=C1)O)O	1467884278	1	1.91489
7172	CNCC(C1=CC=C(C=C1)O)O	1467884278	-1	1.91489
7172	CNCC(C1=CC=C(C=C1)O)O	1467884278	1	1.91489
30323	C[C@H]1[C@H]([C@H](C[C@@H](O1)O[C@H]2C[C@@](CC3=C(C4=C(C(=C23)O)C(=O)C5=C(C4=O)C=CC=C5OC)O)(C(=O)C)O)N)O	1467884615	1	62
10140	C[C@H](CCC(=O)NCC(=O)O)[C@H]1CC[C@@H]2[C@@]1([C@H](C[C@H]3[C@H]2[C@@H](C[C@H]4[C@@]3(CC[C@H](C4)O)C)O)O)C	1467884711	-1	3.58236
3715	CC1=C(C2=C(N1C(=O)C3=CC=C(C=C3)Cl)C=CC(=C2)OC)CC(=O)O	1467884759	-1	12.4431
1046	C1=CN=C(C=N1)C(=O)N	1467885048	-1	0
5578	COC1=CC(=CC(=C1OC)OC)CC2=CN=C(N=C2N)N	1467885143	-1	21.4444
44259	C[C@@]12[C@@H]([C@@H](C[C@@H](O1)N3C4=CC=CC=C4C5=C6C(=C7C8=CC=CC=C8N2C7=C53)CNC6=O)NC)OC	1467886019	1	7
25044204	CC1=CC=C(C=C1)S(=O)(=O)N[C@H](CC2=CC=CC=C2)C(=O)CCl	1467886106	-1	28.5116
439647	CC1=CC=C(C=C1)S(=O)(=O)N[C@@H](CC2=CC=CC=C2)C(=O)CCl	1467886106	-1	28.5116
25044204	CC1=CC=C(C=C1)S(=O)(=O)N[C@H](CC2=CC=CC=C2)C(=O)CCl	1467886106	-1	28.5116
439647	CC1=CC=C(C=C1)S(=O)(=O)N[C@@H](CC2=CC=CC=C2)C(=O)CCl	1467886106	-1	28.5116
439654	COC1=C(C2=C(C[C@H]3C4=CC(=C(C=C4CCN3C2)OC)O)C=C1)O	1467886249	-1	4.74342
5753	C[C@]12CCC(=O)C=C1CC[C@@H]3[C@@H]2[C@H](C[C@]4([C@H]3CC[C@@H]4C(=O)CO)C)O	1467886548	-1	33.6554
68079	COC1=C2C=COC2=C(C3=C1C=CC(=O)O3)OC	1467886710	-1	14.645
4044	CC1=C(C(=CC=C1)NC2=CC=CC=C2C(=O)O)C	1467886775	-1	9.76
221071	C[C@H]1[C@@H]2CC[C@]3(C=CC(=O)C(=C3[C@H]2OC1=O)C)C	1467887058	-1	17.0442
5702287	C[C@]12CC[C@](C[C@H]1C3=CC(=O)C4[C@]5(CC[C@@H](C(C5CC[C@]4([C@@]3(CC2)C)C)(C)C)O)C)(C)C(=O)O	1467887698	-1	22.5718
5146	C1=CC=C(C(=C1)CO)O	1467887980	-1	1.37563
26934	C[C@H]([C@H](C1=CC=CC=C1)O)N	1467888153	-1	0
4362	CCN1C(=O)C=CC1=O	1467888791	-1	4.46078
1493	C1=CC(=C(C=C1[N+](=O)[O-])[N+](=O)[O-])O	1467889248	-1	22.3553
439744	C1=CC(=C(C=C1C[C@@H](C(=O)O)N)I)O	1467889417	-1	16.0678
4649	C1=CC(=C(C=C1N)O)C(=O)O	1467889438	-1	18.8072
992	C1(=C(C(=C(C(=C1Cl)Cl)Cl)Cl)Cl)O	1467889809	-1	34
6708786	C[C@]12CCC3C(=CC(=O)C4[C@@]3(C[C@@H]([C@@H](C4)O)O)C)[C@@]1(CCC2[C@](C)([C@@H](CCC(C)(C)O)O)O)O	1467890202	-1	9.03107
70912	CC(C)C[C@@H](C(=O)O)NC(=O)C	1467890765	-1	3.42604
54675757	CC1=CC(=CC(=O)O1)O	1467891102	-1	0
99613	CC1=CC(=CC(=C1C(=O)OC2=CC(=C(C(=C2)C)C(=O)O)O)O)O	1467891933	-1	16.9192
5417	COC1=C(C2=C(CC3C4=CC(=C(C=C4CCN3C2)OC)OC)C=C1)OC	1467892060	-1	5.03514
273260	CC(=O)NC(CC1=CN=CN1)C(=O)O	1467892899	-1	2.57647
67069	CNC1=CC=CC=C1C(=O)O	1467892975	-1	2.70212
5280567	CC1=CC(=O)OC2=C1C=CC(=C2)O	1467893582	-1	5.34375
5280569	C1=CC(=C(C2=C1C=CC(=O)O2)O)O	1467893706	-1	25.0223
6710677	CN1[C@H]2C[C@H](CC1C[C@@H]2O)OC(=O)[C@H](CO)C3=CC=CC=C3	1467895336	-1	7.96992
34458	COC1=C(C2=C(CC3C4=CC5=C(C=C4CCN3C2)OCO5)C=C1)OC	1467895367	-1	3.70486
70652	COC(=O)[C@H](CC1=CC=C(C=C1)O)N	1467895824	-1	2.54825
179651	C[C@@]12CC[C@H]3[C@]([C@@]14[C@H](O4)C(=O)O[C@H]2C5=COC=C5)(C(=O)C[C@@H]6[C@@]37COC(=O)C[C@@H]7OC6(C)C)C	1467896566	-1	20.8914
2000	CC(=O)NC(CC1=CC=CC=C1)C(=O)O	1467896617	-1	1.88889
445154	C1=CC(=CC=C1/C=C/C2=CC(=CC(=C2)O)O)O	1467896992	-1	21.9167
445154	C1=CC(=CC=C1/C=C/C2=CC(=CC(=C2)O)O)O	1467896992	1	21.9167
445154	C1=CC(=CC=C1/C=C/C2=CC(=CC(=C2)O)O)O	1467896992	-1	21.9167
445154	C1=CC(=CC=C1/C=C/C2=CC(=CC(=C2)O)O)O	1467896992	1	21.9167
37783	CCCC(=O)O[C@@H]1[C@H]([C@]2([C@@H](C=C(C[C@]3([C@H]2C=C(C3=O)C)O)CO)[C@H]4[C@@]1(C4(C)C)OC(=O)CCC)O)C	1467897364	-1	8.29101
1486	C1=CC(=C(C=C1Cl)Cl)OCC(=O)O	1467897604	-1	7.46377
92730	CC(=O)[C@H]1CC[C@@H]2[C@@]1(C[C@H]([C@H]3[C@H]2CCC4=CC(=O)CC[C@]34C)O)C	1467898206	-1	31.6757
3036	C1=CC(=CC=C1C(C2=CC=C(C=C2)Cl)C(Cl)(Cl)Cl)Cl	1467904322	-1	65.2609
5281912	CCCCC[C@@H](/C=C/[C@H]1C=CC(=O)[C@@H]1CCCCCCC(=O)O)O	1467904838	-1	22.6765
5280746	C1[C@@]([C@H]([C@@H](O1)O[C@@H]2[C@H]([C@@H]([C@H](O[C@H]2OC3=CC(=C4C(=C3)OC(=CC4=O)C5=CC=C(C=C5)O)O)CO)O)O)O)(CO)O	1467906113	-1	18.4272
39468	CC(C)(C)NC[C@@H](COC1=CC=CC2=C1CCCC2=O)O	1467906299	-1	3.46065
5460339	CC(C)(C)NC[C@H](COC1=CC=CC2=C1CCCC2=O)O	1467906299	-1	3.46065
39468	CC(C)(C)NC[C@@H](COC1=CC=CC2=C1CCCC2=O)O	1467906299	-1	3.46065
5460339	CC(C)(C)NC[C@H](COC1=CC=CC2=C1CCCC2=O)O	1467906299	-1	3.46065
6230	C[C@]12CC[C@H]3[C@H]([C@@H]1CC[C@]2(C#C)O)CCC4=CC(=O)CC[C@H]34	1467906816	-1	16
5702093	C[C@]12CCC3[C@H]4CCC(=O)C=C4CCC3C1CC[C@]2(C#C)O	1467906816	-1	16
6230	C[C@]12CC[C@H]3[C@H]([C@@H]1CC[C@]2(C#C)O)CCC4=CC(=O)CC[C@H]34	1467906816	-1	16
5702093	C[C@]12CCC3[C@H]4CCC(=O)C=C4CCC3C1CC[C@]2(C#C)O	1467906816	-1	16
54739	CC(C)C1(C(=O)NC(=N1)C2=NC3=CC=CC=C3C=C2C(=O)O)C	1467906924	-1	1.07855
54686757	CC1=C(C=CC2=C1OC(=O)C(=C2O)NC(=O)C3=CC(=C(C=C3)O)CC=C(C)C)OC4[C@@H]([C@@H]([C@H](C(O4)(C)C)OC)OC(=O)N)O	1467906946	-1	10.3773
54675769	CC1=C(C=CC2=C1OC(=O)C(=C2O)NC(=O)C3=CC(=C(C=C3)O)CC=C(C)C)O[C@H]4[C@@H]([C@@H]([C@H](C(O4)(C)C)OC)OC(=O)N)O	1467906946	-1	10.3773
54686757	CC1=C(C=CC2=C1OC(=O)C(=C2O)NC(=O)C3=CC(=C(C=C3)O)CC=C(C)C)OC4[C@@H]([C@@H]([C@H](C(O4)(C)C)OC)OC(=O)N)O	1467906946	-1	10.3773
54675769	CC1=C(C=CC2=C1OC(=O)C(=C2O)NC(=O)C3=CC(=C(C=C3)O)CC=C(C)C)O[C@H]4[C@@H]([C@@H]([C@H](C(O4)(C)C)OC)OC(=O)N)O	1467906946	-1	10.3773
5280754	CCC1C(=O)N(CC(=O)N(C(C(=O)NC(C(=O)N(C(C(=O)NC(C(=O)NC(C(=O)N(C(C(=O)N(C(C(=O)N(C(C(=O)N(C(C(=O)N1)C(C(C)C/C=C/C)O)C)C(C)C)C)CC(C)C)C)CC(C)C)C)C)C)CC(C)C)C)C(C)C)CC(C)C)C)C	1467906959	-1	26.0247
5284373	CC[C@H]1C(=O)N(CC(=O)N([C@H](C(=O)N[C@H](C(=O)N([C@H](C(=O)N[C@H](C(=O)N[C@@H](C(=O)N([C@H](C(=O)N([C@H](C(=O)N([C@H](C(=O)N([C@H](C(=O)N1)[C@@H]([C@H](C)C/C=C/C)O)C)C(C)C)C)CC(C)C)C)CC(C)C)C)C)C)CC(C)C)C)C(C)C)CC(C)C)C)C	1467906959	-1	26.0247
5280754	CCC1C(=O)N(CC(=O)N(C(C(=O)NC(C(=O)N(C(C(=O)NC(C(=O)NC(C(=O)N(C(C(=O)N(C(C(=O)N(C(C(=O)N(C(C(=O)N1)C(C(C)C/C=C/C)O)C)C(C)C)C)CC(C)C)C)CC(C)C)C)C)C)CC(C)C)C)C(C)C)CC(C)C)C)C	1467906959	-1	26.0247
5284373	CC[C@H]1C(=O)N(CC(=O)N([C@H](C(=O)N[C@H](C(=O)N([C@H](C(=O)N[C@H](C(=O)N[C@@H](C(=O)N([C@H](C(=O)N([C@H](C(=O)N([C@H](C(=O)N([C@H](C(=O)N1)[C@@H]([C@H](C)C/C=C/C)O)C)C(C)C)C)CC(C)C)C)CC(C)C)C)C)C)CC(C)C)C)C(C)C)CC(C)C)C)C	1467906959	-1	26.0247
91451	CC(=O)[C@]1(CC[C@@H]2[C@@]1(CC[C@H]3[C@H]2CC=C4[C@@]3(CC[C@@H](C4)O)C)C)O	1467907259	-1	7.98593
5756	C[C@]12CC[C@H]3[C@H]([C@@H]1C[C@H]([C@@H]2O)O)CCC4=C3C=CC(=C4)O	1467907298	-1	3.81339
5317223	C[C@]12CCC3C(C1C[C@H]([C@@H]2O)O)CCC4=C3C=CC(=C4)O	1467907298	-1	3.81339
5756	C[C@]12CC[C@H]3[C@H]([C@@H]1C[C@H]([C@@H]2O)O)CCC4=C3C=CC(=C4)O	1467907298	-1	3.81339
5317223	C[C@]12CCC3C(C1C[C@H]([C@@H]2O)O)CCC4=C3C=CC(=C4)O	1467907298	-1	3.81339
27924	CCCCCCCCCCCCCC(=O)O[C@@H]1[C@H]([C@]2([C@@H](C=C(C[C@]3([C@H]2C=C(C3=O)C)O)CO)[C@H]4[C@@]1(C4(C)C)OC(=O)C)O)C	1467907404	-1	41.4433
2752274	CN1CCC2=CC(=C(C=C2C1CC3=CC=C(C=C3)O)O)OC	1467907537	-1	2.57858
4970	CN1CCC2=CC3=C(C=C2C(=O)CC4=C(C1)C5=C(C=C4)OCO5)OCO3	1467907595	-1	1.46063
223997	C[C@]12CCC(=O)C=C1CC[C@@H]3[C@@H]2C(=O)C[C@]4([C@H]3CCC4=O)C	1467908270	-1	42.6756
19009	COC1=C(C2=C[N+]3=C(C=C2C=C1)C4=CC(=C(C=C4CC3)OC)OC)OC	1467908507	-1	4.41344
2764	C1CC1N2C=C(C(=O)C3=CC(=C(C=C32)N4CCNCC4)F)C(=O)O	1467908801	-1	12.672
16760037	C[C@@H]1[C@H](CC2(C([C@@H](C(O2)[C@@H](C[C@H]([C@@H](C)[C@H]([C@@H](C)/C=C(\C)/C(=C/C=C/C(=C\C#N)/C)/C)O)O)OC)OP(=O)(O)O)(C)C)O[C@@H]1C/C=C/C3=COC(=N3)[C@H](C)CCNC(=O)[C@@H]([C@@H]([C@@H](COC)N(C)C)O)O)O	1467908920	1	39.7702
92786	CC(=O)[C@H]1CC[C@@H]2[C@@]1(CC[C@H]3[C@H]2CC[C@@H]4[C@@]3(CC[C@H](C4)O)C)C	1467909924	-1	2.27848
440707	C[C@]12CCC(=O)C=C1CC[C@@H]3[C@@H]2CC[C@]4([C@H]3CC[C@@]4(C(=O)CO)O)C	1467910009	-1	28
5904	CC1([C@@H](N2[C@H](S1)[C@@H](C2=O)NC(=O)CC3=CC=CC=C3)C(=O)O)C	1467910339	-1	15.9686
5280804	C1=CC(=C(C=C1C2=C(C(=O)C3=C(C=C(C=C3O2)O)O)O[C@H]4[C@@H]([C@H]([C@@H]([C@H](O4)CO)O)O)O)O)O	1467910899	-1	28.418
1833	COC1=CC2=C(C=C1)NC=C2CCN	1467911235	-1	0.655738
667639	C1=CC(=C(C=C1/C=C/C2=CC(=CC(=C2)O)O)O)O	1467913049	-1	17.8435
5280880	CCCCC[C@@H](/C=C/[C@H]1C=CC(=O)[C@@H]1C/C=C\CCCC(=O)O)O	1467913644	-1	4.66464
5280881	CCCCC[C@@H](/C=C/C1=C(C(=O)CC1)C/C=C\CCCC(=O)O)O	1467913658	-1	4.45423
457964	C[C@]12CC[C@H]([C@@]([C@@H]1CC[C@@H]3[C@@]24CC[C@@]([C@H](C3)C4)(CO)O)(C)CO)O	1467914856	-1	0
457964	C[C@]12CC[C@H]([C@@]([C@@H]1CC[C@@H]3[C@@]24CC[C@@]([C@H](C3)C4)(CO)O)(C)CO)O	1467914856	1	0
457964	C[C@]12CC[C@H]([C@@]([C@@H]1CC[C@@H]3[C@@]24CC[C@@]([C@H](C3)C4)(CO)O)(C)CO)O	1467914856	-1	0
457964	C[C@]12CC[C@H]([C@@]([C@@H]1CC[C@@H]3[C@@]24CC[C@@]([C@H](C3)C4)(CO)O)(C)CO)O	1467914856	1	0
44634737	CCN1C[C@@]2([C@@H](C[C@@H]([C@@]34[C@@H]2[C@H](C([C@H]31)[C@@]5([C@@H]6[C@H]4C[C@]([C@@H]6OC(=O)C7=CC=CC=C7)([C@H]([C@@H]5O)OC)O)OC(=O)C)OC)OC)O)COC	1467914896	-1	1.13208
44634704	CCN1C[C@@]2([C@@H](C[C@@H]([C@]34[C@H]1[C@H]([C@@H](C23)OC)[C@]5([C@H]([C@H]([C@@]6(CC4C5[C@H]6OC(=O)C7=CC=CC=C7)O)OC)O)OC(=O)C)OC)O)COC	1467914896	-1	1.13208
44634737	CCN1C[C@@]2([C@@H](C[C@@H]([C@@]34[C@@H]2[C@H](C([C@H]31)[C@@]5([C@@H]6[C@H]4C[C@]([C@@H]6OC(=O)C7=CC=CC=C7)([C@H]([C@@H]5O)OC)O)OC(=O)C)OC)OC)O)COC	1467914896	-1	1.13208
44634704	CCN1C[C@@]2([C@@H](C[C@@H]([C@]34[C@H]1[C@H]([C@@H](C23)OC)[C@]5([C@H]([C@H]([C@@]6(CC4C5[C@H]6OC(=O)C7=CC=CC=C7)O)OC)O)OC(=O)C)OC)O)COC	1467914896	-1	1.13208
641266	C1CCN[C@H](C1)C2=CN=CC=C2	1467915673	-1	0.791254
6088	CNCCC1=CNC2=CC=CC=C21	1467915985	-1	1.50897
5280933	CCCCC/C=C\C/C=C\C/C=C\CCCCC(=O)O	1467917697	-1	1.51858
5280934	CC/C=C\C/C=C\C/C=C\CCCCCCCC(=O)O	1467917714	-1	30.7273
446284	CC/C=C\C/C=C\C/C=C\C/C=C\C/C=C\CCCC(=O)O	1467917733	-1	2.86299
445580	CC/C=C\C/C=C\C/C=C\C/C=C\C/C=C\C/C=C\CCC(=O)O	1467917752	-1	1.98745
5280939	CCCCC[C@@H](/C=C/[C@H]1[C@@H](C[C@@H]([C@@H]1CCCCCCC(=O)O)O)O)O	1467918200	-1	19.6765
5953	COC1=CC2=C(C=CN=C2C=C1)[C@@H]([C@H]3CC4CCN3C[C@@H]4C=C)O	1467918693	-1	8
24096961	COC1=CC2=C(C=CN=C2C=C1)[C@@H]([C@@H]3CC4CCN3CC4C=C)O	1467918693	-1	8
441074	COC1=CC2=C(C=CN=C2C=C1)[C@@H]([C@H]3C[C@@H]4CCN3C[C@@H]4C=C)O	1467918693	-1	8
94175	COC1=CC2=C(C=CN=C2C=C1)[C@H]([C@H]3C[C@@H]4CCN3C[C@@H]4C=C)O	1467918693	-1	8
5953	COC1=CC2=C(C=CN=C2C=C1)[C@@H]([C@H]3CC4CCN3C[C@@H]4C=C)O	1467918693	-1	8
24096961	COC1=CC2=C(C=CN=C2C=C1)[C@@H]([C@@H]3CC4CCN3CC4C=C)O	1467918693	-1	8
441074	COC1=CC2=C(C=CN=C2C=C1)[C@@H]([C@H]3C[C@@H]4CCN3C[C@@H]4C=C)O	1467918693	-1	8
94175	COC1=CC2=C(C=CN=C2C=C1)[C@H]([C@H]3C[C@@H]4CCN3C[C@@H]4C=C)O	1467918693	-1	8
5953	COC1=CC2=C(C=CN=C2C=C1)[C@@H]([C@H]3CC4CCN3C[C@@H]4C=C)O	1467918693	-1	8
24096961	COC1=CC2=C(C=CN=C2C=C1)[C@@H]([C@@H]3CC4CCN3CC4C=C)O	1467918693	-1	8
441074	COC1=CC2=C(C=CN=C2C=C1)[C@@H]([C@H]3C[C@@H]4CCN3C[C@@H]4C=C)O	1467918693	-1	8
94175	COC1=CC2=C(C=CN=C2C=C1)[C@H]([C@H]3C[C@@H]4CCN3C[C@@H]4C=C)O	1467918693	-1	8
5953	COC1=CC2=C(C=CN=C2C=C1)[C@@H]([C@H]3CC4CCN3C[C@@H]4C=C)O	1467918693	-1	8
24096961	COC1=CC2=C(C=CN=C2C=C1)[C@@H]([C@@H]3CC4CCN3CC4C=C)O	1467918693	-1	8
441074	COC1=CC2=C(C=CN=C2C=C1)[C@@H]([C@H]3C[C@@H]4CCN3C[C@@H]4C=C)O	1467918693	-1	8
94175	COC1=CC2=C(C=CN=C2C=C1)[C@H]([C@H]3C[C@@H]4CCN3C[C@@H]4C=C)O	1467918693	-1	8
101744	C=C[C@H]1CN2CC[C@H]1C[C@H]2[C@@H](C3=CC=NC4=CC=CC=C34)O	1467918721	-1	7.9854
5702153	C=C[C@H]1CN2CC[C@H]1C[C@@H]2[C@@H](C3=CC=NC4=CC=CC=C34)O	1467918721	-1	7.9854
90454	C=C[C@H]1CN2CC[C@H]1C[C@@H]2[C@H](C3=CC=NC4=CC=CC=C34)O	1467918721	-1	7.9854
101744	C=C[C@H]1CN2CC[C@H]1C[C@H]2[C@@H](C3=CC=NC4=CC=CC=C34)O	1467918721	-1	7.9854
5702153	C=C[C@H]1CN2CC[C@H]1C[C@@H]2[C@@H](C3=CC=NC4=CC=CC=C34)O	1467918721	-1	7.9854
90454	C=C[C@H]1CN2CC[C@H]1C[C@@H]2[C@H](C3=CC=NC4=CC=CC=C34)O	1467918721	-1	7.9854
101744	C=C[C@H]1CN2CC[C@H]1C[C@H]2[C@@H](C3=CC=NC4=CC=CC=C34)O	1467918721	-1	7.9854
5702153	C=C[C@H]1CN2CC[C@H]1C[C@@H]2[C@@H](C3=CC=NC4=CC=CC=C34)O	1467918721	-1	7.9854
90454	C=C[C@H]1CN2CC[C@H]1C[C@@H]2[C@H](C3=CC=NC4=CC=CC=C34)O	1467918721	-1	7.9854
4680	COC1=C(C=C(C=C1)CC2=NC=CC3=CC(=C(C=C32)OC)OC)OC	1467918769	-1	6.33898
5983	C[C@@]12CCN([C@@H]1N(C3=C2C=C(C=C3)OC(=O)NC)C)C	1467918795	-1	12.5989
5280953	CC1=NC=CC2=C1NC3=C2C=CC(=C3)OC	1467918831	-1	1.10065
5280954	CO[C@H]1[C@@H](C[C@@H]2CN3CCC4=C([C@H]3C[C@@H]2[C@@H]1C(=O)OC)NC5=C4C=CC(=C5)OC)OC(=O)/C=C/C6=CC(=C(C(=C6)OC)OC)OC	1467918856	-1	22
23760133	CC[C@@H]1[C@H](N2[C@H]3CC1C4[C@H]2CC5([C@H]3N(C6=CC=CC=C65)C)[C@@H]4O)O	1467918880	-1	1.60033
6280	C[C@H]1CC[C@H]2[C@@]([C@]3([C@H](C[C@]4([C@@H]5CC[C@H]6[C@]7([C@]5(C[C@]4([C@@H]3CN2C1)O)O[C@@]6([C@H](CC7)OC(=O)C8=CC(=C(C=C8)OC)OC)O)C)O)O)O)(C)O	1467918906	-1	1.03284
2256	CCNC1=NC(=NC(=N1)Cl)NC(C)C	1467918976	-1	4.32613
1203	C1C(C(OC2=CC(=CC(=C21)O)O)C3=CC(=C(C=C3)O)O)O	1467919099	-1	26.3777
9064	C1[C@@H]([C@H](OC2=CC(=CC(=C21)O)O)C3=CC(=C(C=C3)O)O)O	1467919099	-1	26.3777
1203	C1C(C(OC2=CC(=CC(=C21)O)O)C3=CC(=C(C=C3)O)O)O	1467919099	-1	26.3777
9064	C1[C@@H]([C@H](OC2=CC(=CC(=C21)O)O)C3=CC(=C(C=C3)O)O)O	1467919099	-1	26.3777
5280961	C1=CC(=CC=C1C2=COC3=CC(=CC(=C3C2=O)O)O)O	1467919119	-1	9.61538
5746	CC1=C(C(=O)C2=C(C1=O)N3C[C@H]4[C@@H]([C@@]3([C@@H]2COC(=O)N)OC)N4)N	1467920298	1	98
5702003	CC1=C(C(=O)C2=C(C1=O)N3CC4[C@H]([C@]3([C@H]2COC(=O)N)OC)N4)N	1467920298	-1	98
5746	CC1=C(C(=O)C2=C(C1=O)N3C[C@H]4[C@@H]([C@@]3([C@@H]2COC(=O)N)OC)N4)N	1467920298	1	98
5702003	CC1=C(C(=O)C2=C(C1=O)N3CC4[C@H]([C@]3([C@H]2COC(=O)N)OC)N4)N	1467920298	-1	98
16760040	C[C@H]1C[C@@H](C(=O)C(C1)[C@@H](CC2CC(=O)NC(=O)C2)O)C	1467920343	1	12.5283
6197	C[C@H]1C[C@@H](C(=O)[C@@H](C1)[C@@H](CC2CC(=O)NC(=O)C2)O)C	1467920343	1	12.5283
16760040	C[C@H]1C[C@@H](C(=O)C(C1)[C@@H](CC2CC(=O)NC(=O)C2)O)C	1467920343	1	12.5283
6197	C[C@H]1C[C@@H](C(=O)[C@@H](C1)[C@@H](CC2CC(=O)NC(=O)C2)O)C	1467920343	1	12.5283
4539	CCN1C=C(C(=O)C2=CC(=C(C=C21)N3CCNCC3)F)C(=O)O	1467920368	-1	13.009
11973017	C[C@@H]1[C@@H](CC[C@]2(C1CC[C@]3([C@H]2[C@@H](C[C@@H]\4[C@@]3(C[C@@H](/C4=C(/CCC=C(C)C)\C(=O)O)OC(=O)C)C)O)C)C)O	1467920451	-1	4.04076
3001077	C[C@H]1[C@@H]2CC[C@]3(C([C@]2(CC[C@H]1O)C)[C@@H](C[C@@H]\4[C@@]3(C[C@@H](/C4=C(\CCC=C(C)C)/C(=O)O)OC(=O)C)C)O)C	1467920451	-1	4.04076
11973017	C[C@@H]1[C@@H](CC[C@]2(C1CC[C@]3([C@H]2[C@@H](C[C@@H]\4[C@@]3(C[C@@H](/C4=C(/CCC=C(C)C)\C(=O)O)OC(=O)C)C)O)C)C)O	1467920451	-1	4.04076
3001077	C[C@H]1[C@@H]2CC[C@]3(C([C@]2(CC[C@H]1O)C)[C@@H](C[C@@H]\4[C@@]3(C[C@@H](/C4=C(\CCC=C(C)C)/C(=O)O)OC(=O)C)C)O)C	1467920451	-1	4.04076
1978	CCCC(=O)NC1=CC(=C(C=C1)OCC(CNC(C)C)O)C(=O)C	1467921426	-1	8
1986	CC(=O)NC1=NN=C(S1)S(=O)(=O)N	1467921449	-1	8.94872
1989	CC(=O)C1=CC=C(C=C1)S(=O)(=O)NC(=O)NC2CCCCC2	1467921460	-1	5.975
2022	C1=NC2=C(N1COCCO)NC(=NC2=O)N	1467921503	-1	14.328
5388973	CCC[C@@H]1C[C@H](N(C1)C)C(=O)N[C@@H]([C@@H]2[C@H]([C@@H]([C@H]([C@H](O2)SC)O)O)O)[C@@H](C)O	1467921515	-1	1.46721
5702079	CCC[C@@H]1C[C@H](N(C1)C)C(=O)N[C@H]([C@@H]2[C@@H]([C@@H]([C@H]([C@H](O2)SC)O)O)O)[C@H](C)O	1467921515	-1	1.46721
5388973	CCC[C@@H]1C[C@H](N(C1)C)C(=O)N[C@@H]([C@@H]2[C@H]([C@@H]([C@H]([C@H](O2)SC)O)O)O)[C@@H](C)O	1467921515	-1	1.46721
5702079	CCC[C@@H]1C[C@H](N(C1)C)C(=O)N[C@H]([C@@H]2[C@@H]([C@@H]([C@H]([C@H](O2)SC)O)O)O)[C@H](C)O	1467921515	-1	1.46721
16231	C1(=C(N=C(C(=N1)Cl)N)N)C(=O)N=C(N)N	1467921591	-1	29.9766
2160	CN(C)CCC=C1C2=CC=CC=C2CCC3=CC=CC=C31	1467921613	-1	5.6338
2162	CCOC(=O)C1=C(NC(=C(C1C2=CC=CC=C2Cl)C(=O)OC)C)COCCN	1467921624	-1	42.4353
2247	COC1=CC=C(C=C1)CCN2CCC(CC2)NC3=NC4=CC=CC=C4N3CC5=CC=C(C=C5)F	1467921667	-1	8.5974
2247	COC1=CC=C(C=C1)CCN2CCC(CC2)NC3=NC4=CC=CC=C4N3CC5=CC=C(C=C5)F	1467921667	1	8.5974
2247	COC1=CC=C(C=C1)CCN2CCC(CC2)NC3=NC4=CC=CC=C4N3CC5=CC=C(C=C5)F	1467921667	-1	8.5974
2247	COC1=CC=C(C=C1)CCN2CCC(CC2)NC3=NC4=CC=CC=C4N3CC5=CC=C(C=C5)F	1467921667	1	8.5974
2265	CN1C=NC(=C1SC2=NC=NC3=C2NC=N3)[N+](=O)[O-]	1467921701	1	20
5742832	C[C@H]1[C@@H](C(=O)N1S(=O)(=O)O)NC(=O)/C(=N\OC(C)(C)C(=O)O)/C2=CSC(=N2)N	1467921734	-1	26.2397
20469	C[C@H]1C[C@H]2[C@@H]3CCC4=CC(=O)C=C[C@@]4([C@]3([C@H](C[C@@]2([C@]1(C(=O)CO)O)C)O)Cl)C	1467921745	-1	47.1564
5362124	CCOC(=O)[C@H](CCC1=CC=CC=C1)N[C@H]2CCC3=CC=CC=C3N(C2=O)CC(=O)O	1467921755	-1	7.49061
5743	C[C@@H]1C[C@H]2[C@@H]3CCC4=CC(=O)C=C[C@@]4([C@]3([C@H](C[C@@]2([C@]1(C(=O)CO)O)C)O)F)C	1467921786	-1	60
9782	C[C@H]1C[C@H]2[C@@H]3CCC4=CC(=O)C=C[C@@]4([C@]3([C@H](C[C@@]2([C@]1(C(=O)CO)O)C)O)F)C	1467921786	-1	60
5743	C[C@@H]1C[C@H]2[C@@H]3CCC4=CC(=O)C=C[C@@]4([C@]3([C@H](C[C@@]2([C@]1(C(=O)CO)O)C)O)F)C	1467921786	-1	60
9782	C[C@H]1C[C@H]2[C@@H]3CCC4=CC(=O)C=C[C@@]4([C@]3([C@H](C[C@@]2([C@]1(C(=O)CO)O)C)O)F)C	1467921786	-1	60
2369	CC(C)NCC(COC1=CC=C(C=C1)CCOCC2CC2)O	1467921794	-1	2
5284353	CC(C)C[C@H]1C(=O)N2CCC[C@H]2[C@]3(N1C(=O)[C@](O3)(C(C)C)NC(=O)[C@H]4CN(C5CC6=C(NC7=CC=CC(=C67)C5=C4)Br)C)O	1467921857	-1	21
5702015	CC(C)CC1C(=O)N2CCC[C@H]2C3(N1C(=O)[C@](O3)(C(C)C)NC(=O)C4CN([C@@H]5CC6=C(NC7=CC=CC(=C67)C5=C4)Br)C)O	1467921857	-1	21
31101	CC(C)C[C@H]1C(=O)N2CCC[C@H]2[C@]3(N1C(=O)[C@](O3)(C(C)C)NC(=O)[C@H]4CN([C@@H]5CC6=C(NC7=CC=CC(=C67)C5=C4)Br)C)O	1467921857	-1	21
5284353	CC(C)C[C@H]1C(=O)N2CCC[C@H]2[C@]3(N1C(=O)[C@](O3)(C(C)C)NC(=O)[C@H]4CN(C5CC6=C(NC7=CC=CC(=C67)C5=C4)Br)C)O	1467921857	-1	21
5702015	CC(C)CC1C(=O)N2CCC[C@H]2C3(N1C(=O)[C@](O3)(C(C)C)NC(=O)C4CN([C@@H]5CC6=C(NC7=CC=CC(=C67)C5=C4)Br)C)O	1467921857	-1	21
31101	CC(C)C[C@H]1C(=O)N2CCC[C@H]2[C@]3(N1C(=O)[C@](O3)(C(C)C)NC(=O)[C@H]4CN([C@@H]5CC6=C(NC7=CC=CC(=C67)C5=C4)Br)C)O	1467921857	-1	21
5284353	CC(C)C[C@H]1C(=O)N2CCC[C@H]2[C@]3(N1C(=O)[C@](O3)(C(C)C)NC(=O)[C@H]4CN(C5CC6=C(NC7=CC=CC(=C67)C5=C4)Br)C)O	1467921857	-1	21
5702015	CC(C)CC1C(=O)N2CCC[C@H]2C3(N1C(=O)[C@](O3)(C(C)C)NC(=O)C4CN([C@@H]5CC6=C(NC7=CC=CC(=C67)C5=C4)Br)C)O	1467921857	-1	21
31101	CC(C)C[C@H]1C(=O)N2CCC[C@H]2[C@]3(N1C(=O)[C@](O3)(C(C)C)NC(=O)[C@H]4CN([C@@H]5CC6=C(NC7=CC=CC(=C67)C5=C4)Br)C)O	1467921857	-1	21
6834	CN(C)CCC(C1=CC=C(C=C1)Br)C2=CC=CC=N2	1467921868	-1	10.9381
444	CC(C(=O)C1=CC(=CC=C1)Cl)NC(C)(C)C	1467921878	-1	7
2477	C1CCC2(C1)CC(=O)N(C(=O)C2)CCCCN3CCN(CC3)C4=NC=CC=N4	1467921888	-1	14
2554	C1=CC=C2C(=C1)C=CC3=CC=CC=C3N2C(=O)N	1467921939	-1	14.2353
2564	CN(C)CCOC(C1=CC=C(C=C1)Cl)C2=CC=CC=N2	1467921969	-1	9.35384
2583	CC(C)(C)NCC(COC1=CC=CC2=C1CCC(=O)N2)O	1467922000	-1	3.31987
2585	COC1=CC=CC=C1OCCNCC(COC2=CC=CC3=C2C4=CC=CC=C4N3)O	1467922010	-1	4.60699
456255	CN1C(=NN=N1)SCC2=C(N3[C@@H]([C@@H](C3=O)NC(=O)[C@@H](C4=CC=CC=C4)O)SC2)C(=O)O	1467922052	-1	16.6634
5362065	C=CC1=C(N2[C@@H]([C@@H](C2=O)NC(=O)/C(=N\OCC(=O)O)/C3=CSC(=N3)N)SC1)C(=O)O	1467922073	-1	34.9341
44187	CCN1CCN(C(=O)C1=O)C(=O)N[C@H](C2=CC=C(C=C2)O)C(=O)N[C@H]3[C@@H]4N(C3=O)C(=C(CS4)CSC5=NN=NN5C)C(=O)O	1467922094	-1	23.2689
43507	C1C(=C(N2[C@H](S1)[C@@H](C2=O)NC(=O)CC3=CC=CC=C3CN)C(=O)O)CSC4=NN=NN4CC(=O)O	1467922104	-1	15.0367
5742673	CC(=O)OCC1=C(N2[C@@H]([C@@H](C2=O)NC(=O)/C(=N\OC)/C3=CSC(=N3)N)SC1)C(=O)O	1467922114	-1	38.3949
5479527	CC(=O)OCC1=C(N2[C@@H]([C@@H](C2=O)NC(=O)/C(=N/OC)/C3=CSC(=N3)N)SC1)C(=O)O	1467922114	-1	38.3949
5742673	CC(=O)OCC1=C(N2[C@@H]([C@@H](C2=O)NC(=O)/C(=N\OC)/C3=CSC(=N3)N)SC1)C(=O)O	1467922114	-1	38.3949
5479527	CC(=O)OCC1=C(N2[C@@H]([C@@H](C2=O)NC(=O)/C(=N/OC)/C3=CSC(=N3)N)SC1)C(=O)O	1467922114	-1	38.3949
5479529	CO/N=C(/C1=CC=CO1)\C(=O)N[C@H]2[C@@H]3N(C2=O)C(=C(CS3)COC(=O)N)C(=O)O	1467922212	-1	30.4921
2725	CN(C)CCC(C1=CC=C(C=C1)Cl)C2=CC=CC=N2	1467922284	-1	7.27103
716121	CN(C)CC[C@H](C1=CC=C(C=C1)Cl)C2=CC=CC=N2	1467922284	-1	7.27103
2725	CN(C)CCC(C1=CC=C(C=C1)Cl)C2=CC=CC=N2	1467922284	-1	7.27103
716121	CN(C)CC[C@H](C1=CC=C(C=C1)Cl)C2=CC=CC=N2	1467922284	-1	7.27103
5311047	CO[C@@H]1CN(CC[C@@H]1NC(=O)C2=CC(=C(C=C2OC)N)Cl)CCCOC3=CC=C(C=C3)F	1467922318	-1	16
26987	C[C@@](C1=CC=CC=C1)(C2=CC=C(C=C2)Cl)OCC[C@H]3CCCN3C	1467922355	-1	4.67299
6602476	CCC[C@@H]1C[C@H](N(C1)C)C(=O)N[C@@H](C2[C@@H]([C@@H]([C@H]([C@H](O2)SC)O)O)O)[C@H](C)Cl	1467922365	-1	16.3652
2794	CC(C)N=C1C=C2C(=NC3=CC=CC=C3N2C4=CC=C(C=C4)Cl)C=C1NC5=CC=C(C=C5)Cl	1467922376	-1	22.0594
2794	CC(C)N=C1C=C2C(=NC3=CC=CC=C3N2C4=CC=C(C=C4)Cl)C=C1NC5=CC=C(C=C5)Cl	1467922376	1	22.0594
2794	CC(C)N=C1C=C2C(=NC3=CC=CC=C3N2C4=CC=C(C=C4)Cl)C=C1NC5=CC=C(C=C5)Cl	1467922376	-1	22.0594
2794	CC(C)N=C1C=C2C(=NC3=CC=CC=C3N2C4=CC=C(C=C4)Cl)C=C1NC5=CC=C(C=C5)Cl	1467922376	1	22.0594
1548953	CCN(CC)CCOC1=CC=C(C=C1)/C(=C(\C2=CC=CC=C2)/Cl)/C3=CC=CC=C3	1467922396	-1	34
1548955	CCN(CC)CCOC1=CC=C(C=C1)/C(=C(/C2=CC=CC=C2)\Cl)/C3=CC=CC=C3	1467922396	-1	34
1548953	CCN(CC)CCOC1=CC=C(C=C1)/C(=C(\C2=CC=CC=C2)/Cl)/C3=CC=CC=C3	1467922396	-1	34
1548955	CCN(CC)CCOC1=CC=C(C=C1)/C(=C(/C2=CC=CC=C2)\Cl)/C3=CC=CC=C3	1467922396	-1	34
6098	CC1=C(C(=NO1)C2=CC=CC=C2Cl)C(=O)N[C@H]3[C@@H]4N(C3=O)[C@H](C(S4)(C)C)C(=O)O	1467922439	-1	20.859
6726	CN1CCN(CC1)C(C2=CC=CC=C2)C3=CC=CC=C3	1467922490	-1	0
2895	CN(C)CCC=C1C2=CC=CC=C2C=CC3=CC=CC=C31	1467922500	-1	7.6338
2905	CN(C)CCOC(=O)C(C1=CC=CC=C1)C2(CCCC2)O	1467922510	-1	6.61195
2913	CN1CCC(=C2C3=CC=CC=C3C=CC4=CC=CC=C42)CC1	1467922529	-1	8
28417	C[C@]12CC[C@H]3[C@H]([C@@H]1CC[C@]2(C#C)O)CCC4=CC5=C(C[C@]34C)C=NO5	1467922549	-1	4
5702031	C[C@]12CCC3C(C1CC[C@]2(C#C)O)CCC4=CC5=C(C[C@]34C)C=NO5	1467922549	-1	4
28417	C[C@]12CC[C@H]3[C@H]([C@@H]1CC[C@]2(C#C)O)CCC4=CC5=C(C[C@]34C)C=NO5	1467922549	-1	4
5702031	C[C@]12CCC3C(C1CC[C@]2(C#C)O)CCC4=CC5=C(C[C@]34C)C=NO5	1467922549	-1	4
6914273	C1C(=O)NC(=O)N1/N=C/C2=CC=C(O2)C3=CC=C(C=C3)[N+](=O)[O-]	1467922557	-1	45.549
2973	CC(=O)N(CCCCCNC(=O)CCC(=O)N(CCCCCNC(=O)CCC(=O)N(CCCCCN)O)O)O	1467922567	-1	46.7541
5360696	CN1CC[C@@]23CCCC[C@@H]2[C@@H]1CC4=C3C=C(C=C4)OC	1467922619	-1	0
5702040	CN1CC[C@@]23CCCC[C@H]2[C@@H]1CC4=C3C=C(C=C4)OC	1467922619	-1	0
5360696	CN1CC[C@@]23CCCC[C@@H]2[C@@H]1CC4=C3C=C(C=C4)OC	1467922619	-1	0
5702040	CN1CC[C@@]23CCCC[C@H]2[C@@H]1CC4=C3C=C(C=C4)OC	1467922619	-1	0
3016	CN1C(=O)CN=C(C2=C1C=CC(=C2)Cl)C3=CC=CC=C3	1467922629	-1	15.3168
3019	CC1=NS(=O)(=O)C2=C(N1)C=CC(=C2)Cl	1467922640	-1	6
18381	CC1=C(C(=NO1)C2=C(C=CC=C2Cl)Cl)C(=O)N[C@H]3[C@@H]4N(C3=O)[C@H](C(S4)(C)C)C(=O)O	1467922651	-1	23.859
2756	CC1=C(N=CN1)CSCCNC(=NC)NC#N	1467922672	-1	8
5702041	C[C@@H]1[C@H]([C@H](C[C@@H](O1)O[C@@H]2[C@H](O[C@H](C[C@@H]2O)O[C@@H]3[C@H](O[C@H](C[C@@H]3O)O[C@H]4CC[C@]5([C@@H](C4)CCC6C5CC[C@]7([C@@]6(CC[C@@H]7C8=CC(=O)OC8)O)C)C)C)C)O)O	1467922702	1	43
2724385	C[C@@H]1[C@H]([C@H](C[C@@H](O1)O[C@@H]2[C@H](O[C@H](C[C@@H]2O)O[C@@H]3[C@H](O[C@H](C[C@@H]3O)O[C@H]4CC[C@]5([C@@H](C4)CC[C@@H]6[C@@H]5C[C@H]([C@]7([C@@]6(CC[C@@H]7C8=CC(=O)OC8)O)C)O)C)C)C)O)O	1467922715	1	62
5702042	C[C@@H]1[C@H]([C@H](C[C@@H](O1)O[C@@H]2[C@H](O[C@H](C[C@@H]2O)O[C@@H]3[C@H](O[C@H](C[C@@H]3O)O[C@H]4CC[C@]5([C@@H](C4)CCC6C5C[C@H]([C@]7([C@@]6(CC[C@@H]7C8=CC(=O)OC8)O)C)O)C)C)C)O)O	1467922715	1	62
2724385	C[C@@H]1[C@H]([C@H](C[C@@H](O1)O[C@@H]2[C@H](O[C@H](C[C@@H]2O)O[C@@H]3[C@H](O[C@H](C[C@@H]3O)O[C@H]4CC[C@]5([C@@H](C4)CC[C@@H]6[C@@H]5C[C@H]([C@]7([C@@]6(CC[C@@H]7C8=CC(=O)OC8)O)C)O)C)C)C)O)O	1467922715	1	62
5702042	C[C@@H]1[C@H]([C@H](C[C@@H](O1)O[C@@H]2[C@H](O[C@H](C[C@@H]2O)O[C@@H]3[C@H](O[C@H](C[C@@H]3O)O[C@H]4CC[C@]5([C@@H](C4)CCC6C5C[C@H]([C@]7([C@@]6(CC[C@@H]7C8=CC(=O)OC8)O)C)O)C)C)C)O)O	1467922715	1	62
198107	CC(=O)O[C@H]1[C@H](SC2=CC=CC=C2N(C1=O)CCN(C)C)C3=CC=C(C=C3)OC	1467922741	-1	22
39186	CC(=O)O[C@@H]1[C@@H](SC2=CC=CC=C2N(C1=O)CCN(C)C)C3=CC=C(C=C3)OC	1467922741	-1	22
3076	CC(=O)OC1C(SC2=CC=CC=C2N(C1=O)CCN(C)C)C3=CC=C(C=C3)OC	1467922741	-1	22
198107	CC(=O)O[C@H]1[C@H](SC2=CC=CC=C2N(C1=O)CCN(C)C)C3=CC=C(C=C3)OC	1467922741	-1	22
39186	CC(=O)O[C@@H]1[C@@H](SC2=CC=CC=C2N(C1=O)CCN(C)C)C3=CC=C(C=C3)OC	1467922741	-1	22
3076	CC(=O)OC1C(SC2=CC=CC=C2N(C1=O)CCN(C)C)C3=CC=C(C=C3)OC	1467922741	-1	22
198107	CC(=O)O[C@H]1[C@H](SC2=CC=CC=C2N(C1=O)CCN(C)C)C3=CC=C(C=C3)OC	1467922741	-1	22
39186	CC(=O)O[C@@H]1[C@@H](SC2=CC=CC=C2N(C1=O)CCN(C)C)C3=CC=C(C=C3)OC	1467922741	-1	22
3076	CC(=O)OC1C(SC2=CC=CC=C2N(C1=O)CCN(C)C)C3=CC=C(C=C3)OC	1467922741	-1	22
3055	C1CCN(CC1)CCCC(C2=CC=CC=C2)(C3=CC=CC=C3)O	1467922760	-1	0.789474
3105	CC(C)(C)C(=O)OC1=C(C=C(C=C1)C(CNC)O)OC(=O)C(C)(C)C	1467922770	-1	0.886792
3114	CC(C)N(CCC(C1=CC=CC=C1)(C2=CC=CC=N2)C(=O)N)C(C)C	1467922781	-1	6.69231
36811	CC(CCC1=CC=C(C=C1)O)NCCC2=CC(=C(C=C2)O)O	1467922791	-1	17.8321
3157	COC1=C(C=C2C(=C1)C(=NC(=N2)N3CCN(CC3)C(=O)C4COC5=CC=CC=C5O4)N)OC	1467922812	-1	17
667477	CN(C)CC/C=C/1\C2=CC=CC=C2COC3=CC=CC=C31	1467922822	-1	4.6338
667468	CN(C)CC/C=C\1/C2=CC=CC=C2COC3=CC=CC=C31	1467922822	-1	4.6338
667477	CN(C)CC/C=C/1\C2=CC=CC=C2COC3=CC=CC=C31	1467922822	-1	4.6338
667468	CN(C)CC/C=C\1/C2=CC=CC=C2COC3=CC=CC=C31	1467922822	-1	4.6338
3229	CCN1C=C(C(=O)C2=CC(=C(N=C21)N3CCNCC3)F)C(=O)O	1467922904	-1	16.8493
3279	CCC(CO)NCCNC(CC)CO	1467922932	-1	3.48837
3308	CCC1=CC=CC2=C1NC3=C2CCOC3(CC)CC(=O)O	1467922989	-1	5.7931
3356	C1CCNC(C1)CNC(=O)C2=C(C=CC(=C2)OCC(F)(F)F)OCC(F)(F)F	1467923028	-1	36
5702174	CC1(O[C@@H]2CC3C4C[C@@H](C5=CC(=O)C=CC5(C4C(CC3([C@@]2(O1)C(=O)CO)C)O)C)F)C	1467923051	-1	50.9381
9642	CC(=O)OCC(=O)[C@@]12[C@@H](C[C@@H]3[C@@]1(C[C@@H]([C@]4([C@H]3C[C@@H](C5=CC(=O)C=C[C@@]54C)F)F)O)C)OC(O2)(C)C	1467923072	-1	59.6098
6710662	CC(=O)OCC(=O)[C@@]12[C@@H](CC3[C@@]1(C[C@@H]([C@]4(C3C[C@@H](C5=CC(=O)C=C[C@@]54C)F)F)O)C)OC(O2)(C)C	1467923072	-1	59.6098
9642	CC(=O)OCC(=O)[C@@]12[C@@H](C[C@@H]3[C@@]1(C[C@@H]([C@]4([C@H]3C[C@@H](C5=CC(=O)C=C[C@@]54C)F)F)O)C)OC(O2)(C)C	1467923072	-1	59.6098
6710662	CC(=O)OCC(=O)[C@@]12[C@@H](CC3[C@@]1(C[C@@H]([C@]4(C3C[C@@H](C5=CC(=O)C=C[C@@]54C)F)F)O)C)OC(O2)(C)C	1467923072	-1	59.6098
3372	C1CN(CCN1CCCN2C3=CC=CC=C3SC4=C2C=C(C=C4)C(F)(F)F)CCO	1467923080	-1	25
1548972	CC(C)N1C2=CC=CC=C2C(=C1/C=C/[C@@H](C[C@@H](CC(=O)O)O)O)C3=CC=C(C=C3)F	1467923090	1	12
3440	C1=COC(=C1)CNC2=CC(=C(C=C2C(=O)O)S(=O)(=O)N)Cl	1467923110	-1	10.375
3463	CC1=CC(=C(C=C1)C)OCCCC(C)(C)C(=O)O	1467923119	-1	3.92082
3488	COC1=C(C=C(C=C1)Cl)C(=O)NCCC2=CC=C(C=C2)S(=O)(=O)NC(=O)NC3CCCCC3	1467923128	-1	8.975
5353646	C1=CC(=C(C(=C1)Cl)/C=N\N=C(N)N)Cl	1467923234	-1	13.4933
3519	C1=CC(=C(C(=C1)Cl)CC(=O)N=C(N)N)Cl	1467923264	-1	12.3182
3637	C1=CC=C2C(=C1)C=NN=C2NN	1467923274	-1	7.96667
3658	C1CN(CCN1CCOCCO)C(C2=CC=CC=C2)C3=CC=C(C=C3)Cl	1467923327	-1	7
3762	CCC(C(C1=CC(=C(C=C1)O)O)O)NC(C)C	1467923380	-1	27.086
3767	C1=CN=CC=C1C(=O)NN	1467923390	-1	12.5
3826	C1CN2C(=CC=C2C(=O)C3=CC=CC=C3)C1C(=O)O	1467923431	-1	3
3869	CC(CCC1=CC=CC=C1)NCC(C2=CC(=C(C=C2)O)C(=O)N)O	1467923441	-1	1.90551
3913	C1CSC2=NC(CN21)C3=CC=CC=C3	1467923484	-1	0
26879	C1CSC2=N[C@H](CN21)C3=CC=CC=C3	1467923484	-1	0
3913	C1CSC2=NC(CN21)C3=CC=CC=C3	1467923484	-1	0
26879	C1CSC2=N[C@H](CN21)C3=CC=CC=C3	1467923484	-1	0
3961	CCCCC1=NC(=C(N1CC2=CC=C(C=C2)C3=CC=CC=C3C4=NNN=N4)CO)Cl	1467923494	-1	5
3676	CCN(CC)CC(=O)NC1=C(C=CC=C1C)C	1467923504	-1	10.0333
53232	CC[C@H](C)C(=O)O[C@H]1C[C@H](C=C2[C@H]1[C@H]([C@H](C=C2)C)CC[C@@H]3C[C@H](CC(=O)O3)O)C	1467923515	-1	16
53232	CC[C@H](C)C(=O)O[C@H]1C[C@H](C=C2[C@H]1[C@H]([C@H](C=C2)C)CC[C@@H]3C[C@H](CC(=O)O3)O)C	1467923515	1	16
53232	CC[C@H](C)C(=O)O[C@H]1C[C@H](C=C2[C@H]1[C@H]([C@H](C=C2)C)CC[C@@H]3C[C@H](CC(=O)O3)O)C	1467923515	-1	16
53232	CC[C@H](C)C(=O)O[C@H]1C[C@H](C=C2[C@H]1[C@H]([C@H](C=C2)C)CC[C@@H]3C[C@H](CC(=O)O3)O)C	1467923515	1	16
3948	CCN1C=C(C(=O)C2=CC(=C(C(=C21)F)N3CCNC(C3)C)F)C(=O)O	1467923541	-1	12.8305
3955	CN(C)C(=O)C(CCN1CCC(CC1)(C2=CC=C(C=C2)Cl)O)(C3=CC=CC=C3)C4=CC=CC=C4	1467923561	-1	16
1480	C1=C(C(=CC(=C1Cl)Cl)Cl)OCC(=O)O	1467923760	-1	9.94861
3964	CN1CCN(CC1)C2=NC3=CC=CC=C3OC4=C2C=C(C=C4)Cl	1467923807	-1	9.8773
4011	CNCCCC12CCC(C3=CC=CC=C31)C4=CC=CC=C24	1467923840	-1	2
2733526	CC/C(=C(\C1=CC=CC=C1)/C2=CC=C(C=C2)OCCN(C)C)/C3=CC=CC=C3	1467923850	-1	34
4034	CC1=CC(=CC=C1)CN2CCN(CC2)C(C3=CC=CC=C3)C4=CC=C(C=C4)Cl	1467923931	-1	3
4037	CC1=C(C(=C(C=C1)Cl)NC2=CC=CC=C2C(=O)O)Cl	1467923942	-1	14.8205
10631	C[C@H]1C[C@@H]2[C@H](CC[C@]3([C@H]2CC[C@@]3(C(=O)C)O)C)[C@@]4(C1=CC(=O)CC4)C	1467923964	-1	30.6971
5401	COC1=C(C=C2C(=C1)C(=NC(=N2)N3CCN(CC3)C(=O)C4CCCO4)N)OC	1467924035	-1	17
5403	CC(C)(C)NCC(C1=CC(=CC(=C1)O)O)O	1467924057	-1	10.8758
5430	C1=CC=C2C(=C1)NC(=N2)C3=CSC=N3	1467924081	-1	2
5430	C1=CC=C2C(=C1)NC(=N2)C3=CSC=N3	1467924081	1	2
5430	C1=CC=C2C(=C1)NC(=N2)C3=CSC=N3	1467924081	-1	2
5430	C1=CC=C2C(=C1)NC(=N2)C3=CSC=N3	1467924081	1	2
5472	C1CN(CC2=C1SC=C2)CC3=CC=CC=C3Cl	1467924111	-1	5.10053
33624	CC(C)(C)NC[C@@H](COC1=NSN=C1N2CCOCC2)O	1467924122	-1	4.98113
168613	CC(C)(C)NC[C@H](COC1=NSN=C1N2CCOCC2)O	1467924122	-1	4.98113
33624	CC(C)(C)NC[C@@H](COC1=NSN=C1N2CCOCC2)O	1467924122	-1	4.98113
168613	CC(C)(C)NC[C@H](COC1=NSN=C1N2CCOCC2)O	1467924122	-1	4.98113
38945	CC1=C(C(=CC=C1)C)NC(=O)C(C)N	1467924133	-1	8.27044
4078	CN1CCCCC1CCN2C3=CC=CC=C3SC4=C2C=C(C=C4)S(=O)C	1467924143	-1	14
5504	C1CN=C(N1)CC2=CC=CC=C2	1467924174	-1	0
5505	CCCCNC(=O)NS(=O)(=O)C1=CC=C(C=C1)C	1467924185	-1	6.0625
5509	CC1=CC=C(C=C1)C(=O)C2=CC=C(N2C)CC(=O)O	1467924195	-1	3
26070	C1[C@@H]([C@H]1N)C2=CC=CC=C2	1467924226	-1	0
5702124	C1[C@H](C1N)C2=CC=CC=C2	1467924226	-1	0
26070	C1[C@@H]([C@H]1N)C2=CC=CC=C2	1467924226	-1	0
5702124	C1[C@H](C1N)C2=CC=CC=C2	1467924226	-1	0
5533	C1CN(CCN1CCCN2C(=O)N3C=CC=CC3=N2)C4=CC(=CC=C4)Cl	1467924236	-1	10.1707
5566	CN1CCN(CC1)CCCN2C3=CC=CC=C3SC4=C2C=C(C=C4)C(F)(F)F	1467924312	-1	30
5572	C1CCC(CC1)C(CCN2CCCCC2)(C3=CC=CC=C3)O	1467924323	-1	0
6087	CC1([C@@H](N2[C@H](S1)[C@@H](C2=O)NC(=O)C3=C(C=CC=C3OC)OC)C(=O)O)C	1467924365	-1	15.88
5577	CN(C)CCOC1=CC=C(C=C1)CNC(=O)C2=CC(=C(C(=C2)OC)OC)OC	1467924376	-1	9.8209
5587	CN(C)CCN(CC1=CC=CC=C1)C2=CC=CC=N2	1467924386	-1	5.29184
5656	CN(C)CC(C1=CC=C(C=C1)OC)C2(CCCCC2)O	1467924433	-1	2
2520	CC(C)C(CCCN(C)CCC1=CC(=C(C=C1)OC)OC)(C#N)C2=CC(=C(C=C2)OC)OC	1467924443	-1	18
1349907	CN1C=CNC1=S	1467924466	-1	1
9681	CC[C@@H](CO)NC(=O)[C@H]1CN([C@@H]2CC3=CN(C4=CC=CC(=C34)C2=C1)C)C	1467924532	-1	1.73744
13342	CC[C@@]1(C[C@H]2C[C@@](C3=C(CCN(C2)C1)C4=CC=CC=C4N3)(C5=C(C=C6C(=C5)[C@]78CCN9[C@H]7[C@@](C=CC9)([C@H]([C@@]([C@@H]8N6C)(C(=O)OC)O)OC(=O)C)CC)OC)C(=O)OC)O	1467924542	1	26
4171	CC(C)NCC(COC1=CC=C(C=C1)CCOC)O	1467924554	-1	1
4173	CC1=NC=C(N1CCO)[N+](=O)[O-]	1467924564	-1	14.3506
24058669	CC[C@@]1(C[C@@H]2C[C@@](C3=C(CCN(C2)C1)C4=CC=CC=C4N3)(C5=C(C=C6C(=C5)[C@]78CCN9[C@H]7[C@](C=CC9)([C@H]([C@@]([C@@H]8N6C=O)(C(=O)OC)O)OC(=O)C)CC)OC)C(=O)OC)O	1467924573	1	40
4174	CC(C)(C1=CN=CC=C1)C(=O)C2=CN=CC=C2	1467924586	-1	5.54545
35370	CC1=CN(C(=O)NC1=O)[C@H]2C[C@@H]([C@H](O2)CO)N=[N+]=[N-]	1467924643	-1	31.7432
5732	CC1=CC=C(C=C1)C2=C(N3C=C(C=CC3=N2)C)CC(=O)N(C)C	1467924746	-1	2.46479
4178	CC1=C(C(=CC=C1)C)OCC(C)N	1467924756	-1	0
23897	CCC1=C(NC2=C1C(=O)C(CC2)CN3CCOCC3)C	1467924824	-1	1.60424
33572	C[C@@H]([C@@H](C1=CC=C(C=C1)O)O)NCCC2=CC=C(C=C2)O	1467924868	-1	2.51709
31729	CC(C(C1=CC=C(C=C1)O)O)NCCC2=CC=C(C=C2)O	1467924868	-1	2.51709
33572	C[C@@H]([C@@H](C1=CC=C(C=C1)O)O)NCCC2=CC=C(C=C2)O	1467924868	-1	2.51709
31729	CC(C(C1=CC=C(C=C1)O)O)NCCC2=CC=C(C=C2)O	1467924868	-1	2.51709
26757	C[C@H](CC1=CC=CC=C1)N(C)CC#C	1467924899	-1	3
8982	CCOC1=C(C2=CC=CC=C2C=C1)C(=O)N[C@H]3[C@@H]4N(C3=O)[C@H](C(S4)(C)C)C(=O)O	1467924930	-1	16.859
5311304	C1CC(C1)CN2CC[C@]34[C@@H]5[C@H](CC[C@]3([C@H]2CC6=C4C(=C(C=C6)O)O5)O)O	1467924941	-1	4
5360630	C1CC(C1)CN2CC[C@]34C5[C@H](CC[C@]3([C@H]2CC6=C4C(=C(C=C6)O)O5)O)O	1467924941	-1	4
5311304	C1CC(C1)CN2CC[C@]34[C@@H]5[C@H](CC[C@]3([C@H]2CC6=C4C(=C(C=C6)O)O5)O)O	1467924941	-1	4
5360630	C1CC(C1)CN2CC[C@]34C5[C@H](CC[C@]3([C@H]2CC6=C4C(=C(C=C6)O)O5)O)O	1467924941	-1	4
5284596	C=CCN1CC[C@]23[C@@H]4C(=O)CC[C@]2([C@H]1CC5=C3C(=C(C=C5)O)O4)O	1467924951	-1	12.1955
5702090	C=CCN1CC[C@]23C4C(=O)CC[C@]2([C@H]1CC5=C3C(=C(C=C5)O)O4)O	1467924951	-1	12.1955
5284596	C=CCN1CC[C@]23[C@@H]4C(=O)CC[C@]2([C@H]1CC5=C3C(=C(C=C5)O)O4)O	1467924951	-1	12.1955
5702090	C=CCN1CC[C@]23C4C(=O)CC[C@]2([C@H]1CC5=C3C(=C(C=C5)O)O4)O	1467924951	-1	12.1955
5360515	C1CC1CN2CC[C@]34[C@@H]5C(=O)CC[C@]3([C@H]2CC6=C4C(=C(C=C6)O)O5)O	1467924961	-1	8
4456	CN(C)C(=O)OC1=CC=CC(=C1)[N+](C)(C)C	1467925013	-1	7.6375
5212	CCCC1=NN(C2=C1NC(=NC2=O)C3=C(C=CC(=C3)S(=O)(=O)N4CCN(CC4)C)OCC)C	1467925023	-1	3.53
4463	CC1=C2C(=NC=C1)N(C3=C(C=CC=N3)C(=O)N2)C4CC4	1467925044	-1	4
4485	CC1=C(C(C(=C(N1)C)C(=O)OC)C2=CC=CC=C2[N+](=O)[O-])C(=O)OC	1467925065	-1	52
4497	CC1=C(C(C(=C(N1)C)C(=O)OC(C)C)C2=CC(=CC=C2)[N+](=O)[O-])C(=O)OCCOC	1467925075	-1	56.6873
6604200	C1C(=O)NC(=O)N1/N=C/C2=CC=C(O2)[N+](=O)[O-]	1467925085	-1	46
5353831	CN/C(=C/[N+](=O)[O-])/NCCSCC1=CSC(=N1)CN(C)C	1467925105	-1	11
4543	CNCCC=C1C2=CC=CC=C2CCC3=CC=CC=C31	1467925156	-1	3
5253	CC(C)NCC(C1=CC=C(C=C1)NS(=O)(=O)C)O	1467925472	-1	7.30667
5833	CC(=O)S[C@@H]1CC2=CC(=O)CC[C@@]2([C@@H]3[C@@H]1[C@@H]4CC[C@]5([C@]4(CC3)C)CCC(=O)O5)C	1467925482	-1	34.2288
5329	CC1=CC(=NO1)NS(=O)(=O)C2=CC=C(C=C2)N	1467925536	-1	14.4408
5342	C1=CC=C(C=C1)N2C(=O)C(C(=O)N2C3=CC=CC=C3)CCS(=O)C4=CC=CC=C4	1467925560	-1	6.07005
5344	CC1=C(ON=C1C)NS(=O)(=O)C2=CC=C(C=C2)N	1467925571	-1	8.53855
5358	CNS(=O)(=O)CC1=CC2=C(C=C1)NC=C2CCN(C)C	1467925581	-1	4.41558
5359	CC(C1=CC=C(C=C1)C(=O)C2=CC=CS2)C(=O)O	1467925591	-1	1.70213
4583	CC1COC2=C3N1C=C(C(=O)C3=CC(=C2N4CCN(CC4)C)F)C(=O)O	1467925601	-1	11.4833
4594	CC1=CN=C(C(=C1OC)C)CS(=O)C2=NC3=C(N2)C=C(C=C3)OC	1467925631	-1	5.58389
4595	CC1=NC=CN1CC2CCC3=C(C2=O)C4=CC=CC=C4N3C	1467925641	-1	2
6602444	CC1=C(C(=NO1)C2=CC=CC=C2)C(=O)NC3[C@@H]4N(C3=O)[C@H](C(S4)(C)C)C(=O)O	1467925738	-1	15.859
237	CCN(CC)CCCC(C)NC1=C2C=C(C=CC2=NC3=C1C=CC(=C3)Cl)OC	1467925782	-1	20.9136
6307	CCC1NC2=CC(=C(C=C2C(=O)N1)S(=O)(=O)N)Cl	1467925813	-1	9.9723
4634	CCN(CC)CC#CCOC(=O)C(C1CCCCC1)(C2=CC=CC=C2)O	1467925968	-1	13.1508
4636	CC1=CC(=C(C(=C1CC2=NCCN2)C)O)C(C)(C)C	1467925999	-1	3.5654
4891	C1CCC(CC1)C(=O)N2CC3C4=CC=CC=C4CCN3C(=O)C2	1467926020	-1	2.98093
4909	CCC1(C(=O)NCNC1=O)C2=CC=CC=C2	1467926065	-1	6
4911	CCCN(CCC)S(=O)(=O)C1=CC=C(C=C1)C(=O)O	1467926076	-1	4.87097
4914	CCN(CC)CCOC(=O)C1=CC=C(C=C1)N	1467926096	-1	8.75451
4919	C1CCC(CC1)C(CCN2CCCC2)(C3=CC=CC=C3)O	1467926115	-1	0
4932	CCCNCC(COC1=CC=CC=C1C(=O)CCC2=CC=CC=C2)O	1467926136	-1	6
4935	CCCOC1=C(C=C(C=C1)C(=O)OCCN(CC)CC)N	1467926146	-1	1.15098
4993	CCC1=C(C(=NC(=N1)N)N)C2=CC=C(C=C2)Cl	1467926177	1	30
4993	CCC1=C(C(=NC(=N1)N)N)C2=CC=C(C=C2)Cl	1467926177	-1	30
4993	CCC1=C(C(=NC(=N1)N)N)C2=CC=C(C=C2)Cl	1467926177	1	30
4993	CCC1=C(C(=NC(=N1)N)N)C2=CC=C(C=C2)Cl	1467926177	-1	30
53313247	CC1=C2[C@H](C(=O)[C@]3([C@H](C[C@@H]4[C@]([C@H]3[C@@H]([C@@](C2(C)C)(C[C@@H]1OC(=O)[C@@H]([C@H](C5=CC=CC=C5)NC(=O)C6=CC=CC=C6)O)O)OC(=O)C7=CC=CC=C7)(CO4)OC(=O)C)O)C)OC(=O)C	1467926198	1	56
53313247	CC1=C2[C@H](C(=O)[C@]3([C@H](C[C@@H]4[C@]([C@H]3[C@@H]([C@@](C2(C)C)(C[C@@H]1OC(=O)[C@@H]([C@H](C5=CC=CC=C5)NC(=O)C6=CC=CC=C6)O)O)OC(=O)C7=CC=CC=C7)(CO4)OC(=O)C)O)C)OC(=O)C	1467926198	-1	56
441276	CC1=C2[C@H](C(=O)[C@@]3([C@H](C[C@@H]4[C@](C3[C@@H]([C@@](C2(C)C)(C[C@@H]1OC(=O)[C@@H]([C@H](C5=CC=CC=C5)NC(=O)C6=CC=CC=C6)O)O)OC(=O)C7=CC=CC=C7)(CO4)OC(=O)C)O)C)OC(=O)C	1467926198	1	56
36314	CC1=C2[C@H](C(=O)[C@@]3([C@H](C[C@@H]4[C@]([C@H]3[C@@H]([C@@](C2(C)C)(C[C@@H]1OC(=O)[C@@H]([C@H](C5=CC=CC=C5)NC(=O)C6=CC=CC=C6)O)O)OC(=O)C7=CC=CC=C7)(CO4)OC(=O)C)O)C)OC(=O)C	1467926198	-1	56
53313247	CC1=C2[C@H](C(=O)[C@]3([C@H](C[C@@H]4[C@]([C@H]3[C@@H]([C@@](C2(C)C)(C[C@@H]1OC(=O)[C@@H]([C@H](C5=CC=CC=C5)NC(=O)C6=CC=CC=C6)O)O)OC(=O)C7=CC=CC=C7)(CO4)OC(=O)C)O)C)OC(=O)C	1467926198	1	56
53313247	CC1=C2[C@H](C(=O)[C@]3([C@H](C[C@@H]4[C@]([C@H]3[C@@H]([C@@](C2(C)C)(C[C@@H]1OC(=O)[C@@H]([C@H](C5=CC=CC=C5)NC(=O)C6=CC=CC=C6)O)O)OC(=O)C7=CC=CC=C7)(CO4)OC(=O)C)O)C)OC(=O)C	1467926198	-1	56
441276	CC1=C2[C@H](C(=O)[C@@]3([C@H](C[C@@H]4[C@](C3[C@@H]([C@@](C2(C)C)(C[C@@H]1OC(=O)[C@@H]([C@H](C5=CC=CC=C5)NC(=O)C6=CC=CC=C6)O)O)OC(=O)C7=CC=CC=C7)(CO4)OC(=O)C)O)C)OC(=O)C	1467926198	1	56
36314	CC1=C2[C@H](C(=O)[C@@]3([C@H](C[C@@H]4[C@]([C@H]3[C@@H]([C@@](C2(C)C)(C[C@@H]1OC(=O)[C@@H]([C@H](C5=CC=CC=C5)NC(=O)C6=CC=CC=C6)O)O)OC(=O)C7=CC=CC=C7)(CO4)OC(=O)C)O)C)OC(=O)C	1467926198	-1	56
53313247	CC1=C2[C@H](C(=O)[C@]3([C@H](C[C@@H]4[C@]([C@H]3[C@@H]([C@@](C2(C)C)(C[C@@H]1OC(=O)[C@@H]([C@H](C5=CC=CC=C5)NC(=O)C6=CC=CC=C6)O)O)OC(=O)C7=CC=CC=C7)(CO4)OC(=O)C)O)C)OC(=O)C	1467926198	1	56
53313247	CC1=C2[C@H](C(=O)[C@]3([C@H](C[C@@H]4[C@]([C@H]3[C@@H]([C@@](C2(C)C)(C[C@@H]1OC(=O)[C@@H]([C@H](C5=CC=CC=C5)NC(=O)C6=CC=CC=C6)O)O)OC(=O)C7=CC=CC=C7)(CO4)OC(=O)C)O)C)OC(=O)C	1467926198	-1	56
441276	CC1=C2[C@H](C(=O)[C@@]3([C@H](C[C@@H]4[C@](C3[C@@H]([C@@](C2(C)C)(C[C@@H]1OC(=O)[C@@H]([C@H](C5=CC=CC=C5)NC(=O)C6=CC=CC=C6)O)O)OC(=O)C7=CC=CC=C7)(CO4)OC(=O)C)O)C)OC(=O)C	1467926198	1	56
36314	CC1=C2[C@H](C(=O)[C@@]3([C@H](C[C@@H]4[C@]([C@H]3[C@@H]([C@@](C2(C)C)(C[C@@H]1OC(=O)[C@@H]([C@H](C5=CC=CC=C5)NC(=O)C6=CC=CC=C6)O)O)OC(=O)C7=CC=CC=C7)(CO4)OC(=O)C)O)C)OC(=O)C	1467926198	-1	56
53313247	CC1=C2[C@H](C(=O)[C@]3([C@H](C[C@@H]4[C@]([C@H]3[C@@H]([C@@](C2(C)C)(C[C@@H]1OC(=O)[C@@H]([C@H](C5=CC=CC=C5)NC(=O)C6=CC=CC=C6)O)O)OC(=O)C7=CC=CC=C7)(CO4)OC(=O)C)O)C)OC(=O)C	1467926198	1	56
53313247	CC1=C2[C@H](C(=O)[C@]3([C@H](C[C@@H]4[C@]([C@H]3[C@@H]([C@@](C2(C)C)(C[C@@H]1OC(=O)[C@@H]([C@H](C5=CC=CC=C5)NC(=O)C6=CC=CC=C6)O)O)OC(=O)C7=CC=CC=C7)(CO4)OC(=O)C)O)C)OC(=O)C	1467926198	-1	56
441276	CC1=C2[C@H](C(=O)[C@@]3([C@H](C[C@@H]4[C@](C3[C@@H]([C@@](C2(C)C)(C[C@@H]1OC(=O)[C@@H]([C@H](C5=CC=CC=C5)NC(=O)C6=CC=CC=C6)O)O)OC(=O)C7=CC=CC=C7)(CO4)OC(=O)C)O)C)OC(=O)C	1467926198	1	56
36314	CC1=C2[C@H](C(=O)[C@@]3([C@H](C[C@@H]4[C@]([C@H]3[C@@H]([C@@](C2(C)C)(C[C@@H]1OC(=O)[C@@H]([C@H](C5=CC=CC=C5)NC(=O)C6=CC=CC=C6)O)O)OC(=O)C7=CC=CC=C7)(CO4)OC(=O)C)O)C)OC(=O)C	1467926198	-1	56
54892	CCOC(=O)[C@H](CCC1=CC=CC=C1)N[C@@H](C)C(=O)N2CC3=CC=CC=C3C[C@H]2C(=O)O	1467926235	-1	7.89505
4913	CCN(CC)CCNC(=O)C1=CC=C(C=C1)N	1467926255	-1	9.78947
4917	CN1CCN(CC1)CCCN2C3=CC=CC=C3SC4=C2C=C(C=C4)Cl	1467926275	-1	16
4917	CN1CCN(CC1)CCCN2C3=CC=CC=C3SC4=C2C=C(C=C4)Cl	1467926275	1	16
4917	CN1CCN(CC1)CCCN2C3=CC=CC=C3SC4=C2C=C(C=C4)Cl	1467926275	-1	16
4917	CN1CCN(CC1)CCCN2C3=CC=CC=C3SC4=C2C=C(C=C4)Cl	1467926275	1	16
4940	CCC(=O)C1=CC2=C(C=C1)SC3=CC=CC=C3N2CC(C)N(C)C	1467926297	-1	11.4783
91536	CC(C)NC[C@@H](COC1=CC=CC2=CC=CC=C21)O	1467926317	-1	1
4946	CC(C)NCC(COC1=CC=CC2=CC=CC=C21)O	1467926317	-1	1
91536	CC(C)NC[C@@H](COC1=CC=CC2=CC=CC=C21)O	1467926317	-1	1
4946	CC(C)NCC(COC1=CC=CC2=CC=CC=C21)O	1467926317	-1	1
4976	CNCCCC1C2=CC=CC=C2C=CC3=CC=CC=C13	1467926327	-1	5.75385
4688	CN(CC#C)CC1=CC=CC=C1	1467926387	-1	2.07692
43815	C1CNC[C@H]([C@@H]1C2=CC=C(C=C2)F)COC3=CC4=C(C=C3)OCO4	1467926397	-1	10
4740	CC(=O)CCCCN1C(=O)C2=C(N=CN2C)N(C1=O)C	1467926482	-1	9.46377
47811	CCCN1C[C@@H](C[C@H]2[C@H]1CC3=CNC4=CC=CC2=C34)CSC	1467926493	-1	1.77012
4748	C1CN(CCN1CCCN2C3=CC=CC=C3SC4=C2C=C(C=C4)Cl)CCO	1467926503	-1	16
4748	C1CN(CCN1CCCN2C3=CC=CC=C3SC4=C2C=C(C=C4)Cl)CCO	1467926503	1	16
4748	C1CN(CCN1CCCN2C3=CC=CC=C3SC4=C2C=C(C=C4)Cl)CCO	1467926503	-1	16
4748	C1CN(CCN1CCCN2C3=CC=CC=C3SC4=C2C=C(C=C4)Cl)CCO	1467926503	1	16
4753	C1=CC=C(C=C1)CC(=O)NC(=O)N	1467926514	-1	3
4756	C1=CC=C(C=C1)N=NC2=C(N=C(C=C2)N)N	1467926524	-1	2.28974
3675	C1=CC=C(C=C1)CCNN	1467926535	-1	12
6839	CN1C(=O)CC(C1=O)C2=CC=CC=C2	1467926593	-1	4.35014
4781	CCCCC1C(=O)N(N(C1=O)C2=CC=CC=C2)C3=CC=CC=C3	1467926614	-1	11.6927
1775	C1=CC=C(C=C1)C2(C(=O)NC(=O)N2)C3=CC=CC=C3	1467926635	-1	8.57627
4828	CC(C)NCC(COC1=CC=CC2=C1C=CN2)O	1467926645	-1	0
4810	CC1=NC(=C(C(=N1)Cl)NC2=NCCN2)OC	1467926705	-1	3.08333
3038	C1=C(C=C(C(=C1S(=O)(=O)N)Cl)Cl)S(=O)(=O)N	1467926793	-1	6
2720	C1=C2C(=CC(=C1Cl)S(=O)(=O)N)S(=O)(=O)N=CN2	1467926817	-1	7.42857
5405	CC(C)(C)C1=CC=C(C=C1)C(CCCN2CCC(CC2)C(C3=CC=CC=C3)(C4=CC=CC=C4)O)O	1467926827	-1	5
5405	CC(C)(C)C1=CC=C(C=C1)C(CCCN2CCC(CC2)C(C3=CC=CC=C3)(C4=CC=CC=C4)O)O	1467926827	1	5
5405	CC(C)(C)C1=CC=C(C=C1)C(CCCN2CCC(CC2)C(C3=CC=CC=C3)(C4=CC=CC=C4)O)O	1467926827	-1	5
5405	CC(C)(C)C1=CC=C(C=C1)C(CCCN2CCC(CC2)C(C3=CC=CC=C3)(C4=CC=CC=C4)O)O	1467926827	1	5
3822	C1CN(CCC1C(=O)C2=CC=C(C=C2)F)CCN3C(=O)C4=CC=CC=C4NC3=O	1467926837	-1	7.04157
3749	CCCCC1=NC2(CCCC2)C(=O)N1CC3=CC=C(C=C3)C4=CC=CC=C4C5=NNN=N5	1467926890	-1	6
101616	CN1[C@@H](CCC[C@@H]1CC(=O)C2=CC=CC=C2)C[C@@H](C3=CC=CC=C3)O	1467926935	-1	1.22491
5429	CN1C=NC2=C1C(=O)NC(=O)N2C	1467926969	-1	1.71896
2519	CN1C=NC2=C1C(=O)N(C(=O)N2C)C	1467926983	-1	3.74297
4630	C1CCN(C1)CC#CCN2CCCC2=O	1467927018	-1	0.288783
34312	C1C2=CC=CC=C2N(C3=CC=CC=C3C1=O)C(=O)N	1467927095	-1	16
3331	C1=CC=C(C=C1)C(COC(=O)N)COC(=O)N	1467927192	-1	6
3291	CCC1(CC(=O)NC1=O)C	1467927234	-1	4.60563
4848	CN1CCN(CC1)CC(=O)N2C3=CC=CC=C3C(=O)NC4=C2N=CC=C4	1467927254	-1	4.98461
36339	CCOC(=O)C1=CN=CN1C(C)C2=CC=CC=C2	1467927398	-1	1
4943	CC(C)C1=C(C(=CC=C1)C(C)C)O	1467927409	-1	2
5411	CCCCNC1=CC=C(C=C1)C(=O)OCCN(C)C	1467927442	-1	6.29252
2337	CCOC(=O)C1=CC=C(C=C1)N	1467927454	-1	13.1775
4062	CC1=C(C(=CC=C1)C)NC(=O)C2CCCCN2C	1467927465	-1	7.27044
2474	CCCCN1CCCCC1C(=O)NC2=C(C=CC=C2C)C	1467927475	-1	7.09202
4906	CCCNC(C)C(=O)NC1=CC=CC=C1C	1467927496	-1	6.05465
5991	C[C@]12CC[C@H]3[C@H]([C@@H]1CC[C@]2(C#C)O)CCC4=C3C=CC(=C4)O	1467927526	-1	4
24707	C[C@]12CCC3C(C1CC[C@]2(C#C)O)CCC4=C3C=CC(=C4)O	1467927526	-1	4
5991	C[C@]12CC[C@H]3[C@H]([C@@H]1CC[C@]2(C#C)O)CCC4=C3C=CC(=C4)O	1467927526	-1	4
24707	C[C@]12CCC3C(C1CC[C@]2(C#C)O)CCC4=C3C=CC(=C4)O	1467927526	-1	4
2336	C1=CC=C2C3=C4C(=CC2=C1)C=CC5=C4C(=CC=C5)C=C3	1467927542	-1	54
6009	CC1=C(C(=O)N(N1C)C2=CC=CC=C2)N(C)C	1467927584	-1	0.531862
3250	CC(CO)NC(=O)C1CN(C2CC3=CNC4=CC=CC(=C34)C2=C1)C	1467927628	-1	1.75655
6710625	C[C@@H](CO)NC(=O)C1CN([C@@H]2CC3=CNC4=CC=CC(=C34)C2=C1)C	1467927628	-1	1.75655
3250	CC(CO)NC(=O)C1CN(C2CC3=CNC4=CC=CC(=C34)C2=C1)C	1467927628	-1	1.75655
6710625	C[C@@H](CO)NC(=O)C1CN([C@@H]2CC3=CNC4=CC=CC(=C34)C2=C1)C	1467927628	-1	1.75655
134551	CC(C)C[C@H]1C(=O)N2CCC[C@H]2[C@]3(N1C(=O)[C@](O3)(C(C)C)NC(=O)[C@H]4CN([C@@H]5CC6=CNC7=CC=CC(=C67)C5=C4)C)O	1467927654	-1	14
5095	CCCN(CCC)CCC1=C2CC(=O)NC2=CC=C1	1467927834	-1	8.47004
16362	C1CN(CCC1N2C3=CC=CC=C3NC2=O)CCCC(C4=CC=C(C=C4)F)C5=CC=C(C=C5)F	1467927856	-1	12
16362	C1CN(CCC1N2C3=CC=CC=C3NC2=O)CCCC(C4=CC=C(C=C4)F)C5=CC=C(C=C5)F	1467927856	1	12
16362	C1CN(CCC1N2C3=CC=CC=C3NC2=O)CCCC(C4=CC=C(C=C4)F)C5=CC=C(C=C5)F	1467927856	-1	12
16362	C1CN(CCC1N2C3=CC=CC=C3NC2=O)CCCC(C4=CC=C(C=C4)F)C5=CC=C(C=C5)F	1467927856	1	12
657298	CCCC1=CC(=O)NC(=S)N1	1467927886	-1	1
4205	CN1CCN2C(C1)C3=CC=CC=C3CC4=C2N=CC=C4	1467927897	-1	2.70204
5324346	COCCCC/C(=N\OCCN)/C1=CC=C(C=C1)C(F)(F)F	1467927907	-1	56
2771	CN(C)CCCC1(C2=C(CO1)C=C(C=C2)C#N)C3=CC=C(C=C3)F	1467927918	-1	7.58824
146570	CN(C)CCC[C@@]1(C2=C(CO1)C=C(C=C2)C#N)C3=CC=C(C=C3)F	1467927918	-1	7.58824
2771	CN(C)CCCC1(C2=C(CO1)C=C(C=C2)C#N)C3=CC=C(C=C3)F	1467927918	-1	7.58824
146570	CN(C)CCC[C@@]1(C2=C(CO1)C=C(C=C2)C#N)C3=CC=C(C=C3)F	1467927918	-1	7.58824
71602	CC(=O)NNC(=O)C1=CC=NC=C1	1467928044	-1	12.1138
3339	CC(C)OC(=O)C(C)(C)OC1=CC=C(C=C1)C(=O)C2=CC=C(C=C2)Cl	1467928055	-1	18
5090	CS(=O)(=O)C1=CC=C(C=C1)C2=C(C(=O)OC2)C3=CC=CC=C3	1467928097	-1	13
4754	CCOC1=CC=C(C=C1)NC(=O)C	1467928107	-1	7.85065
6167	CC(=O)N[C@H]1CCC2=CC(=C(C(=C2C3=CC=C(C(=O)C=C13)OC)OC)OC)OC	1467928119	1	8
5281051	CC1=CC(=C2C3=C1C4=C5C(=C(C=C4C)O)C(=O)C6=C(C=C(C7=C6C5=C3C8=C7C(=CC(=C8C2=O)O)O)O)O)O	1467928280	-1	9.37314
5420804	C/C/1=C/CC[C@@]2([C@H](O2)[C@@H]3[C@@H](CC1)C(=C)C(=O)O3)C	1467928317	-1	45.296
24870789	C/C/1=C/CC[C@@]2(C(O2)[C@@H]3[C@@H](CC1)C(=C)C(=O)O3)C	1467928317	-1	45.296
5420804	C/C/1=C/CC[C@@]2([C@H](O2)[C@@H]3[C@@H](CC1)C(=C)C(=O)O3)C	1467928317	-1	45.296
24870789	C/C/1=C/CC[C@@]2(C(O2)[C@@H]3[C@@H](CC1)C(=C)C(=O)O3)C	1467928317	-1	45.296
5213	COC1=C(C=CC(=C1)C2C(OC3=C(O2)C=C(C=C3)C4C(C(=O)C5=C(C=C(C=C5O4)O)O)O)CO)O	1467928330	-1	11.4216
31553	COC1=C(C=CC(=C1)[C@@H]2[C@H](OC3=C(O2)C=C(C=C3)[C@@H]4[C@H](C(=O)C5=C(C=C(C=C5O4)O)O)O)CO)O	1467928330	-1	11.4216
5213	COC1=C(C=CC(=C1)C2C(OC3=C(O2)C=C(C=C3)C4C(C(=O)C5=C(C=C(C=C5O4)O)O)O)CO)O	1467928330	-1	11.4216
31553	COC1=C(C=CC(=C1)[C@@H]2[C@H](OC3=C(O2)C=C(C=C3)[C@@H]4[C@H](C(=O)C5=C(C=C(C=C5O4)O)O)O)CO)O	1467928330	-1	11.4216
31072	CCOC(=O)N1C=CN(C1=S)C	1467928365	-1	0.462366
2145	CCC1(CCC(=O)NC1=O)C2=CC=C(C=C2)N	1467928385	-1	14.6983
6291	C[C@]12CC[C@H]3[C@H]([C@@H]1CC[C@]2(C#C)O)CCC4=C3C=CC(=C4)OC	1467928395	-1	4
17134	COC1=C(N=CN=C1OC)NS(=O)(=O)C2=CC=C(C=C2)N	1467928518	-1	2.70552
6178111	CC(C)N=C(N)/N=C(\N)/NC1=CC=C(C=C1)Cl	1467928528	-1	8.76215
4046	C1CCNC(C1)C(C2=CC(=NC3=C2C=CC=C3C(F)(F)F)C(F)(F)F)O	1467928552	-1	21.8732
3728	C1=CC2=C(C(=C(C=C2I)I)O)N=C1	1467928586	-1	21.0153
3728	C1=CC2=C(C(=C(C=C2I)I)O)N=C1	1467928586	1	21.0153
3728	C1=CC2=C(C(=C(C=C2I)I)O)N=C1	1467928586	-1	21.0153
3728	C1=CC2=C(C(=C(C=C2I)I)O)N=C1	1467928586	1	21.0153
19529	CN(C1=CC=C(C=C1)OC(=O)C2=CC=CO2)C(=O)C(Cl)Cl	1467928596	-1	22.1805
55245	CC#C[C@@]1(CC[C@@H]2[C@@]1(C[C@@H](C3=C4CCC(=O)C=C4CC[C@@H]23)C5=CC=C(C=C5)N(C)C)C)O	1467928759	-1	40
3397	CC(C)C(=O)NC1=CC(=C(C=C1)[N+](=O)[O-])C(F)(F)F	1467928771	-1	58
5215	C1=CN=C(N=C1)NS(=O)(=O)C2=CC=C(C=C2)N	1467928823	-1	19.8939
4806	C1=CC=C(C(=C1)C(=O)NC2=CC=C(C=C2)S(=O)(=O)NC3=NC=CS3)C(=O)O	1467928833	-1	14.8434
5379	CC1CN(CCN1)C2=C(C=C3C(=C2OC)N(C=C(C3=O)C(=O)O)C4CC4)F	1467928857	-1	10.4741
2761171	CCC1=NC=CC(=C1)C(=S)N	1467928900	-1	9.39535
2955	C1=CC(=CC=C1N)S(=O)(=O)C2=CC=C(C=C2)N	1467928910	-1	21.0438
3503	CC1=C(C(=C2C(=C1)C(=C(C(=C2C=O)O)O)C(C)C)O)C3=C(C=C4C(=C3O)C(=C(C(=C4C(C)C)O)O)C=O)C	1467928921	-1	71.7965
3476	CCC1=C(CN(C1=O)C(=O)NCCC2=CC=C(C=C2)S(=O)(=O)NC(=O)NC3CCC(CC3)C)C	1467928944	-1	14.6757
65981	CCOC1=C(C=CC(=C1)CC(=O)N[C@@H](CC(C)C)C2=CC=CC=C2N3CCCCC3)C(=O)O	1467928955	-1	5.64179
8249	C1=CC=C(C=C1)CCN=C(N)N=C(N)N	1467928986	-1	1.2437
4829	CCC1=CN=C(C=C1)CCOC2=CC=C(C=C2)CC3C(=O)NC(=O)S3	1467929008	-1	17
3341	C1CNCC(C2=CC(=C(C(=C21)Cl)O)O)C3=CC=C(C=C3)O	1467929028	-1	23.8723
107807	CCC[C@@H](C(=O)OCC)N[C@@H](C)C(=O)N1[C@H]2CCCC[C@H]2C[C@H]1C(=O)O	1467929077	-1	5.63898
2540	CCOC1=NC2=CC=CC(=C2N1CC3=CC=C(C=C3)C4=CC=CC=C4C5=NNN=N5)C(=O)OC(C)OC(=O)OC6CCCCC6	1467929108	-1	10.9353
65999	CCCC1=NC2=C(C=C(C=C2N1CC3=CC=C(C=C3)C4=CC=CC=C4C(=O)O)C5=NC6=CC=CC=C6N5C)C	1467929118	-1	3.62276
12895035	C[C@H](CC[C@H](C(C)(C)O)O)[C@H]1CC[C@@H]\2[C@@]1(CCC/C2=C\C=C\3/C[C@H](CCC3=C)O)C	1467929143	-1	9.95327
4507	CCOC(=O)C1=C(NC(=C(C1C2=CC(=CC=C2)[N+](=O)[O-])C(=O)OC)C)C	1467929157	-1	52.3385
2315	C1=CC=C(C=C1)CC2NC3=C(C=C(C(=C3)C(F)(F)F)S(=O)(=O)N)S(=O)(=O)N2	1467929470	-1	17.4643
2343	C1=CC=C(C=C1)CSCC2=NS(=O)(=O)C3=CC(=C(C=C3N2)Cl)S(=O)(=O)N	1467929480	-1	7.42857
68844	CCN[C@H]1CN(S(=O)(=O)C2=C1C=C(S2)S(=O)(=O)N)CCCOC	1467929490	-1	0
6024	CC(=O)OCC1=C(N2[C@@H]([C@@H](C2=O)NC(=O)CC3=CC=CS3)SC1)C(=O)O	1467929501	-1	17.5324
3647	C1NC2=C(C=C(C(=C2)C(F)(F)F)S(=O)(=O)N)S(=O)(=O)N1	1467929513	-1	19.3333
4100	CC(=O)N=C1N(N=C(S1)S(=O)(=O)N)C	1467929524	-1	0
2678	C1CN(CCN1CCOCC(=O)O)C(C2=CC=CC=C2)C3=CC=C(C=C3)Cl	1467929625	-1	6
3354	CC1=C(OC2=C(C1=O)C=CC=C2C(=O)OCCN3CCCCC3)C4=CC=CC=C4	1467929733	-1	2
21700	CCC(=O)OCC(=O)[C@]1([C@H](C[C@@H]2[C@@]1(C[C@@H]([C@]3([C@H]2CCC4=CC(=O)C=C[C@@]43C)Cl)O)C)C)OC(=O)CC	1467929753	-1	47.1564
5282593	CN1[C@@H]2CC[C@H]1CC(C2)OC(=O)C(C3=CC=CC=C3)O	1467929764	-1	5.8
5702065	CN1[C@H]2CCC1CC(C2)OC(=O)C(C3=CC=CC=C3)O	1467929764	-1	5.8
5282593	CN1[C@@H]2CC[C@H]1CC(C2)OC(=O)C(C3=CC=CC=C3)O	1467929764	-1	5.8
5702065	CN1[C@H]2CCC1CC(C2)OC(=O)C(C3=CC=CC=C3)O	1467929764	-1	5.8
441336	C[C@@H]1C[C@H]2[C@@H]3CCC4=CC(=O)C=C[C@@]4([C@]3([C@H](C[C@@]2([C@]1(C(=O)CCl)OC(=O)C5=CC=CO5)C)O)Cl)C	1467929794	-1	47.1564
4057	C[N+]1(CCCC(C1)OC(=O)C(C2=CC=CC=C2)(C3=CC=CC=C3)O)C	1467929804	-1	18.0765
3182	CN1C2=C(C(=O)N(C1=O)C)N(C=N2)CC(CO)O	1467929814	-1	3.5625
3373	CCOC(=O)C1=C2CN(C(=O)C3=C(N2C=N1)C=CC(=C3)F)C	1467929826	-1	5.46939
3032285	CCCC(C)C1(C(=O)NC(=S)NC1=O)CC=C	1467929977	-1	9.41771
4097	CC[N+](C)(CC)CCOC(=O)C1C2=CC=CC=C2OC3=CC=CC=C13	1467929988	-1	12.6744
4168	CCN(CC)CCNC(=O)C1=CC(=C(C=C1OC)N)Cl	1467930078	-1	6.49677
2482	CCCCOC(=O)C1=CC=C(C=C1)N	1467930129	-1	13.1775
3025	CCCCOC1=NC2=CC=CC=C2C(=C1)C(=O)NCCN(CC)CC	1467930160	-1	3.78947
3180	CCCCOC1=CC=C(C=C1)C(=O)CCN2CCCCC2	1467930187	-1	0
2435	C1CN=C(N1)NC2=C(C3=NC=CN=C3C=C2)Br	1467930207	-1	3.59282
4195	COC1=CC(=C(C=C1)OC)C(CNC(=O)CN)O	1467930247	-1	5
4886	CCCCOC1=CC=C(C=C1)OCCCN2CCOCC2	1467930257	-1	3.49816
6843	CCCOC1=C(C=CC(=C1)N)C(=O)OCCN(CC)CC	1467930278	-1	10.9333
3899	CC1=C(C=NO1)C(=O)NC2=CC=C(C=C2)C(F)(F)F	1467930332	-1	30
478951	C[C@@H]1CC[C@H]2C[C@@H](C(=CC=CC=C[C@H](C[C@H](C(=O)[C@@H]([C@@H](C(=C[C@H](C(=O)C[C@H](OC(=O)[C@@H]3CCCCN3C(=O)C(=O)[C@@]1(O2)O)[C@H](C)C[C@@H]4CC[C@H]([C@@H](C4)OC)O)C)C)O)OC)C)C)C)OC	1467930362	-1	74
478951	C[C@@H]1CC[C@H]2C[C@@H](C(=CC=CC=C[C@H](C[C@H](C(=O)[C@@H]([C@@H](C(=C[C@H](C(=O)C[C@H](OC(=O)[C@@H]3CCCCN3C(=O)C(=O)[C@@]1(O2)O)[C@H](C)C[C@@H]4CC[C@H]([C@@H](C4)OC)O)C)C)O)OC)C)C)C)OC	1467930362	1	74
44634703	C[C@@H]1CC[C@H]2C[C@@H](/C(=C\C=C\C=C\[C@H](C[C@H](C(=O)[C@@H]([C@@H](/C(=C/[C@H](C(=O)C[C@H](OC(=O)[C@@H]3CCCCN3C(=O)C(=O)[C@@]1(O2)O)C(C)CC4CC[C@H]([C@@H](C4)OC)O)C)/C)O)OC)C)C)/C)OC	1467930362	-1	74
44634693	C[C@@H]1CC[C@H]2C[C@@H](/C(=C\C=C\C=C\[C@H](C[C@H](C(=O)[C@@H]([C@@H](/C(=C/[C@H](C(=O)C[C@H](OC(=O)[C@@H]3CCCCN3C(=O)C(=O)[C@@]1(O2)O)[C@H](C)C[C@@H]4CC[C@H]([C@@H](C4)OC)O)C)/C)O)OC)C)C)/C)OC	1467930362	-1	74
478951	C[C@@H]1CC[C@H]2C[C@@H](C(=CC=CC=C[C@H](C[C@H](C(=O)[C@@H]([C@@H](C(=C[C@H](C(=O)C[C@H](OC(=O)[C@@H]3CCCCN3C(=O)C(=O)[C@@]1(O2)O)[C@H](C)C[C@@H]4CC[C@H]([C@@H](C4)OC)O)C)C)O)OC)C)C)C)OC	1467930362	-1	74
478951	C[C@@H]1CC[C@H]2C[C@@H](C(=CC=CC=C[C@H](C[C@H](C(=O)[C@@H]([C@@H](C(=C[C@H](C(=O)C[C@H](OC(=O)[C@@H]3CCCCN3C(=O)C(=O)[C@@]1(O2)O)[C@H](C)C[C@@H]4CC[C@H]([C@@H](C4)OC)O)C)C)O)OC)C)C)C)OC	1467930362	1	74
44634703	C[C@@H]1CC[C@H]2C[C@@H](/C(=C\C=C\C=C\[C@H](C[C@H](C(=O)[C@@H]([C@@H](/C(=C/[C@H](C(=O)C[C@H](OC(=O)[C@@H]3CCCCN3C(=O)C(=O)[C@@]1(O2)O)C(C)CC4CC[C@H]([C@@H](C4)OC)O)C)/C)O)OC)C)C)/C)OC	1467930362	-1	74
44634693	C[C@@H]1CC[C@H]2C[C@@H](/C(=C\C=C\C=C\[C@H](C[C@H](C(=O)[C@@H]([C@@H](/C(=C/[C@H](C(=O)C[C@H](OC(=O)[C@@H]3CCCCN3C(=O)C(=O)[C@@]1(O2)O)[C@H](C)C[C@@H]4CC[C@H]([C@@H](C4)OC)O)C)/C)O)OC)C)C)/C)OC	1467930362	-1	74
478951	C[C@@H]1CC[C@H]2C[C@@H](C(=CC=CC=C[C@H](C[C@H](C(=O)[C@@H]([C@@H](C(=C[C@H](C(=O)C[C@H](OC(=O)[C@@H]3CCCCN3C(=O)C(=O)[C@@]1(O2)O)[C@H](C)C[C@@H]4CC[C@H]([C@@H](C4)OC)O)C)C)O)OC)C)C)C)OC	1467930362	-1	74
478951	C[C@@H]1CC[C@H]2C[C@@H](C(=CC=CC=C[C@H](C[C@H](C(=O)[C@@H]([C@@H](C(=C[C@H](C(=O)C[C@H](OC(=O)[C@@H]3CCCCN3C(=O)C(=O)[C@@]1(O2)O)[C@H](C)C[C@@H]4CC[C@H]([C@@H](C4)OC)O)C)C)O)OC)C)C)C)OC	1467930362	1	74
44634703	C[C@@H]1CC[C@H]2C[C@@H](/C(=C\C=C\C=C\[C@H](C[C@H](C(=O)[C@@H]([C@@H](/C(=C/[C@H](C(=O)C[C@H](OC(=O)[C@@H]3CCCCN3C(=O)C(=O)[C@@]1(O2)O)C(C)CC4CC[C@H]([C@@H](C4)OC)O)C)/C)O)OC)C)C)/C)OC	1467930362	-1	74
44634693	C[C@@H]1CC[C@H]2C[C@@H](/C(=C\C=C\C=C\[C@H](C[C@H](C(=O)[C@@H]([C@@H](/C(=C/[C@H](C(=O)C[C@H](OC(=O)[C@@H]3CCCCN3C(=O)C(=O)[C@@]1(O2)O)[C@H](C)C[C@@H]4CC[C@H]([C@@H](C4)OC)O)C)/C)O)OC)C)C)/C)OC	1467930362	-1	74
478951	C[C@@H]1CC[C@H]2C[C@@H](C(=CC=CC=C[C@H](C[C@H](C(=O)[C@@H]([C@@H](C(=C[C@H](C(=O)C[C@H](OC(=O)[C@@H]3CCCCN3C(=O)C(=O)[C@@]1(O2)O)[C@H](C)C[C@@H]4CC[C@H]([C@@H](C4)OC)O)C)C)O)OC)C)C)C)OC	1467930362	-1	74
478951	C[C@@H]1CC[C@H]2C[C@@H](C(=CC=CC=C[C@H](C[C@H](C(=O)[C@@H]([C@@H](C(=C[C@H](C(=O)C[C@H](OC(=O)[C@@H]3CCCCN3C(=O)C(=O)[C@@]1(O2)O)[C@H](C)C[C@@H]4CC[C@H]([C@@H](C4)OC)O)C)C)O)OC)C)C)C)OC	1467930362	1	74
44634703	C[C@@H]1CC[C@H]2C[C@@H](/C(=C\C=C\C=C\[C@H](C[C@H](C(=O)[C@@H]([C@@H](/C(=C/[C@H](C(=O)C[C@H](OC(=O)[C@@H]3CCCCN3C(=O)C(=O)[C@@]1(O2)O)C(C)CC4CC[C@H]([C@@H](C4)OC)O)C)/C)O)OC)C)C)/C)OC	1467930362	-1	74
44634693	C[C@@H]1CC[C@H]2C[C@@H](/C(=C\C=C\C=C\[C@H](C[C@H](C(=O)[C@@H]([C@@H](/C(=C/[C@H](C(=O)C[C@H](OC(=O)[C@@H]3CCCCN3C(=O)C(=O)[C@@]1(O2)O)[C@H](C)C[C@@H]4CC[C@H]([C@@H](C4)OC)O)C)/C)O)OC)C)C)/C)OC	1467930362	-1	74
5419	C1CC(C2=CC=CC=C2C1)C3=NCCN3	1467930400	-1	0
2576	CCCC(C)(COC(=O)N)COC(=O)NC(C)C	1467930465	-1	7.96094
2724	C1=CC(=CC=C1OCC(COC(=O)N)O)Cl	1467930485	-1	4.725
2733	C1=CC2=C(C=C1Cl)NC(=O)O2	1467930495	-1	6.33016
15459	CC1=CC(=CC(=C1)OCC2CNC(=O)O2)C	1467930516	-1	3
5070	C1=CC2=C(C=C1OC(F)(F)F)SC(=N2)N	1467930536	-1	24.0556
5311030	C1CCN(CC1)CCC(C2C[C@H]3C[C@@H]2C=C3)(C4=CC=CC=C4)O	1467930556	-1	1
667466	CN(C)CC/C=C/1\C2=CC=CC=C2SC3=C1C=C(C=C3)Cl	1467930605	-1	8.6338
2406	C1=C(C=C(C(=C1Cl)O)SC2=CC(=CC(=C2O)Cl)Cl)Cl	1467930669	-1	11.2965
2406	C1=C(C=C(C(=C1Cl)O)SC2=CC(=CC(=C2O)Cl)Cl)Cl	1467930669	1	11.2965
2406	C1=C(C=C(C(=C1Cl)O)SC2=CC(=CC(=C2O)Cl)Cl)Cl	1467930669	-1	11.2965
2406	C1=C(C=C(C(=C1Cl)O)SC2=CC(=CC(=C2O)Cl)Cl)Cl	1467930669	1	11.2965
3052	CCN(CC)C(=O)N1CCN(CC1)C	1467930680	-1	0
5853	COP(=O)(C(C(Cl)(Cl)Cl)O)OC	1467930691	-1	2.94708
5323714	C1COC(=O)N1/N=C/C2=CC=C(O2)[N+](=O)[O-]	1467930767	-1	26.7907
6842999	CC1CS(=O)(=O)CCN1/N=C/C2=CC=C(O2)[N+](=O)[O-]	1467930787	-1	23.4866
5284594	C=C1CC[C@]2([C@H]3CC4=C5[C@]2([C@H]1OC5=C(C=C4)O)CCN3CC6CC6)O	1467930909	-1	4.6481
3598	C1=C(C(=C(C(=C1Cl)Cl)CC2=C(C(=CC(=C2Cl)Cl)Cl)O)O)Cl	1467930990	-1	20.566
5447130	C1=C(OC(=C1)[N+](=O)[O-])/C=N/NC(=O)N	1467931013	-1	29.6139
5328	CC1=NN=C(S1)NS(=O)(=O)C2=CC=C(C=C2)N	1467931046	-1	21.8947
2762	CCN1C2=CC3=C(C=C2C(=O)C(=N1)C(=O)O)OCO3	1467931066	-1	1.06879
47472	C1=CC(=C(C(=C1)Cl)SC(CCC2=CC=C(C=C2)Cl)CN3C=CN=C3)Cl	1467931185	-1	4.04512
3198	C1=CC(=CC=C1COC(CN2C=CN=C2)C3=C(C=C(C=C3)Cl)Cl)Cl	1467931215	-1	10.4413
47641	CN(C/C=C/C1=CC=CC=C1)CC2=CC=CC3=CC=CC=C32	1467931245	-1	2.77789
9939594	C[C@@H]1[C@H]([C@@H]([C@@H]([C@@H](O1)OC\2CC3C(C(CC(O3)(CC(CC4C(O4)/C=C/C(=O)OC(C/C=C/C=C/C=C/C=C2)C)O)O)O)C(=O)O)O)N)O	1467931265	-1	15.6818
5353853	C1=CC(=C(C=C1Cl)Cl)CO/N=C(\CN2C=CN=C2)/C3=C(C=C(C=C3)Cl)Cl	1467931277	-1	6.24493
5318	C1=CC(=CC=C1CSC(CN2C=CN=C2)C3=C(C=C(C=C3)Cl)Cl)Cl	1467931297	-1	5.35401
667476	C/C=C(/C(=C/C)/C1=CC=C(C=C1)O)\C2=CC=C(C=C2)O	1467931380	-1	9.11111
667476	C/C=C(/C(=C/C)/C1=CC=C(C=C1)O)\C2=CC=C(C=C2)O	1467931380	1	9.11111
667476	C/C=C(/C(=C/C)/C1=CC=C(C=C1)O)\C2=CC=C(C=C2)O	1467931380	-1	9.11111
667476	C/C=C(/C(=C/C)/C1=CC=C(C=C1)O)\C2=CC=C(C=C2)O	1467931380	1	9.11111
65028	CCC(CC)O[C@@H]1C=C(C[C@@H]([C@H]1NC(=O)C)N)C(=O)OCC	1467931402	-1	15.6474
6869	CC1([C@@H](N2[C@H](S1)[C@@H](C2=O)NC(=O)COC3=CC=CC=C3)C(=O)O)C	1467931678	-1	15.9062
169870	CCCCCC(=O)O[C@@]1(CC[C@@H]2[C@@]1(CC[C@H]3[C@H]2CCC4=CC(=O)CC[C@]34C)C)C(=O)C	1467931788	-1	44
169870	CCCCCC(=O)O[C@@]1(CC[C@@H]2[C@@]1(CC[C@H]3[C@H]2CCC4=CC(=O)CC[C@]34C)C)C(=O)C	1467931788	1	44
5702072	CCCCCC(=O)O[C@@]1(CCC2[C@@]1(CCC3C2CCC4=CC(=O)CC[C@]34C)C)C(=O)C	1467931788	-1	44
169870	CCCCCC(=O)O[C@@]1(CC[C@@H]2[C@@]1(CC[C@H]3[C@H]2CCC4=CC(=O)CC[C@]34C)C)C(=O)C	1467931788	-1	44
169870	CCCCCC(=O)O[C@@]1(CC[C@@H]2[C@@]1(CC[C@H]3[C@H]2CCC4=CC(=O)CC[C@]34C)C)C(=O)C	1467931788	1	44
5702072	CCCCCC(=O)O[C@@]1(CCC2[C@@]1(CCC3C2CCC4=CC(=O)CC[C@]34C)C)C(=O)C	1467931788	-1	44
169870	CCCCCC(=O)O[C@@]1(CC[C@@H]2[C@@]1(CC[C@H]3[C@H]2CCC4=CC(=O)CC[C@]34C)C)C(=O)C	1467931788	-1	44
169870	CCCCCC(=O)O[C@@]1(CC[C@@H]2[C@@]1(CC[C@H]3[C@H]2CCC4=CC(=O)CC[C@]34C)C)C(=O)C	1467931788	1	44
5702072	CCCCCC(=O)O[C@@]1(CCC2[C@@]1(CCC3C2CCC4=CC(=O)CC[C@]34C)C)C(=O)C	1467931788	-1	44
13109	CC[C@]12CC[C@H]3[C@H]([C@@H]1CC[C@]2(C#C)O)CCC4=CC(=O)CC[C@H]34	1467931800	-1	28
6279	C[C@H]1C[C@@H]2[C@H](CC[C@]3([C@H]2CC[C@@]3(C(=O)C)OC(=O)C)C)[C@@]4(C1=CC(=O)CC4)C	1467931814	-1	35.4278
5702080	C[C@H]1CC2C(CC[C@]3(C2CC[C@@]3(C(=O)C)OC(=O)C)C)[C@@]4(C1=CC(=O)CC4)C	1467931814	-1	35.4278
6279	C[C@H]1C[C@@H]2[C@H](CC[C@]3([C@H]2CC[C@@]3(C(=O)C)OC(=O)C)C)[C@@]4(C1=CC(=O)CC4)C	1467931814	-1	35.4278
5702080	C[C@H]1CC2C(CC[C@]3(C2CC[C@@]3(C(=O)C)OC(=O)C)C)[C@@]4(C1=CC(=O)CC4)C	1467931814	-1	35.4278
11683	CC1=C[C@@H]2[C@H](CC[C@]3([C@H]2CC[C@@]3(C(=O)C)OC(=O)C)C)[C@@]4(C1=CC(=O)CC4)C	1467931826	-1	36.5728
6710729	CC1=CC2C3CC[C@@](C3(CCC2C4(C1=CC(=O)CC4)C)C)(C(=O)C)OC(=O)C	1467931826	-1	36.5728
11683	CC1=C[C@@H]2[C@H](CC[C@]3([C@H]2CC[C@@]3(C(=O)C)OC(=O)C)C)[C@@]4(C1=CC(=O)CC4)C	1467931826	-1	36.5728
6710729	CC1=CC2C3CC[C@@](C3(CCC2C4(C1=CC(=O)CC4)C)C)(C(=O)C)OC(=O)C	1467931826	-1	36.5728
5995	CCC(=O)O[C@H]1CC[C@@H]2[C@@]1(CC[C@H]3[C@H]2CCC4=CC(=O)CC[C@]34C)C	1467931911	-1	27
5701990	CCC(=O)O[C@H]1CCC2[C@@]1(CCC3C2CCC4=CC(=O)CC[C@]34C)C	1467931911	-1	27
5995	CCC(=O)O[C@H]1CC[C@@H]2[C@@]1(CC[C@H]3[C@H]2CCC4=CC(=O)CC[C@]34C)C	1467931911	-1	27
5701990	CCC(=O)O[C@H]1CCC2[C@@]1(CCC3C2CCC4=CC(=O)CC[C@]34C)C	1467931911	-1	27
3902	C1=CC(=CC=C1C#N)C(C2=CC=C(C=C2)C#N)N3C=NC=N3	1467931965	-1	0
4493	CC1(C(=O)N(C(=O)N1)C2=CC(=C(C=C2)[N+](=O)[O-])C(F)(F)F)C	1467931975	-1	62
54677470	CC1=CN=C(S1)NC(=O)C2=C(C3=CC=CC=C3S(=O)(=O)N2C)O	1467931996	-1	16.5386
5745	CC(=O)OCC(=O)[C@]1(CC[C@@H]2[C@@]1(CC(=O)[C@H]3[C@H]2CCC4=CC(=O)CC[C@]34C)C)O	1467932018	-1	51
236702	C[C@@H]1C[C@H]2[C@@H]3CCC4=CC(=O)C=C[C@@]4([C@]3([C@H](C[C@@]2([C@]1(C(=O)COC(=O)C)O)C)O)F)C	1467932031	-1	63
5702036	C[C@@H]1CC2C3CCC4=CC(=O)C=C[C@@]4([C@]3([C@H](C[C@@]2([C@]1(C(=O)COC(=O)C)O)C)O)F)C	1467932031	-1	63
236702	C[C@@H]1C[C@H]2[C@@H]3CCC4=CC(=O)C=C[C@@]4([C@]3([C@H](C[C@@]2([C@]1(C(=O)COC(=O)C)O)C)O)F)C	1467932031	-1	63
5702036	C[C@@H]1CC2C3CCC4=CC(=O)C=C[C@@]4([C@]3([C@H](C[C@@]2([C@]1(C(=O)COC(=O)C)O)C)O)F)C	1467932031	-1	63
6708799	C[C@H]1CC2C3CC[C@@](C3(C[C@@H](C2C4(C1=CC(=O)C=C4)C)O)C)(C(=O)COC(=O)C)O	1467932071	-1	48.5782
5834	CC(=O)OCC(=O)[C@]1(CC[C@@H]2[C@@]1(C[C@@H]([C@H]3[C@H]2CCC4=CC(=O)C=C[C@]34C)O)C)O	1467932084	-1	50
5702107	CC(=O)OCC(=O)[C@]1(CCC2[C@@]1(C[C@@H](C3C2CCC4=CC(=O)C=CC34C)O)C)O	1467932084	-1	50
5834	CC(=O)OCC(=O)[C@]1(CC[C@@H]2[C@@]1(C[C@@H]([C@H]3[C@H]2CCC4=CC(=O)C=C[C@]34C)O)C)O	1467932084	-1	50
5702107	CC(=O)OCC(=O)[C@]1(CCC2[C@@]1(C[C@@H](C3C2CCC4=CC(=O)C=CC34C)O)C)O	1467932084	-1	50
6436	C[C@]12C[C@@H]([C@]3([C@H]([C@@H]1C[C@@H]4[C@]2(OC(O4)(C)C)C(=O)CO)CCC5=CC(=O)C=C[C@@]53C)F)O	1467932107	-1	60
5702126	C[C@]12C[C@@H]([C@]3(C(C1C[C@@H]4[C@]2(OC(O4)(C)C)C(=O)CO)CCC5=CC(=O)C=C[C@@]53C)F)O	1467932107	-1	60
6436	C[C@]12C[C@@H]([C@]3([C@H]([C@@H]1C[C@@H]4[C@]2(OC(O4)(C)C)C(=O)CO)CCC5=CC(=O)C=C[C@@]53C)F)O	1467932107	-1	60
5702126	C[C@]12C[C@@H]([C@]3(C(C1C[C@@H]4[C@]2(OC(O4)(C)C)C(=O)CO)CCC5=CC(=O)C=C[C@@]53C)F)O	1467932107	-1	60
6710659	CC(=O)OCC(=O)[C@]1(CCC2[C@@]1(C[C@@H]([C@]3(C2CCC4=CC(=O)CC[C@@]43C)F)O)C)O	1467932138	-1	38.0667
54746	CCNC(=O)N(CCCN(C)C)C(=O)[C@@H]1C[C@H]2[C@@H](CC3=CNC4=CC=CC2=C34)N(C1)CC=C	1467932149	-1	10.6408
4039	CN(C)CCOC(=O)COC1=CC=C(C=C1)Cl	1467932179	-1	9.6338
3735	CCC(CC1=C(C(=C(C=C1I)I)N)I)C(=O)O	1467932258	-1	32.2423
3830	C1=COC(=C1)CNC2=NC=NC3=C2NC=N3	1467932742	-1	2.44737
6890	CN(C)CC1=CNC2=CC=CC=C21	1467933107	-1	0.915152
1832	CN(C)CCC1=CNC2=C1C=C(C=C2)OC	1467933164	-1	3.54725
34751	C1=CC=C(C=C1)C(C#N)O[C@H]2[C@@H]([C@H]([C@@H]([C@H](O2)CO[C@H]3[C@@H]([C@H]([C@@H]([C@H](O3)CO)O)O)O)O)O)O	1467933390	-1	13.3724
16667677	COC1C[C@@H]2C3(C=C1)[C@@H](CN2CC4=CC5=C(C=C34)OCO5)O	1467935703	-1	2.65455
441594	CN1CCC2=C[C@@H]([C@@H]3[C@H]([C@@H]21)C4=CC5=C(C=C4C(=O)O3)OCO5)O	1467935745	-1	3.09696
72378	C1CN2CC3=CC4=C(C=C3[C@H]5[C@H]2C1=C[C@@H]([C@H]5O)O)OCO4	1467935793	1	2.6519
6713967	C1CN2CC3=CC4=C(C=C3[C@H]5C2C1=C[C@@H]([C@H]5O)O)OCO4	1467935793	-1	2.6519
6602494	C1CN2CC3=CC4=C(C=C3C5C2C1=C[C@@H]([C@H]5O)O)OCO4	1467935793	-1	2.6519
72378	C1CN2CC3=CC4=C(C=C3[C@H]5[C@H]2C1=C[C@@H]([C@H]5O)O)OCO4	1467935793	1	2.6519
6713967	C1CN2CC3=CC4=C(C=C3[C@H]5C2C1=C[C@@H]([C@H]5O)O)OCO4	1467935793	-1	2.6519
6602494	C1CN2CC3=CC4=C(C=C3C5C2C1=C[C@@H]([C@H]5O)O)OCO4	1467935793	-1	2.6519
72378	C1CN2CC3=CC4=C(C=C3[C@H]5[C@H]2C1=C[C@@H]([C@H]5O)O)OCO4	1467935793	1	2.6519
6713967	C1CN2CC3=CC4=C(C=C3[C@H]5C2C1=C[C@@H]([C@H]5O)O)OCO4	1467935793	-1	2.6519
6602494	C1CN2CC3=CC4=C(C=C3C5C2C1=C[C@@H]([C@H]5O)O)OCO4	1467935793	-1	2.6519
64971	CC(=C)[C@@H]1CC[C@]2([C@H]1[C@H]3CC[C@@H]4[C@]5(CC[C@@H](C([C@@H]5CC[C@]4([C@@]3(CC2)C)C)(C)C)O)C)C(=O)O	1467936908	-1	1.79355
638278	C1=CC(=CC=C1/C=C/C(=O)C2=C(C=C(C=C2)O)O)O	1467937279	-1	13.9463
441720	CCN1C[C@@]2(CC[C@@H]([C@@]34[C@@H]2C[C@@H](C31)[C@]5(C[C@@H]([C@H]6C[C@@H]4[C@@H]5[C@H]6OC(=O)C)OC)O)O)COC	1467937540	-1	0.463391
5460428	CCN1C[C@@]2(CC[C@@H]([C@@]34[C@@H]2[C@@H]([C@]5(C31)[C@]6(C[C@@H]([C@H]7C[C@@]4([C@@H]6[C@H]7OC)O)OC)OCO5)OC(=O)C)OC)C	1467937636	-1	1.05996
23986045	CCN1C[C@@]2(CC[C@@H]([C@@]34[C@@H]2C[C@@H](C31)[C@]5(C[C@@H]([C@H]6C[C@@H]4[C@@H]5C6O)OC)O)O)C	1467937807	-1	0
6708666	C[C@@H]1[C@H]([C@H](C[C@@H](O1)O[C@H]2CC[C@]3([C@@H](C2)CC[C@@H]4C3CC[C@]5([C@@]4(C[C@@H]([C@@H]5C6=CC(=O)OC6)O)O)C)C)O)OC7C[C@@H]([C@@H]([C@H](O7)C)OC8C[C@@H](C([C@H](O8)C)O)O)O	1467939892	1	62
5702170	C[C@H]1[C@@H]([C@H]([C@@H]([C@@H](O1)O[C@H]2CC[C@]3([C@@H](C2)CCC4C3CC[C@]5([C@@]4(CCC5C6=CC(=O)OC6)O)C)C)O)OC)O	1467940020	1	31.2275
64945	C[C@@H]1CC[C@@]2(CC[C@@]3(C(=CC[C@H]4[C@]3(CC[C@@H]5[C@@]4(CC[C@@H](C5(C)C)O)C)C)[C@@H]2[C@H]1C)C)C(=O)O	1467941399	-1	2
100768	CC(=O)C1=C(C=C2C(=C1)C=CC(O2)(C)C)O	1467941620	-1	1.88988
3828	CC1=CC(=O)C2=C(C3=C(C(=C2O1)OC)OC=C3)OC	1467941669	-1	2.85399
251561	CC1C2CN3CCC4=C(C3CC2C(=CO1)C(=O)OC)NC5=CC=CC=C45	1467941844	-1	15.1651
441975	C[C@H]1[C@H]2CN3CCC4=C([C@@H]3C[C@@H]2C(=CO1)C(=O)OC)NC5=CC=CC=C45	1467941844	-1	15.1651
251561	CC1C2CN3CCC4=C(C3CC2C(=CO1)C(=O)OC)NC5=CC=CC=C45	1467941844	-1	15.1651
441975	C[C@H]1[C@H]2CN3CCC4=C([C@@H]3C[C@@H]2C(=CO1)C(=O)OC)NC5=CC=CC=C45	1467941844	-1	15.1651
6716	CC1=CC(=O)C2=C(O1)C=C3C(=C2OC)C=CO3	1467942140	-1	4.82179
9649	COC1=C(C=C2C(=C1)[C@]34CCN5[C@H]3C[C@@H]6[C@@H]7C4N2C(=O)CC7OCC=C6C5)OC	1467942563	-1	1.7756
5284639	C1=CC(=CC=C1C2=COC3=CC(=CC(=C3C2=O)O)OC4C(C(C(C(O4)CO)O)O)O)O	1467943074	-1	11.1667
71203	CC[C@@]12CCCN3[C@@H]1C4=C(CC3)C5=CC=CC=C5N4C(=O)C2	1467943362	-1	3.47216
3213	CC1=C2C(=C(C3=C1C=CN=C3)C)C4=CC=CC=C4N2	1467943424	-1	3
3213	CC1=C2C(=C(C3=C1C=CN=C3)C)C4=CC=CC=C4N2	1467943424	1	3
3213	CC1=C2C(=C(C3=C1C=CN=C3)C)C4=CC=CC=C4N2	1467943424	-1	3
3213	CC1=C2C(=C(C3=C1C=CN=C3)C)C4=CC=CC=C4N2	1467943424	1	3
24058665	C[C@@H]1[C@H]([C@]2([C@@H](C2(C)C)[C@H]3[C@@]1([C@@H]4C=C(C(=O)[C@]4(CC(=C3)CO)O)C)O)O)O	1467943437	-1	9.28798
73453	CC(C)[C@H]1C(=O)N2CCC[C@H]2[C@]3(N1C(=O)[C@](O3)(C(C)C)NC(=O)[C@H]4CN([C@@H]5CC6=CNC7=CC=CC(=C67)C5=C4)C)O	1467943526	-1	11.6995
31116	CC(C)[C@@]1(C(=O)N2[C@H](C(=O)N3CCC[C@H]3[C@@]2(O1)O)CC4=CC=CC=C4)NC(=O)[C@H]5CN([C@@H]6CC7=CNC8=CC=CC(=C78)C6=C5)C	1467943550	-1	11.9043
107985	CC(C)[C@@]12[C@@H](O1)[C@H]3[C@@]4(O3)[C@]5(CCC6=C([C@@H]5C[C@H]7[C@]4([C@@H]2O)O7)COC6=O)C	1467944030	1	77.1286
23817963	CN1C[C@@]2([C@H]3[C@H]1[C@@H]4C2CC([C@@]35C6=CC=CC=C6NC5=O)OC4)C=C	1467944066	-1	0.648142
15376	CC[C@@]12CCCN3[C@@H]1C4=C(CC3)C5=CC=CC=C5N4[C@](C2)(C(=O)OC)O	1467944603	-1	3.02672
637570	CC[C@@]12CCCN3[C@@H]1C4=C(CC3)C5=CC=CC=C5N4[C@@](C2)(C(=O)OC)O	1467944603	-1	3.02672
15376	CC[C@@]12CCCN3[C@@H]1C4=C(CC3)C5=CC=CC=C5N4[C@](C2)(C(=O)OC)O	1467944603	-1	3.02672
637570	CC[C@@]12CCCN3[C@@H]1C4=C(CC3)C5=CC=CC=C5N4[C@@](C2)(C(=O)OC)O	1467944603	-1	3.02672
8969	COC(=O)[C@H]1[C@H](CC[C@@H]2[C@@H]1C[C@H]3C4=C(CCN3C2)C5=CC=CC=C5N4)O	1467944664	-1	8.64094
643606	COC(=O)[C@@H]1[C@H](CC[C@H]2[C@@H]1C[C@H]3C4=C(CCN3C2)C5=CC=CC=C5N4)O	1467944664	-1	8.64094
92766	COC(=O)[C@@H]1[C@H](CC[C@@H]2[C@@H]1C[C@H]3C4=C(CCN3C2)C5=CC=CC=C5N4)O	1467944664	-1	8.64094
5702140	COC(=O)C1[C@H](CC[C@@H]2[C@@H]1C[C@H]3C4=C(CCN3C2)C5=CC=CC=C5N4)O	1467944664	-1	8.64094
8969	COC(=O)[C@H]1[C@H](CC[C@@H]2[C@@H]1C[C@H]3C4=C(CCN3C2)C5=CC=CC=C5N4)O	1467944664	-1	8.64094
643606	COC(=O)[C@@H]1[C@H](CC[C@H]2[C@@H]1C[C@H]3C4=C(CCN3C2)C5=CC=CC=C5N4)O	1467944664	-1	8.64094
92766	COC(=O)[C@@H]1[C@H](CC[C@@H]2[C@@H]1C[C@H]3C4=C(CCN3C2)C5=CC=CC=C5N4)O	1467944664	-1	8.64094
5702140	COC(=O)C1[C@H](CC[C@@H]2[C@@H]1C[C@H]3C4=C(CCN3C2)C5=CC=CC=C5N4)O	1467944664	-1	8.64094
8969	COC(=O)[C@H]1[C@H](CC[C@@H]2[C@@H]1C[C@H]3C4=C(CCN3C2)C5=CC=CC=C5N4)O	1467944664	-1	8.64094
643606	COC(=O)[C@@H]1[C@H](CC[C@H]2[C@@H]1C[C@H]3C4=C(CCN3C2)C5=CC=CC=C5N4)O	1467944664	-1	8.64094
92766	COC(=O)[C@@H]1[C@H](CC[C@@H]2[C@@H]1C[C@H]3C4=C(CCN3C2)C5=CC=CC=C5N4)O	1467944664	-1	8.64094
5702140	COC(=O)C1[C@H](CC[C@@H]2[C@@H]1C[C@H]3C4=C(CCN3C2)C5=CC=CC=C5N4)O	1467944664	-1	8.64094
8969	COC(=O)[C@H]1[C@H](CC[C@@H]2[C@@H]1C[C@H]3C4=C(CCN3C2)C5=CC=CC=C5N4)O	1467944664	-1	8.64094
643606	COC(=O)[C@@H]1[C@H](CC[C@H]2[C@@H]1C[C@H]3C4=C(CCN3C2)C5=CC=CC=C5N4)O	1467944664	-1	8.64094
92766	COC(=O)[C@@H]1[C@H](CC[C@@H]2[C@@H]1C[C@H]3C4=C(CCN3C2)C5=CC=CC=C5N4)O	1467944664	-1	8.64094
5702140	COC(=O)C1[C@H](CC[C@@H]2[C@@H]1C[C@H]3C4=C(CCN3C2)C5=CC=CC=C5N4)O	1467944664	-1	8.64094
2841560	CC(C)CC(=O)OC1C(C2=C(C=CC3=C2OC(=O)C=C3)OC1(C)C)OC(=O)C	1467944712	-1	6.78023
442128	CC(C)CC(=O)O[C@@H]1[C@@H](C2=C(C=CC3=C2OC(=O)C=C3)OC1(C)C)OC(=O)C	1467944712	-1	6.78023
2841560	CC(C)CC(=O)OC1C(C2=C(C=CC3=C2OC(=O)C=C3)OC1(C)C)OC(=O)C	1467944712	-1	6.78023
442128	CC(C)CC(=O)O[C@@H]1[C@@H](C2=C(C=CC3=C2OC(=O)C=C3)OC1(C)C)OC(=O)C	1467944712	-1	6.78023
5281416	C1=CC(=O)OC2=CC(=C(C=C21)O)O	1467944747	-1	27.0375
15558439	C1=CC(=O)OC2=CC(=C(C=C21)OC3[C@@H]([C@H]([C@@H]([C@H](O3)CO)O)O)O)O	1467944760	-1	9.02858
5281417	C1=CC(=O)OC2=CC(=C(C=C21)O[C@H]3[C@@H]([C@H]([C@@H]([C@H](O3)CO)O)O)O)O	1467944760	-1	9.02858
15558439	C1=CC(=O)OC2=CC(=C(C=C21)OC3[C@@H]([C@H]([C@@H]([C@H](O3)CO)O)O)O)O	1467944760	-1	9.02858
5281417	C1=CC(=O)OC2=CC(=C(C=C21)O[C@H]3[C@@H]([C@H]([C@@H]([C@H](O3)CO)O)O)O)O	1467944760	-1	9.02858
5273569	COC1=C(C(=C2C(=C1)C=CC(=O)O2)O)O	1467944773	-1	15.227
334704	CC(C)([C@@H]1CC2=C(O1)C=C3C(=C2)C=CC(=O)O3)O	1467944906	-1	3.36692
10228	CC(=CCC1=C(C=CC2=C1OC(=O)C=C2)OC)C	1467944956	-1	3.09251
8616	CC(C)C1=C(C2=C(O1)C=C3C(=C2)C=CC(=O)O3)OC	1467944992	-1	10.5532
4825	COC1=C(C2=C(C=CO2)C3=C1C=CC(=O)O3)OC	1467945016	-1	11.3959
167683	C[C@H]1[C@@H]2CCC(=C3[C@@H]([C@H]2OC1=O)C(=CC3=O)C)C	1467945040	-1	19.2011
5316002	C/C=C(/C)\C(=O)OC1C(C(OC2=C1C3=C(C=C2)C=CC(=O)O3)(C)C)OC(=O)C	1467945288	-1	3.95229
5287281	C/C=C(\C)/C(=O)OC1C(C(OC2=C1C3=C(C=C2)C=CC(=O)O3)(C)C)OC(=O)C	1467945288	-1	3.95229
5320509	C/C=C(\C)/C(=O)O[C@H]1[C@H](C(OC2=C1C3=C(C=C2)C=CC(=O)O3)(C)C)OC(=O)C	1467945288	-1	3.95229
5316002	C/C=C(/C)\C(=O)OC1C(C(OC2=C1C3=C(C=C2)C=CC(=O)O3)(C)C)OC(=O)C	1467945288	-1	3.95229
5287281	C/C=C(\C)/C(=O)OC1C(C(OC2=C1C3=C(C=C2)C=CC(=O)O3)(C)C)OC(=O)C	1467945288	-1	3.95229
5320509	C/C=C(\C)/C(=O)O[C@H]1[C@H](C(OC2=C1C3=C(C=C2)C=CC(=O)O3)(C)C)OC(=O)C	1467945288	-1	3.95229
5316002	C/C=C(/C)\C(=O)OC1C(C(OC2=C1C3=C(C=C2)C=CC(=O)O3)(C)C)OC(=O)C	1467945288	-1	3.95229
5287281	C/C=C(\C)/C(=O)OC1C(C(OC2=C1C3=C(C=C2)C=CC(=O)O3)(C)C)OC(=O)C	1467945288	-1	3.95229
5320509	C/C=C(\C)/C(=O)O[C@H]1[C@H](C(OC2=C1C3=C(C=C2)C=CC(=O)O3)(C)C)OC(=O)C	1467945288	-1	3.95229
5585	CC1=CC(=O)OC2=C1C=C3C=C(OC3=C2C)C	1467945374	-1	11.8182
5281426	C1=CC(=CC2=C1C=CC(=O)O2)O	1467945387	-1	6.35152
443639	C1[C@H]([C@H](OC2=CC(=CC(=C21)O)O)C3=CC=C(C=C3)O)O	1467945452	-1	11.2243
98348	CN1CCC2=CC(=C(C=C2C1CC3=CC=C(C=C3)O)OC)OC	1467945718	-1	1.99324
10154	CN1CCC2=CC(=C(C3=C2[C@@H]1CC4=CC(=C(C=C43)OC)O)OC)O	1467945994	-1	12.4338
248507	CN1CCC2=CC(=C(C3=C2C1CC4=CC(=C(C=C43)OC)O)OC)O	1467945994	-1	12.4338
10154	CN1CCC2=CC(=C(C3=C2[C@@H]1CC4=CC(=C(C=C43)OC)O)OC)O	1467945994	-1	12.4338
248507	CN1CCC2=CC(=C(C3=C2C1CC4=CC(=C(C=C43)OC)O)OC)O	1467945994	-1	12.4338
442195	CC[C@H]1CN2CCC3=CC(=C(C=C3[C@@H]2C[C@@H]1C[C@@H]4C5=CC(=C(C=C5CCN4)O)OC)OC)OC	1467946301	1	2.72743
10145	CN1CCC2=CC(=C(C3=C2C1CC4=CC(=C(C=C43)OC)OC)OC)OC	1467946973	-1	2.69441
197835	CN1CCC2=CC3=C(C=C2[C@@H]1[C@@H]4C5=C(C(=C(C=C5)OC)OC)C(=O)O4)OCO3	1467947165	-1	7.81976
656743	CN1CCC2=CC3=C(C=C2[C@H]1[C@H]4C5=C(C(=C(C=C5)OC)OC)C(=O)O4)OCO3	1467947165	-1	7.81976
442247	CN1CCC2=CC3=C(C=C2[C@@H]1[C@H]4C5=C(C(=C(C=C5)OC)OC)C(=O)O4)OCO3	1467947165	-1	7.81976
6546945	CN1CCC2=CC3=C(C=C2[C@H]1[C@@H]4C5=C(C(=C(C=C5)OC)OC)C(=O)O4)OCO3	1467947165	-1	7.81976
197835	CN1CCC2=CC3=C(C=C2[C@@H]1[C@@H]4C5=C(C(=C(C=C5)OC)OC)C(=O)O4)OCO3	1467947165	-1	7.81976
656743	CN1CCC2=CC3=C(C=C2[C@H]1[C@H]4C5=C(C(=C(C=C5)OC)OC)C(=O)O4)OCO3	1467947165	-1	7.81976
442247	CN1CCC2=CC3=C(C=C2[C@@H]1[C@H]4C5=C(C(=C(C=C5)OC)OC)C(=O)O4)OCO3	1467947165	-1	7.81976
6546945	CN1CCC2=CC3=C(C=C2[C@H]1[C@@H]4C5=C(C(=C(C=C5)OC)OC)C(=O)O4)OCO3	1467947165	-1	7.81976
197835	CN1CCC2=CC3=C(C=C2[C@@H]1[C@@H]4C5=C(C(=C(C=C5)OC)OC)C(=O)O4)OCO3	1467947165	-1	7.81976
656743	CN1CCC2=CC3=C(C=C2[C@H]1[C@H]4C5=C(C(=C(C=C5)OC)OC)C(=O)O4)OCO3	1467947165	-1	7.81976
442247	CN1CCC2=CC3=C(C=C2[C@@H]1[C@H]4C5=C(C(=C(C=C5)OC)OC)C(=O)O4)OCO3	1467947165	-1	7.81976
6546945	CN1CCC2=CC3=C(C=C2[C@H]1[C@@H]4C5=C(C(=C(C=C5)OC)OC)C(=O)O4)OCO3	1467947165	-1	7.81976
197835	CN1CCC2=CC3=C(C=C2[C@@H]1[C@@H]4C5=C(C(=C(C=C5)OC)OC)C(=O)O4)OCO3	1467947165	-1	7.81976
656743	CN1CCC2=CC3=C(C=C2[C@H]1[C@H]4C5=C(C(=C(C=C5)OC)OC)C(=O)O4)OCO3	1467947165	-1	7.81976
442247	CN1CCC2=CC3=C(C=C2[C@@H]1[C@H]4C5=C(C(=C(C=C5)OC)OC)C(=O)O4)OCO3	1467947165	-1	7.81976
6546945	CN1CCC2=CC3=C(C=C2[C@H]1[C@@H]4C5=C(C(=C(C=C5)OC)OC)C(=O)O4)OCO3	1467947165	-1	7.81976
24041599	CC(=C)[C@H]1[C@@H]2[C@@H]3[C@@]4([C@](C1C(=O)O2)(CC5[C@]4(O5)C(=O)O3)O)C	1467947975	-1	20.2746
442292	CC(=C)[C@@H]1[C@@H]2[C@@H]3[C@@]4([C@]([C@H]1C(=O)O2)(C[C@@H]5[C@]4(O5)C(=O)O3)O)C	1467947975	-1	20.2746
24041599	CC(=C)[C@H]1[C@@H]2[C@@H]3[C@@]4([C@](C1C(=O)O2)(CC5[C@]4(O5)C(=O)O3)O)C	1467947975	-1	20.2746
442292	CC(=C)[C@@H]1[C@@H]2[C@@H]3[C@@]4([C@]([C@H]1C(=O)O2)(C[C@@H]5[C@]4(O5)C(=O)O3)O)C	1467947975	-1	20.2746
10143	CN1CCC2=CC(=C(C3=C2[C@@H]1CC4=C3C(=C(C=C4)OC)O)OC)OC	1467948223	-1	7.86552
15548	CN1CCC2=CC(=C(C=C2C1CC3=CC(=C(C=C3)OC)OC)OC)OC	1467948333	-1	3.60993
446378	CCCCCCCC(=O)O[C@H]1[C@H]2C(=C([C@@H]1OC(=O)/C(=C\C)/C)C)[C@H]3[C@]([C@H](C[C@]2(C)OC(=O)C)OC(=O)CCC)([C@](C(=O)O3)(C)O)O	1467948370	-1	18.9348
275196	CN1CCC2=CC3=C(C(=C2[C@@H]1[C@@H]4C5=C(C(=C(C=C5)OC)OC)C(=O)O4)OC)OCO3	1467948745	-1	8.78697
4544	CN1CCC2=CC3=C(C(=C2C1C4C5=C(C(=C(C=C5)OC)OC)C(=O)O4)OC)OCO3	1467948745	-1	8.78697
31411	CN1CCC2=CC3=C(C(=C2[C@@H]1[C@H]4C5=C(C(=C(C=C5)OC)OC)C(=O)O4)OC)OCO3	1467948745	-1	8.78697
275196	CN1CCC2=CC3=C(C(=C2[C@@H]1[C@@H]4C5=C(C(=C(C=C5)OC)OC)C(=O)O4)OC)OCO3	1467948745	-1	8.78697
4544	CN1CCC2=CC3=C(C(=C2C1C4C5=C(C(=C(C=C5)OC)OC)C(=O)O4)OC)OCO3	1467948745	-1	8.78697
31411	CN1CCC2=CC3=C(C(=C2[C@@H]1[C@H]4C5=C(C(=C(C=C5)OC)OC)C(=O)O4)OC)OCO3	1467948745	-1	8.78697
275196	CN1CCC2=CC3=C(C(=C2[C@@H]1[C@@H]4C5=C(C(=C(C=C5)OC)OC)C(=O)O4)OC)OCO3	1467948745	-1	8.78697
4544	CN1CCC2=CC3=C(C(=C2C1C4C5=C(C(=C(C=C5)OC)OC)C(=O)O4)OC)OCO3	1467948745	-1	8.78697
31411	CN1CCC2=CC3=C(C(=C2[C@@H]1[C@H]4C5=C(C(=C(C=C5)OC)OC)C(=O)O4)OC)OCO3	1467948745	-1	8.78697
5462437	CN1CC[C@]23[C@@H]4[C@H](CC=C2[C@H]1CC5=C3C(=C(C=C5)OC)O4)O	1467948770	-1	2.92402
46695	CC1C2=CC(=C(C=C2CCN1)O)OC	1467949330	-1	0.548638
5459308	CN1CC[C@@]23CC(=O)C(=C[C@@H]2[C@@H]1CC4=C3C(=C(C=C4)OC)O)OC	1467949368	-1	14.6098
73078	CN1CCC2=CC(=C3C=C2[C@@H]1CC4=CC=C(C=C4)OC5=C(C=CC(=C5)C[C@H]6C7=C(O3)C(=C(C=C7CCN6C)OC)OC)OC)OC	1467949503	-1	15.4674
5701999	C[C@H]1[C@@H]([C@H]([C@H]([C@H](O1)OC[C@@H]2[C@H]([C@@H]([C@H]([C@@H](O2)OC3=CC(=C4C(=O)C[C@H](OC4=C3)C5=CC(=C(C=C5)OC)O)O)O)O)O)O)O)O	1467950744	-1	14.2202
10621	C[C@H]1[C@@H]([C@H]([C@H]([C@@H](O1)OC[C@@H]2[C@H]([C@@H]([C@H]([C@@H](O2)OC3=CC(=C4C(=O)C[C@H](OC4=C3)C5=CC(=C(C=C5)OC)O)O)O)O)O)O)O)O	1467950744	-1	14.2202
5701999	C[C@H]1[C@@H]([C@H]([C@H]([C@H](O1)OC[C@@H]2[C@H]([C@@H]([C@H]([C@@H](O2)OC3=CC(=C4C(=O)C[C@H](OC4=C3)C5=CC(=C(C=C5)OC)O)O)O)O)O)O)O)O	1467950744	-1	14.2202
10621	C[C@H]1[C@@H]([C@H]([C@H]([C@@H](O1)OC[C@@H]2[C@H]([C@@H]([C@H]([C@@H](O2)OC3=CC(=C4C(=O)C[C@H](OC4=C3)C5=CC(=C(C=C5)OC)O)O)O)O)O)O)O)O	1467950744	-1	14.2202
5281542	C[C@@]1(C[C@H]([C@]2([C@@H]1[C@@H](OC=C2)O[C@H]3[C@@H]([C@H]([C@@H]([C@H](O3)CO)O)O)O)O)O)OC(=O)/C=C/C4=CC=CC=C4	1467951103	-1	18.6052
442428	C[C@H]1[C@@H]([C@H]([C@H]([C@@H](O1)O[C@@H]2[C@H]([C@@H]([C@H](O[C@H]2OC3=CC(=C4C(=O)C[C@H](OC4=C3)C5=CC=C(C=C5)O)O)CO)O)O)O)O)O	1467951178	-1	18.6928
6710627	C[C@H]1[C@@H]([C@H]([C@H]([C@@H](O1)O[C@@H]2[C@H]([C@@H]([C@H](O[C@@H]2OC3=CC(=C4C(=O)C[C@H](OC4=C3)C5=CC=C(C=C5)O)O)CO)O)O)O)O)O	1467951178	-1	18.6928
442428	C[C@H]1[C@@H]([C@H]([C@H]([C@@H](O1)O[C@@H]2[C@H]([C@@H]([C@H](O[C@H]2OC3=CC(=C4C(=O)C[C@H](OC4=C3)C5=CC=C(C=C5)O)O)CO)O)O)O)O)O	1467951178	-1	18.6928
6710627	C[C@H]1[C@@H]([C@H]([C@H]([C@@H](O1)O[C@@H]2[C@H]([C@@H]([C@H](O[C@@H]2OC3=CC(=C4C(=O)C[C@H](OC4=C3)C5=CC=C(C=C5)O)O)CO)O)O)O)O)O	1467951178	-1	18.6928
68071	C1[C@H](OC2=CC(=CC(=C2C1=O)O)O)C3=CC=CC=C3	1467951620	-1	13.6312
2743	CC(=CC1C(C1(C)C)C(=O)O)C	1467951801	-1	1.31304
2356	COC1=C(C=C2C(=C1O)C3C(C(C(C(O3)CO)O)O)OC2=O)O	1467952763	-1	23.271
6708706	COC1=C(C=C2C(=C1O)[C@@H]3[C@H]([C@H]([C@@H]([C@H](O3)CO)O)O)OC2=O)O	1467952763	-1	23.271
2356	COC1=C(C=C2C(=C1O)C3C(C(C(C(O3)CO)O)O)OC2=O)O	1467952763	-1	23.271
6708706	COC1=C(C=C2C(=C1O)[C@@H]3[C@H]([C@H]([C@@H]([C@H](O3)CO)O)O)OC2=O)O	1467952763	-1	23.271
5369129	COC1=CC(=O)OC(C1)/C=C/C2=CC=CC=C2	1467953106	-1	3.21483
5281565	COC1=CC(=O)O[C@H](C1)/C=C/C2=CC=CC=C2	1467953106	-1	3.21483
5369129	COC1=CC(=O)OC(C1)/C=C/C2=CC=CC=C2	1467953106	-1	3.21483
5281565	COC1=CC(=O)O[C@H](C1)/C=C/C2=CC=CC=C2	1467953106	-1	3.21483
5281571	C1=CC(=O)C(=C2C(=C1)C=C(C(=C2O)O)O)O	1467953312	-1	11.2418
5281576	C[C@H]1CCCC(=O)CCC/C=C/C2=CC(=CC(=C2C(=O)O1)O)O	1467953520	-1	19.4672
5281607	C1=CC=C(C=C1)C2=CC(=O)C3=C(C=C(C=C3O2)O)O	1467954101	-1	7.43194
88881	COC1=CC(=C2C(=C1)OC(=CC2=O)C3=CC=CC=C3)OC	1467954116	-1	0.886047
5281617	COC1=CC(=C2C(=C1)OC(=CC2=O)C3=CC=C(C=C3)O)O	1467954348	-1	3.67816
5271805	COC1=C(C=C(C=C1)C2=CC(=O)C3=C(C=C(C=C3O2)OC)O)C4=C(C=C(C5=C4OC(=CC5=O)C6=CC=C(C=C6)O)O)O	1467954376	-1	4.72675
5281646	CC1(C=CC2=C(C3=C(C(=C2O1)C(C)(C)C=C)OC4=C(C3=O)C=CC(=C4O)O)O)C	1467954737	-1	11.7177
5281650	CC(=CCC1=C(C=C2C(=C1O)C(=O)C3=C(C(=C(C=C3O2)O)OC)CC=C(C)C)O)C	1467954790	-1	5.51402
5281670	C1=CC(=C(C=C1O)O)C2=C(C(=O)C3=C(C=C(C=C3O2)O)O)O	1467955101	-1	16.3544
5281672	C1=C(C=C(C(=C1O)O)O)C2=C(C(=O)C3=C(C=C(C=C3O2)O)O)O	1467955129	-1	40.3472
72344	COC1=C(C=C(C=C1)C2=CC(=O)C3=C(O2)C(=C(C(=C3OC)OC)OC)OC)OC	1467955193	-1	10.9804
2230	CN1CCC=C(C1)C(=O)OC	1467955419	-1	1.68493
3442	CCCCC1=CN=C(C=C1)C(=O)O	1467955627	-1	1.87364
96946	CN1C(CCCC1CC(C2=CC=CC=C2)O)CC(C3=CC=CC=C3)O	1467955747	-1	0
442649	C1CC(=NC1)C2=CN=CC=C2	1467955796	-1	0.646546
637858	COC1=CC(=CC(=C1OC)OC)/C=C/C(=O)N2CCC=CC2=O	1467955873	-1	8.24808
5281707	C1=CC2=C(C=C1O)OC3=C2C(=O)OC4=C3C=CC(=C4)O	1467956379	-1	7.98501
5281708	C1=CC(=CC=C1C2=COC3=C(C2=O)C=CC(=C3)O)O	1467956419	-1	3.33967
5281719	COC1=CC(=CC(=C1)O)/C=C/C2=CC=CC=C2	1467957279	-1	11.0948
637213	COC1=C(C=C(C=C1)/C=C/C2=CC(=CC(=C2)O[C@H]3[C@@H]([C@H]([C@@H]([C@H](O3)CO)O)O)O)O)O	1467957429	-1	5.98123
2950	C1=CC2=C(C(=C1)O)C(=O)C3=C(C2=O)C=CC=C3O	1467957728	-1	20.4507
10208	CC1=CC(=C2C(=C1)C(=O)C3=C(C2=O)C(=CC=C3)O)O	1467957770	-1	19.5517
23930397	C[C@H](C(C(C)C)(C(=O)OCC1=CCN2[C@H]1[C@H](CC2)O)O)OC	1467957885	-1	11
3220	CC1=CC(=C2C(=C1)C(=O)C3=CC(=CC(=C3C2=O)O)O)O	1467958122	-1	25.6545
9415	C[C@H]1C(=O)O[C@@H]2CCN3[C@@H]2C(=CC3)COC(=O)[C@]([C@]1(C)O)(C)O	1467958212	-1	15.23
5281743	C/C=C\1/C[C@H]([C@@](C(=O)OCC2=CCN3[C@H]2[C@@H](CC3)OC1=O)(CO)O)C	1467958383	-1	9.96389
10205	CC1=CC(=O)C2=C(C1=O)C=CC=C2O	1467958677	-1	30.9181
5281750	C/C=C\1/CC(=C)[C@@](C(=O)OCC2=CCN3[C@H]2[C@@H](CC3)OC1=O)(C)O	1467958725	-1	9.73862
10168	C1=CC2=C(C(=C1)O)C(=O)C3=C(C=C(C=C3C2=O)C(=O)O)O	1467958848	-1	20.5353
10168	C1=CC2=C(C(=C1)O)C(=O)C3=C(C=C(C=C3C2=O)C(=O)O)O	1467958848	1	20.5353
10168	C1=CC2=C(C(=C1)O)C(=O)C3=C(C=C(C=C3C2=O)C(=O)O)O	1467958848	-1	20.5353
10168	C1=CC2=C(C(=C1)O)C(=O)C3=C(C=C(C=C3C2=O)C(=O)O)O	1467958848	1	20.5353
107935	CC1(C=CC2=C(O1)C=CC3=C2O[C@@H]4COC5=CC(=C(C=C5[C@@H]4C3=O)OC)OC)C	1467959053	-1	5.54532
442793	CCCCC[C@@H](CC(=O)CCC1=CC(=C(C=C1)O)OC)O	1467959583	-1	6.71326
5281777	COC1=CC(=CC(=C1OC)O)C2=COC3=CC(=C(C(=C3C2=O)O)OC)O[C@H]4[C@@H]([C@H]([C@@H]([C@H](O4)CO)O)O)O	1467959621	-1	14.5922
5281787	C1=CC=C(C=C1)CCOC(=O)/C=C/C2=CC(=C(C=C2)O)O	1467959858	-1	25.6783
363863	C1C2C(C3=C(O1)C=C(C=C3)O)OC4=CC5=C(C=C24)OCO5	1467960072	-1	1.26629
95168	CC(=CCC1=C(C2=C(C3=C1OC(C=C3)(C)C)OC=C(C2=O)C4=CC=C(C=C4)O)O)C	1467960191	-1	4.96143
5281804	COC1=CC(=C2C(=C1)OC=C(C2=O)C3=CC=C(C=C3)O)O	1467960318	-1	4.34752
6710769	COC1=CC(=CC(=C1O)OC)[C@H]2C3C(COC3=O)[C@@H](C4=CC5=C(C=C24)OCO5)O	1467960714	1	20.5
100492	COC1=C(C=C2C(=C1)C(=C3C(=C2O)COC3=O)C4=CC5=C(C=C4)OCO5)OC	1467960790	1	9
5392245	CN1CC[C@@]23[C@@H]4NC5=CC=CC=C5[C@@]2([C@@H]1NC6=CC=CC=C36)CCN4C	1467960959	-1	10.5763
6338099	C1CCN2[C@H](C1)C34C[C@H]2C=CC3=CC(=O)O4	1467961463	-1	10.3528
442872	C1CCN2[C@H](C1)[C@]34C[C@H]2C=CC3=CC(=O)O4	1467961463	-1	10.3528
6338099	C1CCN2[C@H](C1)C34C[C@H]2C=CC3=CC(=O)O4	1467961463	-1	10.3528
442872	C1CCN2[C@H](C1)[C@]34C[C@H]2C=CC3=CC(=O)O4	1467961463	-1	10.3528
442894	C1CC2=NC3=CC=CC=C3CN2C1	1467961976	-1	1.80645
68261	C1CC2=NC3=CC=CC=C3C(=O)N2C1	1467962013	-1	0
442897	CC(CO)(C1CC2=C(C3=CC=CC=C3N=C2O1)OC)O	1467962050	-1	0.733193
17198	CC(=O)C1=CC(=C(C(=C1)OC)O)OC	1467962074	-1	4.29818
73416	CC(C)(C(COC1=C(C2=C(C=C1)C(=C3C=COC3=N2)OC)OC)O)O	1467962147	-1	6.63095
673465	CC(C)([C@@H](COC1=C(C2=C(C=C1)C(=C3C=COC3=N2)OC)OC)O)O	1467962147	-1	6.63095
73416	CC(C)(C(COC1=C(C2=C(C=C1)C(=C3C=COC3=N2)OC)OC)O)O	1467962147	-1	6.63095
673465	CC(C)([C@@H](COC1=C(C2=C(C=C1)C(=C3C=COC3=N2)OC)OC)O)O	1467962147	-1	6.63095
68230	CC1(C=CC2=C(O1)C3=CC=CC=C3NC2=O)C	1467962256	-1	0.395349
353825	CN1C2=CC=CC=C2C(=O)C=C1C3=CC4=C(C=C3)OCO4	1467962377	-1	1.55167
2837665	CC(=CCC1(C(CCC2=C1N=C3C(=C2OC)C=CO3)O)OC)C	1467962413	-1	0.851351
2734756	CC[C@H]1CN2CCC1C[C@H]2[C@@H](C3=C4C=C(C=CC4=NC=C3)OC)O	1467962463	-1	1.97759
442916	CC(=CCC1=C(C=CC(=C1)C(=O)C)O)C	1467962537	-1	1.82759
11092	CC(=O)C1=C(C=C(C=C1)OC)O	1467962656	-1	4.88549
4534	CC(CC1=CC(=C(C=C1)O)O)C(C)CC2=CC(=C(C=C2)O)O	1467962741	-1	43.35
4534	CC(CC1=CC(=C(C=C1)O)O)C(C)CC2=CC(=C(C=C2)O)O	1467962741	1	43.35
4534	CC(CC1=CC(=C(C=C1)O)O)C(C)CC2=CC(=C(C=C2)O)O	1467962741	-1	43.35
4534	CC(CC1=CC(=C(C=C1)O)O)C(C)CC2=CC(=C(C=C2)O)O	1467962741	1	43.35
66654	CC(=O)C1=C(C=C(C=C1OC)OC)O	1467962828	-1	6.72526
6760	COC1=C(C2=C(C=C1)C(=C3C=COC3=N2)OC)OC	1467962999	-1	5.45401
10235	C1[C@H]2CNC[C@@H]1C3=CC=CC(=O)N3C2	1467963277	-1	3
22407	C1C2CNCC1C3=CC=CC(=O)N3C2	1467963277	-1	3
6708720	C1[C@@H]2CNCC1C3=CC=CC(=O)N3C2	1467963277	-1	3
10235	C1[C@H]2CNC[C@@H]1C3=CC=CC(=O)N3C2	1467963277	-1	3
22407	C1C2CNCC1C3=CC=CC(=O)N3C2	1467963277	-1	3
6708720	C1[C@@H]2CNCC1C3=CC=CC(=O)N3C2	1467963277	-1	3
10235	C1[C@H]2CNC[C@@H]1C3=CC=CC(=O)N3C2	1467963277	-1	3
22407	C1C2CNCC1C3=CC=CC(=O)N3C2	1467963277	-1	3
6708720	C1[C@@H]2CNCC1C3=CC=CC(=O)N3C2	1467963277	-1	3
69505	COC1=CC(=CC(=C1OC)OC)O	1467963301	-1	8.79311
285698	C1CC2C3CCCN4C3C(CCC4)CN2C(=O)C1	1467963410	-1	0
442972	C[C@H]1C[C@@H]2[C@H]([C@H]([C@]3(O2)CC[C@H]4[C@@H]5CC=C6C[C@H](CC[C@@]6([C@H]5CC4=C3C)C)O)C)NC1	1467963702	-1	0.712807
23760134	CC[C@@H](C)C(=O)O[C@H]1[C@@H]([C@H]2[C@@H](CN3C[C@H](CC[C@H]3[C@@]2(C)O)C)C4[C@@]1([C@@H]5[C@@H]([C@@H]([C@H]6[C@]7([C@]5(C4)O[C@]6([C@H](CC7)OC(=O)[C@@](C)(CC)O)O)C)OC(=O)C)OC(=O)C)O)O	1467963914	-1	13.7581
9549171	C[C@H]1CC[C@@H]2[C@H]([C@H]3[C@@H](N2C1)C[C@@H]4[C@@]3(CC[C@H]5[C@H]4CC=C6[C@@]5(CC[C@@H](C6)O[C@H]7[C@@H]([C@H]([C@H]([C@H](O7)CO)O)O[C@H]8[C@@H]([C@H]([C@@H]([C@H](O8)CO)O)O)O)O[C@H]9[C@@H]([C@@H]([C@H]([C@@H](O9)C)O)O)O)C)C)C	1467963974	-1	29.3809
10742	COC1=CC(=CC(=C1O)OC)C(=O)O	1467964137	-1	3.64762
6347545	CN1[C@@H]2CC[C@@H]1CC(C2)OC(=O)C3=CC(=C(C=C3)OC)OC	1467964397	-1	1.88597
933171	CN1[C@@H]2CC[C@H]1CC(C2)OC(=O)C3=CC(=C(C=C3)O)OC	1467964505	-1	1.88597
11096	CN1C2CCCC1CC(=O)C2	1467964529	-1	0
10607	COC1=CC(=CC(=C1OC)OC)[C@H]2[C@@H]3[C@H](COC3=O)[C@H](C4=CC5=C(C=C24)OCO5)O	1467964602	1	15.2552
10607	COC1=CC(=CC(=C1OC)OC)[C@H]2[C@@H]3[C@H](COC3=O)[C@H](C4=CC5=C(C=C24)OCO5)O	1467964602	-1	15.2552
72435	COC1=CC(=CC(=C1OC)OC)[C@H]2[C@H]3[C@H](COC3=O)[C@H](C4=CC5=C(C=C24)OCO5)O	1467964602	1	15.2552
10607	COC1=CC(=CC(=C1OC)OC)[C@H]2[C@@H]3[C@H](COC3=O)[C@H](C4=CC5=C(C=C24)OCO5)O	1467964602	1	15.2552
10607	COC1=CC(=CC(=C1OC)OC)[C@H]2[C@@H]3[C@H](COC3=O)[C@H](C4=CC5=C(C=C24)OCO5)O	1467964602	-1	15.2552
72435	COC1=CC(=CC(=C1OC)OC)[C@H]2[C@H]3[C@H](COC3=O)[C@H](C4=CC5=C(C=C24)OCO5)O	1467964602	1	15.2552
10607	COC1=CC(=CC(=C1OC)OC)[C@H]2[C@@H]3[C@H](COC3=O)[C@H](C4=CC5=C(C=C24)OCO5)O	1467964602	1	15.2552
10607	COC1=CC(=CC(=C1OC)OC)[C@H]2[C@@H]3[C@H](COC3=O)[C@H](C4=CC5=C(C=C24)OCO5)O	1467964602	-1	15.2552
72435	COC1=CC(=CC(=C1OC)OC)[C@H]2[C@H]3[C@H](COC3=O)[C@H](C4=CC5=C(C=C24)OCO5)O	1467964602	1	15.2552
1988	CCC1=CC=CC(=C1N(COCC)C(=O)CCl)C	1467965193	-1	28
2078	CCC1=C(C(=CC=C1)CC)N(COC)C(=O)CCl	1467965224	-1	27.3804
4169	CCC1=CC=CC(=C1N(C(C)COC)C(=O)CCl)C	1467965492	-1	25
2328	CC(C)N1C(=O)C2=CC=CC=C2NS1(=O)=O	1467965617	-1	0
49381	CN1CCN(CC1)C2=NC3=C(CC4=CC=CC=C42)C=CC(=C3)F	1467965637	-1	8.6508
54459	C1CN=C(N1)C2COC3=CC=CC=C3O2	1467965647	-1	0.632997
5053	CC(=CC1C(C1(C)C)C(=O)OCC2=COC(=C2)CC3=CC=CC=C3)C	1467965881	-1	7.36724
9570071	CC(C)(/C=N/OC(=O)NC)SC	1467966144	-1	1.59429
2268	COP(=S)(OC)SCN1C(=O)C2=CC=CC=C2N=N1	1467966176	-1	19.6825
2871	CCOP(=S)(OCC)OC1=CC2=C(C=C1)C(=C(C(=O)O2)Cl)C	1467966250	-1	4.0354
4793	CCOP(=S)(OCC)SCN1C2=C(C=C(C=C2)Cl)OC1=O	1467966278	-1	13.0333
3031	C1=CC(=C(C(=C1)Cl)C#N)Cl	1467966406	-1	4.39361
3352	C1=C(C=C(C(=C1Cl)N2C(=C(C(=N2)C#N)S(=O)C(F)(F)F)N)Cl)C(F)(F)F	1467967014	-1	41.7174
4098	CN(C)CCN(CC1=CC=CS1)C2=CC=CC=N2	1467967168	-1	2.51836
41368	CC(C)(C)C(C(N1C=NC=N1)OC2=CC=C(C=C2)Cl)O	1467967311	-1	3.7037
6708778	COC1=CC(=CC(=C1O)OC)[C@H]2[C@@H]3C(COC3=O)C(C4=CC5=C(C=C24)OCO5)O[C@H]6[C@@H]([C@H](C7[C@H](O6)CO[C@H](O7)C8=CC=CS8)O)O	1467967572	1	51
39385	CC(C)(C)C(=O)C(N1C=NC=N1)OC2=CC=C(C=C2)Cl	1467967606	-1	3.55555
5216	CCNC1=NC(=NC(=N1)Cl)NCC	1467967753	-1	5.53637
1464	CCOC1=CC=C(C=C1)C2=NC3=C(N2)C=C(C=C3)C4=NC5=C(N4)C=C(C=C5)N6CCN(CC6)C	1467967902	1	5.34
5281881	C1CN(CCN1CC/C=C\2/C3=CC=CC=C3SC4=C2C=C(C=C4)C(F)(F)F)CCO	1467967924	-1	22
4212	C1=CC(=C2C(=C1NCCNCCO)C(=O)C3=C(C=CC(=C3C2=O)O)O)NCCNCCO	1467967957	1	92
5360521	C/C(=N/OC(=O)NC)/SC	1467967968	-1	14.2143
16559	C1CCC(CC1)N2C(=O)C3=C(CCC3)NC2=O	1467968000	-1	0
11970251	CC1=C2[C@H](C(=O)[C@@]3([C@H](C[C@@H]4[C@]([C@H]3[C@@H]([C@](C2(C)C)(C[C@@H]1OC(=O)[C@@H]([C@H](C5=CC=CC=C5)NC(=O)OC(C)(C)C)O)O)OC(=O)C6=CC=CC=C6)(CO4)OC(=O)C)O)C)O	1467968289	1	52
11970251	CC1=C2[C@H](C(=O)[C@@]3([C@H](C[C@@H]4[C@]([C@H]3[C@@H]([C@](C2(C)C)(C[C@@H]1OC(=O)[C@@H]([C@H](C5=CC=CC=C5)NC(=O)OC(C)(C)C)O)O)OC(=O)C6=CC=CC=C6)(CO4)OC(=O)C)O)C)O	1467968289	-1	52
11970251	CC1=C2[C@H](C(=O)[C@@]3([C@H](C[C@@H]4[C@]([C@H]3[C@@H]([C@](C2(C)C)(C[C@@H]1OC(=O)[C@@H]([C@H](C5=CC=CC=C5)NC(=O)OC(C)(C)C)O)O)OC(=O)C6=CC=CC=C6)(CO4)OC(=O)C)O)C)O	1467968289	1	52
11970251	CC1=C2[C@H](C(=O)[C@@]3([C@H](C[C@@H]4[C@]([C@H]3[C@@H]([C@](C2(C)C)(C[C@@H]1OC(=O)[C@@H]([C@H](C5=CC=CC=C5)NC(=O)OC(C)(C)C)O)O)OC(=O)C6=CC=CC=C6)(CO4)OC(=O)C)O)C)O	1467968289	-1	52
1236	CC1=C(C(C(=C(N1)C)C(=O)OCCCN2CCC(CC2)(C3=CC=CC=C3)C4=CC=CC=C4)C5=CC(=CC=C5)[N+](=O)[O-])C(=O)OC	1467968341	-1	50.9936
2396	CN(C)CCCN1C=C(C2=CC=CC=C21)C3=C(C(=O)NC3=O)C4=CNC5=CC=CC=C54	1467968366	-1	3.3974
2832	CNC1CCC2=CC(=C(C(=C2C3=CC=C(C(=O)C=C13)OC)OC)OC)OC	1467968468	1	5.32571
21307	CC1=C(SCCO1)C(=O)NC2=CC=CC=C2	1467968523	-1	10.4485
62389	C1=CC=C(C=C1)CNC2=NC=NC3=C2NC=N3	1467968614	-1	2.44737
253602	CC(=O)O[C@@H]1[C@H](CN[C@@H]1CC2=CC=C(C=C2)OC)O	1467968800	1	3.50743
40486	C[C@H]1CCC2([C@@H](C[C@H]([C@H](O2)C(C)C(=O)C3=CC=CN3)C)C)O[C@H]1CC4=NC5=C(O4)C=CC(=C5C(=O)O)NC	1467969063	1	13.9958
4628	CCN1C=C(C(=O)C2=CC3=C(C=C21)OCO3)C(=O)O	1467969414	-1	6.08811
66644	C1=CC=C(C(=C1)C(=O)NO)O	1467969425	-1	9.1746
443278	CC1=CC=C(C=C1)C2=CN3C4=C(CCCC4)SC3=N2	1467971555	-1	0
4364	CC(C)CC(C(=O)NC(CC1=CC=CC=C1)C(=O)O)NC(=O)C(CCSC)NC=O	1467971814	-1	6.89655
4380	CN(CCCOC1=C(C=C(C=C1)Cl)Cl)CC#C	1467972767	-1	6.07408
1204	C1CC2C(CC1N2)C3=CN=C(C=C3)Cl	1467972820	-1	0
5281969	CCCCC/C=C\C/C=C\C/C=C\C/C=C\CCCC(=O)NCCO	1467972863	-1	0
4883	CC(C)NCC(COC1=CC=C(C=C1)NC(=O)C)O	1467972878	-1	0
4930	CC(C)NCC(C1=CC2=CC=CC=C2C=C1)O	1467972994	-1	0.62406
5790	C1[C@@H]([C@H](O[C@H]1N2C=C(C(=O)NC2=O)F)CO)O	1467973290	1	5.86885
5790	C1[C@@H]([C@H](O[C@H]1N2C=C(C(=O)NC2=O)F)CO)O	1467973290	-1	5.86885
5790	C1[C@@H]([C@H](O[C@H]1N2C=C(C(=O)NC2=O)F)CO)O	1467973290	1	5.86885
5790	C1[C@@H]([C@H](O[C@H]1N2C=C(C(=O)NC2=O)F)CO)O	1467973290	-1	5.86885
1355	C1CN(CCN1)C2=CC(=CC=C2)Cl	1467973311	-1	6.13
5315	C1=CC(=CC=C1NC(=O)CCC(=O)O)S(=O)(=O)NC2=NC=CS2	1467973380	-1	14.8434
6713996	CC1=C(C(=NO1)C2=C(C=CC=C2Cl)F)C(=O)N[C@H]3[C@@H]4N(C3=O)C(C(S4)(C)C)C(=O)O	1467973409	-1	19.859
2083	CC(C)(C)NCC(C1=CC(=C(C=C1)O)CO)O	1467973605	-1	3.63964
3748	CC(C)NNC(=O)C1=CC=NC=C1	1467973680	-1	13.4138
6604724	CN([C@H]1CCCC[C@@H]1N2CCCC2)C(=O)CC3=CC(=C(C=C3)Cl)Cl	1467973874	-1	7.2266
4992	CN(C)CCN(CC1=CC=C(C=C1)OC)C2=CC=CC=N2	1467973895	-1	5.87352
4679	COC1=C(C(=NC=C1)CS(=O)C2=NC3=C(N2)C=C(C=C3)OC(F)F)OC	1467973975	-1	12
5702208	CCC(C)[C@@H]1[C@H](C=C[C@@]2(O1)C[C@@H]3C[C@H](O2)C/C=C(/[C@H]([C@H](/C=C/C=C/4\CO[C@H]5[C@@]4([C@@H](C=C([C@H]5O)C)C(=O)O3)O)C)OC6C[C@@H](C([C@@H](O6)C)O[C@H]7C[C@@H]([C@H]([C@@H](O7)C)O)OC)OC)\C)C	1467975920	-1	41.3232
443600	CCCCC[C@H](CC(=O)NO)C(=O)N[C@@H](C(C)C)C(=O)N1CCC[C@H]1CO	1467976668	-1	15.6857
5282054	C/C=C/C/C=C/CCC(=O)[C@@H]1[C@@H](O1)C(=O)N	1467976691	-1	4.84803
5282071	CC[C@@H]1/C=C(/C[C@@H](C[C@@H]([C@@H]2[C@H](C[C@H]([C@@](O2)(C(=O)C(=O)N3CCCC[C@H]3C(=O)O[C@@H]([C@@H]([C@H](CC1=O)O)C)/C(=C/[C@@H]4CC[C@H]([C@@H](C4)OC)O)/C)O)C)OC)OC)C)\C	1467977076	-1	56
2703	C[N+]1=C2C(=C3C=CC(=C(C3=C1)OC)OC)C=CC4=CC5=C(C=C42)OCO5	1467978421	1	17.6154
197810	CN1CC2=C(C=CC3=C2OCO3)[C@@H]4[C@H]1C5=CC6=C(C=C5C[C@@H]4O)OCO6	1467978570	-1	2.34831
10147	CN1CC2=C(C=CC3=C2OCO3)C4C1C5=CC6=C(C=C5CC4O)OCO6	1467978570	1	2.34831
197810	CN1CC2=C(C=CC3=C2OCO3)[C@@H]4[C@H]1C5=CC6=C(C=C5C[C@@H]4O)OCO6	1467978570	-1	2.34831
10147	CN1CC2=C(C=CC3=C2OCO3)C4C1C5=CC6=C(C=C5CC4O)OCO6	1467978570	1	2.34831
5332	COC1=NC=NC(=C1)NS(=O)(=O)C2=CC=C(C=C2)N	1467981102	-1	10.9396
4621	CC(C)(CC1=CC=CC=C1)N(C)C(=O)CN(CCO)CC(=O)N(C)C(C)(C)CC2=CC=CC=C2	1467981112	-1	0
443936	CCCC(=O)O[C@@]1(CC[C@@H]2[C@@]1(C[C@@H]([C@]3([C@H]2C[C@@H](C4=CC(=O)C=C[C@@]43C)F)F)O)C)C(=O)COC(=O)C	1467981764	-1	61.5022
9324	CC(=O)[C@]1(CC[C@@H]2[C@@]1(CC[C@H]3[C@H]2C=C(C4=CC(=O)CC[C@]34C)Cl)C)OC(=O)C	1467981806	-1	34.1875
19003	CC1([C@@H](N2[C@H](S1)[C@@H](C2=O)NC(=O)C3(CCCCC3)N)C(=O)O)C	1467981859	-1	15.9688
443953	CC[C@@H]1[C@@]([C@@H]([C@H](C(=O)[C@@H](C[C@@]([C@@H]([C@H]([C@@H]([C@H](C(=O)O1)C)O[C@H]2C[C@@]([C@H]([C@@H](O2)C)O)(C)OC)C)O[C@H]3[C@@H]([C@H](C[C@H](O3)C)N(C)C)OC(=O)CCC(=O)OCC)(C)O)C)C)O)(C)O	1467981901	-1	45.7842
9828429	C[C@H]1[C@@H]([C@H]([C@H]([C@@H](O1)O[C@H]2CC[C@@]3(C4CC[C@@]5([C@H](CC[C@@]5(C4CCC3=C2)O)C6=COC(=O)C=C6)C)C)O)O)O	1467981945	1	9
13791	CCCCC(=O)O[C@H]1CC[C@@H]2[C@@]1(CC[C@H]3[C@H]2CCC4=C3C=CC(=C4)O)C	1467982094	-1	6.94783
13791	CCCCC(=O)O[C@H]1CC[C@@H]2[C@@]1(CC[C@H]3[C@H]2CCC4=C3C=CC(=C4)O)C	1467982094	1	6.94783
163332	CCCCC(=O)O[C@H]1CCC2[C@@]1(CCC3C2CCC4=C3C=CC(=C4)O)C	1467982094	-1	6.94783
13791	CCCCC(=O)O[C@H]1CC[C@@H]2[C@@]1(CC[C@H]3[C@H]2CCC4=C3C=CC(=C4)O)C	1467982094	-1	6.94783
13791	CCCCC(=O)O[C@H]1CC[C@@H]2[C@@]1(CC[C@H]3[C@H]2CCC4=C3C=CC(=C4)O)C	1467982094	1	6.94783
163332	CCCCC(=O)O[C@H]1CCC2[C@@]1(CCC3C2CCC4=C3C=CC(=C4)O)C	1467982094	-1	6.94783
13791	CCCCC(=O)O[C@H]1CC[C@@H]2[C@@]1(CC[C@H]3[C@H]2CCC4=C3C=CC(=C4)O)C	1467982094	-1	6.94783
13791	CCCCC(=O)O[C@H]1CC[C@@H]2[C@@]1(CC[C@H]3[C@H]2CCC4=C3C=CC(=C4)O)C	1467982094	1	6.94783
163332	CCCCC(=O)O[C@H]1CCC2[C@@]1(CCC3C2CCC4=C3C=CC(=C4)O)C	1467982094	-1	6.94783
4021	CC1=NN(C(=O)C1)C2=CC=CC=C2	1467982474	-1	2.53238
3371	C1=CC=C(C(=C1)C(=O)O)NC2=CC=CC(=C2)C(F)(F)F	1467982548	-1	9.09098
3606	CCC(C1=CC=C(C=C1)O)C(CC)C2=CC=C(C=C2)O	1467982702	-1	6.36066
6674	C[C@H](CCC(=O)O)[C@H]1CC[C@@H]2[C@@]1(C(=O)C[C@H]3[C@H]2C(=O)C[C@H]4[C@@]3(CCC(=O)C4)C)C	1467982863	-1	3.87879
6602440	C[C@H](CCC(=O)O)[C@H]1CCC2[C@@]1(C(=O)CC3C2C(=O)CC4[C@@]3(CCC(=O)C4)C)C	1467982863	-1	3.87879
6674	C[C@H](CCC(=O)O)[C@H]1CC[C@@H]2[C@@]1(C(=O)C[C@H]3[C@H]2C(=O)C[C@H]4[C@@]3(CCC(=O)C4)C)C	1467982863	-1	3.87879
6602440	C[C@H](CCC(=O)O)[C@H]1CCC2[C@@]1(C(=O)CC3C2C(=O)CC4[C@@]3(CCC(=O)C4)C)C	1467982863	-1	3.87879
23846567	CC[C@@H]1[C@@]([C@@H]([C@H](/C(=N/OCOCCOC)/[C@@H](C[C@@]([C@@H]([C@H]([C@@H]([C@H](C(=O)O1)C)OC2C[C@@]([C@H]([C@@H](O2)C)O)(C)OC)C)O[C@H]3[C@@H]([C@H](C[C@H](O3)C)N(C)C)O)(C)O)C)C)O)(C)O	1467982905	-1	62
2206	CC1=CC(=O)N(N1C)C2=CC=CC=C2	1467983052	-1	0
6271	CCC(=O)C1=CC=C(C=C1)O	1467983199	-1	1.30578
2196	COC1=CC=C(C=C1)C(=O)N2CCCC2=O	1467983210	-1	3
96009	CC(=O)OC1=CC=C(C=C1)O	1467984126	-1	6.22966
1354	C1=CC(=CC(=C1)Cl)N=C(N)N=C(N)N	1467984180	-1	11.3063
5595	CN1C2CCC1CC(C2)OC(=O)C3=CNC4=CC=CC=C43	1467984266	-1	1.98611
3272524	C1=CC2=C3C(=CC(=C2C(=C1)S(=O)(=O)N)[N+](=O)[O-])NC(=O)C(=O)N3	1467984277	-1	0
3721046	C1=C(C(=CC2=C1NC(=O)C(=O)N2)[N+](=O)[O-])C#N	1467984288	-1	0
4386	C1=CC=C(C=C1)NC2=CC=CC=C2C(=O)O	1467984564	-1	9.2623
4488	C1=CC(=CC(=C1)NC2=C(C=CC=N2)C(=O)O)C(F)(F)F	1467984576	-1	6.90896
2797	CC(C)(C(=O)O)OC1=CC=C(C=C1)Cl	1467984600	-1	7.42029
656717	C[C@]1(CC2=CC(=C(C(=C2C1=O)Cl)Cl)OCC(=O)O)C3CCCC3	1467984633	-1	8.55351
4549	C1=CC=C(C=C1)CCCNC2=C(C=C(C=C2)[N+](=O)[O-])C(=O)O	1467984654	-1	2.89642
3758	CC(C)CN1C2=C(C(=O)N(C1=O)C)NC=N2	1467984686	-1	1.42542
1329	CCCN1C2=C(C(=O)N(C1=O)CCC)NC(=N2)C3CCCC3	1467984698	-1	2.01215
6337640	C[C@]12C3=CC=CC=C3C[C@H](N1)C4=CC=CC=C24	1467984987	-1	0
180081	C[C@@]12C3=CC=CC=C3C[C@@H](N1)C4=CC=CC=C24	1467984987	-1	0
6337640	C[C@]12C3=CC=CC=C3C[C@H](N1)C4=CC=CC=C24	1467984987	-1	0
180081	C[C@@]12C3=CC=CC=C3C[C@@H](N1)C4=CC=CC=C24	1467984987	-1	0
4687	CN1C=NC2=C1C(=O)N(C(=O)N2)C	1467985091	-1	1.73025
108107	C1=CC=C(C=C1)CN=C(N)NC(=O)C2=C(N=C(C(=N2)Cl)N)N	1467985136	-1	34.2051
4755	C1=CC=C(C=C1)NC(=NC(=O)C2=C(N=C(C(=N2)Cl)N)N)N	1467985146	-1	28.4669
2303	CC1=C(C(C(=C(N1)C)[N+](=O)[O-])C2=CC=CC=C2C(F)(F)F)C(=O)OC	1467985189	-1	12.979
3423	CC1=C(C(=C(N1)C)C(=O)OC)C(=O)C2=CC=CC=C2CC3=CC=CC=C3	1467985200	-1	0.97318
1234	CC(C)C(CCCN(C)CCC1=CC(=C(C=C1)OC)OC)(C#N)C2=CC(=C(C(=C2)OC)OC)OC	1467985252	-1	17.8594
3185	CC1=NC(=CC=C1)CCN2CCC(CC2)C(=O)C3=CC=C(C=C3)NS(=O)(=O)C	1467985349	-1	6.96438
105008	C[C@]12CC[C@H]3C(=CC(=O)[C@H](O3)C(C)(C)O)[C@@]1(CC[C@@H]4[C@@]2(C5=C(C4)C6=CC=CC=C6N5)C)O	1467985406	-1	10.6251
107896	COC1=CC=C(C=C1)C2=NN(C(=N)C=C2)CCCC(=O)O	1467985562	-1	0.929578
5275	COC1=CC=C(C=C1)C2=N[N+](=C(C=C2)N)CCCC(=O)O	1467985562	-1	0.929578
107896	COC1=CC=C(C=C1)C2=NN(C(=N)C=C2)CCCC(=O)O	1467985562	-1	0.929578
5275	COC1=CC=C(C=C1)C2=N[N+](=C(C=C2)N)CCCC(=O)O	1467985562	-1	0.929578
104845	CC(=O)[C@H]1CC[C@@H]2[C@@]1(CC(=O)[C@H]3[C@H]2CC[C@@H]4[C@@]3(CC[C@H](C4)O)C)C	1467985631	-1	2.19512
128618	CCCCOC(=O)C1=NC=C2C(=C1)C3=CC=CC=C3N2	1467985651	-1	0.996459
5282272	CCCCC/C=C\C/C=C\C/C=C\CCCCCCC(=O)NCCO	1467985913	-1	8.47606
5282273	CCCCC/C=C\C/C=C\C/C=C\C/C=C\CCCCCC(=O)NCCO	1467985925	-1	7.57046
4552	C1=CC2=C(C=C1C(F)(F)F)NC(=O)N2C3=C(C=CC(=C3)C(F)(F)F)O	1467985971	-1	5.79624
6103	C1=CC2=C(C=C1Cl)N=C(O2)N	1467986050	-1	4.95178
5282280	CCCCC/C=C\C/C=C\C/C=C\C/C=C\CCCC(=O)OC(CO)CO	1467986186	-1	7.38879
5702286	CC[C@H](C)C(=O)O[C@H]1CCC=C2[C@H]1C([C@H](C=C2)C)CCC3C[C@H](CC(=O)O3)O	1467986937	-1	16
6738	CC1=CC=CC(=C1O)C(=O)O	1467987436	-1	2.18123
10767	CCC(C)(CN(C)C)OC(=O)C1=CC=CC=C1	1467988236	-1	2.33254
10770	CC(CNC1CCCCC1)OC(=O)C2=CC=CC=C2	1467988268	-1	0.883333
4928	CC(C)NC1=NC(=NC(=N1)OC)NC(C)C	1467988421	-1	3.74762
2347	CCCCOC(=O)C1=CC=CC=C1C(=O)OCC2=CC=CC=C2	1467988675	-1	1.94506
5100	C1=CC(=O)C=CC1=C(C2=CC=C(C=C2)O)C3=CC=C(C=C3)O	1467988698	-1	3.30497
3026	CCCCOC(=O)C1=CC=CC=C1C(=O)OCCCC	1467988708	-1	3.03588
4933	CCC(=O)NC1=CC(=C(C=C1)Cl)Cl	1467988875	-1	10.777
5282362	C1=CC=C(C=C1)/C=C/C(=O)C2=CC=C(C=C2)O	1467988909	-1	10.2552
6231	C[C@]12CC[C@H]3[C@H]([C@@H]1CC[C@]2(C#C)O)CCC4=C3CCC(=O)C4	1467989089	-1	7
8569	COC1=CC(=C(C=C1)C(=O)C2=CC=CC=C2O)O	1467989463	-1	2.83665
4632	COC1=CC(=C(C=C1)C(=O)C2=CC=CC=C2)O	1467989482	-1	3.04274
4764	C1=CC=C2C(=C1)C(=O)OC2(C3=CC=C(C=C3)O)C4=CC=C(C=C4)O	1467989493	-1	23.2609
3037	C1=CC(=C(C=C1Cl)CC2=C(C=CC(=C2)Cl)O)O	1467989555	-1	11.1765
4937	CC(C)NC1=NC(=NC(=N1)Cl)NC(C)C	1467989772	-1	4.04141
2730	CCOP(=S)(OCC)OC1=NC(=C(C=C1Cl)Cl)Cl	1467989884	-1	35.1855
3082	CNC(=O)CSP(=S)(OC)OC	1467989928	-1	3.04762
4767	CC(=CC1C(C1(C)C)C(=O)OCC2=CC(=CC=C2)OC3=CC=CC=C3)C	1467990561	-1	7.30125
223368	C[C@]12CC[C@H]3C(=CCC4=C3C=CC(=C4)O)[C@@H]1CCC2=O	1467990617	-1	11.1776
3346	CC1=C(C=CC(=C1)OP(=S)(OC)OC)SC	1467990924	-1	2.25664
3032791	COC(=O)NC(=S)NC1=CC=CC=C1NC(=S)NC(=O)OC	1467991057	-1	6.91172
697993	C1=CC=C2C(=C1)NC(=S)S2	1467991113	-1	1.2399
1674	CC1=C2CCC3=C2C(=CC4=C3C=CC5=CC=CC=C54)C=C1	1467991468	-1	24
16490	C[C@@H]1C[C@H]2[C@@H]3C[C@@H](C4=CC(=O)C=C[C@@]4([C@]3([C@H](C[C@@]2([C@]1(C(=O)CO)O)C)O)F)C)F	1467991570	-1	58.1758
5284557	C[C@]12CCC(=O)C=C1CC[C@@H]3[C@@H]2CC[C@]4([C@H]3CC[C@]4(C#C)O)C	1467991659	-1	24
2728	CC(C)OC(=O)NC1=CC(=CC=C1)Cl	1467991877	-1	15.3439
6710621	CC12CCC3C(C1C[C@H](C2O)O)CCC4=C3C=CC(=C4)OC	1467992813	-1	0
5702051	C[C@]12CCC3C(C1CC[C@@H]2OC(=O)CCC4CCCC4)CCC5=C3C=CC(=C5)O	1467993327	-1	6.94783
247839	C[C@H]1C[C@H]2[C@@H]3CC[C@@H]([C@]3(C[C@@H]([C@@H]2[C@@]4(C1=CC(=O)CC4)C)O)C)C(=O)C	1467993364	-1	30.0875
5702081	C[C@H]1CC2C3CC[C@@H]([C@]3(C[C@@H](C2[C@@]4(C1=CC(=O)CC4)C)O)C)C(=O)C	1467993364	-1	30.0875
247839	C[C@H]1C[C@H]2[C@@H]3CC[C@@H]([C@]3(C[C@@H]([C@@H]2[C@@]4(C1=CC(=O)CC4)C)O)C)C(=O)C	1467993364	-1	30.0875
5702081	C[C@H]1CC2C3CC[C@@H]([C@]3(C[C@@H](C2[C@@]4(C1=CC(=O)CC4)C)O)C)C(=O)C	1467993364	-1	30.0875
31404	CC1=CC(=C(C(=C1)C(C)(C)C)O)C(C)(C)C	1467993917	-1	8.76803
2723	CC1=CC(=CC(=C1Cl)C)O	1467994173	-1	2.66667
6437352	C[C@H]1CCC[C@H](CCC/C=C/C2=CC(=CC(=C2C(=O)O1)O)O)O	1467994535	-1	14.9172
2999413	C[C@H]1CCC[C@@H](CCCCCC2=CC(=CC(=C2C(=O)O1)O)O)O	1467994558	-1	10.3026
108003	C[C@H]1CCCC(=O)CCCCCC2=CC(=CC(=C2C(=O)O1)O)O	1467994581	-1	14.6231
10667	C1=CC=C2C(=C1)C=CC(=O)C2=O	1467994940	-1	14.2083
3003565	CC(=O)O[C@@H]1C[C@]2(C(CCC2=O)C3=C1[C@]4([C@H](OC(=O)C5=COC(=C54)C3=O)COC)C)C	1467998821	-1	3.68015
312145	CC(=O)O[C@@H]1C[C@]2([C@@H](CCC2=O)C3=C1[C@]4([C@H](OC(=O)C5=COC(=C54)C3=O)COC)C)C	1467998821	-1	3.68015
3003565	CC(=O)O[C@@H]1C[C@]2(C(CCC2=O)C3=C1[C@]4([C@H](OC(=O)C5=COC(=C54)C3=O)COC)C)C	1467998821	-1	3.68015
312145	CC(=O)O[C@@H]1C[C@]2([C@@H](CCC2=O)C3=C1[C@]4([C@H](OC(=O)C5=COC(=C54)C3=O)COC)C)C	1467998821	-1	3.68015
3973	C1COCCN1C2=CC(=O)C3=C(O2)C(=CC=C3)C4=CC=CC=C4	1467998967	-1	3.39046
628698	CC(=O)OC1CCC2C1(CCC3C2CCC4=C3C=CC(=C4)O)C	1467999281	-1	6.94783
23874513	C[C@@H]1CC[C@@]2(CC[C@@]3(C(=CC[C@H]4[C@]3(CCC5[C@@]4(C[C@H]([C@@H]([C@@]5(C)CO)O)O)C)C)[C@@H]2[C@H]1C)C)C(=O)O[C@H]6[C@@H]([C@H]([C@@H]([C@H](O6)COC7[C@@H]([C@H]([C@@H]([C@H](O7)CO)OC8[C@@H]([C@@H]([C@H]([C@@H](O8)C)O)O)O)O)O)O)O)O	1468001244	-1	6.59152
5694	CC1=C(C(=CC=C1)NC2=CC(=NC(=N2)SCC(=O)O)Cl)C	1468002980	-1	22.0395
2126	CC1(CCC(C2=C1C=CC(=C2)C(=O)NC3=CC=C(C=C3)C(=O)O)(C)C)C	1468003003	-1	6.69279
644213	C1=CC=C(C=C1)NC(=O)C2=C(C=CC(=C2)[N+](=O)[O-])Cl	1468003077	-1	4.90611
5289501	C/C(=C\C1=CC=C(C=C1)C(=O)O)/C2=CC3=C(C=C2)C(CCC3(C)C)(C)C	1468003158	-1	2.7511
15032	CC(=O)[C@H]1[C@@H](C[C@@H]2[C@@]1(CC[C@H]3[C@H]2CC=C4[C@@]3(CC[C@@H](C4)O)C)C)C#N	1468003197	-1	6.28808
9600409	C1=CC(=CC=C1C2=C(N3C=CSC3=N2)/C=N/OCC4=CC(=C(C=C4)Cl)Cl)Cl	1468003222	-1	0
79437	CN1C2=C(NC1=O)N(C(=O)N(C2=O)C)C	1468009711	-1	1.12397
5497181	CCCCC/C=C\C/C=C\C/C=C\C/C=C\CCCCCC(=O)O	1468011258	-1	17.344
5312557	CC/C=C\C/C=C\C/C=C\CCCCCCCCCCCC(=O)O	1468011337	-1	28.7857
66541	CN1C2=NC(=O)N(C(=O)C2=NC=N1)C	1468013774	1	3.34193
9547215	C[C@]12CC[C@@H](C[C@H]1CC[C@@H]3[C@@H]2CC[C@]4([C@@]3(CC[C@@H]4C5=COC(=O)C=C5)O)C)O	1468015008	1	2
5318997	C[C@H]1[C@@H]([C@H]([C@H]([C@@H](O1)OC2=C(OC3=C(C2=O)C(=CC(=C3CC=C(C)C)O[C@H]4[C@@H]([C@H]([C@@H]([C@H](O4)CO)O)O)O)O)C5=CC=C(C=C5)OC)O)O)O	1468020124	-1	8.20811
64782	C[C@@H]([C@@H](C1=CC=CC=C1)O)N(C)C	1468023343	-1	0.78169
108104	COC1=C2C(=C3C(=C1)C=CC(=O)O3)C=CO2	1468025010	-1	11.2632
68082	COC1=C2C=CC(=O)OC2=C3C=COC3=C1	1468025020	-1	11.4244
3120	CN(C)C(=O)NC1=CC(=C(C=C1)Cl)Cl	1468028121	-1	8.01324
71777	C1=CC(=C(C(=C1)F)C(=O)NC(=O)NC2=CC(=C(C=C2Cl)OC(C(C(F)(F)F)F)(F)F)Cl)F	1468028177	-1	51.9863
5383	CC(C)(C)C1=NN=C(S1)N(C)C(=O)NC	1468028195	-1	0.841757
10788	CN1CN(C(=S)SC1)C	1468028386	-1	16
7204	CC1=C(C=CC(=C1)Cl)OCC(=O)O	1468029035	-1	5.32744
4929	CC(C)NC1=NC(=NC(=N1)SC)NC(C)C	1468029164	-1	3.74762
7153	CC1=C(C=CC(=C1)Cl)OC(C)C(=O)O	1468029768	-1	4.6746
96695	C1=CC=C2C(=C1)N=CC(=N2)C(=O)O	1468029915	-1	0.649485
3289	CCCSP(=O)(OCC)SCCC	1468030491	-1	2.125
3286	CCOP(=S)(OCC)SCSP(=S)(OCC)OCC	1468030839	-1	9.33332
37175	C=CCOC(CN1C=CN=C1)C2=C(C=C(C=C2)Cl)Cl	1468030967	-1	7.99665
12901	COP(=S)(OC)SCN1C(=O)C2=CC=CC=C2C1=O	1468031123	-1	20.0693
4931	CC(C)N(C1=CC=CC=C1)C(=O)CCl	1468031150	-1	26.7812
26033	CCOC(=O)C1=CN2C(=CC(=N2)OP(=S)(OCC)OCC)N=C1C	1468031168	-1	5.83912
15629	CN(C(=O)NC1=CC=C(C=C1)Cl)OC	1468031470	-1	10.1583
5543	CC(C)N(C(C)C)C(=O)SCC(=C(Cl)Cl)Cl	1468031651	-1	14
23466	CC1=CC=CC=C1C(=O)NC2=CC=CC=C2	1468032551	-1	1.7829
6872	C1=CC=C(C=C1)NC(=O)C2=CC=CC=C2O	1468032569	-1	6.3831
911208	C1=C2C(=NC=C1Cl)N=C(N2)C(F)(F)F	1468032615	-1	0.430236
88916	CC1=C(SC(=N1)C)C(=O)NC2=CC=CC=C2	1468032743	-1	4.05558
5614	CC(C)(C)C1=CC(=CC(=C1O)C(C)(C)C)C=C(C#N)C#N	1468033679	1	29
667493	CC1=CC(=O)NC(=S)N1	1468035769	-1	0.74
9553856	C1COCCN1CC2CN(C(=O)O2)/N=C/C3=CC=C(O3)[N+](=O)[O-]	1468035786	-1	25.1803
6093	C1CN(C(=O)N1)C2=NC=C(S2)[N+](=O)[O-]	1468035796	-1	2.06522
62547	C1CC2=CC=CC3=C(C=CC1=C23)N	1468036267	-1	8.52416
9013	CCOC1=CC=C(C=C1)NC(=O)N	1468037177	-1	6.125
1923	C1=CC2=C(C(=C1)O)N=CC=C2	1468037355	-1	3.50476
4641	CCCCC1C(=O)N(N(C1=O)C2=CC=C(C=C2)O)C3=CC=CC=C3	1468037916	-1	9.10269
5327	CC1=CC(=NC(=N1)NS(=O)(=O)C2=CC=C(C=C2)N)C	1468038255	-1	17.5726
6436219	C[C@H]/1CC[C@@H]2C[C@H](C[C@@](O2)([C@@H]3CSC(=O)N3)O)OC(=O)/C=C(\CC/C=C1)/C	1468041264	-1	5.61215
44634701	C[C@@H]1CCC[C@H](/C=C\C(=O)O[C@]23[C@@H](/C=C/C1)[C@@H](C(=C)[C@H]([C@H]2[C@@H](NC3=O)CC4=CC=CC=C4)C)O)O	1468041667	-1	9.19396
6185	C[C@]12CC[C@H]3[C@H]([C@]1(CC[C@@H]2C4=CC(=O)OC4)O)CC[C@]5([C@@]3(CC[C@@H](C5)O)C=O)O	1468041952	1	23.5365
6610243	CC(=C)[C@@H]1[C@@H]([C@@H]2[C@@]3(O2)[C@@H](O1)CC[C@]4([C@]3(CC[C@@H]5[C@@]4(C6=C7[C@H]5OC([C@H]8C[C@H]9[C@@]8(C1=C7C(=CC(=C1CC9=C)Cl)N6)O)(C)C)C)O)C)O	1468042632	-1	1.8891
4060	CCC1(C(=O)N(C(=O)N1)C)C2=CC=CC=C2	1468043011	-1	6.95161
6710699	C[C@]12CCC3C(C1CCC2=O)CCC4=CC(=O)C=C[C@]34C	1468043130	-1	46.0311
64961	C1=CC=C2C(=C1)C3=C(N2)C=NC=C3	1468043229	-1	1.29736
64961	C1=CC=C2C(=C1)C3=C(N2)C=NC=C3	1468043229	1	1.29736
64961	C1=CC=C2C(=C1)C3=C(N2)C=NC=C3	1468043229	-1	1.29736
64961	C1=CC=C2C(=C1)C3=C(N2)C=NC=C3	1468043229	1	1.29736
6857767	C[C@@]12CC[C@H]([C@@](C1CCC(=C)[C@H]2C/C=C/3\[C@@H](COC3=O)O)(C)CO)O	1468043717	-1	15
2125	CC1=C(N(N=C1C(=O)NN2CCCCC2)C3=C(C=C(C=C3)Cl)Cl)C4=CC=C(C=C4)I	1468043773	-1	16
446541	CC1=C(C(=C(C2=C1COC2=O)O)C/C=C(\C)/CCC(=O)O)OC	1468044994	-1	14.7764
3815	C1C2=C3C4=CC=CC=C4NC3=C5C(=C2C(=O)N1)C6=CC=CC=C6N5	1468050425	-1	0.541063
2471	CCCCNC1=C(C(=CC(=C1)C(=O)O)S(=O)(=O)N)OC2=CC=CC=C2	1468051754	-1	9.25
2727	CCCNC(=O)NS(=O)(=O)C1=CC=C(C=C1)Cl	1468051962	-1	8.79167
3168	C1CN(CC=C1N2C3=CC=CC=C3NC2=O)CCCC(=O)C4=CC=C(C=C4)F	1468052254	-1	9.5
3324	CC(=O)OCC(CCN1C=NC2=CN=C(N=C21)N)COC(=O)C	1468052438	-1	16.5
54454	CCC(C)(C)C(=O)O[C@H]1C[C@H](C=C2[C@H]1[C@H]([C@H](C=C2)C)CC[C@@H]3C[C@H](CC(=O)O3)O)C	1468053078	-1	16
2754	C1CCC(CC1)N2C(=NN=N2)CCCCOC3=CC4=C(C=C3)NC(=O)CC4	1468085836	-1	12.2965
32798	CCC(=O)O[C@@]1([C@H](C[C@@H]2[C@@]1(C[C@@H]([C@]3([C@H]2CCC4=CC(=O)C=C[C@@]43C)F)O)C)C)C(=O)CCl	1468085852	-1	65
6713978	CCC(=O)OC1([C@H](C[C@@H]2[C@@]1(C[C@@H]([C@]3([C@H]2CCC4=CC(=O)C=C[C@@]43C)F)O)C)C)C(=O)CCl	1468085852	-1	65
5702274	CCC(=O)O[C@@]1([C@H](CC2[C@@]1(C[C@@H]([C@]3(C2CCC4=CC(=O)C=C[C@@]43C)F)O)C)C)C(=O)CCl	1468085852	-1	65
32798	CCC(=O)O[C@@]1([C@H](C[C@@H]2[C@@]1(C[C@@H]([C@]3([C@H]2CCC4=CC(=O)C=C[C@@]43C)F)O)C)C)C(=O)CCl	1468085852	-1	65
6713978	CCC(=O)OC1([C@H](C[C@@H]2[C@@]1(C[C@@H]([C@]3([C@H]2CCC4=CC(=O)C=C[C@@]43C)F)O)C)C)C(=O)CCl	1468085852	-1	65
5702274	CCC(=O)O[C@@]1([C@H](CC2[C@@]1(C[C@@H]([C@]3(C2CCC4=CC(=O)C=C[C@@]43C)F)O)C)C)C(=O)CCl	1468085852	-1	65
32798	CCC(=O)O[C@@]1([C@H](C[C@@H]2[C@@]1(C[C@@H]([C@]3([C@H]2CCC4=CC(=O)C=C[C@@]43C)F)O)C)C)C(=O)CCl	1468085852	-1	65
6713978	CCC(=O)OC1([C@H](C[C@@H]2[C@@]1(C[C@@H]([C@]3([C@H]2CCC4=CC(=O)C=C[C@@]43C)F)O)C)C)C(=O)CCl	1468085852	-1	65
5702274	CCC(=O)O[C@@]1([C@H](CC2[C@@]1(C[C@@H]([C@]3(C2CCC4=CC(=O)C=C[C@@]43C)F)O)C)C)C(=O)CCl	1468085852	-1	65
444036	CCC(=O)O[C@@]1([C@@H](C[C@@H]2[C@@]1(C[C@@H]([C@]3([C@H]2C[C@@H](C4=CC(=O)C=C[C@@]43C)F)F)O)C)C)C(=O)SCF	1468085868	-1	52.0403
3151	C1CN(CCC1N2C3=C(C=C(C=C3)Cl)NC2=O)CCCN4C5=CC=CC=C5NC4=O	1468085924	-1	6.28571
3474	C1=CC=C(C(=C1)C(=O)OCC(CO)O)NC2=C3C=CC(=CC3=NC=C2)Cl	1468086012	-1	13.6296
5468	CC(C1=CC=C(S1)C(=O)C2=CC=CC=C2)C(=O)O	1468086100	-1	3.43014
78165	C1COCCN1CCS(=O)(=O)O	1468089149	-1	3.38462
1720	C1=CC2=C(C=CC3=C2C(=C1)C(=O)NC3=O)N	1468089317	-1	2.83681
5092	COC1=C(C=C(C=C1)C2CC(=O)NC2)OC3CCCC3	1468089325	-1	2.02888
2094	C1=C2C(=NC=NC2=O)NN1	1468089357	-1	0
15478	C[C@]12CC[C@@H](C[C@H]1CC[C@@H]3[C@@H]2C[C@H]([C@]4([C@@]3(CC[C@@H]4C5=CC(=O)OC5)O)C)O)O	1468090155	1	24
4369270	C[C@]12CC[C@@H](C[C@H]1CC[C@@H]3[C@@H]2CC[C@]4([C@@]3(CC[C@@H]4C5=CC(=O)OC5)O)C)O	1468090243	1	23.5365
7419	C1=CC(=CC(=C1)N)C(=O)O	1468090473	-1	15.6343
4495	CS(=O)(=O)NC1=C(C=C(C=C1)[N+](=O)[O-])OC2=CC=CC=C2	1468091268	-1	30
3365	C1=CC(=C(C=C1F)F)C(CN2C=NC=N2)(CN3C=NC=N3)O	1468092175	-1	7.7037
10367	C1=CC(=NC(=C1)C(=O)O)C(=O)O	1468092486	-1	2.0758
39042	CC(C)(C(=O)O)OC1=CC=C(C=C1)CCNC(=O)C2=CC=C(C=C2)Cl	1468092790	-1	6.71389
6005	CN1CCC2=CC=CC3=C2[C@H]1CC4=C3C(=C(C=C4)O)O	1468093213	-1	32
7389	C1=CC(=CC=C1N)[As](=O)(O)O	1468093780	-1	20.3176
77999	CN(CCOC1=CC=C(C=C1)CC2C(=O)NC(=O)S2)C3=CC=CC=N3	1468094504	-1	19
6714003	CC(=O)[C@]1(CC[C@@H]2[C@@]1(CC[C@H]3[C@H]2C=C(C4=CC(=O)C5CC5[C@]34C)Cl)C)OC(=O)C	1468094989	-1	37.9426
5702030	CC(=O)[C@]1(CCC2[C@@]1(CCC3C2C=C(C4=CC(=O)[C@@H]5C[C@@H]5[C@]34C)Cl)C)OC(=O)C	1468094989	-1	37.9426
6714003	CC(=O)[C@]1(CC[C@@H]2[C@@]1(CC[C@H]3[C@H]2C=C(C4=CC(=O)C5CC5[C@]34C)Cl)C)OC(=O)C	1468094989	-1	37.9426
5702030	CC(=O)[C@]1(CCC2[C@@]1(CCC3C2C=C(C4=CC(=O)[C@@H]5C[C@@H]5[C@]34C)Cl)C)OC(=O)C	1468094989	-1	37.9426
54676537	CC(=O)CC(C1=CC=C(C=C1)[N+](=O)[O-])C2=C(C3=CC=CC=C3OC2=O)O	1468095662	-1	14.1199
37542	C1=NC(=NN1[C@H]2[C@@H]([C@@H]([C@H](O2)CO)O)O)C(=O)N	1468096895	-1	2
441243	CC(C)(C)NC(=O)[C@@H]1C[C@@H]2CCCC[C@@H]2CN1C[C@H]([C@H](CC3=CC=CC=C3)NC(=O)[C@H](CC(=O)N)NC(=O)C4=NC5=CC=CC=C5C=C4)O	1468096991	-1	6.56442
5479	CCS(=O)(=O)CCN1C(=NC=C1[N+](=O)[O-])C	1468097015	-1	13.1111
119607	CC1=C(C(=NO1)C2=CC=CC=C2)C3=CC=C(C=C3)S(=O)(=O)N	1468097055	-1	0
4170	CC1NC2=CC(=C(C=C2C(=O)N1C3=CC=CC=C3C)S(=O)(=O)N)Cl	1468097158	-1	13.1923
5701985	CC(=O)O[C@@H]1CC2[C@](C=CC(=O)C2(C)C)(C3[C@@]1([C@]45[C@H](O4)C(=O)O[C@H]([C@@]5(CC3)C)C6=COC=C6)C)C	1468097382	-1	23.8564
6708818	C1[C@@H]([C@H](OC1N2C=C(C(=O)NC2=O)C(F)(F)F)CO)O	1468098412	-1	3.76984
5312137	CN(C)S(=O)(=O)C1=CC\2=C(C=C1)NC(=O)/C2=C\C3=CC4=C(N3)CCCC4	1468099737	-1	9.18391
1676	CCCN1C2=C(C(=O)NC1=O)NC=N2	1468099953	-1	1.64539
16667736	CC1=C(SC=N1)/C=C\C2=C(N3C(C(C3=O)NC(=O)/C(=N\OC)/C4=CSC(=N4)N)SC2)C(=O)OCOC(=O)C(C)(C)C	1468100771	-1	30.3551
3333	CCOC(=O)C1=C(NC(=C(C1C2=C(C(=CC=C2)Cl)Cl)C(=O)OC)C)C	1468100826	-1	42
3333	CCOC(=O)C1=C(NC(=C(C1C2=C(C(=CC=C2)Cl)Cl)C(=O)OC)C)C	1468100826	1	42
3333	CCOC(=O)C1=C(NC(=C(C1C2=C(C(=CC=C2)Cl)Cl)C(=O)OC)C)C	1468100826	-1	42
3333	CCOC(=O)C1=C(NC(=C(C1C2=C(C(=CC=C2)Cl)Cl)C(=O)OC)C)C	1468100826	1	42
2170	C1CN(CCN1)C2=NC3=CC=CC=C3OC4=C2C=C(C=C4)Cl	1468103788	-1	10
2249	CC(C)NCC(COC1=CC=C(C=C1)CC(=O)N)O	1468104051	-1	0
175540	CC(C)NC[C@@H](COC1=CC=C(C=C1)CC(=O)N)O	1468104051	-1	0
180559	CC(C)NC[C@H](COC1=CC=C(C=C1)CC(=O)N)O	1468104051	-1	0
2249	CC(C)NCC(COC1=CC=C(C=C1)CC(=O)N)O	1468104051	-1	0
175540	CC(C)NC[C@@H](COC1=CC=C(C=C1)CC(=O)N)O	1468104051	-1	0
180559	CC(C)NC[C@H](COC1=CC=C(C=C1)CC(=O)N)O	1468104051	-1	0
2249	CC(C)NCC(COC1=CC=C(C=C1)CC(=O)N)O	1468104051	-1	0
175540	CC(C)NC[C@@H](COC1=CC=C(C=C1)CC(=O)N)O	1468104051	-1	0
180559	CC(C)NC[C@H](COC1=CC=C(C=C1)CC(=O)N)O	1468104051	-1	0
2284	C1=CC(=CC=C1C(CC(=O)O)CN)Cl	1468104243	-1	6.51163
2333	CCC1=C(C2=CC=CC=C2O1)C(=O)C3=CC(=C(C(=C3)Br)O)Br	1468104395	-1	24
2333	CCC1=C(C2=CC=CC=C2O1)C(=O)C3=CC(=C(C(=C3)Br)O)Br	1468104395	1	24
2333	CCC1=C(C2=CC=CC=C2O1)C(=O)C3=CC(=C(C(=C3)Br)O)Br	1468104395	-1	24
2333	CCC1=C(C2=CC=CC=C2O1)C(=O)C3=CC(=C(C(=C3)Br)O)Br	1468104395	1	24
5281004	CCCC1O[C@@H]2C[C@H]3[C@@H]4CCC5=CC(=O)C=C[C@@]5([C@H]4[C@H](C[C@@]3([C@@]2(O1)C(=O)CO)C)O)C	1468104785	-1	62
44093	C[C@H](CS)C(=O)N1CCC[C@H]1C(=O)O	1468105065	-1	13
2717	CN1C(S(=O)(=O)CCC1=O)C2=CC=C(C=C2)Cl	1468105545	-1	4.26852
2732	C1=CC=C2C(=C1)C(=O)NC2(C3=CC(=C(C=C3)Cl)S(=O)(=O)N)O	1468105633	-1	7
2803	C1CN=C(N1)NC2=C(C=CC=C2Cl)Cl	1468105833	-1	6
969516	COC1=C(C=CC(=C1)/C=C/C(=O)CC(=O)/C=C/C2=CC(=C(C=C2)O)OC)O	1468106094	-1	51.352
969516	COC1=C(C=CC(=C1)/C=C/C(=O)CC(=O)/C=C/C2=CC(=C(C=C2)O)OC)O	1468106094	1	51.352
969516	COC1=C(C=CC(=C1)/C=C/C(=O)CC(=O)/C=C/C2=CC(=C(C=C2)O)OC)O	1468106094	-1	51.352
969516	COC1=C(C=CC(=C1)/C=C/C(=O)CC(=O)/C=C/C2=CC(=C(C=C2)O)OC)O	1468106094	1	51.352
5702160	C1=C(N=C(S1)N=C(N)N)CSCC/C(=N/S(=O)(=O)N)/N	1468107386	-1	9.23188
5353622	C1=C(N=C(S1)N=C(N)N)CSCC/C(=N\S(=O)(=O)N)/N	1468107386	-1	9.23188
5702160	C1=C(N=C(S1)N=C(N)N)CSCC/C(=N/S(=O)(=O)N)/N	1468107386	-1	9.23188
5353622	C1=C(N=C(S1)N=C(N)N)CSCC/C(=N\S(=O)(=O)N)/N	1468107386	-1	9.23188
57363	C[C@]12CC[C@H]3[C@H]([C@@H]1CC[C@@H]2C(=O)NC(C)(C)C)CC[C@@H]4[C@@]3(C=CC(=O)N4)C	1468107520	-1	13.6507
3478	CC1=NC=C(N=C1)C(=O)NCCC2=CC=C(C=C2)S(=O)(=O)NC(=O)NC3CCCCC3	1468107896	-1	5.975
3702	CC1CC2=CC=CC=C2N1NC(=O)C3=CC(=C(C=C3)Cl)S(=O)(=O)N	1468108726	-1	13
3793	CCC(C)N1C(=O)N(C=N1)C2=CC=C(C=C2)N3CCN(CC3)C4=CC=C(C=C4)OCC5COC(O5)(CN6C=NC=N6)C7=C(C=C(C=C7)Cl)Cl	1468109014	-1	30
3793	CCC(C)N1C(=O)N(C=N1)C2=CC=C(C=C2)N3CCN(CC3)C4=CC=C(C=C4)OCC5COC(O5)(CN6C=NC=N6)C7=C(C=C(C=C7)Cl)Cl	1468109014	1	30
3793	CCC(C)N1C(=O)N(C=N1)C2=CC=C(C=C2)N3CCN(CC3)C4=CC=C(C=C4)OCC5COC(O5)(CN6C=NC=N6)C7=C(C=C(C=C7)Cl)Cl	1468109014	-1	30
3793	CCC(C)N1C(=O)N(C=N1)C2=CC=C(C=C2)N3CCN(CC3)C4=CC=C(C=C4)OCC5COC(O5)(CN6C=NC=N6)C7=C(C=C(C=C7)Cl)Cl	1468109014	1	30
3878	C1=CC(=C(C(=C1)Cl)Cl)C2=C(N=C(N=N2)N)N	1468109238	-1	22.4295
3883	CC1=C(C=CN=C1CS(=O)C2=NC3=CC=CC=C3N2)OCC(F)(F)F	1468109254	-1	25
4030	COC(=O)NC1=NC2=C(N1)C=C(C=C2)C(=O)C3=CC=CC=C3	1468109766	1	24
4030	COC(=O)NC1=NC2=C(N1)C=C(C=C2)C(=O)C3=CC=CC=C3	1468109766	-1	24
4030	COC(=O)NC1=NC2=C(N1)C=C(C=C2)C(=O)C3=CC=CC=C3	1468109766	1	24
4030	COC(=O)NC1=NC2=C(N1)C=C(C=C2)C(=O)C3=CC=CC=C3	1468109766	-1	24
6741	C[C@H]1C[C@H]2[C@@H]3CC[C@@]([C@]3(C[C@@H]([C@@H]2[C@@]4(C1=CC(=O)C=C4)C)O)C)(C(=O)CO)O	1468110142	-1	39.8837
5702085	C[C@H]1CC2C3CC[C@@]([C@]3(C[C@@H](C2[C@@]4(C1=CC(=O)C=C4)C)O)C)(C(=O)CO)O	1468110142	-1	39.8837
6741	C[C@H]1C[C@H]2[C@@H]3CC[C@@]([C@]3(C[C@@H]([C@@H]2[C@@]4(C1=CC(=O)C=C4)C)O)C)(C(=O)CO)O	1468110142	-1	39.8837
5702085	C[C@H]1CC2C3CC[C@@]([C@]3(C[C@@H](C2[C@@]4(C1=CC(=O)C=C4)C)O)C)(C(=O)CO)O	1468110142	-1	39.8837
4409	CC(=O)CCC1=CC2=C(C=C1)C=C(C=C2)OC	1468110437	-1	6.49231
5775	CC1=CC=C(C=C1)N(CC2=NCCN2)C3=CC(=CC=C3)O	1468111516	-1	7.3698
6714009	CCOC(=O)[C@H](CCC1=CC=CC=C1)N[C@@H](C)C(=O)N2[C@H]3CCC[C@H]3CC2C(=O)O	1468112493	-1	5.35239
657345	CN/C(=C/[N+](=O)[O-])/NCCSCC1=CC=C(O1)CN(C)C	1468112501	-1	12.5053
5073	CC1=C(C(=O)N2CCCCC2=N1)CCN3CCC(CC3)C4=NOC5=C4C=CC(=C5)F	1468112549	-1	7
5265	C1CN(CCC12C(=O)NCN2C3=CC=CC=C3)CCCC(=O)C4=CC=C(C=C4)F	1468113141	-1	9.85294
5503	CC1=CC=C(C=C1)S(=O)(=O)NC(=O)NN2CCCCCC2	1468113885	-1	10
5510	CC1=CC(=CC=C1)N(C)C(=S)OC2=CC3=CC=CC=C3C=C2	1468113901	-1	12.3566
41781	CC1=CC(=CC=C1)NC2=C(C=NC=C2)S(=O)(=O)NC(=O)NC(C)C	1468113941	-1	11.2882
31307	C[C@]12C[C@@H]([C@]3([C@H]([C@@H]1C[C@H]([C@@]2(C(=O)CO)O)O)CCC4=CC(=O)C=C[C@@]43C)F)O	1468114005	-1	60
5584	CC(CN1C2=CC=CC=C2CCC3=CC=CC=C31)CN(C)C	1468114149	-1	12.7724
5591	CC1=C(C(=C2CCC(OC2=C1C)(C)COC3=CC=C(C=C3)CC4C(=O)NC(=O)S4)C)O	1468114187	-1	20
60846	CCCCC(=O)N(CC1=CC=C(C=C1)C2=CC=CC=C2C3=NNN=N3)[C@@H](C(C)C)C(=O)O	1468114307	-1	5.91651
44634695	C[C@H]1C/C(=C/C=C\[C@@H]([C@H](OC(=O)/C(=C\C(=C\[C@H]([C@H]1O)C)\C)/OC)[C@@H](C)[C@H]([C@H](C)[C@]2(C[C@H]([C@@H]([C@H](O2)C(C)C)C)O)O)O)OC)/C	1468119280	1	28.9504
69301	COC1=CC(=CC(=C1)OC)OC	1468132153	-1	0.731343
71771	C1=CC=C(C(=C1)CC(=O)OCC(=O)O)NC2=C(C=CC=C2Cl)Cl	1468132415	-1	17.7637
1981	CC1=C(C2=C(N1C(=O)C3=CC=C(C=C3)Cl)C=CC(=C2)OC)CC(=O)OCC(=O)O	1468132423	-1	16.115
6713977	CCC(=O)OCC(=O)C1([C@@H](C[C@@H]2[C@@]1(C[C@@H]([C@H]3[C@H]2[C@@H](CC4=CC(=O)C=C[C@]34C)Cl)O)C)C)OC(=O)CC	1468132495	-1	47.3809
16667717	CCC(=O)OCC(=O)[C@]1([C@@H](CC2[C@@]1(C[C@@H](C3C2[C@@H](CC4=CC(=O)C=C[C@]34C)Cl)O)C)C)OC(=O)CC	1468132495	-1	47.3809
6713977	CCC(=O)OCC(=O)C1([C@@H](C[C@@H]2[C@@]1(C[C@@H]([C@H]3[C@H]2[C@@H](CC4=CC(=O)C=C[C@]34C)Cl)O)C)C)OC(=O)CC	1468132495	-1	47.3809
16667717	CCC(=O)OCC(=O)[C@]1([C@@H](CC2[C@@]1(C[C@@H](C3C2[C@@H](CC4=CC(=O)C=C[C@]34C)Cl)O)C)C)OC(=O)CC	1468132495	-1	47.3809
443958	CC(=O)OCC(=O)[C@@]12[C@@H](C[C@@H]3[C@@]1(C[C@@H]([C@]4([C@H]3CCC5=CC(=O)C=C[C@@]54C)F)O)C)OC6(O2)CCCC6	1468132543	-1	63
5702266	CC(=O)OCC(=O)[C@@]12[C@@H](CC3[C@@]1(C[C@@H]([C@]4(C3CCC5=CC(=O)C=C[C@@]54C)F)O)C)OC6(O2)CCCC6	1468132543	-1	63
443958	CC(=O)OCC(=O)[C@@]12[C@@H](C[C@@H]3[C@@]1(C[C@@H]([C@]4([C@H]3CCC5=CC(=O)C=C[C@@]54C)F)O)C)OC6(O2)CCCC6	1468132543	-1	63
5702266	CC(=O)OCC(=O)[C@@]12[C@@H](CC3[C@@]1(C[C@@H]([C@]4(C3CCC5=CC(=O)C=C[C@@]54C)F)O)C)OC6(O2)CCCC6	1468132543	-1	63
6708733	CCC(=O)OCC(=O)[C@]1([C@H](CC2[C@@]1(C[C@@H](C3(C2CCC4=CC(=O)C=C[C@@]43C)F)O)C)C)OC(=O)CC	1468132727	-1	65
6710678	CCCCC(=O)O[C@@]1([C@H](CC2[C@@]1(CC([C@]3(C2CCC4=CC(=O)C=C[C@@]43C)F)O)C)C)C(=O)CO	1468132735	-1	65
2466	CCCCOC1=CC=C(C=C1)CC(=O)NO	1468132815	-1	9
1547484	C1CN(CCN1C/C=C/C2=CC=CC=C2)C(C3=CC=CC=C3)C4=CC=CC=C4	1468133015	-1	3
688020	CCN(C1=CC=CC=C1C)C(=O)/C=C/C	1468133047	-1	7.75699
71414	C[C@H]1C[C@H]2[C@@H]3C[C@@H](C4=CC(=O)C=C[C@@]4([C@]3([C@H](C[C@@]2([C@]1(C(=O)COC(=O)C)OC(=O)C)C)O)F)C)F	1468133182	-1	61.5022
9051	CC(=O)[C@H]1CC[C@@H]2[C@@]1(CC[C@@H]3[C@H]2C=CC4=CC(=O)CC[C@@]34C)C	1468133261	-1	27.7288
3332	C1=CC=C(C=C1)C2=CC=C(C=C2)CC(=O)O	1468133381	-1	1.7707
3335	C1=CC=C(C=C1)C2=CC=C(C=C2)C(=O)CCC(=O)O	1468133389	-1	1.68627
443980	C[C@@H]1C[C@H]2[C@@H]3C[C@@H](C4=CC(=O)C=C[C@@]4([C@]3([C@H](C[C@@]2([C@]1(C(=O)COC(=O)C(C)(C)C)O)C)O)F)C)F	1468133429	-1	59.6098
6215	C[C@]12C[C@@H]([C@]3([C@H]([C@@H]1C[C@@H]4[C@]2(OC(O4)(C)C)C(=O)CO)C[C@@H](C5=CC(=O)C=C[C@@]53C)F)F)O	1468133437	-1	56.7713
9878	C[C@H]1C[C@H]2[C@@H]3CC[C@@]([C@]3(C[C@@H]([C@@]2([C@@]4(C1=CC(=O)C=C4)C)F)O)C)(C(=O)C)O	1468133445	-1	50.2099
5702058	C[C@H]1CC2C3CC[C@@]([C@]3(C[C@@H]([C@@]2(C4(C1=CC(=O)C=C4)C)F)O)C)(C(=O)C)O	1468133445	-1	50.2099
9878	C[C@H]1C[C@H]2[C@@H]3CC[C@@]([C@]3(C[C@@H]([C@@]2([C@@]4(C1=CC(=O)C=C4)C)F)O)C)(C(=O)C)O	1468133445	-1	50.2099
5702058	C[C@H]1CC2C3CC[C@@]([C@]3(C[C@@H]([C@@]2(C4(C1=CC(=O)C=C4)C)F)O)C)(C(=O)C)O	1468133445	-1	50.2099
3475	CC1=CC=C(C=C1)S(=O)(=O)NC(=O)NN2CC3CCCC3C2	1468133509	-1	9.86842
3747	CC(C)OC1=CC2=C(C=C1)C(=O)C(=CO2)C3=CC=CC=C3	1468133645	-1	1.75814
4747	C1CN(CCC1O)CCCN2C3=CC=CC=C3SC4=C2C=C(C=C4)C#N	1468134136	-1	9.09282
4922	CCCN(CCC)C(=O)C(CCC(=O)O)NC(=O)C1=CC=CC=C1	1468134316	-1	3.54878
5147	C1=CC=C(C(=C1)C(=O)N)O	1468134444	-1	1.29401
5323	COC1=NC(=NC(=C1)NS(=O)(=O)C2=CC=C(C=C2)N)OC	1468134580	-1	6.83265
688272	CCN1CCC[C@H]1CNC(=O)C2=C(C=CC(=C2)S(=O)(=O)N)OC	1468134596	-1	0
5355	CCN1CCCC1CNC(=O)C2=C(C=CC(=C2)S(=O)(=O)N)OC	1468134596	-1	0
688272	CCN1CCC[C@H]1CNC(=O)C2=C(C=CC(=C2)S(=O)(=O)N)OC	1468134596	-1	0
5355	CCN1CCCC1CNC(=O)C2=C(C=CC(=C2)S(=O)(=O)N)OC	1468134596	-1	0
5362	CCCCC1(C(=O)N(N(C1=O)C2=CC=CC=C2)C3=CC=CC=C3)COC(=O)CCC(=O)O	1468134612	-1	10.9848
610479	CC1=C(C=CC=C1Cl)NC2=CC=CC=C2C(=O)O	1468134820	-1	12.76
5735	CN1CCN(CC1)C(=O)OC2C3=NC=CN=C3C(=O)N2C4=NC=C(C=C4)Cl	1468134979	-1	14.9379
5901	C1=NN(C(=O)NC1=O)[C@H]2[C@@H]([C@@H]([C@H](O2)CO)O)O	1468145525	-1	3.32924
2366	CNCCC1=CC=CC=N1	1468145557	-1	1.09274
71188	CCN1CCN(CC1)C2=C(C=C3C(=C2)N(C=C(C3=O)C(=O)O)C4CC4)F	1468145685	-1	12.672
40854	COC(=O)NC1=NC2=C(N1)C=C(C=C2)S(=O)C3=CC=CC=C3	1468145858	-1	19.3678
60773	CC(C)[C@@H](C(=O)OCCOCN1C=NC2=C1NC(=NC2=O)N)N	1468145961	-1	19.1852
5733	CC1=C(N(C(=C1)CC(=O)O)C)C(=O)C2=CC=C(C=C2)Cl	1468145977	-1	3.82976
57469	CC(C)CN1C=NC2=C1C3=CC=CC=C3N=C2N	1468149015	-1	3.68558
5284550	CN(C)CC/C=C/1\C2=CC=CC=C2CSC3=CC=CC=C31	1468149325	-1	3.55882
60606	COC(=O)[C@H](C1=CC=CC=C1Cl)N2CCC3=C(C2)C=CS3	1468152888	-1	6.17308
6604931	CC(C)[C@H](CO)NC1=NC2=C(C(=N1)NC3=CC(=CC(=C3)N)Cl)N=CN2C(C)C	1468156817	-1	5.68421
34359	C[C@](CC1=CC(=C(C=C1)O)O)(C(=O)O)NN	1468159463	-1	27.1916
657237	C1=NC2=C(N1[C@H]3[C@H]([C@@H]([C@H](O3)CO)O)O)N=C(N=C2N)F	1468159566	-1	41.8793
1830	C1=C(C2=C(N1C3C(C(C(O3)CO)O)O)N=CN=C2N)I	1468159826	1	19.9778
4369359	C1CN2C(=NN=C2C(F)(F)F)CN1C(=O)C[C@@H](CC3=CC(=C(C=C3F)F)F)N	1468159850	-1	19.5704
3540	CNCCNS(=O)(=O)C1=CC=CC2=C1C=CN=C2	1468161537	-1	1.19593
6603989	CC[C@@H](CO)NC1=NC2=C(C(=N1)NCC3=CC=CC=C3)N=CN2C(C)C	1468162615	-1	6
160355	CC[C@H](CO)NC1=NC2=C(C(=N1)NCC3=CC=CC=C3)N=CN2C(C)C	1468162615	-1	6
6603989	CC[C@@H](CO)NC1=NC2=C(C(=N1)NCC3=CC=CC=C3)N=CN2C(C)C	1468162615	-1	6
160355	CC[C@H](CO)NC1=NC2=C(C(=N1)NCC3=CC=CC=C3)N=CN2C(C)C	1468162615	-1	6
110634	CCCC1=NC(=C2N1NC(=NC2=O)C3=C(C=CC(=C3)S(=O)(=O)N4CCN(CC4)CC)OCC)C	1468163179	-1	3.37805
5723	COC1=C(C=CC(=C1)C2=NNC(=O)C=C2)OC(F)F	1468163275	-1	0
449241	C1=CC2=C(C=CN=C2)C(=C1)S(=O)(=O)NCCNC/C=C/C3=CC=C(C=C3)Br	1468164873	-1	5.16782
6364669	C[C@H]1CCC/C=C/C2C[C@@H](CC2[C@@H](/C=C/C(=O)O1)O)O	1468166431	1	18.3252
6364669	C[C@H]1CCC/C=C/C2C[C@@H](CC2[C@@H](/C=C/C(=O)O1)O)O	1468166431	-1	18.3252
44634702	C[C@H]1CCC/C=C/C2C[C@@H](C[C@H]2[C@@H](/C=C\C(=O)O1)O)O	1468166431	1	18.3252
6364669	C[C@H]1CCC/C=C/C2C[C@@H](CC2[C@@H](/C=C/C(=O)O1)O)O	1468166431	1	18.3252
6364669	C[C@H]1CCC/C=C/C2C[C@@H](CC2[C@@H](/C=C/C(=O)O1)O)O	1468166431	-1	18.3252
44634702	C[C@H]1CCC/C=C/C2C[C@@H](C[C@H]2[C@@H](/C=C\C(=O)O1)O)O	1468166431	1	18.3252
6364669	C[C@H]1CCC/C=C/C2C[C@@H](CC2[C@@H](/C=C/C(=O)O1)O)O	1468166431	1	18.3252
6364669	C[C@H]1CCC/C=C/C2C[C@@H](CC2[C@@H](/C=C/C(=O)O1)O)O	1468166431	-1	18.3252
44634702	C[C@H]1CCC/C=C/C2C[C@@H](C[C@H]2[C@@H](/C=C\C(=O)O1)O)O	1468166431	1	18.3252
6710700	C1=CC(=CC=C1[C@@H]2[C@H](C(=O)N2C3=CC=C(C=C3)F)CCC(C4=CC=C(C=C4)F)O)O	1468169853	-1	20.3508
5702210	CCCC(=O)NC1=NC=NC2=C1N=CN2C3[C@@H]([C@H]4[C@H](O3)COP(=O)(O4)O)OC(=O)CCC	1468172078	-1	24.9976
9687	CCCC(=O)NC1=NC=NC2=C1N=CN2[C@H]3[C@@H]([C@H]4[C@H](O3)COP(=O)(O4)O)OC(=O)CCC	1468172078	-1	24.9976
5702210	CCCC(=O)NC1=NC=NC2=C1N=CN2C3[C@@H]([C@H]4[C@H](O3)COP(=O)(O4)O)OC(=O)CCC	1468172078	-1	24.9976
9687	CCCC(=O)NC1=NC=NC2=C1N=CN2[C@H]3[C@@H]([C@H]4[C@H](O3)COP(=O)(O4)O)OC(=O)CCC	1468172078	-1	24.9976
656615	C[C@]12CCC(=O)C=C1C=C[C@@H]3[C@@H]2CC[C@]4([C@H]3CC[C@]4(CCC(=O)O)O)C	1468172364	-1	21.1121
195915	C[C@]12CCC(=O)C=C1C=CC3C2CC[C@]4(C3CC[C@]4(CCC(=O)O)O)C	1468172364	-1	21.1121
656615	C[C@]12CCC(=O)C=C1C=C[C@@H]3[C@@H]2CC[C@]4([C@H]3CC[C@]4(CCC(=O)O)O)C	1468172364	-1	21.1121
195915	C[C@]12CCC(=O)C=C1C=CC3C2CC[C@]4(C3CC[C@]4(CCC(=O)O)O)C	1468172364	-1	21.1121
3071	C1=CC=C2C(=C1)C(=CN2)CC3=CNC4=CC=CC=C43	1468172484	-1	2.45981
51081	CCN1C=C(C(=O)C2=CC(=C(C=C21)N3CCN(CC3)C)F)C(=O)O	1468172547	-1	13.009
27400	CN1CCC(=C2C3=C(CCC4=CC=CC=C42)SC=C3)CC1	1468172627	-1	1
5282494	CCCCC(=O)O[C@@]1(CC[C@@H]2[C@@]1(C[C@@H]([C@H]3[C@H]2CCC4=CC(=O)CC[C@]34C)O)C)C(=O)CO	1468175092	-1	33.904
2763	CC(C)(C(=O)O)OC1=CC=C(C=C1)C2CC2(Cl)Cl	1468175108	-1	2.51304
4167	CN1CCCC(C1)CC2C3=CC=CC=C3SC4=CC=CC=C24	1468175503	-1	0
4199	CC1=CC(=NN=C1NCCN2CCOCC2)C3=CC=CC=C3	1468175575	-1	2.83052
4184	CN1CCN2C(C1)C3=CC=CC=C3CC4=CC=CC=C42	1468175977	-1	2.70204
2092	CN(CCCNC(=O)C1CCCO1)C2=NC3=CC(=C(C=C3C(=N2)N)OC)OC	1468175999	-1	16.1014
[truncated: 195 more rows]

[truncated: 3 more sheets: S2.10, S2.11, S2.12]
