# Supplementary material for: NICEdrug.ch, a workflow for rational drug design and systems-level analysis of drug metabolism
Source: eLife. 2021 Aug 3;10:e65543. doi: 10.7554/eLife.65543 (PMC8331181; doi:10.7554/eLife.65543)
Supplement: Supplementary file 3. — (1) List of compounds in the 5-FU metabolic neighborhood including up to four reactions or steps away. (2) Description of reactions in the 5-FU metabolic neighborhood including up to four reactions or steps away. [file elife-65543-supp3.xlsx]

## Sheet: summary
Tab in Supplementary_File_3	Description of each tab/section in Supplementary_File_3, related to Figure 2, 3, and 4
S3.1	List of compounds in the 5-FU metabolic neighborhood including up to four reactions or steps away
S3.2	Description of reactions in the 5-FU metabolic neighborhood including up to four reactions or steps away
Note 1: "similarity" (defined in the heading of the tables S2.1 and S2.2) refers to the reactive site-centric similarity as defined in the NICEdrug score. Here, we screened for "similar" compounds by looking for compounds sharing reactive site (alpha parameter of NICEdrug score = 1) and evaluating the structural similarity of the reactive site neighborhood up to seven atoms away (beta parameter o…
Note 2: "anti-metabolites" are those small molecules that show a slightly different reactive site but share reactive site neighborhood with a native human substrate, and hence they might still be able to bind to an enzyme and compete with the native substrate
Note 3: "para-metabolites" are those small molecules that share a reactive site with native human metabolites and differ in the reactive site neighborhood

## Sheet: S3.1
Molecule NICEdrug ID	Molecule name	Link for molecular structure visualization in NICEdrug.ch	Molecule exists in biological databases? (1=yes, 0=no)	Number of reactions or steps away from 5-FU	ID of human metabolite similar to reference molecule (column 1 or A) (N=not found)	BNICE.ch reaction rule of inhibited human enzyme (N=not found)	Human reaction NICEdrug ID inhibited (1=not found)	NICEdrug score between reference molecule (column 1 or A) and similar human metabolite (column 6 or F) (0.0001=not calculated)	Is the reference molecule (column 1 or A) an anti-metabolite of the similar human metabolite (column 6 or F)? (1=yes, 0=no)	Is the reference molecule (column 1 or A) a para-metabolite of the similar human metabolite (column 6 or F)? (1=yes, 0=no)	Number of shared reactive sites between reference molecule (column 1 or A) and similar human metabolite (column 6 or F)	Ratio of shared reactive sites between reference molecule (column 1 or A) and similar human metabolite (column 6 or F)	NICEdrug ID of hepathotoxic molecule most similar to reference molecule (column 1 or A)	NICEdrug toxic alerts shared between reference molecule (column 1 or A) and most similar hepathotoxic molecule (column 14 or N)	NICEdrug score between reference molecule (column 1 or A) and most similar hepathotoxic molecule (column 14 or N)	NICEdrug ID of supertoxic molecule most similar to reference molecule (column 1 or A)	NICEdrug toxic alerts shared between reference molecule (column 1 or A) and most similar supertoxic molecule (column 17 or Q)	NICEdrug score between reference molecule (column 1 or A) and most similar supertoxic molecule (column 17 or Q)	Toxicity score for reference molecule (column 1 or A); calculated as defined in equation 1 of STAR Methods	In which main Figure of the manuscript does the reference molecule (column 1 or A) appear?
1467928724	5-FU	LINK	1	1	xan	1.1.1D1(rev)	1886	0.394	0	0	1	33
1467872897	r1p	LINK	1	1	N	N	1	0.0001	0	0	0	0	1467871323		0.249	1467869376	Reactive, unstable, toxic: 3|S/PO3 groups: 4|UNIFAC: 3|alkyl esters of S or P: 1|LD50_mo_oral: 1|Phosphoric ester: 1|Skin sensitization: 1|Biodegradable compounds: 3|phosphor: 1|Nonbiodegradable compo
1467871323	cytd	LINK	1	1	N	N	1	0.0001	0	0	0	0	1467871323		1	33918	Genotoxic carcinogenicity, mutagenicity: 3|Biodegradable compounds: 3|Nonbiodegradable compounds: 1|Filter82_pyridinium: 1|aniline: 1|UNIFAC: 3|Skin sensitization: 2
1467871955	DU	LINK	1	1	N	N	1	0.0001	0	0	0	0	1467868402		0.906	2382083	Biodegradable compounds: 2|Filter82_pyridinium: 1|Nonbiodegradable compounds: 1|UNIFAC: 2
1467867842	5mta	LINK	1	1	N	N	1	0.0001	0	0	0	0	1467868376	Skin sensitization: 2|Genotoxic carcinogenicity, mutagenicity: 1	0.793	1467934635	Chelating agents: 1|Genotoxic carcinogenicity, mutagenicity: 2|UNIFAC: 3|Nonbiodegradable compounds: 1|aniline: 1
1467883352	XANT	LINK	1	1	N	N	1	0.0001	0	0	0	0	1467868376		0.745	1467934647	Nonbiodegradable compounds: 1|UNIFAC: 3|Biodegradable compounds: 3
1467895544	3DMET: B00580	LINK	1	1	N	N	1	0.0001	0	0	0	0	1467926212		0.117	4673623	UNIFAC: 1|Aliphatic long chain: 1
1926717	5-fluoro-1-methylpyrimidine-2,4-dione	LINK	0	1	N	N	1	0.0001	0	0	0	0		Nonbiodegradable compounds: 1|Acute Aquatic Toxicity: 1			Filter82_pyridinium: 1
690722	5-fluoro-2,4-dioxo-1H-pyrimidine-6-carboxylic acid	LINK	0	1	N	N	1	0.0001	0	0	0	0		Acute Aquatic Toxicity: 1|Nonbiodegradable compounds: 1			Idiosyncratic toxicity (RM formation): 1|Biodegradable compounds: 1|UNIFAC: 2
3561969	2,4-dioxo-1H-pyrimidine-6-carboxamide	LINK	0	1	N	N	1	0.0001	0	0	0	0					UNIFAC: 1
1966680	N-(hydroxymethyl)formamide	LINK	0	1	N	N	1	0.0001	0	0	0	0					Skin sensitization: 1|UNIFAC: 2|Filter38_aldehyde: 1|het-C-het not in ring: 1|Biodegradable compounds: 1|Non-genotoxic carcinogenicity: 1|formate_formide: 1|Idiosyncratic toxicity (RM formation): 1|Re
38310	5-fluoro-6-hydroxy-1,3-diazinane-2,4-dione	LINK	0	1	N	N	1	0.0001	0	0	0	0					Acute Aquatic Toxicity: 3|Idiosyncratic toxicity (RM formation): 1|Potential electrophilic agents: 1|Reactive, unstable, toxic: 2|Biodegradable compounds: 1|UNIFAC: 2|alpha halo carbonyl: 1|Skin sensi
734874	2-amino-5-fluoro-1H-pyrimidin-6-one	LINK	0	1	N	N	1	0.0001	0	0	0	0		Acute Aquatic Toxicity: 1|Nonbiodegradable compounds: 1			aniline: 1|Skin sensitization: 2|Genotoxic carcinogenicity, mutagenicity: 3
2152578	5-fluoro-1H-pyrimidin-6-one	LINK	0	1	N	N	1	0.0001	0	0	0	0		Acute Aquatic Toxicity: 1|Nonbiodegradable compounds: 1
2377683	(2S,3S,4S,5R,6R)-6-(5-fluoro-2,4-dioxo-1-pyrimidinyl)-3,4,5-trihydroxy-2-oxanecarboxylic acid	LINK	0	1	N	N	1	0.0001	0	0	0	0		Nonbiodegradable compounds: 1|Acute Aquatic Toxicity: 1			Nonbiodegradable compounds: 1|Biodegradable compounds: 4|UNIFAC: 5|Reactive, unstable, toxic: 1|Filter82_pyridinium: 1|Idiosyncratic toxicity (RM formation): 1
3739482	2-(ethylthio)-5-fluoro-1H-pyrimidin-6-one	LINK	0	1	N	N	1	0.0001	0	0	0	0		Acute Aquatic Toxicity: 1|Nonbiodegradable compounds: 1		1468107584	UNIFAC: 1
4316900	5-fluoro-1-[3,4,5-trihydroxy-6-(hydroxymethyl)-2-oxanyl]pyrimidine-2,4-dione	LINK	0	1	N	N	1	0.0001	0	0	0	0		Nonbiodegradable compounds: 1|Acute Aquatic Toxicity: 1			UNIFAC: 4|Filter82_pyridinium: 1|Nonbiodegradable compounds: 1|Biodegradable compounds: 4
4371825	5-fluoro-3-methyl-1H-pyrimidine-2,4-dione	LINK	0	1	N	N	1	0.0001	0	0	0	0		Acute Aquatic Toxicity: 1|Nonbiodegradable compounds: 1			Filter82_pyridinium: 1
31820103	4-amino-5-fluoro-3,4-dihydro-1H-pyrimidin-2-one	LINK	0	1	N	N	1	0.0001	0	0	0	0					Reactive, unstable, toxic: 1|Skin sensitization: 1|UNIFAC: 5
340651086	5-fluoro-2-hydroxy-2,3-dihydro-1H-pyrimidin-4-one	LINK	0	1	N	N	1	0.0001	0	0	0	0					alpha halo carbonyl: 1|Acute Aquatic Toxicity: 3|Reactive, unstable, toxic: 3|Skin sensitization: 1|Biodegradable compounds: 1|UNIFAC: 5
347048629	N-[(2R,3R,4R,5R,6R)-2-(5-fluoro-2,4-dioxo-1-pyrimidinyl)-4,5-dihydroxy-6-(hydroxymethyl)-3-oxanyl]acetamide	LINK	0	1	N	N	1	0.0001	0	0	0	0		Nonbiodegradable compounds: 1|Acute Aquatic Toxicity: 1			Biodegradable compounds: 3|UNIFAC: 4|Filter82_pyridinium: 1|Nonbiodegradable compounds: 1
348450276	2-fluoro-3-ureido-prop-2-enoic acid	LINK	0	1	N	N	1	0.0001	0	0	0	0					Idiosyncratic toxicity (RM formation): 1|Biodegradable compounds: 1|alpha halo carbonyl: 1|UNIFAC: 5|Acute Aquatic Toxicity: 2|Michael acceptor: 1|Reactive, unstable, toxic: 3	0.22
493432759	5-fluoro-3-[(3S,4R,5S,6S)-3,4,5-trihydroxy-6-(hydroxymethyl)-2-oxanyl]-1H-pyrimidine-2,4-dione	LINK	0	1	N	N	1	0.0001	0	0	0	0		Nonbiodegradable compounds: 1|Acute Aquatic Toxicity: 1			UNIFAC: 4|Filter82_pyridinium: 1|Nonbiodegradable compounds: 1|Biodegradable compounds: 4
544682925	6-amino-5-fluoro-1,3-diazinane-2,4-dione	LINK	0	1	N	N	1	0.0001	0	0	0	0					alpha halo carbonyl: 1|Acute Aquatic Toxicity: 3|Reactive, unstable, toxic: 2|UNIFAC: 3|Potential electrophilic agents: 1|Idiosyncratic toxicity (RM formation): 1|Skin sensitization: 2
660072650	5-fluoro-2,4-dioxo-1-pyrimidinecarboxylic acid	LINK	0	1	N	N	1	0.0001	0	0	0	0		Acute Aquatic Toxicity: 1|Nonbiodegradable compounds: 1			Biodegradable compounds: 1|Filter82_pyridinium: 1|UNIFAC: 2
5268291	4-amino-1-(3,4-dihydroxy-5-methyl-2-oxolanyl)-2-pyrimidinone	LINK	0	1	N	N	1	0.0001	0	0	0	0					aniline: 1|Filter82_pyridinium: 1|Nonbiodegradable compounds: 1|Genotoxic carcinogenicity, mutagenicity: 3|UNIFAC: 2|Skin sensitization: 2|Biodegradable compounds: 2
1468012285	5-Fluorouridine	LINK	1	2	uri	3.1.3A1(rev)	1675	0.957	0	0	3	50	1467868402	Acute Aquatic Toxicity: 1|Nonbiodegradable compounds: 1	0.783	1468012285	UNIFAC: 3|Biodegradable compounds: 3|Filter82_pyridinium: 1|Nonbiodegradable compounds: 1	0.188		Figure 2
1467981815	Doxifluridine	LINK	1	2	uri	3.5.4A1(rev)	1516	0.888	0	0	1	17	1467868402	Acute Aquatic Toxicity: 1|Nonbiodegradable compounds: 1	0.761	1467869376	Biodegradable compounds: 2|Nonbiodegradable compounds: 1|Filter82_pyridinium: 1|UNIFAC: 2
4359371	1-[2,3-dihydroxy-4-(hydroxymethyl)cyclopentyl]-5-fluoropyrimidine-2,4-dione	LINK	0	2	uri	3.5.4A1(rev)	1516	0.545	0	0	2	33	1467868402	Acute Aquatic Toxicity: 1|Nonbiodegradable compounds: 1	0.488	1468012285	Biodegradable compounds: 3|UNIFAC: 3|Filter82_pyridinium: 1	0.226	20.64
1467984309	(S)-F-Willardiine	LINK	1	2	DU	3.5.4A1(rev)	1522	0.541	0	0	1	20	1467928724	Nonbiodegradable compounds: 1|Acute Aquatic Toxicity: 1	0.562	1467981702	Filter82_pyridinium: 1|Idiosyncratic toxicity (RM formation): 1|UNIFAC: 4|Biodegradable compounds: 2|amino acid: 1	0.649	15.97
4558098	1-ethyl-5-fluoropyrimidine-2,4-dione	LINK	0	2	DU	3.5.4A1(rev)	1522	0.5	0	0	1	20	1467928724	Nonbiodegradable compounds: 1|Acute Aquatic Toxicity: 1	0.731	1467928724	Filter82_pyridinium: 1
6333880	5-fluoro-2,4-dioxo-1H-pyrimidine-6-carboxamide	LINK	0	2	xan	1.1.1D1(rev)	1886	0.354	0	0	2	67	1467928724	Acute Aquatic Toxicity: 1|Nonbiodegradable compounds: 1	0.648	1467928724	UNIFAC: 1
1468012252	56dh5flura	LINK	1	2	xan	1.1.1D1(rev)	1886	0.187	0	0	1	33	1468619625		0.438	4972308	Skin sensitization: 2|alpha halo carbonyl: 1|Idiosyncratic toxicity (RM formation): 1|Acute Aquatic Toxicity: 3|Reactive, unstable, toxic: 2|UNIFAC: 3|Biodegradable compounds: 2|Potential electrophili
1467866262	PAP	LINK	1	2	N	N	1	0.0001	0	0	0	0	1467868376	Skin sensitization: 2|Genotoxic carcinogenicity, mutagenicity: 1	0.731	1467970974	Chelating agents: 1|LD50_mo_oral: 2|Reactive, unstable, toxic: 4|Genotoxic carcinogenicity, mutagenicity: 2|phosphor: 2|Nonbiodegradable compounds: 1|UNIFAC: 1|alkyl esters of S or P: 2|Phosphoric est
1467868402	DT	LINK	1	2	N	N	1	0.0001	0	0	0	0	1467868402	Biodegradable compounds: 2	1	716796	Filter82_pyridinium: 1|UNIFAC: 2|Nonbiodegradable compounds: 1
1467868376	DA	LINK	1	2	N	N	1	0.0001	0	0	0	0	1467868376		1	1467868376	Genotoxic carcinogenicity, mutagenicity: 3|Biodegradable compounds: 3|Nonbiodegradable compounds: 1|Skin sensitization: 2|UNIFAC: 3|aniline: 1|Chelating agents: 1
1467870385	gsn	LINK	1	2	N	N	1	0.0001	0	0	0	0	3254574		0.86	1467870385	Skin sensitization: 2|aniline: 1|Genotoxic carcinogenicity, mutagenicity: 3|Biodegradable compounds: 3|Nonbiodegradable compounds: 1|UNIFAC: 3
1467867901	CN-	LINK	0	2	N	N	1	0.0001	0	0	0	0					imine: 1|acyclic N-,=N and not N bound to carbonyl or sulfo: 1|Oxygen-nitrogen single bond: 1|Reactive, unstable, toxic: 4|Carbocation/anion: 1|Biodegradable compounds: 1|Nonbiodegradable compounds: 1
2137884	5-fluoro-1-[3-hydroxy-4-(hydroxymethyl)cyclopentyl]pyrimidine-2,4-dione	LINK	0	2	N	N	1	0.0001	0	0	0	0		Acute Aquatic Toxicity: 1|Nonbiodegradable compounds: 1			Biodegradable compounds: 2|UNIFAC: 2|Filter82_pyridinium: 1
4247199	1-[2,3-dihydroxy-4-(hydroxymethyl)cyclopentyl]pyrimidine-2,4-dione	LINK	0	2	N	N	1	0.0001	0	0	0	0					UNIFAC: 3|Biodegradable compounds: 3|Filter82_pyridinium: 1
5850519	1-[(1R,4R,5S)-4,5-dihydroxy-3-(hydroxymethyl)-1-cyclopent-2-enyl]-5-fluoropyrimidine-2,4-dione	LINK	0	2	N	N	1	0.0001	0	0	0	0		Acute Aquatic Toxicity: 1|Nonbiodegradable compounds: 1			Genotoxic carcinogenicity, mutagenicity: 1|Biodegradable compounds: 3|isolated alkene: 1|Potential electrophilic agents: 1|Filter82_pyridinium: 1|Skin sensitization: 1|UNIFAC: 5
168182581	5-fluoro-1-[2,3,5-trihydroxy-4-(hydroxymethyl)cyclopentyl]pyrimidine-2,4-dione	LINK	0	2	N	N	1	0.0001	0	0	0	0		Acute Aquatic Toxicity: 1|Nonbiodegradable compounds: 1			Filter82_pyridinium: 1|Biodegradable compounds: 4|UNIFAC: 4
401269895	(2R,3R,4R)-2,3-dihydroxy-4-(hydroxymethyl)cyclopentanone	LINK	0	2	N	N	1	0.0001	0	0	0	0					UNIFAC: 5|Skin sensitization: 1|Nonbiodegradable compounds: 1|Biodegradable compounds: 3|Reactive, unstable, toxic: 2|Ketone: 1
41222699	1-ethylpyrimidine-2,4-dione	LINK	0	2	N	N	1	0.0001	0	0	0	0					Filter82_pyridinium: 1
52266770	5-fluoro-1-(2-hydroxyethyl)pyrimidine-2,4-dione	LINK	0	2	N	N	1	0.0001	0	0	0	0		Nonbiodegradable compounds: 1|Acute Aquatic Toxicity: 1			Biodegradable compounds: 1|UNIFAC: 1|Filter82_pyridinium: 1
124787841	5-fluoro-1-propylpyrimidine-2,4-dione	LINK	0	2	N	N	1	0.0001	0	0	0	0		Acute Aquatic Toxicity: 1|Nonbiodegradable compounds: 1			Filter82_pyridinium: 1
171635765	5-fluoro-1-isopropyl-pyrimidine-2,4-dione	LINK	0	2	N	N	1	0.0001	0	0	0	0		Acute Aquatic Toxicity: 1|Nonbiodegradable compounds: 1			Filter82_pyridinium: 1
449391202	3-(5-fluoro-2,4-dioxo-1-pyrimidinyl)propanamide	LINK	0	2	N	N	1	0.0001	0	0	0	0		Acute Aquatic Toxicity: 1|Nonbiodegradable compounds: 1			UNIFAC: 1|Filter82_pyridinium: 1
169270182	5-fluoro-6-hydroxy-1H-pyrimidine-2,4-dione	LINK	0	2	N	N	1	0.0001	0	0	0	0		Nonbiodegradable compounds: 1|Acute Aquatic Toxicity: 1			Biodegradable compounds: 1
7707	2,3,4-trihydroxy-5-(hydroxymethyl)-2-oxolanecarboxylic acid	LINK	0	2	N	N	1	0.0001	0	0	0	0					Nonbiodegradable compounds: 1|Biodegradable compounds: 5|UNIFAC: 6|Idiosyncratic toxicity (RM formation): 1
1956106	(2R,3S,4R,5R)-2-(hydroxymethyl)-5-methoxyoxolane-3,4-diol	LINK	0	2	N	N	1	0.0001	0	0	0	0					UNIFAC: 4|acetal: 1|Reactive, unstable, toxic: 2|Skin sensitization: 1|Biodegradable compounds: 3|Nonbiodegradable compounds: 2
7426425	5drib	LINK	0	2	N	N	1	0.0001	0	0	0	0					Biodegradable compounds: 3|UNIFAC: 3|Reactive, unstable, toxic: 1|Skin sensitization: 1|hemiacetal: 1|Nonbiodegradable compounds: 1
124122395	5-(methoxymethyl)oxolane-2,3,4-triol	LINK	0	2	N	N	1	0.0001	0	0	0	0					Nonbiodegradable compounds: 2|Skin sensitization: 1|Biodegradable compounds: 3|Reactive, unstable, toxic: 1|hemiacetal: 1|UNIFAC: 4
152709200	5-(hydroxymethyl)-2-methyloxolane-2,3,4-triol	LINK	0	2	N	N	1	0.0001	0	0	0	0					UNIFAC: 4|Biodegradable compounds: 4|Skin sensitization: 1|Nonbiodegradable compounds: 1
152904345	3,4,5-trihydroxy-2-oxolanecarboxaldehyde	LINK	0	2	N	N	1	0.0001	0	0	0	0					Skin sensitization: 4|Potential electrophilic agents: 1|Nonbiodegradable compounds: 1|aldehyde: 5|Filter38_aldehyde: 1|UNIFAC: 4|Reactive, unstable, toxic: 5|Biodegradable compounds: 4|hemiacetal: 1|N
182949084	(3R,4R,5R)-5-(hydroxymethyl)-3-methyloxolane-2,3,4-triol	LINK	0	2	N	N	1	0.0001	0	0	0	0					Biodegradable compounds: 4|Nonbiodegradable compounds: 1|UNIFAC: 4|hemiacetal: 1|Skin sensitization: 1|Reactive, unstable, toxic: 1
183078432	[4,5-dihydroxy-2-(hydroxymethyl)-3-oxolanyl] dihydrogen phosphate	LINK	0	2	N	N	1	0.0001	0	0	0	0					S/PO3 groups: 4|Phosphoric ester: 1|Skin sensitization: 1|Biodegradable compounds: 3|Nonbiodegradable compounds: 1|alkyl esters of S or P: 1|phosphor: 1|Reactive, unstable, toxic: 3|hemiacetal: 1|Phos
279033288	[(3R,4S,5S)-4,5,6-trihydroxy-3-oxanyl] dihydrogen phosphate	LINK	0	2	N	N	1	0.0001	0	0	0	0					hemiacetal: 1|Skin sensitization: 1|S/PO3 groups: 4|Phosphoric ester: 1|Reactive, unstable, toxic: 3|Biodegradable compounds: 3|Nonbiodegradable compounds: 1|alkyl esters of S or P: 1|phosphor: 1|Phos
305749629	(2R,3R)-2-(hydroxymethyl)-2,3-dihydrofuran-3,4-diol	LINK	0	2	N	N	1	0.0001	0	0	0	0					UNIFAC: 5|Biodegradable compounds: 3|Skin sensitization: 1|Nonbiodegradable compounds: 1
349332437	(3R,4S,5R)-2,3,4-trihydroxy-5-(hydroxymethyl)-2-oxolanecarboxamide	LINK	0	2	N	N	1	0.0001	0	0	0	0					UNIFAC: 5|Biodegradable compounds: 4|Nonbiodegradable compounds: 1
349810317	(2R,3R,4R,5R)-5-(hydroxymethyl)-5-methyloxolane-2,3,4-triol	LINK	0	2	N	N	1	0.0001	0	0	0	0					Nonbiodegradable compounds: 1|Reactive, unstable, toxic: 1|Skin sensitization: 1|hemiacetal: 1|Biodegradable compounds: 4|UNIFAC: 4
350488338	(3R,4R,5R)-5-(hydroxymethyl)-4-methoxyoxolane-2,3-diol	LINK	0	2	N	N	1	0.0001	0	0	0	0					Reactive, unstable, toxic: 1|Biodegradable compounds: 3|UNIFAC: 4|Nonbiodegradable compounds: 2|hemiacetal: 1|Skin sensitization: 1
378570209	(1R,2S,4R,5S)-4-(hydroxymethyl)-3,6-dioxabicyclo[3.1.0]hexan-2-ol	LINK	0	2	N	N	1	0.0001	0	0	0	0					Biodegradable compounds: 2|Filter40_epoxide_aziridine: 1|Non-genotoxic carcinogenicity: 1|hemiacetal: 1|Reactive, unstable, toxic: 4|Skin sensitization: 3|Genotoxic carcinogenicity, mutagenicity: 4|No
380543341	(3R,4R,5R)-5-(hydroxymethyl)oxolane-2,2,3,4-tetrol	LINK	0	2	N	N	1	0.0001	0	0	0	0					Orthoester: 1|Biodegradable compounds: 5|non_ring_ketal: 1|het-C-het not in ring: 1|Nonbiodegradable compounds: 1|UNIFAC: 5
483351349	(3R,4S,5R)-5-(hydroxymethyl)-4-methyloxolane-2,3,4-triol	LINK	0	2	N	N	1	0.0001	0	0	0	0					Reactive, unstable, toxic: 1|Nonbiodegradable compounds: 1|hemiacetal: 1|UNIFAC: 4|Skin sensitization: 1|Biodegradable compounds: 4
495136774	(3S,4S,5S,6R)-2-[[(2R,3R,4S,5S)-2,4-dihydroxy-5-(hydroxymethyl)-3-oxolanyl]oxy]-6-methyloxane-3,4,5-triol	LINK	0	2	N	N	1	0.0001	0	0	0	0					Reactive, unstable, toxic: 3|Skin sensitization: 2|Biodegradable compounds: 6|UNIFAC: 6|acetal: 1|Nonbiodegradable compounds: 3|hemiacetal: 1
499359386	2-(hydroxymethyl)oxolane-2,3,4,5-tetrol	LINK	0	2	N	N	1	0.0001	0	0	0	0					Nonbiodegradable compounds: 1|hemiacetal: 1|Reactive, unstable, toxic: 1|Skin sensitization: 2|Biodegradable compounds: 5|UNIFAC: 5
508944978	[(3R,4S,5R)-2,4-dihydroxy-5-(hydroxymethyl)-3-oxolanyl] dihydrogen phosphate	LINK	0	2	N	N	1	0.0001	0	0	0	0					Biodegradable compounds: 3|UNIFAC: 5|alkyl esters of S or P: 1|phosphor: 1|Phosphoric acid: 1|Nonbiodegradable compounds: 1|S/PO3 groups: 4|Phosphoric ester: 1|hemiacetal: 1|Reactive, unstable, toxic:
553720244	sulfuric acid [(2R,3S,4S)-3,4,5-trihydroxy-2-oxolanyl]methyl ester	LINK	0	2	N	N	1	0.0001	0	0	0	0					UNIFAC: 4|hemiacetal: 1|Hetero_hetero: 1|Nonbiodegradable compounds: 1|Reactive, unstable, toxic: 7|S/PO3 groups: 4|Skin sensitization: 1|Biodegradable compounds: 3|Sulfonate_Ester: 1|Sulfonic acid: 2
634008912	(3R,4R,5R)-3-(hydroxymethyl)-2,6-dioxabicyclo[3.1.0]hexan-4-ol	LINK	0	2	N	N	1	0.0001	0	0	0	0					epoxide, aziridine, thioepoxide: 1|Reactive, unstable, toxic: 4|Three_Membered_Heterocycle: 1|UNIFAC: 5|epoxides: 1|Skin sensitization: 2|Genotoxic carcinogenicity, mutagenicity: 4|Filter40_epoxide_az
667855462	(2S,3R,4S,5S)-5-(dihydroxymethyl)oxolane-2,3,4-triol	LINK	0	2	N	N	1	0.0001	0	0	0	0					Reactive, unstable, toxic: 1|hemiacetal: 1|Biodegradable compounds: 5|UNIFAC: 5|Nonbiodegradable compounds: 1|Skin sensitization: 2|non_ring_acetal: 1|het-C-het not in ring: 1
670247892	(2S)-2-hydroxy-2-[(2R,3R,4R)-3,4,5-trihydroxy-2-oxolanyl]acetamide	LINK	0	2	N	N	1	0.0001	0	0	0	0					UNIFAC: 5|Nonbiodegradable compounds: 1|Skin sensitization: 1|Reactive, unstable, toxic: 1|hemiacetal: 1|Biodegradable compounds: 4
800518149	(4S,5R)-4-hydroxy-5-(hydroxymethyl)-3-oxolanone	LINK	0	2	N	N	1	0.0001	0	0	0	0					Skin sensitization: 1|Nonbiodegradable compounds: 2|Ketone: 1|Biodegradable compounds: 2|UNIFAC: 5|Reactive, unstable, toxic: 1
1116609308	(3R,5R)-5-(hydroxymethyl)oxolane-2,3,4,4-tetrol	LINK	0	2	N	N	1	0.0001	0	0	0	0					het-C-het not in ring: 1|hemiacetal: 1|UNIFAC: 5|Nonbiodegradable compounds: 1|Reactive, unstable, toxic: 1|Biodegradable compounds: 5|Skin sensitization: 2|non_ring_ketal: 2
1166055059	sulfuric acid [(3R,4S,5R)-3,4-dihydroxy-5-(hydroxymethyl)-2-oxolanyl] ester	LINK	0	2	N	N	1	0.0001	0	0	0	0					Sulfonate_Ester: 1|Sulfonic acid: 2|alkyl esters of S or P: 2|Nonbiodegradable compounds: 1|Biodegradable compounds: 3|UNIFAC: 4|Skin sensitization: 1|S/PO3 groups: 4|Reactive, unstable, toxic: 7|Hete
1467906853	RL	LINK	1	2	N	N	1	0.0001	0	0	0	0				5167500	Nonbiodegradable compounds: 1|Biodegradable compounds: 4|Skin sensitization: 1|UNIFAC: 6|Ketone: 1|Reactive, unstable, toxic: 2|aliphatic ketone not ring and not di-carbonyl: 1
1468642232	Arabinofuranobiose	LINK	1	2	N	N	1	0.0001	0	0	0	0					Reactive, unstable, toxic: 3|Biodegradable compounds: 6|UNIFAC: 6|acetal: 1|Nonbiodegradable compounds: 3|Skin sensitization: 2|hemiacetal: 1
1468711492	2-O-Methyl-D-xylose	LINK	1	2	N	N	1	0.0001	0	0	0	0					UNIFAC: 4|Reactive, unstable, toxic: 1|Skin sensitization: 1|hemiacetal: 1|Nonbiodegradable compounds: 2|Biodegradable compounds: 3
5313821	ethene-1,2-diamine	LINK	0	2	N	N	1	0.0001	0	0	0	0					UNIFAC: 3
1467887918	Primary diamine	LINK	1	2	N	N	1	0.0001	0	0	0	0					non_ring_CH2O_acetal: 1|UNIFAC: 3|acyclic N-C-N: 1|Skin sensitization: 4|Reactive, unstable, toxic: 1|het-C-het not in ring: 1
1468117168	2-methyladenosine	LINK	0	2	N	N	1	0.0001	0	0	0	0					Biodegradable compounds: 3|Nonbiodegradable compounds: 1|Genotoxic carcinogenicity, mutagenicity: 3|UNIFAC: 3|Chelating agents: 1|Skin sensitization: 2|aniline: 1
3737249	5-(5-fluoro-2,4-dioxo-1-pyrimidinyl)-3-hydroxy-2-oxolanecarboxylic acid	LINK	0	2	N	N	1	0.0001	0	0	0	0		Acute Aquatic Toxicity: 1|Nonbiodegradable compounds: 1			Reactive, unstable, toxic: 1|UNIFAC: 3|Nonbiodegradable compounds: 1|Idiosyncratic toxicity (RM formation): 1|Biodegradable compounds: 2|Filter82_pyridinium: 1
3843725	5-fluoro-1-[5-(hydroxymethyl)-2,5-dihydrofuran-2-yl]pyrimidine-2,4-dione	LINK	0	2	N	N	1	0.0001	0	0	0	0		Acute Aquatic Toxicity: 1|Nonbiodegradable compounds: 1			Biodegradable compounds: 1|Nonbiodegradable compounds: 1|Filter82_pyridinium: 1|isolated alkene: 1|UNIFAC: 4
4306684	5-fluoro-1-(4-hydroxy-5-methyl-2-oxolanyl)pyrimidine-2,4-dione	LINK	0	2	N	N	1	0.0001	0	0	0	0		Acute Aquatic Toxicity: 1|Nonbiodegradable compounds: 1			UNIFAC: 1|Nonbiodegradable compounds: 1|Biodegradable compounds: 1|Filter82_pyridinium: 1	0.661	60.84
4617684	5-fluoro-1-[5-(hydroxymethyl)-2-oxolanyl]pyrimidine-2,4-dione	LINK	0	2	N	N	1	0.0001	0	0	0	0		Nonbiodegradable compounds: 1|Acute Aquatic Toxicity: 1			Filter82_pyridinium: 1|Nonbiodegradable compounds: 1|UNIFAC: 1|Biodegradable compounds: 1	0.287	57.78
52546585	5-fluoro-1-[(2R,3S,4S,5R)-4-hydroxy-5-(hydroxymethyl)-3-methyl-2-oxolanyl]pyrimidine-2,4-dione	LINK	0	2	N	N	1	0.0001	0	0	0	0		Acute Aquatic Toxicity: 1|Nonbiodegradable compounds: 1			UNIFAC: 2|Filter82_pyridinium: 1|Biodegradable compounds: 2|Nonbiodegradable compounds: 1	0.684	56.17
103859651	5-fluoro-1-[(2R,4S,5R)-5-(hydroxymethyl)-4-methoxy-2-oxolanyl]pyrimidine-2,4-dione	LINK	0	2	N	N	1	0.0001	0	0	0	0		Acute Aquatic Toxicity: 1|Nonbiodegradable compounds: 1			Filter82_pyridinium: 1|UNIFAC: 2|Biodegradable compounds: 1|Nonbiodegradable compounds: 2	0.604	54.7
104623372	5-fluoro-1-[(2R,4S,5R)-4-hydroxy-5-(methoxymethyl)-2-oxolanyl]pyrimidine-2,4-dione	LINK	0	2	N	N	1	0.0001	0	0	0	0		Acute Aquatic Toxicity: 1|Nonbiodegradable compounds: 1			Biodegradable compounds: 1|Nonbiodegradable compounds: 2|Filter82_pyridinium: 1|UNIFAC: 2	0.714	53.72
124936840	5-fluoro-6-hydroxy-1-[4-hydroxy-5-(hydroxymethyl)-2-oxolanyl]-1,3-diazinane-2,4-dione	LINK	0	2	N	N	1	0.0001	0	0	0	0					Reactive, unstable, toxic: 2|Skin sensitization: 2|UNIFAC: 3|alpha halo carbonyl: 1|Nonbiodegradable compounds: 1|Acute Aquatic Toxicity: 3|Idiosyncratic toxicity (RM formation): 1|Biodegradable compo	0.414	53.1
129023520	5-fluoro-1-[(2R,4S,5R)-4-hydroxy-5-(hydroxymethyl)-2-oxolanyl]-3-methylpyrimidine-2,4-dione	LINK	0	2	N	N	1	0.0001	0	0	0	0		Acute Aquatic Toxicity: 1|Nonbiodegradable compounds: 1			Filter82_pyridinium: 2|Nonbiodegradable compounds: 1|Biodegradable compounds: 2|UNIFAC: 2	0.354	51.87
280067964	5-fluoro-1-[4-hydroxy-5-(hydroxymethyl)-2-oxolanyl]-1,3-diazinane-2,4-dione	LINK	0	2	N	N	1	0.0001	0	0	0	0					alpha halo carbonyl: 1|Idiosyncratic toxicity (RM formation): 1|Nonbiodegradable compounds: 1|Acute Aquatic Toxicity: 3|Potential electrophilic agents: 1|Skin sensitization: 2|UNIFAC: 4|Biodegradable	0.262	51.32
344680969	1-[(4S,5R)-2,4-dihydroxy-5-(hydroxymethyl)-2-oxolanyl]-5-fluoropyrimidine-2,4-dione	LINK	0	2	N	N	1	0.0001	0	0	0	0		Acute Aquatic Toxicity: 1|Nonbiodegradable compounds: 1			Filter82_pyridinium: 1|Biodegradable compounds: 3|Skin sensitization: 1|UNIFAC: 3|Nonbiodegradable compounds: 1	0.26	51.15
657200208	6-amino-5-fluoro-3-[4-hydroxy-5-(hydroxymethyl)-2-oxolanyl]-1,6-dihydropyrimidin-2-one	LINK	0	2	N	N	1	0.0001	0	0	0	0					Biodegradable compounds: 2|UNIFAC: 7|Reactive, unstable, toxic: 1|Skin sensitization: 1|Nonbiodegradable compounds: 1	0.298	50.9
786599249	[(2R,3S,5R)-5-(5-fluoro-2,4-dioxo-1-pyrimidinyl)-2-(hydroxymethyl)-3-oxolanyl] dihydrogen phosphate	LINK	0	2	N	N	1	0.0001	0	0	0	0		Acute Aquatic Toxicity: 1|Nonbiodegradable compounds: 1			Nonbiodegradable compounds: 1|Phosphoric ester: 1|Filter82_pyridinium: 1|Biodegradable compounds: 1|phosphor: 1|Reactive, unstable, toxic: 2|UNIFAC: 3|S/PO3 groups: 4|Phosphoric acid: 1|alkyl esters o	0.178	48.21
790642950	5-fluoro-1-[(2R,4S,5R)-4-hydroxy-5-[[(2R,3R,4S,5R,6R)-3,4,5-trihydroxy-6-(hydroxymethyl)-2-oxanyl]oxymethyl]-2-oxolanyl]pyrimidine-2,4-dione	LINK	0	2	N	N	1	0.0001	0	0	0	0		Acute Aquatic Toxicity: 1|Nonbiodegradable compounds: 1			acetal: 1|Nonbiodegradable compounds: 3|Skin sensitization: 1|Filter82_pyridinium: 1|Biodegradable compounds: 5|Reactive, unstable, toxic: 2|UNIFAC: 6	1	47
6392571	3,4-dihydroxy-5-methyl-2-oxolanone	LINK	0	2	N	N	1	0.0001	0	0	0	0					Ester: 1|UNIFAC: 3|Acute Aquatic Toxicity: 1|Biodegradable compounds: 3|Reactive, unstable, toxic: 3	0.832	40.77
97425361	1-[(2R,3R,4S,5R)-3,4-dihydroxy-5-methyl-2-oxolanyl]-5-fluoro-3-methylpyrimidine-2,4-dione	LINK	0	2	N	N	1	0.0001	0	0	0	0		Acute Aquatic Toxicity: 1|Nonbiodegradable compounds: 1			Biodegradable compounds: 2|Nonbiodegradable compounds: 1|Filter82_pyridinium: 2|UNIFAC: 2	0.752	37.79
98672959	1-[(2R,3S,4S)-3,4-dihydroxy-2-oxolanyl]-5-fluoropyrimidine-2,4-dione	LINK	0	2	N	N	1	0.0001	0	0	0	0		Acute Aquatic Toxicity: 1|Nonbiodegradable compounds: 1			Biodegradable compounds: 2|Nonbiodegradable compounds: 1|Filter82_pyridinium: 1|UNIFAC: 3	1	36.52
125778372	1-(5-ethyl-3,4-dihydroxy-2-oxolanyl)-5-fluoropyrimidine-2,4-dione	LINK	0	2	N	N	1	0.0001	0	0	0	0		Acute Aquatic Toxicity: 1|Nonbiodegradable compounds: 1			Nonbiodegradable compounds: 1|Biodegradable compounds: 2|UNIFAC: 2|Filter82_pyridinium: 1	0.957	36.4
171793629	1-(3,4-dihydroxy-5,5-dimethyl-2-oxolanyl)-5-fluoropyrimidine-2,4-dione	LINK	0	2	N	N	1	0.0001	0	0	0	0		Acute Aquatic Toxicity: 1|Nonbiodegradable compounds: 1			UNIFAC: 2|Biodegradable compounds: 2|Nonbiodegradable compounds: 1|Filter82_pyridinium: 1	0.899	35.62
283828022	1-[(2R,3R,4S,5R)-3,4-dihydroxy-5-methyl-2-oxolanyl]-5-fluoro-1,3-diazinane-2,4-dione	LINK	0	2	N	N	1	0.0001	0	0	0	0					alpha halo carbonyl: 1|Idiosyncratic toxicity (RM formation): 1|Nonbiodegradable compounds: 1|Acute Aquatic Toxicity: 3|Biodegradable compounds: 2|Potential electrophilic agents: 1|Skin sensitization:	0.408	34.93
376217713	[(2R,3S,4R,5R)-5-(5-fluoro-2,4-dioxo-1-pyrimidinyl)-4-hydroxy-2-methyl-3-oxolanyl] dihydrogen phosphate	LINK	0	2	N	N	1	0.0001	0	0	0	0		Acute Aquatic Toxicity: 1|Nonbiodegradable compounds: 1			alkyl esters of S or P: 1|UNIFAC: 3|Phosphoric ester: 1|Phosphoric acid: 1|phosphor: 1|Nonbiodegradable compounds: 1|Reactive, unstable, toxic: 2|Filter82_pyridinium: 1|S/PO3 groups: 4|Biodegradable c	0.8	34.51
376217724	[(2R,3R,4R,5R)-2-(5-fluoro-2,4-dioxo-1-pyrimidinyl)-4-hydroxy-5-methyl-3-oxolanyl] dihydrogen phosphate	LINK	0	2	N	N	1	0.0001	0	0	0	0		Acute Aquatic Toxicity: 1|Nonbiodegradable compounds: 1			Nonbiodegradable compounds: 1|Reactive, unstable, toxic: 2|Filter82_pyridinium: 1|S/PO3 groups: 4|Biodegradable compounds: 1|alkyl esters of S or P: 1|UNIFAC: 3|Phosphoric ester: 1|Phosphoric acid: 1|	0.396	34.07
394764570	3-[(2R,4R,5R)-3,4-dihydroxy-5-methyl-2-oxolanyl]-5-fluoro-6-hydroxy-1,6-dihydropyrimidin-2-one	LINK	0	2	N	N	1	0.0001	0	0	0	0					Biodegradable compounds: 3|UNIFAC: 6|Skin sensitization: 1|Nonbiodegradable compounds: 1	0.995	33.8
527336856	3-[(2R,3R,4S,5R)-3,4-dihydroxy-5-methyl-2-oxolanyl]-5-fluoro-2-hydroxy-1,2-dihydropyrimidin-6-one	LINK	0	2	N	N	1	0.0001	0	0	0	0					UNIFAC: 6|Reactive, unstable, toxic: 3|Skin sensitization: 1|Biodegradable compounds: 3|Nonbiodegradable compounds: 1|alpha halo carbonyl: 1|Acute Aquatic Toxicity: 3	0.554	32.92
1469356561	5'-deoxyuridine	LINK	0	2	N	N	1	0.0001	0	0	0	0					UNIFAC: 2|Filter82_pyridinium: 1|Nonbiodegradable compounds: 1|Biodegradable compounds: 2	1	31.88
542155399	5-fluoro-1-methyl-1,3-diazinane-2,4-dione	LINK	0	2	N	N	1	0.0001	0	0	0	0					Idiosyncratic toxicity (RM formation): 1|UNIFAC: 1|Reactive, unstable, toxic: 1|Skin sensitization: 2|Potential electrophilic agents: 1|alpha halo carbonyl: 1|Acute Aquatic Toxicity: 3	0.848	31.37
4261002	5-fluoro-1-[4-hydroxy-5-(hydroxymethyl)-3-methoxy-2-oxolanyl]pyrimidine-2,4-dione	LINK	0	2	N	N	1	0.0001	0	0	0	0		Acute Aquatic Toxicity: 1|Nonbiodegradable compounds: 1			Filter82_pyridinium: 1|UNIFAC: 3|Nonbiodegradable compounds: 2|Biodegradable compounds: 2	0.699	31.28
4592093	5-fluoro-1-[4-(hydroxymethyl)-3,6-dioxabicyclo[3.1.0]hexan-2-yl]pyrimidine-2,4-dione	LINK	0	2	N	N	1	0.0001	0	0	0	0		Acute Aquatic Toxicity: 1|Nonbiodegradable compounds: 1			Biodegradable compounds: 1|epoxide, aziridine, thioepoxide: 1|Skin sensitization: 2|Three-membered heterocycle: 1|Genotoxic carcinogenicity, mutagenicity: 4|epoxides: 1|Filter82_pyridinium: 1|Reactive	0.507	31.1
4598695	2-amino-1-[3,4-dihydroxy-5-(hydroxymethyl)-2-oxolanyl]-5-fluoro-4-pyrimidinone	LINK	0	2	N	N	1	0.0001	0	0	0	0		Acute Aquatic Toxicity: 1|Nonbiodegradable compounds: 1			UNIFAC: 3|Biodegradable compounds: 3|aniline: 1|Skin sensitization: 2|Genotoxic carcinogenicity, mutagenicity: 3|Filter82_pyridinium: 1|Nonbiodegradable compounds: 1	0.648	30.63
6039643	1-[(2R,3R,4S,5R)-3,4-dihydroxy-5-(hydroxymethyl)-5-methyl-2-oxolanyl]-5-fluoropyrimidine-2,4-dione	LINK	0	2	N	N	1	0.0001	0	0	0	0		Acute Aquatic Toxicity: 1|Nonbiodegradable compounds: 1			UNIFAC: 3|Biodegradable compounds: 3|Nonbiodegradable compounds: 1|Filter82_pyridinium: 1	0.367	29.83
18068406	(2R)-2-[(2S,3R,4S,5S)-5-(5-fluoro-2,4-dioxo-1-pyrimidinyl)-3,4-dihydroxy-2-oxolanyl]-2-hydroxyacetamide	LINK	0	2	N	N	1	0.0001	0	0	0	0		Acute Aquatic Toxicity: 1|Nonbiodegradable compounds: 1			Filter82_pyridinium: 1|Nonbiodegradable compounds: 1|UNIFAC: 4|Biodegradable compounds: 3	0.773	29.82
52548895	5-fluoro-1-[(2R,3R,5S)-3-hydroxy-5-(hydroxymethyl)-2-oxolanyl]pyrimidine-2,4-dione	LINK	0	2	N	N	1	0.0001	0	0	0	0		Acute Aquatic Toxicity: 1|Nonbiodegradable compounds: 1			UNIFAC: 2|Filter82_pyridinium: 1|Biodegradable compounds: 2|Nonbiodegradable compounds: 1	0.472	29.45
94771894	6-amino-3-[(3R,4S,5R)-3,4-dihydroxy-5-(hydroxymethyl)-2-oxolanyl]-5-fluoro-1,6-dihydropyrimidin-2-one	LINK	0	2	N	N	1	0.0001	0	0	0	0					Skin sensitization: 1|Biodegradable compounds: 3|Nonbiodegradable compounds: 1|UNIFAC: 8|Reactive, unstable, toxic: 1	0.833	29.16
95341727	1-[(2R,3R,4S,5R)-3,4-dihydroxy-5-[[(2R,3R,4S,5R,6R)-3,4,5-trihydroxy-6-(hydroxymethyl)-2-oxanyl]oxymethyl]-2-oxolanyl]-5-fluoropyrimidine-2,4-dione	LINK	0	2	N	N	1	0.0001	0	0	0	0		Acute Aquatic Toxicity: 1|Nonbiodegradable compounds: 1			UNIFAC: 7|Reactive, unstable, toxic: 2|Skin sensitization: 1|acetal: 1|Biodegradable compounds: 6|Nonbiodegradable compounds: 3|Filter82_pyridinium: 1	0.903	27.91
121740632	1-[3,4-dihydroxy-5-(hydroxymethyl)-2-oxolanyl]-5-fluoro-6-hydroxy-1,3-diazinane-2,4-dione	LINK	0	2	N	N	1	0.0001	0	0	0	0					alpha halo carbonyl: 1|Acute Aquatic Toxicity: 3|UNIFAC: 4|Idiosyncratic toxicity (RM formation): 1|Biodegradable compounds: 4|Potential electrophilic agents: 1|Reactive, unstable, toxic: 2|Skin sensi	0.594	27.65
131206792	1-[(2R,3R,4S,5R)-3,4-dihydroxy-5-(hydroxymethyl)-4-methyl-2-oxolanyl]-5-fluoropyrimidine-2,4-dione	LINK	0	2	N	N	1	0.0001	0	0	0	0		Acute Aquatic Toxicity: 1|Nonbiodegradable compounds: 1			Biodegradable compounds: 3|UNIFAC: 3|Filter82_pyridinium: 1|Nonbiodegradable compounds: 1	0.975	26.93
181972258	5-fluoro-1-[(2R,3R,4S,5R)-3-hydroxy-5-(hydroxymethyl)-4-methoxy-2-oxolanyl]pyrimidine-2,4-dione	LINK	0	2	N	N	1	0.0001	0	0	0	0		Acute Aquatic Toxicity: 1|Nonbiodegradable compounds: 1			Filter82_pyridinium: 1|UNIFAC: 3|Biodegradable compounds: 2|Nonbiodegradable compounds: 2	0.754	26.36
278849152	5-(5-fluoro-2,4-dioxo-1-pyrimidinyl)-3,4-dihydroxy-2-oxolanecarboxylic acid	LINK	0	2	N	N	1	0.0001	0	0	0	0		Acute Aquatic Toxicity: 1|Nonbiodegradable compounds: 1			UNIFAC: 4|Biodegradable compounds: 3|Nonbiodegradable compounds: 1|Reactive, unstable, toxic: 1|Idiosyncratic toxicity (RM formation): 1|Filter82_pyridinium: 1	0.734	26.03
283827562	1-[(2R,3R,4S,5R)-3,4-dihydroxy-5-(hydroxymethyl)-2-oxolanyl]-5-fluoro-1,3-diazinane-2,4-dione	LINK	0	2	N	N	1	0.0001	0	0	0	0					Biodegradable compounds: 3|Potential electrophilic agents: 1|Skin sensitization: 2|UNIFAC: 5|Reactive, unstable, toxic: 1|alpha halo carbonyl: 1|Idiosyncratic toxicity (RM formation): 1|Nonbiodegradab	0.561	25.82
299258385	(3S,4S,5R)-6-[[(2R,3S,4R)-5-(5-fluoro-2,4-dioxo-1-pyrimidinyl)-3,4-dihydroxy-2-oxolanyl]methoxy]-3,4,5-trihydroxy-2-oxanecarboxylic acid	LINK	0	2	N	N	1	0.0001	0	0	0	0		Nonbiodegradable compounds: 1|Acute Aquatic Toxicity: 1			Skin sensitization: 1|UNIFAC: 8|Reactive, unstable, toxic: 3|Idiosyncratic toxicity (RM formation): 1|Nonbiodegradable compounds: 3|Filter82_pyridinium: 1|Biodegradable compounds: 6|acetal: 1	0.977	25.15
350062558	1-[(2R,3R,4S,5R)-3,4-dihydroxy-5-(methoxymethyl)-2-oxolanyl]-5-fluoropyrimidine-2,4-dione	LINK	0	2	N	N	1	0.0001	0	0	0	0		Acute Aquatic Toxicity: 1|Nonbiodegradable compounds: 1			Nonbiodegradable compounds: 2|Filter82_pyridinium: 1|Biodegradable compounds: 2|UNIFAC: 3	0.52	24
488793670	1-[(2R,3R,4R,5R)-3,4-dihydroxy-5-(hydroxymethyl)-3-methyl-2-oxolanyl]-5-fluoropyrimidine-2,4-dione	LINK	0	2	N	N	1	0.0001	0	0	0	0		Nonbiodegradable compounds: 1|Acute Aquatic Toxicity: 1			Filter82_pyridinium: 1|Nonbiodegradable compounds: 1|Biodegradable compounds: 3|UNIFAC: 3	0.784	23.82
501887784	1-[(3S,4S,5R)-3,4-dihydroxy-5-(hydroxymethyl)-2-oxolanyl]-5-fluoro-3-methylpyrimidine-2,4-dione	LINK	0	2	N	N	1	0.0001	0	0	0	0		Acute Aquatic Toxicity: 1|Nonbiodegradable compounds: 1			Filter82_pyridinium: 2|Nonbiodegradable compounds: 1|Biodegradable compounds: 3|UNIFAC: 3	0.9	23.62
516336039	1-[(2R,3R,4S,5R)-3,4-dihydroxy-5-(hydroxymethyl)-2-methyl-2-oxolanyl]-5-fluoropyrimidine-2,4-dione	LINK	0	2	N	N	1	0.0001	0	0	0	0		Acute Aquatic Toxicity: 1|Nonbiodegradable compounds: 1			UNIFAC: 3|Filter82_pyridinium: 1|Nonbiodegradable compounds: 1|Biodegradable compounds: 3	0.629	21.6
667207608	1-[(2R,3R,4S)-3,4-dihydroxy-5-methylene-2-oxolanyl]-5-fluoropyrimidine-2,4-dione	LINK	0	2	N	N	1	0.0001	0	0	0	0		Acute Aquatic Toxicity: 1|Nonbiodegradable compounds: 1			Nonbiodegradable compounds: 2|Biodegradable compounds: 2|UNIFAC: 4|Ethene: 1|Filter82_pyridinium: 1|Skin sensitization: 1	0.327	21.59
667891820	3-[(2R,3R,4S,5R)-3,4-dihydroxy-5-(hydroxymethyl)-2-oxolanyl]-5-fluoro-2,6-dioxo-4-pyrimidinecarboxylic acid	LINK	0	2	N	N	1	0.0001	0	0	0	0		Acute Aquatic Toxicity: 1|Nonbiodegradable compounds: 1			Idiosyncratic toxicity (RM formation): 1|Filter82_pyridinium: 1|Nonbiodegradable compounds: 1|Biodegradable compounds: 4|UNIFAC: 5	0.553	21.31
681503799	[(2S,5S)-5-(5-fluoro-2,4-dioxo-1-pyrimidinyl)-4-hydroxy-2-(hydroxymethyl)-3-oxolanyl] dihydrogen phosphate	LINK	0	2	N	N	1	0.0001	0	0	0	0		Acute Aquatic Toxicity: 1|Nonbiodegradable compounds: 1			S/PO3 groups: 4|Phosphoric acid: 1|alkyl esters of S or P: 1|Biodegradable compounds: 2|UNIFAC: 4|Phosphoric ester: 1|Filter82_pyridinium: 1|phosphor: 1|Reactive, unstable, toxic: 2|Nonbiodegradable c	0.248	19.3
681605675	[(2S,5S)-2-(5-fluoro-2,4-dioxo-1-pyrimidinyl)-4-hydroxy-5-(hydroxymethyl)-3-oxolanyl] dihydrogen phosphate	LINK	0	2	N	N	1	0.0001	0	0	0	0		Nonbiodegradable compounds: 1|Acute Aquatic Toxicity: 1			Reactive, unstable, toxic: 2|Nonbiodegradable compounds: 1|S/PO3 groups: 4|Phosphoric acid: 1|alkyl esters of S or P: 1|Biodegradable compounds: 2|UNIFAC: 4|Phosphoric ester: 1|Filter82_pyridinium: 1|	0.368	19.21
783362511	(6R)-3-[(2R,3R,4S,5R)-3,4-dihydroxy-5-(hydroxymethyl)-2-oxolanyl]-5-fluoro-6-hydroxy-1,6-dihydropyrimidin-2-one	LINK	0	2	N	N	1	0.0001	0	0	0	0					UNIFAC: 7|Skin sensitization: 1|Nonbiodegradable compounds: 1|Biodegradable compounds: 4	0.608	19.08
1467916210	D-Ribose 1-diphosphate	LINK	1	3	DR1P	3.1.3A1(rev)	1336	0.927	0	0	2	29	1468172245		0.255	1467897097	Phosphoric acid: 2|S/PO3 groups: 8|Biodegradable compounds: 2|di/triphosphate: 2|alkyl esters of S or P: 1|Nonbiodegradable compounds: 1|UNIFAC: 5|Reactive, unstable, toxic: 7|Phosphoric ester: 1|Skin
6339880	5-fluoro-1-[4-hydroxy-5-(hydroxymethyl)-2-oxolanyl]-4-(methylthio)-2-pyrimidinone	LINK	0	3	DC	2.7.8B1	1389	0.908	0	0	1	25	1467868402	Biodegradable compounds: 2	0.763	1467897097	Filter82_pyridinium: 1|Acute Aquatic Toxicity: 1|Nonbiodegradable compounds: 2|UNIFAC: 3
1468012320	5-Deoxyribose-1-phosphate	LINK	1	3	r1p	2.4.2A1(rev)	346	0.894	0	0	1	20	1467871323		0.233	320585	S/PO3 groups: 4|alkyl esters of S or P: 1|LD50_mo_oral: 1|Phosphoric ester: 1|Skin sensitization: 1|Nonbiodegradable compounds: 1|phosphor: 1|Reactive, unstable, toxic: 3|Biodegradable compounds: 2|UN
1467890527	Deoxyribonolactone	LINK	1	3	drib	2.7.8B1	555	0.692	0	0	1	50	1468172245		0.348	320585	Biodegradable compounds: 3|Reactive, unstable, toxic: 3|UNIFAC: 4|Acute Aquatic Toxicity: 1|Ester: 1	0.944	35.44
1467867163	RIB	LINK	1	3	rmn	2.7.8B1	2588	0.683	0	0	1	100	1467871323		0.305	5167500	hemiacetal: 1|Reactive, unstable, toxic: 1|Skin sensitization: 1|UNIFAC: 4|Biodegradable compounds: 4|Nonbiodegradable compounds: 1	0.888	34.49
1468012307	(2R,3R,4S,5R)-2-(5-fluoro-2-hydroxy-4-imino-1,4-dihydropyrimidin-1-yl)-5-methyloxolane-3,4-diol	LINK	1	3	CDP	1.17.4A1(rev)	2376	0.673	0	0	1	7	1467871323	Acute Aquatic Toxicity: 1|Nonbiodegradable compounds: 1	0.845	1467866276	Skin sensitization: 2|Nonbiodegradable compounds: 1|Genotoxic carcinogenicity, mutagenicity: 3|Biodegradable compounds: 2|UNIFAC: 2|Filter82_pyridinium: 1|aniline: 1	1	34
1467897007	Willardiine	LINK	1	3	DU	3.5.4A1(rev)	1522	0.589	0	0	1	20	1467868402		0.538	2382083	beta-carbonyl_quaternary_nitrogen: 1|Biodegradable compounds: 1|R16 beta carbonyl quaternary Nitrogen: 1|Filter82_pyridinium: 1|Reactive, unstable, toxic: 1	0.61	29.98
4359360	5-fluoro-1-[2-hydroxy-4-(hydroxymethyl)cyclopentyl]pyrimidine-2,4-dione	LINK	0	3	uri	3.5.4A1(rev)	1516	0.529	0	0	1	17	1467868402	Acute Aquatic Toxicity: 1|Nonbiodegradable compounds: 1	0.471	1468012285	Filter82_pyridinium: 1|UNIFAC: 2|Biodegradable compounds: 2
1468012263	aflburppa	LINK	1	3	CTL	3.5.3A2(rev)	1592	0.44	0	0	1	33	1467921491		0.316	1467926514	Reactive, unstable, toxic: 2|Alpha_Halo_Carbonyl: 1|Imine 3: 1|Idiosyncratic toxicity (RM formation): 2|Acute Aquatic Toxicity: 3|imine: 3|alpha halo carbonyl: 1|Biodegradable compounds: 1|UNIFAC: 6|P
1467873229	ara14l	LINK	1	3	uri	3.1.3A1(rev)	1675	0.368	0	0	1	17	1468155175		0.253	1467869376	Biodegradable compounds: 4|Reactive, unstable, toxic: 3|Acute Aquatic Toxicity: 1|Ester: 1|UNIFAC: 4
6299287	2,3-dihydroxypropyl 5-fluoro-2,4-dioxo-1H-pyrimidine-6-carboxylate	LINK	0	3	xan	1.1.1D1(rev)	1886	0.284	0	0	2	67	1468086012	Acute Aquatic Toxicity: 1|Nonbiodegradable compounds: 1	0.578	1467928724	UNIFAC: 4|Ester: 1|Biodegradable compounds: 3
1467871468	frmd	LINK	1	3	LACA	1.2.1D3	1982	0.273	0	0	1	17	1468107584		0.058	1467970852	Imine2: 1|Filter38_aldehyde: 1|UNIFAC: 2|acyclic C=N-H: 1|Reactive, unstable, toxic: 2|Imine 3: 1|aldehyde: 2|imine: 2|Biodegradable compounds: 1
3626787	4-amino-5-fluoro-1-methyl-2-pyrimidinone	LINK	0	3	3DMET: B00753	2.1.1A4(rev)	460	0.158	0	0	1	100	1467924466	Nonbiodegradable compounds: 1|Acute Aquatic Toxicity: 1	0.183	1468107584	Genotoxic carcinogenicity, mutagenicity: 3|aniline: 1|Filter82_pyridinium: 1|Skin sensitization: 2
1468032507	Chloraniformethan	LINK	1	3	N	N	1	0.0001	0	0	0	0	1468383341	Nonbiodegradable compounds: 2|Acute Aquatic Toxicity: 2	0.423	4756139	non_ring_acetal: 1|Skin sensitization: 2|Filter1_2_halo_ether: 6|alkyl halide: 6|Filter84_nitrogen_mustard: 6|Genotoxic carcinogenicity, mutagenicity: 5|Acute Aquatic Toxicity: 6|acyclic N-C-N: 1|gemi	0.63	19.02
6334762	2,4,5,6-tetrachloropyridine-3-carboxamide	LINK	0	3	N	N	1	0.0001	0	0	0	0	1468107584	Nonbiodegradable compounds: 4|Acute Aquatic Toxicity: 4	0.091	1467867595	Filter94_2_halo_pyridine: 2|2-chloropyridine: 2|Idiosyncratic toxicity (RM formation): 1|Nonbiodegradable compounds: 5|halo-pyridine,_-diazoles_and_-triazoles: 2|2halo_pyridine_5EWG: 1|4-halopyridine:	0.308	18.56
235057	N'-carbamoyl-N'-methyloxamide	LINK	0	3	N	N	1	0.0001	0	0	0	0	1468205025		0.333	1467907350	Skin sensitization: 2|Filter41_12_dicarbonyl: 1|Filter93_acetyl_urea: 1|Nonbiodegradable compounds: 1|1,2-dicarbonyl not in ring: 1|Oxalyl: 1|alpha_dicarbonyl: 1|Reactive, unstable, toxic: 1|diketo gr	1	18.24
1956480	2-oxo-2-phenylacetamide	LINK	0	3	N	N	1	0.0001	0	0	0	0	1468109910		0.266	1467867945	Reactive, unstable, toxic: 1|1,2-dicarbonyl not in ring: 1|Oxalyl: 1|alpha_dicarbonyl: 1|diketo group: 1|Ketone: 1|UNIFAC: 1|Filter41_12_dicarbonyl: 1	0.218	17.23
1937394	N-[3-(dimethylamino)propyl]formamide	LINK	0	3	N	N	1	0.0001	0	0	0	0	1468175591		0.296	1467928748	UNIFAC: 4|Aliphatic long chain: 2|Reactive, unstable, toxic: 1|Skin sensitization: 1|Nonbiodegradable compounds: 1|Unbranched chain: 1|aldehyde: 2|Filter38_aldehyde: 1|formate_formide: 1|Idiosyncratic	0.316	15.96
1467873411	DR1P	LINK	1	3	N	N	1	0.0001	0	0	0	0	1468172245		0.27	1467872331	Skin sensitization: 1|phosphor: 1|Nonbiodegradable compounds: 1|Biodegradable compounds: 2|S/PO3 groups: 4|alkyl esters of S or P: 1|LD50_mo_oral: 1|Reactive, unstable, toxic: 3|Phosphoric ester: 1|UN	0.037	15.59
1467867132	PRPP	LINK	1	3	N	N	1	0.0001	0	0	0	0	1467871323		0.192	320585	Reactive, unstable, toxic: 9|phosphor: 3|UNIFAC: 2|S/PO3 groups: 12|Skin sensitization: 1|LD50_mo_oral: 3|Nonbiodegradable compounds: 1|alkyl esters of S or P: 2|Phosphoric ester: 2	0.113	15.43
6284190	S-(trifluoromethylsulfanyl) carbamothioate	LINK	0	3	N	N	1	0.0001	0	0	0	0	1468107584		0.043	1467933886	UNIFAC: 3|Reactive, unstable, toxic: 9|Skin sensitization: 1|Potential electrophilic agents: 1|Hetero_hetero: 1|disulfide_acyclic: 1|reactive_carbonyls: 1|thioester: 1|Filter56_SS_bond: 1|Nonbiodegrad	0.529	15.31
1467968602	Azacitidine	LINK	1	3	N	N	1	0.0001	0	0	0	0	1467968602		1	1467968602	Biodegradable compounds: 3|Genotoxic carcinogenicity, mutagenicity: 3|aniline: 1|UNIFAC: 3|Filter82_pyridinium: 1|Skin sensitization: 2|Nonbiodegradable compounds: 4	0.365	15.03
2988944	N-[1-[(2R,4S,5R)-4-hydroxy-5-(hydroxymethyl)-2-oxolanyl]-2-oxo-4-pyrimidinyl]-4-methoxybenzamide	LINK	0	3	N	N	1	0.0001	0	0	0	0	1467928737		0.827	1468172245	Biodegradable compounds: 2|Skin sensitization: 4|Filter82_pyridinium: 1|UNIFAC: 3|Nonbiodegradable compounds: 1|Genotoxic carcinogenicity, mutagenicity: 1	1	14.69
1467869376	uri	LINK	1	3	N	N	1	0.0001	0	0	0	0	1467868402		0.852	1467869376	Filter82_pyridinium: 1|Biodegradable compounds: 3|Nonbiodegradable compounds: 1|UNIFAC: 3	0.357	14.57
19290	1-[3,4-dihydroxy-5-(hydroxymethyl)-2-oxolanyl]-5-hydroxypyrimidine-2,4-dione	LINK	0	3	N	N	1	0.0001	0	0	0	0	1467868402		0.783	1467869376	Filter82_pyridinium: 1|Nonbiodegradable compounds: 1|Biodegradable compounds: 4|UNIFAC: 3	0.346	13.72
6302909	2-[[5-(2,2-dimethyl-1,3-dioxolan-4-yl)-2,2-dimethyl-3a,5,6,6a-tetrahydrofuro[2,3-d][1,3]dioxol-6-yl]oxy]-5-(hydroxymethyl)oxolane-3,4-diol	LINK	0	3	N	N	1	0.0001	0	0	0	0	1467923451		0.485	1467866715	Nonbiodegradable compounds: 7|acetal: 2|Biodegradable compounds: 3|Reactive, unstable, toxic: 6|UNIFAC: 4|Skin sensitization: 4	0.737	13.37
6282511	3-[(4-bromophenyl)carbamoylamino]benzamide	LINK	0	3	N	N	1	0.0001	0	0	0	0	1467928724	Acute Aquatic Toxicity: 1	0.151	1467930714	Filter9_metal: 1|aryl bromide: 2|UNIFAC: 1|Genotoxic carcinogenicity, mutagenicity: 2|Skin sensitization: 8|Non-genotoxic carcinogenicity: 1	0.462	12.91
6290751	2-(hydroxymethyl)-5-[(2,2,7,7-tetramethyl-5,5a,8a,8b-tetrahydro-3aH-di[1,3]dioxolo[4,5-a:5',4'-d]pyran-5-yl)methoxy]oxolane-3,4-diol	LINK	0	3	N	N	1	0.0001	0	0	0	0	1467923451		0.411	1467866715	Biodegradable compounds: 3|Nonbiodegradable compounds: 7|Skin sensitization: 4|Reactive, unstable, toxic: 6|acetal: 2|UNIFAC: 4	0.739	12.72
1468073776	N(6)-methyladenosine	LINK	0	3	N	N	1	0.0001	0	0	0	0	1467868376		0.985	1467868376	Biodegradable compounds: 3|Skin sensitization: 2|Nonbiodegradable compounds: 1|Genotoxic carcinogenicity, mutagenicity: 4|UNIFAC: 4	0.8	10.9
1467872331	DA	LINK	1	3	N	N	1	0.0001	0	0	0	0	1468100787		0.988	1467872331	Skin sensitization: 2|Chelating agents: 1|UNIFAC: 2|Genotoxic carcinogenicity, mutagenicity: 3|Nonbiodegradable compounds: 1|Biodegradable compounds: 2|aniline: 1	0.442	9.72
3011108	6,7-dimethyl-3-oxo-4-[(2S,3S,4R)-2,3,4,5-tetrahydroxypentyl]quinoxaline-2-carboxamide	LINK	0	3	N	N	1	0.0001	0	0	0	0	1467871323		0.289	3010322	Biodegradable compounds: 4|Filter82_pyridinium: 1|UNIFAC: 5	0.511	9.49
4276630	3-[3,4-dihydroxy-5-(hydroxymethyl)-2-oxolanyl]-7H-pyrrolo[2,3-d]pyrimidin-4-one	LINK	0	3	N	N	1	0.0001	0	0	0	0	3254574		0.629	1467868376	Biodegradable compounds: 3|Filter82_pyridinium: 1|UNIFAC: 3|Nonbiodegradable compounds: 1	0.4	9.01
6257054	3-formamidopropanoic acid	LINK	0	3	N	N	1	0.0001	0	0	0	0	1468204617		0.303	1467870954	Idiosyncratic toxicity (RM formation): 2|Biodegradable compounds: 1|UNIFAC: 3|aldehyde: 2|Aliphatic long chain: 1|formate_formide: 1|Reactive, unstable, toxic: 1|Filter38_aldehyde: 1	0.327	7.38
1468689788	Zamix	LINK	1	3	N	N	1	0.0001	0	0	0	0	1467923441		0.315	47221	Idiosyncratic toxicity (RM formation): 2|UNIFAC: 1|aromatic NO2: 2|Reactive, unstable, toxic: 2|Genotoxic carcinogenicity, mutagenicity: 6|Nonbiodegradable compounds: 4|Nitrosone_not_nitro: 2	0.378	6.59
6289850	ethyl 1-[3,4-dihydroxy-5-(hydroxymethyl)tetrahydrofuran-2-yl]-5-fluoro-imidazole-4-carboxylate	LINK	0	3	N	N	1	0.0001	0	0	0	0	1468229847	Acute Aquatic Toxicity: 1|Nonbiodegradable compounds: 1	0.709	1467870385	UNIFAC: 4|Ester: 1|Reactive, unstable, toxic: 3|Biodegradable compounds: 4|Nonbiodegradable compounds: 1	0.2	4.77
3263975	9-phenanthrenecarboxamide	LINK	0	3	N	N	1	0.0001	0	0	0	0	1468611631		0.373	4705042	(poly(azo(phenanthrene)): 1|Polynuclear_Aromatic_2: 1|UNIFAC: 1|Genotoxic carcinogenicity, mutagenicity: 3|Reactive, unstable, toxic: 1|multiple aromatic rings: 2|Filter63_polyaromatic: 1|Skin sensiti
4376063	2-(hydroxymethyl)-5-[6-[(phenylmethyl)amino]-9-purinyl]-3-oxolanol	LINK	0	3	N	N	1	0.0001	0	0	0	0	1468100787		0.988	1468384732	Skin sensitization: 2|Nonbiodegradable compounds: 1|Genotoxic carcinogenicity, mutagenicity: 1|Biodegradable compounds: 2|UNIFAC: 3
6288923	9-[3,4-dihydroxy-5-(hydroxymethyl)-2-oxolanyl]-2-purinecarboxamide	LINK	0	3	N	N	1	0.0001	0	0	0	0	1467868376		0.918	1467883069	Biodegradable compounds: 3|Nonbiodegradable compounds: 1|UNIFAC: 4
6291088	3-[3,4-dihydroxy-5-(hydroxymethyl)-2-oxolanyl]-5-fluoro-4-imidazolecarboxamide	LINK	0	3	N	N	1	0.0001	0	0	0	0	1467868376	Acute Aquatic Toxicity: 1|Nonbiodegradable compounds: 1	0.582	33245	Reactive, unstable, toxic: 3|UNIFAC: 4|Biodegradable compounds: 3|Nonbiodegradable compounds: 1
2134518	6-amino-3-[(2R,3R,4S,5R)-3,4-dihydroxy-5-(hydroxymethyl)-2-oxolanyl]-1,4-dihydro-1,3,5-triazin-2-one	LINK	0	3	N	N	1	0.0001	0	0	0	0	1467968602		0.669	1467968602	Nonbiodegradable compounds: 1|Skin sensitization: 2|UNIFAC: 5|Biodegradable compounds: 3|Reactive, unstable, toxic: 1
6331076	1-[3,4-dihydroxy-5-(hydroxymethyl)-2-oxolanyl]-1,2,4-triazole-3-carboxylic acid	LINK	0	3	N	N	1	0.0001	0	0	0	0	1468096895		0.921	1467968640	Nonbiodegradable compounds: 1|UNIFAC: 5|Biodegradable compounds: 4|Idiosyncratic toxicity (RM formation): 1	0.429
3424418	S-[2-(4-acetylanilino)-2-oxo-ethyl] carbamothioate	LINK	0	3	N	N	1	0.0001	0	0	0	0	1468387639		0.238	3424451	Genotoxic carcinogenicity, mutagenicity: 1|Ketone: 1|Acute Aquatic Toxicity: 1|Skin sensitization: 6|Reactive, unstable, toxic: 1|reactive_carbonyls: 1|thioester: 1|Potential electrophilic agents: 1|F
44980643	1-[3,4-dihydroxy-5-(hydroxymethyl)-2-oxolanyl]pyrazole-3,5-dicarbothioamide	LINK	0	3	N	N	1	0.0001	0	0	0	0	1468096895		0.48	17417	Non-genotoxic carcinogenicity: 2|Reactive, unstable, toxic: 10|Nonbiodegradable compounds: 1|Thiocarbonyl group: 2|Thiocarbonyl_group: 2|Biodegradable compounds: 3|UNIFAC: 3
6330955	1-[3,4-dihydroxy-5-(hydroxymethyl)-2-oxolanyl]-5-methoxy-4-imidazolecarboxamide	LINK	0	3	N	N	1	0.0001	0	0	0	0	1467868376		0.698	1467870385	UNIFAC: 5|Biodegradable compounds: 3|Nonbiodegradable compounds: 1
1467869312	ins	LINK	1	3	N	N	1	0.0001	0	0	0	0	1467868376		0.762	1467934647	Biodegradable compounds: 3|Nonbiodegradable compounds: 1|UNIFAC: 3
6313340	3-[3,4-dihydroxy-5-(hydroxymethyl)-2-oxolanyl]-[1,2,4]triazolo[1,5-a][1,3,5]triazine-5,7-dione	LINK	0	3	N	N	1	0.0001	0	0	0	0	1467968602		0.531	1467934647	Nonbiodegradable compounds: 4|UNIFAC: 3|Biodegradable compounds: 3
4133903	S-butyl carbamothioate	LINK	0	3	N	N	1	0.0001	0	0	0	0	1467921898		0.132	3424451	Reactive, unstable, toxic: 1|Acute Aquatic Toxicity: 1|Aliphatic long chain: 1|reactive_carbonyls: 1|thioester: 1|Filter81_Thiocarbamate: 1|UNIFAC: 2
6334486	2-oxo-4-(trifluoromethyl)-1H-pyridine-3-carboxamide	LINK	0	3	N	N	1	0.0001	0	0	0	0	1468095052		0.182	1467867595	Potential electrophilic agents: 1|Acute Aquatic Toxicity: 6|Nonbiodegradable compounds: 2|Reactive, unstable, toxic: 3|UNIFAC: 3
6329858	1-[4-hydroxy-5-(hydroxymethyl)-2-oxolanyl]pyrrole-2,4-dicarboxamide	LINK	0	3	N	N	1	0.0001	0	0	0	0	1467868402		0.6	1467897097	Nonbiodegradable compounds: 1|UNIFAC: 4|Biodegradable compounds: 2
6310950	2-(2-methylpropanoylamino)benzamide	LINK	0	3	N	N	1	0.0001	0	0	0	0	1467928771		0.472	4942404	Genotoxic carcinogenicity, mutagenicity: 1|Nonbiodegradable compounds: 1|UNIFAC: 1|Skin sensitization: 4|Potential electrophilic agents: 1
1467866960	ura	LINK	1	3	N	N	1	0.0001	0	0	0	0	1467928724		0.824	1467866960
1467883705	drib	LINK	1	3	N	N	1	0.0001	0	0	0	0	1467871323		0.28	1467872331	Reactive, unstable, toxic: 1|UNIFAC: 3|hemiacetal: 1|Skin sensitization: 1|Nonbiodegradable compounds: 1|Biodegradable compounds: 3
93339106	(2E)-3-amino-2-methoxyimino-3-oxopropanoic acid methyl ester	LINK	0	3	N	N	1	0.0001	0	0	0	0	1467880291		0.122	5097072	imines_(not_ring): 1|Biodegradable compounds: 1|Oxygen-nitrogen single bond: 1|Reactive, unstable, toxic: 4|Ester: 1|UNIFAC: 2|acyclic NO not nitro: 1|Oxime: 1|imine: 1|Nitrosone_not_nitro: 1|beta-ket
4110314	4-chloropyridine-2-carboxamide	LINK	0	3	N	N	1	0.0001	0	0	0	0	1469436823	Acute Aquatic Toxicity: 1|Nonbiodegradable compounds: 1	0.03	1467967595	4-halopyridine: 1|UNIFAC: 1|Reactive, unstable, toxic: 3|Acute Aquatic Toxicity: 1|Nonbiodegradable compounds: 2
4602707	2-(3-carbamoylphenoxy)ethyl acetate	LINK	0	3	N	N	1	0.0001	0	0	0	0	7428482		0.102	1467880291	Biodegradable compounds: 1|aliphatic ester, not lactones: 1|Reactive, unstable, toxic: 1|Aliphatic long chain: 1|UNIFAC: 4|Ester: 1
6270242	2-(ethylthio)-5-(hydroxymethyl)oxolane-3,4-diol	LINK	0	3	N	N	1	0.0001	0	0	0	0	1467922365		0.338	1468360955	Nonbiodegradable compounds: 1|Biodegradable compounds: 3|UNIFAC: 4
1467867595	NAM	LINK	1	3	N	N	1	0.0001	0	0	0	0	1467885048		0.269	1467867595	Nonbiodegradable compounds: 1|UNIFAC: 1
1467885048	Pyrazinamide	LINK	1	3	N	N	1	0.0001	0	0	0	0	1467885048		1	1467867595	UNIFAC: 1
8476734	4-[5-[(4-chlorophenyl)methylthio]-1-tetrazolyl]benzamide	LINK	0	3	N	N	1	0.0001	0	0	0	0	1468109766	Nonbiodegradable compounds: 1|Acute Aquatic Toxicity: 1	0.226	47221	Acute Aquatic Toxicity: 1|Non-genotoxic carcinogenicity: 1|Nonbiodegradable compounds: 1|Skin sensitization: 1|UNIFAC: 2
110694	2-methylbenzamide	LINK	0	3	N	N	1	0.0001	0	0	0	0	1467923441		0.5	647431	UNIFAC: 1
126820997	1H-indole-5-carboxamide	LINK	0	3	N	N	1	0.0001	0	0	0	0	1468611631		0.729	4762136	UNIFAC: 1
1467885001	Picolinamide	LINK	1	3	N	N	1	0.0001	0	0	0	0	1467885048		0.333	10907	UNIFAC: 1|Nonbiodegradable compounds: 1
2152589	5-fluoro-1H-pyrimidin-2-one	LINK	0	3	N	N	1	0.0001	0	0	0	0	1468089357	Nonbiodegradable compounds: 1|Acute Aquatic Toxicity: 1	0.09	1468107584
6333451	6-methoxypyridine-2,3-dicarboxamide	LINK	0	3	N	N	1	0.0001	0	0	0	0	1468205025		0.13	1467867595	Nonbiodegradable compounds: 1|UNIFAC: 3
6333127	6-methylpyridine-2,3-dicarboxamide	LINK	0	3	N	N	1	0.0001	0	0	0	0	1468205025		0.138	1467867595	Nonbiodegradable compounds: 1|UNIFAC: 2
3630714	5,5-dimethyl-6H-benzo[c]acridine-7-carboxamide	LINK	0	3	N	N	1	0.0001	0	0	0	0	1467871291		0.301	4762433	Nonbiodegradable compounds: 1|UNIFAC: 1
6308058	6-methoxy-1,3-benzothiazole-2-carboxamide	LINK	0	3	N	N	1	0.0001	0	0	0	0	1468239270		0.111	4704443	UNIFAC: 2|Skin sensitization: 1
6331565	5-phenylisoxazole-3-carboxamide	LINK	0	3	N	N	1	0.0001	0	0	0	0	1467923441		0.181	1468037355	UNIFAC: 1
1467867313	CH3OH	LINK	1	3	N	N	1	0.0001	0	0	0	0	1467924466	Biodegradable compounds: 1	0.077	1467865967	UNIFAC: 1
1467879774	HCN	LINK	1	3	N	N	1	0.0001	0	0	0	0	1467924899		0.083		Biodegradable compounds: 1
191245016	6-amino-5-fluoro-3-methyl-4,5-dihydropyrimidin-2-one	LINK	0	3	N	N	1	0.0001	0	0	0	0					Acute Aquatic Toxicity: 2|UNIFAC: 1|Reactive, unstable, toxic: 2|Idiosyncratic toxicity (RM formation): 1
284046642	(4R,5S)-6-amino-5-fluoro-4-hydroxy-3-methyl-4,5-dihydropyrimidin-2-one	LINK	0	3	N	N	1	0.0001	0	0	0	0					Idiosyncratic toxicity (RM formation): 1|UNIFAC: 3|Reactive, unstable, toxic: 2|Acute Aquatic Toxicity: 2|Biodegradable compounds: 1
390661636	4-amino-1-ethyl-5-fluoro-2-pyrimidinone	LINK	0	3	N	N	1	0.0001	0	0	0	0		Nonbiodegradable compounds: 1|Acute Aquatic Toxicity: 1			aniline: 1|Skin sensitization: 2|Filter82_pyridinium: 1|Genotoxic carcinogenicity, mutagenicity: 3
1109236999	6-amino-5-fluoro-3-methyl-1,6-dihydropyrimidin-2-one	LINK	0	3	N	N	1	0.0001	0	0	0	0					UNIFAC: 7|Reactive, unstable, toxic: 1|Skin sensitization: 1
1467866414	fald	LINK	1	3	N	N	1	0.0001	0	0	0	0				1467871372	Reactive, unstable, toxic: 2|Potential electrophilic agents: 1|Biodegradable compounds: 1|aldehyde: 1|Skin sensitization: 2|Non-genotoxic carcinogenicity: 1
1468159487	1-methylcytosine	LINK	0	3	N	N	1	0.0001	0	0	0	0					Genotoxic carcinogenicity, mutagenicity: 3|aniline: 1|Skin sensitization: 2|Filter82_pyridinium: 1
4275950	1-[2-hydroxy-4-(hydroxymethyl)cyclopentyl]pyrimidine-2,4-dione	LINK	0	3	N	N	1	0.0001	0	0	0	0					Filter82_pyridinium: 1|UNIFAC: 2|Biodegradable compounds: 2
97162890	5-fluoro-1-[(1S,3R)-3-(hydroxymethyl)cyclopentyl]pyrimidine-2,4-dione	LINK	0	3	N	N	1	0.0001	0	0	0	0		Nonbiodegradable compounds: 1|Acute Aquatic Toxicity: 1			UNIFAC: 1|Filter82_pyridinium: 1|Biodegradable compounds: 1
2579598	5-fluoro-2,4-dioxo-1H-pyrimidine-6-carbaldehyde	LINK	0	3	N	N	1	0.0001	0	0	0	0		Nonbiodegradable compounds: 1|Acute Aquatic Toxicity: 1			UNIFAC: 1|Potential electrophilic agents: 1|Non-genotoxic carcinogenicity: 1|Biodegradable compounds: 1|aldehyde: 5|Skin sensitization: 3|Reactive, unstable, toxic: 3|Filter38_aldehyde: 1|keto_def_het	0.544
6403364	2,3-dihydroxypropyl 2,4-dioxo-1H-pyrimidine-6-carboxylate	LINK	0	3	N	N	1	0.0001	0	0	0	0					Ester: 1|UNIFAC: 4|Biodegradable compounds: 3	1
122608888	2,3-dihydroxypropyl formate	LINK	0	3	N	N	1	0.0001	0	0	0	0					Biodegradable compounds: 2|aldehyde: 2|formate_formide: 1|Filter38_aldehyde: 1|Reactive, unstable, toxic: 1|UNIFAC: 4
4595675	5-fluoro-6-(methylthio)-1H-pyrimidin-2-one	LINK	0	3	N	N	1	0.0001	0	0	0	0		Nonbiodegradable compounds: 1|Acute Aquatic Toxicity: 1			UNIFAC: 1
51969235	5-fluoro-1-[4-hydroxy-5-(hydroxymethyl)-2-oxolanyl]-4-sulfanylidene-2-pyrimidinone	LINK	0	3	N	N	1	0.0001	0	0	0	0		Nonbiodegradable compounds: 1|Acute Aquatic Toxicity: 1			Filter82_pyridinium: 1|Biodegradable compounds: 2|UNIFAC: 2|Nonbiodegradable compounds: 1|Thiocarbonyl group: 1	0.432
400046896	1-[(2R,3R,4S,5R)-3,4-dihydroxy-5-(hydroxymethyl)-2-oxolanyl]-5-fluoro-4-(methylthio)-2-pyrimidinone	LINK	0	3	N	N	1	0.0001	0	0	0	0		Nonbiodegradable compounds: 1|Acute Aquatic Toxicity: 1			UNIFAC: 4|Biodegradable compounds: 3|Filter82_pyridinium: 1|Nonbiodegradable compounds: 1	0.385
5163703	9-[3,4-dihydroxy-5-(hydroxymethyl)-2-oxolanyl]-1-[2-(5H-purin-6-ylthio)ethyl]-6-purinethione	LINK	0	3	N	N	1	0.0001	0	0	0	0					Thiocarbonyl group: 1|Biodegradable compounds: 3|Filter82_pyridinium: 1|Nonbiodegradable compounds: 1|Reactive, unstable, toxic: 2|UNIFAC: 4	0.42
1468118680	N-[(9-beta-D-ribofuranosyl-2-methylthiopurin-6-yl)carbamoyl]threonine	LINK	0	3	N	N	1	0.0001	0	0	0	0					Skin sensitization: 5|Idiosyncratic toxicity (RM formation): 1|UNIFAC: 8|Biodegradable compounds: 6|Genotoxic carcinogenicity, mutagenicity: 1|Nonbiodegradable compounds: 1|Reactive, unstable, toxic:	0.186
1468122320	uridin-5-yloxyacetic acid	LINK	0	3	N	N	1	0.0001	0	0	0	0					Filter82_pyridinium: 1|Biodegradable compounds: 4|Nonbiodegradable compounds: 1|Idiosyncratic toxicity (RM formation): 1|UNIFAC: 6	0.349
1468209029	beta-D-Araf-(1->2)-alpha-D-Araf-(1->5)-[beta-D-Araf-(1->2)-alpha-D-Araf-(1->3)]-alpha-D-Araf-(1->5)-alpha-D-Araf-OMe	LINK	0	3	N	N	1	0.0001	0	0	0	0					Nonbiodegradable compounds: 12|acetal: 6|UNIFAC: 16|Biodegradable compounds: 13|Reactive, unstable, toxic: 12|Skin sensitization: 6
1468209037	beta-D-Araf-(1->2)-alpha-D-Araf-(1->5)-alpha-D-Araf-(1->5)-alpha-D-Araf-OMe	LINK	0	3	N	N	1	0.0001	0	0	0	0					Skin sensitization: 4|Nonbiodegradable compounds: 8|acetal: 4|UNIFAC: 12|Biodegradable compounds: 9|Reactive, unstable, toxic: 8
1468209045	beta-D-Araf-(1->2)-alpha-D-Araf-(1->3)-alpha-D-Araf-(1->5)-alpha-D-Araf-OMe	LINK	0	3	N	N	1	0.0001	0	0	0	0					Biodegradable compounds: 9|Reactive, unstable, toxic: 8|Skin sensitization: 4|Nonbiodegradable compounds: 8|acetal: 4|UNIFAC: 11
1468218750	alpha-L-Araf-(1->3)-beta-D-Galp-(1->6)-D-Galp	LINK	0	3	N	N	1	0.0001	0	0	0	0					acetal: 2|Skin sensitization: 3|Reactive, unstable, toxic: 5|Nonbiodegradable compounds: 5|UNIFAC: 11|hemiacetal: 1|Biodegradable compounds: 10
1468222014	5-O-(trans-feruloyl)-L-arabinofuranose	LINK	0	3	N	N	1	0.0001	0	0	0	0					Chelating agents: 1|UNIFAC: 8|Non-genotoxic carcinogenicity: 1|Ester: 1|Acute Aquatic Toxicity: 2|hemiacetal: 1|Michael acceptor: 1|Biodegradable compounds: 5|alpha beta-unsaturated ketones; center of
1468234468	lysidine	LINK	0	3	N	N	1	0.0001	0	0	0	0					Nonbiodegradable compounds: 1|UNIFAC: 6|Reactive, unstable, toxic: 1|Biodegradable compounds: 4|Filter82_pyridinium: 1|Aliphatic long chain: 2|amino acid: 1|Genotoxic carcinogenicity, mutagenicity: 1|
1468234524	5-carboxymethylaminomethyl-2-thiouridine	LINK	0	3	N	N	1	0.0001	0	0	0	0					Thiocarbonyl group: 1|Biodegradable compounds: 5|Filter82_pyridinium: 1|Nonbiodegradable compounds: 1|Idiosyncratic toxicity (RM formation): 1|UNIFAC: 6
1468263054	myricetin-3-O-arabinofuranoside	LINK	0	3	N	N	1	0.0001	0	0	0	0					Skin sensitization: 13|2,3,4trihydroxyphenyl: 1|Filter14_thio_oxopyrylium_salt: 1|Reactive, unstable, toxic: 10|Chelating agents: 2|PAINS compounds: 2|Nonbiodegradable compounds: 6|catechol: 2|Idiosyn
1468267574	6-O-methylinosine	LINK	0	3	N	N	1	0.0001	0	0	0	0					UNIFAC: 4|Biodegradable compounds: 3|Nonbiodegradable compounds: 1
1468631685	Neryl glucoside	LINK	1	3	N	N	1	0.0001	0	0	0	0					acetal: 1|isolated alkene: 2|Nonbiodegradable compounds: 2|Skin sensitization: 1|Reactive, unstable, toxic: 2|Genotoxic carcinogenicity, mutagenicity: 1|Biodegradable compounds: 4|UNIFAC: 9
1468642219	2-O-(4-O-Methyl-a-D-glucopyranuronosyl)-D-xylose	LINK	1	3	N	N	1	0.0001	0	0	0	0					Biodegradable compounds: 6|UNIFAC: 8|acetal: 1|Nonbiodegradable compounds: 4|Skin sensitization: 2|hemiacetal: 1|Idiosyncratic toxicity (RM formation): 1|Reactive, unstable, toxic: 3
1468648217	1-O-E-Cinnamoyl-(6-arabinosylglucose)	LINK	1	3	N	N	1	0.0001	0	0	0	0					phenylethene: 1|Genotoxic carcinogenicity, mutagenicity: 1|UNIFAC: 11|Potential electrophilic agents: 2|acetal: 2|Nonbiodegradable compounds: 3|Skin sensitization: 6|Ester: 1|Michael acceptor: 1|React
1468694622	Quinquenoside III	LINK	1	3	N	N	1	0.0001	0	0	0	0					aliphatic ester, not lactones: 1|Biodegradable compounds: 12|isolated alkene: 1|acetal: 3|UNIFAC: 15|Reactive, unstable, toxic: 7|saponin: 1|Skin sensitization: 3|Ester: 1|Nonbiodegradable compounds:
1468772541	Kafrp	LINK	1	3	N	N	1	0.0001	0	0	0	0					Nonbiodegradable compounds: 2|acetal: 2|Biodegradable compounds: 8|UNIFAC: 6|Reactive, unstable, toxic: 4|Skin sensitization: 3|Filter14_thio_oxopyrylium_salt: 1
1468772956	Eugenol O-[a-L-Arabinofuranosyl-(1-&gt;6)-b-D-glucopyranoside]	LINK	1	3	N	N	1	0.0001	0	0	0	0					isolated alkene: 1|Ethene: 1|terminal vinyl: 1|Nonbiodegradable compounds: 4|acetal: 2|Biodegradable compounds: 6|UNIFAC: 10|Reactive, unstable, toxic: 3|Skin sensitization: 4
1468793081	5-O-beta-D-Xylopyranosyl-L-arabinose	LINK	1	3	N	N	1	0.0001	0	0	0	0					acetal: 1|Biodegradable compounds: 6|UNIFAC: 8|Reactive, unstable, toxic: 3|Skin sensitization: 2|hemiacetal: 1|Nonbiodegradable compounds: 3
1468806002	3-O-alpha-D-Glucopyranuronosyl-D-xylose	LINK	1	3	N	N	1	0.0001	0	0	0	0					Reactive, unstable, toxic: 4|Skin sensitization: 2|hemiacetal: 1|Nonbiodegradable compounds: 3|acetal: 1|Biodegradable compounds: 7|Idiosyncratic toxicity (RM formation): 1|UNIFAC: 8
1468807457	a-L-Arabinofuranosyl-(1-&gt;2)-[a-D-mannopyranosyl-(1-&gt;6)]-D-mannose	LINK	1	3	N	N	1	0.0001	0	0	0	0					UNIFAC: 11|Reactive, unstable, toxic: 5|Skin sensitization: 3|hemiacetal: 1|Nonbiodegradable compounds: 5|acetal: 2|Biodegradable compounds: 10
1468808553	3-O-(4-O-Methyl-a-D-glucopyranuronosyl)-L-arabinose	LINK	1	3	N	N	1	0.0001	0	0	0	0					acetal: 1|Biodegradable compounds: 6|UNIFAC: 8|Reactive, unstable, toxic: 3|Skin sensitization: 2|hemiacetal: 1|Idiosyncratic toxicity (RM formation): 1|Nonbiodegradable compounds: 4
1468823472	Stipuleanoside R2	LINK	1	3	N	N	1	0.0001	0	0	0	0					saponin: 1|Ester: 1|UNIFAC: 17|Reactive, unstable, toxic: 10|Skin sensitization: 4|Idiosyncratic toxicity (RM formation): 1|Nonbiodegradable compounds: 7|acetal: 4|isolated alkene: 1|Biodegradable com
231034	N-propylformamide	LINK	0	3	N	N	1	0.0001	0	0	0	0					aldehyde: 2|Idiosyncratic toxicity (RM formation): 1|Aliphatic long chain: 1|Filter38_aldehyde: 1|formate_formide: 1|Reactive, unstable, toxic: 1|UNIFAC: 1|Unbranched chain: 1
292802	N-formylformamide	LINK	0	3	N	N	1	0.0001	0	0	0	0					Reactive, unstable, toxic: 2|aldehyde: 4|Idiosyncratic toxicity (RM formation): 2|Filter38_aldehyde: 2|formate_formide: 2
687648	acetyl cyanide	LINK	0	3	N	N	1	0.0001	0	0	0	0					Biodegradable compounds: 1|R27 Acyl cyanides: 1|UNIFAC: 2|Reactive, unstable, toxic: 2|acyl_cyanide: 1|Nonbiodegradable compounds: 1|Ketone: 1
690128	N-(2-hydroxyethyl)formamide	LINK	0	3	N	N	1	0.0001	0	0	0	0					Filter38_aldehyde: 1|formate_formide: 1|Unbranched chain: 1|Biodegradable compounds: 1|UNIFAC: 2|Aliphatic long chain: 1|aldehyde: 2|Idiosyncratic toxicity (RM formation): 1|Reactive, unstable, toxic:
1928145	2-oxopropanamide	LINK	0	3	N	N	1	0.0001	0	0	0	0					Oxalyl: 1|alpha_dicarbonyl: 1|Nonbiodegradable compounds: 1|diketo group: 1|Ketone: 1|Filter41_12_dicarbonyl: 1|UNIFAC: 3|1,2-dicarbonyl not in ring: 1|Reactive, unstable, toxic: 3
3376785	2-aminoquinoline-4-carboxamide	LINK	0	3	N	N	1	0.0001	0	0	0	0				1468037355	aniline: 1|Nonbiodegradable compounds: 1|UNIFAC: 1|Genotoxic carcinogenicity, mutagenicity: 3|Skin sensitization: 2
3424451	S-[2-oxo-2-(6-quinolylamino)ethyl] carbamothioate	LINK	0	3	N	N	1	0.0001	0	0	0	0				3424451	Reactive, unstable, toxic: 1|reactive_carbonyls: 1|thioester: 1|Potential electrophilic agents: 1|Filter81_Thiocarbamate: 1|UNIFAC: 2|Genotoxic carcinogenicity, mutagenicity: 1|Acute Aquatic Toxicity:
3729468	N-hydroxyformamide	LINK	0	3	N	N	1	0.0001	0	0	0	0					UNIFAC: 1|acyclic NO not nitro: 1|aldehyde: 2|Filter38_aldehyde: 1|Nitrosone_not_nitro: 1|Reactive, unstable, toxic: 3|hydroxamate_warhead: 1|Genotoxic carcinogenicity, mutagenicity: 1|Oxygen-nitrogen
5479281	aminomethanediol	LINK	0	3	N	N	1	0.0001	0	0	0	0					Skin sensitization: 1|non_ring_acetal: 3|het-C-het not in ring: 3|Biodegradable compounds: 2|UNIFAC: 4
6257087	N-(3-formamidopropyl)formamide	LINK	0	3	N	N	1	0.0001	0	0	0	0				1467928748	Reactive, unstable, toxic: 2|Filter38_aldehyde: 2|Unbranched chain: 4|Idiosyncratic toxicity (RM formation): 2|UNIFAC: 2|aldehyde: 4|Aliphatic long chain: 4|formate_formide: 2
6272791	N-(2,5-dioxopyrrolidin-3-yl)formamide	LINK	0	3	N	N	1	0.0001	0	0	0	0				1467870954	aldehyde: 2|UNIFAC: 1|phthalimide: 1|formate_formide: 1|Filter38_aldehyde: 1|Skin sensitization: 2|Reactive, unstable, toxic: 1|Idiosyncratic toxicity (RM formation): 1|Biodegradable compounds: 1
6294283	N-formyl-2-hydroxy-2-isopropyl-3-methyl-butanamide	LINK	0	3	N	N	1	0.0001	0	0	0	0				726003	Skin sensitization: 1|Biodegradable compounds: 1|Idiosyncratic toxicity (RM formation): 1|Nonbiodegradable compounds: 3|aldehyde: 2|Reactive, unstable, toxic: 1|UNIFAC: 1|formate_formide: 1|Filter38_a
6332959	4-amino-1,2,5-oxadiazole-3-carboxamide	LINK	0	3	N	N	1	0.0001	0	0	0	0				1467930756	UNIFAC: 1|aniline: 1|Genotoxic carcinogenicity, mutagenicity: 3|Skin sensitization: 2
6333072	6-bromo-1,3-benzothiazole-2-carboxamide	LINK	0	3	N	N	1	0.0001	0	0	0	0		Acute Aquatic Toxicity: 1		4704443	Skin sensitization: 1|Non-genotoxic carcinogenicity: 1|UNIFAC: 1|Filter9_metal: 1|aryl bromide: 2
60533728	aminomethanol	LINK	0	3	N	N	1	0.0001	0	0	0	0		Biodegradable compounds: 1			Non-genotoxic carcinogenicity: 1|het-C-het not in ring: 1|UNIFAC: 3|Skin sensitization: 2|Genotoxic carcinogenicity, mutagenicity: 1|non_ring_CH2O_acetal: 1
63166894	UID:63166894	LINK	0	3	N	N	1	0.0001	0	0	0	0					Oxygen-nitrogen single bond: 1|Reactive, unstable, toxic: 4|imine: 2|hydrazine: 1|Genotoxic carcinogenicity, mutagenicity: 1|acyclic N-,=N and not N bound to carbonyl or sulfo: 1
96726194	N'-(aminomethyl)ethane-1,2-diamine	LINK	0	3	N	N	1	0.0001	0	0	0	0					Aliphatic long chain: 1|Skin sensitization: 4|non_ring_CH2O_acetal: 1|acyclic N-C-N: 1|het-C-het not in ring: 1|Reactive, unstable, toxic: 1|UNIFAC: 5|Potential electrophilic agents: 2|Unbranched chai
99898842	N'-(methylaminomethyl)methanediamine	LINK	0	3	N	N	1	0.0001	0	0	0	0					acyclic N-C-N: 2|het-C-het not in ring: 2|Reactive, unstable, toxic: 3|Unbranched chain: 1|geminal_amines: 1|Aliphatic long chain: 1|Skin sensitization: 4|UNIFAC: 4|non_ring_CH2O_acetal: 2
100313349	N-(aminomethyl)hydroxylamine	LINK	0	3	N	N	1	0.0001	0	0	0	0					UNIFAC: 3|non_ring_CH2O_acetal: 1|het-C-het not in ring: 1|Genotoxic carcinogenicity, mutagenicity: 1|acyclic NO not nitro: 1|Nitrosone_not_nitro: 1|acyclic N-C-N: 1|Reactive, unstable, toxic: 4|Skin
107493031	N-(1-hydroxyethyl)formamide	LINK	0	3	N	N	1	0.0001	0	0	0	0					formate_formide: 1|Filter38_aldehyde: 1|non_ring_acetal: 1|Biodegradable compounds: 1|Idiosyncratic toxicity (RM formation): 1|UNIFAC: 2|het-C-het not in ring: 1|Reactive, unstable, toxic: 1|aldehyde:
107727876	methyl methanimidate	LINK	0	3	N	N	1	0.0001	0	0	0	0					acyclic C=N-H: 1|Nonbiodegradable compounds: 1|Reactive, unstable, toxic: 1|Imine 3: 1|Imine2: 1|imine: 2
123330952	(aminomethylamino)methanol	LINK	0	3	N	N	1	0.0001	0	0	0	0		Biodegradable compounds: 1			acyclic N-C-N: 1|Non-genotoxic carcinogenicity: 1|UNIFAC: 4|het-C-het not in ring: 2|Genotoxic carcinogenicity, mutagenicity: 1|Skin sensitization: 3|Reactive, unstable, toxic: 1|non_ring_CH2O_acetal:
123377266	N-(2-aminoethyl)formamide	LINK	0	3	N	N	1	0.0001	0	0	0	0					Skin sensitization: 1|Potential electrophilic agents: 1|Idiosyncratic toxicity (RM formation): 1|Reactive, unstable, toxic: 1|UNIFAC: 3|Unbranched chain: 1|aldehyde: 2|Aliphatic long chain: 1|formate_
123446679	2-cyanoprop-2-enamide	LINK	0	3	N	N	1	0.0001	0	0	0	0					Biodegradable compounds: 1|halo_acrylate: 1|conjugated nitrile group: 1|acrylate: 1|Michael acceptor: 1|vinyl michael acceptor2: 1|Skin sensitization: 3|Acute Aquatic Toxicity: 3|Potential electrophil
124272910	(E)-2-aminoethenol	LINK	0	3	N	N	1	0.0001	0	0	0	0					UNIFAC: 4|acyclic C=C-O: 1|Biodegradable compounds: 1
128863484	N-aminohydroxylamine	LINK	0	3	N	N	1	0.0001	0	0	0	0					Oxygen-nitrogen single bond: 2|acyclic NO not nitro: 1|Reactive, unstable, toxic: 4|Filter20_hydrazine: 1|Genotoxic carcinogenicity, mutagenicity: 2|Non-genotoxic carcinogenicity: 1|hydrazine: 2|acycl
136930325	N-(3-aminopropyl)formamide	LINK	0	3	N	N	1	0.0001	0	0	0	0					Unbranched chain: 2|Aliphatic long chain: 2|UNIFAC: 3|formate_formide: 1|Idiosyncratic toxicity (RM formation): 1|aldehyde: 2|Reactive, unstable, toxic: 1|Filter38_aldehyde: 1|Potential electrophilic
147073862	formylsulfamic acid	LINK	0	3	N	N	1	0.0001	0	0	0	0					Reactive, unstable, toxic: 3|Filter38_aldehyde: 1|S/PO3 groups: 1|Sulfonic acid: 2|UNIFAC: 1|Hetero_hetero: 1|aldehyde: 2
147614637	N'-(aminomethyl)-N'-methylmethanediamine	LINK	0	3	N	N	1	0.0001	0	0	0	0					non_ring_CH2O_acetal: 2|acyclic N-C-N: 2|Skin sensitization: 5|Nonbiodegradable compounds: 1|Reactive, unstable, toxic: 2|het-C-het not in ring: 2|UNIFAC: 6
155188511	N-(fluoromethyl)formamide	LINK	0	3	N	N	1	0.0001	0	0	0	0					UNIFAC: 1|N-C-Hal or cyano methyl: 1|Reactive, unstable, toxic: 3|Acute Aquatic Toxicity: 1|Filter26_alkyl_halide: 1|Filter52_NC_haloamine: 1|aldehyde: 2|formate_formide: 1|Idiosyncratic toxicity (RM
168539932	(E)-N1'-methylethene-1,1,2-triamine	LINK	0	3	N	N	1	0.0001	0	0	0	0					UNIFAC: 3
171796682	N'-(methoxymethyl)methanediamine	LINK	0	3	N	N	1	0.0001	0	0	0	0					Skin sensitization: 3|non_ring_CH2O_acetal: 2|Unbranched chain: 1|Aliphatic long chain: 1|Nonbiodegradable compounds: 1|Reactive, unstable, toxic: 1|acyclic N-C-N: 1|UNIFAC: 4|het-C-het not in ring: 2
171922417	N'-methyl-N'-prop-2-ynylmethanediamine	LINK	0	3	N	N	1	0.0001	0	0	0	0					UNIFAC: 6|het-C-het not in ring: 1|triple_bond: 1|Skin sensitization: 3|non_ring_CH2O_acetal: 1|triple bond: 1|Nonbiodegradable compounds: 1|Reactive, unstable, toxic: 1|acyclic N-C-N: 1
173017948	hydrazinomethanamine	LINK	0	3	N	N	1	0.0001	0	0	0	0					hydrazine: 2|non_ring_CH2O_acetal: 1|acyclic N-,=N and not N bound to carbonyl or sulfo: 1|Reactive, unstable, toxic: 5|acyclic N-C-N: 1|Non-genotoxic carcinogenicity: 1|Oxygen-nitrogen single bond: 1
176534449	methanediamine;propane	LINK	0	3	N	N	1	0.0001	0	0	0	0					het-C-het not in ring: 1|Skin sensitization: 4|non_ring_CH2O_acetal: 1|Reactive, unstable, toxic: 1|acyclic N-C-N: 1|UNIFAC: 3
179301995	formamidophosphonic acid	LINK	0	3	N	N	1	0.0001	0	0	0	0					UNIFAC: 2|Filter38_aldehyde: 1|phosphor: 1|Phosphoric acid: 1|Reactive, unstable, toxic: 4|S/PO3 groups: 1|phosphorous_nitrogen_bond: 1|aldehyde: 2
181314401	N-[(2R,3R,4S,5S,6R)-3,4,5-trihydroxy-6-(hydroxymethyl)-2-oxanyl]formamide	LINK	0	3	N	N	1	0.0001	0	0	0	0					Idiosyncratic toxicity (RM formation): 1|Reactive, unstable, toxic: 1|Nonbiodegradable compounds: 1|aldehyde: 2|UNIFAC: 5|Filter38_aldehyde: 1|Biodegradable compounds: 4|formate_formide: 1
181671582	formamide;1-propene	LINK	0	3	N	N	1	0.0001	0	0	0	0					Ethene: 1|Reactive, unstable, toxic: 1|Nonbiodegradable compounds: 1|aldehyde: 2|isolated alkene: 1|UNIFAC: 3|terminal vinyl: 1|Filter38_aldehyde: 1
183014864	(E)-4-iminobut-2-enal	LINK	0	3	N	N	1	0.0001	0	0	0	0					Biodegradable compounds: 1|Imine 3: 1|Acute Aquatic Toxicity: 1|aldehyde: 5|Imine2: 1|Genotoxic carcinogenicity, mutagenicity: 1|Reactive, unstable, toxic: 7|Filter38_aldehyde: 1|alpha beta-unsaturate
189871130	1-imidazolylmethanamine	LINK	0	3	N	N	1	0.0001	0	0	0	0					UNIFAC: 2|Skin sensitization: 1
191892764	acetonitrile;formamide	LINK	0	3	N	N	1	0.0001	0	0	0	0					Biodegradable compounds: 1|UNIFAC: 3|aldehyde: 2|Reactive, unstable, toxic: 1|Filter38_aldehyde: 1
194724056	formamide	LINK	0	3	N	N	1	0.0001	0	0	0	0					Filter38_aldehyde: 2|UNIFAC: 2|aldehyde: 4|Reactive, unstable, toxic: 2
349766685	N-(aminooxymethyl)formamide	LINK	0	3	N	N	1	0.0001	0	0	0	0					Idiosyncratic toxicity (RM formation): 1|Unbranched chain: 1|aldehyde: 2|formate_formide: 1|Filter38_aldehyde: 1|het-C-het not in ring: 1|acyclic NO not nitro: 1|UNIFAC: 1|Genotoxic carcinogenicity, m
349962833	N'-cyclobutylmethanimidamide	LINK	0	3	N	N	1	0.0001	0	0	0	0					imine: 2|Reactive, unstable, toxic: 1
350356113	N-[[(2R,3S,4R,5R)-5-(6-aminopurin-9-yl)-3,4-dihydroxy-2-oxolanyl]methyl]formamide	LINK	0	3	N	N	1	0.0001	0	0	0	0					Genotoxic carcinogenicity, mutagenicity: 3|Biodegradable compounds: 2|UNIFAC: 3|Idiosyncratic toxicity (RM formation): 1|Nonbiodegradable compounds: 1|Skin sensitization: 2|aldehyde: 2|aniline: 1|Chel
359586959	N-but-3-ynylformamide	LINK	0	3	N	N	1	0.0001	0	0	0	0					UNIFAC: 3|formate_formide: 1|Filter38_aldehyde: 1|triple bond: 1|Aliphatic long chain: 2|Unbranched chain: 2|Reactive, unstable, toxic: 1|triple_bond: 1|Idiosyncratic toxicity (RM formation): 1|aldehy
359622238	(Z)-3-amino-2-(methylamino)prop-2-enenitrile	LINK	0	3	N	N	1	0.0001	0	0	0	0					Reactive, unstable, toxic: 3|N-C-Hal or cyano methyl: 1|UNIFAC: 3|conjugated nitrile group: 1|Acute Aquatic Toxicity: 1|Biodegradable compounds: 1
386025161	(E)-1-but-1-en-3-ynamine	LINK	0	3	N	N	1	0.0001	0	0	0	0					triple_bond: 1|Enyne: 1|triple bond: 1|UNIFAC: 5
411920248	(Z)-3-aminoprop-2-enethial	LINK	0	3	N	N	1	0.0001	0	0	0	0					Michael acceptor: 1|PAINS compounds: 1|Thiocarbonyl_group: 1|Thiocarbonyl group: 1|UNIFAC: 3|Reactive, unstable, toxic: 3
532676494	N-(aminomethyl)-N-methylnitrous amide	LINK	0	3	N	N	1	0.0001	0	0	0	0					Nonbiodegradable compounds: 2|acyclic N-C-N: 1|N-nitroso: 1|non_ring_CH2O_acetal: 1|Oxygen-nitrogen single bond: 1|Genotoxic carcinogenicity, mutagenicity: 4|Skin sensitization: 5|UNIFAC: 2|Filter11_n
542241629	2-aminoethene-1,1-diol	LINK	0	3	N	N	1	0.0001	0	0	0	0					Biodegradable compounds: 2|UNIFAC: 4|acyclic C=C-O: 2
645509485	(E)-3-amino-2-propene-1-thiol	LINK	0	3	N	N	1	0.0001	0	0	0	0					thioles_(not_aromatic): 1|Filter74_thiol: 1|thiols: 1|Potential electrophilic agents: 1|Reactive, unstable, toxic: 3|UNIFAC: 5|Idiosyncratic toxicity (RM formation): 1|Skin sensitization: 1|thiol: 1
671102072	1-(aminomethylamino)ethanol	LINK	0	3	N	N	1	0.0001	0	0	0	0		Biodegradable compounds: 1			het-C-het not in ring: 2|UNIFAC: 4|Reactive, unstable, toxic: 1|acyclic N-C-N: 1|non_ring_acetal: 1|non_ring_CH2O_acetal: 1|Skin sensitization: 3
779071291	(1E)-1-hexa-1,5-dienamine	LINK	0	3	N	N	1	0.0001	0	0	0	0					terminal vinyl: 1|Nonbiodegradable compounds: 1|UNIFAC: 5|Ethene: 1|isolated alkene: 1|Aliphatic long chain: 1|Unbranched chain: 2
785450270	N-[amino(hydroxy)methyl]formamide	LINK	0	3	N	N	1	0.0001	0	0	0	0					Biodegradable compounds: 1|aldehyde: 2|formate_formide: 1|Filter38_aldehyde: 1|non_ring_acetal: 3|Reactive, unstable, toxic: 2|het-C-het not in ring: 3|Idiosyncratic toxicity (RM formation): 1|acyclic
787194864	N-formylcarbamoyl fluoride	LINK	0	3	N	N	1	0.0001	0	0	0	0					Reactive, unstable, toxic: 5|Potential electrophilic agents: 1|Idiosyncratic toxicity (RM formation): 1|carbonyl_halide: 1|acyl halide: 1|Skin sensitization: 3|Filter2_acyl_phosphyl_sulfonyl_halide: 1
794604588	(1E)-1-aminopenta-1,4-dien-3-one	LINK	0	3	N	N	1	0.0001	0	0	0	0					Filter44_michael_acceptor2: 1|Non-genotoxic carcinogenicity: 2|UNIFAC: 5|Acute Aquatic Toxicity: 2|halo_acrylate: 1|Reactive, unstable, toxic: 5|Michael acceptor: 2|Genotoxic carcinogenicity, mutageni
1163082944	N-(aminomethyl)-N'-methylmethanimidamide	LINK	0	3	N	N	1	0.0001	0	0	0	0					non_ring_CH2O_acetal: 1|UNIFAC: 3|acyclic N-C-N: 1|Reactive, unstable, toxic: 2|Unbranched chain: 1|het-C-het not in ring: 1|Skin sensitization: 3|imine: 2
1163485963	N'-[(Z)-but-2-en-2-yl]methanimidamide	LINK	0	3	N	N	1	0.0001	0	0	0	0					imine: 2|UNIFAC: 2|Reactive, unstable, toxic: 2
1163815563	(ethylhydrazo)methanamine	LINK	0	3	N	N	1	0.0001	0	0	0	0					Aliphatic long chain: 1|Oxygen-nitrogen single bond: 1|Reactive, unstable, toxic: 6|Filter20_hydrazine: 1|non_ring_CH2O_acetal: 1|Hetero_hetero: 1|hydrazine: 2|Idiosyncratic toxicity (RM formation): 1
1166128968	N-(methyliminomethyl)formamide	LINK	0	3	N	N	1	0.0001	0	0	0	0					aldehyde: 2|Unbranched chain: 1|formate_formide: 1|Reactive, unstable, toxic: 2|Idiosyncratic toxicity (RM formation): 1|Filter38_aldehyde: 1|imine: 2
1167497056	N'-ethenyl-N'-methylmethanediamine"	LINK	0	3	N	N	1	0.0001	0	0	0	0					UNIFAC: 6|terminal vinyl: 1|Skin sensitization: 3|Filter10_Terminal_vinyl: 1|het-C-het not in ring: 1|Ethene: 1|Reactive, unstable, toxic: 1|Nonbiodegradable compounds: 2|non_ring_CH2O_acetal: 1|acycl
1467881417	Ethyne	LINK	1	3	N	N	1	0.0001	0	0	0	0	1467924899		0.182		triple bond: 1
1468156145	isophthalamide	LINK	0	3	N	N	1	0.0001	0	0	0	0					UNIFAC: 2
1468156153	terephthalamide	LINK	0	3	N	N	1	0.0001	0	0	0	0					UNIFAC: 2
1468166795	oxamide	LINK	0	3	N	N	1	0.0001	0	0	0	0					Oxalyl: 1|alpha_dicarbonyl: 1|diketo group: 1|Reactive, unstable, toxic: 1|UNIFAC: 2|Filter41_12_dicarbonyl: 1|1,2-dicarbonyl not in ring: 1	1	65.78
1468174732	2-carbamoylbenzoic acid	LINK	0	3	N	N	1	0.0001	0	0	0	0		Biodegradable compounds: 1			UNIFAC: 3|Idiosyncratic toxicity (RM formation): 1	0.994	65.72
1468259079	N-desmethylenzalutamide	LINK	0	3	N	N	1	0.0001	0	0	0	0		Acute Aquatic Toxicity: 1|Nonbiodegradable compounds: 1			thiourea: 1|Nonbiodegradable compounds: 1|Idiosyncratic toxicity (RM formation): 2|UNIFAC: 3|Thiocarbonyl group: 1|Biodegradable compounds: 1|Non-genotoxic carcinogenicity: 4|26: 1|Genotoxic carcinoge	0.875	64.98
1468334142	N-butylformamide	LINK	1	3	N	N	1	0.0001	0	0	0	0					Reactive, unstable, toxic: 1|Idiosyncratic toxicity (RM formation): 1|UNIFAC: 1|Filter38_aldehyde: 1|formate_formide: 1|aldehyde: 2|Unbranched chain: 2|Aliphatic long chain: 2	0.994	64.41
1469304385	N-isopropylformamide	LINK	0	3	N	N	1	0.0001	0	0	0	0					formate_formide: 1|aldehyde: 2|UNIFAC: 1|Reactive, unstable, toxic: 1|Idiosyncratic toxicity (RM formation): 1|Filter38_aldehyde: 1	0.803	64.26
1468117320	3-(3-amino-3-carboxypropyl)uridine	LINK	0	3	N	N	1	0.0001	0	0	0	0					amino acid: 1|Biodegradable compounds: 5|Idiosyncratic toxicity (RM formation): 1|Nonbiodegradable compounds: 1|Filter82_pyridinium: 2|UNIFAC: 7	0.803	64.26
1468117891	5-methoxyuridine	LINK	0	3	N	N	1	0.0001	0	0	0	0					Nonbiodegradable compounds: 1|Filter82_pyridinium: 1|UNIFAC: 4|Biodegradable compounds: 3	0.761	63.39
1468117899	5-methyl-2-thiouridine	LINK	0	3	N	N	1	0.0001	0	0	0	0					Biodegradable compounds: 3|Nonbiodegradable compounds: 1|Filter82_pyridinium: 1|Thiocarbonyl group: 1|UNIFAC: 3	0.671	61.11
1468121286	orotidine	LINK	0	3	N	N	1	0.0001	0	0	0	0					Biodegradable compounds: 4|Nonbiodegradable compounds: 1|Idiosyncratic toxicity (RM formation): 1|UNIFAC: 5|Filter82_pyridinium: 1	0.841	60.1
1468210886	N(6)-isopentenyladenosine	LINK	0	3	N	N	1	0.0001	0	0	0	0					Skin sensitization: 2|Ethene: 1|Nonbiodegradable compounds: 2|Genotoxic carcinogenicity, mutagenicity: 1|UNIFAC: 6|Biodegradable compounds: 3|isolated alkene: 1	0.636	53.14
1468225992	2-methylthio-N(6)-(Delta(2)-isopentenyl)adenosine	LINK	0	3	N	N	1	0.0001	0	0	0	0					Genotoxic carcinogenicity, mutagenicity: 1|Skin sensitization: 2|isolated alkene: 1|Nonbiodegradable compounds: 1|UNIFAC: 7|Biodegradable compounds: 3	0.268	51.25
1468226016	2-methylthio-N(6)-(cis-4-hydroxy-Delta(2)-isopentenyl)adenosine	LINK	0	3	N	N	1	0.0001	0	0	0	0					Potential electrophilic agents: 1|Genotoxic carcinogenicity, mutagenicity: 2|Skin sensitization: 3|isolated alkene: 1|Nonbiodegradable compounds: 1|UNIFAC: 8|Biodegradable compounds: 4	0.179	50.33
1468234500	wybutoxosine	LINK	0	3	N	N	1	0.0001	0	0	0	0					Genotoxic carcinogenicity, mutagenicity: 2|Skin sensitization: 1|peroxide: 2|Nonbiodegradable compounds: 1|carbamate include di-substitued N: 1|Ester: 1|Acute Aquatic Toxicity: 1|UNIFAC: 6|Reactive, u	0.194	49.35
1468269008	succinyladenosine	LINK	0	3	N	N	1	0.0001	0	0	0	0					Idiosyncratic toxicity (RM formation): 2|Nonbiodegradable compounds: 1|Skin sensitization: 2|UNIFAC: 8|Biodegradable compounds: 6|Genotoxic carcinogenicity, mutagenicity: 1	0.25	49.27
1468695735	trans-Zeatin-O-glucoside riboside	LINK	1	3	N	N	1	0.0001	0	0	0	0					Reactive, unstable, toxic: 2|Skin sensitization: 3|Nonbiodegradable compounds: 3|Biodegradable compounds: 7|Genotoxic carcinogenicity, mutagenicity: 2|isolated alkene: 1|acetal: 1|UNIFAC: 11	0.98	40.62
1468298519	N-(deoxyguanosin-8-yl)-2-aminofluorene	LINK	0	3	N	N	1	0.0001	0	0	0	0					UNIFAC: 2|Genotoxic carcinogenicity, mutagenicity: 5|Biodegradable compounds: 2|aniline: 1|Nonbiodegradable compounds: 1|Skin sensitization: 6	0.975	40.49
4593168	2-amino-3-(2,4-dioxo-1,3-diazinan-1-yl)propanoic acid	LINK	0	3	N	N	1	0.0001	0	0	0	0					UNIFAC: 5|Idiosyncratic toxicity (RM formation): 1|amino acid: 1|Biodegradable compounds: 2|Skin sensitization: 2	0.985	39.59
41868458	2-amino-3-(5-methyl-2,4-dioxo-1-pyrimidinyl)propanoic acid	LINK	0	3	N	N	1	0.0001	0	0	0	0					amino acid: 1|Idiosyncratic toxicity (RM formation): 1|Biodegradable compounds: 2|UNIFAC: 4|Filter82_pyridinium: 1	0.707	37.34
108558074	(2S)-2-amino-3-(3-methyl-2,4-dioxo-1-pyrimidinyl)propanoic acid	LINK	0	3	N	N	1	0.0001	0	0	0	0					UNIFAC: 4|amino acid: 1|Biodegradable compounds: 2|Filter82_pyridinium: 2|Idiosyncratic toxicity (RM formation): 1	0.932	36.37
612155926	2-amino-3-(2,4-dioxo-1-pyrimidinyl)propanoic acid methyl ester	LINK	0	3	N	N	1	0.0001	0	0	0	0					Biodegradable compounds: 2|UNIFAC: 3|Filter82_pyridinium: 1|Ester: 1|amino acid: 1	1	36.28
495131359	5-fluoro-1-[(2R,4S)-4-hydroxy-5-methylene-2-oxolanyl]pyrimidine-2,4-dione	LINK	0	3	N	N	1	0.0001	0	0	0	0		Acute Aquatic Toxicity: 1|Nonbiodegradable compounds: 1			Biodegradable compounds: 1|UNIFAC: 3|Ethene: 1|Skin sensitization: 1|Filter82_pyridinium: 1|Nonbiodegradable compounds: 2	0.714	33.41
124644948	2-fluoro-3-oxopropanoic acid	LINK	0	3	N	N	1	0.0001	0	0	0	0					Idiosyncratic toxicity (RM formation): 1|UNIFAC: 3|aldehyde: 5|Biodegradable compounds: 2|beta-keto/anhydride: 1|Non-genotoxic carcinogenicity: 1|Filter38_aldehyde: 1|Potential electrophilic agents: 3	0.395	32.52
347745156	3-carbamoylimino-2-fluoropropanoic acid	LINK	0	3	N	N	1	0.0001	0	0	0	0					Biodegradable compounds: 1|imine: 1|alpha halo carbonyl: 1|Acute Aquatic Toxicity: 3|Potential electrophilic agents: 1|acyclic imines: 1|Reactive, unstable, toxic: 4|Idiosyncratic toxicity (RM formati	0.413	32.31
1468082160	alpha-D-ribose 1-diphosphate	LINK	0	3	N	N	1	0.0001	0	0	0	0					Reactive, unstable, toxic: 7|Biodegradable compounds: 3|UNIFAC: 6|S/PO3 groups: 8|alkyl esters of S or P: 1|di/triphosphate: 2|Phosphoric ester: 1|Skin sensitization: 1|Nonbiodegradable compounds: 1|P	1	32.13
15812024	5-fluoro-1-[(2R,3R,4S,5S)-3,4,5-trihydroxy-2-oxanyl]pyrimidine-2,4-dione	LINK	0	3	N	N	1	0.0001	0	0	0	0		Acute Aquatic Toxicity: 1|Nonbiodegradable compounds: 1			Biodegradable compounds: 3|Nonbiodegradable compounds: 1|UNIFAC: 4|Filter82_pyridinium: 1	0.854	31.8
183927571	3-[(2R,3R,4S,5R)-3,4-dihydroxy-5-(phosphonooxymethyl)-2-oxolanyl]-5-fluoro-2,6-dioxo-4-pyrimidinecarboxylic acid	LINK	0	3	N	N	1	0.0001	0	0	0	0		Nonbiodegradable compounds: 1|Acute Aquatic Toxicity: 1			phosphor: 1|Phosphoric acid: 1|Filter82_pyridinium: 1|S/PO3 groups: 4|Reactive, unstable, toxic: 2|Phosphoric ester: 1|Idiosyncratic toxicity (RM formation): 1|UNIFAC: 6|Biodegradable compounds: 3|Non	0.978	30.91
524055302	[(2R,3S,4R,5R)-5-(5-fluoro-6-hydroxy-2,4-dioxo-1,3-diazinan-1-yl)-3,4-dihydroxy-2-oxolanyl]methyl dihydrogen phosphate	LINK	0	3	N	N	1	0.0001	0	0	0	0					S/PO3 groups: 4|Phosphoric ester: 1|Reactive, unstable, toxic: 4|Skin sensitization: 2|Biodegradable compounds: 3|UNIFAC: 5|alkyl esters of S or P: 1|alpha halo carbonyl: 1|Potential electrophilic age	1	28
527191376	4-amino-1-(3,4-dihydroxy-2-oxolanyl)-5-fluoro-2-pyrimidinone	LINK	0	3	N	N	1	0.0001	0	0	0	0		Nonbiodegradable compounds: 1|Acute Aquatic Toxicity: 1			Filter82_pyridinium: 1|Nonbiodegradable compounds: 1|Genotoxic carcinogenicity, mutagenicity: 3|Skin sensitization: 2|Biodegradable compounds: 2|aniline: 1|UNIFAC: 3	0.693	27.76
528935691	4-amino-5-fluoro-1-[(2R,3R,4R,5R)-4-hydroxy-3-methoxy-5-methyl-2-oxolanyl]-2-pyrimidinone	LINK	0	3	N	N	1	0.0001	0	0	0	0		Nonbiodegradable compounds: 1|Acute Aquatic Toxicity: 1			Skin sensitization: 2|UNIFAC: 2|Biodegradable compounds: 1|aniline: 1|Filter82_pyridinium: 1|Nonbiodegradable compounds: 2|Genotoxic carcinogenicity, mutagenicity: 3	1	26.63
533687286	1-[(2R,3R,4S,5R)-3,4-dihydroxy-5-methyl-2-oxolanyl]-5-fluoro-4-(hydroxyamino)-2-pyrimidinone	LINK	0	3	N	N	1	0.0001	0	0	0	0		Acute Aquatic Toxicity: 1|Nonbiodegradable compounds: 1			Filter82_pyridinium: 1|Nonbiodegradable compounds: 1|Nitrosone_not_nitro: 1|Biodegradable compounds: 2|Oxygen-nitrogen single bond: 1|Genotoxic carcinogenicity, mutagenicity: 3|Skin sensitization: 2|U	0.986	24.49
533687836	4-amino-5-fluoro-1-[(2R,4S,5R)-4-hydroxy-5-methyl-2-oxolanyl]-2-pyrimidinone	LINK	0	3	N	N	1	0.0001	0	0	0	0		Nonbiodegradable compounds: 1|Acute Aquatic Toxicity: 1			Genotoxic carcinogenicity, mutagenicity: 3|Filter82_pyridinium: 1|Skin sensitization: 2|UNIFAC: 1|aniline: 1|Nonbiodegradable compounds: 1|Biodegradable compounds: 1	0.228	24.16
661544770	1-[(2R,3R,4S,5R)-3,4-dihydroxy-5-methyl-2-oxolanyl]-5-fluoro-4-(methylamino)-2-pyrimidinone	LINK	0	3	N	N	1	0.0001	0	0	0	0		Nonbiodegradable compounds: 1|Acute Aquatic Toxicity: 1			Skin sensitization: 2|Biodegradable compounds: 2|Genotoxic carcinogenicity, mutagenicity: 4|Filter82_pyridinium: 1|UNIFAC: 3|Nonbiodegradable compounds: 1	0.228	21.97
1144568968	4-amino-5-fluoro-1-[(2R,3R,4R,5R)-4-hydroxy-5-methyl-3-[[(2R)-3,4,5-trihydroxy-6-(hydroxymethyl)-2-oxanyl]oxy]-2-oxolanyl]-2-pyrimidinone	LINK	0	3	N	N	1	0.0001	0	0	0	0		Nonbiodegradable compounds: 1|Acute Aquatic Toxicity: 1			acetal: 1|Biodegradable compounds: 5|Skin sensitization: 3|aniline: 1|Filter82_pyridinium: 1|UNIFAC: 5|Genotoxic carcinogenicity, mutagenicity: 3|Nonbiodegradable compounds: 3|Reactive, unstable, toxi	0.137	21.89
1468153701	5-fluorocytidine	LINK	0	3	N	N	1	0.0001	0	0	0	0		Nonbiodegradable compounds: 1|Acute Aquatic Toxicity: 1			Genotoxic carcinogenicity, mutagenicity: 3|UNIFAC: 3|aniline: 1|Skin sensitization: 2|Filter82_pyridinium: 1|Biodegradable compounds: 3|Nonbiodegradable compounds: 1	0.27	20.7
1468012296	5flurimp	LINK	1	4	dUMP	2.1.1D1	444	1 _ around RS	1	0	6	86	1467868402	Acute Aquatic Toxicity: 1|Nonbiodegradable compounds: 1	0.778	1467866276	Biodegradable compounds: 2|peroxide: 4|Phosphoric ester: 1|43: 2|phosphor: 1|UNIFAC: 4|Reactive, unstable, toxic: 3|Filter82_pyridinium: 1|Phosphoric acid: 1|S/PO3 groups: 4|Oxygen-nitrogen single bon	0.292	51.41	Figure 3
2348347	[[(2R,3S,4R)-5-(5-fluoro-2,4-dioxo-1-pyrimidinyl)-3,4-dihydroxy-2-oxolanyl]methoxy-hydroxyphosphoryl] phosphono hydrogen phosphate	LINK	0	4	dUMP	2.1.1D1	444	1 _ around RS	1	0	4	57	1467868402	Acute Aquatic Toxicity: 1|Nonbiodegradable compounds: 1	0.778	1468012285	Reactive, unstable, toxic: 10|Phosphoric ester: 1|di/triphosphate: 3|S/PO3 groups: 12|phosphor: 3|Nonbiodegradable compounds: 1|Phosphoric acid: 3|Filter82_pyridinium: 1|alkyl esters of S or P: 1|UNIF	0.989	43.89	Figure 3
1467901632	F-dUMP	LINK	1	4	dUMP	2.1.1D1	444	1 _ around RS	1	0	3	43	1467868402	Acute Aquatic Toxicity: 1|Nonbiodegradable compounds: 1	0.823	2382083	alkyl esters of S or P: 1|LD50_mo_oral: 1|Nonbiodegradable compounds: 1|UNIFAC: 1|Filter82_pyridinium: 1|Reactive, unstable, toxic: 2|Phosphoric ester: 1|phosphor: 1|S/PO3 groups: 4|Biodegradable comp	0.935	34.41	Figure 3
5964968	[[(2R,3S,5R)-5-(5-fluoro-2,4-dioxo-1-pyrimidinyl)-3-hydroxy-2-oxolanyl]methoxy-hydroxyphosphoryl] phosphono hydrogen phosphate	LINK	0	4	dUMP	2.1.1D1	444	1 _ around RS	1	0	4	57	1467868402	Acute Aquatic Toxicity: 1|Nonbiodegradable compounds: 1	0.823	716796	Filter82_pyridinium: 1|di/triphosphate: 3|UNIFAC: 5|Phosphoric acid: 3|alkyl esters of S or P: 1|Biodegradable compounds: 1|Nonbiodegradable compounds: 1|Phosphoric ester: 1|Reactive, unstable, toxic:	0.937	28.3	Figure 3
346142803	[(2R,3S,5R)-5-(5-fluoro-2,4-dioxo-1-pyrimidinyl)-3-hydroxy-2-oxolanyl]methyl phosphono hydrogen phosphate	LINK	0	4	dUMP	2.1.1D1	444	1 _ around RS	1	0	4	57	1467868402	Nonbiodegradable compounds: 1|Acute Aquatic Toxicity: 1	0.823	716796	Filter82_pyridinium: 1|alkyl esters of S or P: 1|Reactive, unstable, toxic: 6|phosphor: 2|Nonbiodegradable compounds: 1|Phosphoric acid: 2|di/triphosphate: 2|UNIFAC: 4|S/PO3 groups: 8|Phosphoric ester	0.942	23.87	Figure 3
5196649	[5-(5-fluoro-2,4-dioxo-1-pyrimidinyl)-3,4-dihydroxy-2-oxolanyl]methyl phosphono hydrogen phosphate	LINK	0	4	dUMP	2.1.1D1	444	1 _ around RS	1	0	4	57	1467868402	Nonbiodegradable compounds: 1|Acute Aquatic Toxicity: 1	0.778	716796	Nonbiodegradable compounds: 1|Reactive, unstable, toxic: 6|alkyl esters of S or P: 1|UNIFAC: 5|Phosphoric ester: 1|Biodegradable compounds: 2|di/triphosphate: 2|S/PO3 groups: 8|phosphor: 2|Filter82_py	0.358	6.75	Figure 3
1467973290	Floxuridine	LINK	1	4	dUMP	2.1.1D1	444	1 _ around RS	1	0	2	29	1467868402	Nonbiodegradable compounds: 1|Acute Aquatic Toxicity: 1	0.828	1467973290	UNIFAC: 2|Biodegradable compounds: 2|Nonbiodegradable compounds: 1|Filter82_pyridinium: 1			Figure 3
1467981702	tega	LINK	0	4	dUMP	2.1.1D1	444	1 _ around RS	1	0	2	29	1467868402	Acute Aquatic Toxicity: 1|Nonbiodegradable compounds: 1	0.713	1467981702	Nonbiodegradable compounds: 1|Filter82_pyridinium: 1|UNIFAC: 1			Figure 3
1467898548	N6-Methyl 2’deoxy-adenosine	LINK	1	4	DA	2.7.8B1	2300	1	0	0	1	25	1468100787		0.988	5089318	Genotoxic carcinogenicity, mutagenicity: 4|Skin sensitization: 2|UNIFAC: 3|Nonbiodegradable compounds: 1|Biodegradable compounds: 2			Figure 2
1468025129	UDP-L-arabinofuranose	LINK	1	4	uri	3.5.4A1(rev)	1516	1	0	0	1	17	1467868402		0.847	1467869376	Nonbiodegradable compounds: 2|phosphor: 2|S/PO3 groups: 8|Filter82_pyridinium: 1|LD50_mo_oral: 2|UNIFAC: 5|Phosphoric ester: 2|Reactive, unstable, toxic: 7|Skin sensitization: 1|alkyl esters of S or P			Figure 2
1468045610	Purine deoxyribonucleoside	LINK	0	4	DA	3.1.3A1(rev)	2316	1	0	0	2	50	1468100787		0.975	320585	Biodegradable compounds: 2|Nonbiodegradable compounds: 1|UNIFAC: 2			Figure 2
93168	2-Chloro-adenosine	LINK	0	4	DA	3.1.3A1(rev)	108	1	0	0	2	33	1467868376	Skin sensitization: 2|Genotoxic carcinogenicity, mutagenicity: 1	0.974	1468100787	Skin sensitization: 5|UNIFAC: 3|Chelating agents: 1|Genotoxic carcinogenicity, mutagenicity: 2|Nonbiodegradable compounds: 2|2-halopyridine: 1|aniline: 1|halo-pyridine,_-diazoles_and_-triazoles: 1|Acu			FIgure 2
1467876168	2-Aminoadenosine	LINK	1	4	DA	3.1.3A1(rev)	108	1	0	0	2	33	1467868376		0.974	1467868376	Genotoxic carcinogenicity, mutagenicity: 6|Nonbiodegradable compounds: 1|Biodegradable compounds: 3|Chelating agents: 1|Skin sensitization: 4|aniline: 2|UNIFAC: 3			Figure 2
1467883069	Nebularine	LINK	1	4	DA	3.1.3A1(rev)	108	0.98	0	0	2	33	1467868376		0.963	1467883069	UNIFAC: 3|Biodegradable compounds: 3|Nonbiodegradable compounds: 1
1467894607	2-Methylaminoadenosine	LINK	1	4	DA	2.7.8B1	1541	0.964	0	0	1	17	3254574		0.982	1467868376	aniline: 1|Skin sensitization: 4|Nonbiodegradable compounds: 1|Biodegradable compounds: 3|Genotoxic carcinogenicity, mutagenicity: 7|UNIFAC: 4|Chelating agents: 1			Figure 2
1467907679	dad5	LINK	1	4	stcoa	1.5.3A1(rev)	1100	0.933	0	0	1	17	1467868376		0.913	1467868376	Chelating agents: 1|Nonbiodegradable compounds: 1|Biodegradable compounds: 2|Skin sensitization: 2|UNIFAC: 2|Genotoxic carcinogenicity, mutagenicity: 3|aniline: 1
1469374274	2'-deoxyiso-guanosine	LINK	0	4	DA	3.1.3A1(rev)	2316	0.911	0	0	2	50	1468100787		0.883	2382083	Nonbiodegradable compounds: 1|Genotoxic carcinogenicity, mutagenicity: 3|UNIFAC: 2|Biodegradable compounds: 2|Chelating agents: 1|aniline: 1|Skin sensitization: 2			Figure 2
1467889225	1-Methyladenosine	LINK	1	4	DA	2.7.8B1	1541	0.905	0	0	1	17	1467868376		0.905	1469263536	UNIFAC: 3|Filter82_pyridinium: 1|Nonbiodegradable compounds: 1|Biodegradable compounds: 3
1467867103	r5p	LINK	1	4	DR5P	2.7.1A1(rev)	554	0.903	0	0	3	100	1467871323		0.254	4680329	alkyl esters of S or P: 1|Reactive, unstable, toxic: 3|Skin sensitization: 1|phosphor: 1|Biodegradable compounds: 3|Nonbiodegradable compounds: 1|UNIFAC: 3|S/PO3 groups: 4|hemiacetal: 1|LD50_mo_oral:
1467888760	3DMET: B04851	LINK	1	4	rmn	2.7.8B1	2588	0.742	0	0	1	100	1467865936		0.769	5167500	Nonbiodegradable compounds: 1|Biodegradable compounds: 4|hemiacetal: 1|UNIFAC: 4|Skin sensitization: 1|Reactive, unstable, toxic: 1
1467871653	LXN	LINK	1	4	glcn	3.1.1A1(rev)	581	0.741	0	0	1	33				1468074245	UNIFAC: 4|Biodegradable compounds: 4|Reactive, unstable, toxic: 1
1468012274	aflbala	LINK	1	4	bALA	2.6.1A1(rev)	216	0.714	0	0	2	29	1467866836		0.455	1467926429	Acute Aquatic Toxicity: 3|UNIFAC: 4|Reactive, unstable, toxic: 1|Skin sensitization: 1|Alpha_Halo_Carbonyl: 1|Idiosyncratic toxicity (RM formation): 1|Biodegradable compounds: 1|Potential electrophili	0.935	39.66
1468159826	5-iodotubercidin	LINK	0	4	cytd	3.1.3A1(rev)	165	0.711	0	0	2	50	1467871323	Nonbiodegradable compounds: 1|Acute Aquatic Toxicity: 1	0.64	1467868376	aniline: 1|Skin sensitization: 2|Biodegradable compounds: 3|Filter9_metal: 1|Reactive, unstable, toxic: 1|UNIFAC: 4|aryl iodide: 2|Nonbiodegradable compounds: 1|unacceptable atoms: 1|iodine: 1|Genotox	1	37.83
4376074	5-(5,7-diamino-3-triazolo[4,5-d]pyrimidinyl)-2-(hydroxymethyl)-3-oxolanol	LINK	0	4	DA	3.1.3A1(rev)	2316	0.651	0	0	2	50	1468100787		0.626	1467968640	UNIFAC: 2|Skin sensitization: 4|aniline: 2|Nonbiodegradable compounds: 1|Genotoxic carcinogenicity, mutagenicity: 6|Biodegradable compounds: 2	0.646	33.08
1468046319	beta-L-Arabinofuranosyl-(1->2)-beta-L-arabinofuranose	LINK	0	4	CELB	2.4.1A1(rev)	161	0.65	0	0	2	50	1467923451		0.657	1467943074	UNIFAC: 6|acetal: 1|hemiacetal: 1|Biodegradable compounds: 6|Reactive, unstable, toxic: 3|Skin sensitization: 2|Nonbiodegradable compounds: 3	1	31.6
1468046334	alpha-1,5-L-Arabinobiose	LINK	1	4	CELB	2.4.1A1(rev)	161	0.556	0	0	2	50	1467923451		0.518	1467904218	hemiacetal: 1|Biodegradable compounds: 6|Reactive, unstable, toxic: 3|Skin sensitization: 2|Nonbiodegradable compounds: 3|UNIFAC: 7|acetal: 1	0.731	27.62
1467970739	RIB	LINK	1	4	e4p	2.2.1B1(rev)	2581	0.52	0	0	3	100	1467868938		0.257	5167500	Filter38_aldehyde: 1|aldehyde: 5|Skin sensitization: 3|Biodegradable compounds: 5|Reactive, unstable, toxic: 4|Potential electrophilic agents: 1|UNIFAC: 5|Non-genotoxic carcinogenicity: 1
1467870640	ch4s	LINK	1	4	cysam	1.13.11A5	505	0.5	0	0	1	50	1467924466		0.077	1467928748	thioles_(not_aromatic): 1|Reactive, unstable, toxic: 3|Idiosyncratic toxicity (RM formation): 1|thiol: 1|Skin sensitization: 1|thiols: 1|Potential electrophilic agents: 1|UNIFAC: 2|Filter74_thiol: 1
1467880558	oxam	LINK	1	4	oxa	1.1.1D1(rev)	2401	0.429	0	0	1	50	1467885048		0.141	30473	UNIFAC: 1|Filter41_12_dicarbonyl: 1|1,2-dicarbonyl not in ring: 1|Reactive, unstable, toxic: 1|Oxalyl: 1|alpha_dicarbonyl: 1|diketo group: 1
1467900262	AIC	LINK	1	4	xan	2.4.2B2(rev)	451	0.239	0	0	1	33				1467867515	Genotoxic carcinogenicity, mutagenicity: 3|aniline: 1|Skin sensitization: 2|UNIFAC: 1
1467970852	NMF	LINK	1	4	LACA	1.2.1D3	1982	0.231	0	0	1	17				1467970852	UNIFAC: 1|Idiosyncratic toxicity (RM formation): 1|Filter38_aldehyde: 1|formate_formide: 1|aldehyde: 2|Reactive, unstable, toxic: 1
1467912774	3DMET: B01902	LINK	1	4	3DMET: B00753	2.1.1A4(rev)	460	0.188	0	0	1	100	1467924597		0.164	1467905474	Filter82_pyridinium: 1|Potential electrophilic agents: 2|Nonbiodegradable compounds: 1|UNIFAC: 1
1468107584	5-FC	LINK	0	4	AD	2.4.2B1(rev)	112	0.15	0	0	2	50	1468107584	Acute Aquatic Toxicity: 1|Nonbiodegradable compounds: 1	1	1468107584	Genotoxic carcinogenicity, mutagenicity: 3|aniline: 1|Skin sensitization: 2
1468041889	Gloriosine	LINK	1	4	LACA	1.2.1D3	1982	0.055	0	0	1	17	1467928119		0.569	1976652	Filter38_aldehyde: 1|UNIFAC: 6|aldehyde: 2|Idiosyncratic toxicity (RM formation): 1|Reactive, unstable, toxic: 1|Skin sensitization: 2|formate_formide: 1|Potential electrophilic agents: 1
1467872492	T3	LINK	1	4	N	N	1	0.0001	0	0	0	0	1467870695		0.078	1467871372	Biodegradable compounds: 3|Non-genotoxic carcinogenicity: 1|Skin sensitization: 3|Potential electrophilic agents: 1|Filter38_aldehyde: 1|aldehyde: 5|UNIFAC: 3|Reactive, unstable, toxic: 4	0.359	20.23
1467875609	DC	LINK	1	4	N	N	1	0.0001	0	0	0	0	1467928737		0.827	33918	UNIFAC: 2|aniline: 1|Biodegradable compounds: 2|Filter82_pyridinium: 1|Skin sensitization: 2|Genotoxic carcinogenicity, mutagenicity: 3|Nonbiodegradable compounds: 1	0.354	20.09
1467866648	ald	LINK	1	4	N	N	1	0.0001	0	0	0	0	1467870695		0.027	1467871372	Skin sensitization: 3|Reactive, unstable, toxic: 3|aldehyde: 5|Non-genotoxic carcinogenicity: 1|Filter38_aldehyde: 1|Potential electrophilic agents: 1|UNIFAC: 1	0.177	16.52
1467910150	din	LINK	1	4	N	N	1	0.0001	0	0	0	0	1468100787		0.963	1467872331	UNIFAC: 2|Nonbiodegradable compounds: 1|Biodegradable compounds: 2	0.703	14.04
1467869751	DG	LINK	1	4	N	N	1	0.0001	0	0	0	0	1468100787		0.952	1467916129	Genotoxic carcinogenicity, mutagenicity: 3|Biodegradable compounds: 2|Nonbiodegradable compounds: 1|UNIFAC: 2|Skin sensitization: 2|aniline: 1	0.733	13.37
1467866677	Urea	LINK	1	4	N	N	1	0.0001	0	0	0	0	1468018124		0.5	4764391	Imine 3: 1|Biodegradable compounds: 1|Reactive, unstable, toxic: 1|UNIFAC: 3|imine: 3|acyclic C=N-H: 1	0.373	13.06
5482278	(4S)-5-fluoro-4-hydroxy-3,4-dihydro-1H-pyrimidin-2-one	LINK	0	4	N	N	1	0.0001	0	0	0	0	1467926715		0.101	1467928724	Biodegradable compounds: 1|Skin sensitization: 1|UNIFAC: 4	0.182	4.37
1467951492	Benzamide	LINK	1	4	N	N	1	0.0001	0	0	0	0	1467923441		0.504	1467867945	UNIFAC: 1	0.678
1467867087	GL	LINK	1	4	N	N	1	0.0001	0	0	0	0	1467892319		0.333	6280776	Biodegradable compounds: 3|UNIFAC: 3
1467881564	cbm	LINK	1	4	N	N	1	0.0001	0	0	0	0	1468107584		0.055	37672	UNIFAC: 1|carbamate include di-substitued N: 1
703517	N-carbamoylformamide	LINK	0	4	N	N	1	0.0001	0	0	0	0					aldehyde: 2|UNIFAC: 1|Filter38_aldehyde: 1|formate_formide: 1|Reactive, unstable, toxic: 1|Idiosyncratic toxicity (RM formation): 1|Filter93_acetyl_urea: 1|Skin sensitization: 1	0.446
178268188	(E)-aminomethyleneurea	LINK	0	4	N	N	1	0.0001	0	0	0	0					Reactive, unstable, toxic: 1|imine: 2|UNIFAC: 1	1
1468174740	3-carbamoylbenzoic acid	LINK	0	4	N	N	1	0.0001	0	0	0	0					UNIFAC: 3|Idiosyncratic toxicity (RM formation): 1|Biodegradable compounds: 1
1468178654	methacrylamide	LINK	0	4	N	N	1	0.0001	0	0	0	0					acrylate: 1|vinyl michael acceptor2: 1|Skin sensitization: 2|Potential electrophilic agents: 1|Ethene: 1|Nonbiodegradable compounds: 1|halo_acrylate: 1|UNIFAC: 3|Acute Aquatic Toxicity: 2|Michael acce
5392844	[5-(5-fluoro-2,4-dioxo-1-pyrimidinyl)-2-(phosphonooxymethyl)-3-oxolanyl] dihydrogen phosphate	LINK	0	4	N	N	1	0.0001	0	0	0	0		Acute Aquatic Toxicity: 1|Nonbiodegradable compounds: 1			S/PO3 groups: 8|phosphor: 2|Phosphoric acid: 2|Reactive, unstable, toxic: 4|alkyl esters of S or P: 2|Filter82_pyridinium: 1|Nonbiodegradable compounds: 1|UNIFAC: 4|Phosphoric ester: 2
5486031	[(2R,3S,5R)-5-[(5R)-5-fluoro-2,4-dioxo-1,3-diazinan-1-yl]-3-hydroxy-2-oxolanyl]methyl dihydrogen phosphate	LINK	0	4	N	N	1	0.0001	0	0	0	0					Idiosyncratic toxicity (RM formation): 1|alpha halo carbonyl: 1|Biodegradable compounds: 1|Nonbiodegradable compounds: 1|Reactive, unstable, toxic: 3|UNIFAC: 5|Phosphoric ester: 1|Potential electrophi
191431766	[(2S,5R)-5-(5-fluoro-2,4-dioxo-1-pyrimidinyl)-2-oxolanyl]methyl dihydrogen phosphate	LINK	0	4	N	N	1	0.0001	0	0	0	0		Nonbiodegradable compounds: 1|Acute Aquatic Toxicity: 1			Nonbiodegradable compounds: 1|Reactive, unstable, toxic: 2|alkyl esters of S or P: 1|phosphor: 1|Phosphoric acid: 1|Filter82_pyridinium: 1|S/PO3 groups: 4|Phosphoric ester: 1|UNIFAC: 2
374218394	(2R,3S,5R)-5-(5-fluoro-2,4-dioxo-1-pyrimidinyl)-3-hydroxy-2-(phosphonooxymethyl)-3-oxolanecarboxylic acid	LINK	0	4	N	N	1	0.0001	0	0	0	0		Nonbiodegradable compounds: 1|Acute Aquatic Toxicity: 1			Idiosyncratic toxicity (RM formation): 1|Nonbiodegradable compounds: 1|Biodegradable compounds: 2|Filter82_pyridinium: 1|alkyl esters of S or P: 1|Reactive, unstable, toxic: 2|phosphor: 1|Phosphoric a
380665849	[[(2R,5S)-5-(5-fluoro-2,4-dioxo-1-pyrimidinyl)-3-hydroxy-2-oxolanyl]-hydroxymethyl] dihydrogen phosphate	LINK	0	4	N	N	1	0.0001	0	0	0	0		Acute Aquatic Toxicity: 1|Nonbiodegradable compounds: 1			Phosphoric acid: 1|het-C-het not in ring: 1|S/PO3 groups: 4|Nonbiodegradable compounds: 1|Phosphoric ester: 1|UNIFAC: 4|Reactive, unstable, toxic: 2|non_ring_acetal: 1|Skin sensitization: 1|Filter82_p
2381748	1-(2,3-dihydrofuran-2-yl)-5-fluoropyrimidine-2,4-dione	LINK	0	4	N	N	1	0.0001	0	0	0	0		Acute Aquatic Toxicity: 1|Nonbiodegradable compounds: 1			UNIFAC: 3|Filter82_pyridinium: 1|Nonbiodegradable compounds: 1|Genotoxic carcinogenicity, mutagenicity: 2
2469388	5-fluoro-1-[(2S,3S)-3-hydroxy-2-oxolanyl]pyrimidine-2,4-dione	LINK	0	4	N	N	1	0.0001	0	0	0	0		Acute Aquatic Toxicity: 1|Nonbiodegradable compounds: 1			Biodegradable compounds: 1|UNIFAC: 2|Filter82_pyridinium: 1|Nonbiodegradable compounds: 1
2607993	5-fluoro-1-[(2S,4S)-4-hydroxy-2-oxolanyl]pyrimidine-2,4-dione	LINK	0	4	N	N	1	0.0001	0	0	0	0		Acute Aquatic Toxicity: 1|Nonbiodegradable compounds: 1			UNIFAC: 2|Filter82_pyridinium: 1|Nonbiodegradable compounds: 1|Biodegradable compounds: 1
3747658	1-(2-oxolanyl)pyrimidine-2,4-dione	LINK	0	4	N	N	1	0.0001	0	0	0	0					Nonbiodegradable compounds: 1|Filter82_pyridinium: 1|UNIFAC: 1
6409065	1-(2,5-dihydrofuran-2-yl)-5-fluoropyrimidine-2,4-dione	LINK	0	4	N	N	1	0.0001	0	0	0	0		Acute Aquatic Toxicity: 1|Nonbiodegradable compounds: 1			Nonbiodegradable compounds: 1|Genotoxic carcinogenicity, mutagenicity: 1|isolated alkene: 1|Filter82_pyridinium: 1|UNIFAC: 4
120660792	1-(1,4-dioxan-2-yl)-5-fluoropyrimidine-2,4-dione	LINK	0	4	N	N	1	0.0001	0	0	0	0		Acute Aquatic Toxicity: 1|Nonbiodegradable compounds: 1			UNIFAC: 2|Nonbiodegradable compounds: 2|Filter82_pyridinium: 1
121806501	5-fluoro-3-methyl-1-(2-oxolanyl)pyrimidine-2,4-dione	LINK	0	4	N	N	1	0.0001	0	0	0	0		Acute Aquatic Toxicity: 1|Nonbiodegradable compounds: 1			Filter82_pyridinium: 2|Nonbiodegradable compounds: 1|UNIFAC: 1
194507720	(2S,5S)-5-(5-fluoro-2,4-dioxo-1-pyrimidinyl)-2-oxolanecarboxylic acid	LINK	0	4	N	N	1	0.0001	0	0	0	0		Acute Aquatic Toxicity: 1|Nonbiodegradable compounds: 1			Idiosyncratic toxicity (RM formation): 1|Filter82_pyridinium: 1|UNIFAC: 2|Biodegradable compounds: 1|Nonbiodegradable compounds: 1
279854405	5-fluoro-1-[(2R)-5-methyl-2-oxolanyl]pyrimidine-2,4-dione	LINK	0	4	N	N	1	0.0001	0	0	0	0		Acute Aquatic Toxicity: 1|Nonbiodegradable compounds: 1			Filter82_pyridinium: 1|Nonbiodegradable compounds: 1
283748051	5-fluoro-1-(2-oxolanyl)-1,3-diazinane-2,4-dione	LINK	0	4	N	N	1	0.0001	0	0	0	0					Reactive, unstable, toxic: 1|alpha halo carbonyl: 1|Idiosyncratic toxicity (RM formation): 1|Nonbiodegradable compounds: 1|Acute Aquatic Toxicity: 3|Potential electrophilic agents: 1|Skin sensitizatio
377189489	5-fluoro-1-(2-methyl-2-oxolanyl)pyrimidine-2,4-dione	LINK	0	4	N	N	1	0.0001	0	0	0	0		Acute Aquatic Toxicity: 1|Nonbiodegradable compounds: 1			Nonbiodegradable compounds: 1|Filter82_pyridinium: 1|UNIFAC: 1
516845634	2-oxolanyl dihydrogen phosphate	LINK	0	4	N	N	1	0.0001	0	0	0	0					Nonbiodegradable compounds: 1|Phosphoric ester: 1|Phosphoric acid: 1|phosphor: 1|S/PO3 groups: 4|UNIFAC: 3|alkyl esters of S or P: 1|Reactive, unstable, toxic: 3|Skin sensitization: 1
7429142	(2S)-2-amino-3-(5-fluoro-2-hydroxy-6-oxo-1,2-dihydropyrimidin-3-yl)propanoic acid	LINK	0	4	N	N	1	0.0001	0	0	0	0					Idiosyncratic toxicity (RM formation): 1|amino acid: 1|Biodegradable compounds: 3|UNIFAC: 10|Reactive, unstable, toxic: 3|Skin sensitization: 1|alpha halo carbonyl: 1|Acute Aquatic Toxicity: 3
554109284	2-amino-3-(5-fluoro-2,4-dioxo-1,3-diazinan-1-yl)propanoic acid	LINK	0	4	N	N	1	0.0001	0	0	0	0					Skin sensitization: 2|Potential electrophilic agents: 1|alpha halo carbonyl: 1|Acute Aquatic Toxicity: 3|Idiosyncratic toxicity (RM formation): 2|Biodegradable compounds: 2|amino acid: 1|UNIFAC: 5|Rea
1469328236	2-fluoroacrylate	LINK	0	4	N	N	1	0.0001	0	0	0	0					Acute Aquatic Toxicity: 1|halo_acrylate: 1|Filter44_michael_acceptor2: 1|alpha halo carbonyl: 1|acrylate: 1|vinyl michael acceptor2: 1|Skin sensitization: 1|Nonbiodegradable compounds: 1|Ethene: 1|UNI
408972329	4-amino-5-fluoro-1-[(2R,5R)-5-methyl-2,5-dihydrofuran-2-yl]pyrimidin-2-one	LINK	0	4	N	N	1	0.0001	0	0	0	0		Acute Aquatic Toxicity: 1|Nonbiodegradable compounds: 1			Nonbiodegradable compounds: 1|Genotoxic carcinogenicity, mutagenicity: 3|isolated alkene: 1|aniline: 1|Skin sensitization: 2|UNIFAC: 3|Filter82_pyridinium: 1
667207641	4-amino-5-fluoro-1-[(1S,2R,4R,5S)-4-methyl-3,6-dioxabicyclo[3.1.0]hexan-2-yl]-2-pyrimidinone	LINK	0	4	N	N	1	0.0001	0	0	0	0		Acute Aquatic Toxicity: 1|Nonbiodegradable compounds: 1			Genotoxic carcinogenicity, mutagenicity: 7|Filter82_pyridinium: 1|UNIFAC: 3|Nonbiodegradable compounds: 4|Three-membered heterocycle: 1|epoxide, aziridine, thioepoxide: 1|Three_Membered_Heterocycle: 1

## Sheet: S3.2
Reaction NICEdrug ID	Link for reaction visualization in NICEdrug.ch	TRUE (or 1) if reaction is known or present in biological databases. FALSE (or 0) if reaction is generated with BNICE.ch and uniquely present in the database ATLAS of Biochemistry; these reactions have not been observed but follow known enzymatic rules (as defined in BNICE.ch) and could be experimentally validated	E.C. number of reaction	Metabolite pairs in reaction using metabolite NICEdrug ID
1556086360	LINK	0	2.1.1|1.4.3|1.5.99	1467871468 <-> 1467970852
1556086442	LINK	0	2.8.2	1467871468 <-> 147073862
1556086442	LINK	0	2.8.2	1467871468 <-> 1467866262
1556293354	LINK	0	1.4.3	1467873229 <-> 1468121286
1556307448	LINK	0	1.14.13	1467871468 <-> 1468156145
1556345369	LINK	0	1.14.13	1467871468 <-> 1467880558
1556351750	LINK	0	1.14.13	1467871468 <-> 1468166795
1556457635	LINK	0	3.2.1	1467867163 <-> 1468209045
1556460462	LINK	0	3.2.1	1467867163 <-> 1468209037
1556681403	LINK	0	1.4.3	1467873229 <-> 1468118680
1556681717	LINK	0	3.2.2	1467867163 <-> 1468118680
1556760011	LINK	0	3.2.1	1467867163 <-> 1468772956
1556767359	LINK	0	3.2.1	1467867163 <-> 1468772541
1556820223	LINK	0	1.4.3	1467871468 <-> 1468334142
1556855416	LINK	0	1.14.13	1467871468 <-> 1467885001
1556891506	LINK	0	1.14.13	1467871468 <-> 1468174732
1556901751	LINK	0	1.14.13	1467871468 <-> 1468174740
1556991761	LINK	0	1.4.3	1467873229 <-> 1468122320
1556993263	LINK	0	3.2.2	1467867163 <-> 1468122320
1557050288	LINK	0	1.3.1	1467897007 <-> 4593168
1557050515	LINK	0	2.1.1	1467897007 <-> 108558074
1557050616	LINK	0	2.1.1	1467897007 <-> 41868458
1557050732	LINK	0	2.1.1	1467897007 <-> 612155926
1557067938	LINK	0	2.1.1	1468012252 <-> 542155399
1557080909	LINK	0	1.2.1	1467928724 <-> 340651086
1557081381	LINK	0	2.1.1	1467928724 <-> 1926717
1557081484	LINK	0	2.1.1	1467928724 <-> 4371825
1557082247	LINK	0	3.5.1	1467928724 <-> 6333880
1557364885	LINK	0	3.2.1	1467867163 <-> 1468648217
1557469068	LINK	0	3.2.1	1467867163 <-> 1468218750
1557502763	LINK	0	3.2.1	1467867163 <-> 1468807457
1557678809	LINK	0	1.4.3	1467890527 <-> 1468298519
1557717449	LINK	0	1.4.3	1467873229 <-> 1468117899
1557722055	LINK	0	1.4.3	1467873229 <-> 1468117891
1557853992	LINK	0	1.4.3	1467873229 <-> 1468210886
1557872472	LINK	0	1.14.13	1467871468 <-> 1467951492
1557952901	LINK	0	1.4.3	1467871468 <-> 1468032507
1557984944	LINK	0	3.2.1	1467867163 <-> 1468631685
1558021913	LINK	0	1.14.13	1467871468 <-> 1468259079
1558023575	LINK	0	1.14.13|3.2.1	1467867163 <-> 1468263054
1558110746	LINK	0	1.4.3	1467873229 <-> 1468695735
1558402130	LINK	0	1.4.3	1467873229 <-> 1468073776
1558409739	LINK	0	1.4.3	1467873229 <-> 1468117168
1558537268	LINK	0	3.2.1	1467867163 <-> 1468823472
1558550251	LINK	0	1.4.3	1467873229 <-> 1468267574
1558551304	LINK	0	3.2.2	1467867163 <-> 1468267574
1558571203	LINK	0	2.4.10|2.5.1|3.2.1	1467867163 <-> 1468046319
1558571434	LINK	0	2.4.1|2.4.10|3.2.1	1467867163 <-> 1468793081
1558572216	LINK	0	2.4.10|3.2.1	1467867163 <-> 1468046334
1558575654	LINK	0	2.4.10|2.5.1|3.2.1	1467867163 <-> 1468642232
1558581505	LINK	0	2.7.1	1467867163 <-> 1468025129
1558686833	LINK	0	1.14.13	1467871468 <-> 3729468
1558687107	LINK	0	2.4.1	1467871468 <-> 181314401
1558765496	LINK	0	3.2.1	1467867163 <-> 1468694622
1558773356	LINK	0	1.4.3	1467873229 <-> 1468234500
1558915577	LINK	0	2.1.1	1467871468 <-> 107727876
1558923426	LINK	0	1.4.3	1467871468 <-> 1467887918
1558945574	LINK	0	2.5.1	1467871468 <-> 350356113
1558945574	LINK	0	2.5.1	1467871468 <-> 1467895544
1558945734	LINK	0	2.5.1	1467871468 <-> 136930325
1558945734	LINK	0	2.5.1	1467871468 <-> 1467867842
1558945853	LINK	0	2.7.3	1467871468 <-> 179301995
1559031574	LINK	0	1.14.13	1467871468 <-> 1468178654
1559059555	LINK	1	4.2.1	1467871468 <-> 1467867901
1559087888	LINK	0	1.13.11	1467871468 <-> 124272910
1559090028	LINK	0	1.13.11	1467871468 <-> 5313821
1559093872	LINK	0	1.13.11	1467871468 <-> 63166894
1559099903	LINK	0	1.4.3|1.5.99	1467871468 <-> 100313349
1559101158	LINK	0	1.4.3	1467871468 <-> 173017948
1559124592	LINK	0	1.13.11	1467871468 <-> 386025161
1559127250	LINK	0	1.2.1	1467871468 <-> 60533728
1559200608	LINK	0	3.2.1	1467867163 <-> 1468209029
1559278867	LINK	0	1.3.1	1468012263 <-> 348450276
1559278964	LINK	0	1.5.3|1.5.1	1468012263 <-> 347745156
1559279064	LINK	0	1.4.1|1.4.3|1.5.99	1468012263 <-> 124644948
1559279064	LINK	0	1.4.1|1.4.3|1.5.99	1468012263 <-> 1467866677
1559279189	LINK	0	2.1.3|3.5.1	1468012263 <-> 1468012274
1559279335	LINK	0	4.3.1	1468012263 <-> 1469328236
1559280962	LINK	0	1.11.1	1467867163 <-> 152904345
1559281014	LINK	0	1.14.13	1467867163 <-> 667855462
1559281072	LINK	0	1.14.13	1467867163 <-> 499359386
1559281113	LINK	0	1.14.13	1467867163 <-> 380543341
1559281162	LINK	0	1.14.13	1467867163 <-> 1116609308
1559281807	LINK	0	1.17.99	1467867163 <-> 7426425
1559281827	LINK	0	2.1.1	1467867163 <-> 124122395
1559281865	LINK	0	2.1.1	1467867163 <-> 1467888760
1559281899	LINK	0	2.1.1	1467867163 <-> 349810317
1559281935	LINK	0	2.1.1	1467867163 <-> 152709200
1559281971	LINK	0	2.1.1	1467867163 <-> 182949084
1559281997	LINK	0	2.1.1	1467867163 <-> 483351349
1559282059	LINK	0	2.1.1	1467867163 <-> 350488338
1559282111	LINK	0	2.1.1	1467867163 <-> 1468711492
1559282143	LINK	0	2.1.1	1467867163 <-> 1956106
1559282790	LINK	0	2.4.10	1467867163 <-> 495136774
1559282825	LINK	0	2.7.1|3.1.3	1467867163 <-> 183078432
1559282847	LINK	0	2.7.1|3.1.3	1467867163 <-> 508944978
1559282905	LINK	0	2.7.1	1467867163 <-> 279033288
1559282935	LINK	0	2.8.2	1467867163 <-> 553720244
1559282935	LINK	0	2.8.2	1467867163 <-> 1467866262
1559282969	LINK	0	2.8.2	1467867163 <-> 1166055059
1559282991	LINK	1	3.1.3	1467867163 <-> 1467867103
1559283039	LINK	0	3.1.3	1467867163 <-> 1467872897
1559283055	LINK	0	3.3.2	1467867163 <-> 378570209
1559283069	LINK	0	3.3.2	1467867163 <-> 634008912
1559283083	LINK	0	3.5.1	1467867163 <-> 670247892
1559283101	LINK	0	3.5.1	1467867163 <-> 349332437
1559283135	LINK	0	4.1.1	1467867163 <-> 7707
1559283150	LINK	0	4.1.2	1467867163 <-> 1467872492
1559283164	LINK	0	4.2.1	1467867163 <-> 305749629
1559283179	LINK	0	4.2.1	1467867163 <-> 800518149
1559456700	LINK	0	1.14.13	1467871468 <-> 1467912774
1559552067	LINK	0	1.13.11	1467871468 <-> 542241629
1559625101	LINK	0	3.5.1	1467871468 <-> 292802
1559748492	LINK	0	1.14.13	1467871468 <-> 1468156153
1559899903	LINK	0	1.4.3|1.5.99	1467871468 <-> 1966680
1559954781	LINK	0	1.4.3	1467871468 <-> 123330952
1559983043	LINK	0	1.3.1	1467984309 <-> 554109284
1559992229	LINK	0	1.14.13	1467871468 <-> 1467900262
1560036507	LINK	0	1.4.3	1467871468 <-> 155188511
1560052552	LINK	0	1.14.13|2.1.1|3.5.1	1467871468 <-> 1467867313
1560052898	LINK	0	3.5.1	1467871468 <-> 703517
1560067115	LINK	0	1.4.3	1467871468 <-> 128863484
1560437851	LINK	0	1.14.13|1.14.18|1.17.99|3.1.3|3.5.1	1467871468 <-> 191892764
1560439919	LINK	0	1.14.13|2.3.1	1467867163 <-> 1468222014
1560448229	LINK	0	1.3.1	1467901632 <-> 5486031
1560448333	LINK	0	1.14.13	1467901632 <-> 380665849
1560448367	LINK	0	1.14.13|1.14.15	1467901632 <-> 191431766
1560448580	LINK	0	2.7.1|3.1.3	1467901632 <-> 5392844
1560448618	LINK	0	2.7.4|3.6.1	1467901632 <-> 5964968
1560448659	LINK	0	2.7.4|3.6.1	1467901632 <-> 346142803
1560448905	LINK	0	4.1.1	1467901632 <-> 374218394
1560452636	LINK	0	2.4.1|2.5.1|3.2.1	1467867163 <-> 1468806002
1560455404	LINK	0	3.5.4	1467871468 <-> 1166128968
1560523065	LINK	0	1.4.3	1467871468 <-> 231034
1560531759	LINK	0	1.4.3	1467871468 <-> 1469304385
1560644158	LINK	0	1.4.3|1.5.99	1467871468 <-> 1167497056
1560716704	LINK	0	1.14.13	1467871468 <-> 1928145
1560733051	LINK	0	1.14.13	1468012296 <-> 1467901632
1560733051	LINK	0	1.14.13	1467901632 <-> 1468012296
1560733330	LINK	0	4.1.1	1468012296 <-> 183927571
1560733445	LINK	0	4.2.1	1468012296 <-> 524055302
1560733698	LINK	0	2.7.1	1468012296 <-> 15812024
1560733843	LINK	0	2.7.4	1468012296 <-> 2348347
1560733959	LINK	0	2.7.4|3.6.1	1468012296 <-> 5196649
1560735487	LINK	0	1.13.11	1467871468 <-> 178268188
1560810971	LINK	0	1.4.3	1467871468 <-> 1468041889
1560981110	LINK	0	1.4.3|1.5.99	1467871468 <-> 671102072
1560997859	LINK	0	1.14.13|2.1.1|2.4.10|3.1.3|3.5.1	1467871468 <-> 181671582
1561010011	LINK	0	1.4.3	1467871468 <-> 171796682
1561164403	LINK	0	1.2.1|1.2.3|1.14.13|2.1.1|2.4.1|2.5.1|2.7.3|2.8.2|3.5.1|4.2.1	1467871468 <-> 1467881417
1561164754	LINK	0	1.2.3	1467871468 <-> 1467881564
1561167075	LINK	0	4.2.1	1467871468 <-> 5479281
1561210978	LINK	0	1.4.3	1467871468 <-> 176534449
1561216428	LINK	0	1.13.11	1467871468 <-> 168539932
1561223221	LINK	0	1.4.3	1467873229 <-> 1468117320
1561231810	LINK	0	1.4.3|1.5.99	1467871468 <-> 1163082944
1561259673	LINK	0	1.13.11	1467871468 <-> 411920248
1561279364	LINK	0	3.2.1	1467867163 <-> 1468642219
1561279780	LINK	0	3.2.1	1467867163 <-> 1468808553
1561305042	LINK	0	1.4.3	1467873229 <-> 1468159826
1561307106	LINK	0	3.2.2	1467867163 <-> 1468159826
1561312912	LINK	0	3.5.1	1467871468 <-> 787194864
1561342281	LINK	0	1.4.3	1467873229 <-> 1468225992
1561411019	LINK	0	1.4.3	1467873229 <-> 1468234524
1561411309	LINK	0	3.2.2	1467867163 <-> 1468234524
1561452607	LINK	0	1.4.3	1467873229 <-> 1468269008
1561479184	LINK	0	1.4.3	1467873229 <-> 1468234468
1561479582	LINK	0	3.2.2	1467867163 <-> 1468234468
1561572871	LINK	0	1.4.3	1467871468 <-> 690128
1561580103	LINK	0	1.4.3	1467871468 <-> 107493031
1561599840	LINK	0	1.4.3|1.5.99	1467871468 <-> 532676494
1561653505	LINK	0	1.14.13	1467871468 <-> 123446679
1561676941	LINK	0	1.4.3	1467871468 <-> 123377266
1561758356	LINK	0	1.4.3	1467873229 <-> 1468226016
1561803514	LINK	0	1.4.3|1.5.99	1467871468 <-> 147614637
1561809945	LINK	0	1.4.3|1.5.99	1467871468 <-> 1163815563
1561811696	LINK	0	1.4.3	1467871468 <-> 96726194
1561813644	LINK	0	1.4.3|1.5.99	1467871468 <-> 99898842
1561826546	LINK	0	1.13.11	1467871468 <-> 645509485
1561895596	LINK	0	1.14.13|2.1.1|3.5.1	1467871468 <-> 194724056
1561904547	LINK	0	1.4.3	1467871468 <-> 785450270
1561906249	LINK	0	1.4.3	1467871468 <-> 349766685
1562034132	LINK	0	1.13.11	1467871468 <-> 794604588
1562057434	LINK	0	1.4.3	1467871468 <-> 359586959
1562077379	LINK	0	1.4.3	1467871468 <-> 189871130
1562092038	LINK	0	1.13.11	1467871468 <-> 359622238
1562115028	LINK	0	1.13.11	1467871468 <-> 183014864
1562150203	LINK	0	1.13.11	1467871468 <-> 779071291
1562318447	LINK	0	1.4.3	1467871468 <-> 687648
1562468502	LINK	0	1.13.11	1467871468 <-> 1163485963
1562472663	LINK	0	1.13.11	1467871468 <-> 349962833
1562485890	LINK	0	1.4.3	1467871468 <-> 171922417
1569666972	LINK	1	3.2.2	1467867163 <-> 1467869376
1569668780	LINK	1	3.2.2	1467867163 <-> 1467868376
1569670601	LINK	1	4.2.1	1467871468 <-> 1467879774
1569673328	LINK	1	3.2.2	1467867163 <-> 1467870385
1569674251	LINK	1	3.2.2	1467867163 <-> 1467869312
1569677662	LINK	1	3.2.2	1467867163 <-> 1467871323
1569680522	LINK	1	3.1.1	1467873229 <-> 1467871653
1569694439	LINK	1	3.2.2	1467867163 <-> 1467889225
1569731702	LINK	1	3.5.4	1468012307 <-> 1467981815
1569731715	LINK	1	2.4.2|1.4.3|3.2.2	1467928724 <-> 1467981815
1569731715	LINK	1	2.4.2	1468012320 <-> 1467981815
1569731769	LINK	1	2.4.2|1.4.3|2.4.10|3.2.2	1467928724 <-> 1468012285
1569731769	LINK	1	2.4.2	1468012285 <-> 1467872897
1569731782	LINK	1	2.4.2|1.4.3|3.2.2	1467928724 <-> 1467973290
1569731782	LINK	1	2.4.2	1467973290 <-> 1467873411
1569819879	LINK	1	1.1.1	1467873229 <-> 1467970739
1569839311	LINK	1	2.4.2	1468012320 <-> 1467907679
1569883779	LINK	1	2.2.1	1467867163 <-> 1467970739
1654744268	LINK	0	1.4.3	1467873229 <-> 1467869312
1654753736	LINK	0	1.4.3	1467873229 <-> 1467871323
1654839235	LINK	0	1.14.13	1467928724 <-> 2152589
1654840076	LINK	0	1.14.13	1467871468 <-> 3376785
1654842454	LINK	0	1.4.3	1467873229 <-> 1467968602
1654844363	LINK	0	3.2.2	1467867163 <-> 1467968602
1654904958	LINK	0	1.14.13	1467871468 <-> 6331565
1654914884	LINK	0	1.14.13	1467871468 <-> 6332959
1654957952	LINK	0	1.14.13	6333880 <-> 169270182
1654957952	LINK	0	1.14.13	6333880 <-> 1467871468
1654958054	LINK	0	1.14.13	6333880 <-> 690722
1654958140	LINK	0	1.97.1	6333880 <-> 3561969
1655086990	LINK	0	1.4.3	1467873229 <-> 1467894607
1655088569	LINK	0	3.2.2	1467867163 <-> 1467894607
1655115160	LINK	0	1.1.1	1467973290 <-> 3737249
1655115237	LINK	0	1.3.1	1467973290 <-> 280067964
1655115390	LINK	0	1.4.3	1467890527 <-> 1467973290
1655115472	LINK	0	1.4.3	1467973290 <-> 657200208
1655115540	LINK	0	1.14.13	1467973290 <-> 344680969
1655115723	LINK	0	1.14.13|1.17.99	1467973290 <-> 4306684
1655115793	LINK	0	1.14.13|1.14.15	1467973290 <-> 4617684
1655116502	LINK	0	2.1.1	1467973290 <-> 129023520
1655116582	LINK	0	2.1.1	1467973290 <-> 104623372
1655116656	LINK	0	2.1.1	1467973290 <-> 52546585
1655116737	LINK	0	2.1.1	1467973290 <-> 103859651
1655117155	LINK	0	2.4.1	1467973290 <-> 790642950
1655117352	LINK	0	2.4.2	1467916210 <-> 1467973290
1655117429	LINK	0	2.7.1|3.1.3	1467973290 <-> 786599249
1655117487	LINK	0	3.1.3	1467973290 <-> 1467901632
1655117887	LINK	0	4.2.1	1467973290 <-> 495131359
1655117933	LINK	0	4.2.1	1467973290 <-> 3843725
1655117986	LINK	0	4.2.1	1467973290 <-> 124936840
1655130075	LINK	0	1.14.13	1467871468 <-> 6334486
1655167622	LINK	0	1.4.3	1467873229 <-> 93168
1655169766	LINK	0	3.2.2	1467867163 <-> 93168
1655194408	LINK	0	1.4.3	1467873229 <-> 1467868376
1655220337	LINK	0	1.14.13	1467871468 <-> 6333451
1655400336	LINK	0	1.14.13	1467871468 <-> 1467885048
1655407141	LINK	0	1.4.3	1467890527 <-> 1467868402
1655408577	LINK	0	2.4.2	1467916210 <-> 1467868402
1655436597	LINK	0	1.4.3	1467871468 <-> 6257087
1655450869	LINK	0	1.4.3	1467890527 <-> 1468045610
1655454367	LINK	0	2.4.2	1467916210 <-> 1468045610
1655568987	LINK	0	5.3.1	1467867163 <-> 1467906853
1655592116	LINK	0	1.14.13	1467871468 <-> 235057
1655622063	LINK	0	1.17.99	1468012320 <-> 1467872897
1655660348	LINK	0	1.4.3	1467890527 <-> 1467872331
1655664027	LINK	0	2.4.2	1467916210 <-> 1467872331
1655690160	LINK	0	1.4.3	1467890527 <-> 1467871955
1655693451	LINK	0	2.4.2	1467916210 <-> 1467871955
1655738734	LINK	0	1.1.1|1.17.3	1467928724 <-> 2152578
1655738944	LINK	0	1.2.1	1467928724 <-> 5482278
1655739113	LINK	0	1.4.3	1467928724 <-> 31820103
1655739218	LINK	0	1.97.1	1467928724 <-> 1467866960
1655739327	LINK	0	2.4.1	1467928724 <-> 4316900
1655739363	LINK	0	2.4.1	1467928724 <-> 493432759
1655739412	LINK	0	2.4.1	1467928724 <-> 2377683
1655739483	LINK	0	2.4.1	1467928724 <-> 347048629
1655739626	LINK	0	3.5.1	1467928724 <-> 348450276
1655739678	LINK	0	3.5.4	1467928724 <-> 734874
1655739856	LINK	0	4.1.1	1467928724 <-> 690722
1655739892	LINK	0	4.2.1	1467928724 <-> 38310
1655739930	LINK	0	4.3.1	1467928724 <-> 544682925
1655739973	LINK	0	6.3.4	1467928724 <-> 660072650
1655750860	LINK	0	1.2.1	1467981815 <-> 394764570
1655750904	LINK	0	1.2.1	1467981815 <-> 527336856
1655751074	LINK	0	1.3.1	1467981815 <-> 283828022
1655751244	LINK	0	1.4.3	1467981815 <-> 6392571
1655751356	LINK	0	1.14.13|1.17.99	1468012285 <-> 1467981815
1655751451	LINK	0	1.14.13|1.14.15|1.17.4	1467981815 <-> 4306684
1655751958	LINK	0	1.97.1	1467981815 <-> 1469356561
1655752054	LINK	0	2.1.1	1467981815 <-> 97425361
1655752132	LINK	0	2.1.1	1467981815 <-> 125778372
1655752246	LINK	0	2.1.1	1467981815 <-> 171793629
1655752595	LINK	0	2.1.1	1467981815 <-> 98672959
1655752696	LINK	0	2.7.1|3.1.3	1467981815 <-> 376217713
1655752759	LINK	0	2.7.1|3.1.3	1467981815 <-> 376217724
1655752978	LINK	0	3.2.2	1467981815 <-> 7426425
1655753813	LINK	0	1.4.3	1467873229 <-> 1467883069
1733926117	LINK	0	1.4.3	1467871468 <-> 1937394
1733966748	LINK	0	3.3.1	1467867163 <-> 6270242
1733970742	LINK	0	1.14.13	1467871468 <-> 1956480
1733977010	LINK	0	1.4.3	1467890527 <-> 6329858
1733997018	LINK	0	1.3.1	1467981702 <-> 283748051
1733997153	LINK	0	1.4.3|2.4.2|3.2.2	1467928724 <-> 1467981702
1733997252	LINK	0	1.5.3	1467981702 <-> 6409065
1733997281	LINK	0	1.5.3	1467981702 <-> 2381748
1733997363	LINK	0	1.14.13|1.14.15	1467981702 <-> 2469388
1733997398	LINK	0	1.14.13|1.14.15	1467981702 <-> 2607993
1733997707	LINK	0	1.14.13	1467981702 <-> 120660792
1733997968	LINK	0	1.97.1	1467981702 <-> 3747658
1733998078	LINK	0	2.1.1	1467981702 <-> 121806501
1733998142	LINK	0	2.1.1	1467981702 <-> 377189489
1733998197	LINK	0	2.1.1	1467981702 <-> 279854405
1733998562	LINK	0	2.4.2	1467981702 <-> 516845634
1733998769	LINK	0	4.1.1	1467981702 <-> 194507720
1734125887	LINK	0	1.14.13	1467871468 <-> 6333072
1734174525	LINK	0	3.2.1	1467867163 <-> 6302909
1734209975	LINK	0	1.2.1	1467871468 <-> 3424418
1734286064	LINK	0	1.4.3	1467871468 <-> 6272791
1734328813	LINK	0	6.3.2	1467871468 <-> 6294283
1734423989	LINK	0	3.3.1	1467928724 <-> 3739482
1734495969	LINK	0	1.2.1	1467871468 <-> 4133903
1734572257	LINK	0	1.4.3	1467890527 <-> 1467910150
1734572817	LINK	0	2.4.2	1467916210 <-> 1467910150
1734584689	LINK	0	1.1.1	1468012285 <-> 278849152
1734584747	LINK	0	1.2.1	1468012285 <-> 783362511
1734584878	LINK	0	1.3.1	1468012285 <-> 283827562
1734585075	LINK	0	1.4.3	1468012285 <-> 1467873229
1734585127	LINK	0	1.4.3	1468012285 <-> 94771894
1734585267	LINK	0	1.14.13|1.14.15|1.17.4	1468012285 <-> 52548895
1734585746	LINK	0	1.97.1	1468012285 <-> 1467869376
1734585805	LINK	0	2.1.1	1468012285 <-> 501887784
1734585849	LINK	0	2.1.1	1468012285 <-> 350062558
1734585917	LINK	0	2.1.1	1468012285 <-> 6039643
1734585983	LINK	0	2.1.1	1468012285 <-> 516336039
1734586032	LINK	0	2.1.1	1468012285 <-> 488793670
1734586095	LINK	0	2.1.1	1468012285 <-> 131206792
1734586161	LINK	0	2.1.1	1468012285 <-> 181972258
1734586248	LINK	0	2.1.1	1468012285 <-> 4261002
1734586885	LINK	0	2.4.1	1468012285 <-> 95341727
1734586933	LINK	0	2.4.1	1468012285 <-> 299258385
1734587127	LINK	0	2.4.2	1468012285 <-> 1468082160
1734587206	LINK	0	2.7.1|3.1.3	1468012285 <-> 681503799
1734587292	LINK	0	2.7.1|3.1.3	1468012285 <-> 681605675
1734587349	LINK	0	3.1.3	1468012296 <-> 1468012285
1734587557	LINK	0	3.2.2	1467867163 <-> 1468012285
1734587607	LINK	0	3.3.2	1468012285 <-> 4592093
1734587672	LINK	0	3.5.1	1468012285 <-> 18068406
1734587776	LINK	0	3.5.4	1468012285 <-> 4598695
1734587922	LINK	0	4.1.1	1468012285 <-> 667891820
1734587967	LINK	0	4.2.1	1468012285 <-> 667207608
1734588027	LINK	0	4.2.1	1468012285 <-> 121740632
1734588082	LINK	0	4.2.1	1468012285 <-> 3843725
1734588288	LINK	0	1.4.3	1468012307 <-> 6392571
1734588288	LINK	0	1.4.3|2.4.2|3.2.2	1468012307 <-> 1468107584
1734588356	LINK	0	1.7.1|1.14.13	1468012307 <-> 533687286
1734588481	LINK	0	1.14.13|1.17.99	1468012307 <-> 1468153701
1734588595	LINK	0	1.14.13|1.14.15|1.17.4	1468012307 <-> 533687836
1734588975	LINK	0	1.97.1	1468012307 <-> 5268291
1734589044	LINK	0	2.1.1	1468012307 <-> 528935691
1734589107	LINK	0	2.1.1	1468012307 <-> 661544770
1734589274	LINK	0	2.1.1	1468012307 <-> 527191376
1734589318	LINK	0	2.4.1	1468012307 <-> 1144568968
1734589407	LINK	0	2.4.2	1468012307 <-> 1468012320
1734589407	LINK	0	2.4.2	1468012320 <-> 1468012307
1734589445	LINK	0	3.2.2	1468012307 <-> 7426425
1734589489	LINK	0	3.3.2	1468012307 <-> 667207641
1734589520	LINK	0	4.2.1	1468012307 <-> 408972329
1734647095	LINK	0	1.4.3	1467890527 <-> 4376074
1734685359	LINK	0	1.14.13	1467871468 <-> 126820997
1734737490	LINK	0	1.14.13	1467871468 <-> 6310950
1734743097	LINK	0	1.14.13	1467871468 <-> 6282511
1734755048	LINK	0	1.4.3	1467873229 <-> 2134518
1734755354	LINK	0	3.2.2	1467867163 <-> 2134518
1734759582	LINK	0	1.4.1|1.4.3	1467928724 <-> 4558098
1734759582	LINK	0	1.4.1|1.4.3	4558098 <-> 1467866648
1734759712	LINK	0	1.14.13|1.14.18|1.17.99	4558098 <-> 52266770
1734759864	LINK	0	1.97.1	4558098 <-> 41222699
1734759921	LINK	0	2.1.1	4558098 <-> 124787841
1734759981	LINK	0	2.1.1	4558098 <-> 171635765
1734760090	LINK	0	2.1.1	4558098 <-> 1926717
1734760121	LINK	0	3.5.1	4558098 <-> 449391202
1735031755	LINK	0	1.4.3	1467873229 <-> 6330955
1735032073	LINK	0	3.2.2	1467867163 <-> 6330955
1735095776	LINK	0	1.14.13	1467871468 <-> 4602707
1735162416	LINK	0	1.14.13	1467871468 <-> 8476734
1735275783	LINK	0	1.4.3	1467873229 <-> 5163703
1735275903	LINK	0	3.2.2	1467867163 <-> 5163703
1735289498	LINK	0	1.14.13|1.14.15	4359371 <-> 4359360
1735289541	LINK	0	1.14.13|1.14.15	4359360 <-> 97162890
1735289750	LINK	0	1.97.1	4359360 <-> 4275950
1735348777	LINK	0	2.4.2	1467916210 <-> 1469374274
1735410803	LINK	0	1.4.3	1467873229 <-> 6331076
1735411467	LINK	0	3.2.2	1467867163 <-> 6331076
1735498194	LINK	0	1.4.3	1467873229 <-> 44980643
1735498262	LINK	0	3.2.2	1467867163 <-> 44980643
1735608832	LINK	0	1.14.13	1467871468 <-> 110694
1735717296	LINK	0	1.2.1	1467871468 <-> 6284190
1735728010	LINK	0	1.14.13	1467871468 <-> 6334762
1735892039	LINK	0	1.4.3|2.4.2|3.2.2	6339880 <-> 4595675
1735892039	LINK	0	1.4.3	6339880 <-> 1467890527
1735892039	LINK	0	1.4.3	1467890527 <-> 6339880
1735892059	LINK	0	1.14.13|1.14.15|1.17.4	6339880 <-> 400046896
1735892139	LINK	0	2.1.1|3.3.1	6339880 <-> 51969235
1735892171	LINK	0	2.4.2	6339880 <-> 1467873411
1735892187	LINK	0	2.4.2	6339880 <-> 1467916210
1735892203	LINK	0	3.2.2	6339880 <-> 1467883705
1735892219	LINK	0	3.3.1	6339880 <-> 1467870640
1735892219	LINK	0	3.3.1	6339880 <-> 1467973290
1735892236	LINK	0	3.3.1	6339880 <-> 1467867313
1735897549	LINK	0	3.2.1	1467867163 <-> 6290751
1735931548	LINK	0	1.4.3	1467890527 <-> 2988944
1735960050	LINK	0	1.14.13	1467871468 <-> 1468689788
1736130758	LINK	0	1.14.13	1467871468 <-> 4110314
1736136295	LINK	0	1.4.3	1467873229 <-> 6313340
1736136394	LINK	0	3.2.2	1467867163 <-> 6313340
1736334077	LINK	0	1.14.13	1467871468 <-> 3630714
1736403068	LINK	0	2.4.2	1467916210 <-> 1467898548
1736419751	LINK	0	1.2.1	1467871468 <-> 3424451
1736596251	LINK	0	1.2.1	6299287 <-> 2579598
1736596251	LINK	0	1.2.1|1.14.13|3.1.1	6299287 <-> 1467867087
1736596291	LINK	0	1.14.13|3.1.1	6299287 <-> 690722
1736596315	LINK	0	1.14.13	6299287 <-> 122608888
1736596315	LINK	0	1.14.13	6299287 <-> 169270182
1736596339	LINK	0	1.97.1	6299287 <-> 6403364
1736620441	LINK	0	1.4.3	1467873229 <-> 19290
1736621148	LINK	0	3.2.2	1467867163 <-> 19290
1736727742	LINK	0	1.14.13	1467871468 <-> 6308058
1736870432	LINK	0	1.4.3	1467873229 <-> 1467869376
1736875982	LINK	0	2.4.2	1467916210 <-> 1467869751
1736879696	LINK	0	1.4.3	1467873229 <-> 1467870385
1736894811	LINK	0	2.7.4	1467916210 <-> 1467873411
1736897521	LINK	0	1.4.3	1467890527 <-> 1467875609
1736899431	LINK	0	2.4.2	1467916210 <-> 1467875609
1736911350	LINK	0	1.4.3	1467873229 <-> 1467883352
1736924098	LINK	0	1.4.3	1467873229 <-> 6291088
1736924249	LINK	0	3.2.2	1467867163 <-> 6291088
1736925642	LINK	0	1.4.3	1467871468 <-> 6257054
1736988922	LINK	0	1.14.13	1467871468 <-> 3263975
1737201554	LINK	0	1.4.3	1467873229 <-> 4276630
1737202091	LINK	0	3.2.2	1467867163 <-> 4276630
1737272148	LINK	0	1.4.3	1467873229 <-> 6289850
1737272217	LINK	0	3.2.2	1467867163 <-> 6289850
1737296479	LINK	0	1.14.13	1467871468 <-> 93339106
1737392854	LINK	0	1.14.13	1467871468 <-> 3011108
1737407133	LINK	0	1.4.3	1467890527 <-> 4376063
1737407599	LINK	0	2.4.2	1467916210 <-> 4376063
1737634238	LINK	0	1.4.1|1.4.3	1467928724 <-> 4359371
1737634238	LINK	0	1.4.1|1.4.3	4359371 <-> 401269895
1737634302	LINK	0	1.5.3	4359371 <-> 5850519
1737634343	LINK	0	1.14.13|1.14.15	4359371 <-> 168182581
1737634368	LINK	0	1.14.13|1.14.15	4359371 <-> 2137884
1737634475	LINK	0	1.97.1	4359371 <-> 4247199
1737874747	LINK	0	1.14.13	1467871468 <-> 6333127
1737939247	LINK	0	1.4.3	1467873229 <-> 1467876168
1737939582	LINK	0	3.2.2	1467867163 <-> 1467876168
1737961409	LINK	0	1.2.1	1467984309 <-> 7429142
1737961543	LINK	0	1.4.1|1.4.3|4.3.1	1467928724 <-> 1467984309
1737961648	LINK	0	1.97.1	1467984309 <-> 1467897007
1737989416	LINK	0	1.14.13	1467871468 <-> 1467867595
1738020626	LINK	0	1.3.1	3626787 <-> 191245016
1738020685	LINK	0	1.4.3	3626787 <-> 1467866414
1738020685	LINK	0	1.4.3|2.1.1	3626787 <-> 1468107584
1738020708	LINK	0	1.5.1|1.5.3	3626787 <-> 1109236999
1738020795	LINK	0	1.14.13	3626787 <-> 1926717
1738020821	LINK	0	1.97.1	3626787 <-> 1468159487
1738020840	LINK	0	2.1.1	3626787 <-> 390661636
1738021033	LINK	0	4.2.1	3626787 <-> 284046642
1738415031	LINK	0	1.4.3	1467873229 <-> 6288923
1738415156	LINK	0	1.14.13	1467871468 <-> 6288923
1738415356	LINK	0	3.2.2	1467867163 <-> 6288923
2070043163	LINK	1	1.3.1	1467928724 <-> 1468012252
2592815586	LINK	1	1.1.1	1467867163 <-> 1467873229
2592815586	LINK	1	1.1.1	1467873229 <-> 1467867163
2592849230	LINK	1	3.5.1	1468012252 <-> 1468012263
2592849264	LINK	1	2.4.2	1468012296 <-> 1467867132
