# Supplementary material for: NICEdrug.ch, a workflow for rational drug design and systems-level analysis of drug metabolism
Source: eLife. 2021 Aug 3;10:e65543. doi: 10.7554/eLife.65543 (PMC8331181; doi:10.7554/eLife.65543)
Supplement: Supplementary file 4. — (A) Matrix of NICEdrug score between each pair of the whole set of 254 molecules in NICEdrug.ch with reactive site of statins. (B) Description of nine drugs candidates for repurposing to replace statins based on NICEdrug.ch. These drugs can act as competitive inhibitors of HMG-CoA reductase like statins. [file elife-65543-supp4.xlsx]

## Sheet: summary
Tab in Supplementary_File_4	Description of each tab/section in Supplementary_File_4, related to Figure 5
S4.1	Matrix of NICEdrug score between each pair of the whole set of 254 molecules in the NICEdrug.ch with reactive site of statins
S4.2	Description of nine drugs candidates for repurposing to replace statins based on NICEdrug.ch. These drugs can act as competitive inhibitors of HMG-CoA reductase, like statins.

## Sheet: S4.1
Molecule NICEdrug ID	33476	39916	53241	376396	417244	420338	434396	513586	599701	622462	639541	1980486	2207136	2207812	2661679	3626930	3904013	3978648	4214918	4397514	4535185	4611597	4829773	4832610	5068891	5075531	5350718	5459982	6157431	6157541	6181710	6181732	6188704	6188726	6188792	6188814	6188836	6193453	6206299	6206937	6206992	6207014	6207025	6207036	6207047	6207157	6207289	6210553	6210564
33476	1	0.1	0.13	0.14	0.1	0.12	0.18	0.17	0.12	0.23	0.15	0.17	0.19	0.28	0.15	0.14	0.07	0.12	0.27	0.09	0.17	0.11	0.39	0.08	0.13	0.12	0.13	0.17	0.15	0.11	0.17	0.16	0.15	0.15	0.15	0.15	0.15	0.16	0.12	0.14	0.11	0.15	0.14	0.14	0.15	0.16	0.1	0.25	0.27
39916	0.1	1	0.75	0.17	0.95	0.63	0.16	0.23	0.15	0.28	0.23	0.22	0.21	0.2	0.12	0.18	0.29	0.11	0.22	0.13	0.26	0.35	0.28	0.18	0.07	0.19	0.34	0.43	0.1	0.12	0.26	0.13	0.21	0.21	0.21	0.21	0.21	0.17	0.08	0.1	0.09	0.18	0.18	0.13	0.18	0.2	0.09	0.23	0.22
53241	0.13	0.75	1	0.18	0.71	0.77	0.2	0.2	0.15	0.38	0.28	0.28	0.25	0.22	0.14	0.18	0.24	0.13	0.27	0.11	0.26	0.3	0.33	0.17	0.08	0.23	0.37	0.44	0.12	0.14	0.27	0.16	0.26	0.26	0.26	0.26	0.26	0.17	0.09	0.12	0.11	0.22	0.21	0.16	0.22	0.24	0.1	0.3	0.29
376396	0.14	0.17	0.18	1	0.18	0.18	0.18	0.12	0.78	0.13	0.19	0.14	0.16	0.12	0.11	0.12	0.22	0.09	0.16	0.12	0.14	0.19	0.21	0.21	0.05	0.1	0.2	0.23	0.08	0.08	0.17	0.1	0.12	0.12	0.12	0.12	0.12	0.84	0.06	0.07	0.15	0.1	0.1	0.1	0.1	0.15	0.15	0.15	0.14
417244	0.1	0.95	0.71	0.18	1	0.64	0.16	0.22	0.17	0.27	0.22	0.21	0.21	0.19	0.12	0.18	0.31	0.1	0.21	0.13	0.26	0.36	0.27	0.18	0.07	0.19	0.34	0.42	0.09	0.12	0.26	0.13	0.21	0.21	0.21	0.21	0.21	0.18	0.08	0.1	0.09	0.17	0.17	0.13	0.17	0.19	0.08	0.23	0.21
420338	0.12	0.63	0.77	0.18	0.64	1	0.14	0.19	0.16	0.35	0.27	0.26	0.26	0.2	0.14	0.17	0.25	0.12	0.26	0.09	0.23	0.29	0.31	0.16	0.08	0.24	0.34	0.42	0.1	0.12	0.26	0.16	0.25	0.25	0.25	0.25	0.25	0.16	0.08	0.1	0.1	0.21	0.2	0.15	0.21	0.23	0.1	0.31	0.27
434396	0.18	0.16	0.2	0.18	0.16	0.14	1	0.16	0.16	0.2	0.22	0.22	0.2	0.26	0.19	0.19	0.11	0.15	0.24	0.1	0.19	0.13	0.14	0.23	0.11	0.12	0.18	0.19	0.13	0.12	0.17	0.15	0.14	0.14	0.14	0.14	0.14	0.18	0.11	0.15	0.21	0.13	0.13	0.13	0.13	0.16	0.22	0.25	0.27
513586	0.17	0.23	0.2	0.12	0.22	0.19	0.16	1	0.11	0.18	0.25	0.31	0.34	0.4	0.26	0.4	0.13	0.19	0.3	0.1	0.46	0.24	0.21	0.16	0.13	0.1	0.2	0.3	0.09	0.09	0.28	0.13	0.15	0.15	0.15	0.15	0.15	0.14	0.08	0.11	0.08	0.11	0.11	0.11	0.11	0.22	0.08	0.36	0.39
599701	0.12	0.15	0.15	0.78	0.17	0.16	0.16	0.11	1	0.1	0.17	0.13	0.16	0.1	0.1	0.11	0.24	0.09	0.12	0.11	0.12	0.19	0.17	0.19	0.05	0.08	0.18	0.19	0.07	0.07	0.14	0.08	0.09	0.09	0.09	0.09	0.09	0.75	0.05	0.06	0.13	0.08	0.08	0.08	0.08	0.14	0.13	0.14	0.12
622462	0.23	0.28	0.38	0.13	0.27	0.35	0.2	0.18	0.1	1	0.28	0.2	0.25	0.33	0.17	0.16	0.15	0.12	0.53	0.06	0.19	0.13	0.29	0.11	0.14	0.29	0.33	0.47	0.14	0.18	0.29	0.28	0.36	0.36	0.36	0.36	0.36	0.1	0.11	0.15	0.14	0.36	0.32	0.23	0.36	0.24	0.13	0.3	0.32
639541	0.15	0.23	0.28	0.19	0.22	0.27	0.22	0.25	0.17	0.28	1	0.37	0.25	0.27	0.27	0.32	0.23	0.24	0.35	0.12	0.26	0.2	0.28	0.26	0.1	0.17	0.4	0.33	0.11	0.13	0.29	0.19	0.22	0.22	0.22	0.22	0.22	0.17	0.09	0.12	0.15	0.18	0.18	0.17	0.18	0.32	0.15	0.32	0.33
1980486	0.17	0.22	0.28	0.14	0.21	0.26	0.22	0.31	0.13	0.2	0.37	1	0.4	0.33	0.41	0.43	0.14	0.34	0.31	0.11	0.36	0.21	0.17	0.2	0.14	0.1	0.25	0.27	0.1	0.09	0.25	0.14	0.16	0.16	0.16	0.16	0.16	0.14	0.08	0.11	0.11	0.12	0.12	0.11	0.12	0.22	0.1	0.46	0.5
2207136	0.19	0.21	0.25	0.16	0.21	0.26	0.2	0.34	0.16	0.25	0.25	0.4	1	0.41	0.3	0.3	0.16	0.2	0.42	0.1	0.49	0.26	0.21	0.13	0.15	0.12	0.28	0.46	0.11	0.1	0.31	0.16	0.19	0.19	0.19	0.19	0.19	0.16	0.09	0.13	0.1	0.14	0.14	0.13	0.14	0.25	0.09	0.63	0.56
2207812	0.28	0.2	0.22	0.12	0.19	0.2	0.26	0.4	0.1	0.33	0.27	0.33	0.41	1	0.27	0.34	0.12	0.19	0.6	0.1	0.42	0.21	0.21	0.15	0.16	0.15	0.22	0.31	0.15	0.14	0.28	0.21	0.24	0.24	0.24	0.24	0.24	0.13	0.12	0.18	0.12	0.18	0.18	0.17	0.18	0.28	0.12	0.55	0.61
2661679	0.15	0.12	0.14	0.11	0.12	0.14	0.19	0.26	0.1	0.17	0.27	0.41	0.3	0.27	1	0.69	0.12	0.43	0.27	0.15	0.26	0.13	0.14	0.26	0.12	0.09	0.22	0.21	0.09	0.08	0.19	0.12	0.14	0.14	0.14	0.14	0.14	0.11	0.07	0.1	0.09	0.11	0.11	0.1	0.11	0.17	0.09	0.28	0.3
3626930	0.14	0.18	0.18	0.12	0.18	0.17	0.19	0.4	0.11	0.16	0.32	0.43	0.3	0.34	0.69	1	0.15	0.43	0.26	0.18	0.4	0.19	0.18	0.3	0.12	0.09	0.25	0.23	0.09	0.08	0.21	0.12	0.14	0.14	0.14	0.14	0.14	0.14	0.07	0.1	0.09	0.11	0.1	0.1	0.11	0.2	0.09	0.31	0.33
3904013	0.07	0.29	0.24	0.22	0.31	0.25	0.11	0.13	0.24	0.15	0.23	0.14	0.16	0.12	0.12	0.15	1	0.1	0.14	0.12	0.18	0.23	0.17	0.24	0.05	0.13	0.33	0.28	0.07	0.07	0.18	0.09	0.14	0.14	0.14	0.14	0.14	0.21	0.06	0.06	0.1	0.12	0.12	0.1	0.12	0.13	0.1	0.15	0.13
3978648	0.12	0.11	0.13	0.09	0.1	0.12	0.15	0.19	0.09	0.12	0.24	0.34	0.2	0.19	0.43	0.43	0.1	1	0.18	0.13	0.19	0.11	0.13	0.22	0.1	0.08	0.16	0.16	0.07	0.07	0.15	0.1	0.12	0.12	0.12	0.12	0.12	0.09	0.06	0.09	0.08	0.09	0.09	0.08	0.09	0.15	0.08	0.22	0.23
4214918	0.27	0.22	0.27	0.16	0.21	0.26	0.24	0.3	0.12	0.53	0.35	0.31	0.42	0.6	0.27	0.26	0.14	0.18	1	0.08	0.32	0.17	0.27	0.15	0.16	0.22	0.3	0.45	0.15	0.16	0.39	0.31	0.32	0.32	0.32	0.32	0.32	0.13	0.11	0.17	0.15	0.27	0.27	0.25	0.27	0.31	0.14	0.49	0.55
4397514	0.09	0.13	0.11	0.12	0.13	0.09	0.1	0.1	0.11	0.06	0.12	0.11	0.1	0.1	0.15	0.18	0.12	0.13	0.08	1	0.12	0.11	0.1	0.17	0.04	0.05	0.13	0.1	0.07	0.06	0.1	0.05	0.07	0.07	0.07	0.07	0.07	0.13	0.06	0.06	0.05	0.05	0.05	0.05	0.05	0.08	0.05	0.1	0.1
4535185	0.17	0.26	0.26	0.14	0.26	0.23	0.19	0.46	0.12	0.19	0.26	0.36	0.49	0.42	0.26	0.4	0.18	0.19	0.32	0.12	1	0.25	0.21	0.19	0.13	0.1	0.31	0.34	0.1	0.09	0.28	0.13	0.16	0.16	0.16	0.16	0.16	0.16	0.08	0.12	0.09	0.12	0.12	0.11	0.12	0.23	0.08	0.46	0.49
4611597	0.11	0.35	0.3	0.19	0.36	0.29	0.13	0.24	0.19	0.13	0.2	0.21	0.26	0.21	0.13	0.19	0.23	0.11	0.17	0.11	0.25	1	0.19	0.17	0.07	0.1	0.23	0.29	0.1	0.09	0.22	0.1	0.12	0.12	0.12	0.12	0.12	0.21	0.07	0.09	0.08	0.1	0.1	0.1	0.1	0.21	0.08	0.27	0.23
4829773	0.39	0.28	0.33	0.21	0.27	0.31	0.14	0.21	0.17	0.29	0.28	0.17	0.21	0.21	0.14	0.18	0.17	0.13	0.27	0.1	0.21	0.19	1	0.15	0.09	0.16	0.28	0.32	0.1	0.13	0.24	0.16	0.22	0.22	0.22	0.22	0.22	0.22	0.08	0.1	0.1	0.18	0.18	0.15	0.18	0.22	0.1	0.25	0.25
4832610	0.08	0.18	0.17	0.21	0.18	0.16	0.23	0.16	0.19	0.11	0.26	0.2	0.13	0.15	0.26	0.3	0.24	0.22	0.15	0.17	0.19	0.17	0.15	1	0.06	0.08	0.22	0.16	0.07	0.08	0.15	0.09	0.11	0.11	0.11	0.11	0.11	0.22	0.06	0.07	0.19	0.09	0.09	0.08	0.09	0.14	0.21	0.15	0.15
5068891	0.13	0.07	0.08	0.05	0.07	0.08	0.11	0.13	0.05	0.14	0.1	0.14	0.15	0.16	0.12	0.12	0.05	0.1	0.16	0.04	0.13	0.07	0.09	0.06	1	0.08	0.09	0.11	0.08	0.08	0.1	0.1	0.1	0.1	0.1	0.1	0.1	0.05	0.07	0.09	0.07	0.1	0.09	0.09	0.1	0.1	0.07	0.15	0.16
5075531	0.12	0.19	0.23	0.1	0.19	0.24	0.12	0.1	0.08	0.29	0.17	0.1	0.12	0.15	0.09	0.09	0.13	0.08	0.22	0.05	0.1	0.1	0.16	0.08	0.08	1	0.23	0.24	0.1	0.11	0.18	0.16	0.2	0.2	0.2	0.2	0.2	0.08	0.08	0.1	0.1	0.2	0.2	0.17	0.2	0.14	0.09	0.14	0.15
5350718	0.13	0.34	0.37	0.2	0.34	0.34	0.18	0.2	0.18	0.33	0.4	0.25	0.28	0.22	0.22	0.25	0.33	0.16	0.3	0.13	0.31	0.23	0.28	0.22	0.09	0.23	1	0.43	0.1	0.13	0.29	0.17	0.23	0.23	0.23	0.23	0.23	0.18	0.08	0.11	0.1	0.2	0.21	0.17	0.2	0.22	0.1	0.27	0.27
5459982	0.17	0.43	0.44	0.23	0.42	0.42	0.19	0.3	0.19	0.47	0.33	0.27	0.46	0.31	0.21	0.23	0.28	0.16	0.45	0.1	0.34	0.29	0.32	0.16	0.11	0.24	0.43	1	0.12	0.13	0.45	0.21	0.33	0.33	0.33	0.33	0.33	0.2	0.09	0.13	0.12	0.28	0.26	0.19	0.28	0.28	0.11	0.42	0.41
6157431	0.15	0.1	0.12	0.08	0.09	0.1	0.13	0.09	0.07	0.14	0.11	0.1	0.11	0.15	0.09	0.09	0.07	0.07	0.15	0.07	0.1	0.1	0.1	0.07	0.08	0.1	0.1	0.12	1	0.67	0.25	0.48	0.24	0.24	0.24	0.24	0.24	0.08	0.65	0.81	0.32	0.44	0.43	0.48	0.44	0.31	0.31	0.14	0.14
6157541	0.11	0.12	0.14	0.08	0.12	0.12	0.12	0.09	0.07	0.18	0.13	0.09	0.1	0.14	0.08	0.08	0.07	0.07	0.16	0.06	0.09	0.09	0.13	0.08	0.08	0.11	0.13	0.13	0.67	1	0.28	0.52	0.27	0.27	0.27	0.27	0.27	0.08	0.53	0.74	0.35	0.5	0.49	0.53	0.5	0.29	0.34	0.13	0.13
6181710	0.17	0.26	0.27	0.17	0.26	0.26	0.17	0.28	0.14	0.29	0.29	0.25	0.31	0.28	0.19	0.21	0.18	0.15	0.39	0.1	0.28	0.22	0.24	0.15	0.1	0.18	0.29	0.45	0.25	0.28	1	0.45	0.42	0.42	0.42	0.42	0.42	0.15	0.2	0.28	0.25	0.41	0.41	0.43	0.41	0.44	0.24	0.35	0.36
6181732	0.16	0.13	0.16	0.1	0.13	0.16	0.15	0.13	0.08	0.28	0.19	0.14	0.16	0.21	0.12	0.12	0.09	0.1	0.31	0.05	0.13	0.1	0.16	0.09	0.1	0.16	0.17	0.21	0.48	0.52	0.45	1	0.45	0.45	0.45	0.45	0.45	0.09	0.39	0.58	0.48	0.86	0.84	0.77	0.86	0.41	0.46	0.19	0.2
6188704	0.15	0.21	0.26	0.12	0.21	0.25	0.14	0.15	0.09	0.36	0.22	0.16	0.19	0.24	0.14	0.14	0.14	0.12	0.32	0.07	0.16	0.12	0.22	0.11	0.1	0.2	0.23	0.33	0.24	0.27	0.42	0.45	1	1	1	1	1	0.11	0.31	0.27	0.26	0.54	0.5	0.38	0.54	0.43	0.24	0.22	0.23
6188726	0.15	0.21	0.26	0.12	0.21	0.25	0.14	0.15	0.09	0.36	0.22	0.16	0.19	0.24	0.14	0.14	0.14	0.12	0.32	0.07	0.16	0.12	0.22	0.11	0.1	0.2	0.23	0.33	0.24	0.27	0.42	0.45	1	1	1	1	1	0.11	0.31	0.27	0.26	0.54	0.5	0.38	0.54	0.43	0.24	0.22	0.23
6188792	0.15	0.21	0.26	0.12	0.21	0.25	0.14	0.15	0.09	0.36	0.22	0.16	0.19	0.24	0.14	0.14	0.14	0.12	0.32	0.07	0.16	0.12	0.22	0.11	0.1	0.2	0.23	0.33	0.24	0.27	0.42	0.45	1	1	1	1	1	0.11	0.31	0.27	0.26	0.54	0.5	0.38	0.54	0.43	0.24	0.22	0.23
6188814	0.15	0.21	0.26	0.12	0.21	0.25	0.14	0.15	0.09	0.36	0.22	0.16	0.19	0.24	0.14	0.14	0.14	0.12	0.32	0.07	0.16	0.12	0.22	0.11	0.1	0.2	0.23	0.33	0.24	0.27	0.42	0.45	1	1	1	1	1	0.11	0.31	0.27	0.26	0.54	0.5	0.38	0.54	0.43	0.24	0.22	0.23
6188836	0.15	0.21	0.26	0.12	0.21	0.25	0.14	0.15	0.09	0.36	0.22	0.16	0.19	0.24	0.14	0.14	0.14	0.12	0.32	0.07	0.16	0.12	0.22	0.11	0.1	0.2	0.23	0.33	0.24	0.27	0.42	0.45	1	1	1	1	1	0.11	0.31	0.27	0.26	0.54	0.5	0.38	0.54	0.43	0.24	0.22	0.23
6193453	0.16	0.17	0.17	0.84	0.18	0.16	0.18	0.14	0.75	0.1	0.17	0.14	0.16	0.13	0.11	0.14	0.21	0.09	0.13	0.13	0.16	0.21	0.22	0.22	0.05	0.08	0.18	0.2	0.08	0.08	0.15	0.09	0.11	0.11	0.11	0.11	0.11	1	0.06	0.07	0.14	0.08	0.08	0.08	0.08	0.15	0.14	0.15	0.14
6206299	0.12	0.08	0.09	0.06	0.08	0.08	0.11	0.08	0.05	0.11	0.09	0.08	0.09	0.12	0.07	0.07	0.06	0.06	0.11	0.06	0.08	0.07	0.08	0.06	0.07	0.08	0.08	0.09	0.65	0.53	0.2	0.39	0.31	0.31	0.31	0.31	0.31	0.06	1	0.64	0.27	0.36	0.36	0.38	0.36	0.22	0.26	0.11	0.11
6206937	0.14	0.1	0.12	0.07	0.1	0.1	0.15	0.11	0.06	0.15	0.12	0.11	0.13	0.18	0.1	0.1	0.06	0.09	0.17	0.06	0.12	0.09	0.1	0.07	0.09	0.1	0.11	0.13	0.81	0.74	0.28	0.58	0.27	0.27	0.27	0.27	0.27	0.07	0.64	1	0.36	0.52	0.51	0.54	0.52	0.3	0.34	0.16	0.17
6206992	0.11	0.09	0.11	0.15	0.09	0.1	0.21	0.08	0.13	0.14	0.15	0.11	0.1	0.12	0.09	0.09	0.1	0.08	0.15	0.05	0.09	0.08	0.1	0.19	0.07	0.1	0.1	0.12	0.32	0.35	0.25	0.48	0.26	0.26	0.26	0.26	0.26	0.14	0.27	0.36	1	0.44	0.44	0.42	0.44	0.27	0.81	0.12	0.12
6207014	0.15	0.18	0.22	0.1	0.17	0.21	0.13	0.11	0.08	0.36	0.18	0.12	0.14	0.18	0.11	0.11	0.12	0.09	0.27	0.05	0.12	0.1	0.18	0.09	0.1	0.2	0.2	0.28	0.44	0.5	0.41	0.86	0.54	0.54	0.54	0.54	0.54	0.08	0.36	0.52	0.44	1	0.93	0.72	1	0.38	0.42	0.17	0.18
6207025	0.14	0.18	0.21	0.1	0.17	0.2	0.13	0.11	0.08	0.32	0.18	0.12	0.14	0.18	0.11	0.1	0.12	0.09	0.27	0.05	0.12	0.1	0.18	0.09	0.09	0.2	0.21	0.26	0.43	0.49	0.41	0.84	0.5	0.5	0.5	0.5	0.5	0.08	0.36	0.51	0.44	0.93	1	0.72	0.93	0.37	0.42	0.17	0.17
6207036	0.14	0.13	0.16	0.1	0.13	0.15	0.13	0.11	0.08	0.23	0.17	0.11	0.13	0.17	0.1	0.1	0.1	0.08	0.25	0.05	0.11	0.1	0.15	0.08	0.09	0.17	0.17	0.19	0.48	0.53	0.43	0.77	0.38	0.38	0.38	0.38	0.38	0.08	0.38	0.54	0.42	0.72	0.72	1	0.72	0.35	0.4	0.16	0.16
6207047	0.15	0.18	0.22	0.1	0.17	0.21	0.13	0.11	0.08	0.36	0.18	0.12	0.14	0.18	0.11	0.11	0.12	0.09	0.27	0.05	0.12	0.1	0.18	0.09	0.1	0.2	0.2	0.28	0.44	0.5	0.41	0.86	0.54	0.54	0.54	0.54	0.54	0.08	0.36	0.52	0.44	1	0.93	0.72	1	0.38	0.42	0.17	0.18
6207157	0.16	0.2	0.24	0.15	0.19	0.23	0.16	0.22	0.14	0.24	0.32	0.22	0.25	0.28	0.17	0.2	0.13	0.15	0.31	0.08	0.23	0.21	0.22	0.14	0.1	0.14	0.22	0.28	0.31	0.29	0.44	0.41	0.43	0.43	0.43	0.43	0.43	0.15	0.22	0.3	0.27	0.38	0.37	0.35	0.38	1	0.25	0.32	0.33
6207289	0.1	0.09	0.1	0.15	0.08	0.1	0.22	0.08	0.13	0.13	0.15	0.1	0.09	0.12	0.09	0.09	0.1	0.08	0.14	0.05	0.08	0.08	0.1	0.21	0.07	0.09	0.1	0.11	0.31	0.34	0.24	0.46	0.24	0.24	0.24	0.24	0.24	0.14	0.26	0.34	0.81	0.42	0.42	0.4	0.42	0.25	1	0.11	0.12
6210553	0.25	0.23	0.3	0.15	0.23	0.31	0.25	0.36	0.14	0.3	0.32	0.46	0.63	0.55	0.28	0.31	0.15	0.22	0.49	0.1	0.46	0.27	0.25	0.15	0.15	0.14	0.27	0.42	0.14	0.13	0.35	0.19	0.22	0.22	0.22	0.22	0.22	0.15	0.11	0.16	0.12	0.17	0.17	0.16	0.17	0.32	0.11	1	0.87
6210564	0.27	0.22	0.29	0.14	0.21	0.27	0.27	0.39	0.12	0.32	0.33	0.5	0.56	0.61	0.3	0.33	0.13	0.23	0.55	0.1	0.49	0.23	0.25	0.15	0.16	0.15	0.27	0.41	0.14	0.13	0.36	0.2	0.23	0.23	0.23	0.23	0.23	0.14	0.11	0.17	0.12	0.18	0.17	0.16	0.18	0.33	0.12	0.87	1
6213625	0.18	0.46	0.41	0.19	0.44	0.38	0.18	0.45	0.15	0.42	0.38	0.26	0.35	0.4	0.22	0.33	0.25	0.17	0.48	0.11	0.4	0.32	0.37	0.22	0.11	0.22	0.4	0.68	0.12	0.13	0.41	0.22	0.33	0.33	0.33	0.33	0.33	0.19	0.1	0.13	0.12	0.26	0.26	0.19	0.26	0.31	0.12	0.4	0.41
6213669	0.19	0.42	0.38	0.18	0.4	0.36	0.19	0.43	0.14	0.45	0.36	0.27	0.36	0.44	0.23	0.31	0.23	0.17	0.52	0.11	0.38	0.29	0.33	0.2	0.12	0.23	0.38	0.71	0.12	0.14	0.44	0.23	0.35	0.35	0.35	0.35	0.35	0.18	0.1	0.14	0.13	0.28	0.27	0.2	0.28	0.31	0.12	0.41	0.43
6213691	0.25	0.27	0.24	0.13	0.25	0.22	0.23	0.6	0.12	0.28	0.3	0.36	0.42	0.65	0.3	0.41	0.14	0.21	0.49	0.11	0.49	0.28	0.23	0.18	0.15	0.14	0.25	0.43	0.13	0.12	0.38	0.18	0.22	0.22	0.22	0.22	0.22	0.16	0.11	0.16	0.11	0.16	0.16	0.15	0.16	0.3	0.11	0.56	0.62
6255620	0.2	0.36	0.4	0.19	0.34	0.36	0.22	0.43	0.16	0.37	0.4	0.33	0.46	0.56	0.24	0.38	0.22	0.18	0.54	0.13	0.53	0.3	0.35	0.22	0.12	0.19	0.38	0.5	0.14	0.15	0.43	0.24	0.28	0.28	0.28	0.28	0.28	0.2	0.11	0.15	0.13	0.22	0.21	0.21	0.22	0.33	0.12	0.52	0.53
6255730	0.24	0.17	0.23	0.12	0.17	0.21	0.23	0.33	0.1	0.28	0.28	0.35	0.38	0.49	0.27	0.29	0.11	0.21	0.45	0.09	0.35	0.18	0.23	0.14	0.2	0.13	0.21	0.31	0.13	0.12	0.27	0.18	0.21	0.21	0.21	0.21	0.21	0.12	0.11	0.16	0.11	0.16	0.16	0.15	0.16	0.29	0.11	0.56	0.62
6258406	0.19	0.21	0.22	0.11	0.2	0.21	0.18	0.59	0.1	0.22	0.27	0.38	0.44	0.53	0.31	0.49	0.13	0.22	0.39	0.1	0.59	0.23	0.22	0.17	0.15	0.11	0.23	0.3	0.1	0.1	0.27	0.15	0.17	0.17	0.17	0.17	0.17	0.13	0.09	0.12	0.09	0.13	0.13	0.12	0.13	0.25	0.09	0.46	0.51
6260665	0.26	0.21	0.23	0.14	0.2	0.21	0.24	0.36	0.13	0.33	0.28	0.3	0.38	0.82	0.25	0.32	0.13	0.18	0.54	0.11	0.39	0.25	0.22	0.15	0.15	0.16	0.24	0.33	0.19	0.14	0.3	0.2	0.23	0.23	0.23	0.23	0.23	0.16	0.12	0.17	0.12	0.18	0.18	0.18	0.18	0.34	0.12	0.48	0.52
6270944	0.16	0.14	0.16	0.14	0.13	0.15	0.2	0.26	0.12	0.17	0.29	0.32	0.24	0.26	0.52	0.51	0.14	0.35	0.26	0.18	0.22	0.15	0.16	0.3	0.1	0.1	0.26	0.22	0.1	0.1	0.21	0.13	0.15	0.15	0.15	0.15	0.15	0.13	0.09	0.12	0.1	0.12	0.12	0.11	0.12	0.18	0.1	0.27	0.29
6272584	0.18	0.41	0.39	0.21	0.4	0.37	0.19	0.4	0.17	0.41	0.35	0.29	0.43	0.4	0.22	0.29	0.24	0.16	0.48	0.12	0.43	0.32	0.33	0.19	0.11	0.22	0.42	0.69	0.12	0.14	0.47	0.22	0.31	0.31	0.31	0.31	0.31	0.21	0.1	0.13	0.12	0.24	0.25	0.2	0.24	0.31	0.12	0.44	0.45
6275347	0.19	0.36	0.42	0.23	0.35	0.4	0.2	0.31	0.18	0.5	0.37	0.3	0.47	0.36	0.23	0.28	0.25	0.17	0.54	0.11	0.42	0.26	0.35	0.18	0.12	0.25	0.56	0.69	0.13	0.14	0.42	0.24	0.33	0.33	0.33	0.33	0.33	0.19	0.1	0.14	0.13	0.29	0.28	0.21	0.29	0.3	0.12	0.45	0.47
6282068	0.25	0.23	0.3	0.15	0.22	0.28	0.23	0.27	0.11	0.52	0.34	0.29	0.37	0.52	0.23	0.23	0.14	0.18	0.76	0.08	0.28	0.17	0.3	0.14	0.15	0.25	0.28	0.43	0.14	0.16	0.36	0.3	0.35	0.35	0.35	0.35	0.35	0.13	0.11	0.16	0.15	0.27	0.27	0.25	0.27	0.31	0.14	0.46	0.5
6291862	0.23	0.3	0.27	0.14	0.29	0.25	0.22	0.63	0.12	0.26	0.34	0.34	0.4	0.58	0.28	0.44	0.16	0.2	0.44	0.11	0.54	0.32	0.27	0.2	0.14	0.13	0.27	0.41	0.13	0.12	0.36	0.18	0.2	0.2	0.2	0.2	0.2	0.16	0.1	0.15	0.11	0.16	0.15	0.14	0.16	0.31	0.11	0.54	0.59
6292367	0.27	0.16	0.19	0.11	0.15	0.18	0.22	0.29	0.09	0.31	0.23	0.3	0.37	0.54	0.27	0.25	0.09	0.18	0.55	0.08	0.3	0.21	0.18	0.12	0.16	0.14	0.2	0.28	0.13	0.12	0.26	0.2	0.21	0.21	0.21	0.21	0.21	0.1	0.11	0.16	0.12	0.17	0.17	0.16	0.17	0.23	0.11	0.46	0.51
6293372	0.27	0.2	0.26	0.14	0.19	0.27	0.23	0.28	0.12	0.45	0.32	0.31	0.39	0.57	0.25	0.25	0.12	0.18	0.7	0.08	0.31	0.18	0.26	0.14	0.16	0.22	0.24	0.38	0.15	0.16	0.33	0.26	0.3	0.3	0.3	0.3	0.3	0.14	0.11	0.17	0.15	0.23	0.23	0.22	0.23	0.32	0.14	0.51	0.56
6298636	0.3	0.15	0.2	0.14	0.15	0.2	0.24	0.23	0.12	0.47	0.26	0.25	0.31	0.48	0.21	0.2	0.1	0.14	0.62	0.06	0.24	0.17	0.2	0.12	0.17	0.2	0.21	0.31	0.18	0.17	0.28	0.28	0.24	0.24	0.24	0.24	0.24	0.13	0.12	0.18	0.16	0.24	0.24	0.22	0.24	0.33	0.15	0.41	0.46
6299917	0.22	0.33	0.39	0.16	0.31	0.29	0.31	0.29	0.15	0.21	0.29	0.29	0.37	0.34	0.2	0.25	0.18	0.17	0.29	0.14	0.4	0.3	0.25	0.16	0.11	0.12	0.3	0.35	0.17	0.13	0.28	0.15	0.17	0.17	0.17	0.17	0.17	0.16	0.13	0.15	0.1	0.13	0.13	0.13	0.13	0.27	0.09	0.47	0.46
6299961	0.24	0.31	0.38	0.17	0.3	0.28	0.33	0.27	0.15	0.23	0.28	0.31	0.45	0.37	0.21	0.24	0.18	0.17	0.33	0.15	0.38	0.29	0.23	0.15	0.12	0.13	0.28	0.41	0.17	0.14	0.29	0.16	0.19	0.19	0.19	0.19	0.19	0.17	0.14	0.16	0.1	0.14	0.14	0.14	0.14	0.28	0.1	0.51	0.51
6301411	0.17	0.4	0.5	0.2	0.38	0.47	0.19	0.29	0.16	0.49	0.45	0.29	0.43	0.32	0.2	0.25	0.26	0.17	0.43	0.1	0.36	0.29	0.36	0.17	0.11	0.24	0.44	0.68	0.12	0.14	0.37	0.22	0.34	0.34	0.34	0.34	0.34	0.18	0.09	0.13	0.12	0.29	0.26	0.19	0.29	0.39	0.11	0.47	0.46
6302953	0.14	0.54	0.45	0.17	0.52	0.43	0.15	0.32	0.14	0.42	0.3	0.2	0.27	0.3	0.18	0.25	0.24	0.14	0.36	0.1	0.29	0.3	0.33	0.18	0.1	0.21	0.37	0.6	0.11	0.14	0.35	0.18	0.3	0.3	0.3	0.3	0.3	0.17	0.09	0.11	0.11	0.25	0.23	0.17	0.25	0.27	0.1	0.3	0.3
6303459	0.24	0.28	0.38	0.15	0.27	0.35	0.21	0.25	0.11	0.72	0.33	0.27	0.34	0.47	0.22	0.22	0.17	0.17	0.68	0.08	0.27	0.16	0.32	0.14	0.14	0.28	0.33	0.56	0.14	0.15	0.34	0.28	0.46	0.46	0.46	0.46	0.46	0.13	0.11	0.16	0.14	0.37	0.33	0.23	0.37	0.29	0.13	0.42	0.46
6303492	0.29	0.19	0.25	0.13	0.18	0.23	0.25	0.31	0.11	0.45	0.31	0.34	0.41	0.64	0.27	0.26	0.11	0.19	0.76	0.08	0.33	0.17	0.25	0.15	0.17	0.19	0.24	0.37	0.15	0.16	0.32	0.27	0.31	0.31	0.31	0.31	0.31	0.13	0.12	0.17	0.16	0.23	0.23	0.21	0.23	0.32	0.15	0.56	0.63
6305844	0.13	0.1	0.12	0.14	0.1	0.12	0.19	0.14	0.14	0.14	0.19	0.15	0.15	0.21	0.14	0.14	0.11	0.12	0.2	0.06	0.14	0.11	0.12	0.14	0.09	0.26	0.14	0.15	0.09	0.08	0.14	0.11	0.14	0.14	0.14	0.14	0.14	0.14	0.08	0.1	0.13	0.11	0.1	0.1	0.11	0.14	0.13	0.2	0.21
6309982	0.23	0.27	0.21	0.13	0.26	0.19	0.19	0.4	0.11	0.21	0.24	0.26	0.29	0.44	0.22	0.29	0.19	0.17	0.32	0.13	0.41	0.27	0.2	0.18	0.11	0.12	0.22	0.33	0.15	0.11	0.31	0.15	0.17	0.17	0.17	0.17	0.17	0.15	0.12	0.14	0.1	0.14	0.14	0.13	0.14	0.24	0.1	0.37	0.38
6317438	0.09	0.37	0.33	0.2	0.4	0.37	0.11	0.17	0.19	0.19	0.26	0.14	0.2	0.16	0.11	0.16	0.27	0.1	0.19	0.1	0.2	0.32	0.24	0.16	0.06	0.14	0.29	0.31	0.09	0.1	0.21	0.12	0.16	0.16	0.16	0.16	0.16	0.19	0.06	0.08	0.09	0.13	0.13	0.11	0.13	0.21	0.09	0.22	0.19
6318412	0.1	0.48	0.43	0.16	0.48	0.35	0.17	0.19	0.15	0.22	0.22	0.15	0.21	0.19	0.12	0.18	0.24	0.1	0.21	0.13	0.29	0.3	0.25	0.17	0.07	0.16	0.41	0.32	0.1	0.12	0.23	0.13	0.18	0.18	0.18	0.18	0.18	0.17	0.08	0.1	0.08	0.15	0.15	0.14	0.15	0.19	0.08	0.21	0.2
6319203	0.14	0.54	0.45	0.17	0.51	0.43	0.15	0.32	0.14	0.42	0.3	0.2	0.27	0.3	0.18	0.25	0.24	0.14	0.36	0.1	0.29	0.3	0.33	0.18	0.1	0.21	0.37	0.6	0.11	0.14	0.35	0.18	0.3	0.3	0.3	0.3	0.3	0.17	0.09	0.11	0.11	0.25	0.23	0.17	0.25	0.27	0.1	0.3	0.3
6321151	0.07	0.28	0.28	0.15	0.3	0.3	0.09	0.1	0.16	0.19	0.14	0.1	0.18	0.11	0.09	0.09	0.22	0.07	0.15	0.08	0.15	0.21	0.15	0.1	0.05	0.2	0.26	0.29	0.07	0.08	0.17	0.1	0.15	0.15	0.15	0.15	0.15	0.13	0.06	0.07	0.07	0.13	0.13	0.11	0.13	0.13	0.07	0.15	0.13
6322421	0.09	0.46	0.4	0.15	0.49	0.35	0.14	0.16	0.15	0.19	0.19	0.13	0.19	0.16	0.1	0.15	0.25	0.09	0.18	0.12	0.25	0.28	0.22	0.16	0.06	0.16	0.36	0.29	0.09	0.11	0.2	0.11	0.16	0.16	0.16	0.16	0.16	0.16	0.07	0.09	0.08	0.13	0.14	0.12	0.13	0.16	0.07	0.19	0.17
6335920	0.19	0.33	0.33	0.15	0.32	0.3	0.2	0.34	0.13	0.32	0.3	0.26	0.31	0.45	0.21	0.29	0.21	0.17	0.41	0.12	0.48	0.25	0.27	0.2	0.12	0.15	0.32	0.34	0.13	0.17	0.31	0.19	0.22	0.22	0.22	0.22	0.22	0.17	0.1	0.14	0.12	0.17	0.17	0.17	0.17	0.3	0.12	0.38	0.39
6338984	0.25	0.27	0.29	0.14	0.26	0.2	0.25	0.28	0.12	0.25	0.24	0.23	0.28	0.54	0.19	0.25	0.15	0.15	0.38	0.15	0.33	0.25	0.19	0.15	0.12	0.14	0.23	0.27	0.22	0.15	0.25	0.17	0.19	0.19	0.19	0.19	0.19	0.16	0.14	0.17	0.11	0.15	0.15	0.15	0.15	0.29	0.1	0.35	0.36
6341258	0.35	0.1	0.13	0.14	0.1	0.12	0.23	0.18	0.12	0.25	0.17	0.19	0.21	0.3	0.16	0.16	0.07	0.12	0.29	0.06	0.18	0.11	0.2	0.11	0.13	0.13	0.14	0.18	0.12	0.11	0.17	0.17	0.15	0.15	0.15	0.15	0.15	0.13	0.1	0.14	0.14	0.15	0.15	0.14	0.15	0.16	0.13	0.27	0.29
6637019	0.19	0.15	0.19	0.11	0.15	0.18	0.18	0.25	0.09	0.21	0.23	0.26	0.27	0.33	0.21	0.22	0.1	0.17	0.31	0.08	0.26	0.16	0.19	0.12	0.12	0.11	0.18	0.24	0.11	0.11	0.22	0.15	0.18	0.18	0.18	0.18	0.18	0.11	0.09	0.13	0.1	0.14	0.13	0.13	0.14	0.23	0.1	0.38	0.41
52632189	0.11	0.6	0.69	0.17	0.61	0.88	0.13	0.19	0.16	0.32	0.25	0.24	0.23	0.19	0.13	0.17	0.24	0.11	0.23	0.09	0.22	0.31	0.3	0.15	0.08	0.22	0.34	0.38	0.09	0.12	0.24	0.14	0.23	0.23	0.23	0.23	0.23	0.16	0.07	0.09	0.1	0.19	0.18	0.14	0.19	0.21	0.09	0.28	0.25
60751354	0.09	0.74	0.58	0.17	0.75	0.72	0.11	0.21	0.16	0.26	0.22	0.2	0.2	0.17	0.11	0.17	0.28	0.1	0.2	0.1	0.22	0.35	0.26	0.16	0.06	0.19	0.32	0.39	0.08	0.1	0.24	0.12	0.2	0.2	0.2	0.2	0.2	0.17	0.06	0.08	0.09	0.16	0.16	0.12	0.16	0.18	0.08	0.23	0.2
60780654	0.13	0.48	0.54	0.19	0.49	0.65	0.15	0.22	0.18	0.38	0.29	0.21	0.3	0.22	0.15	0.19	0.27	0.13	0.27	0.09	0.26	0.36	0.32	0.16	0.08	0.25	0.39	0.48	0.1	0.13	0.27	0.16	0.26	0.26	0.26	0.26	0.26	0.18	0.08	0.1	0.1	0.22	0.2	0.15	0.22	0.25	0.1	0.34	0.29
60794987	0.11	0.57	0.63	0.18	0.58	0.76	0.13	0.19	0.17	0.32	0.26	0.18	0.25	0.19	0.13	0.17	0.27	0.12	0.23	0.09	0.24	0.35	0.29	0.15	0.08	0.23	0.36	0.41	0.09	0.12	0.25	0.14	0.23	0.23	0.23	0.23	0.23	0.17	0.07	0.09	0.09	0.19	0.19	0.14	0.19	0.22	0.09	0.28	0.25
60794998	0.11	0.57	0.63	0.18	0.58	0.76	0.13	0.19	0.17	0.32	0.26	0.18	0.25	0.19	0.13	0.17	0.27	0.12	0.23	0.09	0.24	0.35	0.29	0.15	0.08	0.23	0.36	0.41	0.09	0.12	0.25	0.14	0.23	0.23	0.23	0.23	0.23	0.17	0.07	0.09	0.09	0.19	0.19	0.14	0.19	0.22	0.09	0.28	0.25
61175567	0.15	0.3	0.36	0.17	0.28	0.35	0.17	0.25	0.13	0.33	0.39	0.25	0.29	0.27	0.17	0.22	0.18	0.15	0.35	0.13	0.29	0.23	0.36	0.15	0.1	0.19	0.33	0.42	0.11	0.13	0.32	0.19	0.25	0.25	0.25	0.25	0.25	0.15	0.09	0.12	0.11	0.21	0.2	0.17	0.21	0.32	0.11	0.38	0.38
96065750	0.31	0.25	0.29	0.23	0.24	0.28	0.16	0.21	0.19	0.22	0.37	0.28	0.25	0.22	0.2	0.24	0.21	0.18	0.28	0.15	0.24	0.2	0.49	0.19	0.09	0.16	0.32	0.33	0.1	0.11	0.28	0.16	0.2	0.2	0.2	0.2	0.2	0.23	0.08	0.1	0.1	0.16	0.16	0.15	0.16	0.22	0.1	0.29	0.3
96360068	0.11	0.57	0.68	0.17	0.57	0.86	0.13	0.17	0.16	0.31	0.25	0.24	0.23	0.18	0.12	0.16	0.23	0.11	0.23	0.11	0.21	0.28	0.3	0.15	0.07	0.22	0.31	0.38	0.09	0.12	0.24	0.14	0.23	0.23	0.23	0.23	0.23	0.16	0.07	0.09	0.1	0.19	0.18	0.13	0.19	0.21	0.09	0.28	0.24
101593264	0.12	0.24	0.28	0.11	0.23	0.3	0.12	0.12	0.09	0.31	0.18	0.13	0.15	0.19	0.11	0.11	0.15	0.1	0.24	0.06	0.13	0.12	0.19	0.1	0.08	0.73	0.23	0.29	0.09	0.1	0.2	0.15	0.25	0.25	0.25	0.25	0.25	0.1	0.08	0.1	0.09	0.2	0.2	0.16	0.2	0.17	0.09	0.18	0.18
126307711	0.26	0.22	0.26	0.14	0.21	0.21	0.25	0.27	0.12	0.26	0.26	0.26	0.31	0.47	0.21	0.23	0.15	0.17	0.38	0.12	0.3	0.22	0.2	0.14	0.13	0.14	0.23	0.3	0.22	0.15	0.28	0.17	0.2	0.2	0.2	0.2	0.2	0.14	0.15	0.17	0.11	0.16	0.15	0.16	0.16	0.31	0.11	0.41	0.42
374396208	0.17	0.12	0.15	0.11	0.12	0.14	0.13	0.11	0.08	0.24	0.17	0.12	0.14	0.18	0.11	0.11	0.09	0.09	0.27	0.05	0.12	0.1	0.19	0.09	0.1	0.15	0.15	0.19	0.1	0.11	0.18	0.18	0.17	0.17	0.17	0.17	0.17	0.09	0.08	0.11	0.11	0.17	0.17	0.16	0.17	0.15	0.1	0.17	0.18
1467867543	0.39	0.15	0.19	0.09	0.14	0.15	0.3	0.24	0.08	0.37	0.21	0.26	0.31	0.52	0.21	0.2	0.08	0.15	0.47	0.09	0.26	0.14	0.17	0.1	0.17	0.16	0.18	0.24	0.22	0.16	0.23	0.22	0.19	0.19	0.19	0.19	0.19	0.09	0.17	0.22	0.13	0.19	0.19	0.19	0.19	0.22	0.12	0.42	0.47
1467870760	0.28	0.18	0.24	0.14	0.17	0.23	0.23	0.22	0.12	0.55	0.27	0.23	0.29	0.43	0.19	0.19	0.1	0.14	0.55	0.07	0.23	0.18	0.24	0.12	0.16	0.21	0.25	0.31	0.18	0.2	0.28	0.26	0.23	0.23	0.23	0.23	0.23	0.13	0.12	0.17	0.15	0.23	0.23	0.22	0.23	0.34	0.14	0.38	0.41
1467871455	0.43	0.11	0.14	0.13	0.11	0.14	0.21	0.23	0.11	0.3	0.18	0.22	0.25	0.38	0.19	0.18	0.07	0.14	0.38	0.07	0.21	0.12	0.27	0.09	0.15	0.14	0.15	0.21	0.13	0.12	0.19	0.19	0.17	0.17	0.17	0.17	0.17	0.12	0.11	0.16	0.12	0.17	0.17	0.16	0.17	0.18	0.11	0.34	0.38
1467874093	0.11	0.62	0.71	0.17	0.63	0.92	0.13	0.19	0.16	0.32	0.26	0.24	0.24	0.19	0.13	0.17	0.24	0.11	0.24	0.09	0.22	0.32	0.29	0.15	0.08	0.23	0.34	0.39	0.09	0.12	0.25	0.15	0.24	0.24	0.24	0.24	0.24	0.16	0.07	0.09	0.1	0.19	0.19	0.14	0.19	0.22	0.09	0.29	0.25
1467874388	0.2	0.26	0.32	0.17	0.25	0.31	0.2	0.29	0.15	0.36	0.4	0.29	0.33	0.38	0.22	0.25	0.15	0.18	0.42	0.09	0.3	0.3	0.29	0.16	0.12	0.17	0.3	0.36	0.16	0.17	0.31	0.2	0.23	0.23	0.23	0.23	0.23	0.17	0.1	0.14	0.13	0.18	0.18	0.18	0.18	0.53	0.12	0.44	0.46
1467874399	0.52	0.2	0.25	0.18	0.19	0.24	0.17	0.16	0.14	0.44	0.23	0.16	0.2	0.26	0.14	0.14	0.12	0.11	0.4	0.07	0.16	0.11	0.48	0.1	0.12	0.25	0.23	0.32	0.12	0.14	0.24	0.24	0.26	0.26	0.26	0.26	0.26	0.16	0.1	0.14	0.13	0.26	0.26	0.2	0.26	0.19	0.12	0.24	0.25
1467874888	0.35	0.15	0.2	0.12	0.15	0.16	0.28	0.22	0.1	0.36	0.22	0.23	0.28	0.45	0.19	0.19	0.09	0.14	0.43	0.09	0.23	0.17	0.17	0.1	0.16	0.17	0.18	0.25	0.27	0.17	0.23	0.22	0.19	0.19	0.19	0.19	0.19	0.11	0.17	0.21	0.13	0.19	0.19	0.19	0.19	0.26	0.12	0.38	0.41
1467876868	0.27	0.1	0.13	0.07	0.09	0.12	0.2	0.28	0.06	0.32	0.17	0.3	0.36	0.45	0.25	0.23	0.06	0.16	0.44	0.05	0.28	0.1	0.13	0.08	0.2	0.12	0.13	0.2	0.12	0.11	0.18	0.18	0.16	0.16	0.16	0.16	0.16	0.07	0.09	0.14	0.1	0.16	0.15	0.14	0.16	0.17	0.1	0.38	0.44
1467877551	0.34	0.12	0.16	0.09	0.12	0.15	0.26	0.26	0.08	0.42	0.21	0.29	0.35	0.57	0.24	0.22	0.08	0.16	0.56	0.06	0.27	0.13	0.17	0.1	0.19	0.16	0.17	0.25	0.15	0.14	0.23	0.23	0.2	0.2	0.2	0.2	0.2	0.09	0.12	0.19	0.13	0.2	0.2	0.18	0.2	0.22	0.12	0.49	0.56
1467877736	0.23	0.17	0.21	0.13	0.16	0.2	0.19	0.18	0.12	0.42	0.23	0.19	0.23	0.32	0.16	0.16	0.1	0.13	0.4	0.06	0.19	0.16	0.21	0.11	0.14	0.18	0.22	0.26	0.17	0.18	0.24	0.23	0.2	0.2	0.2	0.2	0.2	0.12	0.11	0.15	0.14	0.2	0.2	0.19	0.2	0.29	0.13	0.3	0.31
1467878092	0.21	0.16	0.2	0.13	0.15	0.2	0.19	0.17	0.11	0.39	0.22	0.18	0.22	0.3	0.15	0.15	0.1	0.13	0.37	0.06	0.18	0.16	0.2	0.1	0.13	0.18	0.21	0.24	0.16	0.17	0.23	0.22	0.2	0.2	0.2	0.2	0.2	0.12	0.11	0.15	0.13	0.2	0.19	0.19	0.2	0.28	0.13	0.28	0.29
1467879150	0.25	0.2	0.26	0.15	0.19	0.22	0.21	0.16	0.12	0.41	0.25	0.17	0.21	0.29	0.15	0.14	0.14	0.11	0.42	0.08	0.17	0.16	0.21	0.11	0.12	0.25	0.27	0.29	0.22	0.17	0.32	0.24	0.23	0.23	0.23	0.23	0.23	0.12	0.14	0.17	0.13	0.23	0.23	0.28	0.23	0.27	0.12	0.26	0.27
1467879396	0.19	0.22	0.21	0.2	0.21	0.18	0.28	0.26	0.18	0.19	0.27	0.26	0.24	0.27	0.24	0.25	0.18	0.18	0.26	0.14	0.24	0.23	0.19	0.22	0.1	0.12	0.25	0.28	0.19	0.12	0.27	0.14	0.15	0.15	0.15	0.15	0.15	0.19	0.13	0.14	0.15	0.13	0.12	0.13	0.13	0.24	0.15	0.28	0.29
1467880692	0.11	0.62	0.71	0.17	0.63	0.92	0.13	0.19	0.16	0.32	0.26	0.24	0.24	0.19	0.13	0.17	0.24	0.11	0.24	0.09	0.22	0.32	0.29	0.15	0.08	0.23	0.34	0.39	0.09	0.12	0.25	0.15	0.24	0.24	0.24	0.24	0.24	0.16	0.07	0.09	0.1	0.19	0.19	0.14	0.19	0.22	0.09	0.29	0.25
1467881830	0.07	0.29	0.27	0.14	0.31	0.29	0.08	0.1	0.15	0.18	0.14	0.09	0.16	0.1	0.08	0.09	0.23	0.07	0.13	0.08	0.13	0.19	0.17	0.1	0.05	0.16	0.24	0.26	0.06	0.08	0.16	0.09	0.14	0.14	0.14	0.14	0.14	0.13	0.05	0.06	0.06	0.12	0.12	0.09	0.12	0.12	0.06	0.13	0.12
1467882579	0.11	0.62	0.71	0.17	0.63	0.92	0.13	0.19	0.16	0.32	0.26	0.24	0.24	0.19	0.13	0.17	0.24	0.11	0.24	0.09	0.22	0.32	0.29	0.15	0.08	0.23	0.34	0.39	0.09	0.12	0.25	0.15	0.24	0.24	0.24	0.24	0.24	0.16	0.07	0.09	0.1	0.19	0.19	0.14	0.19	0.22	0.09	0.29	0.25
1467884040	0.23	0.28	0.38	0.13	0.27	0.35	0.2	0.18	0.1	1	0.28	0.2	0.25	0.33	0.17	0.16	0.15	0.12	0.53	0.06	0.19	0.13	0.29	0.11	0.14	0.29	0.33	0.47	0.14	0.18	0.29	0.28	0.36	0.36	0.36	0.36	0.36	0.1	0.11	0.15	0.14	0.36	0.32	0.23	0.36	0.24	0.13	0.3	0.32
1467885606	0.06	0.3	0.24	0.16	0.32	0.27	0.08	0.11	0.18	0.14	0.19	0.09	0.14	0.11	0.07	0.11	0.29	0.06	0.12	0.08	0.13	0.24	0.15	0.12	0.04	0.15	0.21	0.24	0.06	0.07	0.15	0.08	0.13	0.13	0.13	0.13	0.13	0.16	0.05	0.06	0.06	0.11	0.1	0.08	0.11	0.14	0.06	0.13	0.11
1467888594	0.11	0.62	0.71	0.17	0.63	0.92	0.13	0.19	0.16	0.32	0.26	0.24	0.24	0.19	0.13	0.17	0.24	0.11	0.24	0.09	0.22	0.32	0.29	0.15	0.08	0.23	0.34	0.39	0.09	0.12	0.25	0.15	0.24	0.24	0.24	0.24	0.24	0.16	0.07	0.09	0.1	0.19	0.19	0.14	0.19	0.22	0.09	0.29	0.25
1467889184	0.32	0.18	0.23	0.14	0.17	0.19	0.26	0.2	0.12	0.4	0.24	0.21	0.26	0.4	0.18	0.17	0.1	0.13	0.48	0.09	0.21	0.17	0.2	0.12	0.15	0.2	0.21	0.28	0.25	0.19	0.26	0.25	0.22	0.22	0.22	0.22	0.22	0.13	0.16	0.2	0.14	0.22	0.21	0.21	0.22	0.31	0.14	0.34	0.36
1467889321	0.29	0.18	0.23	0.14	0.17	0.21	0.24	0.18	0.12	0.38	0.24	0.19	0.24	0.35	0.17	0.16	0.11	0.12	0.43	0.09	0.2	0.17	0.19	0.11	0.14	0.22	0.21	0.27	0.24	0.18	0.26	0.24	0.21	0.21	0.21	0.21	0.21	0.13	0.15	0.19	0.14	0.21	0.21	0.21	0.21	0.3	0.13	0.31	0.33
1467889778	0.31	0.19	0.19	0.18	0.18	0.18	0.18	0.44	0.16	0.22	0.24	0.27	0.31	0.36	0.24	0.25	0.11	0.18	0.35	0.1	0.29	0.2	0.31	0.13	0.12	0.12	0.2	0.34	0.12	0.11	0.31	0.16	0.18	0.18	0.18	0.18	0.18	0.17	0.1	0.14	0.1	0.14	0.14	0.13	0.14	0.23	0.1	0.38	0.41
1467890527	0.23	0.26	0.33	0.15	0.24	0.3	0.23	0.33	0.13	0.41	0.35	0.33	0.36	0.48	0.25	0.28	0.17	0.2	0.5	0.1	0.42	0.21	0.3	0.17	0.14	0.17	0.34	0.38	0.15	0.19	0.35	0.22	0.24	0.24	0.24	0.24	0.24	0.14	0.11	0.16	0.14	0.2	0.2	0.19	0.2	0.34	0.13	0.49	0.52
1467891337	0.25	0.24	0.31	0.13	0.22	0.26	0.26	0.2	0.1	0.61	0.3	0.21	0.27	0.4	0.18	0.17	0.12	0.13	0.59	0.07	0.21	0.15	0.27	0.11	0.15	0.26	0.33	0.35	0.17	0.22	0.33	0.29	0.26	0.26	0.26	0.26	0.26	0.11	0.13	0.2	0.14	0.26	0.27	0.28	0.26	0.26	0.14	0.34	0.36
1467892036	0.23	0.22	0.22	0.15	0.21	0.18	0.26	0.31	0.14	0.21	0.36	0.4	0.28	0.34	0.36	0.36	0.18	0.25	0.32	0.18	0.28	0.2	0.19	0.21	0.11	0.12	0.31	0.32	0.17	0.13	0.3	0.15	0.17	0.17	0.17	0.17	0.17	0.15	0.14	0.16	0.11	0.14	0.14	0.14	0.14	0.23	0.11	0.34	0.36
1467895358	0.29	0.2	0.26	0.16	0.19	0.22	0.24	0.18	0.12	0.46	0.27	0.19	0.25	0.35	0.17	0.16	0.12	0.12	0.52	0.09	0.2	0.17	0.23	0.11	0.14	0.23	0.25	0.32	0.24	0.18	0.3	0.27	0.25	0.25	0.25	0.25	0.25	0.13	0.15	0.19	0.14	0.25	0.25	0.24	0.25	0.3	0.13	0.31	0.33
1467896450	0.29	0.19	0.25	0.13	0.18	0.23	0.26	0.4	0.11	0.34	0.32	0.43	0.49	0.66	0.33	0.34	0.11	0.24	0.59	0.09	0.43	0.2	0.25	0.15	0.17	0.15	0.23	0.36	0.14	0.13	0.31	0.21	0.24	0.24	0.24	0.24	0.24	0.13	0.12	0.17	0.12	0.18	0.18	0.17	0.18	0.33	0.12	0.75	0.85
1467896566	0.05	0.26	0.21	0.12	0.28	0.24	0.06	0.09	0.12	0.12	0.13	0.07	0.12	0.09	0.06	0.09	0.21	0.06	0.1	0.07	0.11	0.19	0.13	0.1	0.04	0.13	0.18	0.2	0.05	0.06	0.13	0.07	0.11	0.11	0.11	0.11	0.11	0.12	0.04	0.05	0.05	0.09	0.09	0.07	0.09	0.12	0.05	0.11	0.09
1467897164	0.27	0.21	0.24	0.13	0.2	0.19	0.25	0.3	0.11	0.25	0.24	0.28	0.35	0.42	0.26	0.26	0.13	0.18	0.4	0.13	0.38	0.18	0.2	0.15	0.13	0.13	0.27	0.3	0.18	0.14	0.29	0.17	0.19	0.19	0.19	0.19	0.19	0.12	0.15	0.18	0.11	0.15	0.15	0.15	0.15	0.24	0.1	0.41	0.44
1467897717	0.42	0.12	0.16	0.11	0.11	0.15	0.24	0.25	0.1	0.38	0.2	0.27	0.32	0.51	0.22	0.21	0.07	0.15	0.5	0.06	0.25	0.13	0.2	0.1	0.18	0.15	0.16	0.24	0.15	0.13	0.22	0.22	0.19	0.19	0.19	0.19	0.19	0.11	0.12	0.18	0.13	0.19	0.19	0.17	0.19	0.21	0.12	0.44	0.5
1467898993	0.25	0.26	0.34	0.17	0.24	0.32	0.24	0.34	0.13	0.48	0.41	0.37	0.46	0.54	0.28	0.3	0.15	0.22	0.76	0.09	0.37	0.21	0.35	0.17	0.15	0.21	0.3	0.48	0.14	0.16	0.4	0.3	0.34	0.34	0.34	0.34	0.34	0.15	0.11	0.17	0.15	0.26	0.25	0.23	0.26	0.36	0.14	0.6	0.66
1467900672	0.21	0.19	0.2	0.17	0.18	0.19	0.3	0.36	0.15	0.23	0.32	0.35	0.32	0.38	0.32	0.33	0.16	0.22	0.37	0.1	0.3	0.21	0.2	0.22	0.13	0.12	0.26	0.35	0.12	0.11	0.32	0.16	0.18	0.18	0.18	0.18	0.18	0.17	0.1	0.14	0.16	0.15	0.14	0.13	0.15	0.24	0.16	0.4	0.44
1467901682	0.08	0.33	0.31	0.19	0.35	0.33	0.1	0.12	0.2	0.21	0.21	0.11	0.19	0.12	0.09	0.11	0.3	0.08	0.16	0.08	0.15	0.24	0.2	0.13	0.05	0.19	0.29	0.31	0.07	0.09	0.19	0.1	0.16	0.16	0.16	0.16	0.16	0.17	0.06	0.07	0.08	0.14	0.14	0.11	0.14	0.15	0.08	0.16	0.14
1467903567	0.18	0.18	0.18	0.16	0.17	0.17	0.27	0.32	0.15	0.2	0.29	0.31	0.28	0.32	0.29	0.29	0.15	0.21	0.31	0.1	0.27	0.19	0.18	0.21	0.12	0.11	0.24	0.32	0.11	0.11	0.29	0.15	0.17	0.17	0.17	0.17	0.17	0.16	0.09	0.13	0.15	0.13	0.13	0.12	0.13	0.22	0.15	0.35	0.37
1467903799	0.17	0.25	0.24	0.19	0.24	0.23	0.26	0.29	0.17	0.27	0.35	0.31	0.27	0.29	0.28	0.3	0.21	0.2	0.34	0.12	0.25	0.21	0.23	0.24	0.1	0.14	0.33	0.36	0.12	0.15	0.34	0.17	0.19	0.19	0.19	0.19	0.19	0.19	0.09	0.12	0.16	0.16	0.16	0.15	0.16	0.26	0.16	0.32	0.32
1467903850	0.19	0.23	0.22	0.2	0.22	0.22	0.29	0.33	0.18	0.27	0.38	0.37	0.31	0.34	0.33	0.34	0.19	0.23	0.41	0.11	0.29	0.21	0.22	0.26	0.12	0.14	0.31	0.4	0.12	0.13	0.37	0.19	0.21	0.21	0.21	0.21	0.21	0.19	0.1	0.13	0.18	0.17	0.17	0.16	0.17	0.27	0.17	0.38	0.4
1467903860	0.19	0.2	0.2	0.2	0.19	0.19	0.28	0.32	0.18	0.22	0.3	0.31	0.29	0.33	0.29	0.3	0.17	0.21	0.33	0.11	0.27	0.24	0.2	0.22	0.12	0.12	0.27	0.33	0.14	0.11	0.31	0.16	0.18	0.18	0.18	0.18	0.18	0.2	0.1	0.13	0.16	0.14	0.14	0.14	0.14	0.27	0.16	0.35	0.37
1467904336	0.17	0.17	0.17	0.16	0.16	0.16	0.24	0.28	0.14	0.18	0.26	0.27	0.25	0.28	0.26	0.26	0.14	0.19	0.27	0.1	0.24	0.18	0.17	0.19	0.11	0.11	0.22	0.28	0.1	0.1	0.27	0.14	0.15	0.15	0.15	0.15	0.15	0.15	0.09	0.12	0.14	0.12	0.12	0.12	0.12	0.2	0.14	0.3	0.32
1467904571	0.13	0.37	0.39	0.18	0.37	0.39	0.15	0.27	0.16	0.29	0.27	0.19	0.27	0.21	0.13	0.18	0.22	0.13	0.25	0.1	0.28	0.3	0.29	0.15	0.08	0.18	0.36	0.41	0.1	0.11	0.25	0.15	0.25	0.25	0.25	0.25	0.25	0.17	0.08	0.1	0.09	0.2	0.19	0.14	0.2	0.22	0.09	0.31	0.27
1467905270	0.13	0.37	0.4	0.18	0.37	0.39	0.15	0.27	0.16	0.3	0.28	0.19	0.27	0.21	0.14	0.18	0.23	0.13	0.26	0.1	0.29	0.3	0.29	0.15	0.08	0.18	0.37	0.42	0.1	0.11	0.26	0.16	0.25	0.25	0.25	0.25	0.25	0.17	0.08	0.1	0.1	0.21	0.19	0.15	0.21	0.23	0.09	0.32	0.28
1467905866	0.13	0.37	0.39	0.18	0.37	0.39	0.15	0.27	0.16	0.29	0.27	0.19	0.27	0.21	0.13	0.18	0.22	0.13	0.25	0.1	0.28	0.3	0.29	0.15	0.08	0.18	0.36	0.41	0.1	0.11	0.26	0.15	0.25	0.25	0.25	0.25	0.25	0.17	0.08	0.1	0.09	0.21	0.19	0.14	0.21	0.22	0.09	0.31	0.27
1467907384	0.11	0.48	0.51	0.17	0.49	0.53	0.13	0.19	0.17	0.32	0.26	0.17	0.26	0.19	0.13	0.17	0.27	0.11	0.23	0.09	0.26	0.32	0.29	0.15	0.08	0.18	0.38	0.43	0.09	0.12	0.24	0.14	0.23	0.23	0.23	0.23	0.23	0.16	0.07	0.09	0.09	0.19	0.18	0.14	0.19	0.22	0.09	0.28	0.25
1467913802	0.13	0.27	0.32	0.22	0.26	0.33	0.17	0.21	0.2	0.24	0.59	0.28	0.27	0.22	0.2	0.24	0.3	0.18	0.28	0.11	0.26	0.24	0.27	0.21	0.09	0.19	0.39	0.35	0.1	0.12	0.28	0.17	0.21	0.21	0.21	0.21	0.21	0.2	0.08	0.1	0.12	0.16	0.16	0.16	0.16	0.3	0.12	0.3	0.3
1467914230	0.13	0.39	0.42	0.18	0.39	0.41	0.16	0.26	0.15	0.32	0.29	0.2	0.29	0.23	0.14	0.19	0.23	0.14	0.28	0.1	0.31	0.31	0.29	0.16	0.09	0.19	0.39	0.45	0.1	0.12	0.27	0.16	0.27	0.27	0.27	0.27	0.27	0.16	0.08	0.11	0.1	0.22	0.2	0.15	0.22	0.24	0.1	0.34	0.3
1467920241	0.14	0.16	0.15	0.14	0.15	0.15	0.21	0.24	0.13	0.15	0.23	0.23	0.2	0.23	0.22	0.22	0.13	0.17	0.22	0.09	0.2	0.16	0.15	0.18	0.09	0.1	0.19	0.24	0.09	0.09	0.23	0.12	0.14	0.14	0.14	0.14	0.14	0.14	0.08	0.11	0.13	0.11	0.11	0.1	0.11	0.17	0.13	0.25	0.26
1467920837	0.05	0.26	0.21	0.12	0.28	0.24	0.06	0.09	0.12	0.12	0.13	0.07	0.12	0.09	0.06	0.09	0.21	0.06	0.1	0.07	0.11	0.19	0.13	0.1	0.04	0.13	0.18	0.2	0.05	0.06	0.13	0.07	0.11	0.11	0.11	0.11	0.11	0.12	0.04	0.05	0.05	0.09	0.09	0.07	0.09	0.12	0.05	0.11	0.09
1467921379	0.07	0.29	0.23	0.21	0.3	0.24	0.11	0.13	0.23	0.15	0.23	0.14	0.16	0.12	0.12	0.15	0.97	0.1	0.13	0.12	0.17	0.23	0.16	0.24	0.05	0.13	0.32	0.27	0.06	0.07	0.17	0.09	0.14	0.14	0.14	0.14	0.14	0.21	0.05	0.06	0.1	0.12	0.12	0.1	0.12	0.13	0.1	0.14	0.13
1467921677	0.23	0.22	0.29	0.13	0.21	0.27	0.2	0.18	0.1	0.65	0.28	0.2	0.25	0.33	0.17	0.16	0.13	0.12	0.53	0.06	0.19	0.13	0.35	0.11	0.14	0.25	0.29	0.37	0.14	0.18	0.28	0.28	0.29	0.29	0.29	0.29	0.29	0.11	0.11	0.15	0.14	0.29	0.29	0.23	0.29	0.24	0.13	0.3	0.32
1467922989	0.17	0.15	0.16	0.88	0.15	0.16	0.19	0.12	0.78	0.11	0.17	0.15	0.16	0.12	0.12	0.12	0.19	0.09	0.14	0.12	0.14	0.19	0.22	0.2	0.05	0.08	0.18	0.21	0.08	0.08	0.16	0.09	0.1	0.1	0.1	0.1	0.1	0.95	0.06	0.07	0.15	0.09	0.09	0.09	0.09	0.15	0.15	0.15	0.14
1467923090	0.23	0.19	0.24	0.14	0.18	0.23	0.23	0.18	0.11	0.53	0.42	0.2	0.25	0.33	0.17	0.16	0.12	0.12	0.53	0.06	0.19	0.14	0.25	0.13	0.14	0.22	0.26	0.31	0.14	0.18	0.28	0.28	0.25	0.25	0.25	0.25	0.25	0.12	0.11	0.15	0.17	0.25	0.24	0.23	0.25	0.24	0.16	0.3	0.32
1467923515	0.15	0.4	0.49	0.19	0.38	0.46	0.17	0.25	0.16	0.48	0.4	0.25	0.36	0.27	0.17	0.22	0.27	0.15	0.36	0.09	0.31	0.29	0.33	0.16	0.1	0.24	0.41	0.61	0.11	0.13	0.33	0.19	0.31	0.31	0.31	0.31	0.31	0.17	0.09	0.12	0.11	0.26	0.24	0.18	0.26	0.34	0.11	0.39	0.38
1467928690	0.16	0.08	0.1	0.06	0.08	0.09	0.14	0.17	0.05	0.18	0.12	0.18	0.19	0.22	0.16	0.15	0.05	0.55	0.21	0.04	0.17	0.08	0.1	0.06	0.13	0.1	0.1	0.13	0.09	0.09	0.12	0.13	0.11	0.11	0.11	0.11	0.11	0.06	0.08	0.11	0.08	0.11	0.11	0.11	0.11	0.12	0.08	0.2	0.21
1467930659	0.23	0.19	0.24	0.15	0.18	0.23	0.23	0.18	0.12	0.53	0.46	0.2	0.25	0.33	0.17	0.16	0.13	0.12	0.53	0.06	0.19	0.14	0.25	0.13	0.14	0.22	0.26	0.31	0.14	0.18	0.28	0.28	0.25	0.25	0.25	0.25	0.25	0.12	0.11	0.15	0.17	0.25	0.24	0.23	0.25	0.24	0.16	0.3	0.32
1467938722	0.07	0.26	0.28	0.13	0.26	0.3	0.09	0.1	0.12	0.19	0.17	0.11	0.16	0.11	0.08	0.09	0.19	0.08	0.14	0.07	0.12	0.2	0.16	0.09	0.05	0.18	0.21	0.25	0.07	0.08	0.16	0.1	0.15	0.15	0.15	0.15	0.15	0.12	0.06	0.07	0.07	0.13	0.13	0.11	0.13	0.17	0.06	0.16	0.14
1467938783	0.06	0.34	0.26	0.12	0.35	0.28	0.08	0.13	0.13	0.15	0.14	0.09	0.14	0.11	0.07	0.11	0.23	0.07	0.12	0.08	0.14	0.23	0.17	0.11	0.04	0.15	0.2	0.25	0.06	0.07	0.16	0.08	0.13	0.13	0.13	0.13	0.13	0.12	0.05	0.06	0.06	0.11	0.11	0.09	0.11	0.12	0.06	0.14	0.12
1467938918	0.11	0.26	0.27	0.15	0.26	0.26	0.13	0.16	0.15	0.14	0.19	0.16	0.25	0.17	0.12	0.15	0.21	0.11	0.16	0.1	0.3	0.36	0.19	0.14	0.07	0.11	0.24	0.27	0.11	0.09	0.19	0.1	0.13	0.13	0.13	0.13	0.13	0.14	0.08	0.09	0.08	0.1	0.11	0.1	0.1	0.2	0.07	0.26	0.23
1467943375	0.08	0.3	0.29	0.2	0.32	0.33	0.1	0.12	0.22	0.2	0.23	0.14	0.2	0.12	0.13	0.15	0.36	0.11	0.16	0.11	0.15	0.22	0.19	0.16	0.06	0.17	0.36	0.31	0.08	0.08	0.19	0.11	0.16	0.16	0.16	0.16	0.16	0.18	0.06	0.07	0.08	0.14	0.14	0.11	0.14	0.16	0.08	0.16	0.15
1467958248	0.09	0.34	0.29	0.18	0.36	0.31	0.1	0.2	0.18	0.16	0.17	0.12	0.19	0.14	0.09	0.14	0.27	0.08	0.16	0.14	0.24	0.28	0.22	0.15	0.05	0.16	0.28	0.27	0.08	0.08	0.19	0.1	0.15	0.15	0.15	0.15	0.15	0.19	0.06	0.07	0.07	0.12	0.13	0.11	0.12	0.17	0.07	0.18	0.16
1467958299	0.12	0.31	0.31	0.17	0.32	0.31	0.19	0.19	0.18	0.14	0.21	0.16	0.22	0.17	0.12	0.15	0.21	0.1	0.18	0.13	0.24	0.32	0.2	0.15	0.07	0.12	0.26	0.25	0.13	0.11	0.2	0.11	0.13	0.13	0.13	0.13	0.13	0.17	0.09	0.1	0.08	0.11	0.11	0.11	0.11	0.22	0.08	0.24	0.21
1467958347	0.15	0.25	0.29	0.21	0.25	0.24	0.25	0.13	0.18	0.2	0.28	0.15	0.19	0.2	0.12	0.13	0.21	0.1	0.25	0.11	0.17	0.21	0.2	0.2	0.08	0.15	0.22	0.26	0.15	0.12	0.21	0.15	0.18	0.18	0.18	0.18	0.18	0.19	0.11	0.11	0.18	0.15	0.14	0.15	0.15	0.22	0.17	0.21	0.21
1467958545	0.1	0.29	0.29	0.27	0.29	0.29	0.14	0.15	0.25	0.23	0.29	0.19	0.22	0.15	0.18	0.18	0.65	0.13	0.21	0.12	0.19	0.23	0.21	0.23	0.07	0.17	0.42	0.4	0.08	0.09	0.24	0.13	0.2	0.2	0.2	0.2	0.2	0.24	0.07	0.08	0.13	0.17	0.16	0.14	0.17	0.17	0.13	0.19	0.19
1467959846	0.23	0.22	0.22	0.15	0.21	0.18	0.26	0.31	0.14	0.21	0.37	0.41	0.29	0.34	0.36	0.37	0.18	0.26	0.32	0.18	0.29	0.2	0.19	0.21	0.12	0.12	0.31	0.32	0.17	0.13	0.3	0.15	0.17	0.17	0.17	0.17	0.17	0.15	0.14	0.16	0.11	0.14	0.14	0.14	0.14	0.23	0.11	0.35	0.37
1467961253	0.14	0.31	0.35	0.17	0.31	0.31	0.25	0.13	0.15	0.23	0.21	0.15	0.18	0.18	0.12	0.13	0.2	0.1	0.23	0.12	0.17	0.2	0.22	0.14	0.07	0.21	0.29	0.29	0.15	0.12	0.21	0.14	0.2	0.2	0.2	0.2	0.2	0.15	0.1	0.11	0.09	0.16	0.17	0.16	0.16	0.21	0.09	0.2	0.19
1467971956	0.52	0.2	0.25	0.18	0.19	0.24	0.17	0.16	0.14	0.44	0.23	0.16	0.2	0.26	0.14	0.14	0.12	0.11	0.4	0.07	0.16	0.11	0.48	0.1	0.12	0.25	0.23	0.32	0.12	0.14	0.24	0.24	0.26	0.26	0.26	0.26	0.26	0.16	0.1	0.14	0.13	0.26	0.26	0.2	0.26	0.19	0.12	0.24	0.25
1467972909	0.15	0.24	0.29	0.2	0.23	0.27	0.22	0.25	0.17	0.28	0.86	0.36	0.25	0.27	0.27	0.32	0.24	0.24	0.35	0.12	0.26	0.2	0.28	0.24	0.1	0.17	0.38	0.33	0.11	0.13	0.29	0.19	0.22	0.22	0.22	0.22	0.22	0.18	0.09	0.12	0.14	0.18	0.18	0.17	0.18	0.33	0.14	0.32	0.33
1467974398	0.24	0.28	0.38	0.15	0.27	0.35	0.21	0.25	0.11	0.72	0.33	0.27	0.34	0.47	0.22	0.22	0.17	0.17	0.68	0.08	0.27	0.16	0.32	0.14	0.14	0.28	0.33	0.56	0.14	0.15	0.34	0.28	0.46	0.46	0.46	0.46	0.46	0.13	0.11	0.16	0.14	0.37	0.33	0.23	0.37	0.29	0.13	0.42	0.46
1467976120	0.14	0.52	0.66	0.19	0.52	0.83	0.16	0.22	0.17	0.42	0.3	0.31	0.3	0.23	0.16	0.19	0.25	0.14	0.31	0.09	0.26	0.3	0.34	0.17	0.09	0.27	0.36	0.48	0.11	0.14	0.3	0.18	0.29	0.29	0.29	0.29	0.29	0.17	0.08	0.11	0.11	0.23	0.22	0.16	0.23	0.25	0.11	0.38	0.33
1467976132	0.12	0.62	0.76	0.18	0.63	0.98	0.14	0.19	0.17	0.36	0.28	0.27	0.26	0.2	0.14	0.17	0.25	0.12	0.26	0.09	0.24	0.3	0.31	0.16	0.08	0.24	0.34	0.42	0.1	0.12	0.26	0.16	0.25	0.25	0.25	0.25	0.25	0.16	0.08	0.1	0.1	0.21	0.2	0.15	0.21	0.23	0.1	0.32	0.28
1467976142	0.12	0.63	0.76	0.17	0.63	0.97	0.14	0.19	0.16	0.34	0.27	0.26	0.25	0.19	0.13	0.17	0.24	0.12	0.25	0.09	0.23	0.31	0.3	0.16	0.08	0.24	0.35	0.41	0.1	0.12	0.26	0.15	0.25	0.25	0.25	0.25	0.25	0.16	0.08	0.1	0.1	0.2	0.2	0.15	0.2	0.23	0.1	0.31	0.27
1467976152	0.11	0.62	0.71	0.17	0.63	0.92	0.13	0.19	0.16	0.32	0.26	0.24	0.24	0.19	0.13	0.17	0.24	0.11	0.24	0.09	0.22	0.32	0.29	0.15	0.08	0.23	0.34	0.39	0.09	0.12	0.25	0.15	0.24	0.24	0.24	0.24	0.24	0.16	0.07	0.09	0.1	0.19	0.19	0.14	0.19	0.22	0.09	0.29	0.25
1467976349	0.3	0.24	0.31	0.15	0.22	0.29	0.2	0.19	0.11	0.7	0.26	0.2	0.25	0.34	0.17	0.16	0.15	0.13	0.54	0.06	0.19	0.13	0.3	0.11	0.14	0.28	0.29	0.45	0.14	0.15	0.28	0.28	0.36	0.36	0.36	0.36	0.36	0.12	0.11	0.16	0.14	0.36	0.33	0.23	0.36	0.23	0.13	0.3	0.33
1467977639	0.13	0.74	0.99	0.18	0.71	0.78	0.2	0.2	0.15	0.38	0.28	0.28	0.25	0.22	0.14	0.18	0.24	0.13	0.27	0.11	0.26	0.3	0.33	0.17	0.08	0.23	0.37	0.44	0.12	0.14	0.27	0.16	0.26	0.26	0.26	0.26	0.26	0.17	0.09	0.12	0.11	0.22	0.21	0.16	0.22	0.24	0.1	0.3	0.29
1467978162	0.15	0.61	0.81	0.18	0.58	0.63	0.23	0.24	0.15	0.46	0.32	0.34	0.29	0.27	0.16	0.21	0.23	0.14	0.33	0.12	0.29	0.29	0.36	0.18	0.1	0.25	0.4	0.49	0.13	0.16	0.31	0.19	0.3	0.3	0.3	0.3	0.3	0.17	0.1	0.13	0.12	0.25	0.23	0.17	0.25	0.27	0.11	0.35	0.36
1467978551	0.14	0.15	0.16	0.12	0.14	0.15	0.2	0.18	0.12	0.15	0.33	0.3	0.19	0.22	0.43	0.39	0.17	0.36	0.2	0.15	0.26	0.14	0.15	0.33	0.09	0.09	0.25	0.18	0.09	0.09	0.17	0.11	0.14	0.14	0.14	0.14	0.14	0.12	0.08	0.11	0.1	0.11	0.11	0.1	0.11	0.18	0.11	0.25	0.27
1467980511	0.1	0.23	0.24	0.17	0.22	0.24	0.16	0.14	0.14	0.24	0.24	0.15	0.17	0.16	0.23	0.23	0.25	0.17	0.22	0.14	0.15	0.14	0.19	0.3	0.07	0.17	0.24	0.3	0.08	0.09	0.2	0.13	0.21	0.21	0.21	0.21	0.21	0.15	0.07	0.09	0.16	0.18	0.17	0.13	0.18	0.16	0.16	0.17	0.18
1467980523	0.1	0.29	0.3	0.28	0.29	0.3	0.14	0.15	0.26	0.24	0.31	0.2	0.24	0.16	0.19	0.19	0.61	0.13	0.22	0.12	0.2	0.23	0.22	0.24	0.07	0.17	0.44	0.43	0.09	0.1	0.23	0.13	0.21	0.21	0.21	0.21	0.21	0.25	0.07	0.09	0.13	0.18	0.17	0.13	0.18	0.17	0.13	0.21	0.2
1467980545	0.07	0.29	0.24	0.21	0.31	0.25	0.11	0.13	0.24	0.15	0.23	0.14	0.16	0.12	0.12	0.15	1	0.1	0.13	0.12	0.18	0.23	0.17	0.24	0.05	0.13	0.33	0.28	0.07	0.07	0.18	0.09	0.14	0.14	0.14	0.14	0.14	0.21	0.06	0.06	0.1	0.12	0.12	0.1	0.12	0.13	0.1	0.15	0.13
1467980662	0.16	0.15	0.19	0.19	0.15	0.18	0.19	0.12	0.15	0.28	0.31	0.14	0.15	0.2	0.11	0.11	0.17	0.09	0.29	0.06	0.13	0.14	0.17	0.17	0.1	0.2	0.21	0.22	0.13	0.13	0.21	0.19	0.19	0.19	0.19	0.19	0.19	0.15	0.09	0.12	0.21	0.19	0.19	0.2	0.19	0.21	0.2	0.19	0.19
1467981653	0.1	1	0.75	0.17	0.95	0.63	0.16	0.23	0.15	0.28	0.23	0.22	0.21	0.2	0.12	0.18	0.29	0.11	0.22	0.13	0.26	0.35	0.28	0.18	0.07	0.19	0.34	0.43	0.1	0.12	0.26	0.13	0.21	0.21	0.21	0.21	0.21	0.17	0.08	0.1	0.09	0.18	0.18	0.13	0.18	0.2	0.09	0.23	0.22
1467982207	0.1	1	0.75	0.17	0.95	0.63	0.16	0.23	0.15	0.28	0.23	0.22	0.21	0.2	0.12	0.18	0.29	0.11	0.22	0.13	0.26	0.35	0.28	0.18	0.07	0.19	0.34	0.43	0.1	0.12	0.26	0.13	0.21	0.21	0.21	0.21	0.21	0.17	0.08	0.1	0.09	0.18	0.18	0.13	0.18	0.2	0.09	0.23	0.22
1467982725	0.13	0.75	1	0.18	0.71	0.77	0.2	0.2	0.15	0.38	0.28	0.28	0.25	0.22	0.14	0.18	0.24	0.13	0.27	0.11	0.26	0.3	0.33	0.17	0.08	0.23	0.37	0.44	0.12	0.14	0.27	0.16	0.26	0.26	0.26	0.26	0.26	0.17	0.09	0.12	0.11	0.22	0.21	0.16	0.22	0.24	0.1	0.3	0.29
1467986937	0.15	0.4	0.49	0.19	0.38	0.46	0.17	0.25	0.16	0.48	0.4	0.25	0.36	0.27	0.17	0.22	0.27	0.15	0.36	0.09	0.31	0.29	0.33	0.16	0.1	0.24	0.41	0.61	0.11	0.13	0.33	0.19	0.31	0.31	0.31	0.31	0.31	0.17	0.09	0.12	0.11	0.26	0.24	0.18	0.26	0.34	0.11	0.39	0.38
1467987161	0.15	0.4	0.49	0.19	0.39	0.46	0.17	0.25	0.16	0.48	0.41	0.25	0.36	0.28	0.17	0.22	0.27	0.15	0.36	0.1	0.32	0.29	0.33	0.16	0.1	0.24	0.4	0.61	0.11	0.13	0.33	0.19	0.31	0.31	0.31	0.31	0.31	0.17	0.09	0.12	0.11	0.26	0.24	0.17	0.26	0.34	0.11	0.39	0.39
1467987234	0.13	0.75	1	0.18	0.71	0.77	0.2	0.2	0.15	0.38	0.28	0.28	0.25	0.22	0.14	0.18	0.24	0.13	0.27	0.11	0.26	0.3	0.33	0.17	0.08	0.23	0.37	0.44	0.12	0.14	0.27	0.16	0.26	0.26	0.26	0.26	0.26	0.17	0.09	0.12	0.11	0.22	0.21	0.16	0.22	0.24	0.1	0.3	0.29
1467987245	0.1	1	0.75	0.17	0.95	0.63	0.16	0.23	0.15	0.28	0.23	0.22	0.21	0.2	0.12	0.18	0.29	0.11	0.22	0.13	0.26	0.35	0.28	0.18	0.07	0.19	0.34	0.43	0.1	0.12	0.26	0.13	0.21	0.21	0.21	0.21	0.21	0.17	0.08	0.1	0.09	0.18	0.18	0.13	0.18	0.2	0.09	0.23	0.22
1467987256	0.13	0.75	1	0.18	0.71	0.77	0.2	0.2	0.15	0.38	0.28	0.28	0.25	0.22	0.14	0.18	0.24	0.13	0.27	0.11	0.26	0.3	0.33	0.17	0.08	0.23	0.37	0.44	0.12	0.14	0.27	0.16	0.26	0.26	0.26	0.26	0.26	0.17	0.09	0.12	0.11	0.22	0.21	0.16	0.22	0.24	0.1	0.3	0.29
1467987267	0.1	1	0.75	0.17	0.95	0.63	0.16	0.23	0.15	0.28	0.23	0.22	0.21	0.2	0.12	0.18	0.29	0.11	0.22	0.13	0.26	0.35	0.28	0.18	0.07	0.19	0.34	0.43	0.1	0.12	0.26	0.13	0.21	0.21	0.21	0.21	0.21	0.17	0.08	0.1	0.09	0.18	0.18	0.13	0.18	0.2	0.09	0.23	0.22
1467987278	0.13	0.75	1	0.18	0.71	0.77	0.2	0.2	0.15	0.38	0.28	0.28	0.25	0.22	0.14	0.18	0.24	0.13	0.27	0.11	0.26	0.3	0.33	0.17	0.08	0.23	0.37	0.44	0.12	0.14	0.27	0.16	0.26	0.26	0.26	0.26	0.26	0.17	0.09	0.12	0.11	0.22	0.21	0.16	0.22	0.24	0.1	0.3	0.29
1467987289	0.1	1	0.75	0.17	0.95	0.63	0.16	0.23	0.15	0.28	0.23	0.22	0.21	0.2	0.12	0.18	0.29	0.11	0.22	0.13	0.26	0.35	0.28	0.18	0.07	0.19	0.34	0.43	0.1	0.12	0.26	0.13	0.21	0.21	0.21	0.21	0.21	0.17	0.08	0.1	0.09	0.18	0.18	0.13	0.18	0.2	0.09	0.23	0.22
1467987300	0.13	0.75	1	0.18	0.71	0.77	0.2	0.2	0.15	0.38	0.28	0.28	0.25	0.22	0.14	0.18	0.24	0.13	0.27	0.11	0.26	0.3	0.33	0.17	0.08	0.23	0.37	0.44	0.12	0.14	0.27	0.16	0.26	0.26	0.26	0.26	0.26	0.17	0.09	0.12	0.11	0.22	0.21	0.16	0.22	0.24	0.1	0.3	0.29
1467987311	0.13	0.75	1	0.18	0.71	0.77	0.2	0.2	0.15	0.38	0.28	0.28	0.25	0.22	0.14	0.18	0.24	0.13	0.27	0.11	0.26	0.3	0.33	0.17	0.08	0.23	0.37	0.44	0.12	0.14	0.27	0.16	0.26	0.26	0.26	0.26	0.26	0.17	0.09	0.12	0.11	0.22	0.21	0.16	0.22	0.24	0.1	0.3	0.29
1467988388	0.15	0.4	0.49	0.19	0.38	0.46	0.17	0.25	0.16	0.48	0.4	0.25	0.36	0.27	0.17	0.22	0.27	0.15	0.36	0.09	0.31	0.29	0.33	0.16	0.1	0.24	0.41	0.61	0.11	0.13	0.33	0.19	0.31	0.31	0.31	0.31	0.31	0.17	0.09	0.12	0.11	0.26	0.24	0.18	0.26	0.34	0.11	0.39	0.38
1467996610	0.08	0.34	0.34	0.15	0.34	0.38	0.1	0.13	0.15	0.22	0.23	0.13	0.2	0.13	0.1	0.12	0.25	0.09	0.17	0.08	0.16	0.24	0.23	0.12	0.06	0.21	0.26	0.31	0.08	0.09	0.19	0.11	0.18	0.18	0.18	0.18	0.18	0.13	0.06	0.07	0.07	0.15	0.14	0.11	0.15	0.2	0.07	0.2	0.18
1468002286	0.15	0.4	0.49	0.19	0.39	0.46	0.17	0.25	0.16	0.48	0.41	0.25	0.36	0.28	0.17	0.22	0.27	0.15	0.36	0.1	0.32	0.29	0.33	0.16	0.1	0.24	0.4	0.61	0.11	0.13	0.33	0.19	0.31	0.31	0.31	0.31	0.31	0.17	0.09	0.12	0.11	0.26	0.24	0.17	0.26	0.34	0.11	0.39	0.39
1468003702	0.13	0.48	0.56	0.19	0.49	0.64	0.16	0.2	0.19	0.33	0.27	0.28	0.32	0.22	0.14	0.18	0.29	0.13	0.27	0.09	0.24	0.38	0.29	0.16	0.08	0.24	0.34	0.49	0.1	0.11	0.27	0.16	0.26	0.26	0.26	0.26	0.26	0.18	0.08	0.1	0.1	0.21	0.2	0.15	0.21	0.24	0.1	0.33	0.29
1468005026	0.28	0.21	0.25	0.2	0.2	0.24	0.14	0.16	0.17	0.22	0.28	0.25	0.21	0.19	0.17	0.19	0.18	0.16	0.24	0.11	0.18	0.15	0.46	0.16	0.08	0.15	0.26	0.29	0.09	0.1	0.23	0.15	0.2	0.2	0.2	0.2	0.2	0.2	0.07	0.09	0.1	0.16	0.16	0.13	0.16	0.2	0.09	0.25	0.26
1468010741	0.18	0.18	0.18	0.16	0.17	0.17	0.27	0.32	0.15	0.2	0.29	0.31	0.28	0.32	0.29	0.29	0.15	0.21	0.31	0.1	0.27	0.19	0.18	0.21	0.12	0.11	0.24	0.32	0.11	0.11	0.29	0.15	0.17	0.17	0.17	0.17	0.17	0.16	0.09	0.13	0.15	0.13	0.13	0.12	0.13	0.22	0.15	0.35	0.37
1468011560	0.16	0.08	0.1	0.06	0.08	0.09	0.14	0.17	0.05	0.18	0.12	0.18	0.19	0.22	0.16	0.15	0.05	0.55	0.21	0.04	0.17	0.08	0.1	0.06	0.13	0.1	0.1	0.13	0.09	0.09	0.12	0.13	0.11	0.11	0.11	0.11	0.11	0.06	0.08	0.11	0.08	0.11	0.11	0.11	0.11	0.12	0.08	0.2	0.21
1468011799	0.24	0.24	0.3	0.15	0.22	0.26	0.2	0.15	0.11	0.47	0.24	0.16	0.2	0.28	0.14	0.14	0.15	0.11	0.4	0.08	0.17	0.15	0.24	0.1	0.12	0.27	0.28	0.34	0.22	0.17	0.28	0.24	0.26	0.26	0.26	0.26	0.26	0.12	0.14	0.16	0.13	0.26	0.28	0.23	0.26	0.26	0.12	0.25	0.26
1468011944	0.24	0.26	0.34	0.15	0.25	0.3	0.2	0.15	0.11	0.5	0.24	0.16	0.2	0.27	0.14	0.14	0.16	0.11	0.39	0.08	0.16	0.15	0.23	0.1	0.12	0.29	0.29	0.37	0.22	0.17	0.27	0.23	0.29	0.29	0.29	0.29	0.29	0.12	0.14	0.16	0.13	0.29	0.32	0.23	0.29	0.26	0.12	0.24	0.25
1468013051	0.07	0.29	0.27	0.14	0.31	0.29	0.08	0.1	0.15	0.18	0.14	0.09	0.16	0.1	0.08	0.09	0.23	0.07	0.13	0.08	0.13	0.19	0.17	0.1	0.05	0.16	0.24	0.26	0.06	0.08	0.16	0.09	0.14	0.14	0.14	0.14	0.14	0.13	0.05	0.06	0.06	0.12	0.12	0.09	0.12	0.12	0.06	0.13	0.12
1468013060	0.05	0.26	0.21	0.12	0.28	0.24	0.06	0.09	0.12	0.12	0.13	0.07	0.12	0.09	0.06	0.09	0.21	0.06	0.1	0.07	0.11	0.19	0.13	0.1	0.04	0.13	0.18	0.2	0.05	0.06	0.13	0.07	0.11	0.11	0.11	0.11	0.11	0.12	0.04	0.05	0.05	0.09	0.09	0.07	0.09	0.12	0.05	0.11	0.09
1468013381	0.1	0.32	0.24	0.19	0.33	0.24	0.15	0.24	0.2	0.13	0.3	0.24	0.26	0.2	0.2	0.25	0.32	0.16	0.17	0.14	0.31	0.47	0.19	0.24	0.07	0.09	0.33	0.28	0.1	0.09	0.22	0.1	0.12	0.12	0.12	0.12	0.12	0.2	0.07	0.09	0.08	0.09	0.1	0.1	0.09	0.21	0.09	0.26	0.23
1468013796	0.06	0.3	0.24	0.14	0.33	0.26	0.08	0.12	0.14	0.14	0.15	0.09	0.15	0.11	0.08	0.11	0.26	0.07	0.12	0.09	0.2	0.27	0.17	0.13	0.04	0.12	0.27	0.25	0.06	0.07	0.15	0.08	0.14	0.14	0.14	0.14	0.14	0.14	0.05	0.06	0.06	0.11	0.11	0.09	0.11	0.13	0.06	0.14	0.12
1468014280	0.08	0.39	0.31	0.16	0.41	0.32	0.1	0.15	0.17	0.19	0.17	0.12	0.2	0.15	0.09	0.14	0.35	0.08	0.16	0.1	0.25	0.29	0.2	0.15	0.05	0.15	0.31	0.33	0.07	0.08	0.19	0.1	0.16	0.16	0.16	0.16	0.16	0.16	0.06	0.07	0.07	0.14	0.14	0.1	0.14	0.15	0.07	0.18	0.16
1468014365	0.32	0.3	0.35	0.23	0.3	0.38	0.14	0.19	0.21	0.24	0.26	0.19	0.28	0.2	0.14	0.17	0.21	0.12	0.26	0.11	0.23	0.26	0.55	0.14	0.08	0.18	0.29	0.37	0.1	0.11	0.26	0.16	0.22	0.22	0.22	0.22	0.22	0.23	0.08	0.1	0.1	0.17	0.18	0.15	0.17	0.23	0.09	0.31	0.27
1468014507	0.32	0.3	0.35	0.23	0.3	0.38	0.14	0.19	0.21	0.24	0.26	0.19	0.28	0.2	0.14	0.17	0.21	0.12	0.26	0.11	0.23	0.26	0.55	0.14	0.08	0.18	0.29	0.37	0.1	0.11	0.26	0.16	0.22	0.22	0.22	0.22	0.22	0.23	0.08	0.1	0.1	0.17	0.18	0.15	0.17	0.23	0.09	0.31	0.27
1468016043	0.04	0.21	0.2	0.1	0.21	0.22	0.06	0.06	0.1	0.11	0.11	0.06	0.09	0.06	0.05	0.06	0.16	0.05	0.08	0.06	0.08	0.16	0.12	0.07	0.03	0.12	0.15	0.15	0.06	0.06	0.1	0.06	0.09	0.09	0.09	0.09	0.09	0.09	0.04	0.05	0.05	0.08	0.08	0.07	0.08	0.11	0.04	0.09	0.08
1468016072	0.05	0.2	0.2	0.11	0.21	0.24	0.06	0.07	0.11	0.12	0.13	0.07	0.1	0.07	0.05	0.07	0.17	0.05	0.08	0.06	0.09	0.17	0.13	0.08	0.03	0.13	0.16	0.16	0.05	0.06	0.11	0.06	0.1	0.1	0.1	0.1	0.1	0.1	0.04	0.04	0.05	0.09	0.09	0.07	0.09	0.12	0.05	0.1	0.09
1468016237	0.04	0.21	0.21	0.1	0.21	0.24	0.05	0.06	0.1	0.11	0.11	0.06	0.09	0.06	0.05	0.06	0.15	0.05	0.08	0.05	0.08	0.17	0.12	0.07	0.03	0.12	0.15	0.15	0.05	0.05	0.1	0.06	0.09	0.09	0.09	0.09	0.09	0.09	0.04	0.04	0.05	0.08	0.08	0.07	0.08	0.11	0.04	0.09	0.08
1468016247	0.04	0.21	0.21	0.09	0.21	0.22	0.06	0.06	0.1	0.1	0.11	0.06	0.09	0.06	0.05	0.06	0.15	0.05	0.07	0.06	0.07	0.16	0.11	0.07	0.03	0.11	0.14	0.14	0.05	0.06	0.09	0.06	0.09	0.09	0.09	0.09	0.09	0.09	0.04	0.04	0.04	0.07	0.07	0.06	0.07	0.11	0.04	0.09	0.08
1468016256	0.05	0.19	0.19	0.16	0.19	0.22	0.08	0.07	0.17	0.11	0.14	0.07	0.1	0.07	0.05	0.07	0.21	0.05	0.08	0.06	0.08	0.16	0.12	0.11	0.03	0.12	0.14	0.16	0.05	0.05	0.11	0.06	0.1	0.1	0.1	0.1	0.1	0.15	0.04	0.04	0.07	0.08	0.08	0.07	0.08	0.12	0.08	0.1	0.09
1468017097	0.12	0.21	0.25	0.1	0.2	0.26	0.12	0.1	0.08	0.33	0.16	0.1	0.12	0.15	0.09	0.09	0.13	0.08	0.22	0.05	0.1	0.1	0.17	0.08	0.08	0.78	0.22	0.26	0.1	0.11	0.18	0.16	0.21	0.21	0.21	0.21	0.21	0.08	0.08	0.1	0.1	0.21	0.21	0.17	0.21	0.15	0.09	0.15	0.15
1468017321	0.27	0.17	0.21	0.13	0.16	0.18	0.22	0.17	0.12	0.33	0.22	0.18	0.22	0.32	0.16	0.15	0.1	0.12	0.38	0.09	0.18	0.15	0.18	0.11	0.13	0.18	0.19	0.24	0.23	0.17	0.23	0.22	0.19	0.19	0.19	0.19	0.19	0.12	0.15	0.18	0.13	0.19	0.19	0.19	0.19	0.28	0.13	0.28	0.29
1468017358	0.26	0.19	0.24	0.15	0.18	0.21	0.21	0.16	0.11	0.39	0.25	0.17	0.21	0.3	0.15	0.15	0.12	0.11	0.43	0.08	0.17	0.15	0.21	0.11	0.13	0.21	0.23	0.28	0.22	0.17	0.27	0.25	0.23	0.23	0.23	0.23	0.23	0.12	0.15	0.17	0.13	0.23	0.22	0.22	0.23	0.27	0.12	0.26	0.27
1468017396	0.25	0.22	0.28	0.15	0.21	0.25	0.21	0.16	0.12	0.46	0.24	0.17	0.21	0.29	0.14	0.14	0.14	0.11	0.41	0.08	0.17	0.15	0.24	0.11	0.12	0.25	0.26	0.33	0.22	0.17	0.27	0.24	0.26	0.26	0.26	0.26	0.26	0.12	0.14	0.17	0.13	0.26	0.26	0.22	0.26	0.26	0.12	0.25	0.26
1468017434	0.25	0.25	0.32	0.15	0.24	0.28	0.21	0.16	0.11	0.51	0.24	0.16	0.2	0.28	0.14	0.14	0.15	0.11	0.41	0.08	0.17	0.15	0.24	0.11	0.12	0.29	0.29	0.37	0.22	0.17	0.27	0.24	0.29	0.29	0.29	0.29	0.29	0.12	0.14	0.17	0.13	0.29	0.29	0.22	0.29	0.26	0.12	0.25	0.26
1468017471	0.25	0.27	0.34	0.15	0.25	0.3	0.21	0.16	0.11	0.57	0.24	0.16	0.2	0.28	0.14	0.14	0.16	0.11	0.41	0.08	0.17	0.15	0.24	0.11	0.12	0.29	0.29	0.4	0.22	0.17	0.27	0.24	0.31	0.31	0.31	0.31	0.31	0.12	0.14	0.17	0.13	0.31	0.29	0.22	0.31	0.26	0.12	0.25	0.26
1468017509	0.25	0.27	0.35	0.15	0.26	0.31	0.21	0.16	0.11	0.58	0.24	0.16	0.2	0.28	0.14	0.14	0.16	0.11	0.41	0.08	0.17	0.15	0.24	0.11	0.12	0.29	0.29	0.41	0.22	0.17	0.27	0.24	0.32	0.32	0.32	0.32	0.32	0.12	0.14	0.17	0.13	0.32	0.29	0.22	0.32	0.26	0.12	0.25	0.26
1468021250	0.16	0.26	0.33	0.11	0.25	0.34	0.14	0.12	0.09	0.49	0.2	0.13	0.16	0.2	0.12	0.11	0.14	0.09	0.3	0.05	0.13	0.11	0.2	0.09	0.1	0.33	0.24	0.33	0.11	0.13	0.22	0.2	0.26	0.26	0.26	0.26	0.26	0.09	0.09	0.12	0.11	0.26	0.25	0.18	0.26	0.18	0.11	0.19	0.2
1468023736	0.27	0.14	0.17	0.11	0.13	0.14	0.22	0.17	0.09	0.27	0.18	0.18	0.21	0.32	0.16	0.15	0.08	0.12	0.31	0.09	0.18	0.15	0.15	0.09	0.13	0.15	0.16	0.2	0.23	0.15	0.2	0.18	0.16	0.16	0.16	0.16	0.16	0.1	0.15	0.18	0.11	0.16	0.16	0.16	0.16	0.22	0.11	0.28	0.29
1468027462	0.17	0.2	0.25	0.15	0.19	0.24	0.16	0.13	0.12	0.43	0.24	0.15	0.17	0.22	0.12	0.12	0.3	0.1	0.32	0.05	0.14	0.12	0.2	0.14	0.11	0.24	0.25	0.32	0.11	0.12	0.21	0.21	0.28	0.28	0.28	0.28	0.28	0.12	0.09	0.12	0.17	0.28	0.25	0.18	0.28	0.17	0.17	0.2	0.21
1468027477	0.1	0.29	0.29	0.27	0.29	0.29	0.14	0.15	0.25	0.23	0.29	0.19	0.22	0.15	0.17	0.18	0.59	0.12	0.21	0.11	0.19	0.24	0.21	0.24	0.07	0.17	0.41	0.4	0.08	0.09	0.21	0.13	0.19	0.19	0.19	0.19	0.19	0.24	0.07	0.08	0.13	0.17	0.16	0.12	0.17	0.16	0.13	0.19	0.18
1468027492	0.09	0.26	0.27	0.25	0.25	0.27	0.17	0.15	0.22	0.21	0.37	0.25	0.19	0.15	0.19	0.2	0.35	0.14	0.21	0.12	0.19	0.22	0.19	0.3	0.07	0.15	0.4	0.31	0.08	0.09	0.22	0.13	0.18	0.18	0.18	0.18	0.18	0.22	0.07	0.08	0.17	0.16	0.16	0.13	0.16	0.16	0.18	0.19	0.18
1468027501	0.1	0.28	0.29	0.27	0.28	0.28	0.14	0.14	0.25	0.22	0.29	0.19	0.22	0.15	0.17	0.18	0.65	0.12	0.2	0.12	0.19	0.22	0.21	0.23	0.07	0.17	0.41	0.39	0.08	0.09	0.24	0.12	0.19	0.19	0.19	0.19	0.19	0.24	0.07	0.08	0.13	0.17	0.17	0.14	0.17	0.16	0.13	0.19	0.18
1468027510	0.1	0.26	0.28	0.25	0.26	0.27	0.17	0.15	0.22	0.21	0.38	0.26	0.2	0.16	0.2	0.21	0.35	0.14	0.21	0.12	0.19	0.22	0.2	0.3	0.07	0.15	0.4	0.31	0.08	0.09	0.22	0.13	0.18	0.18	0.18	0.18	0.18	0.22	0.07	0.08	0.18	0.16	0.16	0.14	0.16	0.17	0.18	0.19	0.19
1468031925	0.1	0.95	0.71	0.18	1	0.64	0.16	0.22	0.17	0.27	0.22	0.21	0.21	0.19	0.12	0.18	0.31	0.1	0.21	0.13	0.26	0.36	0.27	0.18	0.07	0.19	0.34	0.42	0.09	0.12	0.26	0.13	0.21	0.21	0.21	0.21	0.21	0.18	0.08	0.1	0.09	0.17	0.17	0.13	0.17	0.19	0.08	0.23	0.21
1468034477	0.25	0.12	0.15	0.14	0.11	0.14	0.15	0.13	0.12	0.24	0.17	0.14	0.16	0.22	0.12	0.12	0.08	0.1	0.26	0.07	0.14	0.12	0.18	0.09	0.1	0.14	0.15	0.18	0.16	0.13	0.18	0.17	0.16	0.16	0.16	0.16	0.16	0.13	0.11	0.13	0.12	0.16	0.16	0.16	0.16	0.21	0.11	0.2	0.21
1468041696	0.13	0.27	0.28	0.18	0.28	0.33	0.12	0.16	0.2	0.16	0.21	0.16	0.25	0.16	0.11	0.14	0.24	0.11	0.18	0.1	0.23	0.31	0.24	0.14	0.07	0.13	0.25	0.29	0.1	0.1	0.2	0.12	0.15	0.15	0.15	0.15	0.15	0.19	0.07	0.09	0.09	0.12	0.12	0.11	0.12	0.23	0.09	0.25	0.22
1468041705	0.13	0.26	0.27	0.19	0.26	0.29	0.13	0.16	0.2	0.16	0.22	0.16	0.25	0.16	0.11	0.14	0.23	0.11	0.18	0.1	0.23	0.31	0.24	0.14	0.07	0.13	0.24	0.29	0.1	0.1	0.2	0.12	0.15	0.15	0.15	0.15	0.15	0.2	0.07	0.09	0.09	0.12	0.12	0.11	0.12	0.23	0.09	0.25	0.22
1468042262	0.1	0.42	0.37	0.21	0.45	0.4	0.13	0.19	0.22	0.25	0.31	0.2	0.25	0.18	0.17	0.22	0.43	0.14	0.21	0.12	0.27	0.33	0.27	0.23	0.07	0.17	0.47	0.4	0.08	0.11	0.24	0.13	0.21	0.21	0.21	0.21	0.21	0.21	0.07	0.08	0.09	0.17	0.16	0.12	0.17	0.19	0.09	0.23	0.21
1468042270	0.08	0.38	0.32	0.18	0.4	0.32	0.12	0.15	0.19	0.2	0.25	0.16	0.19	0.15	0.14	0.17	0.37	0.11	0.16	0.12	0.21	0.29	0.22	0.2	0.05	0.14	0.39	0.31	0.08	0.1	0.19	0.1	0.17	0.17	0.17	0.17	0.17	0.19	0.07	0.08	0.08	0.14	0.13	0.11	0.14	0.16	0.08	0.18	0.16
1468044620	0.32	0.15	0.18	0.15	0.14	0.16	0.18	0.13	0.13	0.25	0.18	0.14	0.17	0.23	0.12	0.12	0.09	0.1	0.27	0.1	0.14	0.13	0.24	0.1	0.11	0.15	0.17	0.2	0.2	0.15	0.19	0.18	0.16	0.16	0.16	0.16	0.16	0.15	0.13	0.15	0.12	0.16	0.16	0.16	0.16	0.23	0.11	0.21	0.21
1468046926	0.2	0.17	0.21	0.19	0.17	0.19	0.22	0.13	0.15	0.29	0.3	0.15	0.16	0.22	0.12	0.12	0.16	0.1	0.31	0.08	0.14	0.15	0.18	0.18	0.1	0.19	0.2	0.23	0.19	0.15	0.22	0.2	0.19	0.19	0.19	0.19	0.19	0.15	0.13	0.14	0.22	0.19	0.19	0.19	0.19	0.22	0.21	0.2	0.2
1468047689	0.12	0.63	0.77	0.18	0.64	1	0.14	0.19	0.16	0.35	0.27	0.26	0.26	0.2	0.14	0.17	0.25	0.12	0.26	0.09	0.23	0.29	0.31	0.16	0.08	0.24	0.34	0.42	0.1	0.12	0.26	0.16	0.25	0.25	0.25	0.25	0.25	0.16	0.08	0.1	0.1	0.21	0.2	0.15	0.21	0.23	0.1	0.31	0.27
1468047932	0.27	0.22	0.3	0.13	0.21	0.28	0.22	0.21	0.1	0.75	0.29	0.23	0.29	0.41	0.19	0.18	0.14	0.14	0.67	0.06	0.22	0.13	0.27	0.11	0.16	0.29	0.31	0.46	0.14	0.16	0.31	0.31	0.37	0.37	0.37	0.37	0.37	0.11	0.11	0.17	0.15	0.37	0.36	0.25	0.37	0.25	0.14	0.36	0.4
1468048192	0.32	0.13	0.17	0.11	0.12	0.16	0.25	0.25	0.1	0.4	0.22	0.26	0.32	0.53	0.22	0.21	0.08	0.15	0.53	0.06	0.26	0.17	0.17	0.1	0.18	0.17	0.18	0.26	0.19	0.14	0.24	0.24	0.2	0.2	0.2	0.2	0.2	0.11	0.12	0.19	0.13	0.2	0.2	0.19	0.2	0.27	0.13	0.45	0.5
1468048344	0.2	0.15	0.19	0.12	0.15	0.19	0.17	0.15	0.11	0.35	0.21	0.16	0.2	0.27	0.14	0.14	0.09	0.18	0.33	0.06	0.16	0.15	0.19	0.1	0.12	0.17	0.2	0.23	0.15	0.16	0.22	0.2	0.18	0.18	0.18	0.18	0.18	0.12	0.1	0.14	0.13	0.18	0.18	0.18	0.18	0.26	0.12	0.25	0.26
1468048353	0.16	0.14	0.17	0.11	0.13	0.17	0.15	0.13	0.1	0.28	0.18	0.13	0.16	0.21	0.12	0.12	0.09	0.16	0.26	0.06	0.14	0.13	0.17	0.09	0.1	0.15	0.17	0.19	0.14	0.15	0.18	0.17	0.16	0.16	0.16	0.16	0.16	0.11	0.09	0.12	0.11	0.16	0.16	0.15	0.16	0.22	0.11	0.2	0.2
1468048379	0.23	0.28	0.38	0.13	0.27	0.35	0.2	0.18	0.1	1	0.28	0.2	0.25	0.33	0.17	0.16	0.15	0.12	0.53	0.06	0.19	0.13	0.29	0.11	0.14	0.29	0.33	0.47	0.14	0.18	0.29	0.28	0.36	0.36	0.36	0.36	0.36	0.1	0.11	0.15	0.14	0.36	0.32	0.23	0.36	0.24	0.13	0.3	0.32
1468048386	0.23	0.28	0.38	0.13	0.27	0.35	0.2	0.18	0.1	1	0.28	0.2	0.25	0.33	0.17	0.16	0.15	0.12	0.53	0.06	0.19	0.13	0.29	0.11	0.14	0.29	0.33	0.47	0.14	0.18	0.29	0.28	0.36	0.36	0.36	0.36	0.36	0.1	0.11	0.15	0.14	0.36	0.32	0.23	0.36	0.24	0.13	0.3	0.32
1468048393	0.23	0.28	0.38	0.13	0.27	0.35	0.2	0.18	0.1	1	0.28	0.2	0.25	0.33	0.17	0.16	0.15	0.12	0.53	0.06	0.19	0.13	0.29	0.11	0.14	0.29	0.33	0.47	0.14	0.18	0.29	0.28	0.36	0.36	0.36	0.36	0.36	0.1	0.11	0.15	0.14	0.36	0.32	0.23	0.36	0.24	0.13	0.3	0.32
1468048400	0.23	0.28	0.38	0.13	0.27	0.35	0.2	0.18	0.1	1	0.28	0.2	0.25	0.33	0.17	0.16	0.15	0.12	0.53	0.06	0.19	0.13	0.29	0.11	0.14	0.29	0.33	0.47	0.14	0.18	0.29	0.28	0.36	0.36	0.36	0.36	0.36	0.1	0.11	0.15	0.14	0.36	0.32	0.23	0.36	0.24	0.13	0.3	0.32
1468050454	0.23	0.28	0.38	0.13	0.27	0.35	0.2	0.18	0.1	1	0.28	0.2	0.25	0.33	0.17	0.16	0.15	0.12	0.53	0.06	0.19	0.13	0.29	0.11	0.14	0.29	0.33	0.47	0.14	0.18	0.29	0.28	0.36	0.36	0.36	0.36	0.36	0.1	0.11	0.15	0.14	0.36	0.32	0.23	0.36	0.24	0.13	0.3	0.32
1468053078	0.15	0.4	0.49	0.19	0.38	0.46	0.17	0.25	0.16	0.48	0.4	0.25	0.36	0.27	0.17	0.22	0.27	0.15	0.36	0.09	0.31	0.29	0.33	0.16	0.1	0.24	0.41	0.61	0.11	0.13	0.33	0.19	0.31	0.31	0.31	0.31	0.31	0.17	0.09	0.12	0.11	0.26	0.24	0.18	0.26	0.34	0.11	0.39	0.38
1468155175	0.23	0.19	0.24	0.15	0.18	0.23	0.23	0.18	0.11	0.53	0.45	0.2	0.25	0.33	0.17	0.16	0.13	0.12	0.53	0.06	0.19	0.14	0.25	0.13	0.14	0.22	0.26	0.31	0.14	0.18	0.28	0.28	0.25	0.25	0.25	0.25	0.25	0.12	0.11	0.15	0.16	0.25	0.24	0.23	0.25	0.24	0.16	0.3	0.32
1468266050	0.25	0.24	0.32	0.13	0.23	0.3	0.21	0.2	0.09	0.7	0.28	0.22	0.27	0.38	0.18	0.17	0.14	0.13	0.61	0.06	0.21	0.13	0.26	0.11	0.15	0.3	0.31	0.45	0.14	0.16	0.32	0.3	0.35	0.35	0.35	0.35	0.35	0.1	0.11	0.16	0.15	0.35	0.4	0.26	0.35	0.24	0.14	0.33	0.36
1468267888	0.13	0.33	0.37	0.17	0.32	0.32	0.25	0.13	0.15	0.25	0.21	0.15	0.18	0.18	0.12	0.13	0.21	0.1	0.23	0.12	0.17	0.2	0.21	0.14	0.07	0.21	0.28	0.31	0.15	0.12	0.21	0.14	0.22	0.22	0.22	0.22	0.22	0.15	0.1	0.11	0.09	0.18	0.18	0.14	0.18	0.21	0.09	0.2	0.19
1468280134	0.16	0.32	0.4	0.17	0.31	0.37	0.19	0.22	0.14	0.42	0.3	0.26	0.34	0.3	0.18	0.2	0.2	0.15	0.37	0.11	0.28	0.23	0.29	0.14	0.1	0.22	0.34	0.52	0.12	0.13	0.32	0.2	0.32	0.32	0.32	0.32	0.32	0.16	0.09	0.13	0.11	0.26	0.24	0.18	0.26	0.28	0.11	0.39	0.4
1468359590	0.26	0.24	0.32	0.13	0.23	0.3	0.22	0.2	0.09	0.82	0.28	0.22	0.28	0.39	0.18	0.18	0.15	0.13	0.63	0.06	0.21	0.13	0.26	0.11	0.15	0.29	0.3	0.5	0.14	0.16	0.31	0.3	0.4	0.4	0.4	0.4	0.4	0.1	0.11	0.16	0.15	0.4	0.35	0.25	0.4	0.24	0.14	0.34	0.37
1468393430	0.27	0.19	0.25	0.13	0.18	0.23	0.23	0.2	0.1	0.54	0.29	0.22	0.28	0.42	0.19	0.18	0.13	0.14	0.65	0.06	0.22	0.14	0.23	0.11	0.15	0.26	0.27	0.35	0.16	0.17	0.39	0.31	0.28	0.28	0.28	0.28	0.28	0.11	0.12	0.17	0.15	0.28	0.28	0.34	0.28	0.25	0.14	0.35	0.38
1468451088	0.22	0.24	0.31	0.18	0.23	0.29	0.22	0.32	0.15	0.36	0.44	0.33	0.39	0.45	0.24	0.28	0.15	0.2	0.5	0.09	0.34	0.26	0.29	0.17	0.13	0.18	0.29	0.4	0.17	0.16	0.35	0.22	0.25	0.25	0.25	0.25	0.25	0.18	0.11	0.15	0.14	0.2	0.2	0.19	0.2	0.59	0.13	0.51	0.55
1468453601	0.26	0.22	0.23	0.24	0.21	0.21	0.18	0.39	0.22	0.2	0.23	0.27	0.4	0.31	0.21	0.22	0.16	0.16	0.31	0.12	0.33	0.26	0.3	0.14	0.11	0.11	0.25	0.43	0.11	0.11	0.32	0.15	0.17	0.17	0.17	0.17	0.17	0.24	0.09	0.13	0.1	0.13	0.13	0.12	0.13	0.23	0.1	0.39	0.41
1468591591	0.16	0.32	0.4	0.17	0.3	0.36	0.19	0.22	0.14	0.4	0.3	0.26	0.34	0.3	0.18	0.2	0.2	0.15	0.37	0.11	0.28	0.23	0.29	0.14	0.1	0.22	0.35	0.51	0.12	0.13	0.32	0.2	0.32	0.32	0.32	0.32	0.32	0.16	0.09	0.13	0.11	0.26	0.24	0.18	0.26	0.28	0.11	0.39	0.4
1468591642	0.16	0.32	0.4	0.17	0.31	0.37	0.19	0.22	0.14	0.42	0.3	0.26	0.34	0.3	0.18	0.2	0.2	0.15	0.37	0.11	0.28	0.23	0.29	0.14	0.1	0.22	0.34	0.52	0.12	0.13	0.32	0.2	0.32	0.32	0.32	0.32	0.32	0.16	0.09	0.13	0.11	0.26	0.24	0.18	0.26	0.28	0.11	0.39	0.4
1468591698	0.16	0.32	0.4	0.17	0.31	0.37	0.19	0.22	0.14	0.42	0.3	0.26	0.34	0.3	0.18	0.2	0.2	0.15	0.37	0.11	0.28	0.23	0.29	0.14	0.1	0.22	0.34	0.52	0.12	0.13	0.32	0.2	0.32	0.32	0.32	0.32	0.32	0.16	0.09	0.13	0.11	0.26	0.24	0.18	0.26	0.28	0.11	0.39	0.4
1469265426	0.15	0.24	0.29	0.2	0.23	0.27	0.22	0.25	0.17	0.28	0.86	0.36	0.25	0.27	0.27	0.32	0.23	0.24	0.35	0.12	0.26	0.2	0.28	0.24	0.1	0.17	0.38	0.33	0.11	0.13	0.29	0.19	0.22	0.22	0.22	0.22	0.22	0.18	0.09	0.12	0.14	0.18	0.18	0.17	0.18	0.33	0.14	0.32	0.33
1469299230	0.11	0.57	0.63	0.18	0.58	0.76	0.13	0.19	0.17	0.32	0.26	0.18	0.25	0.19	0.13	0.17	0.27	0.12	0.23	0.09	0.23	0.35	0.29	0.15	0.08	0.23	0.36	0.41	0.09	0.12	0.25	0.14	0.23	0.23	0.23	0.23	0.23	0.17	0.07	0.09	0.09	0.19	0.19	0.14	0.19	0.22	0.09	0.28	0.25
1469299791	0.11	0.61	0.7	0.17	0.62	0.89	0.13	0.19	0.16	0.32	0.26	0.24	0.24	0.19	0.13	0.17	0.24	0.11	0.24	0.09	0.22	0.32	0.29	0.15	0.08	0.23	0.34	0.39	0.09	0.12	0.25	0.15	0.24	0.24	0.24	0.24	0.24	0.16	0.07	0.09	0.1	0.19	0.19	0.14	0.19	0.22	0.09	0.29	0.25
1469299837	0.1	0.95	0.71	0.18	1	0.64	0.16	0.22	0.17	0.27	0.22	0.21	0.21	0.19	0.12	0.18	0.31	0.1	0.21	0.13	0.26	0.36	0.27	0.18	0.07	0.19	0.34	0.42	0.09	0.12	0.26	0.13	0.21	0.21	0.21	0.21	0.21	0.18	0.08	0.1	0.09	0.17	0.17	0.13	0.17	0.19	0.08	0.23	0.21
1469300118	0.13	0.75	1	0.18	0.71	0.77	0.2	0.2	0.15	0.38	0.28	0.28	0.25	0.22	0.14	0.18	0.24	0.13	0.27	0.11	0.26	0.3	0.33	0.17	0.08	0.23	0.37	0.44	0.12	0.14	0.27	0.16	0.26	0.26	0.26	0.26	0.26	0.17	0.09	0.12	0.11	0.22	0.21	0.16	0.22	0.24	0.1	0.3	0.29
1469351631	0.15	0.4	0.49	0.19	0.38	0.46	0.17	0.25	0.16	0.48	0.4	0.25	0.36	0.27	0.17	0.22	0.27	0.15	0.36	0.09	0.31	0.29	0.33	0.16	0.1	0.24	0.41	0.61	0.11	0.13	0.33	0.19	0.31	0.31	0.31	0.31	0.31	0.17	0.09	0.12	0.11	0.26	0.24	0.18	0.26	0.34	0.11	0.39	0.38
[truncated: 205 more columns]

## Sheet: S4.2
Molecule name	Molecule NICEdrug ID	Molecule ChEMBL ID	Molecule DrugBank ID	Molecule KEGG ID	Molecule SMILES	Most similar statin	NS*
E-64	33476		DB04276, EXPT01317	C01341	CC(CC(C(=O)NCCCC[NH+]=C(N)N)NC(=O)C(CC(=O)O)O)C	Pravastatin	0.23
Nanaomycin D	3904013	ChEMBL MALARIA,	DB01668, EXPT02375	D04648	O=C1CC2C(O1)C1=C(C(O2)C)C(=O)c2c(C1=O)cccc2O	Pravastatin	0.27
2-Tridecanoyloxy-Pentadecanoic A	5459982	CHEMBL 1988648	DB01814, EXPT02033		CCCCCCCCCCCCC(CC(=O)O)OC(=O)CCCCCCCCCCCC	Pravastatin	0.6
OBP-801	96065750	CHEMBL 3126832	DB12279		O=C1OC2C=CCCSSCC(C(=O)NC(C(C1)O)C(C)C)NC(=O)C(NC(=O)C2)C	Pravastatin	0.36
Carnitine	1467871455	CHEMBL 1149, CHEMBL 1229656, CHEMBL 1620698, CHEMBL 172513, CHEMBL 503189	DB02648, EXPT00038	C00318,C00487,C15025	OC(C[N+](C)(C)C)CC(=O)O	Pravastatin	0.31
O-Acetylcarnitine	1467889778	CHEMBL 1358846, CHEMBL 1625375, CHEMBL 1697733	DB08842	C02571	OC(=O)CC(C[N+](C)(C)C)OC(=O)C	Pravastatin	0.47
Josamycin	1467981653	ChEMBL_NTD, CHEMBL 1326015, CHEMBL 1671903, CHEMBL 1995525, CHEMBL 224436, CHEMBL 2361089, CHEMBL 329011	DB01321	C12662,D01235	O=CCC1CC(C)C(O)C=CC=CCC(OC(=O)CC(C(C1OC1OC(C)C(C(C1O)N(C)C)OC1OC(C)C(C(C1)(C)O)OC(=O)CC(C)C)OC)OC(=O)C)C	Lovastatin acid	0.41
Plitidepsin	1468014507	CHEMBL 1773899, CHEMBL 451930	DB04977	C16862,D11032	CCC(C1NC(=O)C(NC(=O)C(N(C(=O)C2CCCN2C(=O)C(=O)C)C)CC(C)C)C(C)OC(=O)C(Cc2ccc(cc2)OC)N(C)C(=O)C2CCCN2C(=O)C(NC(=O)C(C(=O)C(OC(=O)CC1O)C(C)C)C)CC(C)C)C	Lovastatin acid	0.39
Note: *NS: NICEdrug score between the candidate drug (column 1) and the most similar statin (column 7). This score considers the reactive site and its neighbourhood including up to seven atoms away (STAR Methods).
