# Supplementary material for: NICEdrug.ch, a workflow for rational drug design and systems-level analysis of drug metabolism
Source: eLife. 2021 Aug 3;10:e65543. doi: 10.7554/eLife.65543 (PMC8331181; doi:10.7554/eLife.65543)
Supplement: Supplementary file 5. — (A) List of essential genes and associated reactions in liver-stage Plasmodium, as obtained from the study (Stanway et al., 2019). (B) List of essential genes and associated reactions in a human cell, as obtained from the study (Wang et al., 2015). (C) List of metabolites linked to essential genes in liver-stage Plasmodium. (D) List of metabolites linked to essential genes in a human cell. [file elife-65543-supp5.xlsx]

## Sheet: summary
Tab in Supplementary_File_5	Description of each tab/section in Supplementary_File_5, related to Figure 6
S5.1	List of essential genes and associated reactions in liver-stage Plasmodium, as obtained from the study Stanway et al
S5.2	List of essential genes and associated reactions in a human cell, as obtained from the study Wang et al
S5.3	List of metabolites linked to essential genes in liver-stage Plasmodium
S5.4	List of metabolites linked to essential genes in a human cell

## Sheet: S5.1
Essential gene in Plasmodium berghei and its metabolic model iPbe	Reactions (KEGG ID) associated to essential genes, as defined in metabolic model of Plasmodium berghei iPbe	Reaction description (metabolite name)	Reaction E.C.	Metabolic subsystem
PBANKA_0102500	R03660_c	ATP + L-Phenylalanine + H+ + tRNA(Phe) <=> Diphosphate + AMP + L-Phenylalanyl-tRNA(Phe)	6.1.1.20	Aminoacyl-tRNA biosynthesis
PBANKA_0105900	R03197_a|R04972_a	4 H+ + Uroporphyrinogen I <=> 4 CO2 + Coproporphyrinogen I|4 H+ + Uroporphyrinogen III <=> 4 CO2 + Coproporphyrinogen III	4.1.1.37	Heme biosynthesis
PBANKA_0106100	R05611_m|R05615_m|R05616_m|R05617_m|R07273_m|R07456_m	4-Hydroxybenzoate + all-trans-Hexaprenyl diphosphate <=> Diphosphate + 3-Hexaprenyl-4-hydroxybenzoate|4-Hydroxybenzoate + all-trans-Nonaprenyl diphosphate <=> Diphosphate + 3-Nonaprenyl-4-hydroxybenzoate|4-Hydroxybenzoate + all-trans-Octaprenyl diphosphate <=> Diphosphate + 3-Octaprenyl-4-hydroxybenzoate|Diphosphate + all-trans-Octaprenyl diphosphate <=> Isopentenyl diphosphate + all-trans-Heptap…	2.5.1.-|2.5.1.39|2.5.1.74|4.3.3.6	Pyridoxal5P (vit B6) metabolism|Ubiquinone and other terpenoid-quinone biosynthesis
PBANKA_0108000	R02030_c|R07390_c	2 Phosphatidylglycerol <=> Glycerol + Cardiolipin|CDP-diacylglycerol + Phosphatidylglycerol <=> CMP + Cardiolipin	2.7.8.-	Glycerophospholipid metabolism
PBANKA_0109100	R01067_c|R01067_n|R01440_c|R01641_c|R01641_n|R06590_c|R06590_n	D-Fructose 6-phosphate + D-Glyceraldehyde 3-phosphate <=> D-Xylulose 5-phosphate + D-Erythrose 4-phosphate|D-Glyceraldehyde 3-phosphate + Sedoheptulose 7-phosphate <=> D-Ribose 5-phosphate + D-Xylulose 5-phosphate|D-Ribose 5-phosphate + Aminofructose 6-phosphate <=> Sedoheptulose 7-phosphate + Iminoerythrose 4-phosphate|Formaldehyde + D-Xylulose 5-phosphate <=> D-Glyceraldehyde 3-phosphate + Glyc…	2.2.1.1|2.2.1.3	Carbon metabolism|Pentose phosphate pathway (PPP)
PBANKA_0202300	R00158_c|R00158_r|R00512_c|R01665_c	ATP + CMP <=> ADP + CDP|ATP + UMP <=> ADP + UDP|ATP + dCMP <=> ADP + dCDP	2.7.4.14 2.7.4.25|2.7.4.4 2.7.4.14 2.7.4.22	Pyrimidine metabolism
PBANKA_0203100	R03469_c	ATP + 1-Phosphatidyl-1D-myo-inositol 4-phosphate <=> ADP + 1-Phosphatidyl-D-myo-inositol 4,5-bisphosphate	2.7.1.68	Inositol phosphate (vit B8) metabolism
PBANKA_0203800	R03660_c	ATP + L-Phenylalanine + H+ + tRNA(Phe) <=> Diphosphate + AMP + L-Phenylalanyl-tRNA(Phe)	6.1.1.20	Aminoacyl-tRNA biosynthesis
PBANKA_0208700	R05884_a|R08210_a	2 H+ + 2 Reduced ferredoxin + 1-Hydroxy-2-methyl-2-butenyl 4-diphosphate + [4Fe-4S] iron-sulfur cluster <=> H2O + Isopentenyl diphosphate + 2 Oxidized ferredoxin + [2Fe-2S] iron-sulfur cluster + 2 Fe2+|H2O + 2 Oxidized ferredoxin + Dimethylallyl diphosphate + [2Fe-2S] iron-sulfur cluster + 2 Fe2+ <=> 2 H+ + 2 Reduced ferredoxin + 1-Hydroxy-2-methyl-2-butenyl 4-diphosphate + [4Fe-4S] iron-sulfur c…	1.17.1.2	Isoprenoid metabolism
PBANKA_0210200	R05577_c	ATP + L-Aspartate + H+ + tRNA(Asp) <=> Diphosphate + AMP + L-Aspartyl-tRNA(Asp)	6.1.1.12 6.1.1.23	Aminoacyl-tRNA biosynthesis
PBANKA_0211300	R07460_m	L-Cysteine + [Enzyme]-cysteine <=> L-Alanine + [Enzyme]-S-sulfanylcysteine	2.8.1.7	Thiamine (vit B1) metabolism
PBANKA_0300800	R09247_c|R09247_m|R09248_c|R09248_m|R09249_c|R09249_m	4 Isopentenyl diphosphate + trans,trans-Farnesyl diphosphate <=> 4 Diphosphate + all-trans-Heptaprenyl diphosphate|5 Isopentenyl diphosphate + trans,trans-Farnesyl diphosphate <=> 5 Diphosphate + all-trans-Octaprenyl diphosphate|7 Isopentenyl diphosphate + trans,trans-Farnesyl diphosphate <=> 7 Diphosphate + all-trans-Decaprenyl diphosphate|trans,trans-Farnesyl diphosphate + 4 Isopentenyl diphosp…	2.5.1.30|2.5.1.90|2.5.1.91	Terpenoid backbone biosynthesis
PBANKA_0302300	R00355_c|R00694_c|R00734_c|R00896_c|R02433_c|R02619_c|R05052_c	2-Oxoglutarate + 3-Sulfino-L-alanine <=> L-Glutamate + 3-Sulfinylpyruvate|2-Oxoglutarate + L-Aspartate <=> L-Glutamate + Oxaloacetate|2-Oxoglutarate + L-Cysteate <=> L-Glutamate + 3-Sulfopyruvate|2-Oxoglutarate + L-Cysteine <=> DL-Glutamate + Mercaptopyruvate|2-Oxoglutarate + L-Phenylalanine <=> L-Glutamate + Phenylpyruvate|2-Oxoglutarate + L-Tyrosine <=> L-Glutamate + 3-(4-Hydroxyphenyl)pyruvate…	2.6.1.1|2.6.1.1 2.6.1.23|2.6.1.1 2.6.1.5 2.6.1.9 2.6.1.57	Alanine, aspartate and glutamate metabolism|Arginine and proline metabolism|Cysteine and methionine metabolism|Phenylalanine metabolism|Ubiquinone and other terpenoid-quinone biosynthesis
PBANKA_0302700	R04983_m|R04990_m|R04993_m	S-Adenosyl-L-methionine + 2-Demethylmenaquinone <=> S-Adenosyl-L-homocysteine + Menaquinone-4|S-Adenosyl-L-methionine + 2-Hexaprenyl-6-methoxy-1,4-benzoquinone <=> S-Adenosyl-L-homocysteine + H+ + 2-Hexaprenyl-3-methyl-6-methoxy-1,4-benzoquinone|S-Adenosyl-L-methionine + 2-Octaprenyl-6-methoxy-1,4-benzoquinone <=> S-Adenosyl-L-homocysteine + H+ + 2-Octaprenyl-3-methyl-6-methoxy-1,4-benzoquinone	2.1.1.163|2.1.1.201	Ubiquinone and other terpenoid-quinone biosynthesis
PBANKA_0308200	R10707_a	Acetyl-CoA + H+ + Malonyl-[acyl-carrier protein] <=> CoA + CO2 + Acetoacetyl-[acp]	2.3.1.180	Fatty acid metabolism / FASII
PBANKA_0404800	R00848_a|R00848_m	FAD + sn-Glycerol 3-phosphate <=> Glycerone phosphate + FADH2|sn-Glycerol 3-phosphate + FAD <=> Glycerone phosphate + FADH2	1.1.5.3	Glycerophospholipid metabolism
PBANKA_0409200	R03665_a	ATP + H+ + L-Valine + tRNA(Val) <=> Diphosphate + AMP + L-Valyl-tRNA(Val)	6.1.1.9	Aminoacyl-tRNA biosynthesis
PBANKA_0414400	Tc2eC00186_c|Tc2eC00256_c	H+ + (R)-Lactate <=> H+ + (R)-Lactate|H+ + (S)-Lactate <=> H+ + (S)-Lactate		Transport between c and e
PBANKA_0414800	R00551_c	H2O + L-Arginine <=> L-Ornithine + Urea	3.5.3.1	Arginine and proline metabolism
PBANKA_0505000	R02569_a	Acetyl-CoA + Enzyme N6-(dihydrolipoyl)lysine <=> CoA + [Dihydrolipoyllysine-residue acetyltransferase] S-acetyldihydrolipoyllysine	2.3.1.12	Isoprenoid metabolism
PBANKA_0507000	R08689_a|R10859_a	2 Reduced ferredoxin + 2-C-Methyl-D-erythritol 2,4-cyclodiphosphate + [4Fe-4S] iron-sulfur cluster <=> H2O + 2 Oxidized ferredoxin + 1-Hydroxy-2-methyl-2-butenyl 4-diphosphate + [2Fe-2S] iron-sulfur cluster + 2 Fe2+|H2O + 1-Hydroxy-2-methyl-2-butenyl 4-diphosphate + Oxidized flavodoxin + [4Fe-4S] iron-sulfur cluster <=> 2-C-Methyl-D-erythritol 2,4-cyclodiphosphate + Reduced flavodoxin + [2Fe-2S] …	1.17.7.1|1.17.7.3	Isoprenoid metabolism|Terpenoid backbone biosynthesis
PBANKA_0507400	R00965_c	H+ + Orotidine 5-phosphate <=> CO2 + UMP	4.1.1.23	Pyrimidine biosynthesis
PBANKA_0512200	R03222_m	3 Oxygen + Protoporphyrinogen IX <=> 3 Hydrogen peroxide + Protoporphyrin	1.3.3.4	Heme biosynthesis
PBANKA_0516200	R05916_c	UDP-N-acetyl-D-glucosamine + 1-Phosphatidyl-D-myo-inositol <=> UDP + G00143	2.4.1.198	Glycosylphosphatidylinositol(GPI)-anchor biosynthesis
PBANKA_0516900	R00178_c|R00670_c	L-Ornithine + H+ <=> CO2 + Putrescine|S-Adenosyl-L-methionine + H+ <=> CO2 + S-Adenosylmethioninamine	4.1.1.17|4.1.1.50	Cysteine and methionine metabolism|Glutathione metabolism
PBANKA_0518700	R03659_c|R04773_c	ATP + L-Methionine + H+ + tRNA(Met) <=> Diphosphate + AMP + L-Methionyl-tRNA|ATP + tRNA(Met) + L-Selenomethionine <=> Diphosphate + AMP + Selenomethionyl-tRNA(Met)	6.1.1.10	Aminoacyl-tRNA biosynthesis
PBANKA_0520000	R00200_a|R00430_a|R01138_a|R01858_a|R02320_a	ATP + Pyruvate <=> ADP + Phosphoenolpyruvate|Pyruvate + GTP <=> GDP + Phosphoenolpyruvate|Pyruvate + Nucleoside triphosphate <=> Phosphoenolpyruvate + NDP|Pyruvate + dATP <=> Phosphoenolpyruvate + dADP|Pyruvate + dGTP <=> Phosphoenolpyruvate + dGDP	2.7.1.40	Isoprenoid metabolism|Purine metabolism
PBANKA_0522400	R02352_r|R02353_r|R04681_r|R04682_r|R07759_r|R08945_r|R08980_r	NAD+ + Estradiol-17beta <=> NADH + H+ + Estrone|NAD+ + Estriol <=> NADH + H+ + 16alpha-Hydroxyestrone|NADH + H+ + 11beta-Hydroxyandrost-4-ene-3,17-dione <=> NAD+ + 11beta,17beta-Dihydroxy-4-androsten-3-one|NADP+ + Estradiol-17beta <=> NADPH + H+ + Estrone|NADP+ + Estriol <=> NADPH + H+ + 16alpha-Hydroxyestrone|NADPH + H+ + 11beta-Hydroxyandrost-4-ene-3,17-dione <=> NADP+ + 11beta,17beta-Dihydroxy…	1.1.1.330|1.1.1.51 1.1.1.62|1.1.1.62	Fatty acid metabolism / FAE|Steroid metabolism
PBANKA_0608000	R00084_a	H2O + 4 Porphobilinogen <=> 4 NH4+ + Hydroxymethylbilane	2.5.1.61	Heme biosynthesis
PBANKA_0609300	R05919_r	Dolichyl phosphate D-mannose + G00145 <=> Dolichyl phosphate + G00146		Glycosylphosphatidylinositol(GPI)-anchor biosynthesis
PBANKA_0611600	R02017_c|R02018_c|R02019_c|R02024_c|R08363_c|R08364_c	H2O + Thioredoxin disulfide + dCDP <=> CDP + Thioredoxin|H2O + Thioredoxin disulfide + dGDP <=> GDP + Thioredoxin|H2O + Trypanothione disulfide + 2-Deoxyribonucleoside diphosphate <=> Trypanothione + Ribonucleoside diphosphate|H2O + dADP + Thioredoxin disulfide <=> ADP + Thioredoxin|Ribonucleoside diphosphate + Tryparedoxin <=> H2O + 2-Deoxyribonucleoside diphosphate + Tryparedoxin disulfide|UDP …	1.17.4.1	Purine metabolism
PBANKA_0614300	R07460_a|R09366_a	H2O + Se-Methyl-L-selenocysteine <=> NH4+ + Pyruvate + Methaneselenol|L-Cysteine + [Enzyme]-cysteine <=> L-Alanine + [Enzyme]-S-sulfanylcysteine	4.4.1.1 4.4.1.13	FeS cluster biosynthesis|Selenocompound metabolism
PBANKA_0702500	R03657_a	ATP + H+ + L-Leucine + tRNA(Leu) <=> Diphosphate + AMP + L-Leucyl-tRNA	6.1.1.4	Aminoacyl-tRNA biosynthesis
PBANKA_0707000	R07766_a|R07769_a	Lipoyl-[acp] + Apoprotein <=> Acyl-carrier protein + Protein N6-(lipoyl)lysine|Octanoyl-[acp] + Apoprotein <=> Acyl-carrier protein + Protein N6-(octanoyl)lysine	2.3.1.181	Lipoic acid metabolism
PBANKA_0710600	R01801_r	sn-Glycerol 3-phosphate + CDP-diacylglycerol <=> CMP + Phosphatidylglycerophosphate	2.7.8.5	Glycerophospholipid metabolism
PBANKA_0714900	R01698_a|R03815_a|R07618_a|R08549_a	NAD+ + CoA + 2-Oxoglutarate <=> NADH + CO2 + Succinyl-CoA|NAD+ + Dihydrolipoamide <=> NADH + H+ + Lipoamide|NAD+ + Dihydrolipoylprotein <=> NADH + H+ + Lipoylprotein|NAD+ + Enzyme N6-(dihydrolipoyl)lysine <=> NADH + H+ + Enzyme N6-(lipoyl)lysine	1.2.4.2 1.8.1.4 2.3.1.61|1.8.1.4	Glycine, serine and threonine metabolism|Isoprenoid metabolism|Propanoate metabolism
PBANKA_0717600	GAK_m	AMP + GTP <=> ADP + GDP	2.7.4.10	Purine metabolism
PBANKA_0718100	R03905_c|R04212_c	ADP + Orthophosphate + L-Glutamate + Glutaminyl-tRNA <=> H2O + ATP + L-Glutamine + L-Glutamyl-tRNA(Gln)|ADP + Orthophosphate + L-Glutamate + L-Asparaginyl-tRNA(Asn) <=> H2O + ATP + L-Glutamine + L-Aspartyl-tRNA(Asn)	6.3.5.6|6.3.5.7	Aminoacyl-tRNA biosynthesis
PBANKA_0719300	R00936_c|R00937_c|R00939_c|R00940_c|R02101_c|R02235_c|R02236_c	2 NAD+ + Tetrahydrofolate <=> 2 NADH + 2 H+ + Folate|2 NADP+ + Tetrahydrofolate <=> 2 NADPH + 2 H+ + Folate|5,10-Methylenetetrahydrofolate + dUMP <=> dTMP + Dihydrofolate|NAD+ + Dihydrofolate <=> NADH + H+ + Folate|NAD+ + Tetrahydrofolate <=> NADH + H+ + Dihydrofolate|NADP+ + Dihydrofolate <=> NADPH + H+ + Folate|NADP+ + Tetrahydrofolate <=> NADPH + H+ + Dihydrofolate	1.5.1.3|2.1.1.45	Folate biosynthesis
PBANKA_0810400	R09295_r	Protein serine + GDP-L-fucose <=> GDP + Fucosylated protein	2.4.1.221	N-Glycan biosynthesis
PBANKA_0812100	R05916_c	UDP-N-acetyl-D-glucosamine + 1-Phosphatidyl-D-myo-inositol <=> UDP + G00143	2.4.1.198	Glycosylphosphatidylinositol(GPI)-anchor biosynthesis
PBANKA_0814900	R03646_a	ATP + L-Arginine + H+ + tRNA(Arg) <=> Diphosphate + AMP + L-Arginyl-tRNA(Arg)	6.1.1.19	Aminoacyl-tRNA biosynthesis
PBANKA_0816400	R00756_c|R00767_c|R00769_c|R00770_c|R01843_c|R02073_c|R03236_c|R03237_c|R03238_c|R03239_c	ATP + D-Fructose 6-phosphate <=> ADP + D-Fructose 1,6-bisphosphate|ATP + D-Tagatose 6-phosphate <=> ADP + D-Tagatose 1,6-bisphosphate|ATP + Sedoheptulose 7-phosphate <=> ADP + Sedoheptulose 1,7-bisphosphate|CTP + D-Fructose 6-phosphate <=> CDP + D-Fructose 1,6-bisphosphate|CTP + D-Tagatose 6-phosphate <=> CDP + D-Tagatose 1,6-bisphosphate|Diphosphate + D-Fructose 6-phosphate <=> Orthophosphate + …	2.7.1.11|2.7.1.11 2.7.1.56 2.7.1.144|2.7.1.90	Amino sugar and nucleotide sugar metabolism|Pentose phosphate pathway (PPP)
PBANKA_0823400	R01512_c	ATP + H+ + 3-Phospho-D-glycerate <=> ADP + 3-Phospho-D-glyceroyl phosphate	2.7.2.3	Glycolysis
PBANKA_0823800	R01977_a|R02352_a|R02353_a|R04533_a|R04534_a|R04536_a|R04543_a|R04566_a|R04681_a|R04682_a|R04953_a|R04964_a|R07759_a|R07763_a|R08945_a|R08980_a	NAD+ + Estradiol-17beta <=> NADH + H+ + Estrone|NAD+ + Estriol <=> NADH + H+ + 16alpha-Hydroxyestrone|NADH + H+ + 11beta-Hydroxyandrost-4-ene-3,17-dione <=> NAD+ + 11beta,17beta-Dihydroxy-4-androsten-3-one|NADP+ + (3R)-3-Hydroxybutanoyl-[acyl-carrier protein] <=> NADPH + H+ + Acetoacetyl-[acp]|NADP+ + (3R)-3-Hydroxydecanoyl-[acyl-carrier protein] <=> NADPH + H+ + 3-Oxodecanoyl-[acp]|NADP+ + (3R)-…	1.1.1.100|1.1.1.100 2.3.1.85 2.3.1.86|1.1.1.330|1.1.1.36|1.1.1.51 1.1.1.62|1.1.1.62	Fatty acid metabolism / FASII|Steroid metabolism
PBANKA_0826100	R03661_a	ATP + H+ + L-Proline + tRNA(Pro) <=> Diphosphate + AMP + L-Prolyl-tRNA(Pro)	6.1.1.15	Aminoacyl-tRNA biosynthesis
PBANKA_0828700	R02055_r	H+ + Phosphatidylserine <=> CO2 + Phosphatidylethanolamine	4.1.1.65	Glycerophospholipid metabolism
PBANKA_0834800	R03655_a	ATP + H+ + L-Histidine + tRNA(His) <=> Diphosphate + AMP + L-Histidyl-tRNA(His)	6.1.1.21	Aminoacyl-tRNA biosynthesis
PBANKA_0906600	R03220_c	Oxygen + 2 H+ + Coproporphyrinogen III <=> 2 H2O + 2 CO2 + Protoporphyrinogen IX	1.3.3.3	Heme biosynthesis
PBANKA_0907400	R01009_r	GDP-mannose + Dolichyl phosphate <=> GDP + Dolichyl phosphate D-mannose	2.4.1.83	N-Glycan biosynthesis
PBANKA_0912700	R07761_r	NADPH + H+ + (2E)-Octadecenoyl-CoA <=> NADP+ + Stearoyl-CoA	1.3.1.38	Fatty acid metabolism / FAE
PBANKA_0918200	R08193_c	N-Acetyl-D-glucosamine 6-phosphate <=> N-Acetyl-alpha-D-glucosamine 1-phosphate	5.4.2.3	Amino sugar and nucleotide sugar metabolism
PBANKA_0919300	R01153_c|R01920_c|R02869_c|R08359_c	Putrescine + S-Adenosylmethioninamine <=> H+ + 5-Methylthioadenosine + Spermidine|S-Adenosyl-L-methionine + Putrescine <=> S-Adenosyl-L-homocysteine + H+ + N-Methylputrescine|S-Adenosylmethioninamine + Cadaverine <=> H+ + 5-Methylthioadenosine + Aminopropylcadaverine|Spermidine + S-Adenosylmethioninamine <=> H+ + 5-Methylthioadenosine + Spermine	2.1.1.53|2.5.1.16|2.5.1.16 2.5.1.22	Glutathione metabolism
PBANKA_0919800	R01658_c|R02003_c|R02061_c	Isopentenyl diphosphate + Dimethylallyl diphosphate <=> Diphosphate + Geranyl diphosphate|Isopentenyl diphosphate + Geranyl diphosphate <=> Diphosphate + trans,trans-Farnesyl diphosphate|Isopentenyl diphosphate + trans,trans-Farnesyl diphosphate <=> Diphosphate + Geranylgeranyl diphosphate	2.5.1.1|2.5.1.10|2.5.1.29	Terpenoid backbone biosynthesis
PBANKA_0922300	R03663_a|R03663_c	ATP + L-Threonine + tRNA(Thr) <=> Diphosphate + AMP + L-Threonyl-tRNA(Thr)	6.1.1.3	Aminoacyl-tRNA biosynthesis
PBANKA_0923800	R00014_a|R01699_a|R03270_a	2-(alpha-Hydroxyethyl)thiamine diphosphate + Enzyme N6-(lipoyl)lysine <=> Thiamin diphosphate + [Dihydrolipoyllysine-residue acetyltransferase] S-acetyldihydrolipoyllysine|Pyruvate + H+ + Enzyme N6-(lipoyl)lysine <=> CO2 + [Dihydrolipoyllysine-residue acetyltransferase] S-acetyldihydrolipoyllysine|Pyruvate + Thiamin diphosphate + H+ <=> CO2 + 2-(alpha-Hydroxyethyl)thiamine diphosphate	1.2.4.1|1.2.4.1 2.2.1.6 4.1.1.1	Isoprenoid metabolism
PBANKA_0927800	R09382_c|R09383_c|R09384_c|R09386_c	ATP + 2 CTP + tRNA precursor <=> 3 Diphosphate + tRNA with a 3 CCA end|ATP + tRNA with a 3 CC end <=> Diphosphate + tRNA with a 3 CCA end|CTP + tRNA precursor <=> Diphosphate + tRNA with a 3 cytidine|CTP + tRNA with a 3 cytidine <=> Diphosphate + tRNA with a 3 CC end	2.7.7.72	Aminoacyl-tRNA biosynthesis
PBANKA_0928100	R01516_c|R01518_c|R01662_c	2-Phospho-D-glycerate <=> 3-Phospho-D-glycerate|3-Phospho-D-glyceroyl phosphate <=> H+ + 2,3-Bisphospho-D-glycerate|H2O + 2,3-Bisphospho-D-glycerate <=> Orthophosphate + H+ + 3-Phospho-D-glycerate	3.1.3.13|5.4.2.11 5.4.2.12|5.4.2.4	Glycolysis
PBANKA_0930500	R02918_a|R02918_c	ATP + H+ + L-Tyrosine + tRNA(Tyr) <=> Diphosphate + AMP + L-Tyrosyl-tRNA(Tyr)	6.1.1.1	Aminoacyl-tRNA biosynthesis
PBANKA_0931400	R05976_r	Protein asparagine + G00008 <=> Dolichyl diphosphate + N-Glycan	2.4.99.18	N-Glycan biosynthesis
PBANKA_0938500	R00405_m|R00432_m|R00727_m|R02404_m	ATP + CoA + Itaconate <=> ADP + Orthophosphate + Itaconyl-CoA|ATP + CoA + Succinate <=> ADP + Orthophosphate + Succinyl-CoA|CoA + Succinate + GTP <=> Orthophosphate + GDP + Succinyl-CoA|CoA + Succinate + ITP <=> Orthophosphate + Succinyl-CoA + IDP	6.2.1.4|6.2.1.5	C5-Branched dibasic acid metabolism|Citrate cycle (TCA cycle)
PBANKA_0942900	R03660_c	ATP + L-Phenylalanine + H+ + tRNA(Phe) <=> Diphosphate + AMP + L-Phenylalanyl-tRNA(Phe)	6.1.1.20	Aminoacyl-tRNA biosynthesis
PBANKA_1013200	R00405_m|R00432_m|R00727_m|R02404_m	ATP + CoA + Itaconate <=> ADP + Orthophosphate + Itaconyl-CoA|ATP + CoA + Succinate <=> ADP + Orthophosphate + Succinyl-CoA|CoA + Succinate + GTP <=> Orthophosphate + GDP + Succinyl-CoA|CoA + Succinate + ITP <=> Orthophosphate + Succinyl-CoA + IDP	6.2.1.4|6.2.1.5	C5-Branched dibasic acid metabolism|Citrate cycle (TCA cycle)
PBANKA_1022800	R03654_a|R03654_c	ATP + Glycine + H+ + tRNA(Gly) <=> Diphosphate + AMP + Glycyl-tRNA(Gly)	6.1.1.14	Aminoacyl-tRNA biosynthesis
PBANKA_1025900	R03658_a	ATP + L-Lysine + tRNA(Lys) <=> Diphosphate + AMP + L-Lysyl-tRNA	6.1.1.6	Aminoacyl-tRNA biosynthesis
PBANKA_1032300	R00571_c|R00573_c	ATP + NH4+ + UTP <=> ADP + Orthophosphate + CTP + 2 H+|H2O + ATP + L-Glutamine + UTP <=> ADP + Orthophosphate + L-Glutamate + CTP + 2 H+	6.3.4.2	Pyrimidine metabolism
PBANKA_1032600	R01799_c|R01799_r	CTP + Phosphatidate <=> CDP-diacylglycerol + Diphosphate|CTP + Phosphatidate <=> Diphosphate + CDP-diacylglycerol	2.7.7.41	Glycerophospholipid metabolism
PBANKA_1036600	R02017_c|R02018_c|R02019_c|R02024_c|R08363_c|R08364_c	H2O + Thioredoxin disulfide + dCDP <=> CDP + Thioredoxin|H2O + Thioredoxin disulfide + dGDP <=> GDP + Thioredoxin|H2O + Trypanothione disulfide + 2-Deoxyribonucleoside diphosphate <=> Trypanothione + Ribonucleoside diphosphate|H2O + dADP + Thioredoxin disulfide <=> ADP + Thioredoxin|Ribonucleoside diphosphate + Tryparedoxin <=> H2O + 2-Deoxyribonucleoside diphosphate + Tryparedoxin disulfide|UDP …	1.17.4.1	Purine metabolism
PBANKA_1102800	R05634_a	ATP + 4-(Cytidine 5-diphospho)-2-C-methyl-D-erythritol <=> ADP + 2-Phospho-4-(cytidine 5-diphospho)-2-C-methyl-D-erythritol	2.7.1.148	Isoprenoid metabolism
PBANKA_1107900	Tc2aC00074_c|Tc2aC00111_c	Glycerone phosphate + Orthophosphate <=> Orthophosphate + Glycerone phosphate|Phosphoenolpyruvate + Orthophosphate <=> Orthophosphate + Phosphoenolpyruvate		Transport between c and a
PBANKA_1109200	R03648_a|R03648_c	ATP + H+ + L-Asparagine + tRNA(Asn) <=> Diphosphate + AMP + L-Asparaginyl-tRNA(Asn)	6.1.1.22	Aminoacyl-tRNA biosynthesis
PBANKA_1110700	R02222_r|rat021526_r	NADH + Oxygen + H+ + (9Z)-Octadecenoic acid <=> 2 H2O + NAD+ + Linoleate|Oxygen + 2 H+ + Stearoyl-CoA + 2 Ferrocytochrome b5 <=> 2 H2O + Oleoyl-CoA + 2 Ferricytochrome b5	1.14.19.-|1.14.19.1	Fatty acid metabolism / FAE
PBANKA_1111400	R07324_c	D-Glucose 6-phosphate <=> 1D-myo-Inositol 3-phosphate	5.5.1.4	Inositol phosphate (vit B8) metabolism
PBANKA_1112400	R01870_c	Diphosphate + Orotidine 5-phosphate <=> 5-Phospho-alpha-D-ribose 1-diphosphate + Orotate	2.4.2.10	Pyrimidine biosynthesis
PBANKA_1113000	R01561_c|R01863_c|R01876_c|R01969_c|R02147_c|R02294_c|R02295_c|R02297_c|R02484_c|R02557_c|R02748_c|R08229_c|R08368_c|R10244_c	Orthophosphate + H+ + Adenosine <=> Adenine + alpha-D-Ribose 1-phosphate|Orthophosphate + H+ + Deoxyadenosine <=> Adenine + 2-Deoxy-D-ribose 1-phosphate|Orthophosphate + H+ + Deoxyguanosine <=> Guanine + 2-Deoxy-D-ribose 1-phosphate|Orthophosphate + H+ + Deoxyinosine <=> Hypoxanthine + 2-Deoxy-D-ribose 1-phosphate|Orthophosphate + H+ + Deoxyuridine <=> Uracil + 2-Deoxy-D-ribose 1-phosphate|Orthop…	2.4.2.1|2.4.2.1 2.4.2.-|2.4.2.1 2.4.2.15|2.4.2.1 2.4.2.2 2.4.2.3 2.4.2.4|2.4.2.1 2.4.2.4|2.4.2.2 2.4.2.3|2.4.2.3	Drug metabolism - other enzymes|Nicotinate and nicotinamide (vit B3) metabolism|Purine metabolism|Pyrimidine metabolism
PBANKA_1114000	R05577_a	ATP + L-Aspartate + H+ + tRNA(Asp) <=> Diphosphate + AMP + L-Aspartyl-tRNA(Asp)	6.1.1.12 6.1.1.23	Aminoacyl-tRNA biosynthesis
PBANKA_1114900	R03362_c	ATP + 1-Phosphatidyl-D-myo-inositol <=> ADP + 1-Phosphatidyl-1D-myo-inositol 3-phosphate	2.7.1.137	Inositol phosphate (vit B8) metabolism
PBANKA_1117700	R00342_c|R07136_c	NAD+ + (2R)-3-Sulfolactate <=> NADH + H+ + 3-Sulfopyruvate|NAD+ + (S)-Malate <=> NADH + Oxaloacetate + H+	1.1.1.37 1.1.1.299|1.1.1.37 1.1.1.337	Cysteine and methionine metabolism|Pyruvate metabolism
PBANKA_1121700	R03657_c	ATP + H+ + L-Leucine + tRNA(Leu) <=> Diphosphate + AMP + L-Leucyl-tRNA	6.1.1.4	Aminoacyl-tRNA biosynthesis
PBANKA_1123600	R05917_c	H2O + G00143 <=> Acetate + G00144	3.5.1.89	Glycosylphosphatidylinositol(GPI)-anchor biosynthesis
PBANKA_1125100	R04355_a|R04726_a|R04952_a|R04957_a|R04960_a|R04963_a|R04968_a|R07762_a|R10115_a|R10119_a	H+ + Malonyl-[acyl-carrier protein] + Acetyl-[acyl-carrier protein] <=> CO2 + Acyl-carrier protein + Acetoacetyl-[acp]|H+ + Malonyl-[acyl-carrier protein] + Butyryl-[acp] <=> CO2 + Acyl-carrier protein + 3-Oxohexanoyl-[acp]|H+ + Malonyl-[acyl-carrier protein] + Decanoyl-[acp] <=> CO2 + Acyl-carrier protein + 3-Oxododecanoyl-[acp]|H+ + Malonyl-[acyl-carrier protein] + Dodecanoyl-[acyl-carrier prot…	2.3.1.41 2.3.1.179|2.3.1.41 2.3.1.179 2.3.1.199|2.3.1.41 2.3.1.85 2.3.1.86 2.3.1.179	Fatty acid metabolism / FASII
PBANKA_1125600	R00200_c|R00430_c|R01138_c|R01858_c|R02320_c	ATP + Pyruvate <=> ADP + Phosphoenolpyruvate|Pyruvate + GTP <=> GDP + Phosphoenolpyruvate|Pyruvate + Nucleoside triphosphate <=> Phosphoenolpyruvate + NDP|Pyruvate + dATP <=> Phosphoenolpyruvate + dADP|Pyruvate + dGTP <=> Phosphoenolpyruvate + dGDP	2.7.1.40	Glycolysis|Purine metabolism
PBANKA_1127000	R01321_c|R01321_r|R02057&R02038_r|R02057_c|R04321_c|R04321_r|R04920_c|R04920_r|R04922_c|R04922_r|R06364_c|R06364_r|R07384_c|R07384_r|R07389_c|R07389_r	1,2-Diacyl-sn-glycerol + CMP-2-aminoethylphosphonate <=> CMP + Diacylglyceryl-2-aminoethylphosphonate|1,2-Diacyl-sn-glycerol + CMP-N-trimethyl-2-aminoethylphosphonate <=> CMP + Diacylglyceryl-N-trimethyl-2-aminoethylphosphonate|1,2-Diacyl-sn-glycerol + CTP + Ethanolamine phosphate <=> CMP + H+ + Phosphatidylethanolamine + Diphosphate|CDP-choline + 1,2-Diacyl-sn-glycerol <=> CMP + Phosphatidylchol…	2.7.8.1|2.7.8.1+2.7.7.14|2.7.8.2	Ether lipid metabolism|Glycerophospholipid metabolism|Phosphonate and phosphinate metabolism
PBANKA_1127500	R03905_c|R04212_c	ADP + Orthophosphate + L-Glutamate + Glutaminyl-tRNA <=> H2O + ATP + L-Glutamine + L-Glutamyl-tRNA(Gln)|ADP + Orthophosphate + L-Glutamate + L-Asparaginyl-tRNA(Asn) <=> H2O + ATP + L-Glutamine + L-Aspartyl-tRNA(Asn)	6.3.5.6|6.3.5.7	Aminoacyl-tRNA biosynthesis
PBANKA_1127700	R01271_c|R01724_c	Diphosphate + Nicotinamide D-ribonucleotide <=> H+ + 5-Phospho-alpha-D-ribose 1-diphosphate + Nicotinamide|Diphosphate + Nicotinate D-ribonucleotide <=> H+ + 5-Phospho-alpha-D-ribose 1-diphosphate + Nicotinate	2.4.2.12|6.3.4.21	Nicotinate and nicotinamide (vit B3) metabolism
PBANKA_1133500	R03651_a|R05578_a	ATP + L-Glutamate + H+ + tRNA(Glu) <=> Diphosphate + AMP + L-Glutamyl-tRNA(Glu)|ATP + L-Glutamate + tRNA(Gln) <=> Diphosphate + AMP + L-Glutamyl-tRNA(Gln)	6.1.1.17 6.1.1.24|6.1.1.24	Aminoacyl-tRNA biosynthesis
PBANKA_1135400	R00549_c	ATP + Riboflavin <=> ADP + FMN	2.7.1.26	Riboflavin (vit B2) metabolism
PBANKA_1140700	R00310_m	Protoporphyrin + Fe2+ <=> Heme + 2 H+	4.99.1.1	Heme biosynthesis
PBANKA_1143400	R00100_c|R00100_r|rat021526_r	NADH + 2 Ferricytochrome b5 <=> NAD+ + H+ + 2 Ferrocytochrome b5|NADH + Oxygen + H+ + (9Z)-Octadecenoic acid <=> 2 H2O + NAD+ + Linoleate	1.14.19.-|1.6.2.2	Fatty acid metabolism / FAE|Redox metabolism
PBANKA_1143600	R03038_a|R03038_c	ATP + L-Alanine + H+ + tRNA(Ala) <=> Diphosphate + AMP + L-Alanyl-tRNA	6.1.1.7	Aminoacyl-tRNA biosynthesis
PBANKA_1203300	R03659_a|R04773_a	ATP + L-Methionine + H+ + tRNA(Met) <=> Diphosphate + AMP + L-Methionyl-tRNA|ATP + tRNA(Met) + L-Selenomethionine <=> Diphosphate + AMP + Selenomethionyl-tRNA(Met)	6.1.1.10	Aminoacyl-tRNA biosynthesis
PBANKA_1207200	R00127_c|R00157_c|R01547_c	AMP + UTP <=> ADP + UDP|ATP + AMP <=> 2 ADP|ATP + dAMP <=> ADP + dADP	2.7.4.10|2.7.4.3|2.7.4.3 2.7.4.11	Purine metabolism|Pyrimidine metabolism
PBANKA_1210800	R00190_c|R01132_c|R01229_c|R02142_c|R08237_c|R08238_c|R08245_c	5-Phospho-alpha-D-ribose 1-diphosphate + 6-Mercaptopurine <=> Diphosphate + 6-Thioinosine-5-monophosphate|5-Phospho-alpha-D-ribose 1-diphosphate + 6-Methylmercaptopurine <=> Diphosphate + 6-Methylthiopurine 5-monophosphate ribonucleotide|5-Phospho-alpha-D-ribose 1-diphosphate + Thioguanine <=> Diphosphate + 6-Thioguanosine monophosphate|Diphosphate + AMP <=> 5-Phospho-alpha-D-ribose 1-diphosphate…	2.4.2.7 2.4.2.8|2.4.2.7 2.4.2.8 2.4.2.22|2.4.2.8|2.4.2.8 2.4.2.22	Drug metabolism - other enzymes|Purine metabolism
PBANKA_1211900	R03332_c|R03435_c|R10952_c	H2O + 1-Phosphatidyl-1D-myo-inositol 4-phosphate <=> 1,2-Diacyl-sn-glycerol + 1D-myo-Inositol 1,4-bisphosphate|H2O + 1-Phosphatidyl-D-myo-inositol 4,5-bisphosphate <=> 1,2-Diacyl-sn-glycerol + D-myo-Inositol 1,4,5-trisphosphate|H2O + 1-Phosphatidyl-D-myo-inositol <=> 1,2-Diacyl-sn-glycerol + Inositol 1-phosphate	3.1.4.11|3.1.4.3 3.1.4.11 4.6.1.13	Inositol phosphate (vit B8) metabolism
PBANKA_1213400	R00161_c	ATP + FMN <=> Diphosphate + FAD	2.7.7.2	Riboflavin (vit B2) metabolism
PBANKA_1213600	R03650_a|R03650_c	ATP + H+ + L-Cysteine + tRNA(Cys) <=> Diphosphate + AMP + L-Cysteinyl-tRNA(Cys)	6.1.1.16	Aminoacyl-tRNA biosynthesis
PBANKA_1214300	R00658_c	2-Phospho-D-glycerate <=> H2O + Phosphoenolpyruvate	4.2.1.11	Glycolysis
PBANKA_1216200	R02251_c|R02251_r	CoA + Triacylglycerol <=> 1,2-Diacyl-sn-glycerol + Acyl-CoA|CoA + Triacylglycerol <=> Acyl-CoA + 1,2-Diacyl-sn-glycerol	2.3.1.20	Glycerolipid metabolism
PBANKA_1217300	R05969_r	Dolichyl phosphate + UDP-N-acetyl-D-glucosamine <=> N-Acetyl-D-glucosaminyldiphosphodolichol + UMP	2.7.8.15	N-Glycan biosynthesis
PBANKA_1229800	R01404_a|R04429_a|R04430_a|R04724_a|R04725_a|R04955_a|R04956_a|R04958_a|R04959_a|R04961_a|R04962_a|R04966_a|R04967_a|R04969_a|R04970_a|R07765_a|R10118_a|R10122_a	NAD+ + Butyryl-[acp] <=> NADH + H+ + But-2-enoyl-[acyl-carrier protein]|NAD+ + Decanoyl-[acp] <=> NADH + H+ + trans-Dec-2-enoyl-[acp]|NAD+ + Dodecanoyl-[acyl-carrier protein] <=> NADH + H+ + trans-Dodec-2-enoyl-[acp]|NAD+ + Hexadecanoyl-[acp] <=> NADH + H+ + trans-Hexadec-2-enoyl-[acp]|NAD+ + Hexanoyl-[acp] <=> NADH + H+ + trans-Hex-2-enoyl-[acp]|NAD+ + Octanoyl-[acp] <=> NADH + H+ + trans-Oct-2-…	1.3.1.10|1.3.1.10 1.3.1.39 1.3.1.104|1.3.1.10 1.3.1.39 1.3.1.104 2.3.1.85|1.3.1.9 2.3.1.86|1.3.1.93	Fatty acid metabolism / FASII
PBANKA_1234100	R07411_m	H2O + Heme + trans,trans-Farnesyl diphosphate <=> Diphosphate + Heme O	2.5.1.-	Ubiquinone and other terpenoid-quinone biosynthesis
PBANKA_1239900	R01280_c|R01280_r	ATP + CoA + H+ + Hexadecanoic acid <=> Diphosphate + AMP + Palmitoyl-CoA|ATP + CoA + H+ + Hexadecanoic acid <=> Palmitoyl-CoA + Diphosphate + AMP	6.2.1.3	Fatty acid degradation|Fatty acid metabolism / FAE
PBANKA_1303800	R01015_a	D-Glyceraldehyde 3-phosphate <=> Glycerone phosphate	5.3.1.1	Isoprenoid metabolism
PBANKA_1304100	R00036_a	2 5-Aminolevulinate <=> 2 H2O + H+ + Porphobilinogen	4.2.1.24	Heme biosynthesis
PBANKA_1307600	R00130_c	ATP + Dephospho-CoA <=> ADP + CoA	2.7.1.24	Pantothenate (vit B5) metabolism / CoA biosynthesis
PBANKA_1308600	R01068_c|R01829_c|R02568_c	D-Fructose 1,6-bisphosphate <=> Glycerone phosphate + D-Glyceraldehyde 3-phosphate|D-Fructose 1-phosphate <=> Glycerone phosphate + D-Glyceraldehyde|Sedoheptulose 1,7-bisphosphate <=> Glycerone phosphate + D-Erythrose 4-phosphate	4.1.2.13	Amino sugar and nucleotide sugar metabolism|Glycolysis|Pentose phosphate pathway (PPP)
PBANKA_1308900	R03655_c	ATP + H+ + L-Histidine + tRNA(His) <=> Diphosphate + AMP + L-Histidyl-tRNA(His)	6.1.1.21	Aminoacyl-tRNA biosynthesis
PBANKA_1310100	R00014_a|R01699_a|R03270_a	2-(alpha-Hydroxyethyl)thiamine diphosphate + Enzyme N6-(lipoyl)lysine <=> Thiamin diphosphate + [Dihydrolipoyllysine-residue acetyltransferase] S-acetyldihydrolipoyllysine|Pyruvate + H+ + Enzyme N6-(lipoyl)lysine <=> CO2 + [Dihydrolipoyllysine-residue acetyltransferase] S-acetyldihydrolipoyllysine|Pyruvate + Thiamin diphosphate + H+ <=> CO2 + 2-(alpha-Hydroxyethyl)thiamine diphosphate	1.2.4.1|1.2.4.1 2.2.1.6 4.1.1.1	Isoprenoid metabolism
PBANKA_1325600	R03665_c	ATP + H+ + L-Valine + tRNA(Val) <=> Diphosphate + AMP + L-Valyl-tRNA(Val)	6.1.1.9	Aminoacyl-tRNA biosynthesis
PBANKA_1326400	R01061_c	NAD+ + Orthophosphate + D-Glyceraldehyde 3-phosphate <=> NADH + 3-Phospho-D-glyceroyl phosphate	1.2.1.12 1.2.1.59	Glycolysis
PBANKA_1330600	R05688_a	NADP+ + 2-C-Methyl-D-erythritol 4-phosphate <=> NADPH + H+ + 1-Deoxy-D-xylulose 5-phosphate	1.1.1.267	Isoprenoid metabolism
PBANKA_1332800	R00742_a|R04385_a|R04386_a	ATP + Acetyl-CoA + HCO3- <=> ADP + Orthophosphate + H+ + Malonyl-CoA|ATP + HCO3- + Holo-[carboxylase] <=> ADP + Orthophosphate + H+ + Carboxybiotin-carboxyl-carrier protein|Acetyl-CoA + Carboxybiotin-carboxyl-carrier protein <=> Malonyl-CoA + Holo-[carboxylase]	6.3.4.14|6.4.1.2	Fatty acid metabolism / FAS II / biotin (vit B7) dependent|Fatty acid metabolism / FASII|Fatty acid metabolism / FASII / biotin (vit B7) dependent
PBANKA_1338200	R04428_a|R04535_a|R04537_a|R04544_a|R04568_a|R04954_a|R04965_a|R07764_a|R10117_a|R10121_a	(3R)-3-Hydroxybutanoyl-[acyl-carrier protein] <=> H2O + But-2-enoyl-[acyl-carrier protein]|(3R)-3-Hydroxydecanoyl-[acyl-carrier protein] <=> H2O + trans-Dec-2-enoyl-[acp]|(3R)-3-Hydroxyoctanoyl-[acyl-carrier protein] <=> H2O + trans-Oct-2-enoyl-[acp]|(3R)-3-Hydroxypalmitoyl-[acyl-carrier protein] <=> H2O + trans-Hexadec-2-enoyl-[acp]|(3R)-3-Hydroxytetradecanoyl-[acyl-carrier protein] <=> H2O + tr…	2.3.1.85 2.3.1.86 4.2.1.59|4.2.1.134|4.2.1.59	Fatty acid metabolism / FASII
PBANKA_1340100	R00703_c|R03104_c	NAD+ + (S)-Lactate <=> NADH + Pyruvate + H+|NAD+ + 3-Mercaptolactate <=> NADH + H+ + Mercaptopyruvate	1.1.1.27	Cysteine and methionine metabolism|Pyruvate metabolism
PBANKA_1346500	R07760_r	3-Hydroxyoctadecanoyl-CoA <=> H2O + (2E)-Octadecenoyl-CoA	4.2.1.134	Fatty acid metabolism / FAE
PBANKA_1346600	R03652_a|R03652_c	ATP + L-Glutamine + H+ + tRNA(Gln) <=> Diphosphate + AMP + Glutaminyl-tRNA	6.1.1.18	Aminoacyl-tRNA biosynthesis
PBANKA_1347700	R03656_c	ATP + H+ + L-Isoleucine + tRNA(Ile) <=> Diphosphate + AMP + L-Isoleucyl-tRNA(Ile)	6.1.1.5	Aminoacyl-tRNA biosynthesis
PBANKA_1350700	R03664_c	ATP + L-Tryptophan + H+ + tRNA(Trp) <=> Diphosphate + AMP + L-Tryptophanyl-tRNA(Trp)	6.1.1.2	Aminoacyl-tRNA biosynthesis
PBANKA_1351000	R05636_a	Pyruvate + H+ + D-Glyceraldehyde 3-phosphate <=> CO2 + 1-Deoxy-D-xylulose 5-phosphate	2.2.1.7	Isoprenoid metabolism
PBANKA_1354700	R05922_r	Dolichyl phosphate D-mannose + G00148 <=> Dolichyl phosphate + G00149	2.4.1.-	Glycosylphosphatidylinositol(GPI)-anchor biosynthesis
PBANKA_1355200	R01324_c|R01324_m|R01325_c|R01325_m|R01900_c|R01900_m	Citrate + [4Fe-4S] iron-sulfur cluster <=> H2O + cis-Aconitate + 2 Fe2+ + [2Fe-2S] iron-sulfur cluster|Citrate <=> H2O + cis-Aconitate|Citrate <=> Isocitrate|Isocitrate + [4Fe-4S] iron-sulfur cluster <=> H2O + cis-Aconitate + 2 Fe2+ + [2Fe-2S] iron-sulfur cluster|Isocitrate <=> H2O + cis-Aconitate	4.2.1.3	Citrate cycle (TCA cycle)
PBANKA_1356600	R00416_c	UTP + N-Acetyl-alpha-D-glucosamine 1-phosphate <=> Diphosphate + UDP-N-acetyl-D-glucosamine	2.7.7.23	Amino sugar and nucleotide sugar metabolism
PBANKA_1357500	R07767_a|R07768_a	2 S-Adenosyl-L-methionine + Octanoyl-[acp] + [4Fe-4S] iron-sulfur cluster <=> 2 L-Methionine + 2 5-Deoxyadenosine + Lipoyl-[acp] + [2Fe-2S] iron-sulfur cluster + 2 Fe2+|2 S-Adenosyl-L-methionine + Protein N6-(octanoyl)lysine + [4Fe-4S] iron-sulfur cluster <=> 2 L-Methionine + 2 5-Deoxyadenosine + Protein N6-(lipoyl)lysine + [2Fe-2S] iron-sulfur cluster + 2 Fe2+	2.8.1.8	Lipoic acid metabolism
PBANKA_1362000	R05578_c	ATP + L-Glutamate + H+ + tRNA(Glu) <=> Diphosphate + AMP + L-Glutamyl-tRNA(Glu)	6.1.1.17 6.1.1.24	Aminoacyl-tRNA biosynthesis
PBANKA_1362900	R03658_c	ATP + L-Lysine + tRNA(Lys) <=> Diphosphate + AMP + L-Lysyl-tRNA	6.1.1.6	Aminoacyl-tRNA biosynthesis
PBANKA_1364300	R00847_c|R00847_r	ATP + Glycerol <=> ADP + sn-Glycerol 3-phosphate	2.7.1.30	Glycerolipid metabolism
PBANKA_1410500	R01626_a	Malonyl-CoA + Acyl-carrier protein <=> CoA + Malonyl-[acyl-carrier protein]	2.3.1.39 2.3.1.85 2.3.1.86	Fatty acid metabolism / FASII
PBANKA_1411600	R03940_c	10-Formyltetrahydrofolate + L-Methionyl-tRNA <=> H+ + Tetrahydrofolate + N-Formylmethionyl-tRNA	2.1.2.9	Aminoacyl-tRNA biosynthesis
PBANKA_1413100	R07770_m|R07771_m	ATP + H+ + Lipoate <=> Diphosphate + Lipoyl-AMP|Lipoyl-AMP + Apoprotein <=> AMP + Protein N6-(lipoyl)lysine	2.7.7.63	Lipoic acid metabolism
PBANKA_1414100	R01802_c	myo-Inositol + CDP-diacylglycerol <=> CMP + 1-Phosphatidyl-D-myo-inositol	2.7.8.11	Inositol phosphate (vit B8) metabolism
PBANKA_1415100	R01890_c|R01890_r|R02590_c|R02590_r	CTP + Choline phosphate <=> CDP-choline + Diphosphate|CTP + Choline phosphate <=> Diphosphate + CDP-choline|CTP + H+ + N-Trimethyl-2-aminoethylphosphonate <=> Diphosphate + CMP-N-trimethyl-2-aminoethylphosphonate|H+ + CTP + N-Trimethyl-2-aminoethylphosphonate <=> CMP-N-trimethyl-2-aminoethylphosphonate + Diphosphate	2.7.7.15	Glycerophospholipid metabolism|Phosphonate and phosphinate metabolism
PBANKA_1428500	R00851_r|R09380_r	Acyl-CoA + sn-Glycerol 3-phosphate <=> CoA + 1-Acyl-sn-glycerol 3-phosphate|sn-Glycerol 3-phosphate + Acyl-[acyl-carrier protein] <=> Acyl-carrier protein + 1-Acyl-sn-glycerol 3-phosphate	2.3.1.15	Glycerolipid metabolism|Glycerophospholipid metabolism
PBANKA_1429600	R03661_c	ATP + H+ + L-Proline + tRNA(Pro) <=> Diphosphate + AMP + L-Prolyl-tRNA(Pro)	6.1.1.15	Aminoacyl-tRNA biosynthesis
PBANKA_1429900	R05923_r|R08107_r	Phosphatidylethanolamine + G00140 <=> 1,2-Diacyl-sn-glycerol + G00141|Phosphatidylethanolamine + G00149 <=> 1,2-Diacyl-sn-glycerol + Glycosylphosphatidylinositol (GPI)-anchor protein		Glycerophospholipid metabolism|Glycosylphosphatidylinositol(GPI)-anchor biosynthesis
PBANKA_1431700	R03662_a|R03662_c|R08218_c	ATP + L-Serine + tRNA(Sec) <=> Diphosphate + AMP + L-Seryl-tRNA(Sec)|ATP + L-Serine + tRNA(Ser) <=> Diphosphate + AMP + L-Seryl-tRNA(Ser)	6.1.1.11	Aminoacyl-tRNA biosynthesis
PBANKA_1434200	R03646_c	ATP + L-Arginine + H+ + tRNA(Arg) <=> Diphosphate + AMP + L-Arginyl-tRNA(Arg)	6.1.1.19	Aminoacyl-tRNA biosynthesis
PBANKA_1439500	R02480_m	Heme + Apocytochrome c <=> Cytochrome c	4.4.1.17	Heme biosynthesis
PBANKA_1440000	R03656_a	ATP + H+ + L-Isoleucine + tRNA(Ile) <=> Diphosphate + AMP + L-Isoleucyl-tRNA(Ile)	6.1.1.5	Aminoacyl-tRNA biosynthesis
PBANKA_1446700	R03660_a	ATP + L-Phenylalanine + H+ + tRNA(Phe) <=> Diphosphate + AMP + L-Phenylalanyl-tRNA(Phe)	6.1.1.20	Aminoacyl-tRNA biosynthesis
PBANKA_1446900	R01698_m|R01933_m|R03815_m|R07618_m|R08549_m	NAD+ + CoA + 2-Oxoadipate <=> NADH + CO2 + Glutaryl-CoA|NAD+ + CoA + 2-Oxoglutarate <=> NADH + CO2 + Succinyl-CoA|NAD+ + Dihydrolipoamide <=> NADH + H+ + Lipoamide|NAD+ + Dihydrolipoylprotein <=> NADH + H+ + Lipoylprotein|NAD+ + Enzyme N6-(dihydrolipoyl)lysine <=> NADH + H+ + Enzyme N6-(lipoyl)lysine	1.2.4.2 1.8.1.4 2.3.1.61|1.8.1.4	Citrate cycle (TCA cycle)|Glycine, serine and threonine metabolism|Lysine degradation
PBANKA_1450200	R00945_a|R00945_c|R00945_m|R09099_a|R09099_c|R09099_m	H2O + Glycine + 5,10-Methylenetetrahydrofolate <=> L-Serine + Tetrahydrofolate|L-Serine + 5,6,7,8-Tetrahydromethanopterin <=> H2O + Glycine + 5,10-Methylenetetrahydromethanopterin	2.1.2.1	Folate biosynthesis|Methane metabolism
PBANKA_1459200	R00830_m	Glycine + H+ + Succinyl-CoA <=> CoA + CO2 + 5-Aminolevulinate	2.3.1.37	Heme biosynthesis
PBANKA_1460300	R05921_r	Dolichyl phosphate D-mannose + G00147 <=> Dolichyl phosphate + G00148	2.4.1.-	Glycosylphosphatidylinositol(GPI)-anchor biosynthesis
PBANKA_1464200	R02094_c|R02098_c	ATP + dTMP <=> ADP + dTDP|ATP + dUMP <=> ADP + dUDP	2.7.4.4 2.7.4.9|2.7.4.9 2.7.4.12	Pyrimidine metabolism
PBANKA_1464700	R03664_a	ATP + L-Tryptophan + H+ + tRNA(Trp) <=> Diphosphate + AMP + L-Tryptophanyl-tRNA(Trp)	6.1.1.2	Aminoacyl-tRNA biosynthesis
PBANKA_0814300	R00104_c	ATP + NAD+ <=> NADP+ + ADP	2.7.1.23	Nicotinate and nicotinamide (vit B3) metabolism
PBANKA_1342800	R00137_c|R03005_c	ATP + Nicotinamide D-ribonucleotide <=> NAD+ + Diphosphate|ATP + Nicotinate D-ribonucleotide <=> Diphosphate + Deamino-NAD+	2.7.7.1 2.7.7.18	Nicotinate and nicotinamide (vit B3) metabolism
PBANKA_0829700	R00332_c|R00332_r|R02090_c	ATP + GMP <=> ADP + GDP|ATP + dGMP <=> ADP + dGDP	2.7.4.8|2.7.4.8 2.7.4.12	Purine metabolism
PBANKA_1308200	R02241_r|R09381_r	Acyl-[acyl-carrier protein] + 1-Acyl-sn-glycerol 3-phosphate <=> Acyl-carrier protein + Phosphatidate|CoA + Phosphatidate <=> Acyl-CoA + 1-Acyl-sn-glycerol 3-phosphate	2.3.1.51	Glycerolipid metabolism|Glycerophospholipid metabolism
PBANKA_0803200	R01187_c|R03394_c|R03430_c	H2O + 1D-myo-Inositol 1,3,4,5-tetrakisphosphate <=> Orthophosphate + H+ + 1D-myo-Inositol 1,3,4-trisphosphate|H2O + 1D-myo-Inositol 3-phosphate <=> Orthophosphate + H+ + myo-Inositol|H2O + D-myo-Inositol 1,4,5-trisphosphate <=> Orthophosphate + H+ + 1D-myo-Inositol 1,4-bisphosphate	3.1.3.25|3.1.3.56	Inositol phosphate (vit B8) metabolism
PBANKA_0206400	R05633_a	2-C-Methyl-D-erythritol 4-phosphate + CTP <=> Diphosphate + 4-(Cytidine 5-diphospho)-2-C-methyl-D-erythritol	2.7.7.60	Isoprenoid metabolism
PBANKA_0306400	R05637_a	2-Phospho-4-(cytidine 5-diphospho)-2-C-methyl-D-erythritol <=> 2-C-Methyl-D-erythritol 2,4-cyclodiphosphate + CMP	4.6.1.12	Isoprenoid metabolism
PBANKA_1230000	R05918_c	Palmitoyl-CoA + G00144 <=> CoA + G00145	2.3.-.-	Glycosylphosphatidylinositol(GPI)-anchor biosynthesis
PBANKA_1141200	FeSsyn1_m|FeSsyn2_m|R07459_r	ATP + C15810 <=> Diphosphate + C15813|H2O + ATP + FADH2 + 2 Fe2+ + 2 [Enzyme]-S-sulfanylcysteine + SufBCD scaffold complex <=> ADP + Orthophosphate + FAD + 7 H+ + 2 [Enzyme]-cysteine + SufBCD with bound [2Fe-2S] cluster|H2O + ATP + FADH2 + 2 Fe2+ + 2 [Enzyme]-S-sulfanylcysteine + SufBCD with bound [2Fe-2S] cluster <=> ADP + Orthophosphate + FAD + 7 H+ + 2 [Enzyme]-cysteine + SufBCD with two bound…	2.7.7.73	FeS cluster biosynthesis|Thiamine (vit B1) metabolism
PBANKA_0901600	R09844_c	trans,trans-Farnesyl diphosphate + Protein-cysteine <=> Diphosphate + S-Farnesyl protein	2.5.1.58	Terpenoid backbone biosynthesis
PBANKA_0602600	R02480_m	Heme + Apocytochrome c <=> Cytochrome c	4.4.1.17	Heme biosynthesis
PBANKA_1118100.2	R05916_c	UDP-N-acetyl-D-glucosamine + 1-Phosphatidyl-D-myo-inositol <=> UDP + G00143	2.4.1.198	Glycosylphosphatidylinositol(GPI)-anchor biosynthesis
PBANKA_0836100	R05916_c	UDP-N-acetyl-D-glucosamine + 1-Phosphatidyl-D-myo-inositol <=> UDP + G00143	2.4.1.198	Glycosylphosphatidylinositol(GPI)-anchor biosynthesis
putative_PBANKA_1129500	R01655_c	H2O + 5,10-Methenyltetrahydrofolate <=> H+ + 10-Formyltetrahydrofolate	3.5.4.9	Folate biosynthesis
putative_PBANKA_1035500	R00582_c	H2O + O-Phospho-L-serine <=> Orthophosphate + L-Serine + H+	3.1.3.3	Glycine, serine and threonine metabolism
putative_PBANKA_0802400	R03035_c	ATP + Pantetheine 4-phosphate <=> Diphosphate + Dephospho-CoA	2.7.7.3	Pantothenate (vit B5) metabolism / CoA biosynthesis
putative_PBANKA_1017700	R02161_m	1.5 H+ + Ubiquinol-8 + 2 Ferricytochrome c <=> 3.5 H+ + Ubiquinone-8 + 2 Ferrocytochrome c	1.10.2.2	ETC
putative_PBANKA_1210700	R02161_m	1.5 H+ + Ubiquinol-8 + 2 Ferricytochrome c <=> 3.5 H+ + Ubiquinone-8 + 2 Ferrocytochrome c	1.10.2.2	ETC
putative_PBANKA_1303300	R02161_m	1.5 H+ + Ubiquinol-8 + 2 Ferricytochrome c <=> 3.5 H+ + Ubiquinone-8 + 2 Ferrocytochrome c	1.10.2.2	ETC
putative_PBANKA_MIT01900	R02161_m	1.5 H+ + Ubiquinol-8 + 2 Ferricytochrome c <=> 3.5 H+ + Ubiquinone-8 + 2 Ferrocytochrome c	1.10.2.2	ETC
putative_PBANKA_0308800	Tc2rC00096_c|Tc2rC00325_c	GDP-L-fucose + GMP <=> GMP + GDP-L-fucose|GDP-mannose + GMP <=> GMP + GDP-mannose		Transport between c and r
putative_PBANKA_0304000	R02412_c|R02413_c|R03083_c|R03084_c|R03460_c	2-Dehydro-3-deoxy-D-arabino-heptonate 7-phosphate <=> Orthophosphate + H+ + 3-Dehydroquinate|3-Dehydroquinate <=> H2O + 3-Dehydroshikimate|ATP + Shikimate <=> ADP + Shikimate 3-phosphate|NADP+ + Shikimate <=> NADPH + H+ + 3-Dehydroshikimate|Phosphoenolpyruvate + Shikimate 3-phosphate <=> Orthophosphate + H+ + 5-O-(1-Carboxyvinyl)-3-phosphoshikimate	1.1.1.25 1.1.1.282|2.5.1.19|2.7.1.71|4.2.1.10|4.2.3.4	Shikimate pathway
putative_PBANKA_API00120	FeSsyn1_a|FeSsyn2_a	H2O + ATP + FADH2 + 2 Fe2+ + 2 [Enzyme]-S-sulfanylcysteine + SufBCD scaffold complex <=> ADP + Orthophosphate + 7 H+ + FAD + 2 [Enzyme]-cysteine + SufBCD with bound [2Fe-2S] cluster|H2O + ATP + FADH2 + 2 Fe2+ + 2 [Enzyme]-S-sulfanylcysteine + SufBCD with bound [2Fe-2S] cluster <=> ADP + Orthophosphate + 7 H+ + FAD + 2 [Enzyme]-cysteine + SufBCD with two bound [2Fe-2S] clusters		FeS cluster biosynthesis
putative_PBANKA_1122100	R01195_a|R01195_m|R05875_a	NAD+ + H+ + Reduced ferredoxin + [4Fe-4S] iron-sulfur cluster <=> NADH + Oxidized ferredoxin + [2Fe-2S] iron-sulfur cluster + 2 Fe2+|NADP+ + H+ + 2 Reduced ferredoxin + [4Fe-4S] iron-sulfur cluster <=> NADPH + 2 Oxidized ferredoxin + 2 Fe2+ + [2Fe-2S] iron-sulfur cluster|NADP+ + H+ + 2 Reduced ferredoxin + [4Fe-4S] iron-sulfur cluster <=> NADPH + 2 Oxidized ferredoxin + [2Fe-2S] iron-sulfur clust…	1.18.1.2|1.18.1.3	Redox metabolism
putative_PBANKA_1237400	FeStran1_a|FeStran2_a	4 H+ + SufBCD with bound [2Fe-2S] cluster <=> [2Fe-2S] iron-sulfur cluster + SufBCD scaffold complex|4 H+ + SufBCD with bound [4Fe-4S] cluster <=> [4Fe-4S] iron-sulfur cluster + SufBCD scaffold complex		FeS cluster biosynthesis
putative_PBANKA_1409500	R07460_m	L-Cysteine + [Enzyme]-cysteine <=> L-Alanine + [Enzyme]-S-sulfanylcysteine	2.8.1.7	Thiamine (vit B1) metabolism
putative_PBANKA_1029200	FeSsyn1_a|FeSsyn2_a	H2O + ATP + FADH2 + 2 Fe2+ + 2 [Enzyme]-S-sulfanylcysteine + SufBCD scaffold complex <=> ADP + Orthophosphate + 7 H+ + FAD + 2 [Enzyme]-cysteine + SufBCD with bound [2Fe-2S] cluster|H2O + ATP + FADH2 + 2 Fe2+ + 2 [Enzyme]-S-sulfanylcysteine + SufBCD with bound [2Fe-2S] cluster <=> ADP + Orthophosphate + 7 H+ + FAD + 2 [Enzyme]-cysteine + SufBCD with two bound [2Fe-2S] clusters		FeS cluster biosynthesis
putative_PBANKA_0303800	R07460_a	L-Cysteine + [Enzyme]-cysteine <=> L-Alanine + [Enzyme]-S-sulfanylcysteine		FeS cluster biosynthesis
putative_PBANKA_0943500	FeSsyn1_a|FeSsyn2_a	H2O + ATP + FADH2 + 2 Fe2+ + 2 [Enzyme]-S-sulfanylcysteine + SufBCD scaffold complex <=> ADP + Orthophosphate + 7 H+ + FAD + 2 [Enzyme]-cysteine + SufBCD with bound [2Fe-2S] cluster|H2O + ATP + FADH2 + 2 Fe2+ + 2 [Enzyme]-S-sulfanylcysteine + SufBCD with bound [2Fe-2S] cluster <=> ADP + Orthophosphate + 7 H+ + FAD + 2 [Enzyme]-cysteine + SufBCD with two bound [2Fe-2S] clusters		FeS cluster biosynthesis
putative_PBANKA_0303900	Tc2eC00831_c|Tc2eC00864_c|Tc2eC04079_c	N-((R)-Pantothenoyl)-L-cysteine <=> N-((R)-Pantothenoyl)-L-cysteine|Pantetheine <=> Pantetheine|Pantothenate <=> Pantothenate		Transport between c and e
putative_PBANKA_0511000	R01074_a	ATP + H+ + Biotin <=> Diphosphate + Biotinyl-5-AMP	6.2.1.11 6.3.4.9 6.3.4.10 6.3.4.11 6.3.4.15	Biotin metabolism
putative_PBANKA_0934300	Tc2rC00029_c	UDP-glucose + UMP <=> UMP + UDP-glucose		Transport between c and r
PBANKA_1127600	R02058_c	Acetyl-CoA + D-Glucosamine 6-phosphate <=> CoA + H+ + N-Acetyl-D-glucosamine 6-phosphate	2.3.1.4	Amino sugar and nucleotide sugar metabolism

## Sheet: S5.2
Essential gene in a human cell	Ensemble gene ID	Reactions (various IDs) associated to essential genes, as defined in metabolic model of human, ihuman	Reaction description (metabolite name)	Reaction E.C.
AAAS	ENSG00000094914	HMR_8639	DNA <=> DNA
AARS	ENSG00000090861	HMR_5131	alanine + ATP + tRNA(ala) -> AMP + L-alanyl-tRNA(ala) + PPi	EC:6.1.1.7
AASDHPPT	ENSG00000149313	HMR_4500	apo-[ACP] + CoA -> [ACP] + H+ + PAP	EC:2.7.8.-
ABCC1	ENSG00000103222	CE1447te|CE2006te|CE4877te|CE5025t|CE5026t|CE7085te|CE7090te|CE7096te|DIGALSGALSIDEATPte|DOPA3GLCURt|DOPA4GLCURt|FOLABCCte|HMR_1... <Preview truncated at 128 characters>	(18R)-HEPE + ATP + H2O -> ADP + H+ + Pi + (18R)-HEPE|11-dehydro-thromboxane B2 + ATP + H2O -> ADP + H+ + Pi + 11-dehydro-thrombo... <Preview truncated at 128 characters>	TCDB:3.A.1.201.2; TCDB:3.A.1.208.8|TCDB:3.A.1.208.2|TCDB:3.A.1.208.2; TCDB:3.A.1.208.9; TCDB:3.A.1.208.7|TCDB:3.A.1.208.8
ABL1	ENSG00000097007	HMR_7617	[protein]-L-tyrosine + ATP -> [protein]-tyrosine-phosphate + ADP + H+	EC:2.7.10.1; EC:2.7.10.2; EC:2.7.12.1; EC:2.7.12.2
ACAD9	ENSG00000177646	HMR_3107|HMR_3111|HMR_3115|HMR_3121|HMR_3128|HMR_3135|HMR_3142|HMR_3149|HMR_3163|HMR_3170|HMR_3174|HMR_3178|HMR_3182|HMR_3186|HM... <Preview truncated at 128 characters>	(11Z)-docosenoyl-CoA + 10 CoA + 9 FAD + 10 H2O + 10 NAD+ -> 11 acetyl-CoA + 9 FADH2 + 10 H+ + 10 NADH|(11Z)-eicosenoyl-CoA + FAD... <Preview truncated at 128 characters>	EC:1.3.8.7; EC:1.3.8.8; EC:1.3.8.9; EC:1.3.99.-;|EC:1.3.8.7; EC:1.3.99.-|EC:1.3.99.3|EC:2.7.4.11; EC:2.7.4.3|EC:4.2.1.17; EC:1.1.1.35; EC:1.1.1.211; EC:1.3.8.7; EC:1.3.8.8; EC:1.3.8.9; EC:2.3.1.16
ACLY	ENSG00000131473	HMR_4149	ATP + citrate + CoA -> acetyl-CoA + ADP + OAA + Pi	EC:2.3.3.8
ACO2	ENSG00000100412	HMR_4456|HMR_4458|HMR_4589	cis-aconitate + H2O <=> citrate|cis-aconitate + H2O <=> isocitrate|citrate <=> isocitrate	EC:4.2.1.3
ACSL1	ENSG00000151726	FACOAL1813|HMR_0027|HMR_0030|HMR_0188|HMR_0192|HMR_0196|HMR_0200|HMR_0204|HMR_0209|HMR_0213|HMR_0217|HMR_0226|HMR_0233|HMR_0237|... <Preview truncated at 128 characters>	(10Z)-heptadecenoic acid + ATP + CoA <=> (10Z)-heptadecenoyl-CoA + AMP + PPi|(11Z)-docosenoyl-CoA + AMP + PPi <=> ATP + cis-ceto... <Preview truncated at 128 characters>	EC:6.2.1.3
ADSL	ENSG00000239900	HMR_4412|HMR_4812	AICAR + fumarate <=> SAICAR|AMP + fumarate <=> adenylosuccinate	EC:4.3.2.2
ADSS	ENSG00000035687	HMR_4042	aspartate + GTP + IMP -> adenylosuccinate + GDP + 2 H+ + Pi	EC:6.3.4.4
AGMAT	ENSG00000116771	HMR_4424	agmatine + H2O -> putrescine + urea	EC:3.5.3.11
AGPAT1	ENSG00000204310	AGPAT1|HMR_0580|HMR_0588|HMR_0589|HMR_0590|HMR_0591|HMR_0592|HMR_0593|HMR_0594	1-acylglycerol-3P pool + acyl-CoA pool -> CoA + phosphatidate-CL pool|1-acylglycerol-3P pool + acyl-CoA pool -> CoA + phosphatid... <Preview truncated at 128 characters>	2.3.1.51|EC:2.3.1.51
AGPAT5	ENSG00000155189	AGPAT1|HMR_0580|HMR_0588|HMR_0589|HMR_0590|HMR_0591|HMR_0592|HMR_0593|HMR_0594	1-acylglycerol-3P pool + acyl-CoA pool -> CoA + phosphatidate-CL pool|1-acylglycerol-3P pool + acyl-CoA pool -> CoA + phosphatid... <Preview truncated at 128 characters>	2.3.1.51|EC:2.3.1.51
AGPS	ENSG00000018510	AGPSx|HMR_7594	acylglycerone-phosphate + Hydroxy Alkyl Chain -> alkyl-glycerone-3-phosphate + H+ + R Total|acylglycerone-phosphate + Hydroxy Al... <Preview truncated at 128 characters>	2.5.1.26|EC:2.5.1.26
AHCTF1	ENSG00000153207	HMR_8639	DNA <=> DNA
AHCY	ENSG00000101444	HMR_3877|HMR_7136	H2O + SAH -> adenosine + homocysteine|H2O + se-adenosyl-L-selenohomocysteine <=> adenosine + selenohomocysteine	EC:3.3.1.1
AHCYL1	ENSG00000168710	HMR_3877|HMR_7136	H2O + SAH -> adenosine + homocysteine|H2O + se-adenosyl-L-selenohomocysteine <=> adenosine + selenohomocysteine	EC:3.3.1.1
AK2	ENSG00000004455	HMR_4002|HMR_4004|HMR_4480	2 ADP <=> AMP + ATP|ADP + dADP <=> ATP + dAMP	EC:2.7.4.11; EC:2.7.4.3|EC:2.7.4.3
AK6	ENSG00000085231	HMR_4002|HMR_4004|HMR_4480	2 ADP <=> AMP + ATP|ADP + dADP <=> ATP + dAMP	EC:2.7.4.11; EC:2.7.4.3|EC:2.7.4.3
AKT2	ENSG00000105221	HMR_9577|HMR_9579	ATP + protamine -> ADP + O-phosphoprotamine|[protein] + ATP -> ADP + phosphoprotein	EC:2.7.11.1|EC:2.7.11.1; EC:2.7.11.8; EC:2.7.11.9; EC:2.7.11.10; EC:2.7.11.11; EC:2.7.11.12; EC:2.7.11.13; EC:2.7.11.17; EC:2.7.11.21; EC:2.7.11.22; EC:2.7.11.24; EC:2.7.11.25; EC:2.7.11.30; EC:2.7.12.1; EC:2.7.12.2
ALAD	ENSG00000148218	HMR_4744	2 5-aminolevulinate -> H+ + 2 H2O + porphobilinogen	EC:4.2.1.24
ALAS1	ENSG00000023330	HMR_0027|HMR_3939|HMR_4657|HMR_4742	2-amino-3-oxoadipate + CoA <=> glycine + succinyl-CoA|2-amino-3-oxoadipate + H+ -> 5-aminolevulinate + CO2|activation-ppara -> a... <Preview truncated at 128 characters>	EC:2.3.1.37
ALDH18A1	ENSG00000059573	HMR_3895|HMR_3897|HMR_9557|LCADi_Dm	ATP + glutamate -> ADP + glutamyl-5-phosphate|H+ + N-acetyl-L-glutamate-5-phosphate + NADPH -> N-acetyl-L-glutamate 5-semialdehy... <Preview truncated at 128 characters>	1.2.1.3|EC:1.2.1.41|EC:2.7.2.11
ALDOA	ENSG00000149925	HMR_4355|HMR_4356|HMR_4375|HMR_8762|HMR_8773	D-tagatose-6-phosphate <=> DHAP + glyceraldehyde|D-xylulose-1-phosphate <=> DHAP + glycolaldehyde|DHAP + GAP <=> fructose-1,6-bi... <Preview truncated at 128 characters>	EC:4.1.2.13
ALG1	ENSG00000033011	HMR_7266	GDP-mannose + N,N-chitobiosyldiphosphodolichol -> beta-D-mannosyldiacetylchitobiosyldiphosphodolichol + GDP + H+	EC:2.4.1.142
ALG11	ENSG00000253710	HMR_7269|HMR_7270	G00005 + GDP-mannose -> G10526 + GDP + H+|G10526 + GDP-mannose -> G00006 + GDP + H+	EC:2.4.1.131
ALG14	ENSG00000172339	HMR_7265	N-acetyl-D-glucosaminyldiphosphodolichol + UDP-N-acetylglucosamine -> H+ + N,N-chitobiosyldiphosphodolichol + UDP	EC:2.4.1.141
ALG2	ENSG00000119523	HMR_7267|HMR_7268	alpha-D-mannosyl-beta-D-mannosyl-diacetylchitobiosyldiphosphodolichol + GDP-mannose -> G00005 + GDP + H+|beta-D-mannosyldiacetyl... <Preview truncated at 128 characters>	EC:2.4.1.132|EC:2.4.1.257
ALG5	ENSG00000120697	HMR_7278|HMR_8727|UDPDOLPT_L	H2O + UDP-glucuronate -> D-glucuronate 1-phosphate + 2 H+ + UMP|dolichyl-phosphate + UDP-glucose -> UDP + dolichyl-D-glucosyl-ph... <Preview truncated at 128 characters>	2.4.1.117|EC:2.4.1.117
ALG6	ENSG00000088035	HMR_7279	dolichyl-D-glucosyl-phosphate + G00007 -> dolichyl-phosphate + G10598 + H+	EC:2.4.1.267
ALG9	ENSG00000086848	HMR_7275|HMR_7277	dolichyl-phosphate-D-mannose + G10595 -> dolichyl-phosphate + G10596 + H+|dolichyl-phosphate-D-mannose + G10597 -> dolichyl-phos... <Preview truncated at 128 characters>	EC:2.4.1.259|EC:2.4.1.261
AMD1	ENSG00000123505	HMR_4073	H+ + SAM -> CO2 + S-adenosylmethioninamine	EC:4.1.1.50
AMHR2	ENSG00000135409	HMR_9577	[protein] + ATP -> ADP + phosphoprotein	EC:2.7.11.1; EC:2.7.11.8; EC:2.7.11.9; EC:2.7.11.10; EC:2.7.11.11; EC:2.7.11.12; EC:2.7.11.13; EC:2.7.11.17; EC:2.7.11.21; EC:2.7.11.22; EC:2.7.11.24; EC:2.7.11.25; EC:2.7.11.30; EC:2.7.12.1; EC:2.7.12.2
AMY1A	ENSG00000237763	AMY2e|HMR_8568|HMR_8569|HMR_8570|HMR_8571|HMR_8572|HMR_8573|HMR_8574|HMR_8575|HMR_8576|HMR_8577|HMR_8578|HMR_8579|HMR_8580|HMR_8... <Preview truncated at 128 characters>	2 H2O + maltononaose -> 2 fructose + maltoheptaose|2 H2O + maltononaose -> 2 glucose + maltoheptaose|8 H2O + glycogenin G4G7 -> ... <Preview truncated at 128 characters>	3.2.1.1|EC:3.2.1.1
AMY1B	ENSG00000174876	AMY2e|HMR_8568|HMR_8569|HMR_8570|HMR_8571|HMR_8572|HMR_8573|HMR_8574|HMR_8575|HMR_8576|HMR_8577|HMR_8578|HMR_8579|HMR_8580|HMR_8... <Preview truncated at 128 characters>	2 H2O + maltononaose -> 2 fructose + maltoheptaose|2 H2O + maltononaose -> 2 glucose + maltoheptaose|8 H2O + glycogenin G4G7 -> ... <Preview truncated at 128 characters>	3.2.1.1|EC:3.2.1.1
AMY1C	ENSG00000187733	AMY2e|HMR_8568|HMR_8569|HMR_8570|HMR_8571|HMR_8572|HMR_8573|HMR_8574|HMR_8575|HMR_8576|HMR_8577|HMR_8578|HMR_8579|HMR_8580|HMR_8... <Preview truncated at 128 characters>	2 H2O + maltononaose -> 2 fructose + maltoheptaose|2 H2O + maltononaose -> 2 glucose + maltoheptaose|8 H2O + glycogenin G4G7 -> ... <Preview truncated at 128 characters>	3.2.1.1|EC:3.2.1.1
ANAPC11	ENSG00000141552	RE0583N	H+ + NADPH + (2E)-octadecenoyl-CoA <=> NADP+ + stearoyl-CoA	2.7.4.6
APRT	ENSG00000198931	HMR_4085|HMR_4086	AMP + PPi <=> adenine + PRPP	EC:2.4.2.7
ARCN1	ENSG00000095139	HMR_4312|HMR_4313|HMR_4314|HMR_6578	ATP <=> ATP|D-glucitol <=> D-glucitol
ARID4B	ENSG00000054267	HMR_5337	GSH + urocanate <=> S-[2-carboxy-1-(1H-imidazol-4-yl)ethyl]glutathione	EC:2.5.1.-
ATIC	ENSG00000138363	HMR_4038|HMR_4814	10-formyl-THF + AICAR <=> FAICAR + THF|FAICAR <=> H2O + IMP	EC:2.1.2.3|EC:3.5.4.10
ATP1A1	ENSG00000163399	HMR_5295|HMR_5429	ATP + H2O + 2 K+ + 3 Na+ -> ADP + H+ + 2 K+ + 3 Na+ + Pi|ATP + H2O + K+ + Na+ -> ADP + H+ + K+ + Na+ + Pi	EC:3.6.3.9|TCDB:3.A.3.1.1
ATP1B3	ENSG00000069849	HMR_5295|HMR_5429	ATP + H2O + 2 K+ + 3 Na+ -> ADP + H+ + 2 K+ + 3 Na+ + Pi|ATP + H2O + K+ + Na+ -> ADP + H+ + K+ + Na+ + Pi	EC:3.6.3.9|TCDB:3.A.3.1.1
ATP2A2	ENSG00000174437	HMR_7629	ATP + 2 Ca2+ + H2O -> ADP + 2 Ca2+ + H+ + Pi	EC:3.6.3.8
ATP2C2	ENSG00000064270	HMR_7629	ATP + 2 Ca2+ + H2O -> ADP + 2 Ca2+ + H+ + Pi	EC:3.6.3.8
ATP6AP1	ENSG00000071553	HMR_7799	ATP + 3 H+ + H2O -> ADP + 4 H+ + Pi
ATP6V0A2	ENSG00000185344	ATPasel|HMR_7799	ATP + 3 H+ + H2O -> ADP + 4 H+ + Pi|ATP + H2O -> ADP + H+ + Pi	3.6.3.14
ATP6V0B	ENSG00000117410	ATPasel|HMR_7799	ATP + 3 H+ + H2O -> ADP + 4 H+ + Pi|ATP + H2O -> ADP + H+ + Pi	3.6.3.14
ATP6V0C	ENSG00000185883	ATPasel|HMR_7799	ATP + 3 H+ + H2O -> ADP + 4 H+ + Pi|ATP + H2O -> ADP + H+ + Pi	3.6.3.14
ATP6V0D1	ENSG00000159720	ATPasel|HMR_7799	ATP + 3 H+ + H2O -> ADP + 4 H+ + Pi|ATP + H2O -> ADP + H+ + Pi	3.6.3.14
ATP6V1A	ENSG00000114573	ATPasel	ATP + H2O -> ADP + H+ + Pi	3.6.3.14
ATP6V1B2	ENSG00000147416	ATPasel	ATP + H2O -> ADP + H+ + Pi	3.6.3.14
ATP6V1C1	ENSG00000155097	ATPasel	ATP + H2O -> ADP + H+ + Pi	3.6.3.14
ATP6V1D	ENSG00000100554	ATPasel	ATP + H2O -> ADP + H+ + Pi	3.6.3.14
ATP6V1E1	ENSG00000131100	ATPasel	ATP + H2O -> ADP + H+ + Pi	3.6.3.14
ATP6V1F	ENSG00000128524	ATPasel	ATP + H2O -> ADP + H+ + Pi	3.6.3.14
ATP6V1G1	ENSG00000136888	ATPasel	ATP + H2O -> ADP + H+ + Pi	3.6.3.14
ATP6V1H	ENSG00000047249	ATPasel|HMR_7799	ATP + 3 H+ + H2O -> ADP + 4 H+ + Pi|ATP + H2O -> ADP + H+ + Pi	3.6.3.14
ATR	ENSG00000175054	HMR_9577|HMR_9579	ATP + protamine -> ADP + O-phosphoprotamine|[protein] + ATP -> ADP + phosphoprotein	EC:2.7.11.1|EC:2.7.11.1; EC:2.7.11.8; EC:2.7.11.9; EC:2.7.11.10; EC:2.7.11.11; EC:2.7.11.12; EC:2.7.11.13; EC:2.7.11.17; EC:2.7.11.21; EC:2.7.11.22; EC:2.7.11.24; EC:2.7.11.25; EC:2.7.11.30; EC:2.7.12.1; EC:2.7.12.2
ATRIP	ENSG00000164053	HMR_7163|HMR_7164	DNA + H2O -> 0.3 dAMP + 0.2 dCMP + 0.2 dGMP + 0.3 dTMP + H+|H2O + RNA -> 0.18 AMP + 0.3 CMP + 0.34 GMP + H+ + 0.18 UMP	EC:3.1.11.2
AURKA	ENSG00000087586	HMR_9577|HMR_9579	ATP + protamine -> ADP + O-phosphoprotamine|[protein] + ATP -> ADP + phosphoprotein	EC:2.7.11.1|EC:2.7.11.1; EC:2.7.11.8; EC:2.7.11.9; EC:2.7.11.10; EC:2.7.11.11; EC:2.7.11.12; EC:2.7.11.13; EC:2.7.11.17; EC:2.7.11.21; EC:2.7.11.22; EC:2.7.11.24; EC:2.7.11.25; EC:2.7.11.30; EC:2.7.12.1; EC:2.7.12.2
AURKB	ENSG00000178999	HMR_9577|HMR_9579	ATP + protamine -> ADP + O-phosphoprotamine|[protein] + ATP -> ADP + phosphoprotein	EC:2.7.11.1|EC:2.7.11.1; EC:2.7.11.8; EC:2.7.11.9; EC:2.7.11.10; EC:2.7.11.11; EC:2.7.11.12; EC:2.7.11.13; EC:2.7.11.17; EC:2.7.11.21; EC:2.7.11.22; EC:2.7.11.24; EC:2.7.11.25; EC:2.7.11.30; EC:2.7.12.1; EC:2.7.12.2
B3GALT6	ENSG00000176022	HMR_7203	Gal-Xyl-L-Ser-[protein] + UDP-galactose -> Gal2-Xyl-L-Ser-[protein] + H+ + UDP	EC:2.4.1.134
B3GNT2	ENSG00000170340	HMR_0765|HMR_0889|HMR_0891|HMR_0924|HMR_0925|HMR_0926|HMR_7336|HMR_7338|HMR_7341|HMR_7344|HMR_7347|HMR_7350|HMR_7353|HMR_7356|HM... <Preview truncated at 128 characters>	D-galactosyl-N-acylsphingosine + UDP-galactose -> digalactosylceramide + H+ + UDP|glucosylceramide pool + UDP-galactose -> H+ + ... <Preview truncated at 128 characters>	EC:2.4.1.-|EC:2.4.1.149; EC:2.4.1.-
BCR	ENSG00000186716	HMR_9577|HMR_9579	ATP + protamine -> ADP + O-phosphoprotamine|[protein] + ATP -> ADP + phosphoprotein	EC:2.7.11.1|EC:2.7.11.1; EC:2.7.11.8; EC:2.7.11.9; EC:2.7.11.10; EC:2.7.11.11; EC:2.7.11.12; EC:2.7.11.13; EC:2.7.11.17; EC:2.7.11.21; EC:2.7.11.22; EC:2.7.11.24; EC:2.7.11.25; EC:2.7.11.30; EC:2.7.12.1; EC:2.7.12.2
BIRC6	ENSG00000115760	HMR_9491	[protein]-L-lysine + ATP + ubiquitin -> [protein]-N-ubiquityllysine + AMP + PPi	EC:6.3.2.19
BRAF	ENSG00000157764	HMR_9577|HMR_9579	ATP + protamine -> ADP + O-phosphoprotamine|[protein] + ATP -> ADP + phosphoprotein	EC:2.7.11.1|EC:2.7.11.1; EC:2.7.11.8; EC:2.7.11.9; EC:2.7.11.10; EC:2.7.11.11; EC:2.7.11.12; EC:2.7.11.13; EC:2.7.11.17; EC:2.7.11.21; EC:2.7.11.22; EC:2.7.11.24; EC:2.7.11.25; EC:2.7.11.30; EC:2.7.12.1; EC:2.7.12.2
BRPF1	ENSG00000156983	HMR_9505	ADP + alpha tubulin + H+ + Pi <=> ATP + detyrosinated alpha-tubulin + tyrosine	EC:6.3.2.25
BUB1B	ENSG00000156970	HMR_9577|HMR_9579	ATP + protamine -> ADP + O-phosphoprotamine|[protein] + ATP -> ADP + phosphoprotein	EC:2.7.11.1|EC:2.7.11.1; EC:2.7.11.8; EC:2.7.11.9; EC:2.7.11.10; EC:2.7.11.11; EC:2.7.11.12; EC:2.7.11.13; EC:2.7.11.17; EC:2.7.11.21; EC:2.7.11.22; EC:2.7.11.24; EC:2.7.11.25; EC:2.7.11.30; EC:2.7.12.1; EC:2.7.12.2
CAD	ENSG00000084774	HMR_4034|HMR_4050|HMR_4608	(S)-dihydroorotate + H2O <=> H+ + N-carbamoyl-L-aspartate|2 ATP + glutamine + H2O + HCO3- -> 2 ADP + carbamoyl-phosphate + gluta... <Preview truncated at 128 characters>	EC:2.1.3.2|EC:3.5.2.3|EC:6.3.5.5
CAMK2G	ENSG00000148660	HMR_9577	[protein] + ATP -> ADP + phosphoprotein	EC:2.7.11.1; EC:2.7.11.8; EC:2.7.11.9; EC:2.7.11.10; EC:2.7.11.11; EC:2.7.11.12; EC:2.7.11.13; EC:2.7.11.17; EC:2.7.11.21; EC:2.7.11.22; EC:2.7.11.24; EC:2.7.11.25; EC:2.7.11.30; EC:2.7.12.1; EC:2.7.12.2
CARNS1	ENSG00000172508	HMR_4425|HMR_4606	4-aminobutyrate + ATP + histidine -> AMP + 2 H+ + homocarnosine + PPi|ATP + beta-alanine + histidine -> AMP + carnosine + H+ + P... <Preview truncated at 128 characters>	EC:6.3.2.11
CARS	ENSG00000110619	HMR_5135	ATP + cysteine + tRNA(cys) -> AMP + L-cysteinyl-tRNA(cys) + PPi	EC:6.1.1.16
CBLL1	ENSG00000105879	HMR_9491	[protein]-L-lysine + ATP + ubiquitin -> [protein]-N-ubiquityllysine + AMP + PPi	EC:6.3.2.19
CDC42BPG	ENSG00000171219	HMR_9577|HMR_9579	ATP + protamine -> ADP + O-phosphoprotamine|[protein] + ATP -> ADP + phosphoprotein	EC:2.7.11.1|EC:2.7.11.1; EC:2.7.11.8; EC:2.7.11.9; EC:2.7.11.10; EC:2.7.11.11; EC:2.7.11.12; EC:2.7.11.13; EC:2.7.11.17; EC:2.7.11.21; EC:2.7.11.22; EC:2.7.11.24; EC:2.7.11.25; EC:2.7.11.30; EC:2.7.12.1; EC:2.7.12.2
CDC7	ENSG00000097046	HMR_9577|HMR_9579	ATP + protamine -> ADP + O-phosphoprotamine|[protein] + ATP -> ADP + phosphoprotein	EC:2.7.11.1|EC:2.7.11.1; EC:2.7.11.8; EC:2.7.11.9; EC:2.7.11.10; EC:2.7.11.11; EC:2.7.11.12; EC:2.7.11.13; EC:2.7.11.17; EC:2.7.11.21; EC:2.7.11.22; EC:2.7.11.24; EC:2.7.11.25; EC:2.7.11.30; EC:2.7.12.1; EC:2.7.12.2
CDIPT	ENSG00000103502	HMR_0610|HMR_0613	CDP-diacylglycerol-LD-PI pool + inositol -> CMP + H+ + PI pool	EC:2.7.8.11
CDK1	ENSG00000170312	HMR_9577	[protein] + ATP -> ADP + phosphoprotein	EC:2.7.11.1; EC:2.7.11.8; EC:2.7.11.9; EC:2.7.11.10; EC:2.7.11.11; EC:2.7.11.12; EC:2.7.11.13; EC:2.7.11.17; EC:2.7.11.21; EC:2.7.11.22; EC:2.7.11.24; EC:2.7.11.25; EC:2.7.11.30; EC:2.7.12.1; EC:2.7.12.2
CDK12	ENSG00000167258	HMR_9577	[protein] + ATP -> ADP + phosphoprotein	EC:2.7.11.1; EC:2.7.11.8; EC:2.7.11.9; EC:2.7.11.10; EC:2.7.11.11; EC:2.7.11.12; EC:2.7.11.13; EC:2.7.11.17; EC:2.7.11.21; EC:2.7.11.22; EC:2.7.11.24; EC:2.7.11.25; EC:2.7.11.30; EC:2.7.12.1; EC:2.7.12.2
CDK13	ENSG00000065883	HMR_9577	[protein] + ATP -> ADP + phosphoprotein	EC:2.7.11.1; EC:2.7.11.8; EC:2.7.11.9; EC:2.7.11.10; EC:2.7.11.11; EC:2.7.11.12; EC:2.7.11.13; EC:2.7.11.17; EC:2.7.11.21; EC:2.7.11.22; EC:2.7.11.24; EC:2.7.11.25; EC:2.7.11.30; EC:2.7.12.1; EC:2.7.12.2
CDK2	ENSG00000123374	HMR_9577	[protein] + ATP -> ADP + phosphoprotein	EC:2.7.11.1; EC:2.7.11.8; EC:2.7.11.9; EC:2.7.11.10; EC:2.7.11.11; EC:2.7.11.12; EC:2.7.11.13; EC:2.7.11.17; EC:2.7.11.21; EC:2.7.11.22; EC:2.7.11.24; EC:2.7.11.25; EC:2.7.11.30; EC:2.7.12.1; EC:2.7.12.2
CDK4	ENSG00000135446	HMR_9577	[protein] + ATP -> ADP + phosphoprotein	EC:2.7.11.1; EC:2.7.11.8; EC:2.7.11.9; EC:2.7.11.10; EC:2.7.11.11; EC:2.7.11.12; EC:2.7.11.13; EC:2.7.11.17; EC:2.7.11.21; EC:2.7.11.22; EC:2.7.11.24; EC:2.7.11.25; EC:2.7.11.30; EC:2.7.12.1; EC:2.7.12.2
CDK6	ENSG00000105810	HMR_9577	[protein] + ATP -> ADP + phosphoprotein	EC:2.7.11.1; EC:2.7.11.8; EC:2.7.11.9; EC:2.7.11.10; EC:2.7.11.11; EC:2.7.11.12; EC:2.7.11.13; EC:2.7.11.17; EC:2.7.11.21; EC:2.7.11.22; EC:2.7.11.24; EC:2.7.11.25; EC:2.7.11.30; EC:2.7.12.1; EC:2.7.12.2
CDK7	ENSG00000134058	HMR_9577	[protein] + ATP -> ADP + phosphoprotein	EC:2.7.11.1; EC:2.7.11.8; EC:2.7.11.9; EC:2.7.11.10; EC:2.7.11.11; EC:2.7.11.12; EC:2.7.11.13; EC:2.7.11.17; EC:2.7.11.21; EC:2.7.11.22; EC:2.7.11.24; EC:2.7.11.25; EC:2.7.11.30; EC:2.7.12.1; EC:2.7.12.2
CDK8	ENSG00000132964	HMR_9577	[protein] + ATP -> ADP + phosphoprotein	EC:2.7.11.1; EC:2.7.11.8; EC:2.7.11.9; EC:2.7.11.10; EC:2.7.11.11; EC:2.7.11.12; EC:2.7.11.13; EC:2.7.11.17; EC:2.7.11.21; EC:2.7.11.22; EC:2.7.11.24; EC:2.7.11.25; EC:2.7.11.30; EC:2.7.12.1; EC:2.7.12.2
CDK9	ENSG00000136807	HMR_9577	[protein] + ATP -> ADP + phosphoprotein	EC:2.7.11.1; EC:2.7.11.8; EC:2.7.11.9; EC:2.7.11.10; EC:2.7.11.11; EC:2.7.11.12; EC:2.7.11.13; EC:2.7.11.17; EC:2.7.11.21; EC:2.7.11.22; EC:2.7.11.24; EC:2.7.11.25; EC:2.7.11.30; EC:2.7.12.1; EC:2.7.12.2
CDS2	ENSG00000101290	CDS|CDSm|HMR_0581|HMR_0607	CDP-diacylglycerol-LD-PI pool + PPi <=> CTP + H+ + phosphatidate-LD-PI pool|CTP + H+ + phosphatidate-CL pool -> CDP-diacylglycer... <Preview truncated at 128 characters>	2.7.7.41|EC:2.7.7.41
CEPT1	ENSG00000134255	HMR_0468|HMR_0614|HMR_0615|HMR_0625|HMR_7599|HMR_7600|HMR_7604|HMR_7610|RE3267N|RE3267R	1,2-diacylglycerol-LD-PC pool + CDP-choline -> CMP + H+ + PC-LD pool|1,2-diacylglycerol-LD-PE pool + CDP-ethanolamine -> CMP + H... <Preview truncated at 128 characters>	2.7.8.2|EC:2.7.8.1|EC:2.7.8.2
CHEK1	ENSG00000149554	HMR_9577|HMR_9579	ATP + protamine -> ADP + O-phosphoprotamine|[protein] + ATP -> ADP + phosphoprotein	EC:2.7.11.1|EC:2.7.11.1; EC:2.7.11.8; EC:2.7.11.9; EC:2.7.11.10; EC:2.7.11.11; EC:2.7.11.12; EC:2.7.11.13; EC:2.7.11.17; EC:2.7.11.21; EC:2.7.11.22; EC:2.7.11.24; EC:2.7.11.25; EC:2.7.11.30; EC:2.7.12.1; EC:2.7.12.2
CHKA	ENSG00000110721	HMR_0636|HMR_0648	ATP + choline -> ADP + H+ + phosphocholine|ATP + ethanolamine -> ADP + ethanolamine-phosphate + H+	EC:2.7.1.32|EC:2.7.1.82
CHUK	ENSG00000213341	HMR_9577	[protein] + ATP -> ADP + phosphoprotein	EC:2.7.11.1; EC:2.7.11.8; EC:2.7.11.9; EC:2.7.11.10; EC:2.7.11.11; EC:2.7.11.12; EC:2.7.11.13; EC:2.7.11.17; EC:2.7.11.21; EC:2.7.11.22; EC:2.7.11.24; EC:2.7.11.25; EC:2.7.11.30; EC:2.7.12.1; EC:2.7.12.2
CINP	ENSG00000100865	RE0572N	H+ + NADPH + (2E)-docosenoyl-CoA <=> NADP+ + docosanoyl-CoA
CLK3	ENSG00000179335	HMR_7617|HMR_9577	[protein] + ATP -> ADP + phosphoprotein|[protein]-L-tyrosine + ATP -> [protein]-tyrosine-phosphate + ADP + H+	EC:2.7.10.1; EC:2.7.10.2; EC:2.7.12.1; EC:2.7.12.2|EC:2.7.11.1; EC:2.7.11.8; EC:2.7.11.9; EC:2.7.11.10; EC:2.7.11.11; EC:2.7.11.12; EC:2.7.11.13; EC:2.7.11.17; EC:2.7.11.21; EC:2.7.11.22; EC:2.7.11.24; EC:2.7.11.25; EC:2.7.11.30; EC:2.7.12.1; EC:2.7.12.2
CMTR1	ENSG00000137200	HMR_9510	H+ + m7G(5)pppRm-RNA (mRNA containing a 2-O-methylpurine cap) + SAH <=> m7G(5)pppR-RNA + SAM	EC:2.1.1.57
CMTR2	ENSG00000180917	HMR_6710|HMR_6737	beta-carboline + SAM -> H+ + harman + SAH|salsolinol + SAM -> (R)-1,2-dimethyl-5,6-dihydroxy-tetrahydroisoquinoline + H+ + SAH	EC:2.1.1.-
COASY	ENSG00000068120	HMR_3871|HMR_4058|HMR_4727|HMR_4734	ATP + H+ + phosphopantetheine -> dephospho-CoA + PPi|ATP + H+ + phosphopantetheine <=> dephospho-CoA + PPi|ATP + dephospho-CoA -... <Preview truncated at 128 characters>	EC:2.7.1.24|EC:2.7.7.3
COMT	ENSG00000093010	HMR_2044|HMR_2045|HMR_2048|HMR_2052|HMR_2058|HMR_2059|HMR_2060|HMR_4563|HMR_6715|HMR_6730|HMR_6735|HMR_6736|HMR_6739|HMR_6746|HM... <Preview truncated at 128 characters>	2-hydroxy-3-methoxy-17beta-estradiol + H+ + SAH <=> 2-hydroxyestradiol-17beta + SAM|2-hydroxy-3-methoxyestrone + H+ + SAH <=> 2-... <Preview truncated at 128 characters>	EC:2.1.1.49; EC:2.1.1.6|EC:2.1.1.6
COPA	ENSG00000122218	HMR_4312|HMR_4313|HMR_4314|HMR_6578	ATP <=> ATP|D-glucitol <=> D-glucitol
COPB1	ENSG00000129083	HMR_4312|HMR_4313|HMR_4314|HMR_6578	ATP <=> ATP|D-glucitol <=> D-glucitol
COPB2	ENSG00000184432	HMR_4312|HMR_4313|HMR_4314|HMR_6578	ATP <=> ATP|D-glucitol <=> D-glucitol
COPE	ENSG00000105669	HMR_4312|HMR_4313|HMR_4314|HMR_6578	ATP <=> ATP|D-glucitol <=> D-glucitol
COPG1	ENSG00000181789	HMR_4312|HMR_4313|HMR_4314|HMR_6578	ATP <=> ATP|D-glucitol <=> D-glucitol
COQ2	ENSG00000173085	HMR_6903	4-hydroxybenzoate + all-trans-decaprenyl-diphosphate -> 3-decaprenyl-4-hydroxybenzoate + PPi	EC:2.5.1.39
COQ3	ENSG00000132423	COQ3m|HMR_6905|HMR_6910	3,4-dihydroxy-5-all-trans-decaprenylbenzoate + SAM -> 3-methoxy-4-hydroxy-5-all-trans-decaprenylbenzoate + H+ + SAH|3-demethylub... <Preview truncated at 128 characters>	EC:2.1.1.114|EC:2.1.1.64
COQ5	ENSG00000110871	HMR_6710|HMR_6737|HMR_6908	2-methoxy-6-all trans-decaprenyl-2-methoxy-1,4-benzoquinol + SAM -> 6-methoxy-3-methyl-2-all-trans-decaprenyl-1,4-benzoquinol + ... <Preview truncated at 128 characters>	EC:2.1.1.-|EC:2.1.1.201
COQ6	ENSG00000119723	COQ6m|HMR_1927|HMR_2129|HMR_2130|HMR_2131|HMR_2132|HMR_2133|HMR_2134|HMR_2135|HMR_2136|HMR_2142|HMR_2143|HMR_2144|HMR_2145|HMR_6... <Preview truncated at 128 characters>	2-methoxy-6-(all-trans-decaprenyl)phenol + H+ + NADPH + O2 -> 2-methoxy-6-all trans-decaprenyl-2-methoxy-1,4-benzoquinol + H2O +... <Preview truncated at 128 characters>	EC:1.14.13.-
COQ7	ENSG00000167186	COQ7m|HMR_6909	6-methoxy-3-methyl-2-all-trans-decaprenyl-1,4-benzoquinol + H+ + NADPH + O2 -> 3-demethylubiquinol-10 + H2O + NADP+|H+ + NADPH +... <Preview truncated at 128 characters>	3.1.1.1|EC:1.14.-.-
COX10	ENSG00000006695	HMR_5337	GSH + urocanate <=> S-[2-carboxy-1-(1H-imidazol-4-yl)ethyl]glutathione	EC:2.5.1.-
COX4I1	ENSG00000131143	CYOOm3i|HMR_6914	4 ferrocytochrome C + 7.92 H+ + O2 -> 4 ferricytochrome C + 1.96 H2O + 0.02 O2- + 4 H+|4 ferrocytochrome C + 8 H+ + O2 -> 4 ferr... <Preview truncated at 128 characters>	EC:1.9.3.1
COX4I2	ENSG00000131055	CYOOm3i|HMR_6914	4 ferrocytochrome C + 7.92 H+ + O2 -> 4 ferricytochrome C + 1.96 H2O + 0.02 O2- + 4 H+|4 ferrocytochrome C + 8 H+ + O2 -> 4 ferr... <Preview truncated at 128 characters>	EC:1.9.3.1
COX5A	ENSG00000178741	CYOOm3i|HMR_6914	4 ferrocytochrome C + 7.92 H+ + O2 -> 4 ferricytochrome C + 1.96 H2O + 0.02 O2- + 4 H+|4 ferrocytochrome C + 8 H+ + O2 -> 4 ferr... <Preview truncated at 128 characters>	EC:1.9.3.1
COX5B	ENSG00000135940	CYOOm3i|HMR_6914	4 ferrocytochrome C + 7.92 H+ + O2 -> 4 ferricytochrome C + 1.96 H2O + 0.02 O2- + 4 H+|4 ferrocytochrome C + 8 H+ + O2 -> 4 ferr... <Preview truncated at 128 characters>	EC:1.9.3.1
COX6B1	ENSG00000126267	CYOOm3i|HMR_6914	4 ferrocytochrome C + 7.92 H+ + O2 -> 4 ferricytochrome C + 1.96 H2O + 0.02 O2- + 4 H+|4 ferrocytochrome C + 8 H+ + O2 -> 4 ferr... <Preview truncated at 128 characters>	EC:1.9.3.1
COX7B	ENSG00000131174	CYOOm3i|HMR_6914	4 ferrocytochrome C + 7.92 H+ + O2 -> 4 ferricytochrome C + 1.96 H2O + 0.02 O2- + 4 H+|4 ferrocytochrome C + 8 H+ + O2 -> 4 ferr... <Preview truncated at 128 characters>	EC:1.9.3.1
COX7C	ENSG00000127184	CYOOm3i|HMR_6914	4 ferrocytochrome C + 7.92 H+ + O2 -> 4 ferricytochrome C + 1.96 H2O + 0.02 O2- + 4 H+|4 ferrocytochrome C + 8 H+ + O2 -> 4 ferr... <Preview truncated at 128 characters>	EC:1.9.3.1
CREBBP	ENSG00000005339	HMR_0024|HMR_9495	CoA + H+ + histone-N6-acetyl-L-lysine <=> acetyl-CoA + histone-L-lysine|fatty acid-ligands + PPARA -> activation-ppara	EC:2.3.1.48
CRLS1	ENSG00000088766	CLS_hs|HMR_0586	CDP-diacylglycerol-CL pool + PG-CL pool -> CL pool + CMP + H+|PG-CL pool + CDP-diacylglycerol-CL pool -> CL pool + CMP + H+	2.3.1.21|EC:2.7.8.-
CSNK1A1	ENSG00000113712	HMR_9577|HMR_9579	ATP + protamine -> ADP + O-phosphoprotamine|[protein] + ATP -> ADP + phosphoprotein	EC:2.7.11.1|EC:2.7.11.1; EC:2.7.11.8; EC:2.7.11.9; EC:2.7.11.10; EC:2.7.11.11; EC:2.7.11.12; EC:2.7.11.13; EC:2.7.11.17; EC:2.7.11.21; EC:2.7.11.22; EC:2.7.11.24; EC:2.7.11.25; EC:2.7.11.30; EC:2.7.12.1; EC:2.7.12.2
CSNK1G1	ENSG00000169118	HMR_9577|HMR_9579	ATP + protamine -> ADP + O-phosphoprotamine|[protein] + ATP -> ADP + phosphoprotein	EC:2.7.11.1|EC:2.7.11.1; EC:2.7.11.8; EC:2.7.11.9; EC:2.7.11.10; EC:2.7.11.11; EC:2.7.11.12; EC:2.7.11.13; EC:2.7.11.17; EC:2.7.11.21; EC:2.7.11.22; EC:2.7.11.24; EC:2.7.11.25; EC:2.7.11.30; EC:2.7.12.1; EC:2.7.12.2
CSNK2B	ENSG00000204435	HMR_9577	[protein] + ATP -> ADP + phosphoprotein	EC:2.7.11.1; EC:2.7.11.8; EC:2.7.11.9; EC:2.7.11.10; EC:2.7.11.11; EC:2.7.11.12; EC:2.7.11.13; EC:2.7.11.17; EC:2.7.11.21; EC:2.7.11.22; EC:2.7.11.24; EC:2.7.11.25; EC:2.7.11.30; EC:2.7.12.1; EC:2.7.12.2
CTDSP2	ENSG00000175215	HMR_9578	H2O + phosphoprotein -> [protein] + H+ + Pi	EC:3.1.3.16
CTDSPL2	ENSG00000137770	HMR_6545|HMR_6547|HMR_6557|HMR_6591	1-phosphatidyl-1D-myo-inositol-4-phosphate + H2O -> PI pool + Pi|1-phosphatidyl-myo-inositol-3,5-bisphosphate + H2O -> 1-phospha... <Preview truncated at 128 characters>	EC:3.1.3.-
CTPS1	ENSG00000171793	HMR_4032|HMR_4194	ATP + NH3 + UTP -> ADP + CTP + H+ + Pi|ATP + glutamine + H2O + UTP -> ADP + CTP + glutamate + 2 H+ + Pi	EC:6.3.4.2
CYC1	ENSG00000179091	HMR_6918	2 ferricytochrome C + 2 H+ + ubiquinol -> 2 ferrocytochrome C + ubiquinone + 4 H+	EC:1.10.2.2
CYP11A1	ENSG00000140459	HMR_1928|HMR_1929|HMR_1932|HMR_1934|HMR_1935|HMR_7935	17alpha,20alpha-dihydroxycholesterol + 4 H+ + 2 O2 + 4 reduced adrenal ferredoxin -> 17alpha-hydroxypregnenolone + 3 H2O + isoca... <Preview truncated at 128 characters>	EC:1.14.15.16|EC:1.14.15.6
DAD1	ENSG00000129562	HMR_7285	(Glc)3 (GlcNAc)2 (Man)9 (PP-Dol)1 + [protein]-L-asparagine -> (alpha-D-Glucosyl)3-(alpha-D-mannosyl)8-beta-D-mannosyl-diacetylch... <Preview truncated at 128 characters>	EC:2.4.99.18
DARS	ENSG00000115866	HMR_5134	aspartate + ATP + tRNA(asp) -> AMP + L-aspartyl-tRNA(asp) + PPi	EC:6.1.1.12
DDOST	ENSG00000244038	HMR_7285	(Glc)3 (GlcNAc)2 (Man)9 (PP-Dol)1 + [protein]-L-asparagine -> (alpha-D-Glucosyl)3-(alpha-D-mannosyl)8-beta-D-mannosyl-diacetylch... <Preview truncated at 128 characters>	EC:2.4.99.18
DHDDS	ENSG00000117682	HMR_5337|HMR_7254	16 isopentenyl-pPP + trans,trans,cis-geranyl-geranyl-pp -> dehydrodolichol-diphosphate + 16 PPi|GSH + urocanate <=> S-[2-carboxy... <Preview truncated at 128 characters>	EC:2.5.1.-|EC:2.5.1.87
DHFR	ENSG00000228716	HMR_4332|HMR_4333|HMR_4335|HMR_4654|HMR_4655|HMR_4656	dihydrofolate + H+ + NADH <=> NAD+ + THF|dihydrofolate + H+ + NADPH <=> NADP+ + THF|folate + NADH <=> dihydrofolate + NAD+|folat... <Preview truncated at 128 characters>	EC:1.5.1.3
DHODH	ENSG00000102967	HMR_4575	(S)-dihydroorotate + ubiquinone <=> orotate + ubiquinol	EC:1.3.5.2; EC:1.3.1.14
DHPS	ENSG00000095059	HMR_6965|HMR_6966|HMR_6967	1,3-diaminopropane + 1-pyrroline <=> dehydrospermidine|1,3-diaminopropane + deoxyhypusine <=> lysine + spermidine|dehydrospermid... <Preview truncated at 128 characters>	EC:2.5.1.46
DLD	ENSG00000091140	HMR_3800|HMR_3923|HMR_4137|HMR_4239|HMR_4665|HMR_5297|HMR_6397|HMR_6404|HMR_6409|HMR_6412|HMR_6523|HMR_8433|HMR_8434|HMR_8435|HM... <Preview truncated at 128 characters>	2-oxoadipate + CoA + NAD+ -> CO2 + glutaryl-CoA + NADH|2-oxobutyrate + CoA + NAD+ -> CO2 + NADH + propanoyl-CoA|5,10-methenyl-TH... <Preview truncated at 128 characters>	1.8.1.4|EC:1.11.1.7; EC:1.2.4.4; EC:1.8.1.4|EC:1.2.4.1; EC:2.3.1.12; EC:1.8.1.4; EC:1.2.1.51|EC:1.2.4.2|EC:1.2.7.2|EC:1.4.4.2|EC:1.8.1.4|EC:1.8.1.4; EC:2.1.2.10|EC:2.1.2.10|EC:2.3.1.12
DLST	ENSG00000119689	HMR_4239|HMR_5297|HMR_6414|HMR_6415	2-oxoadipate + CoA + NAD+ -> CO2 + glutaryl-CoA + NADH|AKG + CoA + NAD+ -> CO2 + NADH + succinyl-CoA|CoA + S-glutaryldihydrolipo... <Preview truncated at 128 characters>	EC:1.2.4.2|EC:2.3.1.61
DNM1L	ENSG00000087470	HMR_4136	GTP + H2O -> GDP + H+ + Pi	EC:3.6.5.1; EC:3.6.5.2; EC:3.6.5.3; EC:3.6.5.4; EC:3.6.5.5; EC:3.6.5.6
DNM2	ENSG00000079805	HMR_4136	GTP + H2O -> GDP + H+ + Pi	EC:3.6.5.1; EC:3.6.5.2; EC:3.6.5.3; EC:3.6.5.4; EC:3.6.5.5; EC:3.6.5.6
DNMT1	ENSG00000130816	HMR_4072|HMR_8640|HMR_8641	DNA + SAM -> DNA-5-methylcytosine + H+ + SAH|DNA + se-adenosylselenomethionine -> DNA-5-methylcytosine + H+ + se-adenosyl-L-sele... <Preview truncated at 128 characters>	EC:2.1.1.37
DOLK	ENSG00000175283	HMR_7263	CTP + dolichol -> CDP + dolichyl-phosphate + H+	EC:2.7.1.108
DOLPP1	ENSG00000167130	HMR_7256|HMR_8691	dolichyl-diphosphate + H2O -> dolichyl-phosphate + H+ + Pi	EC:3.6.1.43
DPAGT1	ENSG00000172269	HMR_7264	dolichyl-phosphate + UDP-N-acetylglucosamine -> N-acetyl-D-glucosaminyldiphosphodolichol + UMP	EC:2.7.8.15
DPH5	ENSG00000117543	HMR_9549	H+ + peptide-2-[3-carboxy-3-(methylammonio)propyl]-L-histidine + SAH <=> peptide-2-(3-carboxy-3-aminopropyl)-L-histidine + SAM	EC:2.1.1.98
DPM1	ENSG00000000419	HMR_7271|HMR_7275	dolichyl-phosphate + GDP-mannose -> dolichyl-phosphate-D-mannose + GDP|dolichyl-phosphate-D-mannose + G10595 -> dolichyl-phospha... <Preview truncated at 128 characters>	EC:2.4.1.259|EC:2.4.1.83
DTYMK	ENSG00000168393	DTMPKm|HMR_3968|HMR_4637|HMR_4640|HMR_6612|HMR_6613	ADP + dTDP <=> ATP + dTMP|ADP + dUDP <=> ATP + dUMP|ATP + dTMP -> ADP + dTDP|ATP + dUMP -> ADP + dUDP|dADP + dTDP <=> dATP + dTM... <Preview truncated at 128 characters>	EC:2.7.4.12; EC:2.7.4.9|EC:2.7.4.4; EC:2.7.4.9|EC:2.7.4.9
DUSP26	ENSG00000133878	HMR_7618|HMR_9578	H2O + phosphoprotein -> [protein] + H+ + Pi|[protein]-tyrosine-phosphate + H2O -> [protein]-L-tyrosine + Pi	EC:3.1.3.16|EC:3.1.3.48
DUT	ENSG00000128951	HMR_3965|HMR_4643|HMR_8483	dUDP + H2O -> dUMP + H+ + Pi|dUTP + H2O -> dUMP + H+ + PPi	EC:3.6.1.23|EC:3.6.1.23; EC:3.6.1.19
DYRK1A	ENSG00000157540	HMR_7617|HMR_9577	[protein] + ATP -> ADP + phosphoprotein|[protein]-L-tyrosine + ATP -> [protein]-tyrosine-phosphate + ADP + H+	EC:2.7.10.1; EC:2.7.10.2; EC:2.7.12.1; EC:2.7.12.2|EC:2.7.11.1; EC:2.7.11.8; EC:2.7.11.9; EC:2.7.11.10; EC:2.7.11.11; EC:2.7.11.12; EC:2.7.11.13; EC:2.7.11.17; EC:2.7.11.21; EC:2.7.11.22; EC:2.7.11.24; EC:2.7.11.25; EC:2.7.11.30; EC:2.7.12.1; EC:2.7.12.2
EEF1A1	ENSG00000156508	HMR_4136	GTP + H2O -> GDP + H+ + Pi	EC:3.6.5.1; EC:3.6.5.2; EC:3.6.5.3; EC:3.6.5.4; EC:3.6.5.5; EC:3.6.5.6
EEF2	ENSG00000167658	HMR_4136	GTP + H2O -> GDP + H+ + Pi	EC:3.6.5.1; EC:3.6.5.2; EC:3.6.5.3; EC:3.6.5.4; EC:3.6.5.5; EC:3.6.5.6
EIF2AK4	ENSG00000128829	HMR_9577|HMR_9579	ATP + protamine -> ADP + O-phosphoprotamine|[protein] + ATP -> ADP + phosphoprotein	EC:2.7.11.1|EC:2.7.11.1; EC:2.7.11.8; EC:2.7.11.9; EC:2.7.11.10; EC:2.7.11.11; EC:2.7.11.12; EC:2.7.11.13; EC:2.7.11.17; EC:2.7.11.21; EC:2.7.11.22; EC:2.7.11.24; EC:2.7.11.25; EC:2.7.11.30; EC:2.7.12.1; EC:2.7.12.2
ELOVL1	ENSG00000066322	HMR_2190|HMR_2201|HMR_2205|HMR_2211|HMR_2215|HMR_2259|HMR_2263|HMR_2267|HMR_2305|HMR_2315|HMR_2324|HMR_2332|HMR_2342|HMR_2347|HM... <Preview truncated at 128 characters>	(11Z)-eicosenoyl-CoA + H+ + malonyl-CoA -> 3-oxo-13cis-docosenoyl-CoA + CO2 + CoA|(11Z)-eicosenoyl-CoA + H+ + malonyl-CoA -> CO2... <Preview truncated at 128 characters>	2.7.4.9|3.1.2.2|3.3.2.9|EC:2.3.1.199
ELP3	ENSG00000134014	HMR_9495	CoA + H+ + histone-N6-acetyl-L-lysine <=> acetyl-CoA + histone-L-lysine	EC:2.3.1.48
ENO1	ENSG00000074800	HMR_4363	2-phospho-D-glycerate <=> H2O + PEP	EC:4.2.1.11
EP300	ENSG00000100393	HMR_9495	CoA + H+ + histone-N6-acetyl-L-lysine <=> acetyl-CoA + histone-L-lysine	EC:2.3.1.48
EPRS	ENSG00000136628	HMR_5137|HMR_5146	ATP + glutamate + tRNA(glu) -> AMP + L-glutamyl-tRNA(glu) + PPi|ATP + proline + tRNA(pro) -> AMP + L-prolyl-tRNA(pro) + PPi	EC:6.1.1.15|EC:6.1.1.17
EXTL1	ENSG00000158008	HMR_7209|HMR_7211|HMR_7213|HMR_7215	heparan sulfate, precursor 2 + UDP-N-acetylglucosamine -> H+ + heparan sulfate, precursor 3 + UDP|heparan sulfate, precursor 4 +... <Preview truncated at 128 characters>	EC:2.4.1.223; EC:2.4.1.224; EC:2.4.1.225
EXTL3	ENSG00000012232	HMR_7207|HMR_7209|HMR_7211|HMR_7213|HMR_7215	3-beta-D-glucuronosyl-3-beta-D-galactosyl-4-beta-D-galactosyl-O-beta-D-xylosylprotein + UDP-N-acetylglucosamine -> H+ + heparan ... <Preview truncated at 128 characters>	EC:2.4.1.223|EC:2.4.1.223; EC:2.4.1.224; EC:2.4.1.225
EZH2	ENSG00000106462	HMR_4241|HMR_8025|HMR_8026|HMR_8027	H+ + histone-N6-methyl-L-lysine + SAH <=> histone-L-lysine + SAM|[protein]-L-lysine + SAM -> H+ + histone-N6-methyl-L-lysine + S... <Preview truncated at 128 characters>	EC:2.1.1.43
FADS2	ENSG00000134824	DESAT14_9|DESAT18_10|DESAT18_6|DESAT18_7|DESAT18_8|DESAT18_9|HMR_0030|HMR_2359|HMR_2365|HMR_2368|HMR_2380|HMR_2472|HMR_2484|HMR_... <Preview truncated at 128 characters>	(2E)-octadecenoyl-CoA + H+ + NADH + O2 -> (6Z,9Z)-octadecadienoyl-CoA + 2 H2O + NAD+|(8Z,11Z)-eicosadienoyl-CoA + H+ + NADPH + O... <Preview truncated at 128 characters>	EC:1.14.19.-|EC:1.14.19.3
FARSA	ENSG00000179115	HMR_5145	ATP + phenylalanine + tRNA(phe) -> AMP + L-phenylalanyl-tRNA(phe) + PPi	EC:6.1.1.20
FARSB	ENSG00000116120	HMR_5145	ATP + phenylalanine + tRNA(phe) -> AMP + L-phenylalanyl-tRNA(phe) + PPi	EC:6.1.1.20
FASN	ENSG00000169710	FAS80COA_L|HMR_0030|HMR_2150|HMR_2151|HMR_2152|HMR_2153|HMR_2154|HMR_2155|HMR_2156|HMR_2157|HMR_2158|HMR_2159|HMR_2160|HMR_2161|... <Preview truncated at 128 characters>	(2E)-decenoyl-[ACP] + H+ + NADPH -> decanoyl-[ACP] + NADP+|(2E)-dodecenoyl-[ACP] + H+ + NADPH -> dodecanoyl-[ACP] + NADP+|(2E)-h... <Preview truncated at 128 characters>	EC:2.1.3.85; EC:1.3.1.39|EC:2.3.1.85|EC:2.3.1.85; EC:1.3.1.39|EC:2.3.1.85; EC:2.3.1.179|EC:2.3.1.85; EC:2.3.1.39|EC:2.3.1.85; EC:2.3.1.41; EC:2.3.1.179|EC:2.3.1.85; EC:2.3.1.86; EC:1.1.1.100|EC:2.3.1.85; EC:4.2.1.59|EC:3.1.2.14; EC:2.3.1.85|EC:3.1.2.14; EC:3.1.2.21
FBL	ENSG00000105202	HMR_6710|HMR_6737	beta-carboline + SAM -> H+ + harman + SAH|salsolinol + SAM -> (R)-1,2-dimethyl-5,6-dihydroxy-tetrahydroisoquinoline + H+ + SAH	EC:2.1.1.-
FDFT1	ENSG00000079459	HMR_0026|HMR_1465|HMR_1467|SQLSr|r0170|r0575	2 farnesyl-PP <=> PPi + presqualene-PP|H+ + NADPH + 2 farnesyl-PP -> NADP+ + 2 PPi + squalene|H+ + NADPH + presqualene-PP -> NAD... <Preview truncated at 128 characters>	EC:2.5.1.21
FDPS	ENSG00000160752	DMATTx|GRTTx|HMR_1457|HMR_1460|HMR_1532	PPi + trans,trans,cis-geranyl-geranyl-pp <=> dimethylallyl-PP + farnesyl-PP|dimethylallyl-PP + isopentenyl-pPP -> geranyl-PP + P... <Preview truncated at 128 characters>	2.5.1.1|2.5.1.10|EC:2.5.1.10|EC:2.5.1.1; EC:2.5.1.10; EC:2.5.1.29
FDXR	ENSG00000161513	HMR_7741	H+ + NADP+ + 2 reduced ferredoxin <=> NADPH + 2 oxidized ferredoxin	EC:1.18.1.2
FGR	ENSG00000000938	HMR_7617	[protein]-L-tyrosine + ATP -> [protein]-tyrosine-phosphate + ADP + H+	EC:2.7.10.1; EC:2.7.10.2; EC:2.7.12.1; EC:2.7.12.2
FH	ENSG00000091483	HMR_3831|HMR_4408|HMR_4410	aspartate -> fumarate + H+ + NH3|fumarate + H2O <=> malate	EC:4.2.1.2|EC:4.3.1.1
FHL2	ENSG00000115641	HMR_0024	fatty acid-ligands + PPARA -> activation-ppara
FNTA	ENSG00000168522	HMR_7166	[protein]-L-cysteine + farnesyl-PP -> PPi + S-farnesyl-protein	EC:2.5.1.58
FNTB	ENSG00000257365	HMR_7166	[protein]-L-cysteine + farnesyl-PP -> PPi + S-farnesyl-protein	EC:2.5.1.58
FPGS	ENSG00000136877	HMR_5392|HMR_7908|HMR_7909|HMR_7910|HMR_7911|HMR_7912|HMR_7913|HMR_8105|HMR_8106|HMR_8107|HMR_8108|HMR_8109|HMR_8110|HMR_8112|HM... <Preview truncated at 128 characters>	10-formyl-THF + 4 ATP + 4 glutamate -> 10-formyl-THF-glu(5) + 4 ADP + 4 H+ + 4 Pi|10-formyl-THF-glu(5) + ATP + glutamate -> 10-f... <Preview truncated at 128 characters>	EC:6.3.2.17
FRMPD2	ENSG00000170324	HMR_7618	[protein]-tyrosine-phosphate + H2O -> [protein]-L-tyrosine + Pi	EC:3.1.3.48
FTSJ3	ENSG00000108592	HMR_6710|HMR_6737	beta-carboline + SAM -> H+ + harman + SAH|salsolinol + SAM -> (R)-1,2-dimethyl-5,6-dihydroxy-tetrahydroisoquinoline + H+ + SAH	EC:2.1.1.-
G6PD	ENSG00000160211	G6PDH2c|HMR_4304|HMR_4306	3 glucose-6-phosphate + 3 NADP+ -> 3 glucono-1,5-lactone-6-phosphate + 3 H+ + 3 NADPH|glucono-1,5-lactone-6-phosphate + H+ + NAD... <Preview truncated at 128 characters>	EC:1.1.1.49
GAK	ENSG00000178950	HMR_9577|HMR_9579	ATP + protamine -> ADP + O-phosphoprotamine|[protein] + ATP -> ADP + phosphoprotein	EC:2.7.11.1|EC:2.7.11.1; EC:2.7.11.8; EC:2.7.11.9; EC:2.7.11.10; EC:2.7.11.11; EC:2.7.11.12; EC:2.7.11.13; EC:2.7.11.17; EC:2.7.11.21; EC:2.7.11.22; EC:2.7.11.24; EC:2.7.11.25; EC:2.7.11.30; EC:2.7.12.1; EC:2.7.12.2
GALE	ENSG00000117308	HMR_4128|HMR_4159|HMR_7698	UDP-N-acetyl-D-galactosamine <=> UDP-N-acetylglucosamine|UDP-galactose <=> UDP-glucose|dTDP-galactose <=> dTDP-glucose	EC:5.1.3.2|EC:5.1.3.7
GANAB	ENSG00000089597	HMR_7287	(alpha-D-Glucosyl)2-(alpha-D-mannosyl)8-beta-D-mannosyl-diacetylchitobiosyl-L-asparagine (protein) + H2O -> (alpha-D-Glucosyl)-(... <Preview truncated at 128 characters>	EC:3.2.1.84
GAPDH	ENSG00000111640	HMR_4373	1,3-bisphospho-D-glycerate + H+ + NADH <=> GAP + NAD+ + Pi	EC:1.2.1.12
GARS	ENSG00000106105	HMR_5138	ATP + glycine + tRNA(gly) -> AMP + glycyl-tRNA(gly) + PPi	EC:6.1.1.14
GART	ENSG00000159131	HMR_4799|HMR_4802|HMR_4806	10-formyl-THF + GAR -> H+ + N-formyl-GAR + THF|5-phosphoribosylamine + ATP + glycine -> ADP + GAR + H+ + Pi|5-phosphoribosylform... <Preview truncated at 128 characters>	EC:2.1.2.2|EC:6.3.3.1|EC:6.3.4.13
GCLC	ENSG00000001084	HMR_4324	ATP + cysteine + glutamate -> ADP + gamma-glutamyl-cysteine + H+ + Pi	EC:6.3.2.2
GCNT1	ENSG00000187210	HMR_7180|HMR_7440|HMR_8257	T-antigen + UDP-N-acetylglucosamine -> core 2 + H+ + UDP|Tn-antigen + UDP-N-acetylglucosamine -> G00031 + H+ + UDP|Tn-antigen + ... <Preview truncated at 128 characters>	EC:2.4.1.102
GCSH	ENSG00000140905	HMR_3923|HMR_4665|HMR_6409|HMR_8433|HMR_8434|HMR_8435|HMR_8436|HMR_8437	5,10-methenyl-THF + H2O -> 5-formyl-THF + H+|H+ + lipoamide + NADH <=> dihydrolipoamide + NAD+|H+ + lipoylprotein + NADH <=> dih... <Preview truncated at 128 characters>	EC:1.4.4.2|EC:1.8.1.4; EC:2.1.2.10|EC:2.1.2.10
GFM1	ENSG00000168827	HMR_4136	GTP + H2O -> GDP + H+ + Pi	EC:3.6.5.1; EC:3.6.5.2; EC:3.6.5.3; EC:3.6.5.4; EC:3.6.5.5; EC:3.6.5.6
GFM2	ENSG00000164347	HMR_4136	GTP + H2O -> GDP + H+ + Pi	EC:3.6.5.1; EC:3.6.5.2; EC:3.6.5.3; EC:3.6.5.4; EC:3.6.5.5; EC:3.6.5.6
GFPT1	ENSG00000198380	HMR_4300	fructose-6-phosphate + glutamine -> glucosamine-6-phosphate + glutamate	EC:2.6.1.16
GGPS1	ENSG00000152904	FRTT|HMR_1457|HMR_1460|HMR_1532	PPi + trans,trans,cis-geranyl-geranyl-pp <=> dimethylallyl-PP + farnesyl-PP|dimethylallyl-PP + isopentenyl-pPP -> geranyl-PP + P... <Preview truncated at 128 characters>	2.5.1.29|EC:2.5.1.10|EC:2.5.1.1; EC:2.5.1.10; EC:2.5.1.29
GGTLC2	ENSG00000100121	HMR_1084|HMR_2556|HMR_4175|HMR_4176|HMR_4796|HMR_4937|HMR_8548|HMR_8769|HMR_9571|HMR_9572	GSH + H2O -> cys-gly + glutamate|H+ + leukotriene C4 -> 5-L-gamma-glutamyl + LTD4|H2O + leukotriene C4 -> glutamate + LTD4|H2O +... <Preview truncated at 128 characters>	EC:2.3.2.2|EC:2.3.2.2; EC:3.4.11.4
GLE1	ENSG00000119392	HMR_8639	DNA <=> DNA
GMPPB	ENSG00000173540	HMR_4386|HMR_4387	GDP + H+ + mannose-1-phosphate -> GDP-mannose + Pi|GTP + H+ + mannose-1-phosphate -> GDP-mannose + PPi	EC:2.7.7.13|EC:2.7.7.22; EC:2.7.7.13
GMPS	ENSG00000163655	HMR_4046|HMR_4453	ATP + NH3 + xanthosine-5-phosphate -> AMP + GMP + H+ + PPi|ATP + glutamine + H2O + xanthosine-5-phosphate -> AMP + glutamate + G... <Preview truncated at 128 characters>	EC:6.3.4.1|EC:6.3.5.2
GOT1	ENSG00000120053	EHGLAT|HMR_3829|HMR_3861|HMR_3912|HMR_4786|HMR_6725|HMR_6768|HMR_8066	3-sulfinoalanine + AKG + H+ -> 3-sulfinylpyruvic acid + glutamate|3-sulfopyruvate + glutamate <=> AKG + L-cysteate|AKG + L-eryth... <Preview truncated at 128 characters>	2.6.1.1|EC:2.6.1.1|EC:2.6.1.1; EC:2.6.1.23|EC:2.6.1.1; EC:2.6.1.3|EC:2.6.1.1; EC:2.6.1.5; EC:2.6.1.57
GPI	ENSG00000105220	HMR_4381|HMR_4856|HMR_7748|HMR_7749	beta-D-glucose-6-phosphate <=> fructose-6-phosphate|beta-D-glucose-6-phosphate <=> glucose-6-phosphate|fructose-6-phosphate <=> ... <Preview truncated at 128 characters>	EC:5.3.1.9|TCDB:2.A.1.4.5
GRHPR	ENSG00000137106	HMR_3856|HMR_4465|HMR_7702|HMR_8501|HMR_8779|HMR_8782	H+ + hydroxypyruvate + NADH -> glycerate + NAD+|H+ + hydroxypyruvate + NADPH -> glycerate + NADP+|H+ + methylglyoxal + NADH -> D... <Preview truncated at 128 characters>	EC:1.1.1.79; EC:1.1.1.81
GSS	ENSG00000100983	HMR_4326	ATP + gamma-glutamyl-cysteine + glycine -> ADP + GSH + H+ + Pi	EC:6.3.2.3
GSTP1	ENSG00000084207	HMR_1050|HMR_1053|HMR_1054|HMR_1119|HMR_1120|HMR_1121|HMR_1122|HMR_1367|HMR_1370|HMR_1379|HMR_1384|HMR_1398|HMR_2068|HMR_2069|HM... <Preview truncated at 128 characters>	(1R,2S)-naphthalene 1,2-oxide + GSH -> (1R)-hydroxy-(2R)-glutathionyl-1,2-dihydronaphthalene + H+|(1S,2R)-naphthalene 1,2-oxide ... <Preview truncated at 128 characters>	EC:1.1.1.188; EC:2.5.1.18|EC:2.5.1.18
GTF3C4	ENSG00000125484	HMR_9495	CoA + H+ + histone-N6-acetyl-L-lysine <=> acetyl-CoA + histone-L-lysine	EC:2.3.1.48
GUK1	ENSG00000143774	HMR_4020|HMR_4135|HMR_5353	ADP + GDP <=> ATP + GMP|ADP + dGDP <=> ATP + dGMP	EC:2.7.4.8
HARS	ENSG00000170445	HMR_5139	ATP + histidine + tRNA(his) -> AMP + L-histidyl-tRNA(his) + PPi	EC:6.1.1.21
HCCS	ENSG00000004961	HMR_4762	apocytochrome-C + heme -> cytochrome-C	EC:4.4.1.17
HDAC3	ENSG00000171720	HMR_0024	fatty acid-ligands + PPARA -> activation-ppara
HDLBP	ENSG00000115677	HMR_1916|HMR_1917	cholesterol <=> cholesterol
HECTD1	ENSG00000092148	HMR_9491	[protein]-L-lysine + ATP + ubiquitin -> [protein]-N-ubiquityllysine + AMP + PPi	EC:6.3.2.19
HECTD3	ENSG00000126107	HMR_9491	[protein]-L-lysine + ATP + ubiquitin -> [protein]-N-ubiquityllysine + AMP + PPi	EC:6.3.2.19
HEMK1	ENSG00000114735	HMR_6710|HMR_6737	beta-carboline + SAM -> H+ + harman + SAH|salsolinol + SAM -> (R)-1,2-dimethyl-5,6-dihydroxy-tetrahydroisoquinoline + H+ + SAH	EC:2.1.1.-
HK2	ENSG00000159399	HMR_4319|HMR_4394|HMR_4486|HMR_4487|HMR_4488|HMR_4489|HMR_4490|HMR_4492|HMR_4493|HMR_4494|HMR_4495|HMR_4496|HMR_7746	ATP + beta-D-glucose -> ADP + beta-D-glucose-6-phosphate + H+|ATP + fructose -> ADP + fructose-6-phosphate + H+|ATP + glucosamin... <Preview truncated at 128 characters>	EC:2.7.1.1|EC:2.7.1.1; EC:2.7.1.2|EC:2.7.1.1; EC:2.7.1.2; EC:2.7.1.147
HMBS	ENSG00000256269	HMR_4746	H2O + 4 porphobilinogen -> 4 H+ + hydroxymethylbilane + 4 NH3	EC:2.5.1.61
HMGCR	ENSG00000113161	HMGCOARr|HMR_0026|HMR_1440|HMR_4630	2 H+ + 2 NADPH + HMG-CoA -> CoA + 2 NADP+ + (R)-mevalonate|2 H+ + HMG-CoA + 2 NADPH -> (R)-mevalonate + CoA + 2 NADP+|activation... <Preview truncated at 128 characters>	EC:1.1.1.34
HMGCS1	ENSG00000112972	HMR_0025|HMR_1437|HMR_4604	acetoacetyl-CoA + acetyl-CoA + H2O -> CoA + H+ + HMG-CoA|activation-ppara -> activation-ppara	EC:2.3.3.10
HPRT1	ENSG00000165704	HMR_4418|HMR_4452|HMR_4664	GMP + PPi <=> guanine + PRPP|IMP + PPi <=> hypoxanthine + PRPP|PRPP + xanthine -> PPi + xanthosine-5-phosphate	EC:2.4.2.22|EC:2.4.2.8
HSD17B10	ENSG00000072506	HMR_1065|HMR_1066|HMR_1067|HMR_1068|HMR_1069|HMR_1070|HMR_1165|HMR_1178|HMR_1183|HMR_1208|HMR_1220|HMR_1225|HMR_1257|HMR_1274|HM... <Preview truncated at 128 characters>	(11Z)-docosenoyl-CoA + 10 CoA + 9 FAD + 10 H2O + 10 NAD+ -> 11 acetyl-CoA + 9 FADH2 + 10 H+ + 10 NADH|(11Z,14Z)-eicosadienoyl-Co... <Preview truncated at 128 characters>	1.1.1.35|EC:1.1.1.178; EC:1.1.1.35|EC:1.1.1.31; EC:1.1.1.35|EC:1.1.1.35; EC:1.1.1.211|EC:1.1.1.35; EC:1.3.1.34; EC:1.3.3.6; EC:2.3.1.16; EC:3.1.2.2; EC:3.1.2.27; EC:4.2.1.17; EC:5.1.99.4; EC:5.3.3.8; EC:6.2.1.-|EC:1.1.1.35; EC:1.3.3.6; EC:2.3.1.154; EC:2.3.1.16; EC:3.1.2.2; EC:4.2.1.17; EC:5.1.99.4; EC:6.2.1.-|EC:4.2.1.17; EC:1.1.1.35; EC:1.1.1.211; EC:1.3.8.7; EC:1.3.8.8; EC:1.3.8.9; EC:2.3.1.16
HSD17B12	ENSG00000149084	HMR_1074|HMR_1228|HMR_1229|HMR_1230|HMR_1973|HMR_1974|HMR_2036|HMR_2041|HMR_2191|HMR_2202|HMR_2208|HMR_2212|HMR_2217|HMR_2260|HM... <Preview truncated at 128 characters>	12(S)-HETE + H+ + NADH <=> 12-hetre + NAD+|12-keto-LTB4 + H+ + NADH -> 10,11-dihydro-12-oxo-LTB4 + NAD+|3-keto-eicosa-8,11,14,17... <Preview truncated at 128 characters>	EC:1.1.1.330|EC:1.1.1.62|EC:1.1.1.62; EC:1.1.1.64|EC:1.3.1.-
HUWE1	ENSG00000086758	HMR_9491	[protein]-L-lysine + ATP + ubiquitin -> [protein]-N-ubiquityllysine + AMP + PPi	EC:6.3.2.19
IARS	ENSG00000196305	HMR_5140	ATP + isoleucine + tRNA(ile) -> AMP + L-isoleucyl-tRNA(ile) + PPi	EC:6.1.1.5
IDH3A	ENSG00000166411	HMR_3957	isocitrate + NAD+ -> AKG + CO2 + NADH	EC:1.1.1.41
IGF1R	ENSG00000140443	HMR_7617	[protein]-L-tyrosine + ATP -> [protein]-tyrosine-phosphate + ADP + H+	EC:2.7.10.1; EC:2.7.10.2; EC:2.7.12.1; EC:2.7.12.2
IKBKB	ENSG00000104365	HMR_9577	[protein] + ATP -> ADP + phosphoprotein	EC:2.7.11.1; EC:2.7.11.8; EC:2.7.11.9; EC:2.7.11.10; EC:2.7.11.11; EC:2.7.11.12; EC:2.7.11.13; EC:2.7.11.17; EC:2.7.11.21; EC:2.7.11.22; EC:2.7.11.24; EC:2.7.11.25; EC:2.7.11.30; EC:2.7.12.1; EC:2.7.12.2
IMPDH2	ENSG00000178035	HMR_4040	H2O + IMP + NAD+ -> H+ + NADH + xanthosine-5-phosphate	EC:1.1.1.205
INPPL1	ENSG00000165458	HMR_6545|HMR_6547|HMR_6557|HMR_6591|HMR_8808	1-phosphatidyl-1D-myo-inositol-4-phosphate + H2O -> PI pool + Pi|1-phosphatidyl-myo-inositol-3,5-bisphosphate + H2O -> 1-phospha... <Preview truncated at 128 characters>	EC:3.1.3.-
IPMK	ENSG00000151151	HMR_10067|HMR_6568|HMR_6573|HMR_6574|HMR_8799|HMR_8800|HMR_8803|HMR_8804|HMR_8805	1D-myo-inositol-1,3,4,5,6-pentakisphosphate + H2O -> 1D-myo-inositol-1,4,5,6-tetrakisphosphate + Pi|1D-myo-inositol-1,3,4,5-tetr... <Preview truncated at 128 characters>	EC:2.7.1.140|EC:2.7.1.151
IPPK	ENSG00000127080	HMR_6576	1D-myo-inositol-1,3,4,5,6-pentakisphosphate + ATP -> ADP + H+ + myo-inositol-hexakisphosphate	EC:2.7.1.158
IREB2	ENSG00000136381	HMR_4454	citrate <=> isocitrate	EC:4.2.1.3
ITPK1	ENSG00000100605	HMR_6566|HMR_6567|HMR_6575	1D-myo-inositol-1,3,4,5,6-pentakisphosphate + ADP + H+ <=> 1D-myo-inositol-3,4,5,6-tetrakisphosphate + ATP|1D-myo-inositol-1,3,4... <Preview truncated at 128 characters>	EC:2.7.1.134|EC:2.7.1.159
KANSL3	ENSG00000114982	HMR_9464	dextrin + H2O -> dextrin(n-1) + glucose	EC:3.2.1.3; EC:3.2.1.10
KARS	ENSG00000065427	HMR_5142	ATP + lysine + tRNA(lys) -> AMP + L-lysyl-tRNA(lys) + PPi	EC:6.1.1.6
KAT2A	ENSG00000108773	HMR_9495	CoA + H+ + histone-N6-acetyl-L-lysine <=> acetyl-CoA + histone-L-lysine	EC:2.3.1.48
KAT5	ENSG00000172977	HMR_9495	CoA + H+ + histone-N6-acetyl-L-lysine <=> acetyl-CoA + histone-L-lysine	EC:2.3.1.48
KAT7	ENSG00000136504	HMR_9495	CoA + H+ + histone-N6-acetyl-L-lysine <=> acetyl-CoA + histone-L-lysine	EC:2.3.1.48
KAT8	ENSG00000103510	HMR_9495	CoA + H+ + histone-N6-acetyl-L-lysine <=> acetyl-CoA + histone-L-lysine	EC:2.3.1.48
KDSR	ENSG00000119537	HMR_0741	3-dehydrosphinganine + H+ + NADPH -> NADP+ + sphinganine	EC:1.1.1.102
KMT2A	ENSG00000118058	HMR_4241|HMR_6975|HMR_6976|HMR_6977|HMR_8025|HMR_8026|HMR_8027	H+ + histone-N6-methyl-L-lysine + SAH <=> histone-L-lysine + SAM|[protein]-L-lysine + SAM -> H+ + histone-N6-methyl-L-lysine + S... <Preview truncated at 128 characters>	EC:2.1.1.43
KMT2B	ENSG00000272333	HMR_4241|HMR_6975|HMR_6976|HMR_6977|HMR_8025|HMR_8026|HMR_8027	H+ + histone-N6-methyl-L-lysine + SAH <=> histone-L-lysine + SAM|[protein]-L-lysine + SAM -> H+ + histone-N6-methyl-L-lysine + S... <Preview truncated at 128 characters>	EC:2.1.1.43
KMT2D	ENSG00000167548	HMR_4241|HMR_6975|HMR_6976|HMR_6977|HMR_8025|HMR_8026|HMR_8027	H+ + histone-N6-methyl-L-lysine + SAH <=> histone-L-lysine + SAM|[protein]-L-lysine + SAM -> H+ + histone-N6-methyl-L-lysine + S... <Preview truncated at 128 characters>	EC:2.1.1.43
KPNA6	ENSG00000025800	HMR_7743	GDP + H+ <=> GDP + H+
LARS	ENSG00000133706	HMR_5141	ATP + leucine + tRNA(leu) -> AMP + L-leucyl-tRNA(leu) + PPi	EC:6.1.1.4
LCMT1	ENSG00000205629	HMR_6710|HMR_6737	beta-carboline + SAM -> H+ + harman + SAH|salsolinol + SAM -> (R)-1,2-dimethyl-5,6-dihydroxy-tetrahydroisoquinoline + H+ + SAH	EC:2.1.1.-
LIAS	ENSG00000121897	HMR_6400|HMR_6403	5 H+ + 7 NADPH + octanoyl-[ACP] + 2 PAPS + 2 SAM -> 2 5-deoxyadenosine + 6 H2O + lipoyl-[ACP] + 2 methionine + 7 NADP+ + 2 PAP|[... <Preview truncated at 128 characters>	EC:2.8.1.8|EC:2.8.1.8; EC:2.3.1.181
LIPT1	ENSG00000144182	HMR_1088|HMR_1091|HMR_6398|HMR_6399	ATP + H+ + lipoic acid -> lipoyl-AMP + PPi|CoA + H+ + N-acetyl-LTE4 <=> acetyl-CoA + leukotriene E4|apoA1 + lipoyl-AMP -> [prote... <Preview truncated at 128 characters>	EC:2.3.1.-|EC:2.7.7.63
LIPT2	ENSG00000175536	HMR_6400|HMR_6401|HMR_6402	5 H+ + 7 NADPH + octanoyl-[ACP] + 2 PAPS + 2 SAM -> 2 5-deoxyadenosine + 6 H2O + lipoyl-[ACP] + 2 methionine + 7 NADP+ + 2 PAP|a... <Preview truncated at 128 characters>	EC:2.3.1.181|EC:2.8.1.8; EC:2.3.1.181
LPCAT3	ENSG00000111684	HMR_0158|HMR_0632|HMR_0644|HMR_1088|HMR_1091|HMR_7602|HMR_7614	1-(1-alkenyl)-sn-glycero-3-phosphoethanolamine + acyl-CoA pool -> CoA + O-1-alk-1-enyl-2-acyl-sn-glycero-3-phosphoethanolamine|1... <Preview truncated at 128 characters>	EC:2.3.1.-|EC:2.3.1.23
LSS	ENSG00000160285	HMR_1473|LNSTLSr	squalene 2,3-oxide -> lanosterol	5.4.99.7|EC:5.4.99.7
MACROD1	ENSG00000133315	HMR_5336|HMR_5339|HMR_5340	2 H2O + S-[2-carboxy-1-(1H-imidazol-4-yl)ethyl]glutathione <=> glutamate + glycine + S-[2-carboxy-1-(1H-imidazol-4-yl)ethyl]-L-c... <Preview truncated at 128 characters>	EC:3.5.1.-
MAN2C1	ENSG00000140400	A_MANASE|HMR_7428	(alpha-D-mannosyl)2-beta-D-mannosyl-N-acetylglucosamine + 2 H2O -> beta-1,4-mannose-N-acetylglucosamine + 2 mannose|2 H2O + (alp... <Preview truncated at 128 characters>	3.2.1.24|EC:3.2.1.24
MAP2K1	ENSG00000169032	HMR_7617|HMR_9577	[protein] + ATP -> ADP + phosphoprotein|[protein]-L-tyrosine + ATP -> [protein]-tyrosine-phosphate + ADP + H+	EC:2.7.10.1; EC:2.7.10.2; EC:2.7.12.1; EC:2.7.12.2|EC:2.7.11.1; EC:2.7.11.8; EC:2.7.11.9; EC:2.7.11.10; EC:2.7.11.11; EC:2.7.11.12; EC:2.7.11.13; EC:2.7.11.17; EC:2.7.11.21; EC:2.7.11.22; EC:2.7.11.24; EC:2.7.11.25; EC:2.7.11.30; EC:2.7.12.1; EC:2.7.12.2
MAP2K3	ENSG00000034152	HMR_7617|HMR_9577	[protein] + ATP -> ADP + phosphoprotein|[protein]-L-tyrosine + ATP -> [protein]-tyrosine-phosphate + ADP + H+	EC:2.7.10.1; EC:2.7.10.2; EC:2.7.12.1; EC:2.7.12.2|EC:2.7.11.1; EC:2.7.11.8; EC:2.7.11.9; EC:2.7.11.10; EC:2.7.11.11; EC:2.7.11.12; EC:2.7.11.13; EC:2.7.11.17; EC:2.7.11.21; EC:2.7.11.22; EC:2.7.11.24; EC:2.7.11.25; EC:2.7.11.30; EC:2.7.12.1; EC:2.7.12.2
MAP3K11	ENSG00000173327	HMR_9577	[protein] + ATP -> ADP + phosphoprotein	EC:2.7.11.1; EC:2.7.11.8; EC:2.7.11.9; EC:2.7.11.10; EC:2.7.11.11; EC:2.7.11.12; EC:2.7.11.13; EC:2.7.11.17; EC:2.7.11.21; EC:2.7.11.22; EC:2.7.11.24; EC:2.7.11.25; EC:2.7.11.30; EC:2.7.12.1; EC:2.7.12.2
MAP3K7	ENSG00000135341	HMR_9577	[protein] + ATP -> ADP + phosphoprotein	EC:2.7.11.1; EC:2.7.11.8; EC:2.7.11.9; EC:2.7.11.10; EC:2.7.11.11; EC:2.7.11.12; EC:2.7.11.13; EC:2.7.11.17; EC:2.7.11.21; EC:2.7.11.22; EC:2.7.11.24; EC:2.7.11.25; EC:2.7.11.30; EC:2.7.12.1; EC:2.7.12.2
MAPK1	ENSG00000100030	HMR_9577	[protein] + ATP -> ADP + phosphoprotein	EC:2.7.11.1; EC:2.7.11.8; EC:2.7.11.9; EC:2.7.11.10; EC:2.7.11.11; EC:2.7.11.12; EC:2.7.11.13; EC:2.7.11.17; EC:2.7.11.21; EC:2.7.11.22; EC:2.7.11.24; EC:2.7.11.25; EC:2.7.11.30; EC:2.7.12.1; EC:2.7.12.2
MAPK14	ENSG00000112062	HMR_9577	[protein] + ATP -> ADP + phosphoprotein	EC:2.7.11.1; EC:2.7.11.8; EC:2.7.11.9; EC:2.7.11.10; EC:2.7.11.11; EC:2.7.11.12; EC:2.7.11.13; EC:2.7.11.17; EC:2.7.11.21; EC:2.7.11.22; EC:2.7.11.24; EC:2.7.11.25; EC:2.7.11.30; EC:2.7.12.1; EC:2.7.12.2
MAPKAPK5	ENSG00000089022	HMR_9577|HMR_9579	ATP + protamine -> ADP + O-phosphoprotamine|[protein] + ATP -> ADP + phosphoprotein	EC:2.7.11.1|EC:2.7.11.1; EC:2.7.11.8; EC:2.7.11.9; EC:2.7.11.10; EC:2.7.11.11; EC:2.7.11.12; EC:2.7.11.13; EC:2.7.11.17; EC:2.7.11.21; EC:2.7.11.22; EC:2.7.11.24; EC:2.7.11.25; EC:2.7.11.30; EC:2.7.12.1; EC:2.7.12.2
MARS	ENSG00000166986	HMR_5143|HMR_7620	ATP + methionine + tRNA(met) -> AMP + L-methionyl-tRNA(met) + PPi|ATP + selenomethionine + tRNA(met) -> AMP + PPi + selenomethio... <Preview truncated at 128 characters>	EC:6.1.1.10
MARS2	ENSG00000247626	HMR_7620	ATP + selenomethionine + tRNA(met) -> AMP + PPi + selenomethionyl-tRNA(met)	EC:6.1.1.10
MASTL	ENSG00000120539	HMR_9577|HMR_9579	ATP + protamine -> ADP + O-phosphoprotamine|[protein] + ATP -> ADP + phosphoprotein	EC:2.7.11.1|EC:2.7.11.1; EC:2.7.11.8; EC:2.7.11.9; EC:2.7.11.10; EC:2.7.11.11; EC:2.7.11.12; EC:2.7.11.13; EC:2.7.11.17; EC:2.7.11.21; EC:2.7.11.22; EC:2.7.11.24; EC:2.7.11.25; EC:2.7.11.30; EC:2.7.12.1; EC:2.7.12.2
MAT2A	ENSG00000168906	HMR_3875|HMR_7139	ATP + H2O + methionine -> Pi + PPi + SAM|ATP + H2O + selenomethionine <=> Pi + PPi + se-adenosylselenomethionine	EC:2.5.1.6
MECR	ENSG00000116353	HMR_2155|HMR_4591|r0309|r0633|r0638|r0652|r0735|r0791	(2E)-hexenoyl-CoA + H+ + NADPH <=> hexanoyl-CoA + NADP+|NAD+ + xylitol -> H+ + L-xylulose + NADH|NADP+ + octanoyl-CoA <=> (2E)-o... <Preview truncated at 128 characters>	1.3.1.38|EC:1.1.1.15|EC:2.1.3.85; EC:1.3.1.39
MED1	ENSG00000125686	HMR_0024	fatty acid-ligands + PPARA -> activation-ppara
MEPCE	ENSG00000146834	HMR_6710|HMR_6737	beta-carboline + SAM -> H+ + harman + SAH|salsolinol + SAM -> (R)-1,2-dimethyl-5,6-dihydroxy-tetrahydroisoquinoline + H+ + SAH	EC:2.1.1.-
METTL1	ENSG00000037897	HMR_9520	SAH + tRNA containing N7-methylguanine <=> SAM + tRNA-guanine	EC:2.1.1.33
METTL14	ENSG00000145388	HMR_6710|HMR_6737	beta-carboline + SAM -> H+ + harman + SAH|salsolinol + SAM -> (R)-1,2-dimethyl-5,6-dihydroxy-tetrahydroisoquinoline + H+ + SAH	EC:2.1.1.-
METTL16	ENSG00000127804	HMR_6710|HMR_6737	beta-carboline + SAM -> H+ + harman + SAH|salsolinol + SAM -> (R)-1,2-dimethyl-5,6-dihydroxy-tetrahydroisoquinoline + H+ + SAH	EC:2.1.1.-
METTL17	ENSG00000165792	HMR_6710|HMR_6737	beta-carboline + SAM -> H+ + harman + SAH|salsolinol + SAM -> (R)-1,2-dimethyl-5,6-dihydroxy-tetrahydroisoquinoline + H+ + SAH	EC:2.1.1.-
METTL3	ENSG00000165819	HMR_9511	H+ + m7G(5)pppm6Am (mRNA containing an N6,2-O-dimethyladenosine cap) + SAH <=> m7G(5)pppAm + SAM	EC:2.1.1.62
MGAT1	ENSG00000131446	HMR_7323	(alpha-D-mannosyl)4-beta-D-mannosyl-diacetylchitobiosyl-L-asparagine (protein) + UDP-N-acetylglucosamine -> H+ + nm4masn + UDP	EC:2.4.1.101
MGAT3	ENSG00000128268	HMR_7326	n2m2masn + UDP-N-acetylglucosamine -> H+ + n2m2nmasn + UDP	EC:2.4.1.144
MGEA5	ENSG00000198408	HMR_9495	CoA + H+ + histone-N6-acetyl-L-lysine <=> acetyl-CoA + histone-L-lysine	EC:2.3.1.48
MOGS	ENSG00000115275	HMR_7286	(alpha-D-Glucosyl)3-(alpha-D-mannosyl)8-beta-D-mannosyl-diacetylchitobiosyl-L-asparagine (protein) + H2O -> (alpha-D-Glucosyl)2-... <Preview truncated at 128 characters>	EC:3.2.1.106
MPI	ENSG00000178802	HMR_4383	fructose-6-phosphate <=> mannose-6-phosphate	EC:5.3.1.8
MTFMT	ENSG00000103707	HMR_5144	10-formyl-THF + L-methionyl-tRNA(met) -> N-formylmethionyl-tRNA + THF	EC:2.1.2.9
MTHFD1	ENSG00000100714	HMR_4338|HMR_4442|HMR_4444|HMR_4503|HMR_8144	10-formyl-THF + H+ <=> 5,10-methenyl-THF + H2O|5,10-methenyl-THF + NADH <=> 5,10-methylene-THF + NAD+|5,10-methenyl-THF + NADPH ... <Preview truncated at 128 characters>	EC:1.5.1.5|EC:3.5.4.9|EC:3.5.4.9; EC:6.3.4.3
MTHFD1L	ENSG00000120254	HMR_4340|HMR_4444|HMR_4505	10-formyl-THF + H+ <=> 5,10-methenyl-THF + H2O|5,10-methenyl-THF + NADPH <=> 5,10-methylene-THF + NADP+|ATP + formate + THF -> 1... <Preview truncated at 128 characters>	EC:1.5.1.5|EC:3.5.4.9|EC:3.5.4.9; EC:6.3.4.3
MTHFD2	ENSG00000065911	HMR_4340|HMR_4440|HMR_4444|HMR_4505	10-formyl-THF + H+ <=> 5,10-methenyl-THF + H2O|5,10-methenyl-THF + NADH <=> 5,10-methylene-THF + NAD+|5,10-methenyl-THF + NADPH ... <Preview truncated at 128 characters>	EC:1.5.1.15|EC:1.5.1.5|EC:3.5.4.9|EC:3.5.4.9; EC:6.3.4.3
MTPAP	ENSG00000107951	HMR_7161|HMR_7162	0.18 ADP + 0.3 CDP + 0.34 GDP + 0.18 UDP -> Pi + RNA|0.18 ATP + 0.3 CTP + 0.34 GTP + 0.18 UTP -> PPi + RNA	EC:2.7.7.6; EC:2.7.7.19; EC:2.7.7.52|EC:2.7.7.8
MTR	ENSG00000116984	HMR_3917|HMR_9575	5-methyl-THF + homocysteine -> H+ + methionine + THF|5-methyltetrahydropteroyltri-L-glutamate + selenohomocysteine -> selenometh... <Preview truncated at 128 characters>	EC:2.1.1.13
MVD	ENSG00000167508	DPMVDx|HMR_1451	(R)-5-diphosphomevalonate + ATP -> ADP + CO2 + isopentenyl-pPP + Pi|ATP + (R)-5-diphosphomevalonate -> ADP + CO2 + isopentenyl-p... <Preview truncated at 128 characters>	4.1.1.33|EC:4.1.1.33
MVK	ENSG00000110921	HMR_1445|MEVK1x	(R)-mevalonate + ATP -> (R)-5-phosphomevalonate + ADP + H+|(R)-mevalonate + ATP -> ADP + H+ + (R)-5-phosphomevalonate	2.7.1.36|EC:2.7.1.36
MYBBP1A	ENSG00000132382	HMR_7160	0.3 dATP + 0.2 dCTP + 0.2 dGTP + 0.3 dTTP -> DNA + PPi	EC:2.7.7.7
N6AMT1	ENSG00000156239	HMR_6710|HMR_6737	beta-carboline + SAM -> H+ + harman + SAH|salsolinol + SAM -> (R)-1,2-dimethyl-5,6-dihydroxy-tetrahydroisoquinoline + H+ + SAH	EC:2.1.1.-
NAA10	ENSG00000102030	HMR_1088|HMR_1091|HMR_4426	CoA + H+ + N-acetyl-LTE4 <=> acetyl-CoA + leukotriene E4|acetylcarnosine + CoA + H+ <=> acetyl-CoA + carnosine	EC:2.3.1.-|EC:2.3.1.88
NAA15	ENSG00000164134	HMR_4426	acetylcarnosine + CoA + H+ <=> acetyl-CoA + carnosine	EC:2.3.1.88
NAA30	ENSG00000139977	HMR_4426	acetylcarnosine + CoA + H+ <=> acetyl-CoA + carnosine	EC:2.3.1.88
NAA50	ENSG00000121579	HMR_1088|HMR_1091	CoA + H+ + N-acetyl-LTE4 <=> acetyl-CoA + leukotriene E4	EC:2.3.1.-
NADK	ENSG00000008130	HMR_4268|HMR_4269|HMR_4279	ATP + NAD+ -> ADP + H+ + NADP+	EC:2.7.1.23
NAE1	ENSG00000159593	HMR_0190|HMR_3955|HMR_5406|HMR_5407	ATP + H2O + lauric acid -> ADP + H+ + lauric acid + Pi|CO2 + H2O -> H+ + HCO3-|CO2 + H2O <=> carbonate	EC:4.2.1.1|TCDB:3.A.1.211.1
NAMPT	ENSG00000105835	HMR_4262	nicotinamide D-ribonucleotide + PPi <=> H+ + nicotinamide + PRPP	EC:2.4.2.12
NARS	ENSG00000134440	HMR_5133	asparagine + ATP + tRNA(asn) -> AMP + L-asparaginyl-tRNA(asn) + PPi	EC:6.1.1.22
NAT10	ENSG00000135372	HMR_1088|HMR_1091	CoA + H+ + N-acetyl-LTE4 <=> acetyl-CoA + leukotriene E4	EC:2.3.1.-
NCOA2	ENSG00000140396	HMR_0024	fatty acid-ligands + PPARA -> activation-ppara
NCOA3	ENSG00000124151	HMR_0024|HMR_9495	CoA + H+ + histone-N6-acetyl-L-lysine <=> acetyl-CoA + histone-L-lysine|fatty acid-ligands + PPARA -> activation-ppara	EC:2.3.1.48
NCOR1	ENSG00000141027	HMR_0024	fatty acid-ligands + PPARA -> activation-ppara
NCOR2	ENSG00000196498	HMR_0024	fatty acid-ligands + PPARA -> activation-ppara
NDC1	ENSG00000058804	HMR_8639	DNA <=> DNA
NDUFA1	ENSG00000125356	HMR_6921	5 H+ + NADH + ubiquinone -> NAD+ + ubiquinol + 4 H+	EC:1.6.5.3
NDUFA10	ENSG00000130414	HMR_6921	5 H+ + NADH + ubiquinone -> NAD+ + ubiquinol + 4 H+	EC:1.6.5.3
NDUFA11	ENSG00000174886	HMR_6921	5 H+ + NADH + ubiquinone -> NAD+ + ubiquinol + 4 H+	EC:1.6.5.3
NDUFA13	ENSG00000186010	HMR_6921	5 H+ + NADH + ubiquinone -> NAD+ + ubiquinol + 4 H+	EC:1.6.5.3
NDUFA2	ENSG00000131495	HMR_6921	5 H+ + NADH + ubiquinone -> NAD+ + ubiquinol + 4 H+	EC:1.6.5.3
NDUFA8	ENSG00000119421	HMR_6921	5 H+ + NADH + ubiquinone -> NAD+ + ubiquinol + 4 H+	EC:1.6.5.3
NDUFAB1	ENSG00000004779	HMR_6921	5 H+ + NADH + ubiquinone -> NAD+ + ubiquinol + 4 H+	EC:1.6.5.3
NDUFAF5	ENSG00000101247	HMR_6710|HMR_6737	beta-carboline + SAM -> H+ + harman + SAH|salsolinol + SAM -> (R)-1,2-dimethyl-5,6-dihydroxy-tetrahydroisoquinoline + H+ + SAH	EC:2.1.1.-
NDUFB10	ENSG00000140990	HMR_6921	5 H+ + NADH + ubiquinone -> NAD+ + ubiquinol + 4 H+	EC:1.6.5.3
NDUFB11	ENSG00000147123	HMR_6921	5 H+ + NADH + ubiquinone -> NAD+ + ubiquinol + 4 H+	EC:1.6.5.3
NDUFB4	ENSG00000065518	HMR_6921	5 H+ + NADH + ubiquinone -> NAD+ + ubiquinol + 4 H+	EC:1.6.5.3
NDUFB6	ENSG00000165264	HMR_6921	5 H+ + NADH + ubiquinone -> NAD+ + ubiquinol + 4 H+	EC:1.6.5.3
NDUFB7	ENSG00000099795	HMR_6921	5 H+ + NADH + ubiquinone -> NAD+ + ubiquinol + 4 H+	EC:1.6.5.3
NDUFB8	ENSG00000166136	HMR_6921	5 H+ + NADH + ubiquinone -> NAD+ + ubiquinol + 4 H+	EC:1.6.5.3
NDUFB9	ENSG00000147684	HMR_6921	5 H+ + NADH + ubiquinone -> NAD+ + ubiquinol + 4 H+	EC:1.6.5.3
NDUFC1	ENSG00000109390	HMR_6921	5 H+ + NADH + ubiquinone -> NAD+ + ubiquinol + 4 H+	EC:1.6.5.3
NDUFS1	ENSG00000023228	HMR_6921	5 H+ + NADH + ubiquinone -> NAD+ + ubiquinol + 4 H+	EC:1.6.5.3
NDUFS2	ENSG00000158864	HMR_6921	5 H+ + NADH + ubiquinone -> NAD+ + ubiquinol + 4 H+	EC:1.6.5.3
NDUFS7	ENSG00000115286	HMR_6921	5 H+ + NADH + ubiquinone -> NAD+ + ubiquinol + 4 H+	EC:1.6.5.3
NDUFS8	ENSG00000110717	HMR_6921	5 H+ + NADH + ubiquinone -> NAD+ + ubiquinol + 4 H+	EC:1.6.5.3
NDUFV1	ENSG00000167792	HMR_6921	5 H+ + NADH + ubiquinone -> NAD+ + ubiquinol + 4 H+	EC:1.6.5.3
NMNAT1	ENSG00000173614	HMR_4257|HMR_4267|HMR_4276|HMR_8790	ATP + H+ + nicotinamide D-ribonucleotide -> NAD+ + PPi|ATP + H+ + nicotinate ribonucleotide <=> deamido-NAD + PPi	EC:2.7.7.1|EC:2.7.7.1; EC:2.7.7.18
NMT1	ENSG00000136448	HMR_9512	CoA + N-tetradecanoylglycylpeptide <=> glycylpeptide + myristoyl-CoA	EC:2.3.1.97
NOL9	ENSG00000162408	HMR_4182|HMR_4317|HMR_4318|HMR_4320|HMR_9466|HMR_9467	1-deoxy-1-(N6-lysino)-D-fructose + ATP <=> ADP + fructoselysine-3-phosphate + H+|ADP + fructoseglycine-ketone-3-phosphate + H+ <... <Preview truncated at 128 characters>	EC:2.7.1.-
NOP2	ENSG00000111641	HMR_6710|HMR_6737	beta-carboline + SAM -> H+ + harman + SAH|salsolinol + SAM -> (R)-1,2-dimethyl-5,6-dihydroxy-tetrahydroisoquinoline + H+ + SAH	EC:2.1.1.-
NPEPPS	ENSG00000141279	HMR_4328|HMR_4329	cys-gly + H2O -> cysteine + glycine	EC:3.4.11.1; EC:3.4.11.2
NRF1	ENSG00000106459	HMR_9491	[protein]-L-lysine + ATP + ubiquitin -> [protein]-N-ubiquityllysine + AMP + PPi	EC:6.3.2.19
NSUN4	ENSG00000117481	HMR_6710|HMR_6737	beta-carboline + SAM -> H+ + harman + SAH|salsolinol + SAM -> (R)-1,2-dimethyl-5,6-dihydroxy-tetrahydroisoquinoline + H+ + SAH	EC:2.1.1.-
NSUN5	ENSG00000130305	HMR_6710|HMR_6737	beta-carboline + SAM -> H+ + harman + SAH|salsolinol + SAM -> (R)-1,2-dimethyl-5,6-dihydroxy-tetrahydroisoquinoline + H+ + SAH	EC:2.1.1.-
NUDT4	ENSG00000173598	HMR_7655|HMR_9552	5-pp-inspP5 + H2O -> H+ + myo-inositol-hexakisphosphate + Pi|diphospho-myo-inositol-polyphosphate + H2O -> H+ + myo-inositol-pol... <Preview truncated at 128 characters>	EC:3.6.1.52
NUP107	ENSG00000111581	HMR_7796|HMR_8639	DNA <=> DNA|UTP <=> UTP
NUP133	ENSG00000069248	HMR_7796|HMR_8639	DNA <=> DNA|UTP <=> UTP
NUP155	ENSG00000113569	HMR_7796|HMR_8639	DNA <=> DNA|UTP <=> UTP
NUP160	ENSG00000030066	HMR_7796|HMR_8639	DNA <=> DNA|UTP <=> UTP
NUP188	ENSG00000095319	HMR_7796|HMR_8639	DNA <=> DNA|UTP <=> UTP
NUP205	ENSG00000155561	HMR_7796|HMR_8639	DNA <=> DNA|UTP <=> UTP
NUP214	ENSG00000126883	HMR_7796|HMR_8639	DNA <=> DNA|UTP <=> UTP
NUP43	ENSG00000120253	HMR_7796|HMR_8639	DNA <=> DNA|UTP <=> UTP
NUP54	ENSG00000138750	HMR_7796|HMR_8639	DNA <=> DNA|UTP <=> UTP
NUP62	ENSG00000213024	HMR_7796|HMR_8639	DNA <=> DNA|UTP <=> UTP
NUP85	ENSG00000125450	HMR_7796|HMR_8639	DNA <=> DNA|UTP <=> UTP
NUP88	ENSG00000108559	HMR_7796|HMR_8639	DNA <=> DNA|UTP <=> UTP
NUP93	ENSG00000102900	HMR_7796|HMR_8639	DNA <=> DNA|UTP <=> UTP
NUP98	ENSG00000110713	HMR_7796|HMR_8639	DNA <=> DNA|UTP <=> UTP
OGDH	ENSG00000105953	HMR_4209|HMR_4239|HMR_4599|HMR_5297|HMR_6411|HMR_6413	2-oxoadipate + CoA + NAD+ -> CO2 + glutaryl-CoA + NADH|2-oxoadipate + H+ + lipoamide -> CO2 + S-glutaryldihydrolipoamide|3-carbo... <Preview truncated at 128 characters>	EC:1.2.4.2
OGT	ENSG00000147162	HMR_0765|HMR_0924|HMR_0925|HMR_0926	D-galactosyl-N-acylsphingosine + UDP-galactose -> digalactosylceramide + H+ + UDP|glucosylceramide pool + UDP-galactose -> H+ + ... <Preview truncated at 128 characters>	EC:2.4.1.-
OTUD5	ENSG00000068308	HMR_9490	H2O + ubiquitin C terminal thiolester -> H+ + thiol + ubiquitin	EC:3.1.2.15
OXSM	ENSG00000151093	HMR_0158|HMR_2152|HMR_2156|HMR_2160|HMR_2164|HMR_2168|HMR_2173|HMR_2178|RE1447M|r1313	H+ + hexadecanoyl-[ACP] + malonyl-[ACP] -> [ACP] + CO2 + 3-Oxostearoyl-ACP|H+ + hexanoyl-[ACP] + malonyl-[ACP] -> [ACP] + 3-oxoo... <Preview truncated at 128 characters>	EC:2.3.1.85; EC:2.3.1.179|EC:2.3.1.85; EC:2.3.1.41; EC:2.3.1.179
PAFAH1B1	ENSG00000007168	HMR_7611|HMR_8518	2-acetyl-1-alkyl-sn-glycero-3-phosphocholine + H2O -> 1-alkyl-2-lysoglycerol-3-phosphocholine + acetate + H+|2-acetyl-1-alkyl-sn... <Preview truncated at 128 characters>	EC:3.1.1.47
PAICS	ENSG00000128050	HMR_4804|HMR_4810	5-phosphoribosyl-4-carboxy-5-aminoimidazole + H+ <=> AIR + CO2|5-phosphoribosyl-4-carboxy-5-aminoimidazole + aspartate + ATP -> ... <Preview truncated at 128 characters>	EC:4.1.1.21|EC:6.3.2.6
PANK3	ENSG00000120137	HMR_4714|HMR_4715|HMR_4718|HMR_4730|HMR_4731	(R)-4-phosphopantothenoyl-cysteine + ADP + H+ <=> ATP + N-pantothenoylcysteine|ATP + pantetheine -> ADP + H+ + phosphopantethein... <Preview truncated at 128 characters>	EC:2.7.1.33|EC:2.7.1.33; EC:2.7.1.34
PAPOLG	ENSG00000115421	HMR_7161|HMR_7162	0.18 ADP + 0.3 CDP + 0.34 GDP + 0.18 UDP -> Pi + RNA|0.18 ATP + 0.3 CTP + 0.34 GTP + 0.18 UTP -> PPi + RNA	EC:2.7.7.6; EC:2.7.7.19; EC:2.7.7.52|EC:2.7.7.8
PCYT1A	ENSG00000161217	HMR_0638|HMR_9559	CTP + H+ + N-trimethyl-2-aminoethylphosphonate -> CMP-N-trimethyl-2-aminoethylphosphonate + PPi|CTP + H+ + phosphocholine -> CDP... <Preview truncated at 128 characters>	EC:2.7.7.15
PCYT2	ENSG00000185813	HMR_0651|HMR_9560	2-aminoethylphosphonate + CTP + H+ -> CMP-2-aminoethylphosphonate + PPi|CTP + ethanolamine-phosphate + H+ -> CDP-ethanolamine + ... <Preview truncated at 128 characters>	EC:2.7.7.14
PDE1B	ENSG00000123360	HMR_4014|HMR_4048|HMR_8083|HMR_8085|HMR_8087	cAMP + H2O -> AMP + H+|cGMP + H2O -> GMP + H+	EC:3.1.4.17|EC:3.1.4.17; EC:3.1.4.35|EC:3.1.4.35
PDE4A	ENSG00000065989	HMR_4014|HMR_4048|HMR_8083|HMR_8085|HMR_8087	cAMP + H2O -> AMP + H+|cGMP + H2O -> GMP + H+	EC:3.1.4.17|EC:3.1.4.17; EC:3.1.4.35|EC:3.1.4.35
PDHA1	ENSG00000131828	HMR_4137|HMR_6410|HMR_6412|HMR_8746	CoA + NAD+ + pyruvate -> acetyl-CoA + CO2 + NADH|CoA + S-acetyldihydrolipoamide -> acetyl-CoA + dihydrolipoamide|H+ + lipoamide ... <Preview truncated at 128 characters>	EC:1.2.4.1|EC:1.2.4.1; EC:2.3.1.12; EC:1.8.1.4; EC:1.2.1.51|EC:2.3.1.12
PDIA3	ENSG00000167004	HMR_9806	2 GSH + insulin-(SS) -> GSSG + Insulin-(SH)2	EC:5.3.4.1
PDSS1	ENSG00000148459	HMR_6901	farnesyl-PP + 7 isopentenyl-pPP -> all-trans-decaprenyl-diphosphate + 7 PPi	EC:2.5.1.91
PDSS2	ENSG00000164494	HMR_6901	farnesyl-PP + 7 isopentenyl-pPP -> all-trans-decaprenyl-diphosphate + 7 PPi	EC:2.5.1.91
PDXK	ENSG00000160209	HMR_4065|HMR_4066|HMR_4068	ATP + pyridoxal -> ADP + H+ + pyridoxal-phosphate|ATP + pyridoxamine -> ADP + H+ + pyridoxamine-phosphate|ATP + pyridoxine -> AD... <Preview truncated at 128 characters>	EC:2.7.1.35
PFAS	ENSG00000178921	HMR_4808	ATP + glutamine + H2O + N-formyl-GAR -> 5-phosphoribosylformylglycinamidine + ADP + glutamate + H+ + Pi	EC:6.3.5.3
PGAM1	ENSG00000171314	HMR_4365|HMR_4371	1,3-bisphospho-D-glycerate -> 2,3-bisphospho-D-glycerate + H+|2-phospho-D-glycerate <=> 3-phospho-D-glycerate	EC:5.4.2.11|EC:5.4.2.1; EC:5.4.2.4
PGD	ENSG00000142657	GNDc|HMR_4473|HMR_4474	3 6-phospho-D-gluconate + 3 NADP+ -> 3 CO2 + 3 NADPH + 3 ribulose-5-phosphate|6-phospho-D-gluconate + NADP+ -> CO2 + NADPH + rib... <Preview truncated at 128 characters>	1.1.1.44|EC:1.1.1.44
PGK1	ENSG00000102144	HMR_4368	1,3-bisphospho-D-glycerate + ADP <=> 3-phospho-D-glycerate + ATP	EC:2.7.2.3
PGM3	ENSG00000013375	HMR_4631	N-acetylglucosamine-6-phosphate -> N-acetylglucosamine-1-phosphate	EC:5.4.2.3
PGP	ENSG00000184207	HMR_9558	2-phosphoglycolate + H2O -> glycolate + Pi	EC:3.1.3.18
PGS1	ENSG00000087157	HMR_0582|PGPPT	CDP-diacylglycerol-CL pool + sn-glycerol-3-phosphate -> CMP + H+ + PGP-CL pool|sn-glycerol-3-phosphate + CDP-diacylglycerol-CL p... <Preview truncated at 128 characters>	2.7.8.11|EC:2.7.8.5
PHGDH	ENSG00000092621	HMR_0719|HMR_3839	3-phospho-D-glycerate + NAD+ <=> 3-phosphonooxypyruvate + H+ + NADH|AKG + H+ + NADH -> 2-hydroxyglutarate + NAD+	EC:1.1.1.95
PI4KA	ENSG00000241973	HMR_6546|HMR_8830|RE2972G|RE2972M|RE2972R	1-phosphatidyl-1D-myo-inositol-5-phosphate + ATP -> ADP + H+ + phosphatidylinositol-4,5-bisphosphate|ATP + 1-phosphatidyl-1D-myo... <Preview truncated at 128 characters>	EC:2.7.1.67
PI4KB	ENSG00000143393	HMR_6546|HMR_8830|RE2972G|RE2972M|RE2972R	1-phosphatidyl-1D-myo-inositol-5-phosphate + ATP -> ADP + H+ + phosphatidylinositol-4,5-bisphosphate|ATP + 1-phosphatidyl-1D-myo... <Preview truncated at 128 characters>	EC:2.7.1.67
PIGS	ENSG00000087111	HMR_8402|HMR_8404|HMR_8406|HMR_8407|M4ATAer	em2emgacpail heparan sulfate + glycophosphatidylinositol-(GPI)-anchored-protein-precursor -> em2emgacpail_prot heparan sulfate +... <Preview truncated at 128 characters>
PIK3C3	ENSG00000078142	HMR_6542|HMR_6587|HMR_6588|HMR_6589|HMR_8824|HMR_8829	1-phosphatidyl-1D-myo-inositol-5-phosphate + ATP -> 1-phosphatidyl-myo-inositol-3,5-bisphosphate + ADP + H+|1-phosphatidyl-1D-my... <Preview truncated at 128 characters>	EC:2.7.1.137
PIK3CD	ENSG00000171608	HMR_6555|HMR_8816	ATP + phosphatidylinositol-4,5-bisphosphate -> ADP + H+ + phosphatidylinositol-3,4,5-trisphosphate	EC:2.7.1.153
PIM1	ENSG00000137193	HMR_9577|HMR_9579	ATP + protamine -> ADP + O-phosphoprotamine|[protein] + ATP -> ADP + phosphoprotein	EC:2.7.11.1|EC:2.7.11.1; EC:2.7.11.8; EC:2.7.11.9; EC:2.7.11.10; EC:2.7.11.11; EC:2.7.11.12; EC:2.7.11.13; EC:2.7.11.17; EC:2.7.11.21; EC:2.7.11.22; EC:2.7.11.24; EC:2.7.11.25; EC:2.7.11.30; EC:2.7.12.1; EC:2.7.12.2
PIM2	ENSG00000102096	HMR_9577|HMR_9579	ATP + protamine -> ADP + O-phosphoprotamine|[protein] + ATP -> ADP + phosphoprotein	EC:2.7.11.1|EC:2.7.11.1; EC:2.7.11.8; EC:2.7.11.9; EC:2.7.11.10; EC:2.7.11.11; EC:2.7.11.12; EC:2.7.11.13; EC:2.7.11.17; EC:2.7.11.21; EC:2.7.11.22; EC:2.7.11.24; EC:2.7.11.25; EC:2.7.11.30; EC:2.7.12.1; EC:2.7.12.2
PISD	ENSG00000241878	HMR_0616|HMR_0627|PSDm_hs	CO2 + PE-PS-LD pool -> H+ + PS-LD pool|H+ + PS-LD pool -> CO2 + PE-LD pool	4.1.1.65|EC:4.1.1.65
PKM	ENSG00000067225	HMR_4171|HMR_4193|HMR_4210|HMR_4358|HMR_4421|HMR_4573|HMR_6627	ADP + H+ + PEP -> ATP + pyruvate|CDP + H+ + PEP -> CTP + pyruvate|GDP + H+ + PEP -> GTP + pyruvate|H+ + PEP + UDP -> pyruvate + ... <Preview truncated at 128 characters>	EC:2.7.1.40
PKMYT1	ENSG00000127564	HMR_9577|HMR_9579	ATP + protamine -> ADP + O-phosphoprotamine|[protein] + ATP -> ADP + phosphoprotein	EC:2.7.11.1|EC:2.7.11.1; EC:2.7.11.8; EC:2.7.11.9; EC:2.7.11.10; EC:2.7.11.11; EC:2.7.11.12; EC:2.7.11.13; EC:2.7.11.17; EC:2.7.11.21; EC:2.7.11.22; EC:2.7.11.24; EC:2.7.11.25; EC:2.7.11.30; EC:2.7.12.1; EC:2.7.12.2
PLCB3	ENSG00000149782	HMR_0663|HMR_6559|HMR_8818|HMR_8822	1-phosphatidyl-1D-myo-inositol-4-phosphate + H2O -> 1,2-diacylglycerol-LD-PI pool + 1D-myo-inositol-1,4-bisphosphate + H+|H2O + ... <Preview truncated at 128 characters>	EC:3.1.4.11
PLK1	ENSG00000166851	HMR_9577	[protein] + ATP -> ADP + phosphoprotein	EC:2.7.11.1; EC:2.7.11.8; EC:2.7.11.9; EC:2.7.11.10; EC:2.7.11.11; EC:2.7.11.12; EC:2.7.11.13; EC:2.7.11.17; EC:2.7.11.21; EC:2.7.11.22; EC:2.7.11.24; EC:2.7.11.25; EC:2.7.11.30; EC:2.7.12.1; EC:2.7.12.2
PLK4	ENSG00000142731	HMR_9577	[protein] + ATP -> ADP + phosphoprotein	EC:2.7.11.1; EC:2.7.11.8; EC:2.7.11.9; EC:2.7.11.10; EC:2.7.11.11; EC:2.7.11.12; EC:2.7.11.13; EC:2.7.11.17; EC:2.7.11.21; EC:2.7.11.22; EC:2.7.11.24; EC:2.7.11.25; EC:2.7.11.30; EC:2.7.12.1; EC:2.7.12.2
PMM2	ENSG00000140650	HMR_4385	mannose-6-phosphate -> mannose-1-phosphate	EC:5.4.2.8
PMPCA	ENSG00000165688	HMR_6545|HMR_6547|HMR_6557|HMR_6591	1-phosphatidyl-1D-myo-inositol-4-phosphate + H2O -> PI pool + Pi|1-phosphatidyl-myo-inositol-3,5-bisphosphate + H2O -> 1-phospha... <Preview truncated at 128 characters>	EC:3.1.3.-
PMVK	ENSG00000163344	HMR_1448|PMEVKx	(R)-5-diphosphomevalonate + ADP <=> (R)-5-phosphomevalonate + ATP|ATP + (R)-5-phosphomevalonate -> ADP + (R)-5-diphosphomevalona... <Preview truncated at 128 characters>	2.7.4.2|EC:2.7.4.2
PNKP	ENSG00000039650	HMR_9506	3-phosphopolynucleotide + H2O -> Pi + polynucleotide	EC:3.1.3.32
POLA1	ENSG00000101868	HMR_7160	0.3 dATP + 0.2 dCTP + 0.2 dGTP + 0.3 dTTP -> DNA + PPi	EC:2.7.7.7
POLA2	ENSG00000014138	HMR_7160	0.3 dATP + 0.2 dCTP + 0.2 dGTP + 0.3 dTTP -> DNA + PPi	EC:2.7.7.7
POLD1	ENSG00000062822	HMR_7160	0.3 dATP + 0.2 dCTP + 0.2 dGTP + 0.3 dTTP -> DNA + PPi	EC:2.7.7.7
POLD2	ENSG00000106628	HMR_7160	0.3 dATP + 0.2 dCTP + 0.2 dGTP + 0.3 dTTP -> DNA + PPi	EC:2.7.7.7
POLD3	ENSG00000077514	HMR_7160	0.3 dATP + 0.2 dCTP + 0.2 dGTP + 0.3 dTTP -> DNA + PPi	EC:2.7.7.7
POLE	ENSG00000177084	HMR_7160	0.3 dATP + 0.2 dCTP + 0.2 dGTP + 0.3 dTTP -> DNA + PPi	EC:2.7.7.7
POLE2	ENSG00000100479	HMR_7160	0.3 dATP + 0.2 dCTP + 0.2 dGTP + 0.3 dTTP -> DNA + PPi	EC:2.7.7.7
POLG	ENSG00000140521	HMR_7160	0.3 dATP + 0.2 dCTP + 0.2 dGTP + 0.3 dTTP -> DNA + PPi	EC:2.7.7.7
POLG2	ENSG00000256525	HMR_7160	0.3 dATP + 0.2 dCTP + 0.2 dGTP + 0.3 dTTP -> DNA + PPi	EC:2.7.7.7
POLQ	ENSG00000051341	HMR_7160	0.3 dATP + 0.2 dCTP + 0.2 dGTP + 0.3 dTTP -> DNA + PPi	EC:2.7.7.7
POLR1A	ENSG00000068654	HMR_7161|HMR_7162	0.18 ADP + 0.3 CDP + 0.34 GDP + 0.18 UDP -> Pi + RNA|0.18 ATP + 0.3 CTP + 0.34 GTP + 0.18 UTP -> PPi + RNA	EC:2.7.7.6; EC:2.7.7.19; EC:2.7.7.52|EC:2.7.7.8
POLR1B	ENSG00000125630	HMR_7161|HMR_7162	0.18 ADP + 0.3 CDP + 0.34 GDP + 0.18 UDP -> Pi + RNA|0.18 ATP + 0.3 CTP + 0.34 GTP + 0.18 UTP -> PPi + RNA	EC:2.7.7.6; EC:2.7.7.19; EC:2.7.7.52|EC:2.7.7.8
POLR1C	ENSG00000171453	HMR_7161|HMR_7162	0.18 ADP + 0.3 CDP + 0.34 GDP + 0.18 UDP -> Pi + RNA|0.18 ATP + 0.3 CTP + 0.34 GTP + 0.18 UTP -> PPi + RNA	EC:2.7.7.6; EC:2.7.7.19; EC:2.7.7.52|EC:2.7.7.8
POLR1E	ENSG00000137054	HMR_7161|HMR_7162	0.18 ADP + 0.3 CDP + 0.34 GDP + 0.18 UDP -> Pi + RNA|0.18 ATP + 0.3 CTP + 0.34 GTP + 0.18 UTP -> PPi + RNA	EC:2.7.7.6; EC:2.7.7.19; EC:2.7.7.52|EC:2.7.7.8
POLR2A	ENSG00000181222	HMR_7161|HMR_7162	0.18 ADP + 0.3 CDP + 0.34 GDP + 0.18 UDP -> Pi + RNA|0.18 ATP + 0.3 CTP + 0.34 GTP + 0.18 UTP -> PPi + RNA	EC:2.7.7.6; EC:2.7.7.19; EC:2.7.7.52|EC:2.7.7.8
POLR2B	ENSG00000047315	HMR_7161|HMR_7162	0.18 ADP + 0.3 CDP + 0.34 GDP + 0.18 UDP -> Pi + RNA|0.18 ATP + 0.3 CTP + 0.34 GTP + 0.18 UTP -> PPi + RNA	EC:2.7.7.6; EC:2.7.7.19; EC:2.7.7.52|EC:2.7.7.8
POLR2C	ENSG00000102978	HMR_7161|HMR_7162	0.18 ADP + 0.3 CDP + 0.34 GDP + 0.18 UDP -> Pi + RNA|0.18 ATP + 0.3 CTP + 0.34 GTP + 0.18 UTP -> PPi + RNA	EC:2.7.7.6; EC:2.7.7.19; EC:2.7.7.52|EC:2.7.7.8
POLR2D	ENSG00000144231	HMR_7161|HMR_7162	0.18 ADP + 0.3 CDP + 0.34 GDP + 0.18 UDP -> Pi + RNA|0.18 ATP + 0.3 CTP + 0.34 GTP + 0.18 UTP -> PPi + RNA	EC:2.7.7.6; EC:2.7.7.19; EC:2.7.7.52|EC:2.7.7.8
POLR2E	ENSG00000099817	HMR_7161|HMR_7162	0.18 ADP + 0.3 CDP + 0.34 GDP + 0.18 UDP -> Pi + RNA|0.18 ATP + 0.3 CTP + 0.34 GTP + 0.18 UTP -> PPi + RNA	EC:2.7.7.6; EC:2.7.7.19; EC:2.7.7.52|EC:2.7.7.8
POLR2F	ENSG00000100142	HMR_7161|HMR_7162	0.18 ADP + 0.3 CDP + 0.34 GDP + 0.18 UDP -> Pi + RNA|0.18 ATP + 0.3 CTP + 0.34 GTP + 0.18 UTP -> PPi + RNA	EC:2.7.7.6; EC:2.7.7.19; EC:2.7.7.52|EC:2.7.7.8
POLR2G	ENSG00000168002	HMR_7161|HMR_7162	0.18 ADP + 0.3 CDP + 0.34 GDP + 0.18 UDP -> Pi + RNA|0.18 ATP + 0.3 CTP + 0.34 GTP + 0.18 UTP -> PPi + RNA	EC:2.7.7.6; EC:2.7.7.19; EC:2.7.7.52|EC:2.7.7.8
POLR2H	ENSG00000163882	HMR_7161|HMR_7162	0.18 ADP + 0.3 CDP + 0.34 GDP + 0.18 UDP -> Pi + RNA|0.18 ATP + 0.3 CTP + 0.34 GTP + 0.18 UTP -> PPi + RNA	EC:2.7.7.6; EC:2.7.7.19; EC:2.7.7.52|EC:2.7.7.8
POLR2I	ENSG00000105258	HMR_7161|HMR_7162	0.18 ADP + 0.3 CDP + 0.34 GDP + 0.18 UDP -> Pi + RNA|0.18 ATP + 0.3 CTP + 0.34 GTP + 0.18 UTP -> PPi + RNA	EC:2.7.7.6; EC:2.7.7.19; EC:2.7.7.52|EC:2.7.7.8
POLR2J	ENSG00000005075	HMR_7161|HMR_7162	0.18 ADP + 0.3 CDP + 0.34 GDP + 0.18 UDP -> Pi + RNA|0.18 ATP + 0.3 CTP + 0.34 GTP + 0.18 UTP -> PPi + RNA	EC:2.7.7.6; EC:2.7.7.19; EC:2.7.7.52|EC:2.7.7.8
POLR2L	ENSG00000177700	HMR_7161|HMR_7162	0.18 ADP + 0.3 CDP + 0.34 GDP + 0.18 UDP -> Pi + RNA|0.18 ATP + 0.3 CTP + 0.34 GTP + 0.18 UTP -> PPi + RNA	EC:2.7.7.6; EC:2.7.7.19; EC:2.7.7.52|EC:2.7.7.8
POLR3A	ENSG00000148606	HMR_7161|HMR_7162	0.18 ADP + 0.3 CDP + 0.34 GDP + 0.18 UDP -> Pi + RNA|0.18 ATP + 0.3 CTP + 0.34 GTP + 0.18 UTP -> PPi + RNA	EC:2.7.7.6; EC:2.7.7.19; EC:2.7.7.52|EC:2.7.7.8
POLR3B	ENSG00000013503	HMR_7161|HMR_7162	0.18 ADP + 0.3 CDP + 0.34 GDP + 0.18 UDP -> Pi + RNA|0.18 ATP + 0.3 CTP + 0.34 GTP + 0.18 UTP -> PPi + RNA	EC:2.7.7.6; EC:2.7.7.19; EC:2.7.7.52|EC:2.7.7.8
POLR3C	ENSG00000186141	HMR_7161|HMR_7162	0.18 ADP + 0.3 CDP + 0.34 GDP + 0.18 UDP -> Pi + RNA|0.18 ATP + 0.3 CTP + 0.34 GTP + 0.18 UTP -> PPi + RNA	EC:2.7.7.6; EC:2.7.7.19; EC:2.7.7.52|EC:2.7.7.8
POLR3D	ENSG00000168495	HMR_7161|HMR_7162	0.18 ADP + 0.3 CDP + 0.34 GDP + 0.18 UDP -> Pi + RNA|0.18 ATP + 0.3 CTP + 0.34 GTP + 0.18 UTP -> PPi + RNA	EC:2.7.7.6; EC:2.7.7.19; EC:2.7.7.52|EC:2.7.7.8
POLR3E	ENSG00000058600	HMR_7161|HMR_7162	0.18 ADP + 0.3 CDP + 0.34 GDP + 0.18 UDP -> Pi + RNA|0.18 ATP + 0.3 CTP + 0.34 GTP + 0.18 UTP -> PPi + RNA	EC:2.7.7.6; EC:2.7.7.19; EC:2.7.7.52|EC:2.7.7.8
POLR3F	ENSG00000132664	HMR_7161|HMR_7162	0.18 ADP + 0.3 CDP + 0.34 GDP + 0.18 UDP -> Pi + RNA|0.18 ATP + 0.3 CTP + 0.34 GTP + 0.18 UTP -> PPi + RNA	EC:2.7.7.6; EC:2.7.7.19; EC:2.7.7.52|EC:2.7.7.8
POLR3H	ENSG00000100413	HMR_4385|HMR_7161|HMR_7162	0.18 ADP + 0.3 CDP + 0.34 GDP + 0.18 UDP -> Pi + RNA|0.18 ATP + 0.3 CTP + 0.34 GTP + 0.18 UTP -> PPi + RNA|mannose-6-phosphate -... <Preview truncated at 128 characters>	EC:2.7.7.6; EC:2.7.7.19; EC:2.7.7.52|EC:2.7.7.8|EC:5.4.2.8
POLR3K	ENSG00000161980	HMR_7161|HMR_7162	0.18 ADP + 0.3 CDP + 0.34 GDP + 0.18 UDP -> Pi + RNA|0.18 ATP + 0.3 CTP + 0.34 GTP + 0.18 UTP -> PPi + RNA	EC:2.7.7.6; EC:2.7.7.19; EC:2.7.7.52|EC:2.7.7.8
POLRMT	ENSG00000099821	HMR_7161|HMR_7162	0.18 ADP + 0.3 CDP + 0.34 GDP + 0.18 UDP -> Pi + RNA|0.18 ATP + 0.3 CTP + 0.34 GTP + 0.18 UTP -> PPi + RNA	EC:2.7.7.6; EC:2.7.7.19; EC:2.7.7.52|EC:2.7.7.8
PPA1	ENSG00000180817	HMR_3975|HMR_3977|HMR_3979|HMR_6912|HMR_7794	H2O + PPi -> H+ + 2 Pi	EC:3.6.1.1
PPA2	ENSG00000138777	HMR_3975|HMR_3977|HMR_3979|HMR_6912|HMR_7794	H2O + PPi -> H+ + 2 Pi	EC:3.6.1.1
PPAT	ENSG00000128059	HMR_4406	glutamine + H2O + PRPP -> 5-phosphoribosylamine + glutamate + PPi	EC:2.4.2.14
PPCDC	ENSG00000138621	HMR_4725|HMR_4733	(R)-4-phosphopantothenoyl-cysteine + H+ -> CO2 + phosphopantetheine	EC:4.1.1.36
PPCS	ENSG00000127125	HMR_4723|PPNCL3	ATP + cysteine + D-4-phosphopantothenate -> (R)-4-phosphopantothenoyl-cysteine + AMP + H+ + PPi|CTP + cysteine + D-4-phosphopant... <Preview truncated at 128 characters>	3.1.3.4|EC:6.3.2.5
PPIB	ENSG00000166794	HMR_9492	peptidylproline-(omega=0) <=> peptidylproline-(omega=180)	EC:5.2.1.8
PPIE	ENSG00000084072	HMR_9492	peptidylproline-(omega=0) <=> peptidylproline-(omega=180)	EC:5.2.1.8
PPIL2	ENSG00000100023	HMR_9492	peptidylproline-(omega=0) <=> peptidylproline-(omega=180)	EC:5.2.1.8
PPIP5K2	ENSG00000145725	HMR_7652|HMR_7654|HMR_7656|HMR_8835|HMR_8836	1D-myo-inositol-bisdiphosphate-tetrakisphosphate + 2 H2O -> 1D-myo-inositol-1,3,4,5,6-pentakisphosphate + H+ + Pi + PPi|5-pp-ins... <Preview truncated at 128 characters>	EC:2.7.4.21|EC:2.7.4.24
PPM1F	ENSG00000100034	HMR_9578	H2O + phosphoprotein -> [protein] + H+ + Pi	EC:3.1.3.16
PPP1CA	ENSG00000172531	HMR_0032|HMR_9578	H2O + phosphoprotein -> [protein] + H+ + Pi|lipid droplet -> 0.19 1,2-diacylglycerol-LD-TAG pool + 0.0014 1-acyl-PE pool + 0.002... <Preview truncated at 128 characters>	EC:3.1.3.16
PPP1CB	ENSG00000213639	HMR_0032|HMR_9578	H2O + phosphoprotein -> [protein] + H+ + Pi|lipid droplet -> 0.19 1,2-diacylglycerol-LD-TAG pool + 0.0014 1-acyl-PE pool + 0.002... <Preview truncated at 128 characters>	EC:3.1.3.16
PPP1CC	ENSG00000186298	HMR_0032|HMR_9578	H2O + phosphoprotein -> [protein] + H+ + Pi|lipid droplet -> 0.19 1,2-diacylglycerol-LD-TAG pool + 0.0014 1-acyl-PE pool + 0.002... <Preview truncated at 128 characters>	EC:3.1.3.16
PPP1R2	ENSG00000184203	HMR_9578	H2O + phosphoprotein -> [protein] + H+ + Pi	EC:3.1.3.16
PPP2CA	ENSG00000113575	HMR_9578	H2O + phosphoprotein -> [protein] + H+ + Pi	EC:3.1.3.16
PPP2R1A	ENSG00000105568	HMR_9578	H2O + phosphoprotein -> [protein] + H+ + Pi	EC:3.1.3.16
PPP2R2A	ENSG00000221914	HMR_9578	H2O + phosphoprotein -> [protein] + H+ + Pi	EC:3.1.3.16
PPP4C	ENSG00000149923	HMR_9578	H2O + phosphoprotein -> [protein] + H+ + Pi	EC:3.1.3.16
PPP5C	ENSG00000011485	HMR_9578	H2O + phosphoprotein -> [protein] + H+ + Pi	EC:3.1.3.16
PPP6C	ENSG00000119414	HMR_9578	H2O + phosphoprotein -> [protein] + H+ + Pi	EC:3.1.3.16
PPWD1	ENSG00000113593	HMR_9492	peptidylproline-(omega=0) <=> peptidylproline-(omega=180)	EC:5.2.1.8
PRDX2	ENSG00000167815	HMR_4116|HMR_4120|HMR_4121	2 GSH + H2O2 -> GSSG + 2 H2O	EC:1.11.1.9; EC:1.11.1.15
PRKAA1	ENSG00000132356	HMR_9577	[protein] + ATP -> ADP + phosphoprotein	EC:2.7.11.1; EC:2.7.11.8; EC:2.7.11.9; EC:2.7.11.10; EC:2.7.11.11; EC:2.7.11.12; EC:2.7.11.13; EC:2.7.11.17; EC:2.7.11.21; EC:2.7.11.22; EC:2.7.11.24; EC:2.7.11.25; EC:2.7.11.30; EC:2.7.12.1; EC:2.7.12.2
PRMT1	ENSG00000126457	HMR_6710|HMR_6737	beta-carboline + SAM -> H+ + harman + SAH|salsolinol + SAM -> (R)-1,2-dimethyl-5,6-dihydroxy-tetrahydroisoquinoline + H+ + SAH	EC:2.1.1.-
PRMT5	ENSG00000100462	HMR_6710|HMR_6737	beta-carboline + SAM -> H+ + harman + SAH|salsolinol + SAM -> (R)-1,2-dimethyl-5,6-dihydroxy-tetrahydroisoquinoline + H+ + SAH	EC:2.1.1.-
PRPF4B	ENSG00000112739	HMR_9577|HMR_9579	ATP + protamine -> ADP + O-phosphoprotamine|[protein] + ATP -> ADP + phosphoprotein	EC:2.7.11.1|EC:2.7.11.1; EC:2.7.11.8; EC:2.7.11.9; EC:2.7.11.10; EC:2.7.11.11; EC:2.7.11.12; EC:2.7.11.13; EC:2.7.11.17; EC:2.7.11.21; EC:2.7.11.22; EC:2.7.11.24; EC:2.7.11.25; EC:2.7.11.30; EC:2.7.12.1; EC:2.7.12.2
PSAP	ENSG00000197746	BGAL1l|BGAL2l|GLA2l	H2O + GA1 -> galactose + GA2|H2O + Ganglioside Gm1 -> galactose + GM2|globotriaosylceramide + H2O -> galactose + Galactosyl Gluc... <Preview truncated at 128 characters>
PTEN	ENSG00000171862	HMR_6550|HMR_6556|HMR_6558|HMR_6583|HMR_6584|HMR_6585|HMR_8807	1-phosphatidyl-1D-myo-inositol-3,4-bisphosphate + H2O -> 1-phosphatidyl-1D-myo-inositol-4-phosphate + Pi|1-phosphatidyl-1D-myo-i... <Preview truncated at 128 characters>	EC:3.1.3.67
PTPMT1	ENSG00000110536	HMR_7618|HMR_9578|PGPP_hs	H2O + PGP-CL pool -> Pi + PG-CL pool|H2O + phosphoprotein -> [protein] + H+ + Pi|[protein]-tyrosine-phosphate + H2O -> [protein]... <Preview truncated at 128 characters>	3.1.3.27|EC:3.1.3.16|EC:3.1.3.48
PTPN1	ENSG00000196396	HMR_7618	[protein]-tyrosine-phosphate + H2O -> [protein]-L-tyrosine + Pi	EC:3.1.3.48
PTPN11	ENSG00000179295	HMR_7618	[protein]-tyrosine-phosphate + H2O -> [protein]-L-tyrosine + Pi	EC:3.1.3.48
PTPN23	ENSG00000076201	HMR_7618	[protein]-tyrosine-phosphate + H2O -> [protein]-L-tyrosine + Pi	EC:3.1.3.48
PTPRH	ENSG00000080031	HMR_7618	[protein]-tyrosine-phosphate + H2O -> [protein]-L-tyrosine + Pi	EC:3.1.3.48
PYGM	ENSG00000068976	GLPASE2|HMR_5398|HMR_5401	glycogenin G4G7 + 3 Pi -> 3 glucose-1-phosphate + glycogenin G4G4|glycogenin G7 + 7 H2O -> 7 glucose + Tyr-194 Of Apo-Glycogenin... <Preview truncated at 128 characters>	2.4.1.1|EC:2.4.1.1
QARS	ENSG00000172053	HMR_5136	ATP + glutamine + tRNA(gln) -> AMP + L-glutaminyl-tRNA(gln) + PPi	EC:6.1.1.18
RAD1	ENSG00000113456	HMR_7163|HMR_7164	DNA + H2O -> 0.3 dAMP + 0.2 dCMP + 0.2 dGMP + 0.3 dTMP + H+|H2O + RNA -> 0.18 AMP + 0.3 CMP + 0.34 GMP + H+ + 0.18 UMP	EC:3.1.11.2
RAD9A	ENSG00000172613	HMR_7163|HMR_7164	DNA + H2O -> 0.3 dAMP + 0.2 dCMP + 0.2 dGMP + 0.3 dTMP + H+|H2O + RNA -> 0.18 AMP + 0.3 CMP + 0.34 GMP + H+ + 0.18 UMP	EC:3.1.11.2
RAE1	ENSG00000101146	HMR_8639	DNA <=> DNA
RAF1	ENSG00000132155	HMR_9577|HMR_9579	ATP + protamine -> ADP + O-phosphoprotamine|[protein] + ATP -> ADP + phosphoprotein	EC:2.7.11.1|EC:2.7.11.1; EC:2.7.11.8; EC:2.7.11.9; EC:2.7.11.10; EC:2.7.11.11; EC:2.7.11.12; EC:2.7.11.13; EC:2.7.11.17; EC:2.7.11.21; EC:2.7.11.22; EC:2.7.11.24; EC:2.7.11.25; EC:2.7.11.30; EC:2.7.12.1; EC:2.7.12.2
RARS	ENSG00000113643	HMR_5132	arginine + ATP + tRNA(arg) -> AMP + L-arginyl-tRNA(arg) + PPi	EC:6.1.1.19
RBBP6	ENSG00000122257	HMR_9491	[protein]-L-lysine + ATP + ubiquitin -> [protein]-N-ubiquityllysine + AMP + PPi	EC:6.3.2.19
RCL1	ENSG00000120158	HMR_9546	AMP + PPi + RNA-terminal-2,3-cyclic-phosphate <=> ATP + RNA-3-terminal-phosphate	EC:6.5.1.4
RDH5	ENSG00000135437	HMR_6631|HMR_6633|HMR_6638|HMR_6644|HMR_8709|HMR_8710	11-cis-retinal + H+ + NADH <=> 11-cis-retinol + NAD+|11-cis-retinal + H+ + NADPH <=> 11-cis-retinol + NADP+|13-cis-retinal + H+ ... <Preview truncated at 128 characters>	EC:1.1.1.105|EC:1.1.1.1; EC:1.1.1.105|EC:1.1.1.315
RDH8	ENSG00000080511	HMR_6630|HMR_6632|RDH2a	9-cis-retinol + NADP+ -> 9-cis-retinal + H+ + NADPH|NADP+ + retinol -> H+ + NADPH + retinal	1.1.1.105|EC:1.1.1.300
REV3L	ENSG00000009413	HMR_7160	0.3 dATP + 0.2 dCTP + 0.2 dGTP + 0.3 dTTP -> DNA + PPi	EC:2.7.7.7
RFC5	ENSG00000111445	HMR_7160	0.3 dATP + 0.2 dCTP + 0.2 dGTP + 0.3 dTTP -> DNA + PPi	EC:2.7.7.7
RFK	ENSG00000135002	HMR_6506	ATP + riboflavin -> ADP + FMN + H+	EC:2.7.1.26
RFWD3	ENSG00000168411	HMR_9491	[protein]-L-lysine + ATP + ubiquitin -> [protein]-N-ubiquityllysine + AMP + PPi	EC:6.3.2.19
RING1	ENSG00000204227	HMR_9491	[protein]-L-lysine + ATP + ubiquitin -> [protein]-N-ubiquityllysine + AMP + PPi	EC:6.3.2.19
RIOK1	ENSG00000124784	HMR_9577|HMR_9579	ATP + protamine -> ADP + O-phosphoprotamine|[protein] + ATP -> ADP + phosphoprotein	EC:2.7.11.1|EC:2.7.11.1; EC:2.7.11.8; EC:2.7.11.9; EC:2.7.11.10; EC:2.7.11.11; EC:2.7.11.12; EC:2.7.11.13; EC:2.7.11.17; EC:2.7.11.21; EC:2.7.11.22; EC:2.7.11.24; EC:2.7.11.25; EC:2.7.11.30; EC:2.7.12.1; EC:2.7.12.2
RIOK2	ENSG00000058729	HMR_9577|HMR_9579	ATP + protamine -> ADP + O-phosphoprotamine|[protein] + ATP -> ADP + phosphoprotein	EC:2.7.11.1|EC:2.7.11.1; EC:2.7.11.8; EC:2.7.11.9; EC:2.7.11.10; EC:2.7.11.11; EC:2.7.11.12; EC:2.7.11.13; EC:2.7.11.17; EC:2.7.11.21; EC:2.7.11.22; EC:2.7.11.24; EC:2.7.11.25; EC:2.7.11.30; EC:2.7.12.1; EC:2.7.12.2
RNF20	ENSG00000155827	HMR_9491	[protein]-L-lysine + ATP + ubiquitin -> [protein]-N-ubiquityllysine + AMP + PPi	EC:6.3.2.19
RNF31	ENSG00000092098	HMR_9491	[protein]-L-lysine + ATP + ubiquitin -> [protein]-N-ubiquityllysine + AMP + PPi	EC:6.3.2.19
RNF40	ENSG00000103549	HMR_9491	[protein]-L-lysine + ATP + ubiquitin -> [protein]-N-ubiquityllysine + AMP + PPi	EC:6.3.2.19
RNF8	ENSG00000112130	HMR_9491	[protein]-L-lysine + ATP + ubiquitin -> [protein]-N-ubiquityllysine + AMP + PPi	EC:6.3.2.19
RNGTT	ENSG00000111880	HMR_9507|HMR_9508	(5)ppPur-mRNA + GTP <=> G(5)pppR-RNA + PPi|5-phosphopolynucleotide + H2O -> Pi + polynucleotide	EC:2.7.7.50|EC:3.1.3.33
RNMT	ENSG00000101654	HMR_9509	G(5)pppR-RNA + SAM <=> m7G(5)pppR-RNA + SAH	EC:2.1.1.56
RPAP2	ENSG00000122484	HMR_9578	H2O + phosphoprotein -> [protein] + H+ + Pi	EC:3.1.3.16
RPE	ENSG00000197713	HMR_4477|RPEc	2 ribulose-5-phosphate <=> 2 D-xylulose-5-phosphate|D-xylulose-5-phosphate <=> ribulose-5-phosphate	5.1.3.1|EC:5.1.3.1
RPN1	ENSG00000163902	HMR_7285	(Glc)3 (GlcNAc)2 (Man)9 (PP-Dol)1 + [protein]-L-asparagine -> (alpha-D-Glucosyl)3-(alpha-D-mannosyl)8-beta-D-mannosyl-diacetylch... <Preview truncated at 128 characters>	EC:2.4.99.18
RPN2	ENSG00000118705	HMR_7285	(Glc)3 (GlcNAc)2 (Man)9 (PP-Dol)1 + [protein]-L-asparagine -> (alpha-D-Glucosyl)3-(alpha-D-mannosyl)8-beta-D-mannosyl-diacetylch... <Preview truncated at 128 characters>	EC:2.4.99.18
RPP14	ENSG00000163684	HMR_1321|HMR_1395|HMR_6640	H2O + prostaglandin A1 <=> prostaglandin E1|H2O + prostaglandin A2 <=> prostaglandin E2|retinol -> anhydroretinol + H2O	EC:4.2.1.-
RPS6KA4	ENSG00000162302	HMR_9577|HMR_9579	ATP + protamine -> ADP + O-phosphoprotamine|[protein] + ATP -> ADP + phosphoprotein	EC:2.7.11.1|EC:2.7.11.1; EC:2.7.11.8; EC:2.7.11.9; EC:2.7.11.10; EC:2.7.11.11; EC:2.7.11.12; EC:2.7.11.13; EC:2.7.11.17; EC:2.7.11.21; EC:2.7.11.22; EC:2.7.11.24; EC:2.7.11.25; EC:2.7.11.30; EC:2.7.12.1; EC:2.7.12.2
RPUSD4	ENSG00000165526	HMR_7744	H2O + pseudouridine-5-phosphate <=> ribose-5-phosphate + uracil	EC:4.2.1.70
RRM1	ENSG00000167325	HMR_4611|HMR_4612|HMR_4614|HMR_4615|HMR_4617|HMR_4618|HMR_4619|HMR_4621|HMR_5415|HMR_5416|HMR_6621|HMR_6622|r1431|r1432	ADP + thioredoxin -> dADP + H2O + oxidized thioredoxin|ATP + thioredoxin -> dATP + H2O + oxidized thioredoxin|CDP + thioredoxin ... <Preview truncated at 128 characters>	1.17.4.1|EC:1.17.4.1
RRM2	ENSG00000171848	HMR_4611|HMR_4612|HMR_4614|HMR_4615|HMR_4617|HMR_4618|HMR_4619|HMR_4621|HMR_5415|HMR_5416|HMR_6621|HMR_6622|r1431|r1432	ADP + thioredoxin -> dADP + H2O + oxidized thioredoxin|ATP + thioredoxin -> dATP + H2O + oxidized thioredoxin|CDP + thioredoxin ... <Preview truncated at 128 characters>	1.17.4.1|EC:1.17.4.1
SACM1L	ENSG00000211456	HMR_6545|HMR_6547|HMR_6557|HMR_6591	1-phosphatidyl-1D-myo-inositol-4-phosphate + H2O -> PI pool + Pi|1-phosphatidyl-myo-inositol-3,5-bisphosphate + H2O -> 1-phospha... <Preview truncated at 128 characters>	EC:3.1.3.-
SAE1	ENSG00000142230	HMR_9491	[protein]-L-lysine + ATP + ubiquitin -> [protein]-N-ubiquityllysine + AMP + PPi	EC:6.3.2.19
SAP130	ENSG00000136715	HMR_9464	dextrin + H2O -> dextrin(n-1) + glucose	EC:3.2.1.3; EC:3.2.1.10
SARS	ENSG00000031698	HMR_5147	ATP + serine + tRNA(ser) -> AMP + L-seryl-tRNA(ser) + PPi	EC:6.1.1.11
SCARF2	ENSG00000244486	HMR_1321|HMR_1395|HMR_6640	H2O + prostaglandin A1 <=> prostaglandin E1|H2O + prostaglandin A2 <=> prostaglandin E2|retinol -> anhydroretinol + H2O	EC:4.2.1.-
SCD	ENSG00000099194	DESAT16_2|DESAT18_3|DESAT18_4|DESAT18_5|HMR_0030|HMR_2281|HMR_2282|HMR_2284|HMR_2286|HMR_2287|HMR_2288|HMR_2289|HMR_2292|HMR_229... <Preview truncated at 128 characters>	2 ferrocytochrome B5 + 2 H+ + O2 + palmitoyl-CoA -> 2 ferricytochrome B5 + 2 H2O + palmitoleoyl-CoA|2 ferrocytochrome B5 + 2 H+ ... <Preview truncated at 128 characters>	EC:1.14.19.1
SDHA	ENSG00000073578	HMR_4652|HMR_8743	FADH2 + fumarate <=> FAD + succinate|fumarate + ubiquinol <=> succinate + ubiquinone	EC:1.3.5.1
SDHB	ENSG00000117118	HMR_4652|HMR_8743	FADH2 + fumarate <=> FAD + succinate|fumarate + ubiquinol <=> succinate + ubiquinone	EC:1.3.5.1
SDHC	ENSG00000143252	HMR_4652|HMR_6911|HMR_8743	FADH2 + fumarate <=> FAD + succinate|FADH2 + ubiquinone <=> FAD + ubiquinol|fumarate + ubiquinol <=> succinate + ubiquinone	EC:1.3.5.1|EC:1.5.5.1
SDHD	ENSG00000204370	HMR_4652|HMR_8743	FADH2 + fumarate <=> FAD + succinate|fumarate + ubiquinol <=> succinate + ubiquinone	EC:1.3.5.1
SEC13	ENSG00000157020	HMR_8639	DNA <=> DNA
SEH1L	ENSG00000085415	HMR_8639	DNA <=> DNA
SEPHS1	ENSG00000086475	HMR_7132	ATP + H2O + selenide -> AMP + Pi + selenophosphate	EC:2.7.9.3
SEPHS2	ENSG00000179918	HMR_7132	ATP + H2O + selenide -> AMP + Pi + selenophosphate	EC:2.7.9.3
SETD1A	ENSG00000099381	HMR_4241|HMR_6975|HMR_6976|HMR_6977|HMR_8025|HMR_8026|HMR_8027	H+ + histone-N6-methyl-L-lysine + SAH <=> histone-L-lysine + SAM|[protein]-L-lysine + SAM -> H+ + histone-N6-methyl-L-lysine + S... <Preview truncated at 128 characters>	EC:2.1.1.43
SETD1B	ENSG00000139718	HMR_4241|HMR_6975|HMR_6976|HMR_6977|HMR_8025|HMR_8026|HMR_8027	H+ + histone-N6-methyl-L-lysine + SAH <=> histone-L-lysine + SAM|[protein]-L-lysine + SAM -> H+ + histone-N6-methyl-L-lysine + S... <Preview truncated at 128 characters>	EC:2.1.1.43
SETD2	ENSG00000181555	HMR_4241|HMR_6975|HMR_6976|HMR_6977|HMR_8025|HMR_8026|HMR_8027	H+ + histone-N6-methyl-L-lysine + SAH <=> histone-L-lysine + SAM|[protein]-L-lysine + SAM -> H+ + histone-N6-methyl-L-lysine + S... <Preview truncated at 128 characters>	EC:2.1.1.43
SGMS1	ENSG00000198964	HMR_0735|HMR_0736|SMS1|SMS10|SMS11|SMS12|SMS13|SMS14|SMS15|SMS16|SMS2|SMS3|SMS4|SMS5|SMS6|SMS7|SMS8|SMS9	ceramide pool + PC-LD pool -> 1,2-diacylglycerol-LD-PC pool + SM pool|ceramide pool + PC-LD pool -> 1,2-diacylglycerol-LD-TAG po... <Preview truncated at 128 characters>	2.7.8.27|EC:2.7.8.27
SHMT2	ENSG00000182199	GHMT3m|HMR_4792|HMR_6980	3-hydroxy-N6,N6,N6-trimethyl-L-lysine + H+ -> 4-trimethylammoniobutanal + glycine|5,10-methylene-THF + glycine + H2O <=> serine ... <Preview truncated at 128 characters>	2.1.2.1|EC:2.1.2.1
SIAH1	ENSG00000196470	HMR_9491	[protein]-L-lysine + ATP + ubiquitin -> [protein]-N-ubiquityllysine + AMP + PPi	EC:6.3.2.19
SIK2	ENSG00000170145	HMR_9577|HMR_9579	ATP + protamine -> ADP + O-phosphoprotamine|[protein] + ATP -> ADP + phosphoprotein	EC:2.7.11.1|EC:2.7.11.1; EC:2.7.11.8; EC:2.7.11.9; EC:2.7.11.10; EC:2.7.11.11; EC:2.7.11.12; EC:2.7.11.13; EC:2.7.11.17; EC:2.7.11.21; EC:2.7.11.22; EC:2.7.11.24; EC:2.7.11.25; EC:2.7.11.30; EC:2.7.12.1; EC:2.7.12.2
SIN3A	ENSG00000169375	HMR_0024	fatty acid-ligands + PPARA -> activation-ppara
SLC16A1	ENSG00000155380	2HYOXPLCte|ATVACIDMCTtu|BTNt2m|BUTt2m|BUTt2r|HMR_1443|HMR_3007|HMR_3858|HMR_4928|HMR_4930|HMR_4935|HMR_4976|HMR_4977|HMR_5016|HM... <Preview truncated at 128 characters>	(R)-3-hydroxybutanoate + 2-hydroxybutyrate <=> (R)-3-hydroxybutanoate + 2-hydroxybutyrate|(R)-3-hydroxybutanoate + AKG <=> (R)-3... <Preview truncated at 128 characters>	TCDB:1.D.6.1.1|TCDB:2.A.1.13.1|TCDB:2.A.1.13.1; TCDB:2.A.1.13.5
SLC1A5	ENSG00000105281	HDD2CRNte2|HMR_5305|HMR_5308|HMR_5603|HMR_5604|HMR_5609|HMR_5612|HMR_5614|HMR_5618|HMR_5619|HMR_5624|HMR_5627|HMR_5629|HMR_5633|... <Preview truncated at 128 characters>	Na+ + hexadecenoylcarnitine(9) -> hexadecenoylcarnitine(9) + Na+|Na+ + serine + threonine -> Na+ + serine + threonine|alanine + ... <Preview truncated at 128 characters>	TCDB:2.A.18.6.5|TCDB:2.A.18.6.7
SLC20A1	ENSG00000144136	HMR_4911|HMR_4912|HMR_5413|PIt8	1.5 Na+ + Pi <=> 1.5 Na+ + Pi|2 Na+ + Pi -> 2 Na+ + Pi|3 Na+ + 2 Pi -> 3 Na+ + 2 Pi|H+ + Pi -> H+ + Pi
SLC25A1	ENSG00000100075	CITtam|HMR_4964|HMR_4971|HMR_4972|HMR_6276|HMR_6277|HMR_6286|HMR_6287|HMR_6288|HMR_6289|HMR_6290|HMR_6291|HMR_6292|HMR_6293|HMR_... <Preview truncated at 128 characters>	AKG + H+ + isocitrate -> AKG + H+ + isocitrate|AKG + cis-aconitate + H+ -> AKG + cis-aconitate + H+|AKG + cis-aconitate <=> AKG ... <Preview truncated at 128 characters>	4.2.1.56|TCDB:2.A.29.7.2
SLC25A26	ENSG00000144741	HMR_7769	SAH + SAM <=> SAH + SAM
SLC25A3	ENSG00000075415	HMR_5043|PIt2mi	H+ + Pi -> H+ + Pi|Pi + H+ -> H+ + Pi	TCDB:2.A.29.4.1
SLC28A1	ENSG00000156222	ALLOP1tu|HMR_4845|HMR_4983|HMR_5038|HMR_5039|HMR_5040|HMR_6351|HMR_6352	Na+ + allopurinol -> Na+ + allopurinol|Na+ + thymidine -> Na+ + thymidine|Na+ + uridine -> Na+ + uridine|adenosine + Na+ -> aden... <Preview truncated at 128 characters>	TCDB:2.A.41.2.3|TCDB:2.A.57; TCDB:2.A.41.2.3; TCDB:2.A.41.2.4
SLC2A1	ENSG00000117394	HMR_4858|HMR_4973|HMR_4996|HMR_5027|HMR_5029|HMR_7675|HMR_8846	dehydroascorbic acid <=> dehydroascorbic acid|galactose <=> galactose|glucosamine -> glucosamine|glucose <=> glucose|mannose <=>... <Preview truncated at 128 characters>
SLC31A1	ENSG00000136868	HMR_9587	Cu2+ -> Cu2+
SLC33A1	ENSG00000169359	ACCOAtr|HMR_0158|HMR_8224|HMR_8225|HMR_8226|HMR_8227|HMR_8228	acetyl-CoA + GD3 -> 9-O-acetylated-GD3 + CoA|acetyl-CoA + GT3 -> 9-O-acetylated-GT3 + CoA|acetyl-CoA <=> acetyl-CoA|butyryl-CoA ... <Preview truncated at 128 characters>
SLC38A5	ENSG00000017483	CYSSNAT5tc|HMR_5307|HMR_5310|HMR_5313|HMR_6380|HMR_6381|HMR_6382|HMR_6384|HMR_8735|HMR_9605|HMR_9606	H+ + 2 Na+ + serine -> H+ + 2 Na+ + serine|H+ + Na+ + serine -> H+ + Na+ + serine|H+ + histidine + Na+ -> H+ + histidine + Na+|a... <Preview truncated at 128 characters>
SLC3A2	ENSG00000168003	34DHPHELAT1tc|ALAyLATthc|AMY2e|ARGN1ASPMDte|GLNyLATthc|HISyLATtc|HISyLATthc|HMR_4931|HMR_5070|HMR_5073|HMR_5074|HMR_5076|HMR_507... <Preview truncated at 128 characters>	8 H2O + glycogenin G4G7 -> 8 glucose + Glycogen, Structure 4 (Glycogenin-1,6-{2[1,4-Glc], [1,4-Glc]})|D-alanine + glutamine <=> ... <Preview truncated at 128 characters>	TCDB:2.A.1.19; TCDB:2.A.3.3; TCDB:2.A.3.8; TCDB:2.A.1.44|TCDB:2.A.3.3; TCDB:2.A.3.8; TCDB:2.A.1.44|TCDB:2.A.3.8.5
SLC4A7	ENSG00000033867	HMR_5432|HMR_8076|HMR_8077	2 HCO3- + Na+ -> 2 HCO3- + Na+|3 HCO3- + Na+ -> 3 HCO3- + Na+|HCO3- + Na+ -> HCO3- + Na+	TCDB:2.A.31.2.1
SLC5A3	ENSG00000198743	HMR_8911|HMR_8912|NAt	Na+ <=> Na+|inositol + 2 Na+ -> inositol + 2 Na+|inositol + Na+ -> inositol + Na+
SLC7A11	ENSG00000151012	HMR_4931|HMR_5719	cysteine + Na+ + threonine -> cysteine + Na+ + threonine|cystine + glutamate -> cystine + glutamate	TCDB:2.A.3.8.5
SLC7A5	ENSG00000103257	34DHPHELAT1tc|HKYNRtr|HMR_5070|HMR_5073|HMR_5074|HMR_5076|HMR_5077|HMR_5078|HMR_5079|HMR_5080|HMR_5082|HMR_5084|HMR_5085|HMR_508... <Preview truncated at 128 characters>	L-dopa + leucine -> L-dopa + leucine|Na+ + phenylalanine + serine -> Na+ + phenylalanine + serine|Na+ + phenylalanine + tryptoph... <Preview truncated at 128 characters>	TCDB:2.A.1.19; TCDB:2.A.3.3; TCDB:2.A.3.8; TCDB:2.A.1.44|TCDB:2.A.3.3; TCDB:2.A.3.8; TCDB:2.A.1.44|TCDB:2.A.3.8.1
SMG1	ENSG00000157106	HMR_9577|HMR_9579	ATP + protamine -> ADP + O-phosphoprotamine|[protein] + ATP -> ADP + phosphoprotein	EC:2.7.11.1|EC:2.7.11.1; EC:2.7.11.8; EC:2.7.11.9; EC:2.7.11.10; EC:2.7.11.11; EC:2.7.11.12; EC:2.7.11.13; EC:2.7.11.17; EC:2.7.11.21; EC:2.7.11.22; EC:2.7.11.24; EC:2.7.11.25; EC:2.7.11.30; EC:2.7.12.1; EC:2.7.12.2
SOD1	ENSG00000142168	HMR_3960|HMR_8413|HMR_8415	2 H+ + 2 O2- -> H2O2 + O2	EC:1.15.1.1
SOD2	ENSG00000112096	HMR_3960|HMR_8410	2 H+ + 2 O2- -> H2O2 + O2	EC:1.15.1.1
SPCS2	ENSG00000118363	HMR_6978|HMR_8029	[protein]-N6,N6,N6-trimethyl-L-lysine + H2O -> H+ + N6,N6,N6-trimethyl-L-lysine + [protein]|[protein]-N6,N6,N6-trimethyl-L-lysin... <Preview truncated at 128 characters>	EC:3.4.21.89; EC:3.4.-.-
SPCS3	ENSG00000129128	HMR_6978|HMR_8029	[protein]-N6,N6,N6-trimethyl-L-lysine + H2O -> H+ + N6,N6,N6-trimethyl-L-lysine + [protein]|[protein]-N6,N6,N6-trimethyl-L-lysin... <Preview truncated at 128 characters>	EC:3.4.21.89; EC:3.4.-.-
SPTLC1	ENSG00000090054	HMR_0738	H+ + palmitoyl-CoA + serine -> 3-dehydrosphinganine + CO2 + CoA	EC:2.3.1.50
SPTLC2	ENSG00000100596	HMR_0738	H+ + palmitoyl-CoA + serine -> 3-dehydrosphinganine + CO2 + CoA	EC:2.3.1.50
SRD5A3	ENSG00000128039	HMR_1976|HMR_1977|HMR_2002|HMR_2015	4-androstene-3,17-dione + H+ + NADPH <=> 5alpha-androstane-3,17-dione + NADP+|5alpha-pregnane-3,20-dione + NADP+ <=> H+ + NADPH ... <Preview truncated at 128 characters>	EC:1.3.1.22|EC:1.3.1.30
SREBF1	ENSG00000072310	HMR_0030	activation-ppara -> activation-ppara
SRM	ENSG00000116649	HMR_4075|HMR_4077	S-adenosylmethioninamine + spermidine -> 5-methylthioadenosine + H+ + spermine|putrescine + S-adenosylmethioninamine -> 5-methyl... <Preview truncated at 128 characters>	EC:2.5.1.16|EC:2.5.1.16; EC:2.5.1.22
SSU72	ENSG00000160075	HMR_9578	H2O + phosphoprotein -> [protein] + H+ + Pi	EC:3.1.3.16
STARD7	ENSG00000084090	HMR_1924	cholesterol + STAR -> cholesterol-STAR
STK11	ENSG00000118046	HMR_9577	[protein] + ATP -> ADP + phosphoprotein	EC:2.7.11.1; EC:2.7.11.8; EC:2.7.11.9; EC:2.7.11.10; EC:2.7.11.11; EC:2.7.11.12; EC:2.7.11.13; EC:2.7.11.17; EC:2.7.11.21; EC:2.7.11.22; EC:2.7.11.24; EC:2.7.11.25; EC:2.7.11.30; EC:2.7.12.1; EC:2.7.12.2
SUCLG1	ENSG00000163541	HMR_4147|HMR_4152|HMR_8662|HMR_8663|HMR_8667|HMR_8668	ADP + Pi + succinyl-CoA <=> ATP + CoA + succinate|ADP + itaconyl-CoA + Pi <=> ATP + CoA + itaconate|ADP + mesaconyl-CoA + Pi <=>... <Preview truncated at 128 characters>	EC:6.2.1.4|EC:6.2.1.5
SULT1A3	ENSG00000261052	DOPASULT4|HMR_1919|HMR_2037|HMR_4549|HMR_5381|HMR_7688|HMR_7689|HMR_8062|HMR_8094|HMR_8534|HMR_8535	6-hydroxymelatonin-sulfate + H+ <=> 6-hydroxymelatonin + sulfite|PAPS + PNP -> 4-nitrophenyl-sulfate + H+ + PAP|PAPS + thioredox... <Preview truncated at 128 characters>	EC:2.8.2.1
SULT1A4	ENSG00000213648	HMR_7688|HMR_7689|HMR_8534|HMR_8535	PAPS + PNP -> 4-nitrophenyl-sulfate + H+ + PAP|PAPS + triiodothyronine -> 3,5,3-triiodothyronine-4-sulfate + H+ + PAP|PAPS + tyr... <Preview truncated at 128 characters>	EC:2.8.2.1
SUV39H1	ENSG00000101945	HMR_4241|HMR_6975|HMR_6976|HMR_6977|HMR_8025|HMR_8026|HMR_8027	H+ + histone-N6-methyl-L-lysine + SAH <=> histone-L-lysine + SAM|[protein]-L-lysine + SAM -> H+ + histone-N6-methyl-L-lysine + S... <Preview truncated at 128 characters>	EC:2.1.1.43
SYVN1	ENSG00000162298	HMR_9491	[protein]-L-lysine + ATP + ubiquitin -> [protein]-N-ubiquityllysine + AMP + PPi	EC:6.3.2.19
TAF1	ENSG00000147133	HMR_9577|HMR_9579	ATP + protamine -> ADP + O-phosphoprotamine|[protein] + ATP -> ADP + phosphoprotein	EC:2.7.11.1|EC:2.7.11.1; EC:2.7.11.8; EC:2.7.11.9; EC:2.7.11.10; EC:2.7.11.11; EC:2.7.11.12; EC:2.7.11.13; EC:2.7.11.17; EC:2.7.11.21; EC:2.7.11.22; EC:2.7.11.24; EC:2.7.11.25; EC:2.7.11.30; EC:2.7.12.1; EC:2.7.12.2
TARS	ENSG00000113407	HMR_5148	ATP + threonine + tRNA(thr) -> AMP + L-threonyl-tRNA(thr) + PPi	EC:6.1.1.3
TAZ	ENSG00000102125	HMR_0158	butyryl-CoA + L-carnitine <=> butyryl-CoA + L-carnitine
TBCB	ENSG00000105254	HMR_2581|HMR_2582	EPA + H+ + NADPH + 2 O2 -> H2O + NADP+ + PGH3	EC:1.14.99.1
TFB2M	ENSG00000162851	HMR_6710|HMR_6737	beta-carboline + SAM -> H+ + harman + SAH|salsolinol + SAM -> (R)-1,2-dimethyl-5,6-dihydroxy-tetrahydroisoquinoline + H+ + SAH	EC:2.1.1.-
TFRC	ENSG00000072274	HMR_5164	2094 ATP + 52 glycyl-tRNA(gly) + 2095 H2O + 61 L-alanyl-tRNA(ala) + 27 L-arginyl-tRNA(arg) + 34 L-asparaginyl-tRNA(asn) + 45 L-a... <Preview truncated at 128 characters>
TGS1	ENSG00000137574	HMR_0024|HMR_6710|HMR_6737	beta-carboline + SAM -> H+ + harman + SAH|fatty acid-ligands + PPARA -> activation-ppara|salsolinol + SAM -> (R)-1,2-dimethyl-5,... <Preview truncated at 128 characters>	EC:2.1.1.-
TICRR	ENSG00000140534	HMR_0834	H2O + GM4 -> D-galactosyl-N-acylsphingosine + H+ + N-acetylneuraminate	EC:3.2.1.18
TKT	ENSG00000163931	HMR_4404|HMR_4501	D-xylulose-5-phosphate + erythrose-4-phosphate <=> fructose-6-phosphate + GAP|D-xylulose-5-phosphate + ribose-5-phosphate <=> GA... <Preview truncated at 128 characters>	EC:2.2.1.1
TP53RK	ENSG00000172315	HMR_9577|HMR_9579	ATP + protamine -> ADP + O-phosphoprotamine|[protein] + ATP -> ADP + phosphoprotein	EC:2.7.11.1|EC:2.7.11.1; EC:2.7.11.8; EC:2.7.11.9; EC:2.7.11.10; EC:2.7.11.11; EC:2.7.11.12; EC:2.7.11.13; EC:2.7.11.17; EC:2.7.11.21; EC:2.7.11.22; EC:2.7.11.24; EC:2.7.11.25; EC:2.7.11.30; EC:2.7.12.1; EC:2.7.12.2
TPI1	ENSG00000111669	HMR_4391	DHAP <=> GAP	EC:5.3.1.1
TPR	ENSG00000047410	HMR_8639	DNA <=> DNA
TRMT1	ENSG00000104907	HMR_9519	H+ + SAH + tRNA containing N2-methylguanine <=> SAM + tRNA-guanine	EC:2.1.1.214; EC:2.1.1.215; EC:2.1.1.216
TRMT10C	ENSG00000174173	HMR_6710|HMR_6737	beta-carboline + SAM -> H+ + harman + SAH|salsolinol + SAM -> (R)-1,2-dimethyl-5,6-dihydroxy-tetrahydroisoquinoline + H+ + SAH	EC:2.1.1.-
TRPM7	ENSG00000092439	HMR_9577|HMR_9579	ATP + protamine -> ADP + O-phosphoprotamine|[protein] + ATP -> ADP + phosphoprotein	EC:2.7.11.1|EC:2.7.11.1; EC:2.7.11.8; EC:2.7.11.9; EC:2.7.11.10; EC:2.7.11.11; EC:2.7.11.12; EC:2.7.11.13; EC:2.7.11.17; EC:2.7.11.21; EC:2.7.11.22; EC:2.7.11.24; EC:2.7.11.25; EC:2.7.11.30; EC:2.7.12.1; EC:2.7.12.2
TSSK2	ENSG00000206203	HMR_9577|HMR_9579	ATP + protamine -> ADP + O-phosphoprotamine|[protein] + ATP -> ADP + phosphoprotein	EC:2.7.11.1|EC:2.7.11.1; EC:2.7.11.8; EC:2.7.11.9; EC:2.7.11.10; EC:2.7.11.11; EC:2.7.11.12; EC:2.7.11.13; EC:2.7.11.17; EC:2.7.11.21; EC:2.7.11.22; EC:2.7.11.24; EC:2.7.11.25; EC:2.7.11.30; EC:2.7.12.1; EC:2.7.12.2
TTK	ENSG00000112742	HMR_7617|HMR_9577	[protein] + ATP -> ADP + phosphoprotein|[protein]-L-tyrosine + ATP -> [protein]-tyrosine-phosphate + ADP + H+	EC:2.7.10.1; EC:2.7.10.2; EC:2.7.12.1; EC:2.7.12.2|EC:2.7.11.1; EC:2.7.11.8; EC:2.7.11.9; EC:2.7.11.10; EC:2.7.11.11; EC:2.7.11.12; EC:2.7.11.13; EC:2.7.11.17; EC:2.7.11.21; EC:2.7.11.22; EC:2.7.11.24; EC:2.7.11.25; EC:2.7.11.30; EC:2.7.12.1; EC:2.7.12.2
TUFM	ENSG00000178952	HMR_4136	GTP + H2O -> GDP + H+ + Pi	EC:3.6.5.1; EC:3.6.5.2; EC:3.6.5.3; EC:3.6.5.4; EC:3.6.5.5; EC:3.6.5.6
TUT1	ENSG00000149016	HMR_7161|HMR_7162	0.18 ADP + 0.3 CDP + 0.34 GDP + 0.18 UDP -> Pi + RNA|0.18 ATP + 0.3 CTP + 0.34 GTP + 0.18 UTP -> PPi + RNA	EC:2.7.7.6; EC:2.7.7.19; EC:2.7.7.52|EC:2.7.7.8
TXN	ENSG00000136810	HMR_4611|HMR_4612|HMR_4614|HMR_4615|HMR_4617|HMR_4618|HMR_4619|HMR_4621|HMR_5415|HMR_5416|HMR_6621|HMR_6622|r1431|r1432	ADP + thioredoxin -> dADP + H2O + oxidized thioredoxin|ATP + thioredoxin -> dATP + H2O + oxidized thioredoxin|CDP + thioredoxin ... <Preview truncated at 128 characters>	1.17.4.1|EC:1.17.4.1
TXN2	ENSG00000100348	HMR_4611|HMR_4612|HMR_4614|HMR_4615|HMR_4617|HMR_4618|HMR_4619|HMR_4621|HMR_5415|HMR_5416|HMR_6621|HMR_6622|r1431|r1432	ADP + thioredoxin -> dADP + H2O + oxidized thioredoxin|ATP + thioredoxin -> dATP + H2O + oxidized thioredoxin|CDP + thioredoxin ... <Preview truncated at 128 characters>	1.17.4.1|EC:1.17.4.1
TXNRD1	ENSG00000198431	HMR_0025|HMR_3931|HMR_3995|HMR_5417|HMR_7131|HMR_8482|TRDR2|TRDR3|r1433	4 H+ + 3 NADPH + selenite <=> 3 H2O + 3 NADP+ + selenide|H+ + NADH + ubiquinone -> NAD+ + ubiquinol|H+ + NADPH + oxidized thiore... <Preview truncated at 128 characters>	EC:1.8.1.9
TXNRD2	ENSG00000184470	HMR_3931|HMR_3995|HMR_5417|HMR_7131|HMR_8482|r1433	4 H+ + 3 NADPH + selenite <=> 3 H2O + 3 NADP+ + selenide|H+ + NADPH + oxidized thioredoxin -> NADP+ + thioredoxin|H+ + mitooxidi... <Preview truncated at 128 characters>	1.8.1.9|EC:1.8.1.9
TYMS	ENSG00000176890	HMR_4644	5,10-methylene-THF + dUMP <=> dihydrofolate + dTMP	EC:2.1.1.45
TYRO3	ENSG00000092445	HMR_7617	[protein]-L-tyrosine + ATP -> [protein]-tyrosine-phosphate + ADP + H+	EC:2.7.10.1; EC:2.7.10.2; EC:2.7.12.1; EC:2.7.12.2
UBA1	ENSG00000130985	HMR_9491	[protein]-L-lysine + ATP + ubiquitin -> [protein]-N-ubiquityllysine + AMP + PPi	EC:6.3.2.19
UBA2	ENSG00000126261	HMR_9491	[protein]-L-lysine + ATP + ubiquitin -> [protein]-N-ubiquityllysine + AMP + PPi	EC:6.3.2.19
UBA3	ENSG00000144744	HMR_9491	[protein]-L-lysine + ATP + ubiquitin -> [protein]-N-ubiquityllysine + AMP + PPi	EC:6.3.2.19
UBE2A	ENSG00000077721	HMR_9491	[protein]-L-lysine + ATP + ubiquitin -> [protein]-N-ubiquityllysine + AMP + PPi	EC:6.3.2.19
UBE2G2	ENSG00000184787	HMR_9491	[protein]-L-lysine + ATP + ubiquitin -> [protein]-N-ubiquityllysine + AMP + PPi	EC:6.3.2.19
UBE2I	ENSG00000103275	HMR_9491	[protein]-L-lysine + ATP + ubiquitin -> [protein]-N-ubiquityllysine + AMP + PPi	EC:6.3.2.19
UBE2J1	ENSG00000198833	HMR_9491	[protein]-L-lysine + ATP + ubiquitin -> [protein]-N-ubiquityllysine + AMP + PPi	EC:6.3.2.19
UBE2K	ENSG00000078140	HMR_9491	[protein]-L-lysine + ATP + ubiquitin -> [protein]-N-ubiquityllysine + AMP + PPi	EC:6.3.2.19
UBE2L3	ENSG00000185651	HMR_9491	[protein]-L-lysine + ATP + ubiquitin -> [protein]-N-ubiquityllysine + AMP + PPi	EC:6.3.2.19
UBE2M	ENSG00000130725	HMR_9491	[protein]-L-lysine + ATP + ubiquitin -> [protein]-N-ubiquityllysine + AMP + PPi	EC:6.3.2.19
UBE2N	ENSG00000177889	HMR_9491	[protein]-L-lysine + ATP + ubiquitin -> [protein]-N-ubiquityllysine + AMP + PPi	EC:6.3.2.19
UBE2Q1	ENSG00000160714	HMR_9491	[protein]-L-lysine + ATP + ubiquitin -> [protein]-N-ubiquityllysine + AMP + PPi	EC:6.3.2.19
UBE2S	ENSG00000108106	HMR_9491	[protein]-L-lysine + ATP + ubiquitin -> [protein]-N-ubiquityllysine + AMP + PPi	EC:6.3.2.19
UBE4B	ENSG00000130939	HMR_9491	[protein]-L-lysine + ATP + ubiquitin -> [protein]-N-ubiquityllysine + AMP + PPi	EC:6.3.2.19
UBR4	ENSG00000127481	HMR_9491	[protein]-L-lysine + ATP + ubiquitin -> [protein]-N-ubiquityllysine + AMP + PPi	EC:6.3.2.19
UMPS	ENSG00000114491	HMR_4036|HMR_4577	H+ + orotidine-5-phosphate -> CO2 + UMP|orotidine-5-phosphate + PPi <=> orotate + PRPP	EC:2.4.2.10|EC:4.1.1.23
UQCR10	ENSG00000184076	HMR_6918	2 ferricytochrome C + 2 H+ + ubiquinol -> 2 ferrocytochrome C + ubiquinone + 4 H+	EC:1.10.2.2
UQCRB	ENSG00000156467	HMR_6918	2 ferricytochrome C + 2 H+ + ubiquinol -> 2 ferrocytochrome C + ubiquinone + 4 H+	EC:1.10.2.2
UQCRC1	ENSG00000010256	HMR_6918	2 ferricytochrome C + 2 H+ + ubiquinol -> 2 ferrocytochrome C + ubiquinone + 4 H+	EC:1.10.2.2
UQCRC2	ENSG00000140740	HMR_6918	2 ferricytochrome C + 2 H+ + ubiquinol -> 2 ferrocytochrome C + ubiquinone + 4 H+	EC:1.10.2.2
UQCRFS1	ENSG00000169021	HMR_6918	2 ferricytochrome C + 2 H+ + ubiquinol -> 2 ferrocytochrome C + ubiquinone + 4 H+	EC:1.10.2.2
UQCRH	ENSG00000173660	HMR_6918	2 ferricytochrome C + 2 H+ + ubiquinol -> 2 ferrocytochrome C + ubiquinone + 4 H+	EC:1.10.2.2
UROD	ENSG00000126088	HMR_4750|HMR_4772|r0774	4 H+ + uroporphyrinogen I -> 4 CO2 + coproporphyrinogen I|4 H+ + uroporphyrinogen I <=> 4 CO2 + coproporphyrinogen I|4 H+ + urop... <Preview truncated at 128 characters>	4.1.1.37|EC:4.1.1.37
USP10	ENSG00000103194	HMR_9490	H2O + ubiquitin C terminal thiolester -> H+ + thiol + ubiquitin	EC:3.1.2.15
USP14	ENSG00000101557	HMR_9490	H2O + ubiquitin C terminal thiolester -> H+ + thiol + ubiquitin	EC:3.1.2.15
USP22	ENSG00000124422	HMR_9490	H2O + ubiquitin C terminal thiolester -> H+ + thiol + ubiquitin	EC:3.1.2.15
USP35	ENSG00000118369	HMR_9490	H2O + ubiquitin C terminal thiolester -> H+ + thiol + ubiquitin	EC:3.1.2.15
USP36	ENSG00000055483	HMR_9490	H2O + ubiquitin C terminal thiolester -> H+ + thiol + ubiquitin	EC:3.1.2.15
USP37	ENSG00000135913	HMR_9490	H2O + ubiquitin C terminal thiolester -> H+ + thiol + ubiquitin	EC:3.1.2.15
USP48	ENSG00000090686	HMR_9490	H2O + ubiquitin C terminal thiolester -> H+ + thiol + ubiquitin	EC:3.1.2.15
USP5	ENSG00000111667	HMR_9490	H2O + ubiquitin C terminal thiolester -> H+ + thiol + ubiquitin	EC:3.1.2.15
USP8	ENSG00000138592	HMR_9490	H2O + ubiquitin C terminal thiolester -> H+ + thiol + ubiquitin	EC:3.1.2.15
UXS1	ENSG00000115652	HMR_4124|HMR_8672|HMR_8729	H+ + UDP-glucuronate -> CO2 + UDP-xylose|H2O + UDP-glucuronate -> glucuronate + H+ + UDP	EC:4.1.1.35
VARS	ENSG00000204394	HMR_5150	ATP + tRNA(val) + valine -> AMP + L-valyl-tRNA(val) + PPi	EC:6.1.1.9
VPS29	ENSG00000111237	HMR_3843	3-phosphoserine + H2O -> Pi + serine	EC:3.1.3.3
WARS	ENSG00000140105	HMR_5149	ATP + tRNA(trp) + tryptophan -> AMP + L-tryptophanyl-tRNA(trp) + PPi	EC:6.1.1.2
WEE1	ENSG00000166483	HMR_9577|HMR_9579	ATP + protamine -> ADP + O-phosphoprotamine|[protein] + ATP -> ADP + phosphoprotein	EC:2.7.11.1|EC:2.7.11.1; EC:2.7.11.8; EC:2.7.11.9; EC:2.7.11.10; EC:2.7.11.11; EC:2.7.11.12; EC:2.7.11.13; EC:2.7.11.17; EC:2.7.11.21; EC:2.7.11.22; EC:2.7.11.24; EC:2.7.11.25; EC:2.7.11.30; EC:2.7.12.1; EC:2.7.12.2
WNK1	ENSG00000060237	HMR_9577|HMR_9579	ATP + protamine -> ADP + O-phosphoprotamine|[protein] + ATP -> ADP + phosphoprotein	EC:2.7.11.1|EC:2.7.11.1; EC:2.7.11.8; EC:2.7.11.9; EC:2.7.11.10; EC:2.7.11.11; EC:2.7.11.12; EC:2.7.11.13; EC:2.7.11.17; EC:2.7.11.21; EC:2.7.11.22; EC:2.7.11.24; EC:2.7.11.25; EC:2.7.11.30; EC:2.7.12.1; EC:2.7.12.2
XYLT2	ENSG00000015532	HMR_7200	[protein]-L-serine + UDP-xylose -> H+ + UDP + Xyl-L-Ser-[protein]	EC:2.4.2.26
YARS	ENSG00000134684	HMR_5130	ATP + tRNA(tyr) + tyrosine -> AMP + L-tyrosyl-tRNA(tyr) + PPi	EC:6.1.1.1
YKT6	ENSG00000106636	HMR_1088|HMR_1091	CoA + H+ + N-acetyl-LTE4 <=> acetyl-CoA + leukotriene E4	EC:2.3.1.-
ZDHHC8	ENSG00000099904	HMR_1088|HMR_1091	CoA + H+ + N-acetyl-LTE4 <=> acetyl-CoA + leukotriene E4	EC:2.3.1.-
ZNRD1	ENSG00000066379	HMR_7161|HMR_7162	0.18 ADP + 0.3 CDP + 0.34 GDP + 0.18 UDP -> Pi + RNA|0.18 ATP + 0.3 CTP + 0.34 GTP + 0.18 UTP -> PPi + RNA	EC:2.7.7.6; EC:2.7.7.19; EC:2.7.7.52|EC:2.7.7.8

## Sheet: S5.3
Molecule NICEdrug ID	Molecule name	EC number	Pair of molecule EC is essential in human?
1467865752	Pyridoxal phosphate	4.3.3.6	No
1467866007	Oxaloacetate	1.1.1.37	No
1467866007	Oxaloacetate	1.1.1.299	No
1467866080	L-Alanine	4.4.1.1	No
1467866192	L-Aspartate	4.4.1.1	No
1467866276	CMP	2.7.4.14	No
1467866276	CMP	4.6.1.12	No
1467866345	L-Arginine	3.5.3.1	No
1467866507	Phosphoenolpyruvate	2.5.1.19	No
1467866549	L-Ornithine	4.1.1.17	Yes
1467866549	L-Ornithine	3.5.3.1	Yes
1467866648	Acetaldehyde	4.1.1.1	No
1467866662	D-Fructose 6-phosphate	3.1.3.25	No
1467866763	D-Glucose 6-phosphate	5.5.1.4	No
1467866778	sn-Glycerol 3-phosphate	2.3.1.15	No
1467866778	sn-Glycerol 3-phosphate	2.7.1.30	No
1467866997	2-Oxobutanoate	4.4.1.1	No
1467866997	2-Oxobutanoate	1.1.1.27	No
1467866997	2-Oxobutanoate	2.2.1.6	No
1467867087	Glycerol	2.7.1.30	No
1467867103	D-Ribose 5-phosphate	2.7.1.11	No
1467867117	D-Glyceraldehyde 3-phosphate	4.3.3.6	No
1467867147	Biotin	6.2.1.11	No
1467867342	Putrescine	4.1.1.17	No
1467867342	Putrescine	2.1.1.53	No
1467867373	Butanoyl-CoA	1.3.1.10	No
1467867385	myo-Inositol	3.1.3.25	No
1467867543	(S)-Malate	1.1.1.37	No
1467867543	(S)-Malate	1.1.1.299	No
1467867917	Thymine	2.4.2.2	Yes
1467868029	(S)-Lactate	1.1.1.27	No
1467868061	L-Threonine	1.17.7.3	No
1467868189	3-Phospho-D-glycerate	3.1.3.13	No
1467868222	D-Ribulose 5-phosphate	4.3.3.6	No
1467868376	Adenosine	2.4.2.1	No
1467868376	Adenosine	2.7.1.11	No
1467868402	Thymidine	2.4.2.2	No
1467868629	4-Methyl-2-oxopentanoate	4.1.1.1	No
1467869340	Quinate	1.1.1.282	Yes
1467869376	Uridine	2.4.2.2	No
1467869652	2-Oxoadipate	1.1.1.27	No
1467869751	Deoxyguanosine	2.4.2.1	No
1467869989	D-Glucosamine 6-phosphate	2.3.1.4	No
1467870021	D-Fructose 1,6-bisphosphate	2.7.1.11	No
1467870021	D-Fructose 1,6-bisphosphate	2.7.1.56	No
1467870068	N-Acetyl-D-glucosamine 6-phosphate	2.3.1.4	No
1467870385	Guanosine	2.4.2.1	No
1467870443	Mannitol	3.1.3.25	No
1467870654	Progesterone	1.1.1.51	No
1467870669	Sinapoyl-CoA	1.14.19.1	No
1467871033	Sedoheptulose 1,7-bisphosphate	2.7.1.11	No
1467871215	Acetoin	4.1.1.1	No
1467871406	Sinapate	1.14.19.1	No
1467871513	L-Cystine	4.4.1.1	No
1467871544	Shikimate	2.7.1.71	Yes
1467871544	Shikimate	1.1.1.25	Yes
1467871544	Shikimate	1.1.1.282	Yes
1467872331	Deoxyadenosine	2.4.2.1	No
1467872897	r1p	2.4.2.1	Yes
1467872897	r1p	2.4.2.2	Yes
1467872897	r1p	2.4.2.3	Yes
1467873168	D-Mannitol 1-phosphate	3.1.3.25	No
1467873274	2-Aceto-2-hydroxybutanoate	2.2.1.6	Yes
1467873324	beta-D-Fructose 2,6-bisphosphate	3.1.3.25	Yes
1467873324	beta-D-Fructose 2,6-bisphosphate	2.7.1.11	Yes
1467873411	2-Deoxy-D-ribose 1-phosphate	2.4.2.2	Yes
1467873411	2-Deoxy-D-ribose 1-phosphate	2.4.2.1	Yes
1467873411	2-Deoxy-D-ribose 1-phosphate	2.4.2.4	Yes
1467875044	Menaquinone	2.1.1.163	No
1467875068	Oxomalonate	1.1.1.27	Yes
1467875359	Deamino-NAD+	2.3.1.37	No
1467875551	Crotonoyl-CoA	1.3.1.10	No
1467875820	2-Acetolactate	2.2.1.6	Yes
1467876226	3-Dehydroquinate	4.2.1.10	Yes
1467876226	3-Dehydroquinate	1.1.1.282	Yes
1467876226	3-Dehydroquinate	4.2.3.4	Yes
1467876342	Mercaptopyruvate	1.1.1.27	No
1467877616	D-Fructose 1-phosphate	2.7.1.11	No
1467877616	D-Fructose 1-phosphate	2.7.1.56	No
1467878152	D-Ribose 1,5-bisphosphate	2.7.1.11	Yes
1467878239	2,3-Bisphospho-D-glycerate	3.1.3.13	No
1467878411	17alpha-Hydroxyprogesterone	1.1.1.51	Yes
1467878427	Inositol 1-phosphate	3.1.3.25	No
1467878427	Inositol 1-phosphate	5.5.1.4	No
1467878856	1D-myo-Inositol 1,4-bisphosphate	3.1.3.56	No
1467878934	Dehydroepiandrosterone	1.1.1.51	Yes
1467879075	1D-myo-Inositol 1,3,4-trisphosphate	3.1.3.56	No
1467879310	5-O-(1-Carboxyvinyl)-3-phosphoshikimate	2.5.1.19	Yes
1467879341	1D-myo-Inositol 1,3,4,5-tetrakisphosphate	3.1.3.56	No
1467884457	Aminoacetone	2.3.1.37	No
1467884457	Aminoacetone	1.17.7.3	No
1467884508	Biotinyl-CoA	6.2.1.11	Yes
1467885032	Pregnenolone	1.1.1.51	No
1467885109	Thiocysteine	4.4.1.1	Yes
1467885861	Phylloquinone	2.1.1.163	Yes
1467887730	Hydroxymalonate	1.1.1.27	Yes
1467888307	2-Hydroxyadipate	1.1.1.27	Yes
1467890251	3-Dehydroshikimate	4.2.1.10	Yes
1467890251	3-Dehydroshikimate	1.1.1.25	Yes
1467890251	3-Dehydroshikimate	1.1.1.282	Yes
1467890355	5-Dehydroshikimate	1.1.1.25	Yes
1467890895	N-Methylputrescine	2.1.1.53	Yes
1467894258	Shikimate 3-phosphate	2.7.1.71	Yes
1467894258	Shikimate 3-phosphate	2.5.1.19	Yes
1467894387	(R)-1-Aminopropan-2-ol	2.3.1.37	No
1467901239	S-Methyl-5-thio-D-ribose 1-phosphate	2.4.2.1	Yes
1467902019	Androstenediol	1.1.1.51	Yes
1467903533	17alpha,20alpha-Dihydroxypregn-4-en-3-one	1.1.1.51	Yes
1467904689	(1S,4S)-4-Hydroxy-3-oxocyclohexane-1-carboxylate	1.1.1.282	Yes
1467904867	(1S,3R,4S)-3,4-Dihydroxycyclohexane-1-carboxylate	1.1.1.282	Yes
1467904896	2-Dehydro-3-deoxy-D-arabino-heptonate 7-phosphate	4.2.3.4	Yes
1467908671	L-Selenomethionine	4.4.1.1	No
1467909038	Sedoheptulose 7-phosphate	2.7.1.11	No
1467910150	Deoxyinosine	2.4.2.1	No
1467910244	3-Sulfopyruvate	1.1.1.37	No
1467911611	Methaneselenol	4.4.1.1	No
1467912521	2-Demethylmenaquinone	2.1.1.163	Yes
1467912574	3-Mercaptolactate	1.1.1.27	Yes
1467913312	Biotinyl-5'-AMP	6.2.1.11	Yes
1467913936	2-Hydroxybutanoic acid	1.1.1.27	No
1467925690	3-Methylbutanal	4.1.1.1	No
1467970420	2-C-Methyl-D-erythritol 4-phosphate	2.7.7.60	Yes
1467970431	4-(Cytidine 5'-diphospho)-2-C-methyl-D-erythritol	2.7.7.60	Yes
1467970431	4-(Cytidine 5'-diphospho)-2-C-methyl-D-erythritol	2.7.1.148	Yes
1467970442	2-Phospho-4-(cytidine 5'-diphospho)-2-C-methyl-D-erythritol	2.7.1.148	Yes
1467970442	2-Phospho-4-(cytidine 5'-diphospho)-2-C-methyl-D-erythritol	4.6.1.12	Yes
1467970558	2-C-Methyl-D-erythritol 2,4-cyclodiphosphate	4.6.1.12	Yes
1467970558	2-C-Methyl-D-erythritol 2,4-cyclodiphosphate	1.17.7.3	Yes
1467970956	(S)-3-Sulfolactate	1.1.1.37	Yes
1467973290	5-Fluorodeoxyuridine	2.4.2.4	Yes
1467974028	1-Hydroxy-2-methyl-2-butenyl 4-diphosphate	1.17.7.3	Yes
1467981815	5'-Deoxy-5-fluorouridine	2.4.2.4	Yes
1467983144	2-Phytyl-1,4-naphthoquinone	2.1.1.163	Yes
1468012285	5-Fluorouridine	2.4.2.3	Yes
1468012320	5-Deoxyribose-1-phosphate	2.4.2.4	Yes
1468012454	3-Oxovalproic acid	2.3.1.20	Yes
1468040366	5'-S-Methyl-5'-thioinosine	2.4.2.1	Yes
1468040846	Demethylmenaquinol	2.1.1.163	Yes
1468044025	5-Androstene-3,17-dione	1.1.1.51	No
1468049482	18-Hydroxyoleoyl-CoA	2.3.1.15	No
1468181808	1-oleoyl-sn-glycero-3-phosphate(2-)	2.3.1.15	Yes
1468182046	1,2-dioleoylglycerol	2.3.1.20	No
1468189450	triolein	2.3.1.20	No
1468219387	2dmmql8	2.1.1.163	No
1468297174	1,2-dioleoyl-3-palmitoyl-sn-glycerol	2.3.1.20	Yes
1468335887	menaquinol-6	2.1.1.163	Yes
1468335911	2-demethylmenaquinol-6	2.1.1.163	Yes
1468335927	menaquinol-9	2.1.1.163	Yes
1468335935	2-demethylmenaquinol-9	2.1.1.163	Yes
1468335951	menaquinol-10	2.1.1.163	Yes
1468335959	2-demethylmenaquinol-10	2.1.1.163	Yes
1468335967	menaquinol-11	2.1.1.163	Yes
1468335975	2-demethylmenaquinol-11	2.1.1.163	Yes
1468335991	menaquinol-12	2.1.1.163	Yes
1468335999	2-demethylmenaquinol-12	2.1.1.163	Yes
1468336007	menaquinol-13	2.1.1.163	Yes
1468336015	2-demethylmenaquinol-13	2.1.1.163	Yes

## Sheet: S5.4
Molecule NICEdrug ID	Molecule name	EC number
1467870302	Xylitol	1.1.1.10,1.1.1.14,1.1.1.15,1.1.1.9,1.1.1.B19,1.1.1.11,1.1.1.12,1.1.1.13,1.1.1.56,1.1.1.250
1467870302	Xylitol	1.1.1.21,1.1.1.307,1.1.1.188,1.1.1.2
1467870302	Xylitol	1.1.1.9,1.1.1.15
1467873682	XTP	2.7.1.40
1467879855	XDP	2.7.1.40
1467873249	Xanthosine 5'-phosphate	1.1.1.205
1467873249	Xanthosine 5'-phosphate	2.4.2.8
1467873249	Xanthosine 5'-phosphate	2.4.2.8,2.4.2.22
1467873249	Xanthosine 5'-phosphate	6.3.5.2
1467873249	Xanthosine 5'-phosphate	6.3.5.2,6.3.4.1
1467870360	Xanthine	2.4.2.8
1467870360	Xanthine	2.4.2.8,2.4.2.22
1467933869	Vernolic acid	3.3.2.-,3.3.2,3.3.2.9,3.3.2.10
1467916588	Vanillyl alcohol	1.1.1.1
1467866522	UTP	1.17.4.1
1467866522	UTP	2.7.1.36
1467866522	UTP	2.7.1.36,2.7.1.40
1467866522	UTP	2.7.1.40
1467866522	UTP	2.7.2.3
1467866522	UTP	2.7.4.6
1467866522	UTP	2.7.7.6,2.7.7.48,2.7.7.52
1467866522	UTP	2.7.7.64,2.7.7.52,2.7.7.6
1467866522	UTP	3.6.1.8, 3.6.1.9,3.6.1.9,3.1.3.31,3.6.1.19
1467866522	UTP	6.3.4.2
1467877230	Uroporphyrinogen III	4.1.1.37
1467912042	Uroporphyrinogen I	4.1.1.37
1467869376	Uridine	2.A.41.2.3,2.A.41.2.6
1467866677	Urea	1.11.1.7
1467866677	Urea	3.5.3.11
1467866677	Urea	3.5.3.11,3.5.3.1
1467870164	Urate	1.11.1.7
1467870164	Urate	1.14.13.113,1.14.15.16
1467870164	Urate	3.A.1.208.7
1467866960	Uracil	2.4.2.9,2.4.2.10
1467866960	Uracil	4.2.1.70
1468308986	undecanoyl-CoA	1.3.8.7,1.3.99.-
1468308986	undecanoyl-CoA	2.3.1.16,1.1.1.211
1467866945	UMP	2.4.2.9,2.4.2.10
1467866945	UMP	2.7.4.14,2.7.4.22,2.7.4.4,3.6.1.10
1467866945	UMP	2.7.4.4
1467866945	UMP	2.7.8.15
1467866945	UMP	2.7.8.17,2.7.8.15
1467866945	UMP	3.1.11.2
1467866945	UMP	3.6.1.8, 3.6.1.9,3.6.1.9,3.1.3.31,3.6.1.19
1467866945	UMP	3.6.1.9,2.4.1.117
1467866945	UMP	4.1.1.23
546697544	UID:546697544	2.7.11.1
546697544	UID:546697544	2.7.11.17
546697544	UID:546697544	2.7.12.1
546697544	UID:546697544	2.7.12.2
546697544	UID:546697544	3.1.3.16
1467868090	UDP-D-xylose	2.4.2.24,2.4.2,2.4.2.26,2.4.2.32,2.4.2.38,2.4.2.-,3.6.1.10
1467868090	UDP-D-xylose	2.4.2.38,3.4.19.d,2.4.1.dh,2.4.2.26,2.4.2.24,2.7.7.37
1467868090	UDP-D-xylose	4.1.1.35
1467868090	UDP-D-xylose	4.1.1.35,4.1.1.67
1467885154	Ubiquinone-9	2.1.1.64
1468020254	Ubiquinone-8	2.1.1.64
1468020242	Ubiquinone-6	1.3.5.1
1468020242	Ubiquinone-6	2.1.1.64
1467969792	Ubiquinone-10	1.6.5.3
1468335078	ubiquinol-9	2.1.1.64
1468408334	Ubiquinol-8	2.1.1.64
1468335134	ubiquinol-7	2.1.1.64
1468185476	ubiquinol-6	1.10.2.2
1468185476	ubiquinol-6	1.3.5.1
1468185476	ubiquinol-6	2.1.1.64
1468233466	ubiquinol-10	1.6.5.3
1468233466	ubiquinol-10	2.1.1.64
1467871421	Tyramine	2.1.1.27,2.1.1.49,2.1.1.6
1467871421	Tyramine	2.8.2.1,2.8.2.3
1469334462	TuMP	2.7.4.3
1467870508	Tryptamine	2.1.1.49
1468189450	triolein	3.1.1.1,3.1.1.13,3.1.1.3,3.1.1.79
1467888960	Triiodothyronine	2.8.2.1
1468332702	tridecanoyl-CoA	1.3.8.7,1.3.8.8,1.3.8.9,1.3.99.-,
1468332702	tridecanoyl-CoA	2.3.1.16,1.1.1.211
1468332702	tridecanoyl-CoA	2.3.1.21,2.3.1.7
1468332702	tridecanoyl-CoA	3.1.2.2
1468332702	tridecanoyl-CoA	6.2.1.3
1468360155	tricosanoyl-CoA	2.3.1.21,2.3.1.7
1468360155	tricosanoyl-CoA	3.1.2.2
1468360155	tricosanoyl-CoA	6.2.1.3
1467921329	Trichloroethene	2.5.1.18
1467927073	Trichloroethanol	1.1.1.1
1467986320	Tributyrin	3.1.1.1
1467991134	Tributyl phosphate	2.7.11.24
1467891102	Triacetate lactone	2.3.1,2.3.1.39
1467871046	trans,trans-Farnesyl diphosphate	2.4.1.B51,2.5.1.87
1467871046	trans,trans-Farnesyl diphosphate	2.5.1.-,2.5.1.29,2.5.1
1467871046	trans,trans-Farnesyl diphosphate	2.5.1.1,2.5.1.10,2.5.1.29
1467871046	trans,trans-Farnesyl diphosphate	2.5.1.10
1467871046	trans,trans-Farnesyl diphosphate	2.5.1.10,2.5.1.20,2.5.1.68,2.5.1.1,2.5.1.31
1467871046	trans,trans-Farnesyl diphosphate	2.5.1.103,2.5.1.21,2.5.1.96,3.6.1.10
1467871046	trans,trans-Farnesyl diphosphate	2.5.1.21
1467871046	trans,trans-Farnesyl diphosphate	2.5.1.21,2.5.1.58,3.6.1.10
1467871046	trans,trans-Farnesyl diphosphate	2.5.1.58
1467871046	trans,trans-Farnesyl diphosphate	2.5.1.86,2.5.1.87,2.5.1.88,2.5.1.-
1467871046	trans,trans-Farnesyl diphosphate	2.5.1.86,2.5.1.91
1467871046	trans,trans-Farnesyl diphosphate	2.5.1.90,2.5.1.87
1467871046	trans,trans-Farnesyl diphosphate	2.5.1.92,2.5.1.10
1467871046	trans,trans-Farnesyl diphosphate	4.2.3.164,2.5.1,2.5.1.91,2.5.1.58
1467908207	trans,cis-Lauro-2,6-dienoyl-CoA	5.3.3.8
1467908207	trans,cis-Lauro-2,6-dienoyl-CoA	5.3.3.8,5.3.3.-
1467908150	trans-Tetradec-2-enoyl-CoA	1.3.1.8,1.3.1.38
1467908150	trans-Tetradec-2-enoyl-CoA	1.3.3.6
1467908150	trans-Tetradec-2-enoyl-CoA	1.3.3.6,1.3.8.7,1.3.8.8,1.3.8.9,,1.3.99,1.3.99.-
1467908150	trans-Tetradec-2-enoyl-CoA	1.3.3.6,3.6.1.10
1467908150	trans-Tetradec-2-enoyl-CoA	1.3.8.8
1467908150	trans-Tetradec-2-enoyl-CoA	1.3.8.8,1.3.99.3
1467908150	trans-Tetradec-2-enoyl-CoA	1.3.99.3
1467908150	trans-Tetradec-2-enoyl-CoA	4.2.1.17,4.2.1.74
1467908186	trans-Oct-2-enoyl-CoA	1.3.1.8,1.3.1.38
1467908186	trans-Oct-2-enoyl-CoA	1.3.3.6
1467908186	trans-Oct-2-enoyl-CoA	1.3.3.6,1.3.8.7,1.3.8.8,1.3.99.-,1.3.99
1467908186	trans-Oct-2-enoyl-CoA	1.3.3.6,3.6.1.10
1467908186	trans-Oct-2-enoyl-CoA	1.3.8.7,1.3.8.8
1467908186	trans-Oct-2-enoyl-CoA	1.3.8.8
1467908186	trans-Oct-2-enoyl-CoA	1.3.99.3
1467908186	trans-Oct-2-enoyl-CoA	4.2.1.17,4.2.1.74,4.2.1.119
1467908137	trans-Hexadec-2-enoyl-CoA	1.3.1.34
1467908137	trans-Hexadec-2-enoyl-CoA	1.3.1.8,1.3.1.38
1467908137	trans-Hexadec-2-enoyl-CoA	1.3.3.6
1467908137	trans-Hexadec-2-enoyl-CoA	1.3.3.6,1.3.8.7,1.3.8.8,1.3.8.9,,1.3.99,1.3.99.-
1467908137	trans-Hexadec-2-enoyl-CoA	1.3.3.6,3.6.1.10
1467908137	trans-Hexadec-2-enoyl-CoA	1.3.8.8
1467908137	trans-Hexadec-2-enoyl-CoA	1.3.99.3
1467908137	trans-Hexadec-2-enoyl-CoA	4.2.1.17,4.2.1.74
1467908124	trans-Hex-2-enoyl-CoA	1.3.1.8,1.3.1.38
1467908124	trans-Hex-2-enoyl-CoA	1.3.3.6
1467908124	trans-Hex-2-enoyl-CoA	1.3.3.6,1.3.8.7,1.3.8.8,1.3.8.1,,1.3.8.5
1467908124	trans-Hex-2-enoyl-CoA	1.3.3.6,3.6.1.10
1467908124	trans-Hex-2-enoyl-CoA	1.3.8.7,1.3.8.8
1467908124	trans-Hex-2-enoyl-CoA	1.3.99.3
1467908124	trans-Hex-2-enoyl-CoA	4.2.1.17,4.2.1.74
1468122499	trans-dec-3-enoyl-CoA	1.3.1.34
1468122499	trans-dec-3-enoyl-CoA	2.3.1.16
1468122499	trans-dec-3-enoyl-CoA	5.3.3.8
1467908174	trans-Dec-2-enoyl-CoA	1.1.1,1.3.99.3
1467908174	trans-Dec-2-enoyl-CoA	1.3.1.8,1.3.1.38
1467908174	trans-Dec-2-enoyl-CoA	1.3.3.6
1467908174	trans-Dec-2-enoyl-CoA	1.3.3.6,1.3.8.7,1.3.8.8,1.3.99.-,1.3.99
1467908174	trans-Dec-2-enoyl-CoA	1.3.3.6,3.6.1.10
1467908174	trans-Dec-2-enoyl-CoA	1.3.8.7,1.3.8.8
1467908174	trans-Dec-2-enoyl-CoA	1.3.99.3
1467908174	trans-Dec-2-enoyl-CoA	4.2.1.17,4.2.1.74
1467908174	trans-Dec-2-enoyl-CoA	5.3.3.8
1467870801	trans-Cinnamate	1.2.1.3
1468038949	trans-5,6-Dihydro-5,6-dihydroxy-7,12-dimethylbenz[a]anthracene	3.3.2.9
1468037879	trans-3,4-Dihydro-3,4-dihydroxy-7,12-dimethylbenz[a]anthracene	3.3.2.9
1468337612	trans-3-hexenoyl-CoA	1.3.1.34
1467919639	trans-3-Chloroallyl aldehyde	1.1.1.1
1467919639	trans-3-Chloroallyl aldehyde	1.2.1.3
1467919650	trans-3-Chloroacrylic acid	1.2.1.3
1467919616	trans-3-Chloro-2-propene-1-ol	1.1.1.1
1468308970	trans-2-pentadecenoyl-CoA	1.3.8.7,1.3.8.8,1.3.8.9,1.3.99.-,
1467975539	trans-2-Methyl-5-isopropylhexa-2,5-dienoyl-CoA	4.2.1.17,4.2.1.18,5.3.3.-,5.3.3.8
1468291425	trans-2-icosenoyl-CoA	4.2.1.134,4.2.1.17
1468009387	trans-2-Enoyl-OPC8-CoA	1.3.3.6
1468009387	trans-2-Enoyl-OPC8-CoA	4.2.1.17,4.2.1.74
1468009423	trans-2-Enoyl-OPC6-CoA	1.3.3.6
1468009423	trans-2-Enoyl-OPC6-CoA	4.2.1.17,4.2.1.74
1468009459	trans-2-Enoyl-OPC4-CoA	1.3.3.6
1468009459	trans-2-Enoyl-OPC4-CoA	4.2.1.17,4.2.1.74
1467883902	Thyroxine	2.8.2.1
1467868402	Thymidine	2.A.41.2.3,2.A.41.2.6
1467888492	Thiopurine	2.4.2.8
1467928712	Thioguanine	2.4.2.8
1467883279	Thiocyanate	1.11.1.7,1.2.4.4,1.8.1.4
1467877492	Thiamin monophosphate	2.7.4.16,2.7.4.9
1467866431	Thiamin diphosphate	1.2.4.1
1467866431	Thiamin diphosphate	1.2.4.1, 2.2.1.6, 4.1.1.1,2.2.1.6,4.1.1.1
1467866431	Thiamin diphosphate	1.2.4.1,1.2.4.4
1467866431	Thiamin diphosphate	1.2.4.1,3.6.1.10
1467866431	Thiamin diphosphate	1.2.4.1,4.1.1.1
1467866431	Thiamin diphosphate	1.2.4.2
1467866431	Thiamin diphosphate	1.2.4.4
1467866431	Thiamin diphosphate	2.2.1.1
1467866431	Thiamin diphosphate	2.2.1.1,2.2.1.3
1467866431	Thiamin diphosphate	2.7.4.16,2.7.4.9
1467866431	Thiamin diphosphate	4.1.1.71,4.1.1.1,1.2.4.4
1469339975	Thiamin diphosphate	1.2.4.2
1469339975	Thiamin diphosphate	2.7.4.16,2.7.4.9
1467896746	THF-polyglutamate	2.1.1.13,2.1.1.14
1467896746	THF-polyglutamate	6.3.2.17
1467945595	THF-L-glutamate	6.3.2.17
1467866885	Tetrahydrofolate	1.4.4.2, 1.8.1.4, 2.1.2.10,1.8.1.4,2.1.2.10
1467866885	Tetrahydrofolate	1.4.4.2,3.6.1.10
1467866885	Tetrahydrofolate	1.5.1.3
1467866885	Tetrahydrofolate	1.5.1.3,1.17.99.4
1467866885	Tetrahydrofolate	1.5.1.3,1.5.1.34
1467866885	Tetrahydrofolate	1.5.1.3,1.5.1.5
1467866885	Tetrahydrofolate	1.5.1.3,2.1.1.148
1467866885	Tetrahydrofolate	2.1.1.13
1467866885	Tetrahydrofolate	2.1.1.45
1467866885	Tetrahydrofolate	2.1.2.1
1467866885	Tetrahydrofolate	2.1.2.10
1467866885	Tetrahydrofolate	2.1.2.2
1467866885	Tetrahydrofolate	2.1.2.3
1467866885	Tetrahydrofolate	2.1.2.9
1467866885	Tetrahydrofolate	6.3.2.17
1467866885	Tetrahydrofolate	6.3.4.3
1467866885	Tetrahydrofolate	6.3.4.3,3.5.4.9
1468708788	Tetrahydro-m-cresol	1.1.1.1
1467889952	Tetradecanoyl-CoA	1.14.19.1
1467889952	Tetradecanoyl-CoA	1.3.1.8,1.3.1.38
1467889952	Tetradecanoyl-CoA	1.3.3.6
1467889952	Tetradecanoyl-CoA	1.3.3.6,1.3.8.7,1.3.8.8,1.3.8.9,,1.3.99,1.3.99.-
1467889952	Tetradecanoyl-CoA	1.3.3.6,3.6.1.10
1467889952	Tetradecanoyl-CoA	1.3.8.8
1467889952	Tetradecanoyl-CoA	1.3.8.8,1.3.99.3
1467889952	Tetradecanoyl-CoA	1.3.99.3
1467889952	Tetradecanoyl-CoA	2.3.1,2.3.1.97,2.3.1.225,2.3.1.9
1467889952	Tetradecanoyl-CoA	2.3.1.16
1467889952	Tetradecanoyl-CoA	2.3.1.16,2.3.1.155,1.1.1.211,3.6.1.10
1467889952	Tetradecanoyl-CoA	2.3.1.50
1467889952	Tetradecanoyl-CoA	2.3.1.51
1467889952	Tetradecanoyl-CoA	2.3.1.86
1467889952	Tetradecanoyl-CoA	2.3.1.97
1467889952	Tetradecanoyl-CoA	3.1.2.2
1467889952	Tetradecanoyl-CoA	6.2.1.3
1467917663	Tetradecanoic acid	2.3.1.41
1467917663	Tetradecanoic acid	2.3.1.85
1467917663	Tetradecanoic acid	3.1.2.14,3.1.2.21
1467917663	Tetradecanoic acid	3.1.2.2
1467917663	Tetradecanoic acid	3.5.1,3.1.2.14,3.1.1.32,3.1.1.4
1468011314	Tetracosenoyl-CoA	1.3.3.6
1468011314	Tetracosenoyl-CoA	2.3.1.16
1468011314	Tetracosenoyl-CoA	2.3.1.199
1468011314	Tetracosenoyl-CoA	2.3.1.21,2.3.1.7
1468011314	Tetracosenoyl-CoA	3.1.2.2
1468011314	Tetracosenoyl-CoA	6.2.1.3
1468011282	Tetracosanoyl-CoA	2.3.1.199
1468011282	Tetracosanoyl-CoA	2.3.1.21,2.3.1.7
1468011282	Tetracosanoyl-CoA	3.1.2.-,3.1.2,3.1.2.2
1468011282	Tetracosanoyl-CoA	6.2.1.3
1467933316	Tetracosanoic acid	2.3.1.85
1467933316	Tetracosanoic acid	3.1.2.-,3.1.2,3.1.2.2
1467933316	Tetracosanoic acid	3.A.1.211.1
1467933316	Tetracosanoic acid	6.2.1.3
1467872060	Testosterone	1.1.1.51,1.1.1.64,1.1.1.184,1.1.1.62,1.1.1.239,3.6.1.10
1467872060	Testosterone	1.1.1.62
1467872060	Testosterone	1.3.1.22,1.3.1.3,1.3.99.5
1468232830	tert-butyl hydroperoxide	1.11.1.15
1468232830	tert-butyl hydroperoxide	1.11.1.9
1468092040	tert-Butyl alcohol	1.11.1.15
1468092040	tert-Butyl alcohol	1.11.1.9
1468216604	TDP	2.7.2.3
1469357035	tdecoa	1.14.19.1
1469357035	tdecoa	1.3.3.6
1469357035	tdecoa	1.3.8.7,1.3.8.8,1.3.8.9,1.3.99.-,
1469357035	tdecoa	2.3.1.16,1.1.1.211
1469357035	tdecoa	2.3.1.21,2.3.1.7
1469357035	tdecoa	3.1.2.2
1469357035	tdecoa	6.2.1.3
1467907133	Taurocholate	3.A.1.201.2
1467909731	Taurochenodeoxycholate	3.A.1.201.2,3.A.1.208.8
1467868789	Taurine	2.3.2.2
1467917143	sym-Homospermidine	2.5.1.44,2.5.1.45,2.5.1.46
1467917143	sym-Homospermidine	2.5.1.45,2.5.1.46
1467917143	sym-Homospermidine	2.5.1.46
1467866691	Sulfur	2.8.1.8
1467866306	Sulfate	2.5.1.18
1467866715	Sucrose	2.7.11.21
1467866715	Sucrose	3.2.1.10,3.2.1.20,3.2.1.48
1467866715	Sucrose	3.2.1.20,3.2.1.10,3.2.1.48,3.2.1.26,2.4.1.10,3.6.1.10
1467866749	Succinyl-CoA	2.3.1.16,2.3.1.174
1467866749	Succinyl-CoA	2.3.1.37
1467866749	Succinyl-CoA	2.3.1.61
1467866749	Succinyl-CoA	3.1.2.3,3.1.2.2
1467866749	Succinyl-CoA	6.2.1.4
1467866749	Succinyl-CoA	6.2.1.5
1467866095	Succinate	1.2.4.1,3.6.1.10
1467866095	Succinate	1.3.5.1
1467866095	Succinate	1.3.5.1,1.3.5.4
1467866095	Succinate	1.3.5.1,3.6.1.10
1467866095	Succinate	2.A.29.7.2
1467866095	Succinate	3.1.2.3,3.1.2.2
1467866095	Succinate	6.2.1.4
1467866095	Succinate	6.2.1.5
1467870680	Stearoyl-CoA	1.14.19.1
1467870680	Stearoyl-CoA	1.3.1.38,1.3.1.93,1.3.1,3.6.1.10
1467870680	Stearoyl-CoA	1.3.3.6
1467870680	Stearoyl-CoA	1.3.8.7,1.3.8.8,1.3.8.9,1.3.99.-,
1467870680	Stearoyl-CoA	1.3.8.8
1467870680	Stearoyl-CoA	2.3.1.16,1.1.1.211
1467870680	Stearoyl-CoA	2.3.1.199
1467870680	Stearoyl-CoA	2.3.1.51
1467870680	Stearoyl-CoA	2.3.1.86
1467870680	Stearoyl-CoA	3.1.2.2
1467870680	Stearoyl-CoA	6.2.1.3
1468009082	Stearidonic acid	1.14.19,1.14.19.3
1467874171	Squalene	1.3.1.96,2.5.1.21
1467874171	Squalene	2.5.1.21
1467915175	Sphingosine 1-phosphate	3.1.3.4,1.14.18.5, 3.1.3.-,3.1.3.-,3.1.3
1467869624	Sphingosine	3.1.3.4,1.14.18.5, 3.1.3.-,3.1.3.-,3.1.3
1467877881	Sphinganine 1-phosphate	3.1.3.4
1467877881	Sphinganine 1-phosphate	3.1.3.4, 3.1.3.-,3.1.3.-
1467875124	Sphinganine	1.1.1.102
1467875124	Sphinganine	3.1.3,3.1.3.4
1467875124	Sphinganine	3.1.3.4
1467875124	Sphinganine	3.1.3.4, 3.1.3.-,3.1.3.-
1467875124	Sphinganine	3.5.1.23,3.1.3.4
1467874158	Spermine	2.5.1.16,2.5.1.22
1467874158	Spermine	2.5.1.22
1467869584	Spermidine	2.5.1.16
1467869584	Spermidine	2.5.1.16,2.5.1.22
1467869584	Spermidine	2.5.1.22
1467869584	Spermidine	2.5.1.44,2.5.1.45,2.5.1.46
1467869584	Spermidine	2.5.1.46
1467892046	Sorbose 1-phosphate	4.1.2.13
1467880624	Sorbose	1.1.1.406,1.1.1.15,1.1.1.16,1.1.1.407,1.1.1.12
1467879821	Sodium cation	2.A.18.6.5
1467879821	Sodium cation	2.A.18.6.7
1467879821	Sodium cation	2.A.31.2.1,2.A.31.2.8,2.6.1.7
1467879821	Sodium cation	2.A.41.2.3,2.A.41.2.6
1467879821	Sodium cation	2.A.41.2.4,2.A.41.2.6
1467879821	Sodium cation	2.A.47.1.9,2.A.29.7.2,2.A.47.1.4
1467879821	Sodium cation	2.A.57,2.A.41.2.3,2.A.41.2.4,2.A.41.2.6
1467879821	Sodium cation	3.6.3.9
1467879821	Sodium cation	3.6.3.9,3.A.3.1.1
1467866778	sn-Glycerol 3-phosphate	2.7.8.5
1467866778	sn-Glycerol 3-phosphate	2.7.8.5,2.7.8.8
1467967763	SN-38	3.1.1.1
1468589642	SLN-1C	2.1.1.6
1467930362	Sirolimus	2.7.11.1
1467870669	Sinapoyl-CoA	6.2.1.12,1.14.19.1,6.2.1
1467910810	Sinapoyl aldehyde	1.11.1.7,1.2.1.68,1.11.1.21,1.2.1
1467871406	Sinapate	1.11.1.7,1.2.1.68,1.11.1.21,1.2.1
1467871406	Sinapate	6.2.1.12,1.14.19.1,6.2.1
1467928330	Silymarin	2.8.2.1
1467874480	Serotonin	2.1.1.49
1467874480	Serotonin	2.8.2.1
1468292253	Ser-Leu	3.4.11.1
1468059005	sepi	2.7.9.3
1467907499	Selenophosphoric acid	2.7.9.3
1467911581	Selenohomocysteine	2.1.1.13,2.1.1.14
1467911581	Selenohomocysteine	3.3.1.1
1467911461	Selenite	1.8.1.9,1.8.1.2
1467909038	Sedoheptulose 7-phosphate	2.2.1.1
1467909038	Sedoheptulose 7-phosphate	2.2.1.1,2.2.1.3
1467909038	Sedoheptulose 7-phosphate	2.2.1.2,2.2.1.1
1467909038	Sedoheptulose 7-phosphate	3.6.1.10,2.2.1.1
1467871033	Sedoheptulose 1,7-bisphosphate	4.1.2.13
1467871033	Sedoheptulose 1,7-bisphosphate	4.1.2.13,4.1.2
1467929143	Secalciferol	1.14.15.16
1467929143	Secalciferol	1.14.15.16,1.14.13.126
1467911503	Se-Methylselenomethionine	1.18.6.1,2.1.1.12,6.1.1.10,1.3.5.5,1.3.99.28,1.3.99.29,1.3.99.30,
1467911492	Se-Methyl-L-selenocysteine	2.3.2.2
1467911513	Se-Adenosylselenomethionine	2.1.1.37
1467911513	Se-Adenosylselenomethionine	2.5.1.6
1467911523	Se-Adenosyl-L-selenohomocysteine	2.1.1.37
1467911523	Se-Adenosyl-L-selenohomocysteine	3.3.1.1
1467911480	scys-L	6.1.1.16
1468301020	sapienate	1.14.19.3
1467874758	Salicylate	3.1.1.1
1469396293	salicyl-6-hydroxy-2-cyclohexene-on-oyl	3.1.1.1
1467887980	Salicyl alcohol	3.1.1.1
1468080056	S(8)-glutaryldihydrolipoamide	1.2.4.2
1468080056	S(8)-glutaryldihydrolipoamide	2.3.1.61
1468174252	S(8)-aminomethyldihydrolipoamide	1.4.4.2
1468174252	S(8)-aminomethyldihydrolipoamide	2.1.2.10
1467878346	S-Succinyldihydrolipoamide	1.2.4.2
1467878346	S-Succinyldihydrolipoamide	2.3.1.61
1469370604	S-methylcysteine	6.3.2.2
1467910224	S-Glutathionyl-L-cysteine	1.8.1.10,1.8.1.9,1.8.4.2
1467877039	S-Formylglutathione	1.1.1.284,1.1.1.1
382536806	S-Adenosyl-L-methionine	2.1.1.114
382536806	S-Adenosyl-L-methionine	2.1.1.201
382536806	S-Adenosyl-L-methionine	2.1.1.201,2.1.1.163
382536806	S-Adenosyl-L-methionine	2.1.1.27,2.1.1.49,2.1.1.6
382536806	S-Adenosyl-L-methionine	2.1.1.37
382536806	S-Adenosyl-L-methionine	2.1.1.49
382536806	S-Adenosyl-L-methionine	2.1.1.6
382536806	S-Adenosyl-L-methionine	2.1.1.64
1467878026	S-Acetyldihydrolipoamide	1.2.4.1
1467878026	S-Acetyldihydrolipoamide	2.3.1.12,2.3.1.168
29757739	S-[2-[3-[[(2R)-4-[[[(2R,3S,4R,5R)-5-(6-aminopurin-9-yl)-4-hydroxy-3-phosphonooxy-tetrahydrofuran-2-yl]methoxy-hydroxy-phosphoryl]oxy-hydroxy-phosphoryl]oxy-2-hydroxy-3,3-dimethyl-butanoyl]amino]propanoylamino]ethyl] 3-(1H-indol-3-yl)propanethioate	1.3.8.7
1467969012	S-(PGA1)-glutathione	2.5.1.18
1467988355	S-(Hydroxymethyl)glutathione	1.1.1.284,1.1.1.1
1467995909	S-(Formylmethyl)glutathione	2.5.1.18
1468589561	S-(9-deoxy-delta9,12-PGD2)-glutathione	1.1.1.188
1468589561	S-(9-deoxy-delta9,12-PGD2)-glutathione	2.5.1.18
1468589549	S-(9-deoxy-delta12-PGD2)-glutathione	1.1.1.188
1468589549	S-(9-deoxy-delta12-PGD2)-glutathione	2.5.1.18
1467907124	S-(3-Methylbutanoyl)-dihydrolipoamide	1.2.4.4
1467967786	S-(2,4-Dinitrophenyl)glutathione	2.5.1.18
1467995807	S-(2,2-Dichloro-1-hydroxy)ethyl glutathione	2.5.1.18
1467902864	S-(2-Methylpropanoyl)-dihydrolipoamide	1.2.4.4
1467907115	S-(2-Methylbutanoyl)-dihydrolipoamide	1.2.4.4
1467995836	S-(2-Chloroacetyl)glutathione	2.5.1.18
1468589537	S-(11-OH-9-deoxy-delta9,12-PGD2)-glutathione	1.1.1.188
1468589525	S-(11-hydroxy-9-deoxy-delta12-PGD2)-glutathione	1.1.1.188
1467995877	S-(1,2-Dichlorovinyl)glutathione	2.5.1.18
1468275493	Roseoflavin	2.7.1.26
1469360422	ricinoleoyl-CoA	2.3.1.199
1469360422	ricinoleoyl-CoA	2.3.1.23
1467906853	Ribulose	1.1.1.10,1.1.1.14,1.1.1.15,1.1.1.9,1.1.1.B19,1.1.1.11,1.1.1.12,1.1.1.13,1.1.1.56,1.1.1.250
1467906853	Ribulose	1.1.1.9,1.1.1.15
1467868938	Riboflavin	2.7.1.26
1468196579	Riboflavin	2.7.1.26
1467889896	Retinyl palmitate	3.1.1.1,3.1.1.-,3.1.1.63
1467871291	Retinol	1.1.1.1, 1.1.1.105,1.1.1.105,1.1.1.315,1.1.1.-,3.6.1.10,1.1.1
1467871291	Retinol	1.1.1.105
1467871291	Retinol	1.1.1.105,1.1.1.2
1467871291	Retinol	1.1.1.300
1467871291	Retinol	1.1.1.300,1.1.1.-,1.1.1,1.1.1.105,3.6.1.10
1467871291	Retinol	1.2.1.3
1467871291	Retinol	3.1.1.1
1467871291	Retinol	3.1.1.1,3.1.1.-,3.1.1.63
1467871291	Retinol	3.2.1.31,3.1.1.1,3.1.1.3,3.1.1.64
1467874429	Retinoate	1.2.1.3
1467874429	Retinoate	2.A.1.13.1
1467870261	Retinal	1.1.1.1, 1.1.1.105,1.1.1.105,1.1.1.315,1.1.1.-,3.6.1.10,1.1.1
1467870261	Retinal	1.1.1.105
1467870261	Retinal	1.1.1.300
1467870261	Retinal	1.1.1.300,1.1.1.-,1.1.1,1.1.1.105,3.6.1.10
1467870261	Retinal	1.1.1.315
1468218154	q8h2	1.10.2.2
1468218154	q8h2	1.6.5.3
1468218154	q8h2	2.1.1.64
1467872953	Pyridoxine phosphate	2.7.1.35
1467872953	Pyridoxine phosphate	2.7.1.35,2.7.1.49
1467869570	Pyridoxine	2.7.1.35
1467869570	Pyridoxine	2.7.1.35,2.7.1.49
1467873194	Pyridoxamine phosphate	2.7.1.35
1467873194	Pyridoxamine phosphate	2.7.1.35,2.7.1.49
1467872046	Pyridoxamine	2.7.1.35
1467872046	Pyridoxamine	2.7.1.35,2.7.1.49
1467865752	Pyridoxal phosphate	2.7.1.35
1467868867	Pyridoxal	2.7.1.35
1467871394	Pyrazole	2.1.1.49
1467867342	Putrescine	2.5.1.16
1467867342	Putrescine	2.5.1.44,2.5.1.45,2.5.1.46
1467867342	Putrescine	2.5.1.45,2.5.1.46
1467867342	Putrescine	2.5.1.46
1467867342	Putrescine	3.5.3.11
1467867342	Putrescine	3.5.3.11,3.5.3.1
2647860279	PUBCHEM135421946	2.7.4.8
1467878335	Pseudouridine 5'-phosphate	4.2.1.70
1467877470	Protoporphyrinogen IX	2.5.1.18
1467913700	Prostaglandin J2	1.1.1.188
1467870840	Prostaglandin H2	1.1.1.188
1467870840	Prostaglandin H2	1.14.99.1
1467913685	Prostaglandin G2	1.14.99.1
1467873094	Prostaglandin F2alpha	1.1.1.188
1467873639	Prostaglandin D2	1.1.1.188
1467873639	Prostaglandin D2	1.1.1.188,1.1.1.62,1.3.1.20
1467913644	Prostaglandin A2	1.1.1.188
1467874744	Propynoate	1.2.1.3
1467875744	Propenoyl-CoA	1.3.3.6
1467875744	Propenoyl-CoA	1.3.8.7
1467875744	Propenoyl-CoA	1.3.8.7,1.3.8.1,1.3.99.3
1467875744	Propenoyl-CoA	4.2.1.17
1467875744	Propenoyl-CoA	4.2.1.17,4.2.1.116
1467867736	Propanoate	1.1.1.1
1467867736	Propanoate	1.2.1.19,1.2.1.22,1.2.1.24,1.2.1.26,1.2.1.28,1.2.1.3,1.2.1.31,1.2.1.32,1.2.1.36,1.2.1.48,1.2.1.5,1.2.1.69,1.2.1.8,1.2.1.88,1.2.1,3.6.1.10
1467867736	Propanoate	1.2.1.3
1467867736	Propanoate	1.2.1.3,3.6.1.10
1467867736	Propanoate	2.A.1.13.1
1467867736	Propanoate	3.1.1.1,3.1.1.2,3.5.1.4
1467867736	Propanoate	3.1.2.17,3.1.2.18,3.1.2.20,3.1.2.23,2.3.1.16,2.3.1.226,2.3.1.30,2.3.3.13,3.1.2.2
1467867736	Propanoate	6.2.1.1,6.2.1.17,3.1.2.2
1467913883	Propane-1-ol	1.1.1.1,3.6.1.10
1467913883	Propane-1-ol	1.1.1.202,1.1.1.1,3.6.1.10
1467871372	Propanal	1.1.1.1
1467871372	Propanal	1.1.1.1,3.6.1.10
1467871372	Propanal	1.1.1.202,1.1.1.1,3.6.1.10
1467871372	Propanal	1.2.1.19,1.2.1.22,1.2.1.24,1.2.1.26,1.2.1.28,1.2.1.3,1.2.1.31,1.2.1.32,1.2.1.36,1.2.1.48,1.2.1.5,1.2.1.69,1.2.1.8,1.2.1.88,1.2.1,3.6.1.10
1467871372	Propanal	1.2.1.3
1467884051	Propan-2-ol	1.1.1.80,1.1.1.1
1467870654	Progesterone	1.3.1.22
1467870654	Progesterone	1.3.1.22,1.3.1.3,1.3.99.6,1.3.1,1.3.1.30,3.6.1.10
1467967849	Prochloraz	3.1.2.27,2.3.1.65
1468176721	pristanoyl-CoA	5.1.99.4
1468176721	pristanoyl-CoA	6.2.1.3,6.2.1.-
1467896011	Presqualene diphosphate	1.3.1.96,2.5.1.21
1467896011	Presqualene diphosphate	2.5.1.103,2.5.1.21,2.5.1.96,3.6.1.10
1467896011	Presqualene diphosphate	2.5.1.21
1467868924	Prephenate	2.6.1.57,2.6.1.78,2.6.1.1
1467868924	Prephenate	2.6.1.79,2.6.1.1
1467880189	Prenol	1.1.1.1
1467885032	Pregnenolone	1.14.15.16,1.14.99.9
1467885032	Pregnenolone	1.14.15.6
1467885032	Pregnenolone	1.14.15.6,1.14.15.4
1467867056	PQQ	1.1.1.1,1.1.99.8
1467868704	Potassium cation	3.6.3.9
1467868704	Potassium cation	3.6.3.9,3.A.3.1.1
1467876094	Porphobilinogen	2.5.1.61,3.6.1.10
1467876094	Porphobilinogen	4.2.1.24
1467870783	Polysaccharide	2.4.1.1
1467870783	Polysaccharide	3.2.1.1
1467870783	Polysaccharide	3.2.1.1,3.1.11.7
1467870783	Polysaccharide	3.2.1.1,3.2.1.133
1467870783	Polysaccharide	3.2.1.1,3.2.1.2,3.2.1.133,3.2.1.4
1467870783	Polysaccharide	3.2.1.25,3.2.1.3,3.2.1.10
1467870783	Polysaccharide	3.2.1.74,3.2.1,3.2.1.1,3.2.1.20,3.2.1.21,3.6.1.10
1467870577	Polyphosphate	2.7.4.3
1467870577	Polyphosphate	3.6.1.11,3.6.1.1,3.1.3.2
1467870577	Polyphosphate	3.6.1.25,2.5.1.6
1468541216	PIP(38:4)	2.7.1.67
1468541216	PIP(38:4)	3.1.3.67
1467880176	Phytol	1.1.1.1
1467878694	Phytic acid	2.7.1.140,2.7.1.151
1467878694	Phytic acid	2.7.1.158
1467878694	Phytic acid	2.7.4.21
1467878694	Phytic acid	2.7.4.24,2.7.4.21
1467878694	Phytic acid	3.1.3.62,3.6.1.52
1467878694	Phytic acid	3.6.1.52
1469404649	phytenate	1.2.1.3,1.2.1.48
1468741641	Phytal	1.1.1.1
1468741641	Phytal	1.2.1.3,1.2.1.48
124122780	phosphono [(2R,3R,4S,5S,6R)-3,4,5-trihydroxy-6-(hydroxymethyl)-2-oxanyl] hydrogen phosphate	5.4.2.2,5.4.2.5,5.4.2.6,5.2.2.2,5.4.2.8
1467866507	Phosphoenolpyruvate	2.7.1.40
1467866507	Phosphoenolpyruvate	2.7.1.40,2.7.3.9
1467866507	Phosphoenolpyruvate	2.A.29.7.2
1467866507	Phosphoenolpyruvate	4.2.1.11
1467902132	Phosphoenol-4-deoxy-3-tetrulosonate	4.2.1.11
1468097899	Phosphatidylglycerol	3.1.3.27
1469360212	Phosphatidylethanolamine	4.1.1.65
1469360246	Phosphatidylethanolamine	4.1.1.65
1467883142	Phloretate	1.11.1.7
1467867780	Phenylpyruvate	2.6.1.1, 2.6.1.5, 2.6.1.9, 2.6.1.57,2.6.1.5,2.6.1.57,2.6.1.9,2.6.1.21,2.6.1.24
1467867780	Phenylpyruvate	2.6.1.58,2.6.1.57
1467867780	Phenylpyruvate	2.6.1.70,2.6.1.57
1469397933	phenylmethanesulfenate	2.7.11.13
1467912893	Phenylethyl alcohol	1.1.1.90,1.1.1.71,1.1.1.1
1467872719	Phenylacetaldehyde	1.1.1.90,1.1.1.71,1.1.1.1
1467867498	Phenol	2.8.2.1
1468284032	Phe-Tyr	3.4.11.2
1468267968	Phe-Ser	3.4.11.2
1468278110	Phe-Phe	3.6.1.10,3.4.11.2,3.4.13
1468366547	Phe-Leu	3.4.11.2
1468284016	Phe-Gly	3.4.11.2
1468291593	Phe-Glu	3.4.11.2
1469319789	PGP(34:1)	3.1.3.27
1469319879	PGP	2.7.8.5
1469320548	PGP	2.7.8.5
1469320548	PGP	3.1.3.27
1469320637	PGP	2.7.8.5
1468589447	PGH3	1.14.99.1
1467990572	Permethrin	3.1.1.1,3.6.1.10
1467889823	Perillyl aldehyde	1.2.1.3
1467975299	Perillic acid	1.2.1.3
1467875694	Pentanoyl-CoA	2.3.1.16,1.1.1.211
1467874723	Pentanoate	1.2.1.3
1468099267	pentanal	1.2.1.3
1468099586	pentan-3-one	1.1.1.1
1467884986	Pentan-2-one	1.1.1.1
1468288786	pentadecanoyl-CoA	1.3.8.7,1.3.8.8,1.3.8.9,1.3.99.-,
1468288786	pentadecanoyl-CoA	2.3.1.16,1.1.1.211
1468288786	pentadecanoyl-CoA	2.3.1.21,2.3.1.7
1468288786	pentadecanoyl-CoA	3.1.2.2
1468288786	pentadecanoyl-CoA	6.2.1.3
1467888846	Pent-2-enoyl-CoA	4.2.1.17
1467985406	Paxilline	2.7.10.2
1467919532	Parathion	2.7.4.6
1467875442	Pantothenate	2.7.1.33
1467878010	Pantetheine 4'-phosphate	2.7.1.33
1467878010	Pantetheine 4'-phosphate	2.7.1.33,2.7.1.34
1467878010	Pantetheine 4'-phosphate	2.7.1.34
1467878010	Pantetheine 4'-phosphate	2.7.7.3
1467878010	Pantetheine 4'-phosphate	4.1.1.36
1467878010	Pantetheine 4'-phosphate	6.3.2.5
1467875083	Pantetheine	2.7.1.33,2.7.1.34
1467875083	Pantetheine	2.7.1.34
1467873794	Panose	3.2.1.54,3.2.1.1,3.2.1.133,3.1.11.7
1467867611	Palmitoyl-CoA	1.14.19.1
1467867611	Palmitoyl-CoA	1.14.19.3
1467867611	Palmitoyl-CoA	1.3.1.38,1.3.1.8
1467867611	Palmitoyl-CoA	1.3.1.8,1.3.1.38
1467867611	Palmitoyl-CoA	1.3.3.6
1467867611	Palmitoyl-CoA	1.3.3.6,1.3.8.7,1.3.8.8,1.3.8.9,,1.3.99,1.3.99.-
1467867611	Palmitoyl-CoA	1.3.3.6,3.6.1.10
1467867611	Palmitoyl-CoA	1.3.8.8
1467867611	Palmitoyl-CoA	1.3.99.3
1467867611	Palmitoyl-CoA	2.3.1,2.3.1.86
1467867611	Palmitoyl-CoA	2.3.1.16,1.1.1.211
1467867611	Palmitoyl-CoA	2.3.1.199
1467867611	Palmitoyl-CoA	2.3.1.21
1467867611	Palmitoyl-CoA	2.3.1.21,2.3.1.7
1467867611	Palmitoyl-CoA	2.3.1.50
1467867611	Palmitoyl-CoA	2.3.1.51
1467867611	Palmitoyl-CoA	2.3.1.86
1467867611	Palmitoyl-CoA	3.1.2.2, 3.1.2.22,3.1.2.22,3.1.1.1
1467867611	Palmitoyl-CoA	3.1.2.2,3.1.2.22
1467867611	Palmitoyl-CoA	6.2.1.3
1468050008	Palmitoleoyl-CoA	1.14.19.1
1468050008	Palmitoleoyl-CoA	2.3.1.21,2.3.1.7
1468050008	Palmitoleoyl-CoA	2.3.1.51
1468050008	Palmitoleoyl-CoA	3.1.2,3.1.2.2,3.1.2.20
1468050008	Palmitoleoyl-CoA	6.2.1.3
1469406780	PA(34:1)	2.3.1.51
1468220717	PA	2.3.1.51
1468220717	PA	2.7.7.41
1468220717	PA	3.1.3.4
1468278956	PA	2.3.1.51
1468278956	PA	2.7.7.41
1468278956	PA	3.1.3.4
1468325330	PA	2.3.1.51
1468325330	PA	2.7.7.41
1468325330	PA	3.1.3.4
1469407349	PA	2.3.1.51
1467879210	P1,P4-Bis(5'-adenosyl)tetraphosphate	1.1.1.41,1.1.1.286
1467879210	P1,P4-Bis(5'-adenosyl)tetraphosphate	1.1.1.95,1.1.1.399,1.1.1.272,3.6.1.10
1467879210	P1,P4-Bis(5'-adenosyl)tetraphosphate	1.2.1.3,1.2.1.5,1.17.1.4,1.2.1.4
1467879210	P1,P4-Bis(5'-adenosyl)tetraphosphate	1.2.4.1, 1.8.1.4, 2.3.1.12,2.3.1.12,1.8.1.4,1.2.1.51
1467915849	P1,P3-Bis(5'-adenosyl) triphosphate	1.1.1.244,1.1.1.1
1467868515	p-Coumaroyl-CoA	4.2.1.17
1467871275	p-Benzoquinone	1.10.2.2
1467871275	p-Benzoquinone	1.3.5.1,1.3.5.4
1467871275	p-Benzoquinone	1.3.5.2
1467871275	p-Benzoquinone	1.6.5.6,1.6.5.2,1.6.5.10,1.8.1.9
1467866007	Oxaloacetate	2.3.3.8,4.1.3.6
1467866007	Oxaloacetate	2.6.1.1
1467866007	Oxaloacetate	2.6.1.1,2.6.1.19
1467866007	Oxaloacetate	2.6.1.57,2.6.1.78,2.6.1.1
1467866007	Oxaloacetate	2.6.1.70,2.6.1.57
1467868344	Oxalate	2.A.29.7.2
1467990740	ortho-Toluidine	1.11.1.7
1467877711	Orotidine 5'-phosphate	2.4.2.10
1467877711	Orotidine 5'-phosphate	4.1.1.23
1467869325	Orotate	1.3.1.14
1467869325	Orotate	1.3.5.2
1467869325	Orotate	1.3.5.2,1.3.1.14
1467869325	Orotate	1.3.5.2,1.3.98.1
1467869325	Orotate	1.3.5.2,3.6.1.10
1467869325	Orotate	2.4.2.10
1467873941	Orcinol	2.1.1.6
1468049560	Ophthalmate	6.3.2.3
1468009378	OPC8-CoA	1.3.3.6
1468009414	OPC6-CoA	1.3.3.6
1468009414	OPC6-CoA	2.3.1.16
1468009450	OPC4-CoA	1.3.3.6
1468009450	OPC4-CoA	2.3.1.16
1469371922	OMEGA-C55-DOLICHOL-P-GROUP	2.4.1.83
1467871766	Oleoyl-CoA	1.14.19.1
1467871766	Oleoyl-CoA	1.3.3.6
1467871766	Oleoyl-CoA	1.3.8.7,1.3.8.8,1.3.8.9,1.3.99.-,
1467871766	Oleoyl-CoA	2.3.1.16,1.1.1.211
1467871766	Oleoyl-CoA	2.3.1.199
1467871766	Oleoyl-CoA	2.3.1.21,2.3.1.7
1467871766	Oleoyl-CoA	2.3.1.23
1467871766	Oleoyl-CoA	2.3.1.51,2.3.1.23,2.3.1.25
1467871766	Oleoyl-CoA	3.1.2.2
1467871766	Oleoyl-CoA	3.1.2.2,3.1.1.1
1467871766	Oleoyl-CoA	4.2.1.17,1.1.1.35,1.1.1.211,1.3.8.7,1.3.8.8,1.3.8.9,2.3.1.16
1467871766	Oleoyl-CoA	6.2.1.12,6.2.1.3
1467884933	Octanoyl-CoA	1.3.1.10,1.3.1.38,1.3.1.8
1467884933	Octanoyl-CoA	1.3.1.8,1.3.1.38
1467884933	Octanoyl-CoA	1.3.3.6
1467884933	Octanoyl-CoA	1.3.3.6,1.3.8.7,1.3.8.8,1.3.99.-,1.3.99
1467884933	Octanoyl-CoA	1.3.3.6,3.6.1.10
1467884933	Octanoyl-CoA	1.3.8.7,1.3.8.8
1467884933	Octanoyl-CoA	1.3.99.3
1467884933	Octanoyl-CoA	2.3.1.137,2.3.1.7,2.3.1.21
1467884933	Octanoyl-CoA	2.3.1.16,2.3.1.155,1.1.1.211,2.3.1.9
1467884933	Octanoyl-CoA	2.3.1.86
1467917646	Octanoic acid	1.2.1.3
1467917646	Octanoic acid	2.3.1.85
1467917646	Octanoic acid	3.1.2.14,3.1.2.21
1467917646	Octanoic acid	3.1.2.21
1467917646	Octanoic acid	6.2.1.1,6.2.1.11,6.2.1.3
1467917646	Octanoic acid	6.2.1.3
1467881276	Octadecanoic acid	1.14.19.1
1467881276	Octadecanoic acid	2.3.1.41
1467881276	Octadecanoic acid	2.3.1.41,2.3.1.85
1467881276	Octadecanoic acid	2.3.1.85
1467881276	Octadecanoic acid	3.1.2.14
1467881276	Octadecanoic acid	3.1.2.14,3.1.1.5
1467881276	Octadecanoic acid	3.1.2.2
1467881276	Octadecanoic acid	3.A.1.211.1
1467881276	Octadecanoic acid	6.2.1.3
1467873714	O2.-	1.15.1.1
1467893048	O-Propanoylcarnitine	2.3.1.7,2.3.1.21,2.3.1.137
1467876785	O-Phospho-L-serine	3.1.3.3
1467876785	O-Phospho-L-serine	3.1.3.3,3.1.3.1
1468372249	O-pentadecanoylcarnitine	2.3.1.21,2.3.1.7
1468008442	o-Nitrobenzoate	1.2.1.3
1469319747	O-methylserine	6.3.2.2
1467881048	o-Methoxyphenol	1.11.1.7,1.11.1.14
1467881048	o-Methoxyphenol	2.1.1.6
1467891893	O-Butanoylcarnitine	2.3.1.137,2.3.1.7,2.3.1.21
1467889778	O-Acetylcarnitine	2.3.1.7,2.3.1.137,2.3.1.21
1468095622	O-(N-acetyl-alpha-D-galactosaminyl)-L-serine	2.4.1.41,2.4.1.102,2.4.1.148
1468011421	NPC	3.1.1.1
1468454715	Not Available	3.2.1.24
1467906816	Norethindrone	2.7.11.24
1467884907	Nonanoyl-CoA	2.3.1.16,1.1.1.211
1468294094	nonadecanoyl-CoA	1.3.8.7,1.3.8.8,1.3.8.9,1.3.99.-,
1468294094	nonadecanoyl-CoA	2.3.1.16,1.1.1.211
1468294094	nonadecanoyl-CoA	2.3.1.199
1468294094	nonadecanoyl-CoA	2.3.1.21,2.3.1.7
1468294094	nonadecanoyl-CoA	3.1.2.2
1468294094	nonadecanoyl-CoA	6.2.1.3
1467926747	Nitroglycerin	3.4.25.1,1.2.1.3
1467866704	Nitrite	1.11.1.7
1467866704	Nitrite	3.4.25.1,1.2.1.3
1467881193	Nigerose	3.2.1,3.2.1.10,3.2.1.20,3.2.1.3,3.2.1.84,3.1.27.2,3.2.1.21,3.2.1.39,3.2.1.24
1467874107	Nicotine	2.1.1.49
1467878511	Nicotinate D-ribonucleotide	2.7.7.1, 2.7.7.18,2.7.7.18
1467878511	Nicotinate D-ribonucleotide	2.7.7.1,2.7.7.18
1467878511	Nicotinate D-ribonucleotide	2.7.7.18
1467868908	Nicotinate	1.2.1.3
1467902854	Nicotinamide hypoxanthine dinucleotide	1.1.1.205
1467902854	Nicotinamide hypoxanthine dinucleotide	1.2.1.12
1469426285	nicotinamide hypoxanthine dinucleotide	1.1.1.205
1469426285	nicotinamide hypoxanthine dinucleotide	1.2.1.12
1467871113	Nicotinamide D-ribonucleotide	1.1.1.1
1467871113	Nicotinamide D-ribonucleotide	1.1.1.1, 1.1.1.105,1.1.1.105,1.1.1.315,1.1.1.-,3.6.1.10,1.1.1
1467871113	Nicotinamide D-ribonucleotide	1.1.1.1, 1.1.1.71,1.1.1.184,1.1.1.71
1467871113	Nicotinamide D-ribonucleotide	1.1.1.1, 1.1.1.73,1.1.1.284,1.1.1.73
1467871113	Nicotinamide D-ribonucleotide	1.1.1.1,1.1.1,1.1.99.1
1467871113	Nicotinamide D-ribonucleotide	1.1.1.148,1.1.1.210,1.1.1.62,1.1.1.64,1.1.1.51
1467871113	Nicotinamide D-ribonucleotide	1.1.1.163,1.1.1.1
1467871113	Nicotinamide D-ribonucleotide	1.1.1.202,1.1.1.1,3.6.1.10
1467871113	Nicotinamide D-ribonucleotide	1.1.1.205
1467871113	Nicotinamide D-ribonucleotide	1.1.1.78,1.1.1.79,1.1.1.6,1.1.1.21,1.1.1.81,3.6.1.10
1467871113	Nicotinamide D-ribonucleotide	1.1.1.90,1.1.1.1,3.6.1.10
1467871113	Nicotinamide D-ribonucleotide	1.1.1.90,1.1.1.71,1.1.1.1
1467871113	Nicotinamide D-ribonucleotide	1.2.1.19,1.2.1.22,1.2.1.24,1.2.1.26,1.2.1.28,1.2.1.3,1.2.1.31,1.2.1.32,1.2.1.36,1.2.1.48,1.2.1.5,1.2.1.69,1.2.1.8,1.2.1.88,1.2.1,3.6.1.10
1467871113	Nicotinamide D-ribonucleotide	1.2.1.3
1467871113	Nicotinamide D-ribonucleotide	1.2.1.3, 1.2.1.19,1.2.1.-,1.2.1,1.2.1.19,3.6.1.10
1467871113	Nicotinamide D-ribonucleotide	1.2.1.3,1.17.1.4,1.2.1.4,1.2.1.5
1467871113	Nicotinamide D-ribonucleotide	1.2.1.3,1.2.1.89,1.2.1.19
1467871113	Nicotinamide D-ribonucleotide	1.2.1.48,1.2.1.3,3.6.1.10
1467871113	Nicotinamide D-ribonucleotide	1.8.1.4,2.1.2.10,1.8.1
1467871113	Nicotinamide D-ribonucleotide	2.4.2.12
1467871113	Nicotinamide D-ribonucleotide	2.7.7.1
1467871113	Nicotinamide D-ribonucleotide	2.7.7.1,2.7.7.18
1467871113	Nicotinamide D-ribonucleotide	2.7.7.18
1467867595	Nicotinamide	2.4.2.12
1467880148	NH2Mec	3.6.3.M10,3.2.1.82,3.4.24.81,3.4.14.9,3.4.21.89
1468409408	NaMN	2.7.7.18
1469313114	N7-Pan	2.7.1.33
1467898521	N6,N6,N6-Trimethyl-L-lysine	3.4.21.89,3.4.-.-
1467898532	N6-(1,2-Dicarboxyethyl)-AMP	4.3.2.2
1467898532	N6-(1,2-Dicarboxyethyl)-AMP	6.3.4.4
1468086588	N4-N-ACETYL-BETA-D-GLUCOSAMINYL-12	2.4.1.144,2.4.1.145
1467913450	N4-Acetylaminobutanal	1.2.1.3
1467878165	N(pi)-Methyl-L-histidine	6.3.2.11
1467903681	N,N'-Diacetylchitobiosyldiphosphodolichol	2.4.1.-,2.4.1.142,2.4.1
1467903681	N,N'-Diacetylchitobiosyldiphosphodolichol	2.4.1.141
1468012397	N,N-Diethylglycine	3.1.1.1
1467918010	N-Trimethyl-2-aminoethylphosphonate	2.7.7.15
1467888802	N-Methyltyramine	2.1.1.27,2.1.1.49,2.1.1.6
1467915985	N-Methyltryptamine	2.1.1.49
1467915974	N-Methylserotonin	2.1.1.49
1468203745	N-methylpyrazole	2.1.1.49
1469362566	N-Methylnicotinium	2.1.1.49
1467877184	N-Methyl-L-glutamate	6.3.2.2
1469320429	N-methyl-&beta;-alanine	2.1.1.49
1467897273	N-Hydroxy-4-aminobiphenyl	2.8.2.1
1467973280	N-Ethylglycine	3.1.1.1
1467870954	N-Carbamoyl-L-aspartate	2.1.3.2
1467870954	N-Carbamoyl-L-aspartate	3.5.2.3
1467870954	N-Carbamoyl-L-aspartate	3.5.2.3,2.4.1.58,2.4.1.73,2.4.1.-
1469380739	N-Acetylserotonin sulfate	2.8.2.1
1467876547	N-Acetylserotonin	2.8.2.1
1467869128	N-Acetylneuraminate	3.2.1.18
1467869128	N-Acetylneuraminate	3.2.1.18,3.1.21.5,3.4.16.5,3.2.1.23,3.1.6.4,3.2.1.129,3.1.3.29
1467869128	N-Acetylneuraminate	3.2.1.22,3.2.1.77,3.2.1.18,3.2.1.137
1467872809	N-Acetyllactosamine	3.2.1.24
1467928044	N-Acetylisoniazid	3.5.1.-,3.1.1.1,3.5.1
1468253608	N-acetylcarnosine	2.3.1.88
1467900875	N-Acetyl-L-glutamate 5-phosphate	1.2.1.41
1467903389	N-Acetyl-D-glucosaminyldiphosphodolichol	2.4.1.141
1467903389	N-Acetyl-D-glucosaminyldiphosphodolichol	2.7.8.15
1467870068	N-Acetyl-D-glucosamine 6-phosphate	2.7.1.59,2.7.1.60,2.7.1.1
1467870068	N-Acetyl-D-glucosamine 6-phosphate	5.4.2.3
1467901708	N-Acetyl-D-glucosamine 1-phosphate	5.4.2.3
1467867422	N-Acetyl-D-glucosamine	2.7.1.59,2.7.1.60,2.7.1.1
1467867422	N-Acetyl-D-glucosamine	3.2.1.24,3.2.1.62
1468065018	N-acetyl-beta-D-glucosaminyl-(1->3)-beta-D-galactosyl-(1->4)-beta-D-glucosylceramide	2.4.1.149
29755139	N-[(2R,3R,4S,5R)-6-[[(2S,3S,4S,5S,6R)-4,5-dihydroxy-6-(hydroxymethyl)-3-[[(2R,3S,4S,5S,6R)-3,4,5-trihydroxy-6-(hydroxymethyl)-2-oxanyl]oxy]-2-oxanyl]oxy]-3,4-bis[[(2R,3S,4S,5R,6R)-5-hydroxy-6-(hydroxymethyl)-3,4-bis[[(2R,3S,4S,5S,6R)-3,4,5-trihydroxy-6-(h	3.2.1.24
29749731	N-[(2R,3R,4R,5S,6R)-2-[(2R,3R,4S,5R)-2-acetamido-6-hydroxy-1-oxo-4-[[(2S,3S,4S,5S,6R)-3,4,5-trihydroxy-6-(hydroxymethyl)-2-oxanyl]oxy]-5-[[(2R,3S,4S,5S,6R)-3,4,5-trihydroxy-6-(hydroxymethyl)-2-oxanyl]oxy]hexan-3-yl]oxy-4,5-dihydroxy-6-(hydroxymethyl)-3-ox	3.2.1.24
29755150	N-[(2R,3R,4R,5S,6R)-2-[(2R,3R,4S,5R)-2-acetamido-5-[[(2R,3S,4S,5R,6R)-5-hydroxy-6-(hydroxymethyl)-3,4-bis[[(2R,3S,4S,5S,6R)-3,4,5-trihydroxy-6-(hydroxymethyl)-2-oxanyl]oxy]-2-oxanyl]oxy]-1-oxo-4-[[(2S,3S,4S,5S,6R)-3,4,5-trihydroxy-6-(hydroxymethyl)-2-oxan	3.2.1.24
1467900482	N-((R)-Pantothenoyl)-L-cysteine	2.7.1.33
1467867385	myo-Inositol	2.7.8.11
1467930351	Mycophenolate mofetil	3.1.1.1
1468044994	Mycophenolate	3.1.1.1
1468161804	mqn8|M_mqn8|menaquinone-8|mqn8|M_mqn8	1.6.5.3
1468011599	Monoethylglycinexylidide	3.1.1.1
1468052718	minoxidil	2.8.2.1
1468032452	Methylselenic acid	1.8.1.9
1467886786	Methylmalonate	1.2.1.3
1467886786	Methylmalonate	1.2.1.3,1.2.3.1
1467872180	Methylglyoxal	1.1.1.283,1.2.1.49,1.1.1.156,1.1.1.79,1.1.1.81
1467872180	Methylglyoxal	1.1.1.78,1.1.1.79,1.1.1.6,1.1.1.21,1.1.1.81,3.6.1.10
1467924487	Methyldopa anhydrous	1.11.1.7
1467979176	Methyl salicylate	3.1.1.1
1467971089	Methyl jasmonate	3.1.1.1
1468238221	methyl indole-3-carboxylate	3.1.1.1
1467891784	Methyl ethyl ketone	1.1.1.1,1.1.1.184
1467891784	Methyl ethyl ketone	1.1.1.1,3.6.1.10
1467891784	Methyl ethyl ketone	2.7.11.24,1.8.99
1468046790	Methyl (indol-3-yl)acetate	3.1.1.1
1467867313	Methanol	1.1.1.244,1.1.1.1
1467867313	Methanol	1.11.1.6,1.11.1.7,1.11.1.21,1.11.1.8,1.11.2.2,3.6.1.10
1467867313	Methanol	3.1.1.1
1467911611	Methaneselenol	1.8.1.9
1569575789	metacyc:NN-DIACETYLCHITOBIOSYLDIPHOSPHODOLICHO	2.4.1.141
1569575789	metacyc:NN-DIACETYLCHITOBIOSYLDIPHOSPHODOLICHO	2.4.1.142
1467972756	MET-enkephalin	3.4.11.2
1467883030	Mesaconate	6.2.1.5
1467876342	Mercaptopyruvate	2.6.1.1, 2.6.1.3,2.6.1.3
1467876342	Mercaptopyruvate	2.6.1.3
1467875044	Menaquinone	1.10.2.2
1467875044	Menaquinone	1.3.5.1,1.3.5.4
1467875044	Menaquinone	1.3.5.2
1467875044	Menaquinone	1.6.5.11,1.6.5.2,1.6.5.3
1467870443	Mannitol	1.1.1.11,1.1.1.67,1.1.1.14,1.1.1.15,1.1.1.12
1467870443	Mannitol	1.1.1.15,1.1.1.12,1.1.1.14
1467870443	Mannitol	1.1.1.15,1.1.1.21
1467870443	Mannitol	1.1.1.406,1.1.1.15,1.1.1.16,1.1.1.407,1.1.1.12
1467870443	Mannitol	2.7.1.1
1468080436	maltotetraose	2.4.1.1
1468080436	maltotetraose	3.2.1.1
1468080436	maltotetraose	3.2.1.1,3.1.11.7
1468080436	maltotetraose	3.2.1.20,3.2.1.1
1468220201	maltopentaose	2.4.1.1
1468220201	maltopentaose	3.2.1.1
1468220201	maltopentaose	3.2.1.1,3.1.11.7
1468220201	maltopentaose	3.2.1.20,3.2.1.1
1467884861	Maltohexaose	2.4.1.1
1467884861	Maltohexaose	3.2.1.1
1467884861	Maltohexaose	3.2.1.1,2.1.1.313
1467884861	Maltohexaose	3.2.1.20,3.2.1.1
1467884861	Maltohexaose	3.2.1.3,3.2.1.10
1468220209	maltoheptaose	2.4.1.1
1468220209	maltoheptaose	3.2.1.1
1468220209	maltoheptaose	3.2.1.20,3.2.1.1
1468220209	maltoheptaose	3.2.1.54,3.2.1.aq,3.2.1.1,3.2.1.133,3.2.1.2
1467866633	Malonyl-CoA	2.3.1,2.3.1.39
1467866633	Malonyl-CoA	2.3.1.199
1467866633	Malonyl-CoA	2.3.1.199,2.3.1.260
1467866633	Malonyl-CoA	2.3.1.21,2.3.1.7
1467866633	Malonyl-CoA	2.3.1.261,1.11.1.B6,3.7.1.B1,2.3.1.85
1467866633	Malonyl-CoA	2.3.1.38,2.3.1.41,2.3.1.85
1467866633	Malonyl-CoA	2.3.1.41
1467866633	Malonyl-CoA	2.3.1.41,2.3.1,2.3.1.260,2.3.1.85,2.3.1.86,2.3.1.-,2.3.1.235,2.3.1.199
1467866633	Malonyl-CoA	2.3.1.41,2.3.1.85,2.3.1.86
1467866633	Malonyl-CoA	2.3.1.85
1467866633	Malonyl-CoA	2.3.1.85,2.3.1.39
1467866633	Malonyl-CoA	2.3.1.86
1467870335	Malonate	1.2.1.3,1.2.1.36
1467869449	Magnesium cation	2.7.7.3
1468283798	Lys-Phe	3.4.11.2
1467981421	Luteolin 7-O-[beta-D-glucuronosyl-(1->2)-beta-D-glucuronide]	1.11.1.7
1468008479	Lipoyl-AMP	2.7.7.63
1468008479	Lipoyl-AMP	2.7.7.63,6.3.1.20
1468008479	Lipoyl-AMP	6.3.1.20,2.7.7.63
1467873917	Lipoate	1.8.1,1.8.1.4
1467873917	Lipoate	2.7.7.63,6.3.1.20
1467868835	Lipoamide	1.2.4.1
1467868835	Lipoamide	1.2.4.1,1.2.4.4
1467868835	Lipoamide	1.2.4.2
1467868835	Lipoamide	1.2.4.4
1467868835	Lipoamide	1.4.4.2
1467868835	Lipoamide	1.4.4.2,1.2.4.4
1467868835	Lipoamide	1.6.2.6,1.8.1,1.8.1.4
1467868835	Lipoamide	1.8.1.4,2.1.2.10,1.8.1
1467885799	Linoleoyl-CoA	1.14.19.3
1467885799	Linoleoyl-CoA	1.3.3.6
1467885799	Linoleoyl-CoA	1.3.8.7,1.3.8.8,1.3.8.9,1.3.99.-,
1467885799	Linoleoyl-CoA	2.3.1.199
1467885799	Linoleoyl-CoA	2.3.1.21,2.3.1.7
1467885799	Linoleoyl-CoA	2.3.1.23,2.3.1.25
1467885799	Linoleoyl-CoA	3.1.2,3.1.2.2
1467885799	Linoleoyl-CoA	3.1.2.2
1467885799	Linoleoyl-CoA	3.1.2.2,3.1.2
1467885799	Linoleoyl-CoA	6.2.1.3
1467881851	Linoleate	1.14.19.3
1467881851	Linoleate	3.1.2,3.1.2.2
1467881851	Linoleate	3.1.2.2
1467881851	Linoleate	3.1.2.2,3.1.2
1467881851	Linoleate	3.A.1.211.1
1467881851	Linoleate	6.2.1.3
1467923504	Lidocaine	3.1.1.1
1467913613	Leukotriene D4	2.3.2.2
1467886747	Leukotriene C4	2.3.2.2
1467969307	Leucyl-leucine	3.4.11.4
1468283691	Leu-Phe	3.4.11.2
1468290395	Leu-Leu-Leu	3.4.11.4
1469414590	lesqueroloyl-CoA	2.3.1.23
1467883918	Lauroyl-CoA	1.3.1.10,1.3.1.39
1467883918	Lauroyl-CoA	1.3.1.8,1.3.1.38
1467883918	Lauroyl-CoA	1.3.3.6
1467883918	Lauroyl-CoA	1.3.3.6,1.3.8.7,1.3.8.8,1.3.99.-,1.3.99,1.3.8.9,
1467883918	Lauroyl-CoA	1.3.3.6,3.6.1.10
1467883918	Lauroyl-CoA	1.3.8.8
1467883918	Lauroyl-CoA	2.3.1.137,2.3.1.21
1467883918	Lauroyl-CoA	2.3.1.16,1.1.1.211,2.3.1.9
1467883918	Lauroyl-CoA	2.3.1.51
1467883918	Lauroyl-CoA	2.3.1.86
1467883918	Lauroyl-CoA	3.1.2.2
1467883918	Lauroyl-CoA	6.2.1.3
1467882950	Lanosterol	5.4.99.7
1467867986	L-Valine	2.A.3.8.1
1467867986	L-Valine	2.A.3.8.1,2.6.1.66
1467867986	L-Valine	6.1.1.9
1467867986	L-Valine	6.1.1.9,6.1.1.10
1467867986	L-Valine	6.3.2.2
1467866617	L-Tyrosine	1.11.1.7
1467866617	L-Tyrosine	1.11.1.8,1.11.1.7
1467866617	L-Tyrosine	2.6.1.1, 2.6.1.5, 2.6.1.9, 2.6.1.57,2.6.1.5,2.6.1.57,2.6.1.9,2.6.1.42,3.6.1.10
1467866617	L-Tyrosine	2.8.2.1
1467866617	L-Tyrosine	2.A.3.8.1
1467866617	L-Tyrosine	6.1.1.1
1467866617	L-Tyrosine	6.1.1.1,3.6.1.10
1467866617	L-Tyrosine	6.3.2.25
1467866565	L-Tryptophan	2.6.1.27,2.6.1.1
1467866565	L-Tryptophan	2.6.1.57
1467866565	L-Tryptophan	2.A.3.8.1
1467866565	L-Tryptophan	6.1.1.2
1467866565	L-Tryptophan	6.2.1,6.1.1.2
1467868061	L-Threonine	2.A.18.6.7
1467868061	L-Threonine	2.A.3.8.1
1467868061	L-Threonine	2.A.3.8.1,4.1.2.5
1467868061	L-Threonine	3.4.21.89
1467868061	L-Threonine	4.1.2.48,4.1.2.5,4.1.2.49,4.1.2.42,2.1.2.1,3.6.1.10
1467868061	L-Threonine	6.1.1.3
1467868061	L-Threonine	6.3.2.2
1467868822	L-Sorbose	1.1.1.15,1.1.1.12,1.1.1.14
1467868822	L-Sorbose	2.7.1.1
1467868822	L-Sorbose	3.2.1.1
1467868822	L-Sorbose	3.2.1.10,3.2.1.20,3.2.1.48
1467866388	L-Serine	2.1.2.1
1467866388	L-Serine	2.3.1.50
1467866388	L-Serine	2.A.18.6.5
1467866388	L-Serine	2.A.3.8.1
1467866388	L-Serine	2.A.3.8.1,2.8.1.4
1467866388	L-Serine	3.1.3.3
1467866388	L-Serine	3.1.3.3,3.1.3.1
1467866388	L-Serine	3.4.11.1
1467866388	L-Serine	6.1.1.11
1467866388	L-Serine	6.1.1.11,6.2.1
1467866388	L-Serine	6.3.2.2
1467908671	L-Selenomethionine	1.18.6.1,2.1.1.12,6.1.1.10,1.3.5.5,1.3.99.28,1.3.99.29,1.3.99.30,
1467908671	L-Selenomethionine	2.1.1.13,2.1.1.14
1467908671	L-Selenomethionine	2.5.1.6
1467908671	L-Selenomethionine	6.1.1.10
1467871718	L-Rhamnose	3.2.1.51,3.2.1.24
1467867529	L-Proline	2.A.18.6.5
1467867529	L-Proline	2.A.3.8.1
1467867529	L-Proline	6.1.1.15
1467867529	L-Proline	6.1.1.15,6.2.1
1467867529	L-Proline	6.3.2,6.1.1.15
1467866580	L-Phenylalanine	1.11.1.7
1467866580	L-Phenylalanine	1.13.12.9,1.11.1.21,1.11.1.7
1467866580	L-Phenylalanine	2.6.1.1, 2.6.1.5, 2.6.1.9, 2.6.1.57,2.6.1.5,2.6.1.57,2.6.1.9,2.6.1.21,2.6.1.24
1467866580	L-Phenylalanine	2.6.1.58,2.6.1.57
1467866580	L-Phenylalanine	2.6.1.70,2.6.1.57
1467866580	L-Phenylalanine	2.A.3.8.1
1467866580	L-Phenylalanine	3.4.11.2
1467866580	L-Phenylalanine	3.4.11.2,3.4.13
1467866580	L-Phenylalanine	3.6.1.10,3.4.11.2,3.4.13
1467866580	L-Phenylalanine	6.1.1.20
1467866580	L-Phenylalanine	6.3.2,6.1.1.20
1467892829	L-Palmitoylcarnitine	2.3.1.21
1467892829	L-Palmitoylcarnitine	2.3.1.21,2.3.1.7
1467891757	L-Octanoylcarnitine	2.3.1.137,2.3.1.7,2.3.1.21
1467910649	L-Normetanephrine	2.1.1.6
1467884818	L-Norleucine	6.3.2.2
1467872196	L-Noradrenaline	2.1.1.6
1467910639	L-Metanephrine	2.1.1.6
1467902381	L-Malyl-CoA	6.2.1.9,6.2.1.5
1467866162	L-Lysine	2.3.2.s,3.2.1.43,3.5.1.17,3.4.11.2
1467866162	L-Lysine	2.5.1.46
1467866162	L-Lysine	3.4.11.2
1467866162	L-Lysine	4.1.1.18,4.1.1.50
1467866162	L-Lysine	6.1.1.6
1467866162	L-Lysine	6.1.1.6,3.6.1.10
1467866162	L-Lysine	6.3.2.11
1467867191	L-Leucine	1.13.11.B6,3.4.11.2
1467867191	L-Leucine	2.6.1.6, 2.6.1.42,2.6.1.67,2.6.1.42,2.6.1.1,3.6.1.10
1467867191	L-Leucine	2.A.3.8.1
1467867191	L-Leucine	3.4.11.1
1467867191	L-Leucine	3.4.11.2
1467867191	L-Leucine	3.4.11.4
1467867191	L-Leucine	3.4.17.1,3.4.17.5,3.4.11.2
1467867191	L-Leucine	6.1.1.4
1467867191	L-Leucine	6.3.2,2.3.1,6.1.1.4
1467867191	L-Leucine	6.3.2.2
1467870608	L-Isoleucine	2.A.3.8.1
1467870608	L-Isoleucine	6.1.1.5
1467870608	L-Isoleucine	6.2.1.46,6.1.1.5
1467870608	L-Isoleucine	6.3.2,6.1.1.5
1467870608	L-Isoleucine	6.3.2.2
1467869044	L-Homoserine	2.A.18.6.5
1467869044	L-Homoserine	2.A.3.8.1
1467867359	L-Histidine	2.A.18.6.5
1467867359	L-Histidine	6.1.1.21
1467867359	L-Histidine	6.3.2.11
1467895085	L-Glutamyl 5-phosphate	1.2.1.41
1467895085	L-Glutamyl 5-phosphate	2.7.2.11
1467878310	L-Glutamate 5-semialdehyde	1.2.1.41
1467871513	L-Cystine	1.8.1.9,1.8.1.10
1467871513	L-Cystine	2.A.3.8.5
1467866836	L-Cysteine	1.8.1.10,1.8.1.9,1.8.4.2
1467866836	L-Cysteine	1.8.1.9,1.8.1.10
1467866836	L-Cysteine	2.6.1.1, 2.6.1.3,2.6.1.3
1467866836	L-Cysteine	2.6.1.3
1467866836	L-Cysteine	2.8.1.7,2.A.3.8.1
1467866836	L-Cysteine	2.A.18.6.5
1467866836	L-Cysteine	2.A.3.8.1
1467866836	L-Cysteine	2.A.3.8.1,2.8.1.4
1467866836	L-Cysteine	3.4.11.1
1467866836	L-Cysteine	3.4.11.1,3.4.11.2,3.4.11.23,3.4.13.-,3.4.13
1467866836	L-Cysteine	3.4.11.2
1467866836	L-Cysteine	6.1.1.16
1467866836	L-Cysteine	6.3.2,6.1.1.15,6.1.1.16
1467866836	L-Cysteine	6.3.2,6.1.1.16,6.1.1.15
1467866836	L-Cysteine	6.3.2,6.3.2.5
1467866836	L-Cysteine	6.3.2.2
1467866836	L-Cysteine	6.3.2.5
1467871703	L-Cysteate	2.6.1.1
1467871703	L-Cysteate	2.6.1.1,2.6.1.3
1467871455	L-Carnitine	2.3.1.137,2.3.1.21
1467871455	L-Carnitine	2.3.1.137,2.3.1.21,2.3.1.7
1467871455	L-Carnitine	2.3.1.137,2.3.1.7,2.3.1.21
1467871455	L-Carnitine	2.3.1.21
1467871455	L-Carnitine	2.3.1.21,2.3.1.7
1467871455	L-Carnitine	2.3.1.7,2.3.1.137,2.3.1.21
1467871455	L-Carnitine	2.3.1.7,2.3.1.21,2.3.1.137
1467866192	L-Aspartate	2.1.3.2
1467866192	L-Aspartate	2.6.1.1
1467866192	L-Aspartate	2.6.1.1,2.6.1.19
1467866192	L-Aspartate	2.6.1.57,2.6.1.78,2.6.1.1
1467866192	L-Aspartate	2.6.1.70,2.6.1.57
1467866192	L-Aspartate	3.4.11.1
1467866192	L-Aspartate	4.3.1.1
1467866192	L-Aspartate	6.1.1.12,6.1.1.23
1467866192	L-Aspartate	6.3.2.6
1467866192	L-Aspartate	6.3.4.4
1467867581	L-Asparagine	2.A.18.6.7
1467867581	L-Asparagine	2.A.3.8.1
1467867581	L-Asparagine	3.4.11.1
1467867581	L-Asparagine	6.1.1.22
1467875020	L-Arogenate	2.6.1.57,2.6.1.78,2.6.1.1
1467875020	L-Arogenate	2.6.1.79,2.6.1.1
1467866345	L-Arginine	3.4.11.2,3.2.1.111
1467866345	L-Arginine	6.1.1.19
1467866345	L-Arginine	6.3.2.11
1467866345	L-Arginine	6.3.2.11,6.3.2.49
1467970739	L-Arabinose	2.7.1.1
1467866080	L-Alanine	2.3.1,6.1.1.7,6.1.1.13
1467866080	L-Alanine	2.3.2.2
1467866080	L-Alanine	2.6.1.2,2.6.1.21,2.6.1.1
1467866080	L-Alanine	2.6.1.58,2.6.1.57
1467866080	L-Alanine	2.8.1.7,2.A.3.8.1
1467866080	L-Alanine	2.A.18.6.7
1467866080	L-Alanine	2.A.3.8.1
1467866080	L-Alanine	2.A.3.8.1,2.6.1.66
1467866080	L-Alanine	3.4.11.1
1467866080	L-Alanine	3.4.11.2,3.4.13
1467866080	L-Alanine	3.4.11.2,3.5.1.B15,3.4.13.18,3.4.13.19
1467866080	L-Alanine	6.1.1.13,6.1.1.7
1467866080	L-Alanine	6.1.1.7
1467866080	L-Alanine	6.3.2.2
1467874542	L-Adrenaline	2.1.1.6
1467881078	Kallidin	3.4.11.1
1467866603	ITP	2.7.1.1
1467866603	ITP	2.7.1.1,2.7.1.2
1467866603	ITP	2.7.1.1,2.7.1.4
1467866603	ITP	2.7.1.40
1467866603	ITP	2.7.1.40,2.7.1.1
1467866603	ITP	2.7.2.10,2.7.2.3
1467866603	ITP	2.7.4.6
1467866603	ITP	3.6.1.8, 3.6.1.66,3.6.1.-,3.6.1.66,3.6.1,3.6.1.19
1467866603	ITP	6.2.1.4
1467872008	Itaconyl-CoA	4.2.1.56
1467872008	Itaconyl-CoA	6.2.1.4
1467872008	Itaconyl-CoA	6.2.1.4,6.2.1.5
1467872008	Itaconyl-CoA	6.2.1.5
1467871497	Itaconate	6.2.1.4
1467871497	Itaconate	6.2.1.4,6.2.1.5
1467871497	Itaconate	6.2.1.5
1467923411	Isoproterenol	1.11.1.7
1468044727	Isopentenyl phosphate	4.1.1.33
1467867268	Isopentenyl diphosphate	2.4.1.B51,2.5.1.87
1467867268	Isopentenyl diphosphate	2.5.1,2.5.1.20,3.6.1.10,2.5.1.1,2.5.1.10,2.5.1.90,2.5.1.81,2.5.1.-,2.5.1.29
1467867268	Isopentenyl diphosphate	2.5.1.-,2.5.1.29,2.5.1
1467867268	Isopentenyl diphosphate	2.5.1.1,2.5.1.28,2.5.1.10
1467867268	Isopentenyl diphosphate	2.5.1.10,2.5.1.20,2.5.1.68,2.5.1.1,2.5.1.31
1467867268	Isopentenyl diphosphate	2.5.1.142,2.5.1.29
1467867268	Isopentenyl diphosphate	2.5.1.29
1467867268	Isopentenyl diphosphate	2.5.1.29,2.5.1.10,2.5.1.1
1467867268	Isopentenyl diphosphate	2.5.1.86,2.5.1.87,2.5.1.88,2.5.1.-
1467867268	Isopentenyl diphosphate	2.5.1.86,2.5.1.91
1467867268	Isopentenyl diphosphate	2.5.1.90,2.5.1.87
1467867268	Isopentenyl diphosphate	2.5.1.91
1467867268	Isopentenyl diphosphate	2.5.1.92,2.5.1.10
1467867268	Isopentenyl diphosphate	4.1.1.33
1467926655	Isonicotinic acid	3.5.1.-,3.1.1.1
1467926655	Isonicotinic acid	3.5.1.-,3.1.1.1,3.5.1
1467923390	Isoniazid	3.5.1.-,3.1.1.1
1467868895	Isomaltose	3.2.1.10
1467868895	Isomaltose	3.2.1.10,3.2.1.22,3.2.1.163,3.2.1.205,3.2.1.21,3.2.1.20,3.6.1.10
1467869532	Isocitrate	1.1.1.41,1.1.1.286
1467869532	Isocitrate	2.A.29.7.2
1467869532	Isocitrate	4.2.1.3
1467869532	Isocitrate	4.2.1.3,2.A.29.7.2
1467994116	Isobutyl alcohol	1.1.1.1
1468012358	Irinotecan	3.1.1.1
1467880119	Iodine	1.11.1.8,1.11.1.7
1467910659	Iodide	1.11.1.8,1.11.1.7
1467878427	Inositol 1-phosphate	3.1.4.11,3.1.3.66
1467878427	Inositol 1-phosphate	3.1.4.11,3.6.1.10
1467869312	Inosine	2.3.1.85
1467869312	Inosine	2.A.41.2.4,2.A.41.2.6
1467869763	Indolepyruvate	2.6.1.27,2.6.1.1
1469333632	INDOLE-3-GLYCOL	1.1.1.1
1468040763	Indole-3-carboxylate	3.1.1.1
1467876294	Indole-3-acetate	1.2.1.3
1467876294	Indole-3-acetate	1.2.1.3,1.17.1.4,1.2.1.4,1.2.1.5
1467876294	Indole-3-acetate	2.1.1.6
1467876294	Indole-3-acetate	3.1.1.1
1467873072	Indole-3-acetaldehyde	1.2.1.3
1467873072	Indole-3-acetaldehyde	1.2.1.3,1.17.1.4,1.2.1.4,1.2.1.5
1467867285	IMP	1.1.1.205
1467867285	IMP	2.1.2.3, 3.5.4.10,3.5.4.10
1467867285	IMP	2.4.2.8
1467867285	IMP	2.7.4.8
1467867285	IMP	3.1.4.17
1467867285	IMP	3.5.4.10
1467867285	IMP	3.6.1.8, 3.6.1.66,3.6.1.-,3.6.1.66,3.6.1,3.6.1.19
1467867285	IMP	6.3.4.4
1467923348	Imipramine	2.1.1.49
1467978293	Iminoerythrose 4-phosphate	2.2.1.1
1467978293	Iminoerythrose 4-phosphate	3.6.1.10,2.2.1.1
1467891732	Imidazole-4-acetate	1.2.1.3
1467891732	Imidazole-4-acetate	1.2.1.3,1.2.1.4,1.2.1.5
1467907204	Imidazole-4-acetaldehyde	1.2.1.3,1.2.1.4,1.2.1.5
1467866932	IDP	2.7.1.1
1467866932	IDP	2.7.1.1,2.7.1.2
1467866932	IDP	2.7.1.1,2.7.1.4
1467866932	IDP	2.7.1.40
1467866932	IDP	2.7.1.40,2.7.1.1
1467866932	IDP	2.7.2.10,2.7.2.3
1467866932	IDP	2.7.4.6
1467866932	IDP	2.7.4.8
1467866932	IDP	6.2.1.4
1468011292	Icosenoyl-CoA	1.3.3.6
1468011292	Icosenoyl-CoA	1.3.8.7,1.3.8.8,1.3.8.9,1.3.99.-,
1468011292	Icosenoyl-CoA	2.3.1.16,1.1.1.211
1468011292	Icosenoyl-CoA	2.3.1.199
1468011292	Icosenoyl-CoA	2.3.1.21,2.3.1.7
1468011292	Icosenoyl-CoA	2.3.1.23
1468011292	Icosenoyl-CoA	3.1.2.2
1468011292	Icosenoyl-CoA	6.2.1.3
1467917680	Icosanoic acid	3.1.2.2
1467917680	Icosanoic acid	3.1.2.2,3.1.2.20
1467917680	Icosanoic acid	3.A.1.211.1
1467917680	Icosanoic acid	6.2.1.3
1469403467	icosanal	1.3.8.8
1467881770	Ibuprofen	6.2.1.3
1467869030	Hypoxanthine	2.4.2.8
1468588854	Hypothiocyanite	1.11.1.7,1.2.4.4,1.8.1.4
1467932841	Hypoglycin B	2.3.2.2
1467932928	Hypoglycin	2.3.2.2
1468039661	Hypochlorous acid	1.11.1.7
1468039661	Hypochlorous acid	1.11.2.2,1.11.1.7
1467906776	Hydroxytamoxifen	2.8.2.1
1467867813	Hydroxypyruvate	1.1.1.26,1.1.1.29,1.1.1.81,1.1.1.27,1.1.1.79,3.6.1.10
1467867813	Hydroxypyruvate	1.1.1.79,1.1.1.81,1.1.1,3.6.1.10
1468014386	Hydroxypyruvaldehyde phosphate	1.2.1.3
1467876986	Hydroxymethylbilane	2.5.1.61,3.6.1.10
1467868118	Hydroxylamine	6.3.4.2
1467871989	Hydroquinone	1.10.2.2
1467871989	Hydroquinone	1.3.5.1,1.3.5.4
1467871989	Hydroquinone	1.3.5.2
1467871989	Hydroquinone	1.6.5.6,1.6.5.2,1.6.5.10,1.8.1.9
1467869221	Hydrogen sulfide	2.8.1.8
1467869221	Hydrogen sulfide	3.13.1.5,4.2.1.1
1467881253	Hydrogen selenide	1.8.1.9,1.8.1.2
1467881253	Hydrogen selenide	2.7.9.3
1467879774	Hydrogen cyanide	2.5.1.18
1468093962	Hydrogen	1.12.98.1,6.1.1.7,2.3.2.11
1468093962	Hydrogen	1.18.6.1,1.14.99.1
1469444647	Hydrogen	1.1.1.205
1469444647	Hydrogen	1.12.1.2,3.6.1.10,1.5.1.12,1.12.1.5,1.17.1.4,1.1.1.205
1469444647	Hydrogen	1.12.2.1,1.18.6.1,3.1.2.14,3.1.1.13,3.6.1.21,3.1.1.-,3.5.4.16
1469444647	Hydrogen	1.14.19.1
1469444647	Hydrogen	1.17.4.1
1469444647	Hydrogen	1.2.1.29,1.2.1.68,1.2.1.64,1.2.1.5,3.5.1.-,1.2.1.67,1.2.1.3,1.2.1.47
1469444647	Hydrogen	1.2.1.3
1469444647	Hydrogen	1.2.1.72,1.2.1.3,1.2.1.60,1.2.1.7,1.2.1.54,1.2.1.5,1.3,1.2.1.21,1.2.1.88,1.2.1.46,1.5.1.12
1469444647	Hydrogen	1.9.3.1
1469444647	Hydrogen	2.1.2.1
1469444647	Hydrogen	2.1.2.10,3.5.4.9
1469444647	Hydrogen	2.1.2.2
1469444647	Hydrogen	2.3.1.41,2.3.1.85
1469444647	Hydrogen	2.3.1.85
1469444647	Hydrogen	2.3.1.85,2.3.1.41
1469444647	Hydrogen	2.3.1.85,2.3.1.86,2.3.1.41
1469444647	Hydrogen	2.3.1.86
1469444647	Hydrogen	2.4.2.14
1469444647	Hydrogen	2.5.1.6
1469444647	Hydrogen	2.7.9.3
1469444647	Hydrogen	3.1.1.1
1469444647	Hydrogen	3.1.2.14
1469444647	Hydrogen	3.1.2.2
1469444647	Hydrogen	3.1.2.21
1469444647	Hydrogen	3.1.3.27,3.1.3.64,3.1.3.57,3.1.3.67,3.1.3.66,3.1.3.78,3.1.3.86,3.1.3.95,3.1.3.36
1469444647	Hydrogen	3.1.3.3
1469444647	Hydrogen	3.1.3.4
1469444647	Hydrogen	3.2.1.10
1469444647	Hydrogen	3.3.1.1
1469444647	Hydrogen	3.4.11.1
1469444647	Hydrogen	3.5.2.3
1469444647	Hydrogen	3.5.3.11
1469444647	Hydrogen	3.5.4.10
1469444647	Hydrogen	3.5.4.9
1469444647	Hydrogen	3.6.1.1
1469444647	Hydrogen	3.6.1.10,1.14.13,1.14.15.6,1.14.13.17,1.14.21.6
1469444647	Hydrogen	3.6.1.52
1469444647	Hydrogen	3.6.3.14
1469444647	Hydrogen	3.6.3.9
1469444647	Hydrogen	3.6.5.6
1469444647	Hydrogen	4.2.1.11
1469444647	Hydrogen	4.2.1.17
1469444647	Hydrogen	4.2.1.24
1469444647	Hydrogen	5.1.3.7
1469444647	Hydrogen	6.3.4.2
1469444647	Hydrogen	6.3.5.2
1467908887	Hydrazine	3.5.1.-,3.1.1.1
1467908887	Hydrazine	6.3.4.2
1467910580	Homovanillate	1.2.1.5,1.2.1.3
1467910580	Homovanillate	2.1.1.6
1467875643	Homocarnosine	6.3.2.11
1467881755	Hippurate	2.1.1.6
1467908112	Hexanoyl-CoA	1.3.1.8,1.3.1.38
1467908112	Hexanoyl-CoA	1.3.3.6
1467908112	Hexanoyl-CoA	1.3.3.6,1.3.8.1,1.3.8.4,1.3.8.7,1.3.8.8,1.3.99
1467908112	Hexanoyl-CoA	1.3.3.6,1.3.8.7,1.3.8.8,1.3.8.1,,1.3.8.5
1467908112	Hexanoyl-CoA	1.3.3.6,3.6.1.10
1467908112	Hexanoyl-CoA	1.3.8.7,1.3.8.8
1467908112	Hexanoyl-CoA	2.3.1.16,2.3.1.155,1.1.1.211
1467881737	Hexanoic acid	2.4.2.8
1467915162	Hexadecenal	1.2.1.3
1467868847	Hexadecanoic acid	1.14.19.3
1467868847	Hexadecanoic acid	1.2.1.48,1.2.1.3,3.6.1.10
1467868847	Hexadecanoic acid	2.3.1.38,2.3.1.41,2.3.1.85
1467868847	Hexadecanoic acid	2.3.1.85
1467868847	Hexadecanoic acid	2.3.1.85,3.1.2.14,3.1.1.5
1467868847	Hexadecanoic acid	2.5.1.26
1467868847	Hexadecanoic acid	3.1.1.1,3.1.1.-,3.1.1.63
1467868847	Hexadecanoic acid	3.1.2.14
1467868847	Hexadecanoic acid	3.1.2.14,3.1.2.21,2.3.1.85
1467868847	Hexadecanoic acid	3.1.2.2, 3.1.2.22,3.1.2.22,3.1.1.1
1467868847	Hexadecanoic acid	3.1.2.2,3.1.2.22
1467868847	Hexadecanoic acid	3.1.2.22,3.1.1.32,3.1.-.-,3.1.2.14,3.1.1.5
1467868847	Hexadecanoic acid	3.A.1.211.1
1467868847	Hexadecanoic acid	6.2.1.3
1467871850	Hexadecanal	1.2.1.48,1.2.1.3,3.6.1.10
1468185453	hexacosanoyl-CoA	2.3.1.21,2.3.1.7
1468185453	hexacosanoyl-CoA	3.1.2.2
1468185453	hexacosanoyl-CoA	6.2.1.3
1468150580	heptanoyl-CoA	1.3.8.7,1.3.99.-
1468150580	heptanoyl-CoA	2.3.1.16,1.1.1.211
1468288770	heptadecanoyl-CoA	1.14.19.1
1468288770	heptadecanoyl-CoA	1.3.8.7,1.3.8.8,1.3.8.9,1.3.99.-,
1468288770	heptadecanoyl-CoA	2.3.1.16,1.1.1.211
1468288770	heptadecanoyl-CoA	2.3.1.199
1468288770	heptadecanoyl-CoA	3.1.2.2
1468288770	heptadecanoyl-CoA	6.2.1.3
1467865953	Heme	4.4.1.17
1467865953	Heme	4.4.1.17,3.A.1.210
1468743043	Helianthol A	3.1.1.1
1467879966	HCO3-	2.A.31.2.1,2.A.31.2.8,2.6.1.7
1467879966	HCO3-	4.2.1.1
1467879966	HCO3-	6.3.4.16,6.3.5.5
1467879966	HCO3-	6.3.5.5
1467879966	HCO3-	6.3.5.5,6.3.4.16
1468424581	Harderoporphyrinogen	2.5.1.18
1467870385	Guanosine	2.A.41.2.4,2.A.41.2.6
1467868747	Guanine	2.4.2.7,2.4.2.8,2.4.2.22,3.6.1.10
1468589628	GSPGJ2	1.1.1.188,2.5.1.18
1468589614	GSPGA2	2.5.1.18
1467867475	GMP	2.4.2.7,2.4.2.8,2.4.2.22,3.6.1.10
1467867475	GMP	2.7.4.8
1467867475	GMP	3.1.11.2
1467867475	GMP	3.1.4.17,3.1.4.35
1467867475	GMP	3.6.1.13,3.6.1.6,3.1.4.35
1467867475	GMP	3.6.1.8, 3.6.1.-,3.6.1.-,3.6.1,3.6.1.19
1467867475	GMP	6.3.5.2
1467867475	GMP	6.3.5.2,6.3.4.1
1468441340	GM1	3.2.1.18
1467866177	Glyoxylate	1.1.1.21,1.1.1.26,1.1.1.79,1.1.1.81
1467866177	Glyoxylate	1.1.1.26,1.1.1.28,1.1.1.29,1.1.1.79,1.1.1.8,1.1.1.81,3.6.1.10
1467866177	Glyoxylate	1.1.1.79
1467885690	Glycylglycine	2.3.2.2
1467867702	Glycolate	1.1.1.21,1.1.1.26,1.1.1.79,1.1.1.81
1467867702	Glycolate	1.1.1.26,1.1.1.28,1.1.1.29,1.1.1.79,1.1.1.8,1.1.1.81,3.6.1.10
1467867702	Glycolate	1.1.1.79
1467867702	Glycolate	1.2.1.21,1.2.1.19,1.2.1.4,1.2.1.5,1.2.1.3
1467867702	Glycolate	3.1.3.18,3.1.3.29
1467869079	Glycolaldehyde	1.2.1.21,1.2.1.19,1.2.1.4,1.2.1.5,1.2.1.3
1467869079	Glycolaldehyde	4.1.2.17,4.1.2.19,4.1.2.13
1467867976	Glycogen	2.4.1.1
1467867976	Glycogen	3.2.1.1
1467867976	Glycogen	3.2.1.3
1467884711	Glycocholate	3.A.1.201.2
1467909746	Glycochenodeoxycholate	3.A.1.201.2
1467867028	Glycerone phosphate	4.1.2.13
1467867028	Glycerone phosphate	4.1.2.13,4.1.2
1467867028	Glycerone phosphate	4.1.2.13,4.1.2.40
1467867028	Glycerone phosphate	4.1.2.17,4.1.2.19,4.1.2.13
1467867028	Glycerone phosphate	4.1.2.29,4.1.2.13
1467867028	Glycerone phosphate	5.3.1.1
1467868000	Glycerone	2.2.1.3,2.2.1.1
1467868000	Glycerone	3.1.2.2
1467868000	Glycerone	4.1.2.13
1467868000	Glycerone	4.1.2.13,4.1.2.40
1467868000	Glycerone	6.2.1.3
1467867087	Glycerol	1.1.1.2, 1.1.1.21,1.1.1.72,1.1.1.372,1.1.1.21,1.1.1.1,3.6.1.10,1.1.1
1467867087	Glycerol	2.3.1.21
1467867087	Glycerol	3.1.1.1,3.1.1.23
1468285777	Gly-Cys	3.4.11.2
1467995939	Glutathione episulfonium ion	2.5.1.18
1467871969	Glutaryl-CoA	1.2.4.2, 1.8.1.4, 2.3.1.61,1.8.1.4
1467871969	Glutaryl-CoA	2.3.1,2.3.1.16
1467871969	Glutaryl-CoA	2.3.1.16,2.3.1
1467871969	Glutaryl-CoA	2.3.1.61
1467871481	Glutarate	1.2.4.1,3.6.1.10
1469405138	glutamine hydroxamate	6.3.4.2
1467886210	Glucomannan longer by one mannose unit	2.4.1.1
1467883757	Glucomannan	2.4.1.1
1467883757	Glucomannan	3.2.1.21,3.2.1.74,3.2.1.108,3.2.1.137,3.2.1.77,3.2.1.24
1468283135	Glu-Leu	3.4.11.1
1468622965	Glu-Cys	6.3.2.2
1469391152	Glc<sub>3</sub>Man<sub>9</sub>GlcNAc<sub>2</sub>	3.2.1.106,3.2.1.21
1469391075	Glc<sub>2</sub>Man<sub>9</sub>GlcNAc<sub>2</sub>	3.2.1.106,3.2.1.21
1469391075	Glc<sub>2</sub>Man<sub>9</sub>GlcNAc<sub>2</sub>	3.2.1.84
1467870003	Geranylgeranyl diphosphate	2.5.1.-,2.5.1.29,2.5.1
1467870003	Geranylgeranyl diphosphate	2.5.1.142,2.5.1.29
1467870003	Geranylgeranyl diphosphate	2.5.1.29
1467870003	Geranylgeranyl diphosphate	2.5.1.87,2.5.1.31
1467869865	Geranyl diphosphate	2.5.1.1,2.5.1.10,2.5.1.29
1467869865	Geranyl diphosphate	2.5.1.1,2.5.1.28,2.5.1.10
1467869865	Geranyl diphosphate	2.5.1.10
1467869865	Geranyl diphosphate	2.5.1.10,2.5.1.20,2.5.1.68,2.5.1.1,2.5.1.31
1467869865	Geranyl diphosphate	2.5.1.123,3.6.1.10,2.5.1.124,2.5.1.10
1467869865	Geranyl diphosphate	2.5.1.29
1467869865	Geranyl diphosphate	2.5.1.39,2.5.1.93
1467869865	Geranyl diphosphate	2.5.1.87,2.5.1.31
1467952032	Geranyl acetate	3.1.1,3.1.1.1,3.1.1.6
1467881024	Geraniol	1.1.1.347,1.1.1.1
1467881024	Geraniol	3.1.1,3.1.1.1,3.1.1.6
1468010592	Geranic acid	1.2.1.86,1.2.1.3
1467881010	Geranial	1.1.1.347,1.1.1.1
1467881010	Geranial	1.2.1.86,1.2.1.3
1467937179	Gentiodelphin	1.14.19.3
1467893192	gamma-Linolenoyl-CoA	1.14.19.3
1467893192	gamma-Linolenoyl-CoA	1.3.3.6
1467893192	gamma-Linolenoyl-CoA	1.3.8.7,1.3.8.8,1.3.8.9,1.3.99.-,
1467893192	gamma-Linolenoyl-CoA	2.3.1.16,1.1.1.211
1467893192	gamma-Linolenoyl-CoA	2.3.1.199
1467893192	gamma-Linolenoyl-CoA	2.3.1.21,2.3.1.7
1467893192	gamma-Linolenoyl-CoA	2.3.1.23
1467893192	gamma-Linolenoyl-CoA	3.1.2.2
1467893192	gamma-Linolenoyl-CoA	6.2.1.3
1467873367	gamma-L-Glutamyl-L-cysteine	6.3.2.2
1467873367	gamma-L-Glutamyl-L-cysteine	6.3.2.3
1468049553	gamma-L-Glutamyl-L-2-aminobutyrate	6.3.2.2
1468049553	gamma-L-Glutamyl-L-2-aminobutyrate	6.3.2.3
1467898142	gamma-L-Glutamyl-D-alanine	2.3.2.2
1467898142	gamma-L-Glutamyl-D-alanine	6.3.2.2
1467911549	gamma-Glutamyl-Se-methylselenocysteine	2.3.2.2
1467911685	gamma-Glutamyl-beta-cyanoalanine	2.3.2.2
1467915116	gamma-Glutamyl-beta-aminopropiononitrile	2.3.2.2
1468260905	gamma-Glu-Val	6.3.2.2
1468325644	gamma-Glu-Thr(1-)	6.3.2.2
1468258370	gamma-Glu-Leu	6.3.2.2
1468258378	gamma-Glu-Ile	6.3.2.2
1467880463	Gallate	2.1.2.2
1467880463	Gallate	2.7.1.1
1467880463	Gallate	6.3.4.13
1468582772	GalCer	3.2.1.18
1468825089	Fumonisin B3	1.1.1.35
1467867176	Fumarate	1.3.5.1
1467867176	Fumarate	1.3.5.1,1.3.5.4
1467867176	Fumarate	1.3.5.1,3.6.1.10
1467867176	Fumarate	4.2.1.2,4.2.1.31,4.2.1.36
1467867176	Fumarate	4.3.1.1
1467867176	Fumarate	4.3.2.2
1467866414	Formaldehyde	1.1.1.1
1467866414	Formaldehyde	1.1.1.244,1.1.1.1
1467866414	Formaldehyde	1.11.1.21,1.11.1.7,3.8.1.1
1467866414	Formaldehyde	1.11.1.6,1.11.1.7,1.11.1.21,1.11.1.8,1.11.2.2,3.6.1.10
1467866414	Formaldehyde	2.2.1.3,2.2.1.1
1467896342	Folinic acid	2.1.2.10
1468387639	Folate	1.5.1.3
1468387639	Folate	1.5.1.33,1.5.1.3
1468198157	FMN	2.1.1.45
1468198157	FMN	2.7.1.26
1468001828	Fluoroacetaldehyde	4.1.2.13
1468010840	Fluoride	2.5.1.18
1467880967	Ferulate	1.11.1.14,1.11.1.7
1467884666	Ferrocyanide	1.14.13.39,1.18.1.2
1467884666	Ferrocyanide	1.2.4.1,3.6.1.10
1467869680	Ferricyanide	1.14.13.39,1.18.1.2
1467869680	Ferricyanide	1.2.4.1,3.6.1.10
1468672537	FEMA 2886	1.2.1.3
1468714394	FEMA 2885	1.1.1.1
1468010991	Farnesoic acid	1.2.1.3,1.2.1.94
1468194493	FAD	1.3.3.6
1468194493	FAD	1.3.3.6,3.6.1.10
1468194493	FAD	1.3.5.1
1468194493	FAD	1.3.5.1,3.6.1.10
1468194493	FAD	1.3.8,1.3.99.3
1468194493	FAD	1.3.8.7
1468194493	FAD	1.3.99.3
1468194493	FAD	1.5.5.1,2.1.1.74,1.1.99.13
1468057101	F6P	2.2.1.1
1468057101	F6P	2.6.1.16
1468057101	F6P	2.7.1.1
1468057101	F6P	5.3.1.9
1467918955	Ethylene oxide	3.3.2.10,3.3.2.9
1467880104	Ethylene glycol	3.3.2.10,3.3.2.9
1468089822	ethyl propionate	3.1.1.1,3.1.1.2,3.5.1.4
1467875274	Ethyl acetate	3.1.1.1,3.1.1.2,3.1.1.25,3.1.1.6,3.1.1.73,4.2.3.er,3.5.1.4
1467869921	Ethanolamine phosphate	2.7.1.82
1467869921	Ethanolamine phosphate	2.7.7.14
1467868075	Ethanolamine	2.7.1.82
1467871246	Ethanol	1.1.1.1, 1.1.1.71,1.1.1.184,1.1.1.71
1467871246	Ethanol	1.1.1.1,1.1.99.8
1467871246	Ethanol	1.1.1.2, 1.1.1.71,1.1.1.71,1.1.1.1,3.6.1.10
1467871246	Ethanol	1.11.1.15
1467871246	Ethanol	3.1.1.1,3.1.1.2,3.1.1.25,3.1.1.6,3.1.1.73,4.2.3.er,3.5.1.4
1467871246	Ethanol	3.1.1.1,3.1.1.2,3.5.1.4
1467871246	Ethanol	3.1.3.1,3.1.3.18
1467871230	Estrone	1.1.1.148,1.1.1.210,1.1.1.62,1.1.1.64,1.1.1.51
1467871230	Estrone	1.1.1.148,1.1.1.51,1.1.1.62,1.1.1.209,1.1.1.64
1467871230	Estrone	1.1.1.62
1467907298	Estriol	1.1.1.62
1467876271	Estradiol-17beta	1.1.1.148,1.1.1.210,1.1.1.62,1.1.1.64,1.1.1.51
1467876271	Estradiol-17beta	1.1.1.148,1.1.1.51,1.1.1.62,1.1.1.209,1.1.1.64
1467876271	Estradiol-17beta	1.1.1.62
1467876271	Estradiol-17beta	2.8.2.1,2.8.2.2,2.8.2.4
1468352101	estra-1(10),4-diene-2,3,17-trione	2.5.1.18
1468352109	estra-1,5(10)-diene-3,4,17-trione	2.5.1.18
1467987852	Equol	2.8.2.1
1467970830	EPA	1.14.99.1
1467970830	EPA	3.1.2.2
1467970830	EPA	6.2.1.3
1468408045	Enkephalin L	1.13.11.B6,3.4.11.2
1468408045	Enkephalin L	3.4.11.2
1467885719	Eicosanoyl-CoA	1.3.3.6
1467885719	Eicosanoyl-CoA	1.3.8.8
1467885719	Eicosanoyl-CoA	2.3.1.179,2.3.1.41
1467885719	Eicosanoyl-CoA	2.3.1.199
1467885719	Eicosanoyl-CoA	3.1.2.2
1467885719	Eicosanoyl-CoA	3.1.2.2,3.1.2.20
1467885719	Eicosanoyl-CoA	6.2.1.3
1467980629	Ecgonine methyl ester	3.1.1.1,3.1.1.84
1467871159	dUTP	2.7.4.6
1467871159	dUTP	2.7.7.7
1467871159	dUTP	6.3.4.2
1467870149	dUMP	2.1.1.45
1467870149	dUMP	2.7.4.4,2.7.4.9,2.7.4.13,3.6.1.10
1467870149	dUMP	2.7.4.9
1467870149	dUMP	3.6.1,3.6.1.23,3.6.1.9,3.6.1.19
1467870149	dUMP	3.6.1.23
1467879916	dUDP	1.17.4.1
1467879916	dUDP	2.7.4.4,2.7.4.9,2.7.4.13,3.6.1.10
1467879916	dUDP	2.7.4.6
1467879916	dUDP	2.7.4.9
1467879916	dUDP	3.6.1.23
1467871146	dTTP	2.7.1.23
1467871146	dTTP	2.7.1.40
1467871146	dTTP	2.7.2.3
1467871146	dTTP	2.7.4.6
1467871146	dTTP	2.7.7.7
1467871146	dTTP	3.6.1.19,3.6.1.9
1467870132	dTMP	2.1.1.45
1467870132	dTMP	2.7.4.9
1467870132	dTMP	2.7.4.9, 2.7.4.12,2.7.4.12,2.7.4.13,3.6.1.10
1467870132	dTMP	3.1.11.2
1467870132	dTMP	3.6.1.19,3.6.1.9
1467870119	dTDP	2.7.1.23
1467870119	dTDP	2.7.1.40
1467870119	dTDP	2.7.4.6
1467870119	dTDP	2.7.4.9
1467870119	dTDP	2.7.4.9, 2.7.4.12,2.7.4.12,2.7.4.13,3.6.1.10
1468076707	drib	1.1.1.1
1467874972	Dopaquinone	2.5.1.18
1467984500	Dopamine 4-O-sulfate	2.8.2.1
1467984489	Dopamine 3-O-sulfate	2.8.2.1
1467898292	Dopamine	1.1.1.259,1.1.1.35,4.1.1.28
1467898292	Dopamine	1.11.1.7
1467898292	Dopamine	2.1.1.6
1467898292	Dopamine	2.8.2.1
1467898292	Dopamine	2.8.2.1,2.8.2.3
1468581102	Dolichyl phosphate D-mannose	2.4.1.109,2.4.1,2.4.1.258,2.4.1.259,2.4.1.260,2.4.1.261,2.3.2.B2,2.1.1.B114
1468581102	Dolichyl phosphate D-mannose	2.4.1.109,2.4.1.258,2.4.1.259,2.4.1.260,2.4.1.261
1468581102	Dolichyl phosphate D-mannose	2.4.1.259
1468581102	Dolichyl phosphate D-mannose	2.4.1.261
1468581102	Dolichyl phosphate D-mannose	2.4.1.83
1467867018	Dolichyl phosphate	2.4.1.109,2.4.1,2.4.1.258,2.4.1.259,2.4.1.260,2.4.1.261,2.3.2.B2,2.1.1.B114
1467867018	Dolichyl phosphate	2.4.1.109,2.4.1.258,2.4.1.259,2.4.1.260,2.4.1.261
1467867018	Dolichyl phosphate	2.4.1.117
1467867018	Dolichyl phosphate	2.4.1.259
1467867018	Dolichyl phosphate	2.4.1.261
1467867018	Dolichyl phosphate	2.4.1.267,2.4.1.265,2.4.1.256
1467867018	Dolichyl phosphate	2.4.1.83
1467867018	Dolichyl phosphate	2.7.1.108
1467867018	Dolichyl phosphate	2.7.8.15
1467867018	Dolichyl phosphate	3.6.1.43
1467872910	Dolichyl diphosphate	2.4.99.18
1467872910	Dolichyl diphosphate	3.6.1.43
1467879115	Dolichyl beta-D-glucosyl phosphate	2.4.1.117
1467879115	Dolichyl beta-D-glucosyl phosphate	2.4.1.267,2.4.1.265,2.4.1.256
1467879115	Dolichyl beta-D-glucosyl phosphate	2.4.1.83
1467870327	Dolichol	2.7.1.108
1467890574	Dodecanoic acid	2.3.1.85
1467890574	Dodecanoic acid	2.7.10.2
1467890574	Dodecanoic acid	3.1.1.1
1467890574	Dodecanoic acid	3.1.2.14,3.1.2.21
1467890574	Dodecanoic acid	3.1.2.2
1468011304	Docosenoyl-CoA	1.3.3.6
1468011304	Docosenoyl-CoA	1.3.8.7,1.3.8.8,1.3.8.9,1.3.99.-,
1468011304	Docosenoyl-CoA	2.3.1.16
1468011304	Docosenoyl-CoA	2.3.1.199
1468011304	Docosenoyl-CoA	2.3.1.21,2.3.1.7
1468011304	Docosenoyl-CoA	3.1.2.2
1468011304	Docosenoyl-CoA	6.2.1.3
1468011272	Docosanoyl-CoA	2.3.1.199
1468011272	Docosanoyl-CoA	3.1.2.2
1468011272	Docosanoyl-CoA	6.2.1.3
1467922201	DKHP	4.1.2.29,4.1.2.13
1468451088	Divalonic acid	1.1.1.34
1467879906	dITP	2.7.4.6
1467879906	dITP	3.6.1.19,3.6.1.-,3.6.1.66
1467869065	Dithiothreitol	2.7.1.23
1467869065	Dithiothreitol	2.7.4.6
1469347711	diphthine	2.1.1.98
1469340831	dioleoyl phosphatidylethanolamine	2.3.1.23
1467990675	Dinitrochlorobenzene	2.5.1.18
1467868655	Dimethylallyl diphosphate	2.5.1,2.5.1.1
1467868655	Dimethylallyl diphosphate	2.5.1.1,2.5.1.10,2.5.1.29
1467868655	Dimethylallyl diphosphate	2.5.1.1,2.5.1.28,2.5.1.10
1467868655	Dimethylallyl diphosphate	2.5.1.10
1467868655	Dimethylallyl diphosphate	2.5.1.142,2.5.1.29
1467868655	Dimethylallyl diphosphate	2.5.1.92,2.5.1.10
1467899341	Dihydrotestosterone	1.1.1.53,1.1.1.105
1467899341	Dihydrotestosterone	1.3.1.22,1.3.1.3,1.3.99.5
1467876008	Dihydropteroate	6.3.2.12,6.3.2.17
1467876008	Dihydropteroate	6.3.2.17
1467872504	Dihydrolipoamide	1.6.2.6,1.8.1,1.8.1.4
1467872504	Dihydrolipoamide	1.8.1.4
1467872504	Dihydrolipoamide	1.8.1.4,2.1.2.10,1.8.1
1467872504	Dihydrolipoamide	2.1.2.10
1467872504	Dihydrolipoamide	2.3.1.12,2.3.1.168
1467872504	Dihydrolipoamide	2.3.1.61
1467870719	Dihydrofolate	1.5.1.3
1467870719	Dihydrofolate	1.5.1.3,1.5.1.5
1467870719	Dihydrofolate	2.1.1.45
1467870719	Dihydrofolate	2.1.1.45,2.1.1.54
1467870719	Dihydrofolate	2.1.2.3
1467870719	Dihydrofolate	6.3.2.12,6.3.2.17
1467870719	Dihydrofolate	6.3.2.17
1467894840	Dihomo-gamma-linolenate	3.1.2.14
1467894840	Dihomo-gamma-linolenate	3.1.2.2
1467894840	Dihomo-gamma-linolenate	3.A.1.211.1
1467894840	Dihomo-gamma-linolenate	6.2.1.3
1467887617	Digalacturonate	2.7.11.12
1467879896	dIDP	2.7.4.6
1467903462	di-trans,poly-cis-Decaprenyl diphosphate	2.5.1.39
1467903462	di-trans,poly-cis-Decaprenyl diphosphate	2.5.1.86,2.5.1.91
1467903462	di-trans,poly-cis-Decaprenyl diphosphate	2.5.1.91
1468586811	DHLTB4	6.2.1.3
1467869250	dGTP	2.7.1.23
1467869250	dGTP	2.7.1.40
1467869250	dGTP	2.7.4.6
1467869250	dGTP	2.7.7.7
1467870104	dGMP	2.7.4.12,2.7.4.8,3.6.1.10
1467870104	dGMP	2.7.4.8
1467870104	dGMP	3.1.11.2
1467870093	dGDP	1.17.4.1
1467870093	dGDP	2.7.1.23
1467870093	dGDP	2.7.1.40
1467870093	dGDP	2.7.4.12,2.7.4.8,3.6.1.10
1467870093	dGDP	2.7.4.6
1467870093	dGDP	2.7.4.8
1467870093	dGDP	2.7.7.7
1467874918	DGAL	1.2.1.3
1467874918	DGAL	3.2.1.18
1468463561	DG(34:0)	3.1.3.4
1467922588	Desipramine	2.1.1.49
1467875621	Dephospho-CoA	2.7.1.24
1467875621	Dephospho-CoA	2.7.7.3
1467871955	Deoxyuridine	2.A.41.2.3,2.A.41.2.6
1467910150	Deoxyinosine	2.A.41.2.4,2.A.41.2.6
1468094448	deoxyhypusine	2.5.1.46
1467869751	Deoxyguanosine	2.A.41.2.4,2.A.41.2.6
1467875609	Deoxycytidine	2.A.41.2.3,2.A.41.2.6
1467872331	Deoxyadenosine	2.A.41.2.3,2.A.41.2.6
1467896427	Deoxy-5-methylcytidylate	2.1.1.45,2.1.1.54
1469414645	densipoloyl-CoA	2.3.1.199
1469414645	densipoloyl-CoA	2.3.1.23
1467913714	Delta-12-Prostaglandin J2	1.1.1.188
1468009231	Delphinidin 3,5,3'-triglucoside	1.14.19.3
1468005215	Dehydrospermidine	2.5.1.46
1467909303	Dehydroascorbate	1.11.1.11,5.3.4.1
1468001883	Decylubiquinol	1.3.5.2,1.3.98.1
1467908162	Decanoyl-CoA	1.1.1,1.3.99.3
1467908162	Decanoyl-CoA	1.3.1.38,1.3.1.8
1467908162	Decanoyl-CoA	1.3.1.8,1.3.1.38
1467908162	Decanoyl-CoA	1.3.3.6
1467908162	Decanoyl-CoA	1.3.3.6,1.3.8.7,1.3.8.8,1.3.99.-,1.3.99
1467908162	Decanoyl-CoA	1.3.3.6,3.6.1.10
1467908162	Decanoyl-CoA	1.3.8.7,1.3.8.8
1467908162	Decanoyl-CoA	2.3.1.137,2.3.1.21,2.3.1.7
1467908162	Decanoyl-CoA	2.3.1.16
1467908162	Decanoyl-CoA	2.3.1.16,2.3.1.155,1.1.1.211
1467908162	Decanoyl-CoA	2.3.1.51
1467908162	Decanoyl-CoA	2.3.1.86
1467908162	Decanoyl-CoA	3.1.2.2
1467881636	Decanoic acid	2.3.1.85
1467881636	Decanoic acid	3.1.2.14,3.1.2.21
1467881636	Decanoic acid	3.1.2.2
1467881636	Decanoic acid	6.2.1.11,6.2.1.2,6.2.1.3
1467875359	Deamino-NAD+	1.1.1,1.3.99.3
1467875359	Deamino-NAD+	1.1.1.1
1467875359	Deamino-NAD+	1.1.1.1, 1.1.1.105,1.1.1.105,1.1.1.315,1.1.1.-,3.6.1.10,1.1.1
1467875359	Deamino-NAD+	1.1.1.1, 1.1.1.71,1.1.1.184,1.1.1.71
1467875359	Deamino-NAD+	1.1.1.1, 1.1.1.73,1.1.1.284,1.1.1.73
1467875359	Deamino-NAD+	1.1.1.1,1.1.1,1.1.99.1
1467875359	Deamino-NAD+	1.1.1.1,1.14.15.15
1467875359	Deamino-NAD+	1.1.1.10,1.1.1.14,1.1.1.15,1.1.1.9,1.1.1.B19,1.1.1.11,1.1.1.12,1.1.1.13,1.1.1.56,1.1.1.250
1467875359	Deamino-NAD+	1.1.1.11,1.1.1.67,1.1.1.14,1.1.1.15,1.1.1.12
1467875359	Deamino-NAD+	1.1.1.148,1.1.1.210,1.1.1.62,1.1.1.64,1.1.1.51
1467875359	Deamino-NAD+	1.1.1.15,1.1.1.12,1.1.1.14
1467875359	Deamino-NAD+	1.1.1.163,1.1.1.1
1467875359	Deamino-NAD+	1.1.1.202,1.1.1.1,3.6.1.10
1467875359	Deamino-NAD+	1.1.1.205
1467875359	Deamino-NAD+	1.1.1.211,1.1.1
1467875359	Deamino-NAD+	1.1.1.211,1.1.1,1.1.1.35
1467875359	Deamino-NAD+	1.1.1.244,1.1.1.1
1467875359	Deamino-NAD+	1.1.1.26,1.1.1.29,1.1.1.81,1.1.1.27,1.1.1.79,3.6.1.10
1467875359	Deamino-NAD+	1.1.1.265,1.1.1.1
1467875359	Deamino-NAD+	1.1.1.31,1.1.1.35
1467875359	Deamino-NAD+	1.1.1.311,1.1.1.1
1467875359	Deamino-NAD+	1.1.1.347,1.1.1.1
1467875359	Deamino-NAD+	1.1.1.35
1467875359	Deamino-NAD+	1.1.1.35,1.1.1,1.1.1.211
1467875359	Deamino-NAD+	1.1.1.35,1.1.1.157
1467875359	Deamino-NAD+	1.1.1.35,1.1.1.178
1467875359	Deamino-NAD+	1.1.1.35,1.1.1.211
1467875359	Deamino-NAD+	1.1.1.35,1.1.1.211,1.1.1.M19
1467875359	Deamino-NAD+	1.1.1.35,1.1.1.259
1467875359	Deamino-NAD+	1.1.1.406,1.1.1.15,1.1.1.16,1.1.1.407,1.1.1.12
1467875359	Deamino-NAD+	1.1.1.41,1.1.1.286
1467875359	Deamino-NAD+	1.1.1.53,1.1.1.105
1467875359	Deamino-NAD+	1.1.1.62
1467875359	Deamino-NAD+	1.1.1.75,2.3.1.37
1467875359	Deamino-NAD+	1.1.1.78,1.1.1.79,1.1.1.6,1.1.1.21,1.1.1.81,3.6.1.10
1467875359	Deamino-NAD+	1.1.1.90,1.1.1.1
1467875359	Deamino-NAD+	1.1.1.90,1.1.1.1,3.6.1.10
1467875359	Deamino-NAD+	1.1.1.90,1.1.1.71,1.1.1.1
1467875359	Deamino-NAD+	1.1.1.95
1467875359	Deamino-NAD+	1.1.1.95,1.1.1.399,1.1.1.272,3.6.1.10
1467875359	Deamino-NAD+	1.14.19.3
1467875359	Deamino-NAD+	1.2.1.12,1.2.1.59,1.2.1.13
1467875359	Deamino-NAD+	1.2.1.19,1.2.1.22,1.2.1.24,1.2.1.26,1.2.1.28,1.2.1.3,1.2.1.31,1.2.1.32,1.2.1.36,1.2.1.48,1.2.1.5,1.2.1.69,1.2.1.8,1.2.1.88,1.2.1,3.6.1.10
1467875359	Deamino-NAD+	1.2.1.19,1.2.1.24,1.2.1.3,1.2.1.32,1.2.1.4,1.2.1.5,1.2.1.8
1467875359	Deamino-NAD+	1.2.1.21,1.2.1.19,1.2.1.4,1.2.1.5,1.2.1.3
1467875359	Deamino-NAD+	1.2.1.22,1.2.1.3,1.2.1.4,1.2.1.5,1.2.1.23
1467875359	Deamino-NAD+	1.2.1.25,1.2.4.4
1467875359	Deamino-NAD+	1.2.1.3
1467875359	Deamino-NAD+	1.2.1.3, 1.2.1.19,1.2.1.-,1.2.1,1.2.1.19,3.6.1.10
1467875359	Deamino-NAD+	1.2.1.3, 1.2.1.47,1.2.1.47
1467875359	Deamino-NAD+	1.2.1.3,1.17.1.4,1.2.1.4,1.2.1.5
1467875359	Deamino-NAD+	1.2.1.3,1.2.1.4,1.2.1.5
1467875359	Deamino-NAD+	1.2.1.3,1.2.1.5, 1.2.1.19,1.2.1,3.6.1.10
1467875359	Deamino-NAD+	1.2.1.3,1.2.1.5,1.17.1.4,1.2.1.4
1467875359	Deamino-NAD+	1.2.1.3,1.2.1.5,1.2.1.99
1467875359	Deamino-NAD+	1.2.1.3,1.2.1.89,1.2.1.19
1467875359	Deamino-NAD+	1.2.1.3,1.2.1.94
1467875359	Deamino-NAD+	1.2.1.3,1.2.3.1
1467875359	Deamino-NAD+	1.2.1.41
1467875359	Deamino-NAD+	1.2.1.48,1.2.1.3,3.6.1.10
1467875359	Deamino-NAD+	1.2.1.5,1.2.1.3
1467875359	Deamino-NAD+	1.2.1.54,1.2.1.3
1467875359	Deamino-NAD+	1.2.1.86,1.2.1.3
1467875359	Deamino-NAD+	1.2.1.90,1.2.1.3
1467875359	Deamino-NAD+	1.2.4.1, 1.8.1.4, 2.3.1.12,2.3.1.12,1.8.1.4,1.2.1.51
1467875359	Deamino-NAD+	1.2.4.2, 1.8.1.4, 2.3.1.61,1.8.1.4
1467875359	Deamino-NAD+	1.3.1.14
1467875359	Deamino-NAD+	1.3.1.21,1.14.15.6
1467875359	Deamino-NAD+	1.3.99.3
1467875359	Deamino-NAD+	1.5.1.15,1.5.1.5
1467875359	Deamino-NAD+	1.5.1.3
1467875359	Deamino-NAD+	1.6.5.8,1.6.5.3
1467875359	Deamino-NAD+	1.8.1.4,2.1.2.10,1.8.1
1467875359	Deamino-NAD+	2.5.1.46
1467875359	Deamino-NAD+	2.7.7.1, 2.7.7.18,2.7.7.18
1467875359	Deamino-NAD+	2.7.7.1,2.7.7.18
1467871133	dCTP	1.17.4.1
1467871133	dCTP	2.7.1.23
1467871133	dCTP	2.7.2.3
1467871133	dCTP	2.7.4.6
1467871133	dCTP	2.7.7.41
1467871133	dCTP	2.7.7.7
1467871133	dCTP	2.7.7.7,2.7.7.49
1467871133	dCTP	3.6.1,3.6.1.23,3.6.1.9,3.6.1.19
1467871133	dCTP	3.6.1.65,3.6.1.12,3.6.1.23
1467871133	dCTP	6.3.4.2
1467868718	dCMP	2.1.1.45,2.1.1.54
1467868718	dCMP	2.7.4.3,2.7.4.14
1467868718	dCMP	3.1.11.2
1467868718	dCMP	3.6.1.65,3.6.1.12,3.6.1.23
1467873724	dCDP	1.17.4.1
1467873724	dCDP	1.17.4.1,1.17.4.2
1467873724	dCDP	2.7.1.23
1467873724	dCDP	2.7.2.3
1467873724	dCDP	2.7.4.3,2.7.4.14
1467873724	dCDP	2.7.4.6
1467884615	Daunorubicin	1.1.1.184,1.1.1.188
1467867300	dATP	2.7.1.1
1467867300	dATP	2.7.1.1,2.7.1.2
1467867300	dATP	2.7.1.1,2.7.1.4
1467867300	dATP	2.7.1.1,2.7.1.7
1467867300	dATP	2.7.1.23
1467867300	dATP	2.7.1.40
1467867300	dATP	2.7.2.3
1467867300	dATP	2.7.4.3
1467867300	dATP	2.7.4.6
1467867300	dATP	2.7.4.8
1467867300	dATP	2.7.4.9
1467867300	dATP	2.7.7.7
1467867300	dATP	3.6.1.19,3.6.1.9
1467870079	dAMP	2.7.4.3
1467870079	dAMP	2.7.4.3,2.7.4.11,2.7.4.13,3.6.1.10
1467870079	dAMP	3.1.11.2
1467870079	dAMP	3.1.4.17
1467870079	dAMP	3.6.1.19,3.6.1.9
1467868301	dADP	1.17.4.1
1467868301	dADP	2.7.1.1
1467868301	dADP	2.7.1.1,2.7.1.2
1467868301	dADP	2.7.1.1,2.7.1.4
1467868301	dADP	2.7.1.1,2.7.1.7
1467868301	dADP	2.7.1.23
1467868301	dADP	2.7.1.40
1467868301	dADP	2.7.2.3
1467868301	dADP	2.7.4.3
1467868301	dADP	2.7.4.3,2.7.4.11,2.7.4.13,3.6.1.10
1467868301	dADP	2.7.4.6
1467868301	dADP	2.7.4.8
1467868301	dADP	2.7.4.9
1467867962	D-Xylose	1.1.1.21,1.1.1.307,1.1.1.188,1.1.1.2
1468081077	D-RIBULOSE-1-P	4.1.2.17,4.1.2.19,4.1.2.13
1467868222	D-Ribulose 5-phosphate	1.1.1.44
1467868222	D-Ribulose 5-phosphate	1.1.1.44,1.1.1.351
1467868222	D-Ribulose 5-phosphate	2.2.1.1
1467868222	D-Ribulose 5-phosphate	2.2.1.1,2.2.1.3
1467868222	D-Ribulose 5-phosphate	2.2.1.3,2.2.1.1
1467868222	D-Ribulose 5-phosphate	5.3.1.6,5.3.1.9
1467867103	D-Ribose 5-phosphate	2.2.1.1
1467867103	D-Ribose 5-phosphate	2.2.1.1,2.2.1.3
1467867103	D-Ribose 5-phosphate	4.2.1.70
1467867103	D-Ribose 5-phosphate	5.3.1.6,5.3.1.9
1467867163	D-Ribose	2.7.1.1
1467883683	D-Norvaline	6.1.1.4
1467883683	D-Norvaline	6.3.2.2
1467900348	D-myo-Inositol 3,4-bisphosphate	2.7.1.151
1467900348	D-myo-Inositol 3,4-bisphosphate	2.7.1.151,2.7.1.68
1467900348	D-myo-Inositol 3,4-bisphosphate	3.1.3.67
1467902054	D-myo-Inositol 1,2-cyclic phosphate	3.1.4.11
1467873168	D-Mannitol 1-phosphate	2.7.1.1
1468285411	D-Leu-Gly	3.4.11.1
1468310996	D-glycero-D-altro-octulose-1,8-bisphosphate	4.1.2.13
1467868986	D-Glycerate	1.1.1.26,1.1.1.29,1.1.1.81,1.1.1.27,1.1.1.79,3.6.1.10
1467868986	D-Glycerate	1.1.1.79
1467868986	D-Glycerate	1.1.1.79,1.1.1.81,1.1.1,3.6.1.10
1467868986	D-Glycerate	1.2.1.3
1467868986	D-Glycerate	1.2.1.3,1.2.1.89,1.2.1.19
1467867117	D-Glyceraldehyde 3-phosphate	1.2.1.12
1467867117	D-Glyceraldehyde 3-phosphate	1.2.1.12,1.2.1.59,1.2.1.13
1467867117	D-Glyceraldehyde 3-phosphate	1.2.1.12,3.6.1.10
1467867117	D-Glyceraldehyde 3-phosphate	1.2.1.13,1.2.1.59,1.2.1.12
1467867117	D-Glyceraldehyde 3-phosphate	1.2.1.90,1.2.1.3
1467867117	D-Glyceraldehyde 3-phosphate	2.2.1.1
1467867117	D-Glyceraldehyde 3-phosphate	2.2.1.1,2.2.1.3
1467867117	D-Glyceraldehyde 3-phosphate	2.2.1.2,2.2.1.1
1467867117	D-Glyceraldehyde 3-phosphate	2.2.1.3,2.2.1.1
1467867117	D-Glyceraldehyde 3-phosphate	4.1.2.13,4.1.2.40
1467867117	D-Glyceraldehyde 3-phosphate	5.3.1.1
1467872492	D-Glyceraldehyde	1.1.1.2, 1.1.1.21,1.1.1.72,1.1.1.372,1.1.1.21,1.1.1.1,3.6.1.10,1.1.1
1467872492	D-Glyceraldehyde	1.2.1.12
1467872492	D-Glyceraldehyde	1.2.1.3
1467872492	D-Glyceraldehyde	1.2.1.3,1.2.1.89,1.2.1.19
1467872492	D-Glyceraldehyde	4.1.2.13
1467890488	D-Glucuronolactone	1.2.1.3
1467868103	D-Glucuronate	1.2.1.3
1467868103	D-Glucuronate	2.4.1.17,4.1.1.35
1467868103	D-Glucuronate	2.7.11.12
1467866763	D-Glucose 6-phosphate	1.1.1.48,1.1.1.49
1467866763	D-Glucose 6-phosphate	1.1.1.49
1467866763	D-Glucose 6-phosphate	1.1.1.49,1.1.1.363,1.1.1.47
1467866763	D-Glucose 6-phosphate	2.7.1.1
1467866763	D-Glucose 6-phosphate	2.7.1.1, 2.7.1.2,2.7.1.2,2.7.1.7,2.7.1.55,2.7.1.4
1467866763	D-Glucose 6-phosphate	2.7.1.1,2.7.1.2
1467866763	D-Glucose 6-phosphate	2.7.1.1,2.7.1.7
1467866763	D-Glucose 6-phosphate	2.7.1.147
1467866763	D-Glucose 6-phosphate	2.7.1.61,2.7.1.63,2.7.1.1
1467866763	D-Glucose 6-phosphate	2.7.1.7,2.7.1.1,2.7.1.2
1467866763	D-Glucose 6-phosphate	5.3.1.9
1467866763	D-Glucose 6-phosphate	5.3.1.9,5.3.1.8,5.3.1.6,5.3.1.26
1467866763	D-Glucose 6-phosphate	5.4.2.2,5.4.2.5,5.4.2.8,5.4.2.6,5.4.2.10,3.6.1.10
1467866916	D-Glucose 1-phosphate	2.4.1.1
1467866916	D-Glucose 1-phosphate	2.4.1.30,2.4.1.1,2.4.1.97,2.4.1.49,2.4.1.340,3.6.1.10,2.4.1.139
1467866916	D-Glucose 1-phosphate	2.7.7,2.7.7.22,2.7.7.69,2.7.7.78
1467866916	D-Glucose 1-phosphate	2.7.7.13,2.7.7.34
1467866916	D-Glucose 1-phosphate	2.7.7.22,2.7.7.69,2.7.7.78,2.7.7.13
1467866916	D-Glucose 1-phosphate	2.7.7.28,2.7.7.13
1467866916	D-Glucose 1-phosphate	2.7.7.37,2.4.1.1,2.7.7.22
1467866916	D-Glucose 1-phosphate	5.4.2.2,5.4.2.5,5.4.2.6,5.2.2.2,5.4.2.8
1467866916	D-Glucose 1-phosphate	5.4.2.2,5.4.2.5,5.4.2.8,5.4.2.6,5.4.2.10,3.6.1.10
1467865936	D-Glucose	1.1.1.330,1.1.1.120
1467865936	D-Glucose	2.7.1.1
1467865936	D-Glucose	2.7.1.1, 2.7.1.2,2.7.1.2,2.7.1.7,2.7.1.55,2.7.1.4
1467865936	D-Glucose	2.7.1.1,2.7.1.2
1467865936	D-Glucose	2.7.1.1,2.7.1.2,2.7.1.147
1467865936	D-Glucose	2.7.1.1,2.7.1.55
1467865936	D-Glucose	2.7.1.1,2.7.1.7
1467865936	D-Glucose	2.7.1.147
1467865936	D-Glucose	2.7.1.2
1467865936	D-Glucose	2.7.1.2,2.7.1.6
1467865936	D-Glucose	2.7.1.61,2.7.1.63,2.7.1.1
1467865936	D-Glucose	2.7.1.7,2.7.1.1,2.7.1.2
1467865936	D-Glucose	3.1.6.4,3.2.1.18,3.2.1.23,3.4.16.5,3.2.1.22,3.2.1.45,3.2.1.62,3.2.1.33,3.2.1.21,3.2.1.46,3.2.1.47,3.2.1.107,3.2.1.106,3.2.1.84,3.2.1.113,3.2.1.114,3.2.1.58,3.2.1.137,3.2.1.10,3.2.1.3,3.2.1.39,3.2.1.25,3.2.1.24,3.2.1.145,3.2.1.146,3.2.1.163,3.6.1.10,3.2.1.59,3.2.1.74,3.2.1.108,3.2.1.78,3.2.1.20
1467865936	D-Glucose	3.2.1,3.2.1.10,3.2.1.20,3.2.1.3,3.2.1.84,3.1.27.2,3.2.1.21,3.2.1.39,3.2.1.24
1467865936	D-Glucose	3.2.1.1
1467865936	D-Glucose	3.2.1.10
1467865936	D-Glucose	3.2.1.10,3.2.1.20,3.2.1.48
1467865936	D-Glucose	3.2.1.10,3.2.1.22,3.2.1.163,3.2.1.205,3.2.1.21,3.2.1.20,3.6.1.10
1467865936	D-Glucose	3.2.1.106
1467865936	D-Glucose	3.2.1.106,3.2.1.21
1467865936	D-Glucose	3.2.1.20,3.2.1.1
1467865936	D-Glucose	3.2.1.20,3.2.1.10,3.2.1.48,3.2.1.26,2.4.1.10,3.6.1.10
1467865936	D-Glucose	3.2.1.20,3.2.1.33,3.2.1.3
1467865936	D-Glucose	3.2.1.21,3.2.1.20,3.2.1.74,3.2.1.108,3.2.1.23,3.2.1.22,3.2.1.10,3.6.1.10
1467865936	D-Glucose	3.2.1.21,3.2.1.23,3.2.1.45,3.2.1.106,3.2.1.126,3.2.1.20
1467865936	D-Glucose	3.2.1.21,3.2.1.74,3.2.1.108,3.2.1.137,3.2.1.77,3.2.1.24
1467865936	D-Glucose	3.2.1.22,3.2.1.21,3.6.1.10,3.2.1.10
1467865936	D-Glucose	3.2.1.24
1467865936	D-Glucose	3.2.1.24,3.2.1,3.2.1.33,3.2.1.3,3.2.1.106,3.2.1.84,3.2.1.113,3.2.1.114,3.1.6.4,3.2.1.18,3.2.1.23,3.4.16.5,4.2.1.134,3.2.1.45
1467865936	D-Glucose	3.2.1.24,3.2.1.21,3.2.1.25
1467865936	D-Glucose	3.2.1.24,3.2.1.62
1467865936	D-Glucose	3.2.1.25,3.2.1.3,3.2.1.10
1467865936	D-Glucose	3.2.1.28,3.2.1.10,3.2.1.20
1467865936	D-Glucose	3.2.1.3
1467865936	D-Glucose	3.2.1.3,3.2.1.10
1467865936	D-Glucose	3.2.1.51,3.2.1.24
1467865936	D-Glucose	3.2.1.54,3.2.1.aq,3.2.1.1,3.2.1.133,3.2.1.2
1467865936	D-Glucose	3.2.1.74,3.2.1,3.2.1.1,3.2.1.20,3.2.1.21,3.6.1.10
1467865936	D-Glucose	3.2.1.84
1467865936	D-Glucose	5.4.2.2,5.4.2.5,5.4.2.6,5.2.2.2,5.4.2.8
1467869989	D-Glucosamine 6-phosphate	2.6.1.16
1467869989	D-Glucosamine 6-phosphate	2.7.1.1
1467869989	D-Glucosamine 6-phosphate	2.7.1.1, 2.7.1.8,2.7.1.8,2.7.1.2
1467869989	D-Glucosamine 6-phosphate	2.7.1.1,2.7.1.8
1467869989	D-Glucosamine 6-phosphate	2.7.1.147
1467869737	D-Glucosamine	2.7.1.1
1467869737	D-Glucosamine	2.7.1.1, 2.7.1.8,2.7.1.8,2.7.1.2
1467869737	D-Glucosamine	2.7.1.1,2.7.1.8
1467869737	D-Glucosamine	2.7.1.147
1467879032	D-Glucono-1,5-lactone 6-phosphate	1.1.1.49
1467879032	D-Glucono-1,5-lactone 6-phosphate	1.1.1.49,1.1.1.363,1.1.1.47
1468285435	D-gamma-Glu-Gly	6.3.2.2
1467898462	D-Galactosamine 1-phosphate	2.7.7,2.7.7.13,2.7.7.30
1467866662	D-Fructose 6-phosphate	2.2.1.1,2.2.1.3
1467866662	D-Fructose 6-phosphate	2.2.1.2,2.2.1.1
1467866662	D-Fructose 6-phosphate	2.6.1.16
1467866662	D-Fructose 6-phosphate	2.7.1.1
1467866662	D-Fructose 6-phosphate	2.7.1.1, 2.7.1.4,2.7.1.4,2.7.1.2
1467866662	D-Fructose 6-phosphate	2.7.1.1,2.7.1.4
1467866662	D-Fructose 6-phosphate	2.7.1.4,2.7.1.1
1467866662	D-Fructose 6-phosphate	4.1.2.13
1467866662	D-Fructose 6-phosphate	5.3.1.9,5.3.1.8,5.3.1.6,5.3.1.26
1467870021	D-Fructose 1,6-bisphosphate	4.1.2.13,4.1.2.40
1467877616	D-Fructose 1-phosphate	4.1.2.13
1467866805	D-Fructose	1.1.1.11,1.1.1.67,1.1.1.14,1.1.1.15,1.1.1.12
1467866805	D-Fructose	2.7.1.1
1467866805	D-Fructose	2.7.1.1, 2.7.1.4,2.7.1.4,2.7.1.2
1467866805	D-Fructose	2.7.1.1,2.7.1.4
1467866805	D-Fructose	2.7.1.4,2.7.1.1
1467866805	D-Fructose	3.2.1.20,3.2.1.10,3.2.1.48,3.2.1.26,2.4.1.10,3.6.1.10
1467869180	D-Erythrose 4-phosphate	1.2.1.12
1467869180	D-Erythrose 4-phosphate	2.2.1.1
1467869180	D-Erythrose 4-phosphate	2.2.1.1,2.2.1.3
1467869180	D-Erythrose 4-phosphate	2.2.1.2,2.2.1.1
1467869180	D-Erythrose 4-phosphate	4.1.2.13
1467869180	D-Erythrose 4-phosphate	4.1.2.13,4.1.2
1467877803	D-Arabinose 5-phosphate	2.2.1.1
1467877803	D-Arabinose 5-phosphate	2.7.1.1
1467877803	D-Arabinose 5-phosphate	4.2.1.70
1467896394	D-4'-Phosphopantothenate	2.7.1.33
1467896394	D-4'-Phosphopantothenate	6.3.2,6.3.2.5
1467896394	D-4'-Phosphopantothenate	6.3.2.5
1467887498	D-2-Aminobutyrate	2.3.2.2
1467887498	D-2-Aminobutyrate	6.1.1.16
1467887498	D-2-Aminobutyrate	6.3.2.2
1467870314	Cytosine	2.1.1.37
1469288855	cytochrome c	1.10.2.2
1469288855	cytochrome c	4.4.1.17
1467871323	Cytidine	2.A.41.2.3,2.A.41.2.6
1468622262	Cys-Leu	3.4.11.1
1467880428	Cys-Gly	2.3.2.2
1467880428	Cys-Gly	3.4.11.1,3.4.11.2,3.4.11.23,3.4.13.-,3.4.13
1467880428	Cys-Gly	3.4.19.13,3.4.19,2.3.2.2,3.4.11.4
1467872308	Cyclopentanone	1.1.1.163,1.1.1.1
1467885546	Cyclopentanol	1.1.1.1
1467885546	Cyclopentanol	1.1.1.163,1.1.1.1
1467870707	Cyclohexanone	1.1.1.1,1.1.1.163,1.1.1.245
83313	Cyclohexanol	1.1.1.1,1.1.1.163,1.1.1.245
1467867901	Cyanide ion	2.5.1.18
1467866360	CTP	2.7.1.108
1467866360	CTP	2.7.1.108,2.7.1.174
1467866360	CTP	2.7.1.36
1467866360	CTP	2.7.1.40
1467866360	CTP	2.7.2.3
1467866360	CTP	2.7.4.6
1467866360	CTP	2.7.4.6,2.7.4.3
1467866360	CTP	2.7.7.14
1467866360	CTP	2.7.7.15
1467866360	CTP	2.7.7.15,2.7.7.41,3.6.1.10,2.7.7.6
1467866360	CTP	2.7.7.15,2.7.7.57
1467866360	CTP	2.7.7.33,2.7.7.15
1467866360	CTP	2.7.7.41
1467866360	CTP	2.7.7.6,2.7.7.48,2.7.7.19
1467866360	CTP	2.7.7.90,2.7.7.41,2.7.7.43,2.7.7.72,2.7.7.60
1467866360	CTP	6.3.2.5
1467866360	CTP	6.3.4.2
1468226072	crotyl alcohol	1.1.1.1
1467875551	Crotonoyl-CoA	1.3.3.6
1467875551	Crotonoyl-CoA	1.3.3.6,1.3.8.7,1.3.99.-,1.3.8.1,1.3.8.4,1.3.99.3
1467875551	Crotonoyl-CoA	1.3.3.6,3.6.1.10
1467875551	Crotonoyl-CoA	1.3.8.7
1467875551	Crotonoyl-CoA	4.2.1.17,4.2.1.55,4.2.1.119
1467874296	Cortisone	1.3.1.22,1.1.1.146
1467874296	Cortisone	1.3.1.22,1.3.1.3
1467894939	Coproporphyrinogen III	4.1.1.37
1467912063	Coproporphyrinogen I	4.1.1.37
1469438498	coniferyl alcohol radical	1.11.1.7
1467872641	Coniferyl alcohol	1.11.1.21,1.11.1.7
1467872641	Coniferyl alcohol	1.11.1.7
1467880389	Cocaine	3.1.1.1
1467880389	Cocaine	3.1.1.1,3.1.1.84
1467880389	Cocaine	3.1.1.1,3.1.1.84,3.1.1.56
1468587417	CoA-20-COOH-18(R)-OH-LTE(,4)	1.1.1.35,1.1.1.211
1468587417	CoA-20-COOH-18(R)-OH-LTE(,4)	4.2.1.17
1467868692	CO	1.1.1.34
1467868692	CO	1.2.1.25,2.3.1.61,1.2.1.27
1467868692	CO	2.3.1.12
1467868692	CO	2.3.1.21
1467868692	CO	2.3.1.37
1467868692	CO	2.3.1.41,2.3.1.85
1467868692	CO	2.3.1.61
1467868692	CO	2.3.1.85
1467868692	CO	2.3.1.85,2.3.1.41
1467868692	CO	2.3.1.85,2.3.1.86,2.3.1.41
1467868692	CO	2.3.1.86
1467868692	CO	2.3.1.88
1467868692	CO	2.3.1.97
1467868692	CO	2.3.3.10
1467868692	CO	2.7.1.24
1467868692	CO	3.1.2.2
1467868692	CO	3.1.2.2,2.3.3.13,3.1.2.4,3.1.2.23,3.1.2.1
1467868692	CO	3.1.2.27
1467868692	CO	4.1.99.5,4.1.99,6.2.1.3,2.3.1.65,2.3.1.176,6.2.1.7
1467868692	CO	6.2.1.24,6.2.1.3
1467868692	CO	6.2.1.3
1467868692	CO	6.2.1.4
1467868692	CO	6.2.1.5
1467911365	CMP-N-trimethyl-2-aminoethylphosphonate	2.7.7.15
1467911365	CMP-N-trimethyl-2-aminoethylphosphonate	2.7.8.2
1467911354	CMP-2-aminoethylphosphonate	2.7.7.14
1467911354	CMP-2-aminoethylphosphonate	2.7.8.1
1467911354	CMP-2-aminoethylphosphonate	2.7.8.1,2.7.8.-
1467866276	CMP	1.3.1.M12,2.7.8.3,2.7.8.2,2.7.8.22
1467866276	CMP	2.1.1.215
1467866276	CMP	2.7.8.1
1467866276	CMP	2.7.8.1,2.7.8.-
1467866276	CMP	2.7.8.11
1467866276	CMP	2.7.8.2
1467866276	CMP	2.7.8.41,2.7.8.5,2.4.99.3
1467866276	CMP	2.7.8.5
1467866276	CMP	2.7.8.5,2.7.8.8
1467866276	CMP	3.1.11.2
1467866276	CMP	3.1.4.17
1467866276	CMP	6.3.2.5
1468152888	clopidogrel	3.1.1.1
1467879788	Cl-	1.11.1.21,1.11.1.7,3.8.1.1
1467879788	Cl-	1.11.1.7
1467879788	Cl-	1.11.2.2,1.11.1.7
1467879788	Cl-	2.5.1.18
[truncated: 1,532 more rows]
