# Supplementary material for: NICEdrug.ch, a workflow for rational drug design and systems-level analysis of drug metabolism
Source: eLife. 2021 Aug 3;10:e65543. doi: 10.7554/eLife.65543 (PMC8331181; doi:10.7554/eLife.65543)
Supplement: Supplementary file 7. — (A) Hijacked human proteins by SARS-CoV-2 as identified by Gordon et al., 2020 with an annotated enzymatic function (EC number), also called here ‘SARS-CoV-2 hijacked enzymes’. (B) NICEdrug druggability report for SARS-CoV-2 hijacked enzymes including all NICEdrug small molecules. (C) Best candidate drugs against COVID-19: NICEdrug druggability report for SARS-CoV-2 hijacked enzymes including drugs with NICEdrug score above 0.5 compared to the native human substrate. (D) Summary of NICEdrug best candidate drugs against COVID-19 and their classification according to the drug category in the KEGG database. (E) NICEdrug druggability report of SARS-CoV-2 hijacked enzymes including prodrugs (up to three steps away of any NICEdrug small molecule) with NICEdrug score above 0.5 compared to the native human substrate. (F) Best candidate food-based molecules against COVID-19: NICEdrug druggability report of SARS-CoV-2 hijacked enzymes including food-based molecules with NICEdrug score above 0.5 compared to the native human substrate. (G) Summary of the NICEdrug best candidate food-based molecules against COVID-19 and their classification according to the fooDB source. [file elife-65543-supp7.xlsx]

## Sheet: summary
Tab in Supplementary_File_7	Description of each tab/section in Supplementary_File_7, related to Figure 7
S7.1	Hijacked human proteins by SARS-CoV-2 (as identified by Gordon et. Al) with an annotated enzymatic function (E.C. number), also called here "SARS-CoV-2 hijacked enzymes"
S7.2	NICEdrug druggability report for SARS-CoV-2 hijacked enzymes including all NICEdrug small molecules
S7.3	Best candidate drugs against COVID-19: NICEdrug druggability report for SARS-CoV-2 hijacked enzymes including drugs with NICEdrug score above 0.5 compared to the native human substrate (subset of Table S7.2)
S7.4	Summary of NICEdrug best candidate drugs against COVID-19 and their classification according to the drug category in the KEGG database
S7.5	NICEdrug druggability report of SARS-CoV-2 hijacked enzymes including prodrugs (up to three steps away of any NICEdrug small molecule) with NICEdrug score above 0.5 compared to the native human substrate
S7.6	Best candidate food-based molecules against COVID-19: NICEdrug druggability report of SARS-CoV-2 hijacked enzymes including food-based molecules with NICEdrug score above 0.5 compared to the native human substrate
S7.7	Summary of the NICEdrug best candidate food-based molecules against COVID-19 and their classification according to the fooDB source

## Sheet: S7.1
SARS-CoV-2-hijacked human protein ID	Human gene name	Status in uniprot	EC number	SARS-CoV-2 protein name interacting with hijacked human protein
O75439	MPPB_HUMAN	reviewed	3.4.24.64	SARS-CoV2 M
P11310	ACADM_HUMAN	reviewed	1.3.8.7	SARS-CoV2 M
P38435	VKGC_HUMAN	reviewed	4.1.1.90	SARS-CoV2 M
Q5JRX3	PREP_HUMAN	reviewed	3.4.24.-	SARS-CoV2 M
Q9BW92	SYTM_HUMAN	reviewed	6.1.1.3	SARS-CoV2 M
Q9UDR5	AASS_HUMAN	reviewed	1.5.1.8	SARS-CoV2 M
Q9UDR5	AASS_HUMAN	reviewed	1.5.1.9	SARS-CoV2 M
P19784	CSK22_HUMAN	reviewed	2.7.11.1	SARS-CoV2 N
Q13283	G3BP1_HUMAN	reviewed	3.6.4.12	SARS-CoV2 N
Q13283	G3BP1_HUMAN	reviewed	3.6.4.13	SARS-CoV2 N
Q92900	RENT1_HUMAN	reviewed	3.6.4.-	SARS-CoV2 N
Q9HCE1	MOV10_HUMAN	reviewed	3.6.4.13	SARS-CoV2 N
Q9NR30	DDX21_HUMAN	reviewed	3.6.4.13	SARS-CoV2 N
P09884	DPOLA_HUMAN	reviewed	2.7.7.7	SARS-CoV2 nsp1
P49642	PRI1_HUMAN	reviewed	2.7.7.-	SARS-CoV2 nsp1
Q8NBJ5	GT251_HUMAN	reviewed	2.4.1.50	SARS-CoV2 nsp1
P55789	ALR_HUMAN	reviewed	1.8.3.2	SARS-CoV2 nsp10
O14874	BCKD_HUMAN	reviewed	2.7.11.4	SARS-CoV2 nsp12
O75592	MYCB2_HUMAN	reviewed	2.3.2.-	SARS-CoV2 nsp12
Q13546	RIPK1_HUMAN	reviewed	2.7.11.1	SARS-CoV2 nsp12
Q2T9J0	TYSD1_HUMAN	reviewed	3.4.21.-	SARS-CoV2 nsp12
Q9H2H8	PPIL3_HUMAN	reviewed	5.2.1.8	SARS-CoV2 nsp12
O14578	CTRO_HUMAN	reviewed	2.7.11.1	SARS-CoV2 nsp13
P17612	KAPCA_HUMAN	reviewed	2.7.11.11	SARS-CoV2 nsp13
Q92995	UBP13_HUMAN	reviewed	3.4.19.12	SARS-CoV2 nsp13
Q9UHD2	TBK1_HUMAN	reviewed	2.7.11.1	SARS-CoV2 nsp13
P06280	AGAL_HUMAN	reviewed	3.2.1.22	SARS-CoV2 nsp14
P12268	IMDH2_HUMAN	reviewed	1.1.1.205	SARS-CoV2 nsp14
Q9NXA8	SIR5_HUMAN	reviewed	2.3.1.-	SARS-CoV2 nsp14
Q9H4P4	RNF41_HUMAN	reviewed	2.3.2.27	SARS-CoV2 nsp15
O14975	S27A2_HUMAN	reviewed	6.2.1.-	SARS-CoV2 nsp2
O14975	S27A2_HUMAN	reviewed	6.2.1.15	SARS-CoV2 nsp2
O14975	S27A2_HUMAN	reviewed	6.2.1.3	SARS-CoV2 nsp2
O14975	S27A2_HUMAN	reviewed	6.2.1.24	SARS-CoV2 nsp2
O14975	S27A2_HUMAN	reviewed	6.2.1.7	SARS-CoV2 nsp2
P16435	NCPR_HUMAN	reviewed	1.6.2.4	SARS-CoV2 nsp2
P14735	IDE_HUMAN	reviewed	3.4.24.56	SARS-CoV2 nsp4
Q2TAA5	ALG11_HUMAN	reviewed	2.4.1.131	SARS-CoV2 nsp4
Q92769	HDAC2_HUMAN	reviewed	3.5.1.98	SARS-CoV2 nsp5
P07203	GPX1_HUMAN	reviewed	1.11.1.9	SARS-CoV2 nsp5_C145A
Q9NXH9	TRM1_HUMAN	reviewed	2.1.1.216	SARS-CoV2 nsp5_C145A
O00116	ADAS_HUMAN	reviewed	2.5.1.26	SARS-CoV2 nsp7
O95573	ACSL3_HUMAN	reviewed	6.2.1.3	SARS-CoV2 nsp7
O95573	ACSL3_HUMAN	reviewed	6.2.1.15	SARS-CoV2 nsp7
P00387	NB5R3_HUMAN	reviewed	1.6.2.2	SARS-CoV2 nsp7
P21964	COMT_HUMAN	reviewed	2.1.1.6	SARS-CoV2 nsp7
P61026	RAB10_HUMAN	reviewed	3.6.5.2	SARS-CoV2 nsp7
P61586	RHOA_HUMAN	reviewed	3.6.5.2	SARS-CoV2 nsp7
Q13724	MOGS_HUMAN	reviewed	3.2.1.106	SARS-CoV2 nsp7
Q5VT66	MARC1_HUMAN	reviewed	1.7.-.-	SARS-CoV2 nsp7
Q6ZRP7	QSOX2_HUMAN	reviewed	1.8.3.2	SARS-CoV2 nsp7
Q7LGA3	HS2ST_HUMAN	reviewed	2.8.2.-	SARS-CoV2 nsp7
Q8WUY8	NAT14_HUMAN	reviewed	2.3.1.-	SARS-CoV2 nsp7
Q9H7Z7	PGES2_HUMAN	reviewed	5.3.99.3	SARS-CoV2 nsp7
O95260	ATE1_HUMAN	reviewed	2.3.2.8	SARS-CoV2 nsp8
O96028	NSD2_HUMAN	reviewed	2.1.1.356	SARS-CoV2 nsp8
Q13206	DDX10_HUMAN	reviewed	3.6.4.13	SARS-CoV2 nsp8
Q7L2J0	MEPCE_HUMAN	reviewed	2.1.1.-	SARS-CoV2 nsp8
Q96I59	SYNM_HUMAN	reviewed	6.1.1.22	SARS-CoV2 nsp8
Q9HD40	SPCS_HUMAN	reviewed	2.9.1.2	SARS-CoV2 nsp8
Q9ULT8	HECD1_HUMAN	reviewed	2.3.2.26	SARS-CoV2 nsp8
P13984	T2FB_HUMAN	reviewed	3.6.4.12	SARS-CoV2 nsp9
Q86YT6	MIB1_HUMAN	reviewed	2.3.2.27	SARS-CoV2 nsp9
Q8TD19	NEK9_HUMAN	reviewed	2.7.11.1	SARS-CoV2 nsp9
P50897	PPT1_HUMAN	reviewed	3.1.2.22	SARS-CoV2 orf10
P62877	RBX1_HUMAN	reviewed	2.3.2.27	SARS-CoV2 orf10
P62877	RBX1_HUMAN	reviewed	2.3.2.32	SARS-CoV2 orf10
Q9BU02	THTPA_HUMAN	reviewed	3.6.1.28	SARS-CoV2 orf10
P09601	HMOX1_HUMAN	reviewed	1.14.14.18	SARS-CoV2 orf3a
Q9Y673	ALG5_HUMAN	reviewed	2.4.1.117	SARS-CoV2 orf3a
P52948	NUP98_HUMAN	reviewed	3.4.21.-	SARS-CoV2 orf6
O00469	PLOD2_HUMAN	reviewed	1.14.11.4	SARS-CoV2 orf8
O14656	TOR1A_HUMAN	reviewed	3.6.4.-	SARS-CoV2 orf8
P00750	TPA_HUMAN	reviewed	3.4.21.68	SARS-CoV2 orf8
P26358	DNMT1_HUMAN	reviewed	2.1.1.37	SARS-CoV2 orf8
P28300	LYOX_HUMAN	reviewed	1.4.3.13	SARS-CoV2 orf8
P29122	PCSK6_HUMAN	reviewed	3.4.21.-	SARS-CoV2 orf8
Q13443	ADAM9_HUMAN	reviewed	3.4.24.-	SARS-CoV2 orf8
Q6UW63	PLGT2_HUMAN	reviewed	2.4.1.-	SARS-CoV2 orf8
Q6UW63	PLGT2_HUMAN	reviewed	2.4.2.-	SARS-CoV2 orf8
Q7Z4H8	PLGT3_HUMAN	reviewed	2.4.1.-	SARS-CoV2 orf8
Q7Z4H8	PLGT3_HUMAN	reviewed	2.4.2.-	SARS-CoV2 orf8
Q86YB8	ERO1B_HUMAN	reviewed	1.8.4.-	SARS-CoV2 orf8
Q8IV08	PLD3_HUMAN	reviewed	3.1.16.1	SARS-CoV2 orf8
Q8IZ52	CHSS2_HUMAN	reviewed	2.4.1.175	SARS-CoV2 orf8
Q8IZ52	CHSS2_HUMAN	reviewed	2.4.1.226	SARS-CoV2 orf8
Q8N0Z8	PUSL1_HUMAN	reviewed	5.4.99.-	SARS-CoV2 orf8
Q92820	GGH_HUMAN	reviewed	3.4.19.9	SARS-CoV2 orf8
Q96AY3	FKB10_HUMAN	reviewed	5.2.1.8	SARS-CoV2 orf8
Q96IV0	NGLY1_HUMAN	reviewed	3.5.1.52	SARS-CoV2 orf8
Q96MM7	H6ST2_HUMAN	reviewed	2.8.2.-	SARS-CoV2 orf8
Q99519	NEUR1_HUMAN	reviewed	3.2.1.18	SARS-CoV2 orf8
Q9BZQ6	EDEM3_HUMAN	reviewed	3.2.1.113	SARS-CoV2 orf8
Q9H488	OFUT1_HUMAN	reviewed	2.4.1.221	SARS-CoV2 orf8
Q9NYU1	UGGG2_HUMAN	reviewed	2.4.1.-	SARS-CoV2 orf8
Q9P2E5	CHPF2_HUMAN	reviewed	2.4.1.226	SARS-CoV2 orf8
Q9UHI8	ATS1_HUMAN	reviewed	3.4.24.-	SARS-CoV2 orf8
Q9Y680	FKBP7_HUMAN	reviewed	5.2.1.8	SARS-CoV2 orf8
P27448	MARK3_HUMAN	reviewed	2.7.11.1	SARS-CoV2 orf9b
Q7KZI7	MARK2_HUMAN	reviewed	2.7.11.1	SARS-CoV2 orf9b
Q7KZI7	MARK2_HUMAN	reviewed	2.7.11.26	SARS-CoV2 orf9b
Q9H2P9	DPH5_HUMAN	reviewed	2.1.1.314	SARS-CoV2 orf9b
Q9H773	DCTP1_HUMAN	reviewed	3.6.1.12	SARS-CoV2 orf9b
Q9P0L2	MARK1_HUMAN	reviewed	2.7.11.1	SARS-CoV2 orf9b
Q9P0L2	MARK1_HUMAN	reviewed	2.7.11.26	SARS-CoV2 orf9b
Q2PZI1	D19L1_HUMAN	reviewed	2.4.1.-	SARS-CoV2 orf9c
Q96K12	FACR2_HUMAN	reviewed	1.2.1.84	SARS-CoV2 orf9c
Q9BVK2	ALG8_HUMAN	reviewed	2.4.1.265	SARS-CoV2 orf9c
Q9H845	ACAD9_HUMAN	reviewed	1.3.8.-	SARS-CoV2 orf9c
Q9C0B5	ZDHC5_HUMAN	reviewed	2.3.1.225	SARS-CoV2 Spike

## Sheet: S7.2
SARS-CoV-2-hijacked human protein ID	Gene ID of protein	EC number linked to protein	Reaction NICEdrug ID	External ID reaction	BNICE.ch enzymatic rule in which protein participates	Name of native substrate of hijacked enzyme	Substrate NICEdrug ID	Substrate KEGG ID	Substrate SMILES	Name of small molecule sharing reactive site-centric similarity with native substrate (column G), or candidate drug	Similar molecule NICEdrug ID	Similar molecule KEGG ID	Similar molecule DrugBank ID	Similar molecule ChEMBL ID	Similar molecule fooDB	Similar molecule SMILES	NICEdrug score between substrate (column G) and small molecule sharing reactive site-centric similarity (column K)
O95573	ACSL3_HUMAN	6.2.1.3	1558028742	Metrxn:98855,rxn34755,HMR_2992|HMR_0401	6.2.1A2(rev)	gamma-Linolenoyl-CoA	1467893192	C03035	CCCCCC=CCC=CCC=CCCCCC(=O)SCCNC(=O)CCNC(=O)C(C(COP(=O)(OP(=O)(OCC1OC(C(C1OP(=O)(O)O)O)n1cnc2c1ncnc2N)O)O)(C)C)O	gamma-Linolenoyl-CoA	1467893192	C03035			FDB023905|	CCCCCC=CCC=CCC=CCCCCC(=O)SCCNC(=O)CCNC(=O)C(C(COP(=O)(OP(=O)(OCC1OC(C(C1OP(=O)(O)O)O)n1cnc2c1ncnc2N)O)O)(C)C)O	1
O95573	ACSL3_HUMAN	6.2.1.3	1558028742	Metrxn:98855,rxn34755,HMR_2992|HMR_0401	6.2.1A2(rev)	gamma-Linolenoyl-CoA	1467893192	C03035	CCCCCC=CCC=CCC=CCCCCC(=O)SCCNC(=O)CCNC(=O)C(C(COP(=O)(OP(=O)(OCC1OC(C(C1OP(=O)(O)O)O)n1cnc2c1ncnc2N)O)O)(C)C)O	2-Hydroxyglutaryl-CoA	1467893384	C03058				O=C(NCCSC(=O)C(CCC(=O)O)O)CCNC(=O)C(C(COP(=O)(OP(=O)(OCC1OC(C(C1OP(=O)(O)O)O)n1cnc2c1ncnc2N)O)O)(C)C)O	1
O95573	ACSL3_HUMAN	6.2.1.3	1558028742	Metrxn:98855,rxn34755,HMR_2992|HMR_0401	6.2.1A2(rev)	gamma-Linolenoyl-CoA	1467893192	C03035	CCCCCC=CCC=CCC=CCCCCC(=O)SCCNC(=O)CCNC(=O)C(C(COP(=O)(OP(=O)(OCC1OC(C(C1OP(=O)(O)O)O)n1cnc2c1ncnc2N)O)O)(C)C)O	3-Hydroxy-2-methylpropanoyl-CoA	1467900231	C04047,C06000			FDB022393|	OCC(C(=O)SCCNC(=O)CCNC(=O)C(C(COP(=O)(OP(=O)(OCC1OC(C(C1OP(=O)(O)O)O)n1cnc2c1ncnc2N)O)O)(C)C)O)C	1
O95573	ACSL3_HUMAN	6.2.1.3	1558028742	Metrxn:98855,rxn34755,HMR_2992|HMR_0401	6.2.1A2(rev)	gamma-Linolenoyl-CoA	1467893192	C03035	CCCCCC=CCC=CCC=CCCCCC(=O)SCCNC(=O)CCNC(=O)C(C(COP(=O)(OP(=O)(OCC1OC(C(C1OP(=O)(O)O)O)n1cnc2c1ncnc2N)O)O)(C)C)O	(1-Hydroxycyclohexan-1-yl)acetyl-CoA	1467902183	C04316				O=C(NCCSC(=O)CC1(O)CCCCC1)CCNC(=O)C(C(COP(=O)(OP(=O)(OCC1OC(C(C1OP(=O)(O)O)O)n1cnc2c1ncnc2N)O)O)(C)C)O	1
O95573	ACSL3_HUMAN	6.2.1.3	1558028742	Metrxn:98855,rxn34755,HMR_2992|HMR_0401	6.2.1A2(rev)	gamma-Linolenoyl-CoA	1467893192	C03035	CCCCCC=CCC=CCC=CCCCCC(=O)SCCNC(=O)CCNC(=O)C(C(COP(=O)(OP(=O)(OCC1OC(C(C1OP(=O)(O)O)O)n1cnc2c1ncnc2N)O)O)(C)C)O	L-Malyl-CoA	1467902381	C04348,C20747			FDB022374|	O=C(NCCSC(=O)CC(C(=O)O)O)CCNC(=O)C(C(COP(=O)(OP(=O)(OCC1OC(C(C1OP(=O)(O)O)O)n1cnc2c1ncnc2N)O)O)(C)C)O	1
O95573	ACSL3_HUMAN	6.2.1.3	1558028742	Metrxn:98855,rxn34755,HMR_2992|HMR_0401	6.2.1A2(rev)	gamma-Linolenoyl-CoA	1467893192	C03035	CCCCCC=CCC=CCC=CCCCCC(=O)SCCNC(=O)CCNC(=O)C(C(COP(=O)(OP(=O)(OCC1OC(C(C1OP(=O)(O)O)O)n1cnc2c1ncnc2N)O)O)(C)C)O	(S)-3-Hydroxyhexadecanoyl-CoA	1467907975	C05258			FDB023251|	CCCCCCCCCCCCCC(CC(=O)SCCNC(=O)CCNC(=O)C(C(COP(=O)(OP(=O)(OCC1OC(C(C1OP(=O)(O)O)O)n1cnc2c1ncnc2N)O)O)(C)C)O)O	1
O95573	ACSL3_HUMAN	6.2.1.3	1558028742	Metrxn:98855,rxn34755,HMR_2992|HMR_0401	6.2.1A2(rev)	gamma-Linolenoyl-CoA	1467893192	C03035	CCCCCC=CCC=CCC=CCCCCC(=O)SCCNC(=O)CCNC(=O)C(C(COP(=O)(OP(=O)(OCC1OC(C(C1OP(=O)(O)O)O)n1cnc2c1ncnc2N)O)O)(C)C)O	3-Oxopalmitoyl-CoA	1467907985	C05259			FDB023908|	CCCCCCCCCCCCCC(=O)CC(=O)SCCNC(=O)CCNC(=O)C(C(COP(=O)(OP(=O)(OCC1OC(C(C1OP(=O)(O)O)O)n1cnc2c1ncnc2N)O)O)(C)C)O	1
O95573	ACSL3_HUMAN	6.2.1.3	1558028742	Metrxn:98855,rxn34755,HMR_2992|HMR_0401	6.2.1A2(rev)	gamma-Linolenoyl-CoA	1467893192	C03035	CCCCCC=CCC=CCC=CCCCCC(=O)SCCNC(=O)CCNC(=O)C(C(COP(=O)(OP(=O)(OCC1OC(C(C1OP(=O)(O)O)O)n1cnc2c1ncnc2N)O)O)(C)C)O	(S)-3-Hydroxytetradecanoyl-CoA	1467907997	C05260			FDB023253|	CCCCCCCCCCCC(CC(=O)SCCNC(=O)CCNC(=O)C(C(COP(=O)(OP(=O)(OCC1OC(C(C1OP(=O)(O)O)O)n1cnc2c1ncnc2N)O)O)(C)C)O)O	1
O95573	ACSL3_HUMAN	6.2.1.3	1558028742	Metrxn:98855,rxn34755,HMR_2992|HMR_0401	6.2.1A2(rev)	gamma-Linolenoyl-CoA	1467893192	C03035	CCCCCC=CCC=CCC=CCCCCC(=O)SCCNC(=O)CCNC(=O)C(C(COP(=O)(OP(=O)(OCC1OC(C(C1OP(=O)(O)O)O)n1cnc2c1ncnc2N)O)O)(C)C)O	3-Oxotetradecanoyl-CoA	1467908007	C05261			FDB023254|	CCCCCCCCCCCC(=O)CC(=O)SCCNC(=O)CCNC(=O)C(C(COP(=O)(OP(=O)(OCC1OC(C(C1OP(=O)(O)O)O)n1cnc2c1ncnc2N)O)O)(C)C)O	1
O95573	ACSL3_HUMAN	6.2.1.3	1558028742	Metrxn:98855,rxn34755,HMR_2992|HMR_0401	6.2.1A2(rev)	gamma-Linolenoyl-CoA	1467893192	C03035	CCCCCC=CCC=CCC=CCCCCC(=O)SCCNC(=O)CCNC(=O)C(C(COP(=O)(OP(=O)(OCC1OC(C(C1OP(=O)(O)O)O)n1cnc2c1ncnc2N)O)O)(C)C)O	(S)-3-Hydroxydodecanoyl-CoA	1467908016	C05262			FDB023255|	CCCCCCCCCC(CC(=O)SCCNC(=O)CCNC(=O)C(C(COP(=O)(OP(=O)(OCC1OC(C(C1OP(=O)(O)O)O)n1cnc2c1ncnc2N)O)O)(C)C)O)O	1
O95573	ACSL3_HUMAN	6.2.1.3	1558028742	Metrxn:98855,rxn34755,HMR_2992|HMR_0401	6.2.1A2(rev)	gamma-Linolenoyl-CoA	1467893192	C03035	CCCCCC=CCC=CCC=CCCCCC(=O)SCCNC(=O)CCNC(=O)C(C(COP(=O)(OP(=O)(OCC1OC(C(C1OP(=O)(O)O)O)n1cnc2c1ncnc2N)O)O)(C)C)O	3-Oxododecanoyl-CoA	1467908027	C05263			FDB023256|	CCCCCCCCCC(=O)CC(=O)SCCNC(=O)CCNC(=O)C(C(COP(=O)(OP(=O)(OCC1OC(C(C1OP(=O)(O)O)O)n1cnc2c1ncnc2N)O)O)(C)C)O	1
O95573	ACSL3_HUMAN	6.2.1.3	1558028742	Metrxn:98855,rxn34755,HMR_2992|HMR_0401	6.2.1A2(rev)	gamma-Linolenoyl-CoA	1467893192	C03035	CCCCCC=CCC=CCC=CCCCCC(=O)SCCNC(=O)CCNC(=O)C(C(COP(=O)(OP(=O)(OCC1OC(C(C1OP(=O)(O)O)O)n1cnc2c1ncnc2N)O)O)(C)C)O	(S)-Hydroxydecanoyl-CoA	1467908038	C05264			FDB023257|	CCCCCCCC(CC(=O)SCCNC(=O)CCNC(=O)C(C(COP(=O)(OP(=O)(OCC1OC(C(C1OP(=O)(O)O)O)n1cnc2c1ncnc2N)O)O)(C)C)O)O	1
O95573	ACSL3_HUMAN	6.2.1.3	1558028742	Metrxn:98855,rxn34755,HMR_2992|HMR_0401	6.2.1A2(rev)	gamma-Linolenoyl-CoA	1467893192	C03035	CCCCCC=CCC=CCC=CCCCCC(=O)SCCNC(=O)CCNC(=O)C(C(COP(=O)(OP(=O)(OCC1OC(C(C1OP(=O)(O)O)O)n1cnc2c1ncnc2N)O)O)(C)C)O	(S)-3-Hydroxyoctanoyl-CoA	1467908062	C05266,C05278		CHEMBL251720	FDB023259|	CCCCCC(CC(=O)SCCNC(=O)CCNC(=O)C(C(COP(=O)(OP(=O)(OCC1OC(C(C1OP(=O)(O)O)O)n1cnc2c1ncnc2N)O)O)(C)C)O)O	1
O95573	ACSL3_HUMAN	6.2.1.3	1558028742	Metrxn:98855,rxn34755,HMR_2992|HMR_0401	6.2.1A2(rev)	gamma-Linolenoyl-CoA	1467893192	C03035	CCCCCC=CCC=CCC=CCCCCC(=O)SCCNC(=O)CCNC(=O)C(C(COP(=O)(OP(=O)(OCC1OC(C(C1OP(=O)(O)O)O)n1cnc2c1ncnc2N)O)O)(C)C)O	3-Oxooctanoyl-CoA	1467908075	C05267			FDB023260|	CCCCCC(=O)CC(=O)SCCNC(=O)CCNC(=O)C(C(COP(=O)(OP(=O)(OCC1OC(C(C1OP(=O)(O)O)O)n1cnc2c1ncnc2N)O)O)(C)C)O	1
O95573	ACSL3_HUMAN	6.2.1.3	1558028742	Metrxn:98855,rxn34755,HMR_2992|HMR_0401	6.2.1A2(rev)	gamma-Linolenoyl-CoA	1467893192	C03035	CCCCCC=CCC=CCC=CCCCCC(=O)SCCNC(=O)CCNC(=O)C(C(COP(=O)(OP(=O)(OCC1OC(C(C1OP(=O)(O)O)O)n1cnc2c1ncnc2N)O)O)(C)C)O	(S)-Hydroxyhexanoyl-CoA	1467908086	C05268			FDB023261|	CCCC(CC(=O)SCCNC(=O)CCNC(=O)C(C(COP(=O)(OP(=O)(OCC1OC(C(C1OP(=O)(O)O)O)n1cnc2c1ncnc2N)O)O)(C)C)O)O	1
O95573	ACSL3_HUMAN	6.2.1.3	1558028742	Metrxn:98855,rxn34755,HMR_2992|HMR_0401	6.2.1A2(rev)	gamma-Linolenoyl-CoA	1467893192	C03035	CCCCCC=CCC=CCC=CCCCCC(=O)SCCNC(=O)CCNC(=O)C(C(COP(=O)(OP(=O)(OCC1OC(C(C1OP(=O)(O)O)O)n1cnc2c1ncnc2N)O)O)(C)C)O	3-Methylcrotonyl-CoA	1467893475	C03069			FDB022652|Abalone; Abiyuch; Acerola; Acorn; Adzuki bean; Agar; Agave; Alaska blueberry; Alaska wild rhubarb; Alfalfa; Allium (Onion); Allspice; Almond; Alpine sweetvetch; Amaranth; American butterfish; American cranberry; American pokeweed; Angelica; Anise; Annual wild rice; Apple; Apricot; Arctic blackberry; Arrowhead; Arrowroot; Asian pear; Asparagus; Atlantic herring; Avocado; Babassu palm; Ba…	O=C(NCCSC(=O)C=C(C)C)CCNC(=O)C(C(COP(=O)(OP(=O)(OCC1OC(C(C1OP(=O)(O)O)O)n1cnc2c1ncnc2N)O)O)(C)C)O	1
O95573	ACSL3_HUMAN	6.2.1.3	1558028742	Metrxn:98855,rxn34755,HMR_2992|HMR_0401	6.2.1A2(rev)	gamma-Linolenoyl-CoA	1467893192	C03035	CCCCCC=CCC=CCC=CCCCCC(=O)SCCNC(=O)CCNC(=O)C(C(COP(=O)(OP(=O)(OCC1OC(C(C1OP(=O)(O)O)O)n1cnc2c1ncnc2N)O)O)(C)C)O	2-trans-Dodecenoyl-CoA	1467894642	C03221			FDB023218|	CCCCCCCCCC=CC(=O)SCCNC(=O)CCNC(=O)C(C(COP(=O)(OP(=O)(OCC1OC(C(C1OP(=O)(O)O)O)n1cnc2c1ncnc2N)O)O)(C)C)O	1
O95573	ACSL3_HUMAN	6.2.1.3	1558028742	Metrxn:98855,rxn34755,HMR_2992|HMR_0401	6.2.1A2(rev)	gamma-Linolenoyl-CoA	1467893192	C03035	CCCCCC=CCC=CCC=CCCCCC(=O)SCCNC(=O)CCNC(=O)C(C(COP(=O)(OP(=O)(OCC1OC(C(C1OP(=O)(O)O)O)n1cnc2c1ncnc2N)O)O)(C)C)O	5-Hydroxypentanoyl-CoA	1467894785	C03237				OCCCCC(=O)SCCNC(=O)CCNC(=O)C(C(COP(=O)(OP(=O)(OCC1OC(C(C1OP(=O)(O)O)O)n1cnc2c1ncnc2N)O)O)(C)C)O	1
O95573	ACSL3_HUMAN	6.2.1.3	1558028742	Metrxn:98855,rxn34755,HMR_2992|HMR_0401	6.2.1A2(rev)	gamma-Linolenoyl-CoA	1467893192	C03035	CCCCCC=CCC=CCC=CCCCCC(=O)SCCNC(=O)CCNC(=O)C(C(COP(=O)(OP(=O)(OCC1OC(C(C1OP(=O)(O)O)O)n1cnc2c1ncnc2N)O)O)(C)C)O	2-Succinylbenzoyl-CoA	1467894138	C03160			FDB030478|Abalone; Abiyuch; Acerola; Acorn; Adzuki bean; Agar; Agave; Alaska blueberry; Alaska wild rhubarb; Alfalfa; Allium (Onion); Allspice; Almond; Alpine sweetvetch; Amaranth; American butterfish; American cranberry; American pokeweed; Angelica; Anise; Annual wild rice; Apple; Apricot; Arctic blackberry; Arrowhead; Arrowroot; Asian pear; Asparagus; Atlantic herring; Avocado; Babassu palm; Ba…	O=C(NCCSC(=O)CCC(=O)c1ccccc1C(=O)O)CCNC(=O)C(C(COP(=O)(OP(=O)(OCC1OC(C(C1OP(=O)(O)O)O)n1cnc2c1ncnc2N)O)O)(C)C)O	1
O95573	ACSL3_HUMAN	6.2.1.3	1558028742	Metrxn:98855,rxn34755,HMR_2992|HMR_0401	6.2.1A2(rev)	gamma-Linolenoyl-CoA	1467893192	C03035	CCCCCC=CCC=CCC=CCCCCC(=O)SCCNC(=O)CCNC(=O)C(C(COP(=O)(OP(=O)(OCC1OC(C(C1OP(=O)(O)O)O)n1cnc2c1ncnc2N)O)O)(C)C)O	2-Methylbut-2-enoyl-CoA	1467895469	C03345			FDB022819|	CC=C(C(=O)SCCNC(=O)CCNC(=O)C(C(COP(=O)(OP(=O)(OCC1OC(C(C1OP(=O)(O)O)O)n1cnc2c1ncnc2N)O)O)(C)C)O)C	1
O95573	ACSL3_HUMAN	6.2.1.3	1558028742	Metrxn:98855,rxn34755,HMR_2992|HMR_0401	6.2.1A2(rev)	gamma-Linolenoyl-CoA	1467893192	C03035	CCCCCC=CCC=CCC=CCCCCC(=O)SCCNC(=O)CCNC(=O)C(C(COP(=O)(OP(=O)(OCC1OC(C(C1OP(=O)(O)O)O)n1cnc2c1ncnc2N)O)O)(C)C)O	4-Acetamidobutanoyl-CoA	1467895565	C03357				O=C(NCCSC(=O)CCCNC(=O)C)CCNC(=O)C(C(COP(=O)(OP(=O)(OCC1OC(C(C1OP(=O)(O)O)O)n1cnc2c1ncnc2N)O)O)(C)C)O	1
O95573	ACSL3_HUMAN	6.2.1.3	1558028742	Metrxn:98855,rxn34755,HMR_2992|HMR_0401	6.2.1A2(rev)	gamma-Linolenoyl-CoA	1467893192	C03035	CCCCCC=CCC=CCC=CCCCCC(=O)SCCNC(=O)CCNC(=O)C(C(COP(=O)(OP(=O)(OCC1OC(C(C1OP(=O)(O)O)O)n1cnc2c1ncnc2N)O)O)(C)C)O	3-Methylglutaconyl-CoA	1467894732	C03231			FDB022396|Abalone; Abiyuch; Acerola; Acorn; Adzuki bean; Agar; Agave; Alaska blueberry; Alaska wild rhubarb; Alfalfa; Allium (Onion); Allspice; Almond; Alpine sweetvetch; Amaranth; American butterfish; American cranberry; American pokeweed; Angelica; Anise; Annual wild rice; Apple; Apricot; Arctic blackberry; Arrowhead; Arrowroot; Asian pear; Asparagus; Atlantic herring; Avocado; Babassu palm; Ba…	O=C(NCCSC(=O)C=C(CC(=O)O)C)CCNC(=O)C(C(COP(=O)(OP(=O)(OCC1OC(C(C1OP(=O)(O)O)O)n1cnc2c1ncnc2N)O)O)(C)C)O	1
O95573	ACSL3_HUMAN	6.2.1.3	1558028742	Metrxn:98855,rxn34755,HMR_2992|HMR_0401	6.2.1A2(rev)	gamma-Linolenoyl-CoA	1467893192	C03035	CCCCCC=CCC=CCC=CCCCCC(=O)SCCNC(=O)CCNC(=O)C(C(COP(=O)(OP(=O)(OCC1OC(C(C1OP(=O)(O)O)O)n1cnc2c1ncnc2N)O)O)(C)C)O	2-Methylprop-2-enoyl-CoA	1467896214	C03460		ChEMBLE_NTD	FDB022369|	O=C(NCCSC(=O)C(=C)C)CCNC(=O)C(C(COP(=O)(OP(=O)(OCC1OC(C(C1OP(=O)(O)O)O)n1cnc2c1ncnc2N)O)O)(C)C)O	1
O95573	ACSL3_HUMAN	6.2.1.3	1558028742	Metrxn:98855,rxn34755,HMR_2992|HMR_0401	6.2.1A2(rev)	gamma-Linolenoyl-CoA	1467893192	C03035	CCCCCC=CCC=CCC=CCCCCC(=O)SCCNC(=O)CCNC(=O)C(C(COP(=O)(OP(=O)(OCC1OC(C(C1OP(=O)(O)O)O)n1cnc2c1ncnc2N)O)O)(C)C)O	3-Methyl-vinylacetyl-CoA	1467896270	C03466				CC(=C)CC(=O)SCCNC(=O)CCNC(=O)C(C(COP(=O)(OP(=O)(OCC1OC(C(C1OP(=O)(O)O)O)n1cnc2c1ncnc2N)O)O)(C)C)O	1
O95573	ACSL3_HUMAN	6.2.1.3	1558028742	Metrxn:98855,rxn34755,HMR_2992|HMR_0401	6.2.1A2(rev)	gamma-Linolenoyl-CoA	1467893192	C03035	CCCCCC=CCC=CCC=CCCCCC(=O)SCCNC(=O)CCNC(=O)C(C(COP(=O)(OP(=O)(OCC1OC(C(C1OP(=O)(O)O)O)n1cnc2c1ncnc2N)O)O)(C)C)O	2-Methylacetoacetyl-CoA	1467895458	C03344			FDB022455|Abalone; Abiyuch; Acerola; Acorn; Adzuki bean; Agar; Agave; Alaska blueberry; Alaska wild rhubarb; Alfalfa; Allium (Onion); Allspice; Almond; Alpine sweetvetch; Amaranth; American butterfish; American cranberry; American pokeweed; Angelica; Anise; Annual wild rice; Apple; Apricot; Arctic blackberry; Arrowhead; Arrowroot; Asian pear; Asparagus; Atlantic herring; Avocado; Babassu palm; Ba…	O=C(NCCSC(=O)C(C(=O)C)C)CCNC(=O)C(C(COP(=O)(OP(=O)(OCC1OC(C(C1OP(=O)(O)O)O)n1cnc2c1ncnc2N)O)O)(C)C)O	1
O95573	ACSL3_HUMAN	6.2.1.3	1558028742	Metrxn:98855,rxn34755,HMR_2992|HMR_0401	6.2.1A2(rev)	gamma-Linolenoyl-CoA	1467893192	C03035	CCCCCC=CCC=CCC=CCCCCC(=O)SCCNC(=O)CCNC(=O)C(C(COP(=O)(OP(=O)(OCC1OC(C(C1OP(=O)(O)O)O)n1cnc2c1ncnc2N)O)O)(C)C)O	7-Methyl-3-oxooctanoyl-CoA	1467897801	C03685				CC(CCCC(=O)CC(=O)SCCNC(=O)CCNC(=O)C(C(COP(=O)(OP(=O)(OCC1OC(C(C1OP(=O)(O)O)O)n1cnc2c1ncnc2N)O)O)(C)C)O)C	1
O95573	ACSL3_HUMAN	6.2.1.3	1558028742	Metrxn:98855,rxn34755,HMR_2992|HMR_0401	6.2.1A2(rev)	gamma-Linolenoyl-CoA	1467893192	C03035	CCCCCC=CCC=CCC=CCCCCC(=O)SCCNC(=O)CCNC(=O)C(C(COP(=O)(OP(=O)(OCC1OC(C(C1OP(=O)(O)O)O)n1cnc2c1ncnc2N)O)O)(C)C)O	S-(5-Hydroxy-2-furoyl)-CoA	1467898038	C03724				O=C(NCCSC(=O)c1ccc(o1)O)CCNC(=O)C(C(COP(=O)(OP(=O)(OCC1OC(C(C1OP(=O)(O)O)O)n1cnc2c1ncnc2N)O)O)(C)C)O	1
O95573	ACSL3_HUMAN	6.2.1.3	1558028742	Metrxn:98855,rxn34755,HMR_2992|HMR_0401	6.2.1A2(rev)	gamma-Linolenoyl-CoA	1467893192	C03035	CCCCCC=CCC=CCC=CCCCCC(=O)SCCNC(=O)CCNC(=O)C(C(COP(=O)(OP(=O)(OCC1OC(C(C1OP(=O)(O)O)O)n1cnc2c1ncnc2N)O)O)(C)C)O	(2S,3S)-3-Hydroxy-2-methylbutanoyl-CoA	1467902742	C04405			FDB022575|Abalone; Abiyuch; Acerola; Acorn; Adzuki bean; Agar; Agave; Alaska blueberry; Alaska wild rhubarb; Alfalfa; Allium (Onion); Allspice; Almond; Alpine sweetvetch; Amaranth; American butterfish; American cranberry; American pokeweed; Angelica; Anise; Annual wild rice; Apple; Apricot; Arctic blackberry; Arrowhead; Arrowroot; Asian pear; Asparagus; Atlantic herring; Avocado; Babassu palm; Ba…	O=C(NCCSC(=O)C(C(O)C)C)CCNC(=O)C(C(COP(=O)(OP(=O)(OCC1OC(C(C1OP(=O)(O)O)O)n1cnc2c1ncnc2N)O)O)(C)C)O	1
O95573	ACSL3_HUMAN	6.2.1.3	1558028742	Metrxn:98855,rxn34755,HMR_2992|HMR_0401	6.2.1A2(rev)	gamma-Linolenoyl-CoA	1467893192	C03035	CCCCCC=CCC=CCC=CCCCCC(=O)SCCNC(=O)CCNC(=O)C(C(COP(=O)(OP(=O)(OCC1OC(C(C1OP(=O)(O)O)O)n1cnc2c1ncnc2N)O)O)(C)C)O	2-Amino-5-oxocyclohex-1-enecarbonyl-CoA	1467907482	C05165				O=C(NCCSC(=O)C1=C(N)CCC(=O)C1)CCNC(=O)C(C(COP(=O)(OP(=O)(OCC1OC(C(C1OP(=O)(O)O)O)n1cnc2c1ncnc2N)O)O)(C)C)O	1
O95573	ACSL3_HUMAN	6.2.1.3	1558028742	Metrxn:98855,rxn34755,HMR_2992|HMR_0401	6.2.1A2(rev)	gamma-Linolenoyl-CoA	1467893192	C03035	CCCCCC=CCC=CCC=CCCCCC(=O)SCCNC(=O)CCNC(=O)C(C(COP(=O)(OP(=O)(OCC1OC(C(C1OP(=O)(O)O)O)n1cnc2c1ncnc2N)O)O)(C)C)O	3-Hydroxybenzoyl-CoA	1467907657	C05195				O=C(NCCSC(=O)c1cccc(c1)O)CCNC(=O)C(C(COP(=O)(OP(=O)(OCC1OC(C(C1OP(=O)(O)O)O)n1cnc2c1ncnc2N)O)O)(C)C)O	1
O95573	ACSL3_HUMAN	6.2.1.3	1558028742	Metrxn:98855,rxn34755,HMR_2992|HMR_0401	6.2.1A2(rev)	gamma-Linolenoyl-CoA	1467893192	C03035	CCCCCC=CCC=CCC=CCCCCC(=O)SCCNC(=O)CCNC(=O)C(C(COP(=O)(OP(=O)(OCC1OC(C(C1OP(=O)(O)O)O)n1cnc2c1ncnc2N)O)O)(C)C)O	3-Oxodecanoyl-CoA	1467908051	C05265			FDB023258|Abalone; Abiyuch; Acerola; Acorn; Adzuki bean; Agar; Agave; Alaska blueberry; Alaska wild rhubarb; Alfalfa; Allium (Onion); Allspice; Almond; Alpine sweetvetch; Amaranth; American butterfish; American cranberry; American pokeweed; Angelica; Anise; Annual wild rice; Apple; Apricot; Arctic blackberry; Arrowhead; Arrowroot; Asian pear; Asparagus; Atlantic herring; Avocado; Babassu palm; Ba…	CCCCCCCC(=O)CC(=O)SCCNC(=O)CCNC(=O)C(C(COP(=O)(OP(=O)(OCC1OC(C(C1OP(=O)(O)O)O)n1cnc2c1ncnc2N)O)O)(C)C)O	1
O95573	ACSL3_HUMAN	6.2.1.3	1558028742	Metrxn:98855,rxn34755,HMR_2992|HMR_0401	6.2.1A2(rev)	gamma-Linolenoyl-CoA	1467893192	C03035	CCCCCC=CCC=CCC=CCCCCC(=O)SCCNC(=O)CCNC(=O)C(C(COP(=O)(OP(=O)(OCC1OC(C(C1OP(=O)(O)O)O)n1cnc2c1ncnc2N)O)O)(C)C)O	Hexanoyl-CoA	1467908112	C05270	DB02563,EXPT01799	CHEMBL1949895	FDB023074|	CCCCCC(=O)SCCNC(=O)CCNC(=O)C(C(COP(=O)(OP(=O)(OCC1OC(C(C1OP(=O)(O)O)O)n1cnc2c1ncnc2N)O)O)(C)C)O	1
O95573	ACSL3_HUMAN	6.2.1.3	1558028742	Metrxn:98855,rxn34755,HMR_2992|HMR_0401	6.2.1A2(rev)	gamma-Linolenoyl-CoA	1467893192	C03035	CCCCCC=CCC=CCC=CCCCCC(=O)SCCNC(=O)CCNC(=O)C(C(COP(=O)(OP(=O)(OCC1OC(C(C1OP(=O)(O)O)O)n1cnc2c1ncnc2N)O)O)(C)C)O	trans-Hex-2-enoyl-CoA	1467908124	C05271			FDB023263|	CCCC=CC(=O)SCCNC(=O)CCNC(=O)C(C(COP(=O)(OP(=O)(OCC1OC(C(C1OP(=O)(O)O)O)n1cnc2c1ncnc2N)O)O)(C)C)O	1
O95573	ACSL3_HUMAN	6.2.1.3	1558028742	Metrxn:98855,rxn34755,HMR_2992|HMR_0401	6.2.1A2(rev)	gamma-Linolenoyl-CoA	1467893192	C03035	CCCCCC=CCC=CCC=CCCCCC(=O)SCCNC(=O)CCNC(=O)C(C(COP(=O)(OP(=O)(OCC1OC(C(C1OP(=O)(O)O)O)n1cnc2c1ncnc2N)O)O)(C)C)O	3-Oxohexanoyl-CoA	1467908099	C05269			FDB023262|Abalone; Abiyuch; Acerola; Acorn; Adzuki bean; Agar; Agave; Alaska blueberry; Alaska wild rhubarb; Alfalfa; Allium (Onion); Allspice; Almond; Alpine sweetvetch; Amaranth; American butterfish; American cranberry; American pokeweed; Angelica; Anise; Annual wild rice; Apple; Apricot; Arctic blackberry; Arrowhead; Arrowroot; Asian pear; Asparagus; Atlantic herring; Avocado; Babassu palm; Ba…	CCCC(=O)CC(=O)SCCNC(=O)CCNC(=O)C(C(COP(=O)(OP(=O)(OCC1OC(C(C1OP(=O)(O)O)O)n1cnc2c1ncnc2N)O)O)(C)C)O	1
O95573	ACSL3_HUMAN	6.2.1.3	1558028742	Metrxn:98855,rxn34755,HMR_2992|HMR_0401	6.2.1A2(rev)	gamma-Linolenoyl-CoA	1467893192	C03035	CCCCCC=CCC=CCC=CCCCCC(=O)SCCNC(=O)CCNC(=O)C(C(COP(=O)(OP(=O)(OCC1OC(C(C1OP(=O)(O)O)O)n1cnc2c1ncnc2N)O)O)(C)C)O	trans-Hexadec-2-enoyl-CoA	1467908137	C05272			FDB023264|	CCCCCCCCCCCCCC=CC(=O)SCCNC(=O)CCNC(=O)C(C(COP(=O)(OP(=O)(OCC1OC(C(C1OP(=O)(O)O)O)n1cnc2c1ncnc2N)O)O)(C)C)O	1
O95573	ACSL3_HUMAN	6.2.1.3	1558028742	Metrxn:98855,rxn34755,HMR_2992|HMR_0401	6.2.1A2(rev)	gamma-Linolenoyl-CoA	1467893192	C03035	CCCCCC=CCC=CCC=CCCCCC(=O)SCCNC(=O)CCNC(=O)C(C(COP(=O)(OP(=O)(OCC1OC(C(C1OP(=O)(O)O)O)n1cnc2c1ncnc2N)O)O)(C)C)O	trans-Tetradec-2-enoyl-CoA	1467908150	C05273			FDB023265|	CCCCCCCCCCCC=CC(=O)SCCNC(=O)CCNC(=O)C(C(COP(=O)(OP(=O)(OCC1OC(C(C1OP(=O)(O)O)O)n1cnc2c1ncnc2N)O)O)(C)C)O	1
O95573	ACSL3_HUMAN	6.2.1.3	1558028742	Metrxn:98855,rxn34755,HMR_2992|HMR_0401	6.2.1A2(rev)	gamma-Linolenoyl-CoA	1467893192	C03035	CCCCCC=CCC=CCC=CCCCCC(=O)SCCNC(=O)CCNC(=O)C(C(COP(=O)(OP(=O)(OCC1OC(C(C1OP(=O)(O)O)O)n1cnc2c1ncnc2N)O)O)(C)C)O	Decanoyl-CoA	1467908162	C05274		CHEMBL1949897	FDB023910|	CCCCCCCCCC(=O)SCCNC(=O)CCNC(=O)C(C(COP(=O)(OP(=O)(OCC1OC(C(C1OP(=O)(O)O)O)n1cnc2c1ncnc2N)O)O)(C)C)O	1
O95573	ACSL3_HUMAN	6.2.1.3	1558028742	Metrxn:98855,rxn34755,HMR_2992|HMR_0401	6.2.1A2(rev)	gamma-Linolenoyl-CoA	1467893192	C03035	CCCCCC=CCC=CCC=CCCCCC(=O)SCCNC(=O)CCNC(=O)C(C(COP(=O)(OP(=O)(OCC1OC(C(C1OP(=O)(O)O)O)n1cnc2c1ncnc2N)O)O)(C)C)O	trans-Dec-2-enoyl-CoA	1467908174	C05275			FDB022536|	CCCCCCCC=CC(=O)SCCNC(=O)CCNC(=O)C(C(COP(=O)(OP(=O)(OCC1OC(C(C1OP(=O)(O)O)O)n1cnc2c1ncnc2N)O)O)(C)C)O	1
O95573	ACSL3_HUMAN	6.2.1.3	1558028742	Metrxn:98855,rxn34755,HMR_2992|HMR_0401	6.2.1A2(rev)	gamma-Linolenoyl-CoA	1467893192	C03035	CCCCCC=CCC=CCC=CCCCCC(=O)SCCNC(=O)CCNC(=O)C(C(COP(=O)(OP(=O)(OCC1OC(C(C1OP(=O)(O)O)O)n1cnc2c1ncnc2N)O)O)(C)C)O	Chenodeoxycholoyl-CoA	1467908690	C05337,C17689			FDB023880|	OC1CCC2(C(C1)CC(C1C2CCC2(C1CCC2C(CCC(=O)SCCNC(=O)CCNC(=O)C(C(COP(=O)(OP(=O)(OCC1OC(C(C1OP(=O)(O)O)O)n1cnc2c1ncnc2N)O)O)(C)C)O)C)C)O)C	1
O95573	ACSL3_HUMAN	6.2.1.3	1558028742	Metrxn:98855,rxn34755,HMR_2992|HMR_0401	6.2.1A2(rev)	gamma-Linolenoyl-CoA	1467893192	C03035	CCCCCC=CCC=CCC=CCCCCC(=O)SCCNC(=O)CCNC(=O)C(C(COP(=O)(OP(=O)(OCC1OC(C(C1OP(=O)(O)O)O)n1cnc2c1ncnc2N)O)O)(C)C)O	4-Hydroxyphenylacetyl-CoA	1467908701	C05338			FDB023275|	O=C(NCCSC(=O)Cc1ccc(cc1)O)CCNC(=O)C(C(COP(=O)(OP(=O)(OCC1OC(C(C1OP(=O)(O)O)O)n1cnc2c1ncnc2N)O)O)(C)C)O	1
O95573	ACSL3_HUMAN	6.2.1.3	1558028742	Metrxn:98855,rxn34755,HMR_2992|HMR_0401	6.2.1A2(rev)	gamma-Linolenoyl-CoA	1467893192	C03035	CCCCCC=CCC=CCC=CCCCCC(=O)SCCNC(=O)CCNC(=O)C(C(COP(=O)(OP(=O)(OCC1OC(C(C1OP(=O)(O)O)O)n1cnc2c1ncnc2N)O)O)(C)C)O	(24E)-3alpha,7alpha-Dihydroxy-5beta-cholest-24-enoyl-CoA	1467909570	C05447			FDB024142|	OC1CCC2(C(C1)CC(C1C2CCC2(C1CCC2C(CCC=C(C(=O)SCCNC(=O)CCNC(=O)C(C(COP(=O)(OP(=O)(OCC1OC(C(C1OP(=O)(O)O)O)n1cnc2c1ncnc2N)O)O)(C)C)O)C)C)C)O)C	1
O95573	ACSL3_HUMAN	6.2.1.3	1558028742	Metrxn:98855,rxn34755,HMR_2992|HMR_0401	6.2.1A2(rev)	gamma-Linolenoyl-CoA	1467893192	C03035	CCCCCC=CCC=CCC=CCCCCC(=O)SCCNC(=O)CCNC(=O)C(C(COP(=O)(OP(=O)(OCC1OC(C(C1OP(=O)(O)O)O)n1cnc2c1ncnc2N)O)O)(C)C)O	(24R,25R)-3alpha,7alpha,24-Trihydroxy-5beta-cholestanoyl-CoA	1467909581	C05448			FDB029072|	OC1CCC2(C(C1)CC(C1C2CCC2(C1CCC2C(CCC(C(C(=O)SCCNC(=O)CCNC(=O)C(C(COP(=O)(OP(=O)(OCC1OC(C(C1OP(=O)(O)O)O)n1cnc2c1ncnc2N)O)O)(C)C)O)C)O)C)C)O)C	1
O95573	ACSL3_HUMAN	6.2.1.3	1558028742	Metrxn:98855,rxn34755,HMR_2992|HMR_0401	6.2.1A2(rev)	gamma-Linolenoyl-CoA	1467893192	C03035	CCCCCC=CCC=CCC=CCCCCC(=O)SCCNC(=O)CCNC(=O)C(C(COP(=O)(OP(=O)(OCC1OC(C(C1OP(=O)(O)O)O)n1cnc2c1ncnc2N)O)O)(C)C)O	3alpha,7alpha-Dihydroxy-5beta-24-oxocholestanoyl-CoA	1467909591	C05449			FDB024143|	OC1CCC2(C(C1)CC(C1C2CCC2(C1CCC2C(CCC(=O)C(C(=O)SCCNC(=O)CCNC(=O)C(C(COP(=O)(OP(=O)(OCC1OC(C(C1OP(=O)(O)O)O)n1cnc2c1ncnc2N)O)O)(C)C)O)C)C)C)O)C	1
O95573	ACSL3_HUMAN	6.2.1.3	1558028742	Metrxn:98855,rxn34755,HMR_2992|HMR_0401	6.2.1A2(rev)	gamma-Linolenoyl-CoA	1467893192	C03035	CCCCCC=CCC=CCC=CCCCCC(=O)SCCNC(=O)CCNC(=O)C(C(COP(=O)(OP(=O)(OCC1OC(C(C1OP(=O)(O)O)O)n1cnc2c1ncnc2N)O)O)(C)C)O	3alpha,7alpha,12alpha,24-Tetrahydroxy-5beta-cholestanoyl-CoA	1467909602	C05450,C15614			FDB024137|	OC1CCC2(C(C1)CC(C1C2CC(O)C2(C1CCC2C(CCC(C(C(=O)SCCNC(=O)CCNC(=O)C(C(COP(=O)(OP(=O)(OCC1OC(C(C1OP(=O)(O)O)O)n1cnc2c1ncnc2N)O)O)(C)C)O)C)O)C)C)O)C	1
O95573	ACSL3_HUMAN	6.2.1.3	1558028742	Metrxn:98855,rxn34755,HMR_2992|HMR_0401	6.2.1A2(rev)	gamma-Linolenoyl-CoA	1467893192	C03035	CCCCCC=CCC=CCC=CCCCCC(=O)SCCNC(=O)CCNC(=O)C(C(COP(=O)(OP(=O)(OCC1OC(C(C1OP(=O)(O)O)O)n1cnc2c1ncnc2N)O)O)(C)C)O	(24E)-3alpha,7alpha,12alpha-Trihydroxy-5beta-cholest-24-enoyl-CoA	1467909692	C05460			FDB024136|	OC1CCC2(C(C1)CC(C1C2CC(O)C2(C1CCC2C(CCC=C(C(=O)SCCNC(=O)CCNC(=O)C(C(COP(=O)(OP(=O)(OCC1OC(C(C1OP(=O)(O)O)O)n1cnc2c1ncnc2N)O)O)(C)C)O)C)C)C)O)C	1
O95573	ACSL3_HUMAN	6.2.1.3	1558028742	Metrxn:98855,rxn34755,HMR_2992|HMR_0401	6.2.1A2(rev)	gamma-Linolenoyl-CoA	1467893192	C03035	CCCCCC=CCC=CCC=CCCCCC(=O)SCCNC(=O)CCNC(=O)C(C(COP(=O)(OP(=O)(OCC1OC(C(C1OP(=O)(O)O)O)n1cnc2c1ncnc2N)O)O)(C)C)O	3alpha,7alpha,12alpha-Trihydroxy-5beta-24-oxocholestanoyl-CoA	1467909761	C05467			FDB024138|	OC1CCC2(C(C1)CC(C1C2CC(O)C2(C1CCC2C(CCC(=O)C(C(=O)SCCNC(=O)CCNC(=O)C(C(COP(=O)(OP(=O)(OCC1OC(C(C1OP(=O)(O)O)O)n1cnc2c1ncnc2N)O)O)(C)C)O)C)C)C)O)C	1
O95573	ACSL3_HUMAN	6.2.1.3	1558028742	Metrxn:98855,rxn34755,HMR_2992|HMR_0401	6.2.1A2(rev)	gamma-Linolenoyl-CoA	1467893192	C03035	CCCCCC=CCC=CCC=CCCCCC(=O)SCCNC(=O)CCNC(=O)C(C(COP(=O)(OP(=O)(OCC1OC(C(C1OP(=O)(O)O)O)n1cnc2c1ncnc2N)O)O)(C)C)O	3-Hydroxypropionyl-CoA	1467911300	C05668			FDB024093|	OCCC(=O)SCCNC(=O)CCNC(=O)C(C(COP(=O)(OP(=O)(OCC1OC(C(C1OP(=O)(O)O)O)n1cnc2c1ncnc2N)O)O)(C)C)O	1
O95573	ACSL3_HUMAN	6.2.1.3	1558028742	Metrxn:98855,rxn34755,HMR_2992|HMR_0401	6.2.1A2(rev)	gamma-Linolenoyl-CoA	1467893192	C03035	CCCCCC=CCC=CCC=CCCCCC(=O)SCCNC(=O)CCNC(=O)C(C(COP(=O)(OP(=O)(OCC1OC(C(C1OP(=O)(O)O)O)n1cnc2c1ncnc2N)O)O)(C)C)O	3-Oxopropionyl-CoA	1467913988	C05989			FDB022882|	O=CCC(=O)SCCNC(=O)CCNC(=O)C(C(COP(=O)(OP(=O)(OCC1OC(C(C1OP(=O)(O)O)O)n1cnc2c1ncnc2N)O)O)(C)C)O	1
O95573	ACSL3_HUMAN	6.2.1.3	1558028742	Metrxn:98855,rxn34755,HMR_2992|HMR_0401	6.2.1A2(rev)	gamma-Linolenoyl-CoA	1467893192	C03035	CCCCCC=CCC=CCC=CCCCCC(=O)SCCNC(=O)CCNC(=O)C(C(COP(=O)(OP(=O)(OCC1OC(C(C1OP(=O)(O)O)O)n1cnc2c1ncnc2N)O)O)(C)C)O	3-Hydroxyisovaleryl-CoA	1467914056	C05998			FDB024126|	O=C(NCCSC(=O)CC(O)(C)C)CCNC(=O)C(C(COP(=O)(OP(=O)(OCC1OC(C(C1OP(=O)(O)O)O)n1cnc2c1ncnc2N)O)O)(C)C)O	1
O95573	ACSL3_HUMAN	6.2.1.3	1558028742	Metrxn:98855,rxn34755,HMR_2992|HMR_0401	6.2.1A2(rev)	gamma-Linolenoyl-CoA	1467893192	C03035	CCCCCC=CCC=CCC=CCCCCC(=O)SCCNC(=O)CCNC(=O)C(C(COP(=O)(OP(=O)(OCC1OC(C(C1OP(=O)(O)O)O)n1cnc2c1ncnc2N)O)O)(C)C)O	L-erythro-3-Methylmalyl-CoA	1467914287	C06027				O=C(NCCSC(=O)C(C(C(=O)O)O)C)CCNC(=O)C(C(COP(=O)(OP(=O)(OCC1OC(C(C1OP(=O)(O)O)O)n1cnc2c1ncnc2N)O)O)(C)C)O	1
O95573	ACSL3_HUMAN	6.2.1.3	1558028742	Metrxn:98855,rxn34755,HMR_2992|HMR_0401	6.2.1A2(rev)	gamma-Linolenoyl-CoA	1467893192	C03035	CCCCCC=CCC=CCC=CCCCCC(=O)SCCNC(=O)CCNC(=O)C(C(COP(=O)(OP(=O)(OCC1OC(C(C1OP(=O)(O)O)O)n1cnc2c1ncnc2N)O)O)(C)C)O	trans-Oct-2-enoyl-CoA	1467908186	C05276			FDB023268|Abalone; Abiyuch; Acerola; Acorn; Adzuki bean; Agar; Agave; Alaska blueberry; Alaska wild rhubarb; Alfalfa; Allium (Onion); Allspice; Almond; Alpine sweetvetch; Amaranth; American butterfish; American cranberry; American pokeweed; Angelica; Anise; Annual wild rice; Apple; Apricot; Arctic blackberry; Arrowhead; Arrowroot; Asian pear; Asparagus; Atlantic herring; Avocado; Babassu palm; Ba…	CCCCCC=CC(=O)SCCNC(=O)CCNC(=O)C(C(COP(=O)(OP(=O)(OCC1OC(C(C1OP(=O)(O)O)O)n1cnc2c1ncnc2N)O)O)(C)C)O	1
O95573	ACSL3_HUMAN	6.2.1.3	1558028742	Metrxn:98855,rxn34755,HMR_2992|HMR_0401	6.2.1A2(rev)	gamma-Linolenoyl-CoA	1467893192	C03035	CCCCCC=CCC=CCC=CCCCCC(=O)SCCNC(=O)CCNC(=O)C(C(COP(=O)(OP(=O)(OCC1OC(C(C1OP(=O)(O)O)O)n1cnc2c1ncnc2N)O)O)(C)C)O	trans,cis-Lauro-2,6-dienoyl-CoA	1467908207	C05279				CCCCCC=CCCC=CC(=O)SCCNC(=O)CCNC(=O)C(C(COP(=O)(OP(=O)(OCC1OC(C(C1OP(=O)(O)O)O)n1cnc2c1ncnc2N)O)O)(C)C)O	1
O95573	ACSL3_HUMAN	6.2.1.3	1558028742	Metrxn:98855,rxn34755,HMR_2992|HMR_0401	6.2.1A2(rev)	gamma-Linolenoyl-CoA	1467893192	C03035	CCCCCC=CCC=CCC=CCCCCC(=O)SCCNC(=O)CCNC(=O)C(C(COP(=O)(OP(=O)(OCC1OC(C(C1OP(=O)(O)O)O)n1cnc2c1ncnc2N)O)O)(C)C)O	cis,cis-3,6-Dodecadienoyl-CoA	1467908217	C05280			FDB023271|	CCCCCC=CCC=CCC(=O)SCCNC(=O)CCNC(=O)C(C(COP(=O)(OP(=O)(OCC1OC(C(C1OP(=O)(O)O)O)n1cnc2c1ncnc2N)O)O)(C)C)O	1
O95573	ACSL3_HUMAN	6.2.1.3	1558028742	Metrxn:98855,rxn34755,HMR_2992|HMR_0401	6.2.1A2(rev)	gamma-Linolenoyl-CoA	1467893192	C03035	CCCCCC=CCC=CCC=CCCCCC(=O)SCCNC(=O)CCNC(=O)C(C(COP(=O)(OP(=O)(OCC1OC(C(C1OP(=O)(O)O)O)n1cnc2c1ncnc2N)O)O)(C)C)O	2-Methylfumaryl-CoA	1467914300	C06028				O=C(NCCSC(=O)C(=CC(=O)O)C)CCNC(=O)C(C(COP(=O)(OP(=O)(OCC1OC(C(C1OP(=O)(O)O)O)n1cnc2c1ncnc2N)O)O)(C)C)O	1
O95573	ACSL3_HUMAN	6.2.1.3	1558028742	Metrxn:98855,rxn34755,HMR_2992|HMR_0401	6.2.1A2(rev)	gamma-Linolenoyl-CoA	1467893192	C03035	CCCCCC=CCC=CCC=CCCCCC(=O)SCCNC(=O)CCNC(=O)C(C(COP(=O)(OP(=O)(OCC1OC(C(C1OP(=O)(O)O)O)n1cnc2c1ncnc2N)O)O)(C)C)O	Cyclohexa-1,5-diene-1-carbonyl-CoA	1467916648	C06322			FDB028852|	O=C(NCCSC(=O)C1=CCCC=C1)CCNC(=O)C(C(COP(=O)(OP(=O)(OCC1OC(C(C1OP(=O)(O)O)O)n1cnc2c1ncnc2N)O)O)(C)C)O	1
O95573	ACSL3_HUMAN	6.2.1.3	1558028742	Metrxn:98855,rxn34755,HMR_2992|HMR_0401	6.2.1A2(rev)	gamma-Linolenoyl-CoA	1467893192	C03035	CCCCCC=CCC=CCC=CCCCCC(=O)SCCNC(=O)CCNC(=O)C(C(COP(=O)(OP(=O)(OCC1OC(C(C1OP(=O)(O)O)O)n1cnc2c1ncnc2N)O)O)(C)C)O	4-Chlorobenzoyl-CoA	1467917321	C06387				O=C(NCCSC(=O)c1ccc(cc1)Cl)CCNC(=O)C(C(COP(=O)(OP(=O)(OCC1OC(C(C1OP(=O)(O)O)O)n1cnc2c1ncnc2N)O)O)(C)C)O	1
O95573	ACSL3_HUMAN	6.2.1.3	1558028742	Metrxn:98855,rxn34755,HMR_2992|HMR_0401	6.2.1A2(rev)	gamma-Linolenoyl-CoA	1467893192	C03035	CCCCCC=CCC=CCC=CCCCCC(=O)SCCNC(=O)CCNC(=O)C(C(COP(=O)(OP(=O)(OCC1OC(C(C1OP(=O)(O)O)O)n1cnc2c1ncnc2N)O)O)(C)C)O	Malonamoyl-CoA	1467919717	C06625		ChEMBLE_NTD		O=C(NCCSC(=O)CC(=O)N)CCNC(=O)C(C(COP(=O)(OP(=O)(OCC1OC(C(C1OP(=O)(O)O)O)n1cnc2c1ncnc2N)O)O)(C)C)O	1
O95573	ACSL3_HUMAN	6.2.1.3	1558028742	Metrxn:98855,rxn34755,HMR_2992|HMR_0401	6.2.1A2(rev)	gamma-Linolenoyl-CoA	1467893192	C03035	CCCCCC=CCC=CCC=CCCCCC(=O)SCCNC(=O)CCNC(=O)C(C(COP(=O)(OP(=O)(OCC1OC(C(C1OP(=O)(O)O)O)n1cnc2c1ncnc2N)O)O)(C)C)O	2,4-Dichlorobenzoyl-CoA	1467920185	C06671				O=C(NCCSC(=O)c1ccc(cc1Cl)Cl)CCNC(=O)C(C(COP(=O)(OP(=O)(OCC1OC(C(C1OP(=O)(O)O)O)n1cnc2c1ncnc2N)O)O)(C)C)O	1
O95573	ACSL3_HUMAN	6.2.1.3	1558028742	Metrxn:98855,rxn34755,HMR_2992|HMR_0401	6.2.1A2(rev)	gamma-Linolenoyl-CoA	1467893192	C03035	CCCCCC=CCC=CCC=CCCCCC(=O)SCCNC(=O)CCNC(=O)C(C(COP(=O)(OP(=O)(OCC1OC(C(C1OP(=O)(O)O)O)n1cnc2c1ncnc2N)O)O)(C)C)O	3-Hydroxypimeloyl-CoA	1467920583	C06714			FDB028812|	OC(CC(=O)SCCNC(=O)CCNC(=O)C(C(COP(=O)(OP(=O)(OCC1OC(C(C1OP(=O)(O)O)O)n1cnc2c1ncnc2N)O)O)(C)C)O)CCCC(=O)O	1
O95573	ACSL3_HUMAN	6.2.1.3	1558028742	Metrxn:98855,rxn34755,HMR_2992|HMR_0401	6.2.1A2(rev)	gamma-Linolenoyl-CoA	1467893192	C03035	CCCCCC=CCC=CCC=CCCCCC(=O)SCCNC(=O)CCNC(=O)C(C(COP(=O)(OP(=O)(OCC1OC(C(C1OP(=O)(O)O)O)n1cnc2c1ncnc2N)O)O)(C)C)O	3-Oxopimeloyl-CoA	1467920593	C06715			FDB028814|	O=C(NCCSC(=O)CC(=O)CCCC(=O)O)CCNC(=O)C(C(COP(=O)(OP(=O)(OCC1OC(C(C1OP(=O)(O)O)O)n1cnc2c1ncnc2N)O)O)(C)C)O	1
O95573	ACSL3_HUMAN	6.2.1.3	1558028742	Metrxn:98855,rxn34755,HMR_2992|HMR_0401	6.2.1A2(rev)	gamma-Linolenoyl-CoA	1467893192	C03035	CCCCCC=CCC=CCC=CCCCCC(=O)SCCNC(=O)CCNC(=O)C(C(COP(=O)(OP(=O)(OCC1OC(C(C1OP(=O)(O)O)O)n1cnc2c1ncnc2N)O)O)(C)C)O	6-Carboxyhex-2-enoyl-CoA	1467920661	C06723				O=C(NCCSC(=O)C=CCCCC(=O)O)CCNC(=O)C(C(COP(=O)(OP(=O)(OCC1OC(C(C1OP(=O)(O)O)O)n1cnc2c1ncnc2N)O)O)(C)C)O	1
O95573	ACSL3_HUMAN	6.2.1.3	1558028742	Metrxn:98855,rxn34755,HMR_2992|HMR_0401	6.2.1A2(rev)	gamma-Linolenoyl-CoA	1467893192	C03035	CCCCCC=CCC=CCC=CCCCCC(=O)SCCNC(=O)CCNC(=O)C(C(COP(=O)(OP(=O)(OCC1OC(C(C1OP(=O)(O)O)O)n1cnc2c1ncnc2N)O)O)(C)C)O	(E)-11-Tetradecenoyl-CoA	1467920793	C06736,C06737				CCC=CCCCCCCCCCC(=O)SCCNC(=O)CCNC(=O)C(C(COP(=O)(OP(=O)(OCC1OC(C(C1OP(=O)(O)O)O)n1cnc2c1ncnc2N)O)O)(C)C)O	1
O95573	ACSL3_HUMAN	6.2.1.3	1558028742	Metrxn:98855,rxn34755,HMR_2992|HMR_0401	6.2.1A2(rev)	gamma-Linolenoyl-CoA	1467893192	C03035	CCCCCC=CCC=CCC=CCCCCC(=O)SCCNC(=O)CCNC(=O)C(C(COP(=O)(OP(=O)(OCC1OC(C(C1OP(=O)(O)O)O)n1cnc2c1ncnc2N)O)O)(C)C)O	6-Hydroxycyclohex-1-ene-1-carbonyl-CoA	1467920916	C06749			FDB028833|	O=C(NCCSC(=O)C1=CCCCC1O)CCNC(=O)C(C(COP(=O)(OP(=O)(OCC1OC(C(C1OP(=O)(O)O)O)n1cnc2c1ncnc2N)O)O)(C)C)O	1
O95573	ACSL3_HUMAN	6.2.1.3	1558028742	Metrxn:98855,rxn34755,HMR_2992|HMR_0401	6.2.1A2(rev)	gamma-Linolenoyl-CoA	1467893192	C03035	CCCCCC=CCC=CCC=CCCCCC(=O)SCCNC(=O)CCNC(=O)C(C(COP(=O)(OP(=O)(OCC1OC(C(C1OP(=O)(O)O)O)n1cnc2c1ncnc2N)O)O)(C)C)O	Benzoylacetyl-CoA	1467923954	C07118				O=C(NCCSC(=O)CC(=O)c1ccccc1)CCNC(=O)C(C(COP(=O)(OP(=O)(OCC1OC(C(C1OP(=O)(O)O)O)n1cnc2c1ncnc2N)O)O)(C)C)O	1
O95573	ACSL3_HUMAN	6.2.1.3	1558028742	Metrxn:98855,rxn34755,HMR_2992|HMR_0401	6.2.1A2(rev)	gamma-Linolenoyl-CoA	1467893192	C03035	CCCCCC=CCC=CCC=CCCCCC(=O)SCCNC(=O)CCNC(=O)C(C(COP(=O)(OP(=O)(OCC1OC(C(C1OP(=O)(O)O)O)n1cnc2c1ncnc2N)O)O)(C)C)O	[(1R)-2,2,3-Trimethyl-5-oxocyclopent-3-enyl]acetyl-CoA	1467924257	C07160				O=C(NCCSC(=O)CC1C(=O)C=C(C1(C)C)C)CCNC(=O)C(C(COP(=O)(OP(=O)(OCC1OC(C(C1OP(=O)(O)O)O)n1cnc2c1ncnc2N)O)O)(C)C)O	1
O95573	ACSL3_HUMAN	6.2.1.3	1558028742	Metrxn:98855,rxn34755,HMR_2992|HMR_0401	6.2.1A2(rev)	gamma-Linolenoyl-CoA	1467893192	C03035	CCCCCC=CCC=CCC=CCCCCC(=O)SCCNC(=O)CCNC(=O)C(C(COP(=O)(OP(=O)(OCC1OC(C(C1OP(=O)(O)O)O)n1cnc2c1ncnc2N)O)O)(C)C)O	3-Oxopristanoyl-CoA	1467925374	C07297			FDB022821|	CC(CCC(=O)C(C(=O)SCCNC(=O)CCNC(=O)C(C(COP(=O)(OP(=O)(OCC1OC(C(C1OP(=O)(O)O)O)n1cnc2c1ncnc2N)O)O)(C)C)O)C)CCCC(CCCC(C)C)C	1
O95573	ACSL3_HUMAN	6.2.1.3	1558028742	Metrxn:98855,rxn34755,HMR_2992|HMR_0401	6.2.1A2(rev)	gamma-Linolenoyl-CoA	1467893192	C03035	CCCCCC=CCC=CCC=CCCCCC(=O)SCCNC(=O)CCNC(=O)C(C(COP(=O)(OP(=O)(OCC1OC(C(C1OP(=O)(O)O)O)n1cnc2c1ncnc2N)O)O)(C)C)O	3-Hydroxy-3-(3-hydroxy-4-methoxyphenyl)propionyl-CoA	1467925403	C07302				COc1ccc(cc1O)C(CC(=O)SCCNC(=O)CCNC(=O)C(C(COP(=O)(OP(=O)(OCC1OC(C(C1OP(=O)(O)O)O)n1cnc2c1ncnc2N)O)O)(C)C)O)O	1
O95573	ACSL3_HUMAN	6.2.1.3	1558028742	Metrxn:98855,rxn34755,HMR_2992|HMR_0401	6.2.1A2(rev)	gamma-Linolenoyl-CoA	1467893192	C03035	CCCCCC=CCC=CCC=CCCCCC(=O)SCCNC(=O)CCNC(=O)C(C(COP(=O)(OP(=O)(OCC1OC(C(C1OP(=O)(O)O)O)n1cnc2c1ncnc2N)O)O)(C)C)O	4-Hydroxy-3-methoxyphenyl-beta-hydroxypropanoyl-CoA	1467925412	C07303				COc1cc(ccc1O)C(CC(=O)SCCNC(=O)CCNC(=O)C(C(COP(=O)(OP(=O)(OCC1OC(C(C1OP(=O)(O)O)O)n1cnc2c1ncnc2N)O)O)(C)C)O)O	1
O95573	ACSL3_HUMAN	6.2.1.3	1558028742	Metrxn:98855,rxn34755,HMR_2992|HMR_0401	6.2.1A2(rev)	gamma-Linolenoyl-CoA	1467893192	C03035	CCCCCC=CCC=CCC=CCCCCC(=O)SCCNC(=O)CCNC(=O)C(C(COP(=O)(OP(=O)(OCC1OC(C(C1OP(=O)(O)O)O)n1cnc2c1ncnc2N)O)O)(C)C)O	2-Hydroxyphytanoyl-CoA	1467925823	C07343			FDB022539|	CC(CCCC(CCCC(C)C)C)CCCC(C(C(=O)SCCNC(=O)CCNC(=O)C(C(COP(=O)(OP(=O)(OCC1OC(C(C1OP(=O)(O)O)O)n1cnc2c1ncnc2N)O)O)(C)C)O)O)C	1
O95573	ACSL3_HUMAN	6.2.1.3	1558028742	Metrxn:98855,rxn34755,HMR_2992|HMR_0401	6.2.1A2(rev)	gamma-Linolenoyl-CoA	1467893192	C03035	CCCCCC=CCC=CCC=CCCCCC(=O)SCCNC(=O)CCNC(=O)C(C(COP(=O)(OP(=O)(OCC1OC(C(C1OP(=O)(O)O)O)n1cnc2c1ncnc2N)O)O)(C)C)O	Thiophene-2-carbonyl-CoA	1467925861	C07347		ChEMBLE_NTD		O=C(NCCSC(=O)c1cccs1)CCNC(=O)C(C(COP(=O)(OP(=O)(OCC1OC(C(C1OP(=O)(O)O)O)n1cnc2c1ncnc2N)O)O)(C)C)O	1
O95573	ACSL3_HUMAN	6.2.1.3	1558028742	Metrxn:98855,rxn34755,HMR_2992|HMR_0401	6.2.1A2(rev)	gamma-Linolenoyl-CoA	1467893192	C03035	CCCCCC=CCC=CCC=CCCCCC(=O)SCCNC(=O)CCNC(=O)C(C(COP(=O)(OP(=O)(OCC1OC(C(C1OP(=O)(O)O)O)n1cnc2c1ncnc2N)O)O)(C)C)O	5-Hydroxythiophene-2-carbonyl-CoA	1467925870	C07348				O=C(NCCSC(=O)c1ccc(s1)O)CCNC(=O)C(C(COP(=O)(OP(=O)(OCC1OC(C(C1OP(=O)(O)O)O)n1cnc2c1ncnc2N)O)O)(C)C)O	1
O95573	ACSL3_HUMAN	6.2.1.3	1558028742	Metrxn:98855,rxn34755,HMR_2992|HMR_0401	6.2.1A2(rev)	gamma-Linolenoyl-CoA	1467893192	C03035	CCCCCC=CCC=CCC=CCCCCC(=O)SCCNC(=O)CCNC(=O)C(C(COP(=O)(OP(=O)(OCC1OC(C(C1OP(=O)(O)O)O)n1cnc2c1ncnc2N)O)O)(C)C)O	Cyclohex-2,5-diene-1-carboxyl-CoA	1467951433	C09809				O=C(NCCSC(=O)C1C=CCC=C1)CCNC(=O)C(C(COP(=O)(OP(=O)(OCC1OC(C(C1OP(=O)(O)O)O)n1cnc2c1ncnc2N)O)O)(C)C)O	1
O95573	ACSL3_HUMAN	6.2.1.3	1558028742	Metrxn:98855,rxn34755,HMR_2992|HMR_0401	6.2.1A2(rev)	gamma-Linolenoyl-CoA	1467893192	C03035	CCCCCC=CCC=CCC=CCCCCC(=O)SCCNC(=O)CCNC(=O)C(C(COP(=O)(OP(=O)(OCC1OC(C(C1OP(=O)(O)O)O)n1cnc2c1ncnc2N)O)O)(C)C)O	Cyclohex-1,4-diene-1-carboxyl-CoA	1467951442	C09810				O=C(NCCSC(=O)C1=CCC=CC1)CCNC(=O)C(C(COP(=O)(OP(=O)(OCC1OC(C(C1OP(=O)(O)O)O)n1cnc2c1ncnc2N)O)O)(C)C)O	1
O95573	ACSL3_HUMAN	6.2.1.3	1558028742	Metrxn:98855,rxn34755,HMR_2992|HMR_0401	6.2.1A2(rev)	gamma-Linolenoyl-CoA	1467893192	C03035	CCCCCC=CCC=CCC=CCCCCC(=O)SCCNC(=O)CCNC(=O)C(C(COP(=O)(OP(=O)(OCC1OC(C(C1OP(=O)(O)O)O)n1cnc2c1ncnc2N)O)O)(C)C)O	Cyclohex-1-ene-1-carboxyl-CoA	1467951451	C09811				O=C(NCCSC(=O)C1=CCCCC1)CCNC(=O)C(C(COP(=O)(OP(=O)(OCC1OC(C(C1OP(=O)(O)O)O)n1cnc2c1ncnc2N)O)O)(C)C)O	1
O95573	ACSL3_HUMAN	6.2.1.3	1558028742	Metrxn:98855,rxn34755,HMR_2992|HMR_0401	6.2.1A2(rev)	gamma-Linolenoyl-CoA	1467893192	C03035	CCCCCC=CCC=CCC=CCCCCC(=O)SCCNC(=O)CCNC(=O)C(C(COP(=O)(OP(=O)(OCC1OC(C(C1OP(=O)(O)O)O)n1cnc2c1ncnc2N)O)O)(C)C)O	2-Hydroxycyclohexane-1-carboxyl-CoA	1467951460	C09812				O=C(NCCSC(=O)C1CCCCC1O)CCNC(=O)C(C(COP(=O)(OP(=O)(OCC1OC(C(C1OP(=O)(O)O)O)n1cnc2c1ncnc2N)O)O)(C)C)O	1
O95573	ACSL3_HUMAN	6.2.1.3	1558028742	Metrxn:98855,rxn34755,HMR_2992|HMR_0401	6.2.1A2(rev)	gamma-Linolenoyl-CoA	1467893192	C03035	CCCCCC=CCC=CCC=CCCCCC(=O)SCCNC(=O)CCNC(=O)C(C(COP(=O)(OP(=O)(OCC1OC(C(C1OP(=O)(O)O)O)n1cnc2c1ncnc2N)O)O)(C)C)O	2-Ketocyclohexane-1-carboxyl-CoA	1467951469	C09813				O=C(NCCSC(=O)C1CCCCC1=O)CCNC(=O)C(C(COP(=O)(OP(=O)(OCC1OC(C(C1OP(=O)(O)O)O)n1cnc2c1ncnc2N)O)O)(C)C)O	1
O95573	ACSL3_HUMAN	6.2.1.3	1558028742	Metrxn:98855,rxn34755,HMR_2992|HMR_0401	6.2.1A2(rev)	gamma-Linolenoyl-CoA	1467893192	C03035	CCCCCC=CCC=CCC=CCCCCC(=O)SCCNC(=O)CCNC(=O)C(C(COP(=O)(OP(=O)(OCC1OC(C(C1OP(=O)(O)O)O)n1cnc2c1ncnc2N)O)O)(C)C)O	Benzylsuccinyl-CoA	1467951516	C09817				O=C(NCCSC(=O)C(Cc1ccccc1)CC(=O)O)CCNC(=O)C(C(COP(=O)(OP(=O)(OCC1OC(C(C1OP(=O)(O)O)O)n1cnc2c1ncnc2N)O)O)(C)C)O	1
O95573	ACSL3_HUMAN	6.2.1.3	1558028742	Metrxn:98855,rxn34755,HMR_2992|HMR_0401	6.2.1A2(rev)	gamma-Linolenoyl-CoA	1467893192	C03035	CCCCCC=CCC=CCC=CCCCCC(=O)SCCNC(=O)CCNC(=O)C(C(COP(=O)(OP(=O)(OCC1OC(C(C1OP(=O)(O)O)O)n1cnc2c1ncnc2N)O)O)(C)C)O	E-Phenylitaconyl-CoA	1467951526	C09818			FDB028867|	O=C(NCCSC(=O)C(=Cc1ccccc1)CC(=O)O)CCNC(=O)C(C(COP(=O)(OP(=O)(OCC1OC(C(C1OP(=O)(O)O)O)n1cnc2c1ncnc2N)O)O)(C)C)O	1
O95573	ACSL3_HUMAN	6.2.1.3	1558028742	Metrxn:98855,rxn34755,HMR_2992|HMR_0401	6.2.1A2(rev)	gamma-Linolenoyl-CoA	1467893192	C03035	CCCCCC=CCC=CCC=CCCCCC(=O)SCCNC(=O)CCNC(=O)C(C(COP(=O)(OP(=O)(OCC1OC(C(C1OP(=O)(O)O)O)n1cnc2c1ncnc2N)O)O)(C)C)O	(Hydroxymethylphenyl)succinyl-CoA	1467951536	C09819			FDB028802|	O=C(NCCSC(=O)C(C(c1ccccc1)O)CC(=O)O)CCNC(=O)C(C(COP(=O)(OP(=O)(OCC1OC(C(C1OP(=O)(O)O)O)n1cnc2c1ncnc2N)O)O)(C)C)O	1
O95573	ACSL3_HUMAN	6.2.1.3	1558028742	Metrxn:98855,rxn34755,HMR_2992|HMR_0401	6.2.1A2(rev)	gamma-Linolenoyl-CoA	1467893192	C03035	CCCCCC=CCC=CCC=CCCCCC(=O)SCCNC(=O)CCNC(=O)C(C(COP(=O)(OP(=O)(OCC1OC(C(C1OP(=O)(O)O)O)n1cnc2c1ncnc2N)O)O)(C)C)O	Benzoylsuccinyl-CoA	1467951545	C09820				O=C(NCCSC(=O)C(C(=O)c1ccccc1)CC(=O)O)CCNC(=O)C(C(COP(=O)(OP(=O)(OCC1OC(C(C1OP(=O)(O)O)O)n1cnc2c1ncnc2N)O)O)(C)C)O	1
O95573	ACSL3_HUMAN	6.2.1.3	1558028742	Metrxn:98855,rxn34755,HMR_2992|HMR_0401	6.2.1A2(rev)	gamma-Linolenoyl-CoA	1467893192	C03035	CCCCCC=CCC=CCC=CCCCCC(=O)SCCNC(=O)CCNC(=O)C(C(COP(=O)(OP(=O)(OCC1OC(C(C1OP(=O)(O)O)O)n1cnc2c1ncnc2N)O)O)(C)C)O	6-Oxocyclohex-1-ene-1-carbonyl-CoA	1467951555	C09821			FDB028834|	O=C(NCCSC(=O)C1=CCCCC1=O)CCNC(=O)C(C(COP(=O)(OP(=O)(OCC1OC(C(C1OP(=O)(O)O)O)n1cnc2c1ncnc2N)O)O)(C)C)O	1
O95573	ACSL3_HUMAN	6.2.1.3	1558028742	Metrxn:98855,rxn34755,HMR_2992|HMR_0401	6.2.1A2(rev)	gamma-Linolenoyl-CoA	1467893192	C03035	CCCCCC=CCC=CCC=CCCCCC(=O)SCCNC(=O)CCNC(=O)C(C(COP(=O)(OP(=O)(OCC1OC(C(C1OP(=O)(O)O)O)n1cnc2c1ncnc2N)O)O)(C)C)O	2,6-Dihydroxycyclohexane-1-carboxyl-CoA	1467951588	C09824				O=C(NCCSC(=O)C1C(O)CCCC1O)CCNC(=O)C(C(COP(=O)(OP(=O)(OCC1OC(C(C1OP(=O)(O)O)O)n1cnc2c1ncnc2N)O)O)(C)C)O	1
O95573	ACSL3_HUMAN	6.2.1.3	1558028742	Metrxn:98855,rxn34755,HMR_2992|HMR_0401	6.2.1A2(rev)	gamma-Linolenoyl-CoA	1467893192	C03035	CCCCCC=CCC=CCC=CCCCCC(=O)SCCNC(=O)CCNC(=O)C(C(COP(=O)(OP(=O)(OCC1OC(C(C1OP(=O)(O)O)O)n1cnc2c1ncnc2N)O)O)(C)C)O	2-Hydroxy-6-oxocyclohexane-1-carbonyl-CoA	1467951597	C09825				O=C(NCCSC(=O)C1C(O)CCCC1=O)CCNC(=O)C(C(COP(=O)(OP(=O)(OCC1OC(C(C1OP(=O)(O)O)O)n1cnc2c1ncnc2N)O)O)(C)C)O	1
O95573	ACSL3_HUMAN	6.2.1.3	1558028742	Metrxn:98855,rxn34755,HMR_2992|HMR_0401	6.2.1A2(rev)	gamma-Linolenoyl-CoA	1467893192	C03035	CCCCCC=CCC=CCC=CCCCCC(=O)SCCNC(=O)CCNC(=O)C(C(COP(=O)(OP(=O)(OCC1OC(C(C1OP(=O)(O)O)O)n1cnc2c1ncnc2N)O)O)(C)C)O	4-Hydroxybutyryl-CoA	1467966634	C11062				OCCCC(=O)SCCNC(=O)CCNC(=O)C(C(COP(=O)(OP(=O)(OCC1OC(C(C1OP(=O)(O)O)O)n1cnc2c1ncnc2N)O)O)(C)C)O	1
O95573	ACSL3_HUMAN	6.2.1.3	1558028742	Metrxn:98855,rxn34755,HMR_2992|HMR_0401	6.2.1A2(rev)	gamma-Linolenoyl-CoA	1467893192	C03035	CCCCCC=CCC=CCC=CCCCCC(=O)SCCNC(=O)CCNC(=O)C(C(COP(=O)(OP(=O)(OCC1OC(C(C1OP(=O)(O)O)O)n1cnc2c1ncnc2N)O)O)(C)C)O	(3R)-3-Isopropenyl-6-oxoheptanoyl-CoA	1467970157	C11407,C11421				O=C(NCCSC(=O)CC(C(=C)C)CCC(=O)C)CCNC(=O)C(C(COP(=O)(OP(=O)(OCC1OC(C(C1OP(=O)(O)O)O)n1cnc2c1ncnc2N)O)O)(C)C)O	1
O95573	ACSL3_HUMAN	6.2.1.3	1558028742	Metrxn:98855,rxn34755,HMR_2992|HMR_0401	6.2.1A2(rev)	gamma-Linolenoyl-CoA	1467893192	C03035	CCCCCC=CCC=CCC=CCCCCC(=O)SCCNC(=O)CCNC(=O)C(C(COP(=O)(OP(=O)(OCC1OC(C(C1OP(=O)(O)O)O)n1cnc2c1ncnc2N)O)O)(C)C)O	3,4-Dihydro-7-methoxy-2-methylene-3-oxo-2H-1,4-benzoxazine-5-carbonyl-CoA	1467970541	C11448				COc1cc2oc(=C)c(=O)[nH]c2c(c1)C(=O)SCCNC(=O)CCNC(=O)C(C(COP(=O)(OP(=O)(OCC1OC(C(C1OP(=O)(O)O)O)n1cnc2c1ncnc2N)O)O)(C)C)O	1
O95573	ACSL3_HUMAN	6.2.1.3	1558028742	Metrxn:98855,rxn34755,HMR_2992|HMR_0401	6.2.1A2(rev)	gamma-Linolenoyl-CoA	1467893192	C03035	CCCCCC=CCC=CCC=CCCCCC(=O)SCCNC(=O)CCNC(=O)C(C(COP(=O)(OP(=O)(OCC1OC(C(C1OP(=O)(O)O)O)n1cnc2c1ncnc2N)O)O)(C)C)O	Perillyl-CoA	1467975355	C11929				O=C(NCCSC(=O)C1=CCC(CC1)C(=C)C)CCNC(=O)C(C(COP(=O)(OP(=O)(OCC1OC(C(C1OP(=O)(O)O)O)n1cnc2c1ncnc2N)O)O)(C)C)O	1
O95573	ACSL3_HUMAN	6.2.1.3	1558028742	Metrxn:98855,rxn34755,HMR_2992|HMR_0401	6.2.1A2(rev)	gamma-Linolenoyl-CoA	1467893192	C03035	CCCCCC=CCC=CCC=CCCCCC(=O)SCCNC(=O)CCNC(=O)C(C(COP(=O)(OP(=O)(OCC1OC(C(C1OP(=O)(O)O)O)n1cnc2c1ncnc2N)O)O)(C)C)O	2-Hydroxy-4-isopropenylcyclohexane-1-carboxyl-CoA	1467975409	C11934				O=C(NCCSC(=O)C1CCC(CC1O)C(=C)C)CCNC(=O)C(C(COP(=O)(OP(=O)(OCC1OC(C(C1OP(=O)(O)O)O)n1cnc2c1ncnc2N)O)O)(C)C)O	1
O95573	ACSL3_HUMAN	6.2.1.3	1558028742	Metrxn:98855,rxn34755,HMR_2992|HMR_0401	6.2.1A2(rev)	gamma-Linolenoyl-CoA	1467893192	C03035	CCCCCC=CCC=CCC=CCCCCC(=O)SCCNC(=O)CCNC(=O)C(C(COP(=O)(OP(=O)(OCC1OC(C(C1OP(=O)(O)O)O)n1cnc2c1ncnc2N)O)O)(C)C)O	4-Isopropenyl-2-oxy-cyclohexanecarboxyl-CoA	1467975419	C11935				O=C(NCCSC(=O)C1CCC(CC1=O)C(=C)C)CCNC(=O)C(C(COP(=O)(OP(=O)(OCC1OC(C(C1OP(=O)(O)O)O)n1cnc2c1ncnc2N)O)O)(C)C)O	1
O95573	ACSL3_HUMAN	6.2.1.3	1558028742	Metrxn:98855,rxn34755,HMR_2992|HMR_0401	6.2.1A2(rev)	gamma-Linolenoyl-CoA	1467893192	C03035	CCCCCC=CCC=CCC=CCCCCC(=O)SCCNC(=O)CCNC(=O)C(C(COP(=O)(OP(=O)(OCC1OC(C(C1OP(=O)(O)O)O)n1cnc2c1ncnc2N)O)O)(C)C)O	3-Isopropenylpimelyl-CoA	1467975430	C11936				O=C(NCCSC(=O)CCCC(C(=C)C)CC(=O)O)CCNC(=O)C(C(COP(=O)(OP(=O)(OCC1OC(C(C1OP(=O)(O)O)O)n1cnc2c1ncnc2N)O)O)(C)C)O	1
O95573	ACSL3_HUMAN	6.2.1.3	1558028742	Metrxn:98855,rxn34755,HMR_2992|HMR_0401	6.2.1A2(rev)	gamma-Linolenoyl-CoA	1467893192	C03035	CCCCCC=CCC=CCC=CCCCCC(=O)SCCNC(=O)CCNC(=O)C(C(COP(=O)(OP(=O)(OCC1OC(C(C1OP(=O)(O)O)O)n1cnc2c1ncnc2N)O)O)(C)C)O	trans-2-Methyl-5-isopropylhexa-2,5-dienoyl-CoA	1467975539	C11945,C11946			FDB023961|	O=C(NCCSC(=O)C(=CCC(=C)C(C)C)C)CCNC(=O)C(C(COP(=O)(OP(=O)(OCC1OC(C(C1OP(=O)(O)O)O)n1cnc2c1ncnc2N)O)O)(C)C)O	1
O95573	ACSL3_HUMAN	6.2.1.3	1558028742	Metrxn:98855,rxn34755,HMR_2992|HMR_0401	6.2.1A2(rev)	gamma-Linolenoyl-CoA	1467893192	C03035	CCCCCC=CCC=CCC=CCCCCC(=O)SCCNC(=O)CCNC(=O)C(C(COP(=O)(OP(=O)(OCC1OC(C(C1OP(=O)(O)O)O)n1cnc2c1ncnc2N)O)O)(C)C)O	3-Hydroxy-2,6-dimethyl-5-methylene-heptanoyl-CoA	1467975559	C11947			FDB023380|	O=C(NCCSC(=O)C(C(CC(=C)C(C)C)O)C)CCNC(=O)C(C(COP(=O)(OP(=O)(OCC1OC(C(C1OP(=O)(O)O)O)n1cnc2c1ncnc2N)O)O)(C)C)O	1
O95573	ACSL3_HUMAN	6.2.1.3	1558028742	Metrxn:98855,rxn34755,HMR_2992|HMR_0401	6.2.1A2(rev)	gamma-Linolenoyl-CoA	1467893192	C03035	CCCCCC=CCC=CCC=CCCCCC(=O)SCCNC(=O)CCNC(=O)C(C(COP(=O)(OP(=O)(OCC1OC(C(C1OP(=O)(O)O)O)n1cnc2c1ncnc2N)O)O)(C)C)O	2,6-Dimethyl-5-methylene-3-oxo-heptanoyl-CoA	1467975569	C11948				O=C(NCCSC(=O)C(C(=O)CC(=C)C(C)C)C)CCNC(=O)C(C(COP(=O)(OP(=O)(OCC1OC(C(C1OP(=O)(O)O)O)n1cnc2c1ncnc2N)O)O)(C)C)O	1
O95573	ACSL3_HUMAN	6.2.1.3	1558028742	Metrxn:98855,rxn34755,HMR_2992|HMR_0401	6.2.1A2(rev)	gamma-Linolenoyl-CoA	1467893192	C03035	CCCCCC=CCC=CCC=CCCCCC(=O)SCCNC(=O)CCNC(=O)C(C(COP(=O)(OP(=O)(OCC1OC(C(C1OP(=O)(O)O)O)n1cnc2c1ncnc2N)O)O)(C)C)O	3-Isopropylbut-3-enoyl-CoA	1467975579	C11949				O=C(NCCSC(=O)CC(=C)C(C)C)CCNC(=O)C(C(COP(=O)(OP(=O)(OCC1OC(C(C1OP(=O)(O)O)O)n1cnc2c1ncnc2N)O)O)(C)C)O	1
O95573	ACSL3_HUMAN	6.2.1.3	1558028742	Metrxn:98855,rxn34755,HMR_2992|HMR_0401	6.2.1A2(rev)	gamma-Linolenoyl-CoA	1467893192	C03035	CCCCCC=CCC=CCC=CCCCCC(=O)SCCNC(=O)CCNC(=O)C(C(COP(=O)(OP(=O)(OCC1OC(C(C1OP(=O)(O)O)O)n1cnc2c1ncnc2N)O)O)(C)C)O	3,5-Dihydroxyphenylacetyl-CoA	1467979373	C12324				O=C(NCCSC(=O)Cc1cc(O)cc(c1)O)CCNC(=O)C(C(COP(=O)(OP(=O)(OCC1OC(C(C1OP(=O)(O)O)O)n1cnc2c1ncnc2N)O)O)(C)C)O	1
O95573	ACSL3_HUMAN	6.2.1.3	1558028742	Metrxn:98855,rxn34755,HMR_2992|HMR_0401	6.2.1A2(rev)	gamma-Linolenoyl-CoA	1467893192	C03035	CCCCCC=CCC=CCC=CCCCCC(=O)SCCNC(=O)CCNC(=O)C(C(COP(=O)(OP(=O)(OCC1OC(C(C1OP(=O)(O)O)O)n1cnc2c1ncnc2N)O)O)(C)C)O	Pseudoecgonyl-CoA	1467980652	C12450			FDB023909|	O=C(NCCSC(=O)C1C(O)CC2N(C1CC2)C)CCNC(=O)C(C(COP(=O)(OP(=O)(OCC1OC(C(C1OP(=O)(O)O)O)n1cnc2c1ncnc2N)O)O)(C)C)O	1
O95573	ACSL3_HUMAN	6.2.1.3	1558028742	Metrxn:98855,rxn34755,HMR_2992|HMR_0401	6.2.1A2(rev)	gamma-Linolenoyl-CoA	1467893192	C03035	CCCCCC=CCC=CCC=CCCCCC(=O)SCCNC(=O)CCNC(=O)C(C(COP(=O)(OP(=O)(OCC1OC(C(C1OP(=O)(O)O)O)n1cnc2c1ncnc2N)O)O)(C)C)O	Naphthyl-2-methyl-succinyl-CoA	1467987736	C14116				O=C(NCCSC(=O)C(Cc1ccc2c(c1)cccc2)CC(=O)O)CCNC(=O)C(C(COP(=O)(OP(=O)(OCC1OC(C(C1OP(=O)(O)O)O)n1cnc2c1ncnc2N)O)O)(C)C)O	1
O95573	ACSL3_HUMAN	6.2.1.3	1558028742	Metrxn:98855,rxn34755,HMR_2992|HMR_0401	6.2.1A2(rev)	gamma-Linolenoyl-CoA	1467893192	C03035	CCCCCC=CCC=CCC=CCCCCC(=O)SCCNC(=O)CCNC(=O)C(C(COP(=O)(OP(=O)(OCC1OC(C(C1OP(=O)(O)O)O)n1cnc2c1ncnc2N)O)O)(C)C)O	Naphthyl-2-methylene-succinyl-CoA	1467987746	C14117				O=C(NCCSC(=O)C(=Cc1ccc2c(c1)cccc2)CC(=O)O)CCNC(=O)C(C(COP(=O)(OP(=O)(OCC1OC(C(C1OP(=O)(O)O)O)n1cnc2c1ncnc2N)O)O)(C)C)O	1
O95573	ACSL3_HUMAN	6.2.1.3	1558028742	Metrxn:98855,rxn34755,HMR_2992|HMR_0401	6.2.1A2(rev)	gamma-Linolenoyl-CoA	1467893192	C03035	CCCCCC=CCC=CCC=CCCCCC(=O)SCCNC(=O)CCNC(=O)C(C(COP(=O)(OP(=O)(OCC1OC(C(C1OP(=O)(O)O)O)n1cnc2c1ncnc2N)O)O)(C)C)O	N-Methylanthraniloyl-CoA	1467976983	C12092			FDB031041|Abalone; Abiyuch; Acerola; Acorn; Adzuki bean; Agar; Agave; Alaska blueberry; Alaska wild rhubarb; Alfalfa; Allium (Onion); Allspice; Almond; Alpine sweetvetch; Amaranth; American butterfish; American cranberry; American pokeweed; Angelica; Anise; Annual wild rice; Apple; Apricot; Arctic blackberry; Arrowhead; Arrowroot; Asian pear; Asparagus; Atlantic herring; Avocado; Babassu palm; Ba…	CNc1ccccc1C(=O)SCCNC(=O)CCNC(=O)C(C(COP(=O)(OP(=O)(OCC1OC(C(C1OP(=O)(O)O)O)n1cnc2c1ncnc2N)O)O)(C)C)O	1
O95573	ACSL3_HUMAN	6.2.1.3	1558028742	Metrxn:98855,rxn34755,HMR_2992|HMR_0401	6.2.1A2(rev)	gamma-Linolenoyl-CoA	1467893192	C03035	CCCCCC=CCC=CCC=CCCCCC(=O)SCCNC(=O)CCNC(=O)C(C(COP(=O)(OP(=O)(OCC1OC(C(C1OP(=O)(O)O)O)n1cnc2c1ncnc2N)O)O)(C)C)O	Naphthyl-2-hydroxymethyl-succinyl CoA	1467987755	C14118				O=C(NCCSC(=O)C(C(c1ccc2c(c1)cccc2)O)CC(=O)O)CCNC(=O)C(C(COP(=O)(OP(=O)(OCC1OC(C(C1OP(=O)(O)O)O)n1cnc2c1ncnc2N)O)O)(C)C)O	1
O95573	ACSL3_HUMAN	6.2.1.3	1558028742	Metrxn:98855,rxn34755,HMR_2992|HMR_0401	6.2.1A2(rev)	gamma-Linolenoyl-CoA	1467893192	C03035	CCCCCC=CCC=CCC=CCCCCC(=O)SCCNC(=O)CCNC(=O)C(C(COP(=O)(OP(=O)(OCC1OC(C(C1OP(=O)(O)O)O)n1cnc2c1ncnc2N)O)O)(C)C)O	Naphthyl-2-oxomethyl-succinyl-CoA	1467987764	C14119				O=C(NCCSC(=O)C(C(=O)c1ccc2c(c1)cccc2)CC(=O)O)CCNC(=O)C(C(COP(=O)(OP(=O)(OCC1OC(C(C1OP(=O)(O)O)O)n1cnc2c1ncnc2N)O)O)(C)C)O	1
O95573	ACSL3_HUMAN	6.2.1.3	1558028742	Metrxn:98855,rxn34755,HMR_2992|HMR_0401	6.2.1A2(rev)	gamma-Linolenoyl-CoA	1467893192	C03035	CCCCCC=CCC=CCC=CCCCCC(=O)SCCNC(=O)CCNC(=O)C(C(COP(=O)(OP(=O)(OCC1OC(C(C1OP(=O)(O)O)O)n1cnc2c1ncnc2N)O)O)(C)C)O	5-Hydroxyferuloyl-CoA	1467978174	C12203		ChEMBLE_NTD	FDB030572|Abalone; Abiyuch; Acerola; Acorn; Adzuki bean; Agar; Agave; Alaska blueberry; Alaska wild rhubarb; Alfalfa; Allium (Onion); Allspice; Almond; Alpine sweetvetch; Amaranth; American butterfish; American cranberry; American pokeweed; Angelica; Anise; Annual wild rice; Apple; Apricot; Arctic blackberry; Arrowhead; Arrowroot; Asian pear; Asparagus; Atlantic herring; Avocado; Babassu palm; Ba…	COc1cc(C=CC(=O)SCCNC(=O)CCNC(=O)C(C(COP(=O)(OP(=O)(OCC2OC(C(C2OP(=O)(O)O)O)n2cnc3c2ncnc3N)O)O)(C)C)O)cc(c1O)O	1
O95573	ACSL3_HUMAN	6.2.1.3	1558028742	Metrxn:98855,rxn34755,HMR_2992|HMR_0401	6.2.1A2(rev)	gamma-Linolenoyl-CoA	1467893192	C03035	CCCCCC=CCC=CCC=CCCCCC(=O)SCCNC(=O)CCNC(=O)C(C(COP(=O)(OP(=O)(OCC1OC(C(C1OP(=O)(O)O)O)n1cnc2c1ncnc2N)O)O)(C)C)O	2-Naphthoyl-CoA	1467987773	C14120				O=C(NCCSC(=O)c1ccc2c(c1)cccc2)CCNC(=O)C(C(COP(=O)(OP(=O)(OCC1OC(C(C1OP(=O)(O)O)O)n1cnc2c1ncnc2N)O)O)(C)C)O	1
O95573	ACSL3_HUMAN	6.2.1.3	1558028742	Metrxn:98855,rxn34755,HMR_2992|HMR_0401	6.2.1A2(rev)	gamma-Linolenoyl-CoA	1467893192	C03035	CCCCCC=CCC=CCC=CCCCCC(=O)SCCNC(=O)CCNC(=O)C(C(COP(=O)(OP(=O)(OCC1OC(C(C1OP(=O)(O)O)O)n1cnc2c1ncnc2N)O)O)(C)C)O	Adipyl-CoA	1467987962	C14143			FDB023290|	O=C(NCCSC(=O)CCCCC(=O)O)CCNC(=O)C(C(COP(=O)(OP(=O)(OCC1OC(C(C1OP(=O)(O)O)O)n1cnc2c1ncnc2N)O)O)(C)C)O	1
O95573	ACSL3_HUMAN	6.2.1.3	1558028742	Metrxn:98855,rxn34755,HMR_2992|HMR_0401	6.2.1A2(rev)	gamma-Linolenoyl-CoA	1467893192	C03035	CCCCCC=CCC=CCC=CCCCCC(=O)SCCNC(=O)CCNC(=O)C(C(COP(=O)(OP(=O)(OCC1OC(C(C1OP(=O)(O)O)O)n1cnc2c1ncnc2N)O)O)(C)C)O	5-Carboxy-2-pentenoyl-CoA	1467987972	C14144			FDB030295|Abalone; Abiyuch; Acerola; Acorn; Adzuki bean; Agar; Agave; Alaska blueberry; Alaska wild rhubarb; Alfalfa; Allium (Onion); Allspice; Almond; Alpine sweetvetch; Amaranth; American butterfish; American cranberry; American pokeweed; Angelica; Anise; Annual wild rice; Apple; Apricot; Arctic blackberry; Arrowhead; Arrowroot; Asian pear; Asparagus; Atlantic herring; Avocado; Babassu palm; Ba…	O=C(NCCSC(=O)C=CCCC(=O)O)CCNC(=O)C(C(COP(=O)(OP(=O)(OCC1OC(C(C1OP(=O)(O)O)O)n1cnc2c1ncnc2N)O)O)(C)C)O	1
O95573	ACSL3_HUMAN	6.2.1.3	1558028742	Metrxn:98855,rxn34755,HMR_2992|HMR_0401	6.2.1A2(rev)	gamma-Linolenoyl-CoA	1467893192	C03035	CCCCCC=CCC=CCC=CCCCCC(=O)SCCNC(=O)CCNC(=O)C(C(COP(=O)(OP(=O)(OCC1OC(C(C1OP(=O)(O)O)O)n1cnc2c1ncnc2N)O)O)(C)C)O	(3S)-3-Hydroxyadipyl-CoA	1467987983	C14145			FDB029085|	OC(CC(=O)SCCNC(=O)CCNC(=O)C(C(COP(=O)(OP(=O)(OCC1OC(C(C1OP(=O)(O)O)O)n1cnc2c1ncnc2N)O)O)(C)C)O)CCC(=O)O	1
O95573	ACSL3_HUMAN	6.2.1.3	1558028742	Metrxn:98855,rxn34755,HMR_2992|HMR_0401	6.2.1A2(rev)	gamma-Linolenoyl-CoA	1467893192	C03035	CCCCCC=CCC=CCC=CCCCCC(=O)SCCNC(=O)CCNC(=O)C(C(COP(=O)(OP(=O)(OCC1OC(C(C1OP(=O)(O)O)O)n1cnc2c1ncnc2N)O)O)(C)C)O	S-2-(Indol-3-yl)acetyl-CoA	1468001838	C15489				O=C(NCCSC(=O)Cc1c[nH]c2c1cccc2)CCNC(=O)C(C(COP(=O)(OP(=O)(OCC1OC(C(C1OP(=O)(O)O)O)n1cnc2c1ncnc2N)O)O)(C)C)O	1
O95573	ACSL3_HUMAN	6.2.1.3	1558028742	Metrxn:98855,rxn34755,HMR_2992|HMR_0401	6.2.1A2(rev)	gamma-Linolenoyl-CoA	1467893192	C03035	CCCCCC=CCC=CCC=CCCCCC(=O)SCCNC(=O)CCNC(=O)C(C(COP(=O)(OP(=O)(OCC1OC(C(C1OP(=O)(O)O)O)n1cnc2c1ncnc2N)O)O)(C)C)O	Phenylglyoxylyl-CoA	1468002189	C15524				O=C(NCCSC(=O)C(=O)c1ccccc1)CCNC(=O)C(C(COP(=O)(OP(=O)(OCC1OC(C(C1OP(=O)(O)O)O)n1cnc2c1ncnc2N)O)O)(C)C)O	1
O95573	ACSL3_HUMAN	6.2.1.3	1558028742	Metrxn:98855,rxn34755,HMR_2992|HMR_0401	6.2.1A2(rev)	gamma-Linolenoyl-CoA	1467893192	C03035	CCCCCC=CCC=CCC=CCCCCC(=O)SCCNC(=O)CCNC(=O)C(C(COP(=O)(OP(=O)(OCC1OC(C(C1OP(=O)(O)O)O)n1cnc2c1ncnc2N)O)O)(C)C)O	(5Z,8Z,11Z,14Z,17Z)-Icosapentaenoyl-CoA	1468007787	C16165			FDB023953|	CCC=CCC=CCC=CCC=CCC=CCCCC(=O)SCCNC(=O)CCNC(=O)C(C(COP(=O)(OP(=O)(OCC1OC(C(C1OP(=O)(O)O)O)n1cnc2c1ncnc2N)O)O)(C)C)O	1
O95573	ACSL3_HUMAN	6.2.1.3	1558028742	Metrxn:98855,rxn34755,HMR_2992|HMR_0401	6.2.1A2(rev)	gamma-Linolenoyl-CoA	1467893192	C03035	CCCCCC=CCC=CCC=CCCCCC(=O)SCCNC(=O)CCNC(=O)C(C(COP(=O)(OP(=O)(OCC1OC(C(C1OP(=O)(O)O)O)n1cnc2c1ncnc2N)O)O)(C)C)O	(7Z,10Z,13Z,16Z,19Z)-Docosapentaenoyl-CoA	1468007797	C16166			FDB023866|	CCC=CCC=CCC=CCC=CCC=CCCCCCC(=O)SCCNC(=O)CCNC(=O)C(C(COP(=O)(OP(=O)(OCC1OC(C(C1OP(=O)(O)O)O)n1cnc2c1ncnc2N)O)O)(C)C)O	1
O95573	ACSL3_HUMAN	6.2.1.3	1558028742	Metrxn:98855,rxn34755,HMR_2992|HMR_0401	6.2.1A2(rev)	gamma-Linolenoyl-CoA	1467893192	C03035	CCCCCC=CCC=CCC=CCCCCC(=O)SCCNC(=O)CCNC(=O)C(C(COP(=O)(OP(=O)(OCC1OC(C(C1OP(=O)(O)O)O)n1cnc2c1ncnc2N)O)O)(C)C)O	(6Z,9Z,12Z,15Z,18Z,21Z)-Tetracosahexaenoyl-CoA	1468007815	C16168			FDB023856|	CCC=CCC=CCC=CCC=CCC=CCC=CCCCCC(=O)SCCNC(=O)CCNC(=O)C(C(COP(=O)(OP(=O)(OCC1OC(C(C1OP(=O)(O)O)O)n1cnc2c1ncnc2N)O)O)(C)C)O	1
O95573	ACSL3_HUMAN	6.2.1.3	1558028742	Metrxn:98855,rxn34755,HMR_2992|HMR_0401	6.2.1A2(rev)	gamma-Linolenoyl-CoA	1467893192	C03035	CCCCCC=CCC=CCC=CCCCCC(=O)SCCNC(=O)CCNC(=O)C(C(COP(=O)(OP(=O)(OCC1OC(C(C1OP(=O)(O)O)O)n1cnc2c1ncnc2N)O)O)(C)C)O	(7Z,10Z,13Z,16Z)-Docosatetraenoyl-CoA	1468007833	C16170				CCCCCC=CCC=CCC=CCC=CCCCCCC(=O)SCCNC(=O)CCNC(=O)C(C(COP(=O)(OP(=O)(OCC1OC(C(C1OP(=O)(O)O)O)n1cnc2c1ncnc2N)O)O)(C)C)O	1
O95573	ACSL3_HUMAN	6.2.1.3	1558028742	Metrxn:98855,rxn34755,HMR_2992|HMR_0401	6.2.1A2(rev)	gamma-Linolenoyl-CoA	1467893192	C03035	CCCCCC=CCC=CCC=CCCCCC(=O)SCCNC(=O)CCNC(=O)C(C(COP(=O)(OP(=O)(OCC1OC(C(C1OP(=O)(O)O)O)n1cnc2c1ncnc2N)O)O)(C)C)O	(9Z,12Z,15Z,18Z)-Tetracosatetraenoyl-CoA	1468007841	C16171			FDB023954|	CCCCCC=CCC=CCC=CCC=CCCCCCCCC(=O)SCCNC(=O)CCNC(=O)C(C(COP(=O)(OP(=O)(OCC1OC(C(C1OP(=O)(O)O)O)n1cnc2c1ncnc2N)O)O)(C)C)O	1
O95573	ACSL3_HUMAN	6.2.1.3	1558028742	Metrxn:98855,rxn34755,HMR_2992|HMR_0401	6.2.1A2(rev)	gamma-Linolenoyl-CoA	1467893192	C03035	CCCCCC=CCC=CCC=CCCCCC(=O)SCCNC(=O)CCNC(=O)C(C(COP(=O)(OP(=O)(OCC1OC(C(C1OP(=O)(O)O)O)n1cnc2c1ncnc2N)O)O)(C)C)O	(4Z,7Z,10Z,13Z,16Z)-Docosapentaenoyl-CoA	1468007859	C16173			FDB023952|	CCCCCC=CCC=CCC=CCC=CCC=CCCC(=O)SCCNC(=O)CCNC(=O)C(C(COP(=O)(OP(=O)(OCC1OC(C(C1OP(=O)(O)O)O)n1cnc2c1ncnc2N)O)O)(C)C)O	1
O95573	ACSL3_HUMAN	6.2.1.3	1558028742	Metrxn:98855,rxn34755,HMR_2992|HMR_0401	6.2.1A2(rev)	gamma-Linolenoyl-CoA	1467893192	C03035	CCCCCC=CCC=CCC=CCCCCC(=O)SCCNC(=O)CCNC(=O)C(C(COP(=O)(OP(=O)(OCC1OC(C(C1OP(=O)(O)O)O)n1cnc2c1ncnc2N)O)O)(C)C)O	(11Z,14Z,17Z)-Icosatrienoyl-CoA	1468007899	C16179				CCC=CCC=CCC=CCCCCCCCCCC(=O)SCCNC(=O)CCNC(=O)C(C(COP(=O)(OP(=O)(OCC1OC(C(C1OP(=O)(O)O)O)n1cnc2c1ncnc2N)O)O)(C)C)O	1
O95573	ACSL3_HUMAN	6.2.1.3	1558028742	Metrxn:98855,rxn34755,HMR_2992|HMR_0401	6.2.1A2(rev)	gamma-Linolenoyl-CoA	1467893192	C03035	CCCCCC=CCC=CCC=CCCCCC(=O)SCCNC(=O)CCNC(=O)C(C(COP(=O)(OP(=O)(OCC1OC(C(C1OP(=O)(O)O)O)n1cnc2c1ncnc2N)O)O)(C)C)O	3-Hydroxyoctadecanoyl-CoA	1468008271	C16217			FDB029169|	CCCCCCCCCCCCCCCC(CC(=O)SCCNC(=O)CCNC(=O)C(C(COP(=O)(OP(=O)(OCC1OC(C(C1OP(=O)(O)O)O)n1cnc2c1ncnc2N)O)O)(C)C)O)O	1
O95573	ACSL3_HUMAN	6.2.1.3	1558028742	Metrxn:98855,rxn34755,HMR_2992|HMR_0401	6.2.1A2(rev)	gamma-Linolenoyl-CoA	1467893192	C03035	CCCCCC=CCC=CCC=CCCCCC(=O)SCCNC(=O)CCNC(=O)C(C(COP(=O)(OP(=O)(OCC1OC(C(C1OP(=O)(O)O)O)n1cnc2c1ncnc2N)O)O)(C)C)O	3-Hydroxy-5-oxohexanoyl-CoA	1468008821	C16273				OC(CC(=O)SCCNC(=O)CCNC(=O)C(C(COP(=O)(OP(=O)(OCC1OC(C(C1OP(=O)(O)O)O)n1cnc2c1ncnc2N)O)O)(C)C)O)CC(=O)C	1
O95573	ACSL3_HUMAN	6.2.1.3	1558028742	Metrxn:98855,rxn34755,HMR_2992|HMR_0401	6.2.1A2(rev)	gamma-Linolenoyl-CoA	1467893192	C03035	CCCCCC=CCC=CCC=CCCCCC(=O)SCCNC(=O)CCNC(=O)C(C(COP(=O)(OP(=O)(OCC1OC(C(C1OP(=O)(O)O)O)n1cnc2c1ncnc2N)O)O)(C)C)O	OPC8-CoA	1468009378	C16327			FDB027897|	CCC=CCC1C(CCCCCCCC(=O)SCCNC(=O)CCNC(=O)C(C(COP(=O)(OP(=O)(OCC2OC(C(C2OP(=O)(O)O)O)n2cnc3c2ncnc3N)O)O)(C)C)O)CCC1=O	1
O95573	ACSL3_HUMAN	6.2.1.3	1558028742	Metrxn:98855,rxn34755,HMR_2992|HMR_0401	6.2.1A2(rev)	gamma-Linolenoyl-CoA	1467893192	C03035	CCCCCC=CCC=CCC=CCCCCC(=O)SCCNC(=O)CCNC(=O)C(C(COP(=O)(OP(=O)(OCC1OC(C(C1OP(=O)(O)O)O)n1cnc2c1ncnc2N)O)O)(C)C)O	trans-2-Enoyl-OPC8-CoA	1468009387	C16328			FDB027904|	CCC=CCC1C(CCCCCC=CC(=O)SCCNC(=O)CCNC(=O)C(C(COP(=O)(OP(=O)(OCC2OC(C(C2OP(=O)(O)O)O)n2cnc3c2ncnc3N)O)O)(C)C)O)CCC1=O	1
O95573	ACSL3_HUMAN	6.2.1.3	1558028742	Metrxn:98855,rxn34755,HMR_2992|HMR_0401	6.2.1A2(rev)	gamma-Linolenoyl-CoA	1467893192	C03035	CCCCCC=CCC=CCC=CCCCCC(=O)SCCNC(=O)CCNC(=O)C(C(COP(=O)(OP(=O)(OCC1OC(C(C1OP(=O)(O)O)O)n1cnc2c1ncnc2N)O)O)(C)C)O	3-Hydroxy-OPC8-CoA	1468009396	C16329				CCC=CCC1C(CCCCCC(CC(=O)SCCNC(=O)CCNC(=O)C(C(COP(=O)(OP(=O)(OCC2OC(C(C2OP(=O)(O)O)O)n2cnc3c2ncnc3N)O)O)(C)C)O)O)CCC1=O	1
O95573	ACSL3_HUMAN	6.2.1.3	1558028742	Metrxn:98855,rxn34755,HMR_2992|HMR_0401	6.2.1A2(rev)	gamma-Linolenoyl-CoA	1467893192	C03035	CCCCCC=CCC=CCC=CCCCCC(=O)SCCNC(=O)CCNC(=O)C(C(COP(=O)(OP(=O)(OCC1OC(C(C1OP(=O)(O)O)O)n1cnc2c1ncnc2N)O)O)(C)C)O	OPC6-CoA	1468009414	C16331			FDB027896|	CCC=CCC1C(CCCCCC(=O)SCCNC(=O)CCNC(=O)C(C(COP(=O)(OP(=O)(OCC2OC(C(C2OP(=O)(O)O)O)n2cnc3c2ncnc3N)O)O)(C)C)O)CCC1=O	1
O95573	ACSL3_HUMAN	6.2.1.3	1558028742	Metrxn:98855,rxn34755,HMR_2992|HMR_0401	6.2.1A2(rev)	gamma-Linolenoyl-CoA	1467893192	C03035	CCCCCC=CCC=CCC=CCCCCC(=O)SCCNC(=O)CCNC(=O)C(C(COP(=O)(OP(=O)(OCC1OC(C(C1OP(=O)(O)O)O)n1cnc2c1ncnc2N)O)O)(C)C)O	trans-2-Enoyl-OPC6-CoA	1468009423	C16332			FDB027903|	CCC=CCC1C(CCCC=CC(=O)SCCNC(=O)CCNC(=O)C(C(COP(=O)(OP(=O)(OCC2OC(C(C2OP(=O)(O)O)O)n2cnc3c2ncnc3N)O)O)(C)C)O)CCC1=O	1
O95573	ACSL3_HUMAN	6.2.1.3	1558028742	Metrxn:98855,rxn34755,HMR_2992|HMR_0401	6.2.1A2(rev)	gamma-Linolenoyl-CoA	1467893192	C03035	CCCCCC=CCC=CCC=CCCCCC(=O)SCCNC(=O)CCNC(=O)C(C(COP(=O)(OP(=O)(OCC1OC(C(C1OP(=O)(O)O)O)n1cnc2c1ncnc2N)O)O)(C)C)O	1,4-Dihydroxy-2-naphthoyl-CoA	1468002384	C15547			FDB030192|Abalone; Abiyuch; Acerola; Acorn; Adzuki bean; Agar; Agave; Alaska blueberry; Alaska wild rhubarb; Alfalfa; Allium (Onion); Allspice; Almond; Alpine sweetvetch; Amaranth; American butterfish; American cranberry; American pokeweed; Angelica; Anise; Annual wild rice; Apple; Apricot; Arctic blackberry; Arrowhead; Arrowroot; Asian pear; Asparagus; Atlantic herring; Avocado; Babassu palm; Ba…	O=C(NCCSC(=O)c1cc(O)c2c(c1O)cccc2)CCNC(=O)C(C(COP(=O)(OP(=O)(OCC1OC(C(C1OP(=O)(O)O)O)n1cnc2c1ncnc2N)O)O)(C)C)O	1
O95573	ACSL3_HUMAN	6.2.1.3	1558028742	Metrxn:98855,rxn34755,HMR_2992|HMR_0401	6.2.1A2(rev)	gamma-Linolenoyl-CoA	1467893192	C03035	CCCCCC=CCC=CCC=CCCCCC(=O)SCCNC(=O)CCNC(=O)C(C(COP(=O)(OP(=O)(OCC1OC(C(C1OP(=O)(O)O)O)n1cnc2c1ncnc2N)O)O)(C)C)O	(9Z,12Z,15Z)-Octadecatrienoyl-CoA	1468007758	C16162			FDB023879|	CCC=CCC=CCC=CCCCCCCCC(=O)SCCNC(=O)CCNC(=O)C(C(COP(=O)(OP(=O)(OCC1OC(C(C1OP(=O)(O)O)O)n1cnc2c1ncnc2N)O)O)(C)C)O	1
O95573	ACSL3_HUMAN	6.2.1.3	1558028742	Metrxn:98855,rxn34755,HMR_2992|HMR_0401	6.2.1A2(rev)	gamma-Linolenoyl-CoA	1467893192	C03035	CCCCCC=CCC=CCC=CCCCCC(=O)SCCNC(=O)CCNC(=O)C(C(COP(=O)(OP(=O)(OCC1OC(C(C1OP(=O)(O)O)O)n1cnc2c1ncnc2N)O)O)(C)C)O	(6Z,9Z,12Z,15Z)-Octadecatetraenoyl-CoA	1468007768	C16163			FDB023955|	CCC=CCC=CCC=CCC=CCCCCC(=O)SCCNC(=O)CCNC(=O)C(C(COP(=O)(OP(=O)(OCC1OC(C(C1OP(=O)(O)O)O)n1cnc2c1ncnc2N)O)O)(C)C)O	1
O95573	ACSL3_HUMAN	6.2.1.3	1558028742	Metrxn:98855,rxn34755,HMR_2992|HMR_0401	6.2.1A2(rev)	gamma-Linolenoyl-CoA	1467893192	C03035	CCCCCC=CCC=CCC=CCCCCC(=O)SCCNC(=O)CCNC(=O)C(C(COP(=O)(OP(=O)(OCC1OC(C(C1OP(=O)(O)O)O)n1cnc2c1ncnc2N)O)O)(C)C)O	(2E)-Octadecenoyl-CoA	1468008283	C16218			FDB023960|Abalone; Abiyuch; Acerola; Acorn; Adzuki bean; Agar; Agave; Alaska blueberry; Alaska wild rhubarb; Alfalfa; Allium (Onion); Allspice; Almond; Alpine sweetvetch; Amaranth; American butterfish; American cranberry; American pokeweed; Angelica; Anise; Annual wild rice; Apple; Apricot; Arctic blackberry; Arrowhead; Arrowroot; Asian pear; Asparagus; Atlantic herring; Avocado; Babassu palm; Ba…	CCCCCCCCCCCCCCCC=CC(=O)SCCNC(=O)CCNC(=O)C(C(COP(=O)(OP(=O)(OCC1OC(C(C1OP(=O)(O)O)O)n1cnc2c1ncnc2N)O)O)(C)C)O	1
O95573	ACSL3_HUMAN	6.2.1.3	1558028742	Metrxn:98855,rxn34755,HMR_2992|HMR_0401	6.2.1A2(rev)	gamma-Linolenoyl-CoA	1467893192	C03035	CCCCCC=CCC=CCC=CCCCCC(=O)SCCNC(=O)CCNC(=O)C(C(COP(=O)(OP(=O)(OCC1OC(C(C1OP(=O)(O)O)O)n1cnc2c1ncnc2N)O)O)(C)C)O	(R)-Phenyllactyl-CoA	1468008662	C16257				O=C(NCCSC(=O)C(Cc1ccccc1)O)CCNC(=O)C(C(COP(=O)(OP(=O)(OCC1OC(C(C1OP(=O)(O)O)O)n1cnc2c1ncnc2N)O)O)(C)C)O	1
O95573	ACSL3_HUMAN	6.2.1.3	1558028742	Metrxn:98855,rxn34755,HMR_2992|HMR_0401	6.2.1A2(rev)	gamma-Linolenoyl-CoA	1467893192	C03035	CCCCCC=CCC=CCC=CCCCCC(=O)SCCNC(=O)CCNC(=O)C(C(COP(=O)(OP(=O)(OCC1OC(C(C1OP(=O)(O)O)O)n1cnc2c1ncnc2N)O)O)(C)C)O	Cyclopropanecarboxyl-CoA	1468008773	C16268				O=C(NCCSC(=O)C1CC1)CCNC(=O)C(C(COP(=O)(OP(=O)(OCC1OC(C(C1OP(=O)(O)O)O)n1cnc2c1ncnc2N)O)O)(C)C)O	1
O95573	ACSL3_HUMAN	6.2.1.3	1558028742	Metrxn:98855,rxn34755,HMR_2992|HMR_0401	6.2.1A2(rev)	gamma-Linolenoyl-CoA	1467893192	C03035	CCCCCC=CCC=CCC=CCCCCC(=O)SCCNC(=O)CCNC(=O)C(C(COP(=O)(OP(=O)(OCC1OC(C(C1OP(=O)(O)O)O)n1cnc2c1ncnc2N)O)O)(C)C)O	3-Hydroxy-OPC6-CoA	1468009432	C16333				CCC=CCC1C(CCCC(CC(=O)SCCNC(=O)CCNC(=O)C(C(COP(=O)(OP(=O)(OCC2OC(C(C2OP(=O)(O)O)O)n2cnc3c2ncnc3N)O)O)(C)C)O)O)CCC1=O	1
O95573	ACSL3_HUMAN	6.2.1.3	1558028742	Metrxn:98855,rxn34755,HMR_2992|HMR_0401	6.2.1A2(rev)	gamma-Linolenoyl-CoA	1467893192	C03035	CCCCCC=CCC=CCC=CCCCCC(=O)SCCNC(=O)CCNC(=O)C(C(COP(=O)(OP(=O)(OCC1OC(C(C1OP(=O)(O)O)O)n1cnc2c1ncnc2N)O)O)(C)C)O	OPC4-CoA	1468009450	C16335			FDB027895|	CCC=CCC1C(CCCC(=O)SCCNC(=O)CCNC(=O)C(C(COP(=O)(OP(=O)(OCC2OC(C(C2OP(=O)(O)O)O)n2cnc3c2ncnc3N)O)O)(C)C)O)CCC1=O	1
O95573	ACSL3_HUMAN	6.2.1.3	1558028742	Metrxn:98855,rxn34755,HMR_2992|HMR_0401	6.2.1A2(rev)	gamma-Linolenoyl-CoA	1467893192	C03035	CCCCCC=CCC=CCC=CCCCCC(=O)SCCNC(=O)CCNC(=O)C(C(COP(=O)(OP(=O)(OCC1OC(C(C1OP(=O)(O)O)O)n1cnc2c1ncnc2N)O)O)(C)C)O	trans-2-Enoyl-OPC4-CoA	1468009459	C16336			FDB027902|	CCC=CCC1C(CC=CC(=O)SCCNC(=O)CCNC(=O)C(C(COP(=O)(OP(=O)(OCC2OC(C(C2OP(=O)(O)O)O)n2cnc3c2ncnc3N)O)O)(C)C)O)CCC1=O	1
O95573	ACSL3_HUMAN	6.2.1.3	1558028742	Metrxn:98855,rxn34755,HMR_2992|HMR_0401	6.2.1A2(rev)	gamma-Linolenoyl-CoA	1467893192	C03035	CCCCCC=CCC=CCC=CCCCCC(=O)SCCNC(=O)CCNC(=O)C(C(COP(=O)(OP(=O)(OCC1OC(C(C1OP(=O)(O)O)O)n1cnc2c1ncnc2N)O)O)(C)C)O	3-Hydroxy-OPC4-CoA	1468009468	C16337				CCC=CCC1C(CCC1=O)CC(CC(=O)SCCNC(=O)CCNC(=O)C(C(COP(=O)(OP(=O)(OCC1OC(C(C1OP(=O)(O)O)O)n1cnc2c1ncnc2N)O)O)(C)C)O)O	1
O95573	ACSL3_HUMAN	6.2.1.3	1558028742	Metrxn:98855,rxn34755,HMR_2992|HMR_0401	6.2.1A2(rev)	gamma-Linolenoyl-CoA	1467893192	C03035	CCCCCC=CCC=CCC=CCCCCC(=O)SCCNC(=O)CCNC(=O)C(C(COP(=O)(OP(=O)(OCC1OC(C(C1OP(=O)(O)O)O)n1cnc2c1ncnc2N)O)O)(C)C)O	(3R,6Z,9Z,12Z,15Z,18Z)-3-Hydroxytetracosapentaenoyl-CoA	1468009893	C16388				CCCCCC=CCC=CCC=CCC=CCC=CCCC(CC(=O)SCCNC(=O)CCNC(=O)C(C(COP(=O)(OP(=O)(OCC1OC(C(C1OP(=O)(O)O)O)n1cnc2c1ncnc2N)O)O)(C)C)O)O	1
O95573	ACSL3_HUMAN	6.2.1.3	1558028742	Metrxn:98855,rxn34755,HMR_2992|HMR_0401	6.2.1A2(rev)	gamma-Linolenoyl-CoA	1467893192	C03035	CCCCCC=CCC=CCC=CCCCCC(=O)SCCNC(=O)CCNC(=O)C(C(COP(=O)(OP(=O)(OCC1OC(C(C1OP(=O)(O)O)O)n1cnc2c1ncnc2N)O)O)(C)C)O	Citronellyl-CoA	1468010630	C16464				CC(CC(=O)SCCNC(=O)CCNC(=O)C(C(COP(=O)(OP(=O)(OCC1OC(C(C1OP(=O)(O)O)O)n1cnc2c1ncnc2N)O)O)(C)C)O)CCC=C(C)C	1
O95573	ACSL3_HUMAN	6.2.1.3	1558028742	Metrxn:98855,rxn34755,HMR_2992|HMR_0401	6.2.1A2(rev)	gamma-Linolenoyl-CoA	1467893192	C03035	CCCCCC=CCC=CCC=CCCCCC(=O)SCCNC(=O)CCNC(=O)C(C(COP(=O)(OP(=O)(OCC1OC(C(C1OP(=O)(O)O)O)n1cnc2c1ncnc2N)O)O)(C)C)O	(2E)-5-Methylhexa-2,4-dienoyl-CoA	1468010665	C16468				O=C(NCCSC(=O)C=CC=C(C)C)CCNC(=O)C(C(COP(=O)(OP(=O)(OCC1OC(C(C1OP(=O)(O)O)O)n1cnc2c1ncnc2N)O)O)(C)C)O	1
O95573	ACSL3_HUMAN	6.2.1.3	1558028742	Metrxn:98855,rxn34755,HMR_2992|HMR_0401	6.2.1A2(rev)	gamma-Linolenoyl-CoA	1467893192	C03035	CCCCCC=CCC=CCC=CCCCCC(=O)SCCNC(=O)CCNC(=O)C(C(COP(=O)(OP(=O)(OCC1OC(C(C1OP(=O)(O)O)O)n1cnc2c1ncnc2N)O)O)(C)C)O	3-Hydroxy-5-methylhex-4-enoyl-CoA	1468010674	C16469				O=C(NCCSC(=O)CC(C=C(C)C)O)CCNC(=O)C(C(COP(=O)(OP(=O)(OCC1OC(C(C1OP(=O)(O)O)O)n1cnc2c1ncnc2N)O)O)(C)C)O	1
O95573	ACSL3_HUMAN	6.2.1.3	1558028742	Metrxn:98855,rxn34755,HMR_2992|HMR_0401	6.2.1A2(rev)	gamma-Linolenoyl-CoA	1467893192	C03035	CCCCCC=CCC=CCC=CCCCCC(=O)SCCNC(=O)CCNC(=O)C(C(COP(=O)(OP(=O)(OCC1OC(C(C1OP(=O)(O)O)O)n1cnc2c1ncnc2N)O)O)(C)C)O	5-Methylhex-4-enoyl-CoA	1468010683	C16470				O=C(NCCSC(=O)CCC=C(C)C)CCNC(=O)C(C(COP(=O)(OP(=O)(OCC1OC(C(C1OP(=O)(O)O)O)n1cnc2c1ncnc2N)O)O)(C)C)O	1
O95573	ACSL3_HUMAN	6.2.1.3	1558028742	Metrxn:98855,rxn34755,HMR_2992|HMR_0401	6.2.1A2(rev)	gamma-Linolenoyl-CoA	1467893192	C03035	CCCCCC=CCC=CCC=CCCCCC(=O)SCCNC(=O)CCNC(=O)C(C(COP(=O)(OP(=O)(OCC1OC(C(C1OP(=O)(O)O)O)n1cnc2c1ncnc2N)O)O)(C)C)O	Docosanoyl-CoA	1468011272	C16528			FDB029210|	CCCCCCCCCCCCCCCCCCCCCC(=O)SCCNC(=O)CCNC(=O)C(C(COP(=O)(OP(=O)(OCC1OC(C(C1OP(=O)(O)O)O)n1cnc2c1ncnc2N)O)O)(C)C)O	1
O95573	ACSL3_HUMAN	6.2.1.3	1558028742	Metrxn:98855,rxn34755,HMR_2992|HMR_0401	6.2.1A2(rev)	gamma-Linolenoyl-CoA	1467893192	C03035	CCCCCC=CCC=CCC=CCCCCC(=O)SCCNC(=O)CCNC(=O)C(C(COP(=O)(OP(=O)(OCC1OC(C(C1OP(=O)(O)O)O)n1cnc2c1ncnc2N)O)O)(C)C)O	Icosenoyl-CoA	1468011292	C16530				CCCCCCCCC=CCCCCCCCCCC(=O)SCCNC(=O)CCNC(=O)C(C(COP(=O)(OP(=O)(OCC1OC(C(C1OP(=O)(O)O)O)n1cnc2c1ncnc2N)O)O)(C)C)O	1
O95573	ACSL3_HUMAN	6.2.1.3	1558028742	Metrxn:98855,rxn34755,HMR_2992|HMR_0401	6.2.1A2(rev)	gamma-Linolenoyl-CoA	1467893192	C03035	CCCCCC=CCC=CCC=CCCCCC(=O)SCCNC(=O)CCNC(=O)C(C(COP(=O)(OP(=O)(OCC1OC(C(C1OP(=O)(O)O)O)n1cnc2c1ncnc2N)O)O)(C)C)O	Docosenoyl-CoA	1468011304	C16531				CCCCCCCCC=CCCCCCCCCCCCC(=O)SCCNC(=O)CCNC(=O)C(C(COP(=O)(OP(=O)(OCC1OC(C(C1OP(=O)(O)O)O)n1cnc2c1ncnc2N)O)O)(C)C)O	1
O95573	ACSL3_HUMAN	6.2.1.3	1558028742	Metrxn:98855,rxn34755,HMR_2992|HMR_0401	6.2.1A2(rev)	gamma-Linolenoyl-CoA	1467893192	C03035	CCCCCC=CCC=CCC=CCCCCC(=O)SCCNC(=O)CCNC(=O)C(C(COP(=O)(OP(=O)(OCC1OC(C(C1OP(=O)(O)O)O)n1cnc2c1ncnc2N)O)O)(C)C)O	(13Z,16Z)-Docosadienoyl-CoA	1468012388	C16645				CCCCCC=CCC=CCCCCCCCCCCCC(=O)SCCNC(=O)CCNC(=O)C(C(COP(=O)(OP(=O)(OCC1OC(C(C1OP(=O)(O)O)O)n1cnc2c1ncnc2N)O)O)(C)C)O	1
O95573	ACSL3_HUMAN	6.2.1.3	1558028742	Metrxn:98855,rxn34755,HMR_2992|HMR_0401	6.2.1A2(rev)	gamma-Linolenoyl-CoA	1467893192	C03035	CCCCCC=CCC=CCC=CCCCCC(=O)SCCNC(=O)CCNC(=O)C(C(COP(=O)(OP(=O)(OCC1OC(C(C1OP(=O)(O)O)O)n1cnc2c1ncnc2N)O)O)(C)C)O	beta-Phenylalanoyl-CoA	1468014214	C16833				O=C(NCCSC(=O)CC(c1ccccc1)N)CCNC(=O)C(C(COP(=O)(OP(=O)(OCC1OC(C(C1OP(=O)(O)O)O)n1cnc2c1ncnc2N)O)O)(C)C)O	1
O95573	ACSL3_HUMAN	6.2.1.3	1558028742	Metrxn:98855,rxn34755,HMR_2992|HMR_0401	6.2.1A2(rev)	gamma-Linolenoyl-CoA	1467893192	C03035	CCCCCC=CCC=CCC=CCCCCC(=O)SCCNC(=O)CCNC(=O)C(C(COP(=O)(OP(=O)(OCC1OC(C(C1OP(=O)(O)O)O)n1cnc2c1ncnc2N)O)O)(C)C)O	p-Coumaroyl-diketide-CoA	1468021922	C17740				O=C(NCCSC(=O)CC(=O)C=Cc1ccc(cc1)O)CCNC(=O)C(C(COP(=O)(OP(=O)(OCC1OC(C(C1OP(=O)(O)O)O)n1cnc2c1ncnc2N)O)O)(C)C)O	1
O95573	ACSL3_HUMAN	6.2.1.3	1558028742	Metrxn:98855,rxn34755,HMR_2992|HMR_0401	6.2.1A2(rev)	gamma-Linolenoyl-CoA	1467893192	C03035	CCCCCC=CCC=CCC=CCCCCC(=O)SCCNC(=O)CCNC(=O)C(C(COP(=O)(OP(=O)(OCC1OC(C(C1OP(=O)(O)O)O)n1cnc2c1ncnc2N)O)O)(C)C)O	(+)-7-Isojasmonic acid CoA	1468009486	C16339			FDB030948|Abalone; Abiyuch; Acerola; Acorn; Adzuki bean; Agar; Agave; Alaska blueberry; Alaska wild rhubarb; Alfalfa; Allium (Onion); Allspice; Almond; Alpine sweetvetch; Amaranth; American butterfish; American cranberry; American pokeweed; Angelica; Anise; Annual wild rice; Apple; Apricot; Arctic blackberry; Arrowhead; Arrowroot; Asian pear; Asparagus; Atlantic herring; Avocado; Babassu palm; Ba…	CCC=CCC1C(CCC1=O)CC(=O)SCCNC(=O)CCNC(=O)C(C(COP(=O)(OP(=O)(OCC1OC(C(C1OP(=O)(O)O)O)n1cnc2c1ncnc2N)O)O)(C)C)O	1
O95573	ACSL3_HUMAN	6.2.1.3	1558028742	Metrxn:98855,rxn34755,HMR_2992|HMR_0401	6.2.1A2(rev)	gamma-Linolenoyl-CoA	1467893192	C03035	CCCCCC=CCC=CCC=CCCCCC(=O)SCCNC(=O)CCNC(=O)C(C(COP(=O)(OP(=O)(OCC1OC(C(C1OP(=O)(O)O)O)n1cnc2c1ncnc2N)O)O)(C)C)O	(2E,6Z,9Z,12Z,15Z,18Z,21Z)-Tetracosaheptaenoyl-CoA	1468009846	C16374			FDB023865|	CCC=CCC=CCC=CCC=CCC=CCC=CCCC=CC(=O)SCCNC(=O)CCNC(=O)C(C(COP(=O)(OP(=O)(OCC1OC(C(C1OP(=O)(O)O)O)n1cnc2c1ncnc2N)O)O)(C)C)O	1
O95573	ACSL3_HUMAN	6.2.1.3	1558028742	Metrxn:98855,rxn34755,HMR_2992|HMR_0401	6.2.1A2(rev)	gamma-Linolenoyl-CoA	1467893192	C03035	CCCCCC=CCC=CCC=CCCCCC(=O)SCCNC(=O)CCNC(=O)C(C(COP(=O)(OP(=O)(OCC1OC(C(C1OP(=O)(O)O)O)n1cnc2c1ncnc2N)O)O)(C)C)O	(3R,6Z,9Z,12Z,15Z,18Z,21Z)-3-Hydroxytetracosahexaenoyl-CoA	1468009855	C16375			FDB029088|	CCC=CCC=CCC=CCC=CCC=CCC=CCCC(CC(=O)SCCNC(=O)CCNC(=O)C(C(COP(=O)(OP(=O)(OCC1OC(C(C1OP(=O)(O)O)O)n1cnc2c1ncnc2N)O)O)(C)C)O)O	1
O95573	ACSL3_HUMAN	6.2.1.3	1558028742	Metrxn:98855,rxn34755,HMR_2992|HMR_0401	6.2.1A2(rev)	gamma-Linolenoyl-CoA	1467893192	C03035	CCCCCC=CCC=CCC=CCCCCC(=O)SCCNC(=O)CCNC(=O)C(C(COP(=O)(OP(=O)(OCC1OC(C(C1OP(=O)(O)O)O)n1cnc2c1ncnc2N)O)O)(C)C)O	Tetracosenoyl-CoA	1468011314	C16532			FDB030177|Abalone; Abiyuch; Acerola; Acorn; Adzuki bean; Agar; Agave; Alaska blueberry; Alaska wild rhubarb; Alfalfa; Allium (Onion); Allspice; Almond; Alpine sweetvetch; Amaranth; American butterfish; American cranberry; American pokeweed; Angelica; Anise; Annual wild rice; Apple; Apricot; Arctic blackberry; Arrowhead; Arrowroot; Asian pear; Asparagus; Atlantic herring; Avocado; Babassu palm; Ba…	CCCCCCCCC=CCCCCCCCCCCCCCC(=O)SCCNC(=O)CCNC(=O)C(C(COP(=O)(OP(=O)(OCC1OC(C(C1OP(=O)(O)O)O)n1cnc2c1ncnc2N)O)O)(C)C)O	1
O95573	ACSL3_HUMAN	6.2.1.3	1558028742	Metrxn:98855,rxn34755,HMR_2992|HMR_0401	6.2.1A2(rev)	gamma-Linolenoyl-CoA	1467893192	C03035	CCCCCC=CCC=CCC=CCCCCC(=O)SCCNC(=O)CCNC(=O)C(C(COP(=O)(OP(=O)(OCC1OC(C(C1OP(=O)(O)O)O)n1cnc2c1ncnc2N)O)O)(C)C)O	Feruloyl-diketide-CoA	1468021931	C17741				COc1cc(C=CC(=O)CC(=O)SCCNC(=O)CCNC(=O)C(C(COP(=O)(OP(=O)(OCC2OC(C(C2OP(=O)(O)O)O)n2cnc3c2ncnc3N)O)O)(C)C)O)ccc1O	1
O95573	ACSL3_HUMAN	6.2.1.3	1558028742	Metrxn:98855,rxn34755,HMR_2992|HMR_0401	6.2.1A2(rev)	gamma-Linolenoyl-CoA	1467893192	C03035	CCCCCC=CCC=CCC=CCCCCC(=O)SCCNC(=O)CCNC(=O)C(C(COP(=O)(OP(=O)(OCC1OC(C(C1OP(=O)(O)O)O)n1cnc2c1ncnc2N)O)O)(C)C)O	3-Methylfumaryl-CoA	1468027200	C18323				O=C(NCCSC(=O)C=C(C(=O)O)C)CCNC(=O)C(C(COP(=O)(OP(=O)(OCC1OC(C(C1OP(=O)(O)O)O)n1cnc2c1ncnc2N)O)O)(C)C)O	1
O95573	ACSL3_HUMAN	6.2.1.3	1558028742	Metrxn:98855,rxn34755,HMR_2992|HMR_0401	6.2.1A2(rev)	gamma-Linolenoyl-CoA	1467893192	C03035	CCCCCC=CCC=CCC=CCCCCC(=O)SCCNC(=O)CCNC(=O)C(C(COP(=O)(OP(=O)(OCC1OC(C(C1OP(=O)(O)O)O)n1cnc2c1ncnc2N)O)O)(C)C)O	(2S)-Methylsuccinyl-CoA	1468027210	C18324				O=C(NCCSC(=O)C(CC(=O)O)C)CCNC(=O)C(C(COP(=O)(OP(=O)(OCC1OC(C(C1OP(=O)(O)O)O)n1cnc2c1ncnc2N)O)O)(C)C)O	1
O95573	ACSL3_HUMAN	6.2.1.3	1558028742	Metrxn:98855,rxn34755,HMR_2992|HMR_0401	6.2.1A2(rev)	gamma-Linolenoyl-CoA	1467893192	C03035	CCCCCC=CCC=CCC=CCCCCC(=O)SCCNC(=O)CCNC(=O)C(C(COP(=O)(OP(=O)(OCC1OC(C(C1OP(=O)(O)O)O)n1cnc2c1ncnc2N)O)O)(C)C)O	Propylmalonyl-CoA	1468031841	C18834				CCCC(C(=O)SCCNC(=O)CCNC(=O)C(C(COP(=O)(OP(=O)(OCC1OC(C(C1OP(=O)(O)O)O)n1cnc2c1ncnc2N)O)O)(C)C)O)C(=O)O	1
O95573	ACSL3_HUMAN	6.2.1.3	1558028742	Metrxn:98855,rxn34755,HMR_2992|HMR_0401	6.2.1A2(rev)	gamma-Linolenoyl-CoA	1467893192	C03035	CCCCCC=CCC=CCC=CCCCCC(=O)SCCNC(=O)CCNC(=O)C(C(COP(=O)(OP(=O)(OCC1OC(C(C1OP(=O)(O)O)O)n1cnc2c1ncnc2N)O)O)(C)C)O	3,4-Didehydroadipyl-CoA	1468039539	C19682				O=C(NCCSC(=O)CC=CCC(=O)O)CCNC(=O)C(C(COP(=O)(OP(=O)(OCC1OC(C(C1OP(=O)(O)O)O)n1cnc2c1ncnc2N)O)O)(C)C)O	1
O95573	ACSL3_HUMAN	6.2.1.3	1558028742	Metrxn:98855,rxn34755,HMR_2992|HMR_0401	6.2.1A2(rev)	gamma-Linolenoyl-CoA	1467893192	C03035	CCCCCC=CCC=CCC=CCCCCC(=O)SCCNC(=O)CCNC(=O)C(C(COP(=O)(OP(=O)(OCC1OC(C(C1OP(=O)(O)O)O)n1cnc2c1ncnc2N)O)O)(C)C)O	3,4-Didehydroadipyl-CoA semialdehyde	1468039547	C19683				O=CCC=CCC(=O)SCCNC(=O)CCNC(=O)C(C(COP(=O)(OP(=O)(OCC1OC(C(C1OP(=O)(O)O)O)n1cnc2c1ncnc2N)O)O)(C)C)O	1
O95573	ACSL3_HUMAN	6.2.1.3	1558028742	Metrxn:98855,rxn34755,HMR_2992|HMR_0401	6.2.1A2(rev)	gamma-Linolenoyl-CoA	1467893192	C03035	CCCCCC=CCC=CCC=CCCCCC(=O)SCCNC(=O)CCNC(=O)C(C(COP(=O)(OP(=O)(OCC1OC(C(C1OP(=O)(O)O)O)n1cnc2c1ncnc2N)O)O)(C)C)O	2,3-Epoxy-2,3-dihydrobenzoyl-CoA	1468039555	C19684				O=C(NCCSC(=O)C1=CC=CC(C1O)O)CCNC(=O)C(C(COP(=O)(OP(=O)(OCC1OC(C(C1OP(=O)(O)O)O)n1cnc2c1ncnc2N)O)O)(C)C)O	1
O95573	ACSL3_HUMAN	6.2.1.3	1558028742	Metrxn:98855,rxn34755,HMR_2992|HMR_0401	6.2.1A2(rev)	gamma-Linolenoyl-CoA	1467893192	C03035	CCCCCC=CCC=CCC=CCCCCC(=O)SCCNC(=O)CCNC(=O)C(C(COP(=O)(OP(=O)(OCC1OC(C(C1OP(=O)(O)O)O)n1cnc2c1ncnc2N)O)O)(C)C)O	Sulfoacetyl-CoA	1468039562	C19685				O=C(NCCSC(=O)CS(=O)(=O)O)CCNC(=O)C(C(COP(=O)(OP(=O)(OCC1OC(C(C1OP(=O)(O)O)O)n1cnc2c1ncnc2N)O)O)(C)C)O	1
O95573	ACSL3_HUMAN	6.2.1.3	1558028742	Metrxn:98855,rxn34755,HMR_2992|HMR_0401	6.2.1A2(rev)	gamma-Linolenoyl-CoA	1467893192	C03035	CCCCCC=CCC=CCC=CCCCCC(=O)SCCNC(=O)CCNC(=O)C(C(COP(=O)(OP(=O)(OCC1OC(C(C1OP(=O)(O)O)O)n1cnc2c1ncnc2N)O)O)(C)C)O	Fluoroacetyl-CoA	1468040266	C19775				FCC(=O)SCCNC(=O)CCNC(=O)C(C(COP(=O)(OP(=O)(OCC1OC(C(C1OP(=O)(O)O)O)n1cnc2c1ncnc2N)O)O)(C)C)O	1
O95573	ACSL3_HUMAN	6.2.1.3	1558028742	Metrxn:98855,rxn34755,HMR_2992|HMR_0401	6.2.1A2(rev)	gamma-Linolenoyl-CoA	1467893192	C03035	CCCCCC=CCC=CCC=CCCCCC(=O)SCCNC(=O)CCNC(=O)C(C(COP(=O)(OP(=O)(OCC1OC(C(C1OP(=O)(O)O)O)n1cnc2c1ncnc2N)O)O)(C)C)O	2-(1,2-Epoxy-1,2-dihydrophenyl)acetyl-CoA	1468042578	C20062				O=C(NCCSC(=O)CC12C=CC=CC2O1)CCNC(=O)C(C(COP(=O)(OP(=O)(OCC1OC(C(C1OP(=O)(O)O)O)n1cnc2c1ncnc2N)O)O)(C)C)O	1
O95573	ACSL3_HUMAN	6.2.1.3	1558028742	Metrxn:98855,rxn34755,HMR_2992|HMR_0401	6.2.1A2(rev)	gamma-Linolenoyl-CoA	1467893192	C03035	CCCCCC=CCC=CCC=CCCCCC(=O)SCCNC(=O)CCNC(=O)C(C(COP(=O)(OP(=O)(OCC1OC(C(C1OP(=O)(O)O)O)n1cnc2c1ncnc2N)O)O)(C)C)O	[(2R)-3,3,4-Trimethyl-6-oxo-3,6-dihydro-1H-pyran-2-yl]acetyl-CoA	1468044530	C20321				O=C(NCCSC(=O)CC1OC(=O)C=C(C1(C)C)C)CCNC(=O)C(C(COP(=O)(OP(=O)(OCC1OC(C(C1OP(=O)(O)O)O)n1cnc2c1ncnc2N)O)O)(C)C)O	1
O95573	ACSL3_HUMAN	6.2.1.3	1558028742	Metrxn:98855,rxn34755,HMR_2992|HMR_0401	6.2.1A2(rev)	gamma-Linolenoyl-CoA	1467893192	C03035	CCCCCC=CCC=CCC=CCCCCC(=O)SCCNC(=O)CCNC(=O)C(C(COP(=O)(OP(=O)(OCC1OC(C(C1OP(=O)(O)O)O)n1cnc2c1ncnc2N)O)O)(C)C)O	3,5,7-Trioxododecanoyl-CoA	1468045222	C20413				CCCCCC(=O)CC(=O)CC(=O)CC(=O)SCCNC(=O)CCNC(=O)C(C(COP(=O)(OP(=O)(OCC1OC(C(C1OP(=O)(O)O)O)n1cnc2c1ncnc2N)O)O)(C)C)O	1
O95573	ACSL3_HUMAN	6.2.1.3	1558028742	Metrxn:98855,rxn34755,HMR_2992|HMR_0401	6.2.1A2(rev)	gamma-Linolenoyl-CoA	1467893192	C03035	CCCCCC=CCC=CCC=CCCCCC(=O)SCCNC(=O)CCNC(=O)C(C(COP(=O)(OP(=O)(OCC1OC(C(C1OP(=O)(O)O)O)n1cnc2c1ncnc2N)O)O)(C)C)O	2-Oxoglutaryl-CoA	1468045484	C20447				O=C(NCCSC(=O)C(=O)CCC(=O)O)CCNC(=O)C(C(COP(=O)(OP(=O)(OCC1OC(C(C1OP(=O)(O)O)O)n1cnc2c1ncnc2N)O)O)(C)C)O	1
O95573	ACSL3_HUMAN	6.2.1.3	1558028742	Metrxn:98855,rxn34755,HMR_2992|HMR_0401	6.2.1A2(rev)	gamma-Linolenoyl-CoA	1467893192	C03035	CCCCCC=CCC=CCC=CCCCCC(=O)SCCNC(=O)CCNC(=O)C(C(COP(=O)(OP(=O)(OCC1OC(C(C1OP(=O)(O)O)O)n1cnc2c1ncnc2N)O)O)(C)C)O	(E)-4-(Trimethylammonio)but-2-enoyl-CoA	1468047606	C20748				O=C(NCCSC(=O)C=CC[N+](C)(C)C)CCNC(=O)C(C(COP(=O)(OP(=O)(OCC1OC(C(C1OP(=O)(O)O)O)n1cnc2c1ncnc2N)O)O)(C)C)O	1
O95573	ACSL3_HUMAN	6.2.1.3	1558028742	Metrxn:98855,rxn34755,HMR_2992|HMR_0401	6.2.1A2(rev)	gamma-Linolenoyl-CoA	1467893192	C03035	CCCCCC=CCC=CCC=CCCCCC(=O)SCCNC(=O)CCNC(=O)C(C(COP(=O)(OP(=O)(OCC1OC(C(C1OP(=O)(O)O)O)n1cnc2c1ncnc2N)O)O)(C)C)O	4-Trimethylammoniobutanoyl-CoA	1468047614	C20749				O=C(NCCSC(=O)CCC[N+](C)(C)C)CCNC(=O)C(C(COP(=O)(OP(=O)(OCC1OC(C(C1OP(=O)(O)O)O)n1cnc2c1ncnc2N)O)O)(C)C)O	1
O95573	ACSL3_HUMAN	6.2.1.3	1558028742	Metrxn:98855,rxn34755,HMR_2992|HMR_0401	6.2.1A2(rev)	gamma-Linolenoyl-CoA	1467893192	C03035	CCCCCC=CCC=CCC=CCCCCC(=O)SCCNC(=O)CCNC(=O)C(C(COP(=O)(OP(=O)(OCC1OC(C(C1OP(=O)(O)O)O)n1cnc2c1ncnc2N)O)O)(C)C)O	3-[(3aS,4S,7aS)-7a-Methyl-1,5-dioxo-octahydro-1H-inden-4-yl]propanoyl-CoA	1468048273	C20838				O=C(NCCSC(=O)CCC1C(=O)CCC2(C1CCC2=O)C)CCNC(=O)C(C(COP(=O)(OP(=O)(OCC1OC(C(C1OP(=O)(O)O)O)n1cnc2c1ncnc2N)O)O)(C)C)O	1
O95573	ACSL3_HUMAN	6.2.1.3	1558028742	Metrxn:98855,rxn34755,HMR_2992|HMR_0401	6.2.1A2(rev)	gamma-Linolenoyl-CoA	1467893192	C03035	CCCCCC=CCC=CCC=CCCCCC(=O)SCCNC(=O)CCNC(=O)C(C(COP(=O)(OP(=O)(OCC1OC(C(C1OP(=O)(O)O)O)n1cnc2c1ncnc2N)O)O)(C)C)O	2-Hydroxy-7-methoxy-5-methyl-1-naphthoyl-CoA	1468048308	C20842				COc1cc(C)c2c(c1)c(C(=O)SCCNC(=O)CCNC(=O)C(C(COP(=O)(OP(=O)(OCC1OC(C(C1OP(=O)(O)O)O)n1cnc3c1ncnc3N)O)O)(C)C)O)c(cc2)O	1
O95573	ACSL3_HUMAN	6.2.1.3	1558028742	Metrxn:98855,rxn34755,HMR_2992|HMR_0401	6.2.1A2(rev)	gamma-Linolenoyl-CoA	1467893192	C03035	CCCCCC=CCC=CCC=CCCCCC(=O)SCCNC(=O)CCNC(=O)C(C(COP(=O)(OP(=O)(OCC1OC(C(C1OP(=O)(O)O)O)n1cnc2c1ncnc2N)O)O)(C)C)O	3-Oxo-5,6-dehydrosuberyl-CoA	1468041592	C19945			FDB030454|Abalone; Abiyuch; Acerola; Acorn; Adzuki bean; Agar; Agave; Alaska blueberry; Alaska wild rhubarb; Alfalfa; Allium (Onion); Allspice; Almond; Alpine sweetvetch; Amaranth; American butterfish; American cranberry; American pokeweed; Angelica; Anise; Annual wild rice; Apple; Apricot; Arctic blackberry; Arrowhead; Arrowroot; Asian pear; Asparagus; Atlantic herring; Avocado; Babassu palm; Ba…	O=C(NCCSC(=O)CC(=O)CC=CCC(=O)O)CCNC(=O)C(C(COP(=O)(OP(=O)(OCC1OC(C(C1OP(=O)(O)O)O)n1cnc2c1ncnc2N)O)O)(C)C)O	1
O95573	ACSL3_HUMAN	6.2.1.3	1558028742	Metrxn:98855,rxn34755,HMR_2992|HMR_0401	6.2.1A2(rev)	gamma-Linolenoyl-CoA	1467893192	C03035	CCCCCC=CCC=CCC=CCCCCC(=O)SCCNC(=O)CCNC(=O)C(C(COP(=O)(OP(=O)(OCC1OC(C(C1OP(=O)(O)O)O)n1cnc2c1ncnc2N)O)O)(C)C)O	3-Oxo-5,6-dehydrosuberyl-CoA semialdehyde	1468041600	C19946				O=CCC=CCC(=O)CC(=O)SCCNC(=O)CCNC(=O)C(C(COP(=O)(OP(=O)(OCC1OC(C(C1OP(=O)(O)O)O)n1cnc2c1ncnc2N)O)O)(C)C)O	1
O95573	ACSL3_HUMAN	6.2.1.3	1558028742	Metrxn:98855,rxn34755,HMR_2992|HMR_0401	6.2.1A2(rev)	gamma-Linolenoyl-CoA	1467893192	C03035	CCCCCC=CCC=CCC=CCCCCC(=O)SCCNC(=O)CCNC(=O)C(C(COP(=O)(OP(=O)(OCC1OC(C(C1OP(=O)(O)O)O)n1cnc2c1ncnc2N)O)O)(C)C)O	2-Oxepin-2(3H)-ylideneacetyl-CoA	1468041843	C19975				O=C(NCCSC(=O)C=C1CC=CC=CO1)CCNC(=O)C(C(COP(=O)(OP(=O)(OCC1OC(C(C1OP(=O)(O)O)O)n1cnc2c1ncnc2N)O)O)(C)C)O	1
O95573	ACSL3_HUMAN	6.2.1.3	1558028742	Metrxn:98855,rxn34755,HMR_2992|HMR_0401	6.2.1A2(rev)	gamma-Linolenoyl-CoA	1467893192	C03035	CCCCCC=CCC=CCC=CCCCCC(=O)SCCNC(=O)CCNC(=O)C(C(COP(=O)(OP(=O)(OCC1OC(C(C1OP(=O)(O)O)O)n1cnc2c1ncnc2N)O)O)(C)C)O	(25S)-3-Oxocholest-4-en-26-oyl-CoA	1468048293	C20840			FDB030459|Abalone; Abiyuch; Acerola; Acorn; Adzuki bean; Agar; Agave; Alaska blueberry; Alaska wild rhubarb; Alfalfa; Allium (Onion); Allspice; Almond; Alpine sweetvetch; Amaranth; American butterfish; American cranberry; American pokeweed; Angelica; Anise; Annual wild rice; Apple; Apricot; Arctic blackberry; Arrowhead; Arrowroot; Asian pear; Asparagus; Atlantic herring; Avocado; Babassu palm; Ba…	CC(C(C(=O)NCCC(=O)NCCSC(=O)C(CCCC(C1CCC2C1(C)CCC1C2CCC2=CC(=O)CCC12C)C)C)O)(COP(=O)(OP(=O)(OCC1OC(C(C1OP(=O)(O)O)O)n1cnc2c1ncnc2N)O)O)C	1
O95573	ACSL3_HUMAN	6.2.1.3	1558028742	Metrxn:98855,rxn34755,HMR_2992|HMR_0401	6.2.1A2(rev)	gamma-Linolenoyl-CoA	1467893192	C03035	CCCCCC=CCC=CCC=CCCCCC(=O)SCCNC(=O)CCNC(=O)C(C(COP(=O)(OP(=O)(OCC1OC(C(C1OP(=O)(O)O)O)n1cnc2c1ncnc2N)O)O)(C)C)O	3-(Methylthio)propanoyl-CoA	1468048522	C20870				CSCCC(=O)SCCNC(=O)CCNC(=O)C(C(COP(=O)(OP(=O)(OCC1OC(C(C1OP(=O)(O)O)O)n1cnc2c1ncnc2N)O)O)(C)C)O	1
O95573	ACSL3_HUMAN	6.2.1.3	1558028742	Metrxn:98855,rxn34755,HMR_2992|HMR_0401	6.2.1A2(rev)	gamma-Linolenoyl-CoA	1467893192	C03035	CCCCCC=CCC=CCC=CCCCCC(=O)SCCNC(=O)CCNC(=O)C(C(COP(=O)(OP(=O)(OCC1OC(C(C1OP(=O)(O)O)O)n1cnc2c1ncnc2N)O)O)(C)C)O	(Z)-Icos-5-enoyl-CoA	1468049085	C20947				CCCCCCCCCCCCCCC=CCCCC(=O)SCCNC(=O)CCNC(=O)C(C(COP(=O)(OP(=O)(OCC1OC(C(C1OP(=O)(O)O)O)n1cnc2c1ncnc2N)O)O)(C)C)O	1
O95573	ACSL3_HUMAN	6.2.1.3	1558028742	Metrxn:98855,rxn34755,HMR_2992|HMR_0401	6.2.1A2(rev)	gamma-Linolenoyl-CoA	1467893192	C03035	CCCCCC=CCC=CCC=CCCCCC(=O)SCCNC(=O)CCNC(=O)C(C(COP(=O)(OP(=O)(OCC1OC(C(C1OP(=O)(O)O)O)n1cnc2c1ncnc2N)O)O)(C)C)O	3-(Methylthio)acryloyl-CoA	1468049134	C20955				CSC=CC(=O)SCCNC(=O)CCNC(=O)C(C(COP(=O)(OP(=O)(OCC1OC(C(C1OP(=O)(O)O)O)n1cnc2c1ncnc2N)O)O)(C)C)O	1
O95573	ACSL3_HUMAN	6.2.1.3	1558028742	Metrxn:98855,rxn34755,HMR_2992|HMR_0401	6.2.1A2(rev)	gamma-Linolenoyl-CoA	1467893192	C03035	CCCCCC=CCC=CCC=CCCCCC(=O)SCCNC(=O)CCNC(=O)C(C(COP(=O)(OP(=O)(OCC1OC(C(C1OP(=O)(O)O)O)n1cnc2c1ncnc2N)O)O)(C)C)O	3-Hydroxy-3-(methylthio)propanoyl-CoA	1468049221	C20968				CSC(CC(=O)SCCNC(=O)CCNC(=O)C(C(COP(=O)(OP(=O)(OCC1OC(C(C1OP(=O)(O)O)O)n1cnc2c1ncnc2N)O)O)(C)C)O)O	1
O95573	ACSL3_HUMAN	6.2.1.3	1558028742	Metrxn:98855,rxn34755,HMR_2992|HMR_0401	6.2.1A2(rev)	gamma-Linolenoyl-CoA	1467893192	C03035	CCCCCC=CCC=CCC=CCCCCC(=O)SCCNC(=O)CCNC(=O)C(C(COP(=O)(OP(=O)(OCC1OC(C(C1OP(=O)(O)O)O)n1cnc2c1ncnc2N)O)O)(C)C)O	3-Sulfinopropanoyl-CoA	1468049359	C20987				O=C(NCCSC(=O)CCS(=O)O)CCNC(=O)C(C(COP(=O)(OP(=O)(OCC1OC(C(C1OP(=O)(O)O)O)n1cnc2c1ncnc2N)O)O)(C)C)O	1
O95573	ACSL3_HUMAN	6.2.1.3	1558028742	Metrxn:98855,rxn34755,HMR_2992|HMR_0401	6.2.1A2(rev)	gamma-Linolenoyl-CoA	1467893192	C03035	CCCCCC=CCC=CCC=CCCCCC(=O)SCCNC(=O)CCNC(=O)C(C(COP(=O)(OP(=O)(OCC1OC(C(C1OP(=O)(O)O)O)n1cnc2c1ncnc2N)O)O)(C)C)O	(14E)-Hexadec-14-enoyl-CoA	1468049418	C20996,C20997				CC=CCCCCCCCCCCCCC(=O)SCCNC(=O)CCNC(=O)C(C(COP(=O)(OP(=O)(OCC1OC(C(C1OP(=O)(O)O)O)n1cnc2c1ncnc2N)O)O)(C)C)O	1
O95573	ACSL3_HUMAN	6.2.1.3	1558028742	Metrxn:98855,rxn34755,HMR_2992|HMR_0401	6.2.1A2(rev)	gamma-Linolenoyl-CoA	1467893192	C03035	CCCCCC=CCC=CCC=CCCCCC(=O)SCCNC(=O)CCNC(=O)C(C(COP(=O)(OP(=O)(OCC1OC(C(C1OP(=O)(O)O)O)n1cnc2c1ncnc2N)O)O)(C)C)O	(11Z)-Hexadec-11-enoyl-CoA	1468049432	C20998				CCCCC=CCCCCCCCCCC(=O)SCCNC(=O)CCNC(=O)C(C(COP(=O)(OP(=O)(OCC1OC(C(C1OP(=O)(O)O)O)n1cnc2c1ncnc2N)O)O)(C)C)O	1
O95573	ACSL3_HUMAN	6.2.1.3	1558028742	Metrxn:98855,rxn34755,HMR_2992|HMR_0401	6.2.1A2(rev)	gamma-Linolenoyl-CoA	1467893192	C03035	CCCCCC=CCC=CCC=CCCCCC(=O)SCCNC(=O)CCNC(=O)C(C(COP(=O)(OP(=O)(OCC1OC(C(C1OP(=O)(O)O)O)n1cnc2c1ncnc2N)O)O)(C)C)O	(10E,12Z)-Hexadeca-10,12-dienoyl-CoA	1468049439	C20999				CCCC=CC=CCCCCCCCCC(=O)SCCNC(=O)CCNC(=O)C(C(COP(=O)(OP(=O)(OCC1OC(C(C1OP(=O)(O)O)O)n1cnc2c1ncnc2N)O)O)(C)C)O	1
O95573	ACSL3_HUMAN	6.2.1.3	1558028742	Metrxn:98855,rxn34755,HMR_2992|HMR_0401	6.2.1A2(rev)	gamma-Linolenoyl-CoA	1467893192	C03035	CCCCCC=CCC=CCC=CCCCCC(=O)SCCNC(=O)CCNC(=O)C(C(COP(=O)(OP(=O)(OCC1OC(C(C1OP(=O)(O)O)O)n1cnc2c1ncnc2N)O)O)(C)C)O	(9Z,12Z)-Hexadeca-9,12-dienoyl-CoA	1468049446	C21000				CCCC=CCC=CCCCCCCCC(=O)SCCNC(=O)CCNC(=O)C(C(COP(=O)(OP(=O)(OCC1OC(C(C1OP(=O)(O)O)O)n1cnc2c1ncnc2N)O)O)(C)C)O	1
O95573	ACSL3_HUMAN	6.2.1.3	1558028742	Metrxn:98855,rxn34755,HMR_2992|HMR_0401	6.2.1A2(rev)	gamma-Linolenoyl-CoA	1467893192	C03035	CCCCCC=CCC=CCC=CCCCCC(=O)SCCNC(=O)CCNC(=O)C(C(COP(=O)(OP(=O)(OCC1OC(C(C1OP(=O)(O)O)O)n1cnc2c1ncnc2N)O)O)(C)C)O	18-Hydroxyoleoyl-CoA	1468049482	C21005				OCCCCCCCCC=CCCCCCCCC(=O)SCCNC(=O)CCNC(=O)C(C(COP(=O)(OP(=O)(OCC1OC(C(C1OP(=O)(O)O)O)n1cnc2c1ncnc2N)O)O)(C)C)O	1
O95573	ACSL3_HUMAN	6.2.1.3	1558028742	Metrxn:98855,rxn34755,HMR_2992|HMR_0401	6.2.1A2(rev)	gamma-Linolenoyl-CoA	1467893192	C03035	CCCCCC=CCC=CCC=CCCCCC(=O)SCCNC(=O)CCNC(=O)C(C(COP(=O)(OP(=O)(OCC1OC(C(C1OP(=O)(O)O)O)n1cnc2c1ncnc2N)O)O)(C)C)O	18-Hydroxylinoleoyl-CoA	1468049489	C21006				OCCCCCC=CCC=CCCCCCCCC(=O)SCCNC(=O)CCNC(=O)C(C(COP(=O)(OP(=O)(OCC1OC(C(C1OP(=O)(O)O)O)n1cnc2c1ncnc2N)O)O)(C)C)O	1
O95573	ACSL3_HUMAN	6.2.1.3	1558028742	Metrxn:98855,rxn34755,HMR_2992|HMR_0401	6.2.1A2(rev)	gamma-Linolenoyl-CoA	1467893192	C03035	CCCCCC=CCC=CCC=CCCCCC(=O)SCCNC(=O)CCNC(=O)C(C(COP(=O)(OP(=O)(OCC1OC(C(C1OP(=O)(O)O)O)n1cnc2c1ncnc2N)O)O)(C)C)O	Palmitoleoyl-CoA	1468050008	C21072			FDB023321|	CCCCCCC=CCCCCCCCC(=O)SCCNC(=O)CCNC(=O)C(C(COP(=O)(OP(=O)(OCC1OC(C(C1OP(=O)(O)O)O)n1cnc2c1ncnc2N)O)O)(C)C)O	1
O95573	ACSL3_HUMAN	6.2.1.3	1558028742	Metrxn:98855,rxn34755,HMR_2992|HMR_0401	6.2.1A2(rev)	gamma-Linolenoyl-CoA	1467893192	C03035	CCCCCC=CCC=CCC=CCCCCC(=O)SCCNC(=O)CCNC(=O)C(C(COP(=O)(OP(=O)(OCC1OC(C(C1OP(=O)(O)O)O)n1cnc2c1ncnc2N)O)O)(C)C)O	Gentisyl-CoA	1468050080	C21081				O=C(NCCSC(=O)c1cc(O)ccc1O)CCNC(=O)C(C(COP(=O)(OP(=O)(OCC1OC(C(C1OP(=O)(O)O)O)n1cnc2c1ncnc2N)O)O)(C)C)O	1
O95573	ACSL3_HUMAN	6.2.1.3	1558028742	Metrxn:98855,rxn34755,HMR_2992|HMR_0401	6.2.1A2(rev)	gamma-Linolenoyl-CoA	1467893192	C03035	CCCCCC=CCC=CCC=CCCCCC(=O)SCCNC(=O)CCNC(=O)C(C(COP(=O)(OP(=O)(OCC1OC(C(C1OP(=O)(O)O)O)n1cnc2c1ncnc2N)O)O)(C)C)O	(5Z,11Z,14Z)-Icosa-5,11,14-trienoyl-CoA	1468050088	C21082				CCCCCC=CCC=CCCCCC=CCCCC(=O)SCCNC(=O)CCNC(=O)C(C(COP(=O)(OP(=O)(OCC1OC(C(C1OP(=O)(O)O)O)n1cnc2c1ncnc2N)O)O)(C)C)O	1
O95573	ACSL3_HUMAN	6.2.1.3	1558028742	Metrxn:98855,rxn34755,HMR_2992|HMR_0401	6.2.1A2(rev)	gamma-Linolenoyl-CoA	1467893192	C03035	CCCCCC=CCC=CCC=CCCCCC(=O)SCCNC(=O)CCNC(=O)C(C(COP(=O)(OP(=O)(OCC1OC(C(C1OP(=O)(O)O)O)n1cnc2c1ncnc2N)O)O)(C)C)O	(5Z,11Z,14Z,17Z)-Icosa-5,11,14,17-tetraenoyl-CoA	1468050095	C21083				CCC=CCC=CCC=CCCCCC=CCCCC(=O)SCCNC(=O)CCNC(=O)C(C(COP(=O)(OP(=O)(OCC1OC(C(C1OP(=O)(O)O)O)n1cnc2c1ncnc2N)O)O)(C)C)O	1
O95573	ACSL3_HUMAN	6.2.1.3	1558028742	Metrxn:98855,rxn34755,HMR_2992|HMR_0401	6.2.1A2(rev)	gamma-Linolenoyl-CoA	1467893192	C03035	CCCCCC=CCC=CCC=CCCCCC(=O)SCCNC(=O)CCNC(=O)C(C(COP(=O)(OP(=O)(OCC1OC(C(C1OP(=O)(O)O)O)n1cnc2c1ncnc2N)O)O)(C)C)O	(R)-2-Hydroxyisocaproyl-CoA	1468050141	C21089				CC(CC(C(=O)SCCNC(=O)CCNC(=O)C(C(COP(=O)(OP(=O)(OCC1OC(C(C1OP(=O)(O)O)O)n1cnc2c1ncnc2N)O)O)(C)C)O)O)C	1
O95573	ACSL3_HUMAN	6.2.1.3	1558028742	Metrxn:98855,rxn34755,HMR_2992|HMR_0401	6.2.1A2(rev)	gamma-Linolenoyl-CoA	1467893192	C03035	CCCCCC=CCC=CCC=CCCCCC(=O)SCCNC(=O)CCNC(=O)C(C(COP(=O)(OP(=O)(OCC1OC(C(C1OP(=O)(O)O)O)n1cnc2c1ncnc2N)O)O)(C)C)O	Isocaprenoyl-CoA	1468050150	C21090				O=C(NCCSC(=O)C=CC(C)C)CCNC(=O)C(C(COP(=O)(OP(=O)(OCC1OC(C(C1OP(=O)(O)O)O)n1cnc2c1ncnc2N)O)O)(C)C)O	1
O95573	ACSL3_HUMAN	6.2.1.3	1558028742	Metrxn:98855,rxn34755,HMR_2992|HMR_0401	6.2.1A2(rev)	gamma-Linolenoyl-CoA	1467893192	C03035	CCCCCC=CCC=CCC=CCCCCC(=O)SCCNC(=O)CCNC(=O)C(C(COP(=O)(OP(=O)(OCC1OC(C(C1OP(=O)(O)O)O)n1cnc2c1ncnc2N)O)O)(C)C)O	Dihydrocaffeoyl-CoA	1468050793	C21175				O=C(NCCSC(=O)CCc1ccc(c(c1)O)O)CCNC(=O)C(C(COP(=O)(OP(=O)(OCC1OC(C(C1OP(=O)(O)O)O)n1cnc2c1ncnc2N)O)O)(C)C)O	1
O95573	ACSL3_HUMAN	6.2.1.3	1558028742	Metrxn:98855,rxn34755,HMR_2992|HMR_0401	6.2.1A2(rev)	gamma-Linolenoyl-CoA	1467893192	C03035	CCCCCC=CCC=CCC=CCCCCC(=O)SCCNC(=O)CCNC(=O)C(C(COP(=O)(OP(=O)(OCC1OC(C(C1OP(=O)(O)O)O)n1cnc2c1ncnc2N)O)O)(C)C)O	3-Methylglutaconyl-CoA	1468054552	C03231				O=C(NCCSC(=O)CC(=CC(=O)O)C)CCNC(=O)C(C(COP(=O)(OP(=O)(OCC1OC(C(C1OP(=O)(O)O)O)n1cnc2c1ncnc2N)O)O)(C)C)O	1
O95573	ACSL3_HUMAN	6.2.1.3	1558028742	Metrxn:98855,rxn34755,HMR_2992|HMR_0401	6.2.1A2(rev)	gamma-Linolenoyl-CoA	1467893192	C03035	CCCCCC=CCC=CCC=CCCCCC(=O)SCCNC(=O)CCNC(=O)C(C(COP(=O)(OP(=O)(OCC1OC(C(C1OP(=O)(O)O)O)n1cnc2c1ncnc2N)O)O)(C)C)O	2-Succinylbenzoyl-CoA	1468054720	C03160				O=C(NCCSC(=O)c1ccccc1C(=O)CCC(=O)O)CCNC(=O)C(C(COP(=O)(OP(=O)(OCC1OC(C(C1OP(=O)(O)O)O)n1cnc2c1ncnc2N)O)O)(C)C)O	1
O95573	ACSL3_HUMAN	6.2.1.3	1558028742	Metrxn:98855,rxn34755,HMR_2992|HMR_0401	6.2.1A2(rev)	gamma-Linolenoyl-CoA	1467893192	C03035	CCCCCC=CCC=CCC=CCCCCC(=O)SCCNC(=O)CCNC(=O)C(C(COP(=O)(OP(=O)(OCC1OC(C(C1OP(=O)(O)O)O)n1cnc2c1ncnc2N)O)O)(C)C)O	(S)-3-hydroxyhexacosanoyl-CoA	1468095493					CCCCCCCCCCCCCCCCCCCCCCCC(CC(=O)SCCNC(=O)CCNC(=O)C(C(COP(=O)(OP(=O)(OCC1OC(C(C1OP(=O)(O)O)O)n1cnc2c1ncnc2N)O)O)(C)C)O)O	1
O95573	ACSL3_HUMAN	6.2.1.3	1558028742	Metrxn:98855,rxn34755,HMR_2992|HMR_0401	6.2.1A2(rev)	gamma-Linolenoyl-CoA	1467893192	C03035	CCCCCC=CCC=CCC=CCCCCC(=O)SCCNC(=O)CCNC(=O)C(C(COP(=O)(OP(=O)(OCC1OC(C(C1OP(=O)(O)O)O)n1cnc2c1ncnc2N)O)O)(C)C)O	3-Oxohexacosyl-CoA	1468095501					CCCCCCCCCCCCCCCCCCCCCCCC(=O)CC(=O)SCCNC(=O)CCNC(=O)C(C(COP(=O)(OP(=O)(OCC1OC(C(C1OP(=O)(O)O)O)n1cnc2c1ncnc2N)O)O)(C)C)O	1
O95573	ACSL3_HUMAN	6.2.1.3	1558028742	Metrxn:98855,rxn34755,HMR_2992|HMR_0401	6.2.1A2(rev)	gamma-Linolenoyl-CoA	1467893192	C03035	CCCCCC=CCC=CCC=CCCCCC(=O)SCCNC(=O)CCNC(=O)C(C(COP(=O)(OP(=O)(OCC1OC(C(C1OP(=O)(O)O)O)n1cnc2c1ncnc2N)O)O)(C)C)O	(2-trans,4-cis)-deca-2,4-dienoyl-CoA	1468122459				FDB022461|	CCCCCC=CC=CC(=O)SCCNC(=O)CCNC(=O)C(C(COP(=O)(OP(=O)(OCC1OC(C(C1OP(=O)(O)O)O)n1cnc2c1ncnc2N)O)O)(C)C)O	1
O95573	ACSL3_HUMAN	6.2.1.3	1558028742	Metrxn:98855,rxn34755,HMR_2992|HMR_0401	6.2.1A2(rev)	gamma-Linolenoyl-CoA	1467893192	C03035	CCCCCC=CCC=CCC=CCCCCC(=O)SCCNC(=O)CCNC(=O)C(C(COP(=O)(OP(=O)(OCC1OC(C(C1OP(=O)(O)O)O)n1cnc2c1ncnc2N)O)O)(C)C)O	trans-dec-3-enoyl-CoA	1468122499			CHEMBL1949902,CHEMBL1949905	FDB022862|	CCCCCCC=CCC(=O)SCCNC(=O)CCNC(=O)C(C(COP(=O)(OP(=O)(OCC1OC(C(C1OP(=O)(O)O)O)n1cnc2c1ncnc2N)O)O)(C)C)O	1
O95573	ACSL3_HUMAN	6.2.1.3	1558028742	Metrxn:98855,rxn34755,HMR_2992|HMR_0401	6.2.1A2(rev)	gamma-Linolenoyl-CoA	1467893192	C03035	CCCCCC=CCC=CCC=CCCCCC(=O)SCCNC(=O)CCNC(=O)C(C(COP(=O)(OP(=O)(OCC1OC(C(C1OP(=O)(O)O)O)n1cnc2c1ncnc2N)O)O)(C)C)O	cis-dec-4-enoyl-CoA	1468122571				FDB022867|	CCCCCC=CCCC(=O)SCCNC(=O)CCNC(=O)C(C(COP(=O)(OP(=O)(OCC1OC(C(C1OP(=O)(O)O)O)n1cnc2c1ncnc2N)O)O)(C)C)O	1
O95573	ACSL3_HUMAN	6.2.1.3	1558028742	Metrxn:98855,rxn34755,HMR_2992|HMR_0401	6.2.1A2(rev)	gamma-Linolenoyl-CoA	1467893192	C03035	CCCCCC=CCC=CCC=CCCCCC(=O)SCCNC(=O)CCNC(=O)C(C(COP(=O)(OP(=O)(OCC1OC(C(C1OP(=O)(O)O)O)n1cnc2c1ncnc2N)O)O)(C)C)O	heptanoyl-CoA	1468150580				FDB029227|	CCCCCCC(=O)SCCNC(=O)CCNC(=O)C(C(COP(=O)(OP(=O)(OCC1OC(C(C1OP(=O)(O)O)O)n1cnc2c1ncnc2N)O)O)(C)C)O	1
O95573	ACSL3_HUMAN	6.2.1.3	1558028742	Metrxn:98855,rxn34755,HMR_2992|HMR_0401	6.2.1A2(rev)	gamma-Linolenoyl-CoA	1467893192	C03035	CCCCCC=CCC=CCC=CCCCCC(=O)SCCNC(=O)CCNC(=O)C(C(COP(=O)(OP(=O)(OCC1OC(C(C1OP(=O)(O)O)O)n1cnc2c1ncnc2N)O)O)(C)C)O	pristanoyl-CoA	1468176721					CC(CCCC(CCCC(C)C)C)CCCC(C(=O)SCCNC(=O)CCNC(=O)C(C(COP(=O)(OP(=O)(OCC1OC(C(C1OP(=O)(O)O)O)n1cnc2c1ncnc2N)O)O)(C)C)O)C	1
O95573	ACSL3_HUMAN	6.2.1.3	1558028742	Metrxn:98855,rxn34755,HMR_2992|HMR_0401	6.2.1A2(rev)	gamma-Linolenoyl-CoA	1467893192	C03035	CCCCCC=CCC=CCC=CCCCCC(=O)SCCNC(=O)CCNC(=O)C(C(COP(=O)(OP(=O)(OCC1OC(C(C1OP(=O)(O)O)O)n1cnc2c1ncnc2N)O)O)(C)C)O	3-hydroxydocosanoyl-CoA	1468182062					CCCCCCCCCCCCCCCCCCCC(CC(=O)SCCNC(=O)CCNC(=O)C(C(COP(=O)(OP(=O)(OCC1OC(C(C1OP(=O)(O)O)O)n1cnc2c1ncnc2N)O)O)(C)C)O)O	1
O95573	ACSL3_HUMAN	6.2.1.3	1558028742	Metrxn:98855,rxn34755,HMR_2992|HMR_0401	6.2.1A2(rev)	gamma-Linolenoyl-CoA	1467893192	C03035	CCCCCC=CCC=CCC=CCCCCC(=O)SCCNC(=O)CCNC(=O)C(C(COP(=O)(OP(=O)(OCC1OC(C(C1OP(=O)(O)O)O)n1cnc2c1ncnc2N)O)O)(C)C)O	3-Oxodocosanoyl-CoA	1468182086					CCCCCCCCCCCCCCCCCCCC(=O)CC(=O)SCCNC(=O)CCNC(=O)C(C(COP(=O)(OP(=O)(OCC1OC(C(C1OP(=O)(O)O)O)n1cnc2c1ncnc2N)O)O)(C)C)O	1
O95573	ACSL3_HUMAN	6.2.1.3	1558028742	Metrxn:98855,rxn34755,HMR_2992|HMR_0401	6.2.1A2(rev)	gamma-Linolenoyl-CoA	1467893192	C03035	CCCCCC=CCC=CCC=CCCCCC(=O)SCCNC(=O)CCNC(=O)C(C(COP(=O)(OP(=O)(OCC1OC(C(C1OP(=O)(O)O)O)n1cnc2c1ncnc2N)O)O)(C)C)O	hexacosanoyl-CoA	1468185453				FDB023919|	CCCCCCCCCCCCCCCCCCCCCCCCCC(=O)SCCNC(=O)CCNC(=O)C(C(COP(=O)(OP(=O)(OCC1OC(C(C1OP(=O)(O)O)O)n1cnc2c1ncnc2N)O)O)(C)C)O	1
O95573	ACSL3_HUMAN	6.2.1.3	1558028742	Metrxn:98855,rxn34755,HMR_2992|HMR_0401	6.2.1A2(rev)	gamma-Linolenoyl-CoA	1467893192	C03035	CCCCCC=CCC=CCC=CCCCCC(=O)SCCNC(=O)CCNC(=O)C(C(COP(=O)(OP(=O)(OCC1OC(C(C1OP(=O)(O)O)O)n1cnc2c1ncnc2N)O)O)(C)C)O	trans-2-hexacosenoyl-CoA	1468185516					CCCCCCCCCCCCCCCCCCCCCCCC=CC(=O)SCCNC(=O)CCNC(=O)C(C(COP(=O)(OP(=O)(OCC1OC(C(C1OP(=O)(O)O)O)n1cnc2c1ncnc2N)O)O)(C)C)O	1
O95573	ACSL3_HUMAN	6.2.1.3	1558028742	Metrxn:98855,rxn34755,HMR_2992|HMR_0401	6.2.1A2(rev)	gamma-Linolenoyl-CoA	1467893192	C03035	CCCCCC=CCC=CCC=CCCCCC(=O)SCCNC(=O)CCNC(=O)C(C(COP(=O)(OP(=O)(OCC1OC(C(C1OP(=O)(O)O)O)n1cnc2c1ncnc2N)O)O)(C)C)O	(E)-2,3-didehydropristanoyl-CoA	1468231015					CC(CCC=C(C(=O)SCCNC(=O)CCNC(=O)C(C(COP(=O)(OP(=O)(OCC1OC(C(C1OP(=O)(O)O)O)n1cnc2c1ncnc2N)O)O)(C)C)O)C)CCCC(CCCC(C)C)C	1
O95573	ACSL3_HUMAN	6.2.1.3	1558028742	Metrxn:98855,rxn34755,HMR_2992|HMR_0401	6.2.1A2(rev)	gamma-Linolenoyl-CoA	1467893192	C03035	CCCCCC=CCC=CCC=CCCCCC(=O)SCCNC(=O)CCNC(=O)C(C(COP(=O)(OP(=O)(OCC1OC(C(C1OP(=O)(O)O)O)n1cnc2c1ncnc2N)O)O)(C)C)O	4,8-dimethylnonanoyl-CoA	1468231389				FDB028315|	CC(CCC(=O)SCCNC(=O)CCNC(=O)C(C(COP(=O)(OP(=O)(OCC1OC(C(C1OP(=O)(O)O)O)n1cnc2c1ncnc2N)O)O)(C)C)O)CCCC(C)C	1
O95573	ACSL3_HUMAN	6.2.1.3	1558028742	Metrxn:98855,rxn34755,HMR_2992|HMR_0401	6.2.1A2(rev)	gamma-Linolenoyl-CoA	1467893192	C03035	CCCCCC=CCC=CCC=CCCCCC(=O)SCCNC(=O)CCNC(=O)C(C(COP(=O)(OP(=O)(OCC1OC(C(C1OP(=O)(O)O)O)n1cnc2c1ncnc2N)O)O)(C)C)O	3-hydroxypristanoyl-CoA	1468231769					CC(CCC(C(C(=O)SCCNC(=O)CCNC(=O)C(C(COP(=O)(OP(=O)(OCC1OC(C(C1OP(=O)(O)O)O)n1cnc2c1ncnc2N)O)O)(C)C)O)C)O)CCCC(CCCC(C)C)C	1
O95573	ACSL3_HUMAN	6.2.1.3	1558028742	Metrxn:98855,rxn34755,HMR_2992|HMR_0401	6.2.1A2(rev)	gamma-Linolenoyl-CoA	1467893192	C03035	CCCCCC=CCC=CCC=CCCCCC(=O)SCCNC(=O)CCNC(=O)C(C(COP(=O)(OP(=O)(OCC1OC(C(C1OP(=O)(O)O)O)n1cnc2c1ncnc2N)O)O)(C)C)O	(5Z)-tetradecenoyl-CoA	1468265688					CCCCCCCCC=CCCCC(=O)SCCNC(=O)CCNC(=O)C(C(COP(=O)(OP(=O)(OCC1OC(C(C1OP(=O)(O)O)O)n1cnc2c1ncnc2N)O)O)(C)C)O	1
O95573	ACSL3_HUMAN	6.2.1.3	1558028742	Metrxn:98855,rxn34755,HMR_2992|HMR_0401	6.2.1A2(rev)	gamma-Linolenoyl-CoA	1467893192	C03035	CCCCCC=CCC=CCC=CCCCCC(=O)SCCNC(=O)CCNC(=O)C(C(COP(=O)(OP(=O)(OCC1OC(C(C1OP(=O)(O)O)O)n1cnc2c1ncnc2N)O)O)(C)C)O	cis,cis-tetradeca-5,8-dienoyl-CoA	1468265696				FDB022950|	CCCCCC=CCC=CCCCC(=O)SCCNC(=O)CCNC(=O)C(C(COP(=O)(OP(=O)(OCC1OC(C(C1OP(=O)(O)O)O)n1cnc2c1ncnc2N)O)O)(C)C)O	1
O95573	ACSL3_HUMAN	6.2.1.3	1558028742	Metrxn:98855,rxn34755,HMR_2992|HMR_0401	6.2.1A2(rev)	gamma-Linolenoyl-CoA	1467893192	C03035	CCCCCC=CCC=CCC=CCCCCC(=O)SCCNC(=O)CCNC(=O)C(C(COP(=O)(OP(=O)(OCC1OC(C(C1OP(=O)(O)O)O)n1cnc2c1ncnc2N)O)O)(C)C)O	(12Z,15Z,18Z,21Z)-tetracosatetraenoyl-CoA	1468289620					CCC=CCC=CCC=CCC=CCCCCCCCCCCC(=O)SCCNC(=O)CCNC(=O)C(C(COP(=O)(OP(=O)(OCC1OC(C(C1OP(=O)(O)O)O)n1cnc2c1ncnc2N)O)O)(C)C)O	1
O95573	ACSL3_HUMAN	6.2.1.3	1558028742	Metrxn:98855,rxn34755,HMR_2992|HMR_0401	6.2.1A2(rev)	gamma-Linolenoyl-CoA	1467893192	C03035	CCCCCC=CCC=CCC=CCCCCC(=O)SCCNC(=O)CCNC(=O)C(C(COP(=O)(OP(=O)(OCC1OC(C(C1OP(=O)(O)O)O)n1cnc2c1ncnc2N)O)O)(C)C)O	2E,7Z,10Z,13Z,16Z-Docosapentaenoyl-CoA	1468302525					CCCCCC=CCC=CCC=CCC=CCCCC=CC(=O)SCCNC(=O)CCNC(=O)C(C(COP(=O)(OP(=O)(OCC1OC(C(C1OP(=O)(O)O)O)n1cnc2c1ncnc2N)O)O)(C)C)O	1
O95573	ACSL3_HUMAN	6.2.1.3	1558028742	Metrxn:98855,rxn34755,HMR_2992|HMR_0401	6.2.1A2(rev)	gamma-Linolenoyl-CoA	1467893192	C03035	CCCCCC=CCC=CCC=CCCCCC(=O)SCCNC(=O)CCNC(=O)C(C(COP(=O)(OP(=O)(OCC1OC(C(C1OP(=O)(O)O)O)n1cnc2c1ncnc2N)O)O)(C)C)O	Retinoyl CoA	1468454238				FDB023947|	O=C(NCCSC(=O)C=C(C=CC=C(C=CC1=C(C)CCCC1(C)C)C)C)CCNC(=O)C(C(COP(=O)(OP(=O)(OCC1OC(C(C1OP(=O)(O)O)O)n1cnc2c1ncnc2N)O)O)(C)C)O	1
O95573	ACSL3_HUMAN	6.2.1.3	1558028742	Metrxn:98855,rxn34755,HMR_2992|HMR_0401	6.2.1A2(rev)	gamma-Linolenoyl-CoA	1467893192	C03035	CCCCCC=CCC=CCC=CCCCCC(=O)SCCNC(=O)CCNC(=O)C(C(COP(=O)(OP(=O)(OCC1OC(C(C1OP(=O)(O)O)O)n1cnc2c1ncnc2N)O)O)(C)C)O	L-Firefly luciferyl-CoA	1569575446	C21772				O=C(NCCSC(=O)[C@@H]1CSC(=N1)c1nc2c(s1)cc(cc2)O)CCNC(=O)[C@@H](C(COP(=O)(OP(=O)(OC[C@H]1O[C@H]([C@@H]([C@@H]1OP(=O)(O)O)O)n1cnc2c1ncnc2N)O)O)(C)C)O	1
O95573	ACSL3_HUMAN	6.2.1.3	1558028742	Metrxn:98855,rxn34755,HMR_2992|HMR_0401	6.2.1A2(rev)	gamma-Linolenoyl-CoA	1467893192	C03035	CCCCCC=CCC=CCC=CCCCCC(=O)SCCNC(=O)CCNC(=O)C(C(COP(=O)(OP(=O)(OCC1OC(C(C1OP(=O)(O)O)O)n1cnc2c1ncnc2N)O)O)(C)C)O	5-[2-[[3-[[(2R)-4-[[[(2R,3S,4R,5R)-5-(6-aminopurin-9-yl)-4-hydroxy-3-phosphonooxy-2-oxolanyl]methoxy-hydroxyphosphoryl]oxy-hydroxyphosphoryl]oxy-2-hydroxy-3,3-dimethyl-1-oxobutyl]amino]-1-oxopropyl]amino]ethylthio]-3-hydroxy-5-oxopentanoic acid	29762995					OC(CC(=O)SCCNC(=O)CCNC(=O)C(C(COP(=O)(OP(=O)(OCC1OC(C(C1OP(=O)(O)O)O)n1cnc2c1ncnc2N)O)O)(C)C)O)CC(=O)O	1
O95573	ACSL3_HUMAN	6.2.1.3	1558028742	Metrxn:98855,rxn34755,HMR_2992|HMR_0401	6.2.1A2(rev)	gamma-Linolenoyl-CoA	1467893192	C03035	CCCCCC=CCC=CCC=CCCCCC(=O)SCCNC(=O)CCNC(=O)C(C(COP(=O)(OP(=O)(OCC1OC(C(C1OP(=O)(O)O)O)n1cnc2c1ncnc2N)O)O)(C)C)O	S-[2-[3-[[(2R)-4-[[[(2R,3R,5R)-5-(6-aminopurin-9-yl)-4-hydroxy-3-phosphonooxy-tetrahydrofuran-2-yl]methoxy-hydroxy-phosphoryl]oxy-hydroxy-phosphoryl]oxy-2-hydroxy-3,3-dimethyl-butanoyl]amino]propanoylamino]ethyl] henicosanethioate	299576341					CCCCCCCCCCCCCCCCCCCCC(=O)SCCNC(=O)CCNC(=O)C(C(COP(=O)(OP(=O)(OCC1OC(C(C1OP(=O)(O)O)O)n1cnc2c1ncnc2N)O)O)(C)C)O	1
O95573	ACSL3_HUMAN	6.2.1.3	1558028742	Metrxn:98855,rxn34755,HMR_2992|HMR_0401	6.2.1A2(rev)	gamma-Linolenoyl-CoA	1467893192	C03035	CCCCCC=CCC=CCC=CCCCCC(=O)SCCNC(=O)CCNC(=O)C(C(COP(=O)(OP(=O)(OCC1OC(C(C1OP(=O)(O)O)O)n1cnc2c1ncnc2N)O)O)(C)C)O	S-[2-[3-[[(2R)-4-[[[(2R,5R)-5-(6-aminopurin-9-yl)-4-hydroxy-3-phosphonooxy-tetrahydrofuran-2-yl]methoxy-hydroxy-phosphoryl]oxy-hydroxy-phosphoryl]oxy-2-hydroxy-3,3-dimethyl-butanoyl]amino]propanoylamino]ethyl] (5Z,8Z,11Z)-icosa-5,8,11-trienethioate	336846624					CCCCCCCCC=CCC=CCC=CCCCC(=O)SCCNC(=O)CCNC(=O)C(C(COP(=O)(OP(=O)(OCC1OC(C(C1OP(=O)(O)O)O)n1cnc2c1ncnc2N)O)O)(C)C)O	1
O95573	ACSL3_HUMAN	6.2.1.3	1558028742	Metrxn:98855,rxn34755,HMR_2992|HMR_0401	6.2.1A2(rev)	gamma-Linolenoyl-CoA	1467893192	C03035	CCCCCC=CCC=CCC=CCCCCC(=O)SCCNC(=O)CCNC(=O)C(C(COP(=O)(OP(=O)(OCC1OC(C(C1OP(=O)(O)O)O)n1cnc2c1ncnc2N)O)O)(C)C)O	Cyclohexane-1-carboxyl-CoA	5433924	C09823				O=C(NCCSC(=O)C1CCCCC1)CCNC(=O)C(C(COP(=O)(OP(=O)(OCC1OC(C(C1OP(=O)(O)O)O)n1cnc2c1ncnc2N)O)O)(C)C)O	1
O95573	ACSL3_HUMAN	6.2.1.3	1558028742	Metrxn:98855,rxn34755,HMR_2992|HMR_0401	6.2.1A2(rev)	gamma-Linolenoyl-CoA	1467893192	C03035	CCCCCC=CCC=CCC=CCCCCC(=O)SCCNC(=O)CCNC(=O)C(C(COP(=O)(OP(=O)(OCC1OC(C(C1OP(=O)(O)O)O)n1cnc2c1ncnc2N)O)O)(C)C)O	S-[2-[3-[[(2R)-4-[[[(2R,3S,4R,5R)-5-(6-aminopurin-9-yl)-4-hydroxy-3-phosphonooxy-tetrahydrofuran-2-yl]methoxy-hydroxy-phosphoryl]oxy-hydroxy-phosphoryl]oxy-2-hydroxy-3,3-dimethyl-butanoyl]amino]propanoylamino]ethyl] 3-oxoheptanethioate	662289887					CCCCC(=O)CC(=O)SCCNC(=O)CCNC(=O)C(C(COP(=O)(OP(=O)(OCC1OC(C(C1OP(=O)(O)O)O)n1cnc2c1ncnc2N)O)O)(C)C)O	1
O95573	ACSL3_HUMAN	6.2.1.3	1558028742	Metrxn:98855,rxn34755,HMR_2992|HMR_0401	6.2.1A2(rev)	gamma-Linolenoyl-CoA	1467893192	C03035	CCCCCC=CCC=CCC=CCCCCC(=O)SCCNC(=O)CCNC(=O)C(C(COP(=O)(OP(=O)(OCC1OC(C(C1OP(=O)(O)O)O)n1cnc2c1ncnc2N)O)O)(C)C)O	S-[2-[3-[[(2R)-4-[[[(2R,3S,4R,5R)-5-(6-aminopurin-9-yl)-4-hydroxy-3-phosphonooxy-tetrahydrofuran-2-yl]methoxy-hydroxy-phosphoryl]oxy-hydroxy-phosphoryl]oxy-2-hydroxy-3,3-dimethyl-butanoyl]amino]propanoylamino]ethyl] (E)-hept-2-enethioate	662292472					CCCCC=CC(=O)SCCNC(=O)CCNC(=O)C(C(COP(=O)(OP(=O)(OCC1OC(C(C1OP(=O)(O)O)O)n1cnc2c1ncnc2N)O)O)(C)C)O	1
O95573	ACSL3_HUMAN	6.2.1.3	1558028742	Metrxn:98855,rxn34755,HMR_2992|HMR_0401	6.2.1A2(rev)	gamma-Linolenoyl-CoA	1467893192	C03035	CCCCCC=CCC=CCC=CCCCCC(=O)SCCNC(=O)CCNC(=O)C(C(COP(=O)(OP(=O)(OCC1OC(C(C1OP(=O)(O)O)O)n1cnc2c1ncnc2N)O)O)(C)C)O	S-[2-[3-[[(2R)-4-[[[(2R,3S,4R,5R)-5-(6-aminopurin-9-yl)-4-hydroxy-3-phosphonooxy-tetrahydrofuran-2-yl]methoxy-hydroxy-phosphoryl]oxy-hydroxy-phosphoryl]oxy-2-hydroxy-3,3-dimethyl-butanoyl]amino]propanoylamino]ethyl] (5E,8E)-3-hydroxytetradeca-5,8-dienethioate	780090205					CCCCCC=CCC=CCC(CC(=O)SCCNC(=O)CCNC(=O)C(C(COP(=O)(OP(=O)(OCC1OC(C(C1OP(=O)(O)O)O)n1cnc2c1ncnc2N)O)O)(C)C)O)O	1
O95573	ACSL3_HUMAN	6.2.1.3	1558028742	Metrxn:98855,rxn34755,HMR_2992|HMR_0401	6.2.1A2(rev)	gamma-Linolenoyl-CoA	1467893192	C03035	CCCCCC=CCC=CCC=CCCCCC(=O)SCCNC(=O)CCNC(=O)C(C(COP(=O)(OP(=O)(OCC1OC(C(C1OP(=O)(O)O)O)n1cnc2c1ncnc2N)O)O)(C)C)O	S-[2-[3-[[(2R)-4-[[[(2R,3S,4R,5R)-5-(6-aminopurin-9-yl)-4-hydroxy-3-phosphonooxy-tetrahydrofuran-2-yl]methoxy-hydroxy-phosphoryl]oxy-hydroxy-phosphoryl]oxy-2-hydroxy-3,3-dimethyl-butanoyl]amino]propanoylamino]ethyl] furan-3-carbothioate	781852355					O=C(NCCSC(=O)c1cocc1)CCNC(=O)C(C(COP(=O)(OP(=O)(OCC1OC(C(C1OP(=O)(O)O)O)n1cnc2c1ncnc2N)O)O)(C)C)O	1
O95573	ACSL3_HUMAN	6.2.1.3	1569669203	R01280,30751|RHEA: 30752|RHEA: 30754,Metrxn:68501,r0311|FACOAL160p,rxn37337|rxn37332|rxn31932|rxn31929|rxn30377|rxn08452,MNXR102341|MNXR99153,RXN-9623,HMR_2949|HMR_0217	6.2.1A2(rev)	Palmitoyl-CoA	1467867611	C00154	CCCCCCCCCCCCCCCC(=O)SCCN=C(CCN=C(C(C(COP(=O)(OP(=O)(OCC1OC(C(C1OP(=O)(O)O)O)n1cnc2c1ncnc2N)O)O)(C)C)O)O)O	Palmitoyl-CoA	1467867611	C00154			FDB022562|	CCCCCCCCCCCCCCCC(=O)SCCN=C(CCN=C(C(C(COP(=O)(OP(=O)(OCC1OC(C(C1OP(=O)(O)O)O)n1cnc2c1ncnc2N)O)O)(C)C)O)O)O	1
O95573	ACSL3_HUMAN	6.2.1.3	1569669203	R01280,30751|RHEA: 30752|RHEA: 30754,Metrxn:68501,r0311|FACOAL160p,rxn37337|rxn37332|rxn31932|rxn31929|rxn30377|rxn08452,MNXR102341|MNXR99153,RXN-9623,HMR_2949|HMR_0217	6.2.1A2(rev)	Palmitoyl-CoA	1467867611	C00154	CCCCCCCCCCCCCCCC(=O)SCCN=C(CCN=C(C(C(COP(=O)(OP(=O)(OCC1OC(C(C1OP(=O)(O)O)O)n1cnc2c1ncnc2N)O)O)(C)C)O)O)O	2-Methylbutanoyl-CoA	1467877057	C01033,C15980			FDB022387|	CCC(C(=O)SCCN=C(CCN=C(C(C(COP(=O)(OP(=O)(OCC1OC(C(C1OP(=O)(O)O)O)n1cnc2c1ncnc2N)O)O)(C)C)O)O)O)C	1
O95573	ACSL3_HUMAN	6.2.1.3	1569669203	R01280,30751|RHEA: 30752|RHEA: 30754,Metrxn:68501,r0311|FACOAL160p,rxn37337|rxn37332|rxn31932|rxn31929|rxn30377|rxn08452,MNXR102341|MNXR99153,RXN-9623,HMR_2949|HMR_0217	6.2.1A2(rev)	Palmitoyl-CoA	1467867611	C00154	CCCCCCCCCCCCCCCC(=O)SCCN=C(CCN=C(C(C(COP(=O)(OP(=O)(OCC1OC(C(C1OP(=O)(O)O)O)n1cnc2c1ncnc2N)O)O)(C)C)O)O)O	Deoxycholoyl-CoA	1468002509	C15560				OC1CCC2(C(C1)CCC1C2CC(O)C2(C1CCC2C(CCC(=O)SCCN=C(CCN=C(C(C(COP(=O)(OP(=O)(OCC1OC(C(C1OP(=O)(O)O)O)n1cnc2c1ncnc2N)O)O)(C)C)O)O)O)C)C)C	1
O95573	ACSL3_HUMAN	6.2.1.3	1569669203	R01280,30751|RHEA: 30752|RHEA: 30754,Metrxn:68501,r0311|FACOAL160p,rxn37337|rxn37332|rxn31932|rxn31929|rxn30377|rxn08452,MNXR102341|MNXR99153,RXN-9623,HMR_2949|HMR_0217	6.2.1A2(rev)	Palmitoyl-CoA	1467867611	C00154	CCCCCCCCCCCCCCCC(=O)SCCN=C(CCN=C(C(C(COP(=O)(OP(=O)(OCC1OC(C(C1OP(=O)(O)O)O)n1cnc2c1ncnc2N)O)O)(C)C)O)O)O	(8Z,11Z,14Z,17Z)-Icosatetraenoyl-CoA	1468007778	C16164				CCC=CCC=CCC=CCC=CCCCCCCC(=O)SCCN=C(CCN=C(C(C(COP(=O)(OP(=O)(OCC1OC(C(C1OP(=O)(O)O)O)n1cnc2c1ncnc2N)O)O)(C)C)O)O)O	1
O95573	ACSL3_HUMAN	6.2.1.3	1569669203	R01280,30751|RHEA: 30752|RHEA: 30754,Metrxn:68501,r0311|FACOAL160p,rxn37337|rxn37332|rxn31932|rxn31929|rxn30377|rxn08452,MNXR102341|MNXR99153,RXN-9623,HMR_2949|HMR_0217	6.2.1A2(rev)	Palmitoyl-CoA	1467867611	C00154	CCCCCCCCCCCCCCCC(=O)SCCN=C(CCN=C(C(C(COP(=O)(OP(=O)(OCC1OC(C(C1OP(=O)(O)O)O)n1cnc2c1ncnc2N)O)O)(C)C)O)O)O	(9Z,12Z,15Z,18Z,21Z)-Tetracosapentaenoyl-CoA	1468007806	C16167				CCC=CCC=CCC=CCC=CCC=CCCCCCCCC(=O)SCCN=C(CCN=C(C(C(COP(=O)(OP(=O)(OCC1OC(C(C1OP(=O)(O)O)O)n1cnc2c1ncnc2N)O)O)(C)C)O)O)O	1
O95573	ACSL3_HUMAN	6.2.1.3	1569669203	R01280,30751|RHEA: 30752|RHEA: 30754,Metrxn:68501,r0311|FACOAL160p,rxn37337|rxn37332|rxn31932|rxn31929|rxn30377|rxn08452,MNXR102341|MNXR99153,RXN-9623,HMR_2949|HMR_0217	6.2.1A2(rev)	Palmitoyl-CoA	1467867611	C00154	CCCCCCCCCCCCCCCC(=O)SCCN=C(CCN=C(C(C(COP(=O)(OP(=O)(OCC1OC(C(C1OP(=O)(O)O)O)n1cnc2c1ncnc2N)O)O)(C)C)O)O)O	(4Z,7Z,10Z,13Z,16Z,19Z)-Docosahexaenoyl-CoA	1468007824	C16169				CCC=CCC=CCC=CCC=CCC=CCC=CCCC(=O)SCCN=C(CCN=C(C(C(COP(=O)(OP(=O)(OCC1OC(C(C1OP(=O)(O)O)O)n1cnc2c1ncnc2N)O)O)(C)C)O)O)O	1
O95573	ACSL3_HUMAN	6.2.1.3	1569669203	R01280,30751|RHEA: 30752|RHEA: 30754,Metrxn:68501,r0311|FACOAL160p,rxn37337|rxn37332|rxn31932|rxn31929|rxn30377|rxn08452,MNXR102341|MNXR99153,RXN-9623,HMR_2949|HMR_0217	6.2.1A2(rev)	Palmitoyl-CoA	1467867611	C00154	CCCCCCCCCCCCCCCC(=O)SCCN=C(CCN=C(C(C(COP(=O)(OP(=O)(OCC1OC(C(C1OP(=O)(O)O)O)n1cnc2c1ncnc2N)O)O)(C)C)O)O)O	(6Z,9Z,12Z,15Z,18Z)-Tetracosapentaenoyl-CoA	1468007850	C16172				CCCCCC=CCC=CCC=CCC=CCC=CCCCCC(=O)SCCN=C(CCN=C(C(C(COP(=O)(OP(=O)(OCC1OC(C(C1OP(=O)(O)O)O)n1cnc2c1ncnc2N)O)O)(C)C)O)O)O	1
O95573	ACSL3_HUMAN	6.2.1.3	1569669203	R01280,30751|RHEA: 30752|RHEA: 30754,Metrxn:68501,r0311|FACOAL160p,rxn37337|rxn37332|rxn31932|rxn31929|rxn30377|rxn08452,MNXR102341|MNXR99153,RXN-9623,HMR_2949|HMR_0217	6.2.1A2(rev)	Palmitoyl-CoA	1467867611	C00154	CCCCCCCCCCCCCCCC(=O)SCCN=C(CCN=C(C(C(COP(=O)(OP(=O)(OCC1OC(C(C1OP(=O)(O)O)O)n1cnc2c1ncnc2N)O)O)(C)C)O)O)O	7-Methyl-3-oxo-6-octenoyl-CoA	1468010648	C16466				O=C(CC(=O)SCCN=C(CCN=C(C(C(COP(=O)(OP(=O)(OCC1OC(C(C1OP(=O)(O)O)O)n1cnc2c1ncnc2N)O)O)(C)C)O)O)O)CCC=C(C)C	1
O95573	ACSL3_HUMAN	6.2.1.3	1569669203	R01280,30751|RHEA: 30752|RHEA: 30754,Metrxn:68501,r0311|FACOAL160p,rxn37337|rxn37332|rxn31932|rxn31929|rxn30377|rxn08452,MNXR102341|MNXR99153,RXN-9623,HMR_2949|HMR_0217	6.2.1A2(rev)	Palmitoyl-CoA	1467867611	C00154	CCCCCCCCCCCCCCCC(=O)SCCN=C(CCN=C(C(C(COP(=O)(OP(=O)(OCC1OC(C(C1OP(=O)(O)O)O)n1cnc2c1ncnc2N)O)O)(C)C)O)O)O	Tetracosanoyl-CoA	1468011282	C16529			FDB023959|	CCCCCCCCCCCCCCCCCCCCCCCC(=O)SCCN=C(CCN=C(C(C(COP(=O)(OP(=O)(OCC1OC(C(C1OP(=O)(O)O)O)n1cnc2c1ncnc2N)O)O)(C)C)O)O)O	1
O95573	ACSL3_HUMAN	6.2.1.3	1569669203	R01280,30751|RHEA: 30752|RHEA: 30754,Metrxn:68501,r0311|FACOAL160p,rxn37337|rxn37332|rxn31932|rxn31929|rxn30377|rxn08452,MNXR102341|MNXR99153,RXN-9623,HMR_2949|HMR_0217	6.2.1A2(rev)	Palmitoyl-CoA	1467867611	C00154	CCCCCCCCCCCCCCCC(=O)SCCN=C(CCN=C(C(C(COP(=O)(OP(=O)(OCC1OC(C(C1OP(=O)(O)O)O)n1cnc2c1ncnc2N)O)O)(C)C)O)O)O	(2S)-Ethylmalonyl-CoA	1468024513	C18026,C20238				CCC(C(=O)SCCN=C(CCN=C(C(C(COP(=O)(OP(=O)(OCC1OC(C(C1OP(=O)(O)O)O)n1cnc2c1ncnc2N)O)O)(C)C)O)O)O)C(=O)O	1
O95573	ACSL3_HUMAN	6.2.1.3	1569669203	R01280,30751|RHEA: 30752|RHEA: 30754,Metrxn:68501,r0311|FACOAL160p,rxn37337|rxn37332|rxn31932|rxn31929|rxn30377|rxn08452,MNXR102341|MNXR99153,RXN-9623,HMR_2949|HMR_0217	6.2.1A2(rev)	Palmitoyl-CoA	1467867611	C00154	CCCCCCCCCCCCCCCC(=O)SCCN=C(CCN=C(C(C(COP(=O)(OP(=O)(OCC1OC(C(C1OP(=O)(O)O)O)n1cnc2c1ncnc2N)O)O)(C)C)O)O)O	3-hydroxyicosanoyl-CoA	1468182054					CCCCCCCCCCCCCCCCCC(CC(=O)SCCN=C(CCN=C(C(C(COP(=O)(OP(=O)(OCC1OC(C(C1OP(=O)(O)O)O)n1cnc2c1ncnc2N)O)O)(C)C)O)O)O)O	1
O95573	ACSL3_HUMAN	6.2.1.3	1569669203	R01280,30751|RHEA: 30752|RHEA: 30754,Metrxn:68501,r0311|FACOAL160p,rxn37337|rxn37332|rxn31932|rxn31929|rxn30377|rxn08452,MNXR102341|MNXR99153,RXN-9623,HMR_2949|HMR_0217	6.2.1A2(rev)	Palmitoyl-CoA	1467867611	C00154	CCCCCCCCCCCCCCCC(=O)SCCN=C(CCN=C(C(C(COP(=O)(OP(=O)(OCC1OC(C(C1OP(=O)(O)O)O)n1cnc2c1ncnc2N)O)O)(C)C)O)O)O	3-oxoicosanoyl-CoA	1468182078					CCCCCCCCCCCCCCCCCC(=O)CC(=O)SCCN=C(CCN=C(C(C(COP(=O)(OP(=O)(OCC1OC(C(C1OP(=O)(O)O)O)n1cnc2c1ncnc2N)O)O)(C)C)O)O)O	1
O95573	ACSL3_HUMAN	6.2.1.3	1569669203	R01280,30751|RHEA: 30752|RHEA: 30754,Metrxn:68501,r0311|FACOAL160p,rxn37337|rxn37332|rxn31932|rxn31929|rxn30377|rxn08452,MNXR102341|MNXR99153,RXN-9623,HMR_2949|HMR_0217	6.2.1A2(rev)	Palmitoyl-CoA	1467867611	C00154	CCCCCCCCCCCCCCCC(=O)SCCN=C(CCN=C(C(C(COP(=O)(OP(=O)(OCC1OC(C(C1OP(=O)(O)O)O)n1cnc2c1ncnc2N)O)O)(C)C)O)O)O	(7Z,10Z,13Z,16Z)-3-oxodocosatetraenoyl-CoA	1468231134					CCCCCC=CCC=CCC=CCC=CCCCC(=O)CC(=O)SCCN=C(CCN=C(C(C(COP(=O)(OP(=O)(OCC1OC(C(C1OP(=O)(O)O)O)n1cnc2c1ncnc2N)O)O)(C)C)O)O)O	1
O95573	ACSL3_HUMAN	6.2.1.3	1569669203	R01280,30751|RHEA: 30752|RHEA: 30754,Metrxn:68501,r0311|FACOAL160p,rxn37337|rxn37332|rxn31932|rxn31929|rxn30377|rxn08452,MNXR102341|MNXR99153,RXN-9623,HMR_2949|HMR_0217	6.2.1A2(rev)	Palmitoyl-CoA	1467867611	C00154	CCCCCCCCCCCCCCCC(=O)SCCN=C(CCN=C(C(C(COP(=O)(OP(=O)(OCC1OC(C(C1OP(=O)(O)O)O)n1cnc2c1ncnc2N)O)O)(C)C)O)O)O	Linoleoyl-CoA	1467885799	C02050			FDB022403|Abalone; Abiyuch; Acerola; Acorn; Adzuki bean; Agar; Agave; Alaska blueberry; Alaska wild rhubarb; Alfalfa; Allium (Onion); Allspice; Almond; Alpine sweetvetch; Amaranth; American butterfish; American cranberry; American pokeweed; Angelica; Anise; Annual wild rice; Apple; Apricot; Arctic blackberry; Arrowhead; Arrowroot; Asian pear; Asparagus; Atlantic herring; Avocado; Babassu palm; Ba…	CCCCCC=CCC=CCCCCCCCC(=O)SCCN=C(CCN=C(C(C(COP(=O)(OP(=O)(OCC1OC(C(C1OP(=O)(O)O)O)n1cnc2c1ncnc2N)O)O)(C)C)O)O)O	1
O95573	ACSL3_HUMAN	6.2.1.3	1569669203	R01280,30751|RHEA: 30752|RHEA: 30754,Metrxn:68501,r0311|FACOAL160p,rxn37337|rxn37332|rxn31932|rxn31929|rxn30377|rxn08452,MNXR102341|MNXR99153,RXN-9623,HMR_2949|HMR_0217	6.2.1A2(rev)	Palmitoyl-CoA	1467867611	C00154	CCCCCCCCCCCCCCCC(=O)SCCN=C(CCN=C(C(C(COP(=O)(OP(=O)(OCC1OC(C(C1OP(=O)(O)O)O)n1cnc2c1ncnc2N)O)O)(C)C)O)O)O	3alpha,7alpha-Dihydroxy-5beta-cholestanoyl-CoA	1467904514	C04644,C17345,C17346			FDB022875|	OC1CCC2(C(C1)CC(C1C2CCC2(C1CCC2C(CCCC(C(=O)SCCN=C(CCN=C(C(C(COP(=O)(OP(=O)(OCC1OC(C(C1OP(=O)(O)O)O)n1cnc2c1ncnc2N)O)O)(C)C)O)O)O)C)C)C)O)C	1
O95573	ACSL3_HUMAN	6.2.1.3	1569669203	R01280,30751|RHEA: 30752|RHEA: 30754,Metrxn:68501,r0311|FACOAL160p,rxn37337|rxn37332|rxn31932|rxn31929|rxn30377|rxn08452,MNXR102341|MNXR99153,RXN-9623,HMR_2949|HMR_0217	6.2.1A2(rev)	Palmitoyl-CoA	1467867611	C00154	CCCCCCCCCCCCCCCC(=O)SCCN=C(CCN=C(C(C(COP(=O)(OP(=O)(OCC1OC(C(C1OP(=O)(O)O)O)n1cnc2c1ncnc2N)O)O)(C)C)O)O)O	3-Oxoadipyl-CoA	1467887291	C02232			FDB030457|Abalone; Abiyuch; Acerola; Acorn; Adzuki bean; Agar; Agave; Alaska blueberry; Alaska wild rhubarb; Alfalfa; Allium (Onion); Allspice; Almond; Alpine sweetvetch; Amaranth; American butterfish; American cranberry; American pokeweed; Angelica; Anise; Annual wild rice; Apple; Apricot; Arctic blackberry; Arrowhead; Arrowroot; Asian pear; Asparagus; Atlantic herring; Avocado; Babassu palm; Ba…	O=C(CC(=O)SCCN=C(CCN=C(C(C(COP(=O)(OP(=O)(OCC1OC(C(C1OP(=O)(O)O)O)n1cnc2c1ncnc2N)O)O)(C)C)O)O)O)CCC(=O)O	1
O95573	ACSL3_HUMAN	6.2.1.3	1569669203	R01280,30751|RHEA: 30752|RHEA: 30754,Metrxn:68501,r0311|FACOAL160p,rxn37337|rxn37332|rxn31932|rxn31929|rxn30377|rxn08452,MNXR102341|MNXR99153,RXN-9623,HMR_2949|HMR_0217	6.2.1A2(rev)	Palmitoyl-CoA	1467867611	C00154	CCCCCCCCCCCCCCCC(=O)SCCN=C(CCN=C(C(C(COP(=O)(OP(=O)(OCC1OC(C(C1OP(=O)(O)O)O)n1cnc2c1ncnc2N)O)O)(C)C)O)O)O	3-Hydroxy-3-(4-methylpent-3-en-1-yl)glutaryl-CoA	1467904742	C04675				OC(=O)CC(CC(=O)SCCN=C(CCN=C(C(C(COP(=O)(OP(=O)(OCC1OC(C(C1OP(=O)(O)O)O)n1cnc2c1ncnc2N)O)O)(C)C)O)O)O)(CCC=C(C)C)O	1
O95573	ACSL3_HUMAN	6.2.1.3	1569669203	R01280,30751|RHEA: 30752|RHEA: 30754,Metrxn:68501,r0311|FACOAL160p,rxn37337|rxn37332|rxn31932|rxn31929|rxn30377|rxn08452,MNXR102341|MNXR99153,RXN-9623,HMR_2949|HMR_0217	6.2.1A2(rev)	Palmitoyl-CoA	1467867611	C00154	CCCCCCCCCCCCCCCC(=O)SCCN=C(CCN=C(C(C(COP(=O)(OP(=O)(OCC1OC(C(C1OP(=O)(O)O)O)n1cnc2c1ncnc2N)O)O)(C)C)O)O)O	4-Hydroxybenzoyl-CoA	1467892552	C02949		ChEMBLE_NTD	FDB023926|Abalone; Abiyuch; Acerola; Acorn; Adzuki bean; Agar; Agave; Alaska blueberry; Alaska wild rhubarb; Alfalfa; Allium (Onion); Allspice; Almond; Alpine sweetvetch; Amaranth; American butterfish; American cranberry; American pokeweed; Angelica; Anise; Annual wild rice; Apple; Apricot; Arctic blackberry; Arrowhead; Arrowroot; Asian pear; Asparagus; Atlantic herring; Avocado; Babassu palm; Ba…	OC1C(OP(=O)(O)O)C(OC1n1cnc2c1ncnc2N)COP(=O)(OP(=O)(OCC(C(C(=NCCC(=NCCSC(=O)c1ccc(cc1)O)O)O)O)(C)C)O)O	1
O95573	ACSL3_HUMAN	6.2.1.3	1569669203	R01280,30751|RHEA: 30752|RHEA: 30754,Metrxn:68501,r0311|FACOAL160p,rxn37337|rxn37332|rxn31932|rxn31929|rxn30377|rxn08452,MNXR102341|MNXR99153,RXN-9623,HMR_2949|HMR_0217	6.2.1A2(rev)	Palmitoyl-CoA	1467867611	C00154	CCCCCCCCCCCCCCCC(=O)SCCN=C(CCN=C(C(C(COP(=O)(OP(=O)(OCC1OC(C(C1OP(=O)(O)O)O)n1cnc2c1ncnc2N)O)O)(C)C)O)O)O	3alpha,7alpha,12alpha-Trihydroxy-5beta-cholestanoyl-CoA	1467905439	C04760,C15613,C17343			FDB022888|	OC1CCC2(C(C1)CC(C1C2CC(O)C2(C1CCC2C(CCCC(C(=O)SCCN=C(CCN=C(C(C(COP(=O)(OP(=O)(OCC1OC(C(C1OP(=O)(O)O)O)n1cnc2c1ncnc2N)O)O)(C)C)O)O)O)C)C)C)O)C	1
O95573	ACSL3_HUMAN	6.2.1.3	1569669203	R01280,30751|RHEA: 30752|RHEA: 30754,Metrxn:68501,r0311|FACOAL160p,rxn37337|rxn37332|rxn31932|rxn31929|rxn30377|rxn08452,MNXR102341|MNXR99153,RXN-9623,HMR_2949|HMR_0217	6.2.1A2(rev)	Palmitoyl-CoA	1467867611	C00154	CCCCCCCCCCCCCCCC(=O)SCCN=C(CCN=C(C(C(COP(=O)(OP(=O)(OCC1OC(C(C1OP(=O)(O)O)O)n1cnc2c1ncnc2N)O)O)(C)C)O)O)O	8,11,14-Eicosatrienoyl-CoA	1467897121	C03595			FDB030819|Abalone; Abiyuch; Acerola; Acorn; Adzuki bean; Agar; Agave; Alaska blueberry; Alaska wild rhubarb; Alfalfa; Allium (Onion); Allspice; Almond; Alpine sweetvetch; Amaranth; American butterfish; American cranberry; American pokeweed; Angelica; Anise; Annual wild rice; Apple; Apricot; Arctic blackberry; Arrowhead; Arrowroot; Asian pear; Asparagus; Atlantic herring; Avocado; Babassu palm; Ba…	CCCCCC=CCC=CCC=CCCCCCCC(=O)SCCN=C(CCN=C(C(C(COP(=O)(OP(=O)(OCC1OC(C(C1OP(=O)(O)O)O)n1cnc2c1ncnc2N)O)O)(C)C)O)O)O	1
O95573	ACSL3_HUMAN	6.2.1.3	1569669203	R01280,30751|RHEA: 30752|RHEA: 30754,Metrxn:68501,r0311|FACOAL160p,rxn37337|rxn37332|rxn31932|rxn31929|rxn30377|rxn08452,MNXR102341|MNXR99153,RXN-9623,HMR_2949|HMR_0217	6.2.1A2(rev)	Palmitoyl-CoA	1467867611	C00154	CCCCCCCCCCCCCCCC(=O)SCCN=C(CCN=C(C(C(COP(=O)(OP(=O)(OCC1OC(C(C1OP(=O)(O)O)O)n1cnc2c1ncnc2N)O)O)(C)C)O)O)O	4,8,12-Trimethyltridecanoyl-CoA	1467925365	C07296				CC(CCC(=O)SCCN=C(CCN=C(C(C(COP(=O)(OP(=O)(OCC1OC(C(C1OP(=O)(O)O)O)n1cnc2c1ncnc2N)O)O)(C)C)O)O)O)CCCC(CCCC(C)C)C	1
O95573	ACSL3_HUMAN	6.2.1.3	1569669203	R01280,30751|RHEA: 30752|RHEA: 30754,Metrxn:68501,r0311|FACOAL160p,rxn37337|rxn37332|rxn31932|rxn31929|rxn30377|rxn08452,MNXR102341|MNXR99153,RXN-9623,HMR_2949|HMR_0217	6.2.1A2(rev)	Palmitoyl-CoA	1467867611	C00154	CCCCCCCCCCCCCCCC(=O)SCCN=C(CCN=C(C(C(COP(=O)(OP(=O)(OCC1OC(C(C1OP(=O)(O)O)O)n1cnc2c1ncnc2N)O)O)(C)C)O)O)O	(11Z,14Z)-Icosadienoyl-CoA	1468007909	C16180			FDB030087|Abalone; Abiyuch; Acerola; Acorn; Adzuki bean; Agar; Agave; Alaska blueberry; Alaska wild rhubarb; Alfalfa; Allium (Onion); Allspice; Almond; Alpine sweetvetch; Amaranth; American butterfish; American cranberry; American pokeweed; Angelica; Anise; Annual wild rice; Apple; Apricot; Arctic blackberry; Arrowhead; Arrowroot; Asian pear; Asparagus; Atlantic herring; Avocado; Babassu palm; Ba…	CCCCCC=CCC=CCCCCCCCCCC(=O)SCCN=C(CCN=C(C(C(COP(=O)(OP(=O)(OCC1OC(C(C1OP(=O)(O)O)O)n1cnc2c1ncnc2N)O)O)(C)C)O)O)O	1
O95573	ACSL3_HUMAN	6.2.1.3	1569669203	R01280,30751|RHEA: 30752|RHEA: 30754,Metrxn:68501,r0311|FACOAL160p,rxn37337|rxn37332|rxn31932|rxn31929|rxn30377|rxn08452,MNXR102341|MNXR99153,RXN-9623,HMR_2949|HMR_0217	6.2.1A2(rev)	Palmitoyl-CoA	1467867611	C00154	CCCCCCCCCCCCCCCC(=O)SCCN=C(CCN=C(C(C(COP(=O)(OP(=O)(OCC1OC(C(C1OP(=O)(O)O)O)n1cnc2c1ncnc2N)O)O)(C)C)O)O)O	(2E,6Z,9Z,12Z,15Z,18Z)-Tetracosahexaenoyl-CoA	1468009884	C16387				CCCCCC=CCC=CCC=CCC=CCC=CCCC=CC(=O)SCCN=C(CCN=C(C(C(COP(=O)(OP(=O)(OCC1OC(C(C1OP(=O)(O)O)O)n1cnc2c1ncnc2N)O)O)(C)C)O)O)O	1
O95573	ACSL3_HUMAN	6.2.1.3	1569669203	R01280,30751|RHEA: 30752|RHEA: 30754,Metrxn:68501,r0311|FACOAL160p,rxn37337|rxn37332|rxn31932|rxn31929|rxn30377|rxn08452,MNXR102341|MNXR99153,RXN-9623,HMR_2949|HMR_0217	6.2.1A2(rev)	Palmitoyl-CoA	1467867611	C00154	CCCCCCCCCCCCCCCC(=O)SCCN=C(CCN=C(C(C(COP(=O)(OP(=O)(OCC1OC(C(C1OP(=O)(O)O)O)n1cnc2c1ncnc2N)O)O)(C)C)O)O)O	(9Z,12Z,15Z,18Z)-3-oxotetracosatetraenoyl-CoA	1468285546					CCCCCC=CCC=CCC=CCC=CCCCCCC(=O)CC(=O)SCCN=C(CCN=C(C(C(COP(=O)(OP(=O)(OCC1OC(C(C1OP(=O)(O)O)O)n1cnc2c1ncnc2N)O)O)(C)C)O)O)O	1
O95573	ACSL3_HUMAN	6.2.1.3	1569669203	R01280,30751|RHEA: 30752|RHEA: 30754,Metrxn:68501,r0311|FACOAL160p,rxn37337|rxn37332|rxn31932|rxn31929|rxn30377|rxn08452,MNXR102341|MNXR99153,RXN-9623,HMR_2949|HMR_0217	6.2.1A2(rev)	Palmitoyl-CoA	1467867611	C00154	CCCCCCCCCCCCCCCC(=O)SCCN=C(CCN=C(C(C(COP(=O)(OP(=O)(OCC1OC(C(C1OP(=O)(O)O)O)n1cnc2c1ncnc2N)O)O)(C)C)O)O)O	3-Oxoeicosa-cis,cis-11,14-dienoyl-CoA	1468286666					CCCCCC=CCC=CCCCCCCCC(=O)CC(=O)SCCN=C(CCN=C(C(C(COP(=O)(OP(=O)(OCC1OC(C(C1OP(=O)(O)O)O)n1cnc2c1ncnc2N)O)O)(C)C)O)O)O	1
O95573	ACSL3_HUMAN	6.2.1.3	1569669203	R01280,30751|RHEA: 30752|RHEA: 30754,Metrxn:68501,r0311|FACOAL160p,rxn37337|rxn37332|rxn31932|rxn31929|rxn30377|rxn08452,MNXR102341|MNXR99153,RXN-9623,HMR_2949|HMR_0217	6.2.1A2(rev)	Palmitoyl-CoA	1467867611	C00154	CCCCCCCCCCCCCCCC(=O)SCCN=C(CCN=C(C(C(COP(=O)(OP(=O)(OCC1OC(C(C1OP(=O)(O)O)O)n1cnc2c1ncnc2N)O)O)(C)C)O)O)O	pentadecanoyl-CoA	1468288786					CCCCCCCCCCCCCCC(=O)SCCN=C(CCN=C(C(C(COP(=O)(OP(=O)(OCC1OC(C(C1OP(=O)(O)O)O)n1cnc2c1ncnc2N)O)O)(C)C)O)O)O	1
O95573	ACSL3_HUMAN	6.2.1.3	1569669203	R01280,30751|RHEA: 30752|RHEA: 30754,Metrxn:68501,r0311|FACOAL160p,rxn37337|rxn37332|rxn31932|rxn31929|rxn30377|rxn08452,MNXR102341|MNXR99153,RXN-9623,HMR_2949|HMR_0217	6.2.1A2(rev)	Palmitoyl-CoA	1467867611	C00154	CCCCCCCCCCCCCCCC(=O)SCCN=C(CCN=C(C(C(COP(=O)(OP(=O)(OCC1OC(C(C1OP(=O)(O)O)O)n1cnc2c1ncnc2N)O)O)(C)C)O)O)O	(10Z,13Z,16Z,19Z)-3-oxodocosatetraenoyl-CoA	1468288962					CCC=CCC=CCC=CCC=CCCCCCCC(=O)CC(=O)SCCN=C(CCN=C(C(C(COP(=O)(OP(=O)(OCC1OC(C(C1OP(=O)(O)O)O)n1cnc2c1ncnc2N)O)O)(C)C)O)O)O	1
O95573	ACSL3_HUMAN	6.2.1.3	1569669203	R01280,30751|RHEA: 30752|RHEA: 30754,Metrxn:68501,r0311|FACOAL160p,rxn37337|rxn37332|rxn31932|rxn31929|rxn30377|rxn08452,MNXR102341|MNXR99153,RXN-9623,HMR_2949|HMR_0217	6.2.1A2(rev)	Palmitoyl-CoA	1467867611	C00154	CCCCCCCCCCCCCCCC(=O)SCCN=C(CCN=C(C(C(COP(=O)(OP(=O)(OCC1OC(C(C1OP(=O)(O)O)O)n1cnc2c1ncnc2N)O)O)(C)C)O)O)O	(10Z,13Z,16Z)-docosatrienoyl-CoA	1468289604					CCCCCC=CCC=CCC=CCCCCCCCCC(=O)SCCN=C(CCN=C(C(C(COP(=O)(OP(=O)(OCC1OC(C(C1OP(=O)(O)O)O)n1cnc2c1ncnc2N)O)O)(C)C)O)O)O	1
O95573	ACSL3_HUMAN	6.2.1.3	1569669203	R01280,30751|RHEA: 30752|RHEA: 30754,Metrxn:68501,r0311|FACOAL160p,rxn37337|rxn37332|rxn31932|rxn31929|rxn30377|rxn08452,MNXR102341|MNXR99153,RXN-9623,HMR_2949|HMR_0217	6.2.1A2(rev)	Palmitoyl-CoA	1467867611	C00154	CCCCCCCCCCCCCCCC(=O)SCCN=C(CCN=C(C(C(COP(=O)(OP(=O)(OCC1OC(C(C1OP(=O)(O)O)O)n1cnc2c1ncnc2N)O)O)(C)C)O)O)O	(10Z,13Z,16Z)-3-oxodocosatrienoyl-CoA	1468289628					CCCCCC=CCC=CCC=CCCCCCCC(=O)CC(=O)SCCN=C(CCN=C(C(C(COP(=O)(OP(=O)(OCC1OC(C(C1OP(=O)(O)O)O)n1cnc2c1ncnc2N)O)O)(C)C)O)O)O	1
O95573	ACSL3_HUMAN	6.2.1.3	1569669203	R01280,30751|RHEA: 30752|RHEA: 30754,Metrxn:68501,r0311|FACOAL160p,rxn37337|rxn37332|rxn31932|rxn31929|rxn30377|rxn08452,MNXR102341|MNXR99153,RXN-9623,HMR_2949|HMR_0217	6.2.1A2(rev)	Palmitoyl-CoA	1467867611	C00154	CCCCCCCCCCCCCCCC(=O)SCCN=C(CCN=C(C(C(COP(=O)(OP(=O)(OCC1OC(C(C1OP(=O)(O)O)O)n1cnc2c1ncnc2N)O)O)(C)C)O)O)O	(3R,11Z,14Z)-3-hydroxyicosadienoyl-CoA	1468302477					CCCCCC=CCC=CCCCCCCCC(CC(=O)SCCN=C(CCN=C(C(C(COP(=O)(OP(=O)(OCC1OC(C(C1OP(=O)(O)O)O)n1cnc2c1ncnc2N)O)O)(C)C)O)O)O)O	1
O95573	ACSL3_HUMAN	6.2.1.3	1569669203	R01280,30751|RHEA: 30752|RHEA: 30754,Metrxn:68501,r0311|FACOAL160p,rxn37337|rxn37332|rxn31932|rxn31929|rxn30377|rxn08452,MNXR102341|MNXR99153,RXN-9623,HMR_2949|HMR_0217	6.2.1A2(rev)	Palmitoyl-CoA	1467867611	C00154	CCCCCCCCCCCCCCCC(=O)SCCN=C(CCN=C(C(C(COP(=O)(OP(=O)(OCC1OC(C(C1OP(=O)(O)O)O)n1cnc2c1ncnc2N)O)O)(C)C)O)O)O	3(S)-Hydroxy-4-methyl-pentanoyl-CoA	1469255795					O=C(CC(C(C)C)O)SCCN=C(CCN=C(C(C(COP(=O)(OP(=O)(OCC1OC(C(C1OP(=O)(O)O)O)n1cnc2c1ncnc2N)O)O)(C)C)O)O)O	1
O95573	ACSL3_HUMAN	6.2.1.3	1569669203	R01280,30751|RHEA: 30752|RHEA: 30754,Metrxn:68501,r0311|FACOAL160p,rxn37337|rxn37332|rxn31932|rxn31929|rxn30377|rxn08452,MNXR102341|MNXR99153,RXN-9623,HMR_2949|HMR_0217	6.2.1A2(rev)	Palmitoyl-CoA	1467867611	C00154	CCCCCCCCCCCCCCCC(=O)SCCN=C(CCN=C(C(C(COP(=O)(OP(=O)(OCC1OC(C(C1OP(=O)(O)O)O)n1cnc2c1ncnc2N)O)O)(C)C)O)O)O	3-oxo-(2S)-Methylisocapryloyl-CoA	1469256030					CC(CCC(=O)C(C(=O)SCCN=C(CCN=C(C(C(COP(=O)(OP(=O)(OCC1OC(C(C1OP(=O)(O)O)O)n1cnc2c1ncnc2N)O)O)(C)C)O)O)O)C)C	1
O95573	ACSL3_HUMAN	6.2.1.3	1569669203	R01280,30751|RHEA: 30752|RHEA: 30754,Metrxn:68501,r0311|FACOAL160p,rxn37337|rxn37332|rxn31932|rxn31929|rxn30377|rxn08452,MNXR102341|MNXR99153,RXN-9623,HMR_2949|HMR_0217	6.2.1A2(rev)	Palmitoyl-CoA	1467867611	C00154	CCCCCCCCCCCCCCCC(=O)SCCN=C(CCN=C(C(C(COP(=O)(OP(=O)(OCC1OC(C(C1OP(=O)(O)O)O)n1cnc2c1ncnc2N)O)O)(C)C)O)O)O	3(S)-Hydroxy-2(S),6-dimethyl-heptanoyl-CoA	1469256042					CC(CCC(C(C(=O)SCCN=C(CCN=C(C(C(COP(=O)(OP(=O)(OCC1OC(C(C1OP(=O)(O)O)O)n1cnc2c1ncnc2N)O)O)(C)C)O)O)O)C)O)C	1
O95573	ACSL3_HUMAN	6.2.1.3	1569669203	R01280,30751|RHEA: 30752|RHEA: 30754,Metrxn:68501,r0311|FACOAL160p,rxn37337|rxn37332|rxn31932|rxn31929|rxn30377|rxn08452,MNXR102341|MNXR99153,RXN-9623,HMR_2949|HMR_0217	6.2.1A2(rev)	Palmitoyl-CoA	1467867611	C00154	CCCCCCCCCCCCCCCC(=O)SCCN=C(CCN=C(C(C(COP(=O)(OP(=O)(OCC1OC(C(C1OP(=O)(O)O)O)n1cnc2c1ncnc2N)O)O)(C)C)O)O)O	3-Oxo-4(R),8-dimethyl-nonanoyl-CoA	1469256080					CC(CCCC(C(=O)CC(=O)SCCN=C(CCN=C(C(C(COP(=O)(OP(=O)(OCC1OC(C(C1OP(=O)(O)O)O)n1cnc2c1ncnc2N)O)O)(C)C)O)O)O)C)C	1
O95573	ACSL3_HUMAN	6.2.1.3	1569669203	R01280,30751|RHEA: 30752|RHEA: 30754,Metrxn:68501,r0311|FACOAL160p,rxn37337|rxn37332|rxn31932|rxn31929|rxn30377|rxn08452,MNXR102341|MNXR99153,RXN-9623,HMR_2949|HMR_0217	6.2.1A2(rev)	Palmitoyl-CoA	1467867611	C00154	CCCCCCCCCCCCCCCC(=O)SCCN=C(CCN=C(C(C(COP(=O)(OP(=O)(OCC1OC(C(C1OP(=O)(O)O)O)n1cnc2c1ncnc2N)O)O)(C)C)O)O)O	3(S)-Hydroxy-4(R),8-dimethyl-nonanoyl-CoA	1469256092					CC(CCCC(C(CC(=O)SCCN=C(CCN=C(C(C(COP(=O)(OP(=O)(OCC1OC(C(C1OP(=O)(O)O)O)n1cnc2c1ncnc2N)O)O)(C)C)O)O)O)O)C)C	1
O95573	ACSL3_HUMAN	6.2.1.3	1569669203	R01280,30751|RHEA: 30752|RHEA: 30754,Metrxn:68501,r0311|FACOAL160p,rxn37337|rxn37332|rxn31932|rxn31929|rxn30377|rxn08452,MNXR102341|MNXR99153,RXN-9623,HMR_2949|HMR_0217	6.2.1A2(rev)	Palmitoyl-CoA	1467867611	C00154	CCCCCCCCCCCCCCCC(=O)SCCN=C(CCN=C(C(C(COP(=O)(OP(=O)(OCC1OC(C(C1OP(=O)(O)O)O)n1cnc2c1ncnc2N)O)O)(C)C)O)O)O	trans,cis,cis,cis,cis-2,10,13,16,19-Docosapentaenoyl-CoA	1469256522					CCC=CCC=CCC=CCC=CCCCCCCC=CC(=O)SCCN=C(CCN=C(C(C(COP(=O)(OP(=O)(OCC1OC(C(C1OP(=O)(O)O)O)n1cnc2c1ncnc2N)O)O)(C)C)O)O)O	1
O95573	ACSL3_HUMAN	6.2.1.3	1569669203	R01280,30751|RHEA: 30752|RHEA: 30754,Metrxn:68501,r0311|FACOAL160p,rxn37337|rxn37332|rxn31932|rxn31929|rxn30377|rxn08452,MNXR102341|MNXR99153,RXN-9623,HMR_2949|HMR_0217	6.2.1A2(rev)	Palmitoyl-CoA	1467867611	C00154	CCCCCCCCCCCCCCCC(=O)SCCN=C(CCN=C(C(C(COP(=O)(OP(=O)(OCC1OC(C(C1OP(=O)(O)O)O)n1cnc2c1ncnc2N)O)O)(C)C)O)O)O	(7Z,10Z,13Z,16Z,19Z)-3-oxodocosapentaenoyl-CoA	1468285578				FDB030455|Abalone; Abiyuch; Acerola; Acorn; Adzuki bean; Agar; Agave; Alaska blueberry; Alaska wild rhubarb; Alfalfa; Allium (Onion); Allspice; Almond; Alpine sweetvetch; Amaranth; American butterfish; American cranberry; American pokeweed; Angelica; Anise; Annual wild rice; Apple; Apricot; Arctic blackberry; Arrowhead; Arrowroot; Asian pear; Asparagus; Atlantic herring; Avocado; Babassu palm; Ba…	CCC=CCC=CCC=CCC=CCC=CCCCC(=O)CC(=O)SCCN=C(CCN=C(C(C(COP(=O)(OP(=O)(OCC1OC(C(C1OP(=O)(O)O)O)n1cnc2c1ncnc2N)O)O)(C)C)O)O)O	1
O95573	ACSL3_HUMAN	6.2.1.3	1569669203	R01280,30751|RHEA: 30752|RHEA: 30754,Metrxn:68501,r0311|FACOAL160p,rxn37337|rxn37332|rxn31932|rxn31929|rxn30377|rxn08452,MNXR102341|MNXR99153,RXN-9623,HMR_2949|HMR_0217	6.2.1A2(rev)	Palmitoyl-CoA	1467867611	C00154	CCCCCCCCCCCCCCCC(=O)SCCN=C(CCN=C(C(C(COP(=O)(OP(=O)(OCC1OC(C(C1OP(=O)(O)O)O)n1cnc2c1ncnc2N)O)O)(C)C)O)O)O	(9Z,12Z,15Z,18Z,21Z)-3-oxotetracosapentaenoyl-CoA	1468285626					CCC=CCC=CCC=CCC=CCC=CCCCCCC(=O)CC(=O)SCCN=C(CCN=C(C(C(COP(=O)(OP(=O)(OCC1OC(C(C1OP(=O)(O)O)O)n1cnc2c1ncnc2N)O)O)(C)C)O)O)O	1
O95573	ACSL3_HUMAN	6.2.1.3	1569669203	R01280,30751|RHEA: 30752|RHEA: 30754,Metrxn:68501,r0311|FACOAL160p,rxn37337|rxn37332|rxn31932|rxn31929|rxn30377|rxn08452,MNXR102341|MNXR99153,RXN-9623,HMR_2949|HMR_0217	6.2.1A2(rev)	Palmitoyl-CoA	1467867611	C00154	CCCCCCCCCCCCCCCC(=O)SCCN=C(CCN=C(C(C(COP(=O)(OP(=O)(OCC1OC(C(C1OP(=O)(O)O)O)n1cnc2c1ncnc2N)O)O)(C)C)O)O)O	(3R,7Z,10Z,13Z,16Z,19Z)-3-hydroxydocosapentaenoyl-CoA	1468302861				FDB030428|Abalone; Abiyuch; Acerola; Acorn; Adzuki bean; Agar; Agave; Alaska blueberry; Alaska wild rhubarb; Alfalfa; Allium (Onion); Allspice; Almond; Alpine sweetvetch; Amaranth; American butterfish; American cranberry; American pokeweed; Angelica; Anise; Annual wild rice; Apple; Apricot; Arctic blackberry; Arrowhead; Arrowroot; Asian pear; Asparagus; Atlantic herring; Avocado; Babassu palm; Ba…	CCC=CCC=CCC=CCC=CCC=CCCCC(CC(=O)SCCN=C(CCN=C(C(C(COP(=O)(OP(=O)(OCC1OC(C(C1OP(=O)(O)O)O)n1cnc2c1ncnc2N)O)O)(C)C)O)O)O)O	1
O95573	ACSL3_HUMAN	6.2.1.3	1569669203	R01280,30751|RHEA: 30752|RHEA: 30754,Metrxn:68501,r0311|FACOAL160p,rxn37337|rxn37332|rxn31932|rxn31929|rxn30377|rxn08452,MNXR102341|MNXR99153,RXN-9623,HMR_2949|HMR_0217	6.2.1A2(rev)	Palmitoyl-CoA	1467867611	C00154	CCCCCCCCCCCCCCCC(=O)SCCN=C(CCN=C(C(C(COP(=O)(OP(=O)(OCC1OC(C(C1OP(=O)(O)O)O)n1cnc2c1ncnc2N)O)O)(C)C)O)O)O	3-Oxo-4-methyl-pentanoyl-CoA	1469255735					O=C(CC(=O)C(C)C)SCCN=C(CCN=C(C(C(COP(=O)(OP(=O)(OCC1OC(C(C1OP(=O)(O)O)O)n1cnc2c1ncnc2N)O)O)(C)C)O)O)O	1
O95573	ACSL3_HUMAN	6.2.1.3	1569669203	R01280,30751|RHEA: 30752|RHEA: 30754,Metrxn:68501,r0311|FACOAL160p,rxn37337|rxn37332|rxn31932|rxn31929|rxn30377|rxn08452,MNXR102341|MNXR99153,RXN-9623,HMR_2949|HMR_0217	6.2.1A2(rev)	Palmitoyl-CoA	1467867611	C00154	CCCCCCCCCCCCCCCC(=O)SCCN=C(CCN=C(C(C(COP(=O)(OP(=O)(OCC1OC(C(C1OP(=O)(O)O)O)n1cnc2c1ncnc2N)O)O)(C)C)O)O)O	trans,cis,cis,cis-2,10,13,16-Docosatetraenoyl-CoA	1469256620					CCCCCC=CCC=CCC=CCCCCCCC=CC(=O)SCCN=C(CCN=C(C(C(COP(=O)(OP(=O)(OCC1OC(C(C1OP(=O)(O)O)O)n1cnc2c1ncnc2N)O)O)(C)C)O)O)O	1
O95573	ACSL3_HUMAN	6.2.1.3	1569669203	R01280,30751|RHEA: 30752|RHEA: 30754,Metrxn:68501,r0311|FACOAL160p,rxn37337|rxn37332|rxn31932|rxn31929|rxn30377|rxn08452,MNXR102341|MNXR99153,RXN-9623,HMR_2949|HMR_0217	6.2.1A2(rev)	Palmitoyl-CoA	1467867611	C00154	CCCCCCCCCCCCCCCC(=O)SCCN=C(CCN=C(C(C(COP(=O)(OP(=O)(OCC1OC(C(C1OP(=O)(O)O)O)n1cnc2c1ncnc2N)O)O)(C)C)O)O)O	3(S)-Hydroxy-docosa-10,13,16,19-all-cis-tetraenoyl-CoA	1469256632					CCC=CCC=CCC=CCC=CCCCCCCC(CC(=O)SCCN=C(CCN=C(C(C(COP(=O)(OP(=O)(OCC1OC(C(C1OP(=O)(O)O)O)n1cnc2c1ncnc2N)O)O)(C)C)O)O)O)O	1
O95573	ACSL3_HUMAN	6.2.1.3	1569669203	R01280,30751|RHEA: 30752|RHEA: 30754,Metrxn:68501,r0311|FACOAL160p,rxn37337|rxn37332|rxn31932|rxn31929|rxn30377|rxn08452,MNXR102341|MNXR99153,RXN-9623,HMR_2949|HMR_0217	6.2.1A2(rev)	Palmitoyl-CoA	1467867611	C00154	CCCCCCCCCCCCCCCC(=O)SCCN=C(CCN=C(C(C(COP(=O)(OP(=O)(OCC1OC(C(C1OP(=O)(O)O)O)n1cnc2c1ncnc2N)O)O)(C)C)O)O)O	3(S)-Hydroxy-10,13,16-all-cis-docosatrienoyl-CoA	1469256683					CCCCCC=CCC=CCC=CCCCCCCC(CC(=O)SCCN=C(CCN=C(C(C(COP(=O)(OP(=O)(OCC1OC(C(C1OP(=O)(O)O)O)n1cnc2c1ncnc2N)O)O)(C)C)O)O)O)O	1
O95573	ACSL3_HUMAN	6.2.1.3	1569669203	R01280,30751|RHEA: 30752|RHEA: 30754,Metrxn:68501,r0311|FACOAL160p,rxn37337|rxn37332|rxn31932|rxn31929|rxn30377|rxn08452,MNXR102341|MNXR99153,RXN-9623,HMR_2949|HMR_0217	6.2.1A2(rev)	Palmitoyl-CoA	1467867611	C00154	CCCCCCCCCCCCCCCC(=O)SCCN=C(CCN=C(C(C(COP(=O)(OP(=O)(OCC1OC(C(C1OP(=O)(O)O)O)n1cnc2c1ncnc2N)O)O)(C)C)O)O)O	trans,cis,cis,cis,cis-2,12,15,18,21-Tetracosapentaenoyl-CoA	1469256796					CCC=CCC=CCC=CCC=CCCCCCCCCC=CC(=O)SCCN=C(CCN=C(C(C(COP(=O)(OP(=O)(OCC1OC(C(C1OP(=O)(O)O)O)n1cnc2c1ncnc2N)O)O)(C)C)O)O)O	1
O95573	ACSL3_HUMAN	6.2.1.3	1569669203	R01280,30751|RHEA: 30752|RHEA: 30754,Metrxn:68501,r0311|FACOAL160p,rxn37337|rxn37332|rxn31932|rxn31929|rxn30377|rxn08452,MNXR102341|MNXR99153,RXN-9623,HMR_2949|HMR_0217	6.2.1A2(rev)	Palmitoyl-CoA	1467867611	C00154	CCCCCCCCCCCCCCCC(=O)SCCN=C(CCN=C(C(C(COP(=O)(OP(=O)(OCC1OC(C(C1OP(=O)(O)O)O)n1cnc2c1ncnc2N)O)O)(C)C)O)O)O	3(S)-Hydroxy-tetracosa-12,15,18,21-all-cis-tetraenoyl-CoA	1469256938					CCC=CCC=CCC=CCC=CCCCCCCCCC(CC(=O)SCCN=C(CCN=C(C(C(COP(=O)(OP(=O)(OCC1OC(C(C1OP(=O)(O)O)O)n1cnc2c1ncnc2N)O)O)(C)C)O)O)O)O	1
O95573	ACSL3_HUMAN	6.2.1.3	1569818701	33615|RHEA: 33616,Metrxn:127777,OCDCAFATPc|FACOAL180,rxn37341|rxn37338|rxn37333|rxn37328|rxn09449|rxn08454,MNXR102141|MNXR99164,RXN-16380,HMR_2957|HMR_0249	6.2.1A2(rev)	Stearoyl-CoA	1467870680	C00412	CCCCCCCCCCCCCCCCCC(=O)SCCNC(=O)CCNC(=O)C(C(COP(=O)(OP(=O)(OCC1OC(C(C1OP(=O)(O)O)O)n1cnc2c1ncnc2N)O)O)(C)C)O	Stearoyl-CoA	1467870680	C00412			FDB022431|Abalone; Abiyuch; Acerola; Acorn; Adzuki bean; Agar; Agave; Alaska blueberry; Alaska wild rhubarb; Alfalfa; Allium (Onion); Allspice; Almond; Alpine sweetvetch; Amaranth; American butterfish; American cranberry; American pokeweed; Angelica; Anise; Annual wild rice; Apple; Apricot; Arctic blackberry; Arrowhead; Arrowroot; Asian pear; Asparagus; Atlantic herring; Avocado; Babassu palm; Ba…	CCCCCCCCCCCCCCCCCC(=O)SCCNC(=O)CCNC(=O)C(C(COP(=O)(OP(=O)(OCC1OC(C(C1OP(=O)(O)O)O)n1cnc2c1ncnc2N)O)O)(C)C)O	1
O95573	ACSL3_HUMAN	6.2.1.3	1569818701	33615|RHEA: 33616,Metrxn:127777,OCDCAFATPc|FACOAL180,rxn37341|rxn37338|rxn37333|rxn37328|rxn09449|rxn08454,MNXR102141|MNXR99164,RXN-16380,HMR_2957|HMR_0249	6.2.1A2(rev)	Stearoyl-CoA	1467870680	C00412	CCCCCCCCCCCCCCCCCC(=O)SCCNC(=O)CCNC(=O)C(C(COP(=O)(OP(=O)(OCC1OC(C(C1OP(=O)(O)O)O)n1cnc2c1ncnc2N)O)O)(C)C)O	Oleoyl-CoA	1467871766	C00510			FDB022554|Abalone; Abiyuch; Acerola; Acorn; Adzuki bean; Agar; Agave; Alaska blueberry; Alaska wild rhubarb; Alfalfa; Allium (Onion); Allspice; Almond; Alpine sweetvetch; Amaranth; American butterfish; American cranberry; American pokeweed; Angelica; Anise; Annual wild rice; Apple; Apricot; Arctic blackberry; Arrowhead; Arrowroot; Asian pear; Asparagus; Atlantic herring; Avocado; Babassu palm; Ba…	CCCCCCCCC=CCCCCCCCC(=O)SCCNC(=O)CCNC(=O)C(C(COP(=O)(OP(=O)(OCC1OC(C(C1OP(=O)(O)O)O)n1cnc2c1ncnc2N)O)O)(C)C)O	1
O95573	ACSL3_HUMAN	6.2.1.3	1569818701	33615|RHEA: 33616,Metrxn:127777,OCDCAFATPc|FACOAL180,rxn37341|rxn37338|rxn37333|rxn37328|rxn09449|rxn08454,MNXR102141|MNXR99164,RXN-16380,HMR_2957|HMR_0249	6.2.1A2(rev)	Stearoyl-CoA	1467870680	C00412	CCCCCCCCCCCCCCCCCC(=O)SCCNC(=O)CCNC(=O)C(C(COP(=O)(OP(=O)(OCC1OC(C(C1OP(=O)(O)O)O)n1cnc2c1ncnc2N)O)O)(C)C)O	Benzoyl-CoA	1467871797	C00512			FDB022929|Abalone; Abiyuch; Acerola; Acorn; Adzuki bean; Agar; Agave; Alaska blueberry; Alaska wild rhubarb; Alfalfa; Allium (Onion); Allspice; Almond; Alpine sweetvetch; Amaranth; American butterfish; American cranberry; American pokeweed; Angelica; Anise; Annual wild rice; Apple; Apricot; Arctic blackberry; Arrowhead; Arrowroot; Asian pear; Asparagus; Atlantic herring; Avocado; Babassu palm; Ba…	O=C(NCCSC(=O)c1ccccc1)CCNC(=O)C(C(COP(=O)(OP(=O)(OCC1OC(C(C1OP(=O)(O)O)O)n1cnc2c1ncnc2N)O)O)(C)C)O	1
O95573	ACSL3_HUMAN	6.2.1.3	1569818701	33615|RHEA: 33616,Metrxn:127777,OCDCAFATPc|FACOAL180,rxn37341|rxn37338|rxn37333|rxn37328|rxn09449|rxn08454,MNXR102141|MNXR99164,RXN-16380,HMR_2957|HMR_0249	6.2.1A2(rev)	Stearoyl-CoA	1467870680	C00412	CCCCCCCCCCCCCCCCCC(=O)SCCNC(=O)CCNC(=O)C(C(COP(=O)(OP(=O)(OCC1OC(C(C1OP(=O)(O)O)O)n1cnc2c1ncnc2N)O)O)(C)C)O	Itaconyl-CoA	1467872008	C00531			FDB023158|Abalone; Abiyuch; Acerola; Acorn; Adzuki bean; Agar; Agave; Alaska blueberry; Alaska wild rhubarb; Alfalfa; Allium (Onion); Allspice; Almond; Alpine sweetvetch; Amaranth; American butterfish; American cranberry; American pokeweed; Angelica; Anise; Annual wild rice; Apple; Apricot; Arctic blackberry; Arrowhead; Arrowroot; Asian pear; Asparagus; Atlantic herring; Avocado; Babassu palm; Ba…	O=C(NCCSC(=O)CC(=C)C(=O)O)CCNC(=O)C(C(COP(=O)(OP(=O)(OCC1OC(C(C1OP(=O)(O)O)O)n1cnc2c1ncnc2N)O)O)(C)C)O	1
O95573	ACSL3_HUMAN	6.2.1.3	1569818701	33615|RHEA: 33616,Metrxn:127777,OCDCAFATPc|FACOAL180,rxn37341|rxn37338|rxn37333|rxn37328|rxn09449|rxn08454,MNXR102141|MNXR99164,RXN-16380,HMR_2957|HMR_0249	6.2.1A2(rev)	Stearoyl-CoA	1467870680	C00412	CCCCCCCCCCCCCCCCCC(=O)SCCNC(=O)CCNC(=O)C(C(COP(=O)(OP(=O)(OCC1OC(C(C1OP(=O)(O)O)O)n1cnc2c1ncnc2N)O)O)(C)C)O	Propenoyl-CoA	1467875744	C00894			FDB022958|Abalone; Abiyuch; Acerola; Acorn; Adzuki bean; Agar; Agave; Alaska blueberry; Alaska wild rhubarb; Alfalfa; Allium (Onion); Allspice; Almond; Alpine sweetvetch; Amaranth; American butterfish; American cranberry; American pokeweed; Angelica; Anise; Annual wild rice; Apple; Apricot; Arctic blackberry; Arrowhead; Arrowroot; Asian pear; Asparagus; Atlantic herring; Avocado; Babassu palm; Ba…	C=CC(=O)SCCNC(=O)CCNC(=O)C(C(COP(=O)(OP(=O)(OCC1OC(C(C1OP(=O)(O)O)O)n1cnc2c1ncnc2N)O)O)(C)C)O	1
O95573	ACSL3_HUMAN	6.2.1.3	1569818701	33615|RHEA: 33616,Metrxn:127777,OCDCAFATPc|FACOAL180,rxn37341|rxn37338|rxn37333|rxn37328|rxn09449|rxn08454,MNXR102141|MNXR99164,RXN-16380,HMR_2957|HMR_0249	6.2.1A2(rev)	Stearoyl-CoA	1467870680	C00412	CCCCCCCCCCCCCCCCCC(=O)SCCNC(=O)CCNC(=O)C(C(COP(=O)(OP(=O)(OCC1OC(C(C1OP(=O)(O)O)O)n1cnc2c1ncnc2N)O)O)(C)C)O	6-Carboxyhexanoyl-CoA	1467877338	C01063			FDB031120|Abalone; Abiyuch; Acerola; Acorn; Adzuki bean; Agar; Agave; Alaska blueberry; Alaska wild rhubarb; Alfalfa; Allium (Onion); Allspice; Almond; Alpine sweetvetch; Amaranth; American butterfish; American cranberry; American pokeweed; Angelica; Anise; Annual wild rice; Apple; Apricot; Arctic blackberry; Arrowhead; Arrowroot; Asian pear; Asparagus; Atlantic herring; Avocado; Babassu palm; Ba…	O=C(NCCSC(=O)CCCCCC(=O)O)CCNC(=O)C(C(COP(=O)(OP(=O)(OCC1OC(C(C1OP(=O)(O)O)O)n1cnc2c1ncnc2N)O)O)(C)C)O	1
O95573	ACSL3_HUMAN	6.2.1.3	1569818701	33615|RHEA: 33616,Metrxn:127777,OCDCAFATPc|FACOAL180,rxn37341|rxn37338|rxn37333|rxn37328|rxn09449|rxn08454,MNXR102141|MNXR99164,RXN-16380,HMR_2957|HMR_0249	6.2.1A2(rev)	Stearoyl-CoA	1467870680	C00412	CCCCCCCCCCCCCCCCCC(=O)SCCNC(=O)CCNC(=O)C(C(COP(=O)(OP(=O)(OCC1OC(C(C1OP(=O)(O)O)O)n1cnc2c1ncnc2N)O)O)(C)C)O	Glutaryl-CoA	1467871969	C00527			FDB022563|	O=C(NCCSC(=O)CCCC(=O)O)CCNC(=O)C(C(COP(=O)(OP(=O)(OCC1OC(C(C1OP(=O)(O)O)O)n1cnc2c1ncnc2N)O)O)(C)C)O	1
O95573	ACSL3_HUMAN	6.2.1.3	1569818701	33615|RHEA: 33616,Metrxn:127777,OCDCAFATPc|FACOAL180,rxn37341|rxn37338|rxn37333|rxn37328|rxn09449|rxn08454,MNXR102141|MNXR99164,RXN-16380,HMR_2957|HMR_0249	6.2.1A2(rev)	Stearoyl-CoA	1467870680	C00412	CCCCCCCCCCCCCCCCCC(=O)SCCNC(=O)CCNC(=O)C(C(COP(=O)(OP(=O)(OCC1OC(C(C1OP(=O)(O)O)O)n1cnc2c1ncnc2N)O)O)(C)C)O	Lauroyl-CoA	1467883918	C01832	DB03264,EXPT01131	CHEMBL1949898	FDB023198|Abalone; Abiyuch; Acerola; Acorn; Adzuki bean; Agar; Agave; Alaska blueberry; Alaska wild rhubarb; Alfalfa; Allium (Onion); Allspice; Almond; Alpine sweetvetch; Amaranth; American butterfish; American cranberry; American pokeweed; Angelica; Anise; Annual wild rice; Apple; Apricot; Arctic blackberry; Arrowhead; Arrowroot; Asian pear; Asparagus; Atlantic herring; Avocado; Babassu palm; Ba…	CCCCCCCCCCCC(=O)SCCNC(=O)CCNC(=O)C(C(COP(=O)(OP(=O)(OCC1OC(C(C1OP(=O)(O)O)O)n1cnc2c1ncnc2N)O)O)(C)C)O	1
O95573	ACSL3_HUMAN	6.2.1.3	1569818701	33615|RHEA: 33616,Metrxn:127777,OCDCAFATPc|FACOAL180,rxn37341|rxn37338|rxn37333|rxn37328|rxn09449|rxn08454,MNXR102141|MNXR99164,RXN-16380,HMR_2957|HMR_0249	6.2.1A2(rev)	Stearoyl-CoA	1467870680	C00412	CCCCCCCCCCCCCCCCCC(=O)SCCNC(=O)CCNC(=O)C(C(COP(=O)(OP(=O)(OCC1OC(C(C1OP(=O)(O)O)O)n1cnc2c1ncnc2N)O)O)(C)C)O	Octanoyl-CoA	1467884933	C01944		CHEMBL1949896	FDB022409|Abalone; Abiyuch; Acerola; Acorn; Adzuki bean; Agar; Agave; Alaska blueberry; Alaska wild rhubarb; Alfalfa; Allium (Onion); Allspice; Almond; Alpine sweetvetch; Amaranth; American butterfish; American cranberry; American pokeweed; Angelica; Anise; Annual wild rice; Apple; Apricot; Arctic blackberry; Arrowhead; Arrowroot; Asian pear; Asparagus; Atlantic herring; Avocado; Babassu palm; Ba…	CCCCCCCC(=O)SCCNC(=O)CCNC(=O)C(C(COP(=O)(OP(=O)(OCC1OC(C(C1OP(=O)(O)O)O)n1cnc2c1ncnc2N)O)O)(C)C)O	1
O95573	ACSL3_HUMAN	6.2.1.3	1569818701	33615|RHEA: 33616,Metrxn:127777,OCDCAFATPc|FACOAL180,rxn37341|rxn37338|rxn37333|rxn37328|rxn09449|rxn08454,MNXR102141|MNXR99164,RXN-16380,HMR_2957|HMR_0249	6.2.1A2(rev)	Stearoyl-CoA	1467870680	C00412	CCCCCCCCCCCCCCCCCC(=O)SCCNC(=O)CCNC(=O)C(C(COP(=O)(OP(=O)(OCC1OC(C(C1OP(=O)(O)O)O)n1cnc2c1ncnc2N)O)O)(C)C)O	Cinnamoyl-CoA	1467872107	C00540,C16256			FDB001607|Sorghum	O=C(NCCSC(=O)C=Cc1ccccc1)CCNC(=O)C(C(COP(=O)(OP(=O)(OCC1OC(C(C1OP(=O)(O)O)O)n1cnc2c1ncnc2N)O)O)(C)C)O	1
O95573	ACSL3_HUMAN	6.2.1.3	1569818701	33615|RHEA: 33616,Metrxn:127777,OCDCAFATPc|FACOAL180,rxn37341|rxn37338|rxn37333|rxn37328|rxn09449|rxn08454,MNXR102141|MNXR99164,RXN-16380,HMR_2957|HMR_0249	6.2.1A2(rev)	Stearoyl-CoA	1467870680	C00412	CCCCCCCCCCCCCCCCCC(=O)SCCNC(=O)CCNC(=O)C(C(COP(=O)(OP(=O)(OCC1OC(C(C1OP(=O)(O)O)O)n1cnc2c1ncnc2N)O)O)(C)C)O	Tetradecanoyl-CoA	1467889952	C02593		CHEMBL1949899	FDB022670|Abalone; Abiyuch; Acerola; Acorn; Adzuki bean; Agar; Agave; Alaska blueberry; Alaska wild rhubarb; Alfalfa; Allium (Onion); Allspice; Almond; Alpine sweetvetch; Amaranth; American butterfish; American cranberry; American pokeweed; Angelica; Anise; Annual wild rice; Apple; Apricot; Arctic blackberry; Arrowhead; Arrowroot; Asian pear; Asparagus; Atlantic herring; Avocado; Babassu palm; Ba…	CCCCCCCCCCCCCC(=O)SCCNC(=O)CCNC(=O)C(C(COP(=O)(OP(=O)(OCC1OC(C(C1OP(=O)(O)O)O)n1cnc2c1ncnc2N)O)O)(C)C)O	1
O95573	ACSL3_HUMAN	6.2.1.3	1569818701	33615|RHEA: 33616,Metrxn:127777,OCDCAFATPc|FACOAL180,rxn37341|rxn37338|rxn37333|rxn37328|rxn09449|rxn08454,MNXR102141|MNXR99164,RXN-16380,HMR_2957|HMR_0249	6.2.1A2(rev)	Stearoyl-CoA	1467870680	C00412	CCCCCCCCCCCCCCCCCC(=O)SCCNC(=O)CCNC(=O)C(C(COP(=O)(OP(=O)(OCC1OC(C(C1OP(=O)(O)O)O)n1cnc2c1ncnc2N)O)O)(C)C)O	3-Methylbutanoyl-CoA	1467892444	C02939			FDB022430|Abalone; Abiyuch; Acerola; Acorn; Adzuki bean; Agar; Agave; Alaska blueberry; Alaska wild rhubarb; Alfalfa; Allium (Onion); Allspice; Almond; Alpine sweetvetch; Amaranth; American butterfish; American cranberry; American pokeweed; Angelica; Anise; Annual wild rice; Apple; Apricot; Arctic blackberry; Arrowhead; Arrowroot; Asian pear; Asparagus; Atlantic herring; Avocado; Babassu palm; Ba…	CC(CC(=O)SCCNC(=O)CCNC(=O)C(C(COP(=O)(OP(=O)(OCC1OC(C(C1OP(=O)(O)O)O)n1cnc2c1ncnc2N)O)O)(C)C)O)C	1
O95573	ACSL3_HUMAN	6.2.1.3	1569818701	33615|RHEA: 33616,Metrxn:127777,OCDCAFATPc|FACOAL180,rxn37341|rxn37338|rxn37333|rxn37328|rxn09449|rxn08454,MNXR102141|MNXR99164,RXN-16380,HMR_2957|HMR_0249	6.2.1A2(rev)	Stearoyl-CoA	1467870680	C00412	CCCCCCCCCCCCCCCCCC(=O)SCCNC(=O)CCNC(=O)C(C(COP(=O)(OP(=O)(OCC1OC(C(C1OP(=O)(O)O)O)n1cnc2c1ncnc2N)O)O)(C)C)O	(3S)-Citryl-CoA	1467872388	C00566				O=C(NCCSC(=O)CC(C(=O)O)(CC(=O)O)O)CCNC(=O)C(C(COP(=O)(OP(=O)(OCC1OC(C(C1OP(=O)(O)O)O)n1cnc2c1ncnc2N)O)O)(C)C)O	1
O95573	ACSL3_HUMAN	6.2.1.3	1569818701	33615|RHEA: 33616,Metrxn:127777,OCDCAFATPc|FACOAL180,rxn37341|rxn37338|rxn37333|rxn37328|rxn09449|rxn08454,MNXR102141|MNXR99164,RXN-16380,HMR_2957|HMR_0249	6.2.1A2(rev)	Stearoyl-CoA	1467870680	C00412	CCCCCCCCCCCCCCCCCC(=O)SCCNC(=O)CCNC(=O)C(C(COP(=O)(OP(=O)(OCC1OC(C(C1OP(=O)(O)O)O)n1cnc2c1ncnc2N)O)O)(C)C)O	3-Methylcrotonyl-CoA	1467893475	C03069			FDB022652|Abalone; Abiyuch; Acerola; Acorn; Adzuki bean; Agar; Agave; Alaska blueberry; Alaska wild rhubarb; Alfalfa; Allium (Onion); Allspice; Almond; Alpine sweetvetch; Amaranth; American butterfish; American cranberry; American pokeweed; Angelica; Anise; Annual wild rice; Apple; Apricot; Arctic blackberry; Arrowhead; Arrowroot; Asian pear; Asparagus; Atlantic herring; Avocado; Babassu palm; Ba…	O=C(NCCSC(=O)C=C(C)C)CCNC(=O)C(C(COP(=O)(OP(=O)(OCC1OC(C(C1OP(=O)(O)O)O)n1cnc2c1ncnc2N)O)O)(C)C)O	1
O95573	ACSL3_HUMAN	6.2.1.3	1569818701	33615|RHEA: 33616,Metrxn:127777,OCDCAFATPc|FACOAL180,rxn37341|rxn37338|rxn37333|rxn37328|rxn09449|rxn08454,MNXR102141|MNXR99164,RXN-16380,HMR_2957|HMR_0249	6.2.1A2(rev)	Stearoyl-CoA	1467870680	C00412	CCCCCCCCCCCCCCCCCC(=O)SCCNC(=O)CCNC(=O)C(C(COP(=O)(OP(=O)(OCC1OC(C(C1OP(=O)(O)O)O)n1cnc2c1ncnc2N)O)O)(C)C)O	2-Succinylbenzoyl-CoA	1467894138	C03160			FDB030478|Abalone; Abiyuch; Acerola; Acorn; Adzuki bean; Agar; Agave; Alaska blueberry; Alaska wild rhubarb; Alfalfa; Allium (Onion); Allspice; Almond; Alpine sweetvetch; Amaranth; American butterfish; American cranberry; American pokeweed; Angelica; Anise; Annual wild rice; Apple; Apricot; Arctic blackberry; Arrowhead; Arrowroot; Asian pear; Asparagus; Atlantic herring; Avocado; Babassu palm; Ba…	O=C(NCCSC(=O)CCC(=O)c1ccccc1C(=O)O)CCNC(=O)C(C(COP(=O)(OP(=O)(OCC1OC(C(C1OP(=O)(O)O)O)n1cnc2c1ncnc2N)O)O)(C)C)O	1
O95573	ACSL3_HUMAN	6.2.1.3	1569818701	33615|RHEA: 33616,Metrxn:127777,OCDCAFATPc|FACOAL180,rxn37341|rxn37338|rxn37333|rxn37328|rxn09449|rxn08454,MNXR102141|MNXR99164,RXN-16380,HMR_2957|HMR_0249	6.2.1A2(rev)	Stearoyl-CoA	1467870680	C00412	CCCCCCCCCCCCCCCCCC(=O)SCCNC(=O)CCNC(=O)C(C(COP(=O)(OP(=O)(OCC1OC(C(C1OP(=O)(O)O)O)n1cnc2c1ncnc2N)O)O)(C)C)O	Phenylacetyl-CoA	1467872545	C00582		CHEMBL3526286	FDB023945|	O=C(NCCSC(=O)Cc1ccccc1)CCNC(=O)C(C(COP(=O)(OP(=O)(OCC1OC(C(C1OP(=O)(O)O)O)n1cnc2c1ncnc2N)O)O)(C)C)O	1
O95573	ACSL3_HUMAN	6.2.1.3	1569818701	33615|RHEA: 33616,Metrxn:127777,OCDCAFATPc|FACOAL180,rxn37341|rxn37338|rxn37333|rxn37328|rxn09449|rxn08454,MNXR102141|MNXR99164,RXN-16380,HMR_2957|HMR_0249	6.2.1A2(rev)	Stearoyl-CoA	1467870680	C00412	CCCCCCCCCCCCCCCCCC(=O)SCCNC(=O)CCNC(=O)C(C(COP(=O)(OP(=O)(OCC1OC(C(C1OP(=O)(O)O)O)n1cnc2c1ncnc2N)O)O)(C)C)O	3-Methylglutaconyl-CoA	1467894732	C03231			FDB022396|Abalone; Abiyuch; Acerola; Acorn; Adzuki bean; Agar; Agave; Alaska blueberry; Alaska wild rhubarb; Alfalfa; Allium (Onion); Allspice; Almond; Alpine sweetvetch; Amaranth; American butterfish; American cranberry; American pokeweed; Angelica; Anise; Annual wild rice; Apple; Apricot; Arctic blackberry; Arrowhead; Arrowroot; Asian pear; Asparagus; Atlantic herring; Avocado; Babassu palm; Ba…	O=C(NCCSC(=O)C=C(CC(=O)O)C)CCNC(=O)C(C(COP(=O)(OP(=O)(OCC1OC(C(C1OP(=O)(O)O)O)n1cnc2c1ncnc2N)O)O)(C)C)O	1
O95573	ACSL3_HUMAN	6.2.1.3	1569818701	33615|RHEA: 33616,Metrxn:127777,OCDCAFATPc|FACOAL180,rxn37341|rxn37338|rxn37333|rxn37328|rxn09449|rxn08454,MNXR102141|MNXR99164,RXN-16380,HMR_2957|HMR_0249	6.2.1A2(rev)	Stearoyl-CoA	1467870680	C00412	CCCCCCCCCCCCCCCCCC(=O)SCCNC(=O)CCNC(=O)C(C(COP(=O)(OP(=O)(OCC1OC(C(C1OP(=O)(O)O)O)n1cnc2c1ncnc2N)O)O)(C)C)O	2-Methylacetoacetyl-CoA	1467895458	C03344			FDB022455|Abalone; Abiyuch; Acerola; Acorn; Adzuki bean; Agar; Agave; Alaska blueberry; Alaska wild rhubarb; Alfalfa; Allium (Onion); Allspice; Almond; Alpine sweetvetch; Amaranth; American butterfish; American cranberry; American pokeweed; Angelica; Anise; Annual wild rice; Apple; Apricot; Arctic blackberry; Arrowhead; Arrowroot; Asian pear; Asparagus; Atlantic herring; Avocado; Babassu palm; Ba…	O=C(NCCSC(=O)C(C(=O)C)C)CCNC(=O)C(C(COP(=O)(OP(=O)(OCC1OC(C(C1OP(=O)(O)O)O)n1cnc2c1ncnc2N)O)O)(C)C)O	1
O95573	ACSL3_HUMAN	6.2.1.3	1569818701	33615|RHEA: 33616,Metrxn:127777,OCDCAFATPc|FACOAL180,rxn37341|rxn37338|rxn37333|rxn37328|rxn09449|rxn08454,MNXR102141|MNXR99164,RXN-16380,HMR_2957|HMR_0249	6.2.1A2(rev)	Stearoyl-CoA	1467870680	C00412	CCCCCCCCCCCCCCCCCC(=O)SCCNC(=O)CCNC(=O)C(C(COP(=O)(OP(=O)(OCC1OC(C(C1OP(=O)(O)O)O)n1cnc2c1ncnc2N)O)O)(C)C)O	2-Methylpropanoyl-CoA	1467872984	C00630			FDB022419|	O=C(NCCSC(=O)C(C)C)CCNC(=O)C(C(COP(=O)(OP(=O)(OCC1OC(C(C1OP(=O)(O)O)O)n1cnc2c1ncnc2N)O)O)(C)C)O	1
O95573	ACSL3_HUMAN	6.2.1.3	1569818701	33615|RHEA: 33616,Metrxn:127777,OCDCAFATPc|FACOAL180,rxn37341|rxn37338|rxn37333|rxn37328|rxn09449|rxn08454,MNXR102141|MNXR99164,RXN-16380,HMR_2957|HMR_0249	6.2.1A2(rev)	Stearoyl-CoA	1467870680	C00412	CCCCCCCCCCCCCCCCCC(=O)SCCNC(=O)CCNC(=O)C(C(COP(=O)(OP(=O)(OCC1OC(C(C1OP(=O)(O)O)O)n1cnc2c1ncnc2N)O)O)(C)C)O	(2S,3S)-3-Hydroxy-2-methylbutanoyl-CoA	1467902742	C04405			FDB022575|Abalone; Abiyuch; Acerola; Acorn; Adzuki bean; Agar; Agave; Alaska blueberry; Alaska wild rhubarb; Alfalfa; Allium (Onion); Allspice; Almond; Alpine sweetvetch; Amaranth; American butterfish; American cranberry; American pokeweed; Angelica; Anise; Annual wild rice; Apple; Apricot; Arctic blackberry; Arrowhead; Arrowroot; Asian pear; Asparagus; Atlantic herring; Avocado; Babassu palm; Ba…	O=C(NCCSC(=O)C(C(O)C)C)CCNC(=O)C(C(COP(=O)(OP(=O)(OCC1OC(C(C1OP(=O)(O)O)O)n1cnc2c1ncnc2N)O)O)(C)C)O	1
O95573	ACSL3_HUMAN	6.2.1.3	1569818701	33615|RHEA: 33616,Metrxn:127777,OCDCAFATPc|FACOAL180,rxn37341|rxn37338|rxn37333|rxn37328|rxn09449|rxn08454,MNXR102141|MNXR99164,RXN-16380,HMR_2957|HMR_0249	6.2.1A2(rev)	Stearoyl-CoA	1467870680	C00412	CCCCCCCCCCCCCCCCCC(=O)SCCNC(=O)CCNC(=O)C(C(COP(=O)(OP(=O)(OCC1OC(C(C1OP(=O)(O)O)O)n1cnc2c1ncnc2N)O)O)(C)C)O	3-Oxodecanoyl-CoA	1467908051	C05265			FDB023258|Abalone; Abiyuch; Acerola; Acorn; Adzuki bean; Agar; Agave; Alaska blueberry; Alaska wild rhubarb; Alfalfa; Allium (Onion); Allspice; Almond; Alpine sweetvetch; Amaranth; American butterfish; American cranberry; American pokeweed; Angelica; Anise; Annual wild rice; Apple; Apricot; Arctic blackberry; Arrowhead; Arrowroot; Asian pear; Asparagus; Atlantic herring; Avocado; Babassu palm; Ba…	CCCCCCCC(=O)CC(=O)SCCNC(=O)CCNC(=O)C(C(COP(=O)(OP(=O)(OCC1OC(C(C1OP(=O)(O)O)O)n1cnc2c1ncnc2N)O)O)(C)C)O	1
O95573	ACSL3_HUMAN	6.2.1.3	1569818701	33615|RHEA: 33616,Metrxn:127777,OCDCAFATPc|FACOAL180,rxn37341|rxn37338|rxn37333|rxn37328|rxn09449|rxn08454,MNXR102141|MNXR99164,RXN-16380,HMR_2957|HMR_0249	6.2.1A2(rev)	Stearoyl-CoA	1467870680	C00412	CCCCCCCCCCCCCCCCCC(=O)SCCNC(=O)CCNC(=O)C(C(COP(=O)(OP(=O)(OCC1OC(C(C1OP(=O)(O)O)O)n1cnc2c1ncnc2N)O)O)(C)C)O	(S)-Methylmalonyl-CoA	1467873516	C00683,C01213,C02557			FDB022523|	O=C(NCCSC(=O)C(C(=O)O)C)CCNC(=O)C(C(COP(=O)(OP(=O)(OCC1OC(C(C1OP(=O)(O)O)O)n1cnc2c1ncnc2N)O)O)(C)C)O	1
O95573	ACSL3_HUMAN	6.2.1.3	1569818701	33615|RHEA: 33616,Metrxn:127777,OCDCAFATPc|FACOAL180,rxn37341|rxn37338|rxn37333|rxn37328|rxn09449|rxn08454,MNXR102141|MNXR99164,RXN-16380,HMR_2957|HMR_0249	6.2.1A2(rev)	Stearoyl-CoA	1467870680	C00412	CCCCCCCCCCCCCCCCCC(=O)SCCNC(=O)CCNC(=O)C(C(COP(=O)(OP(=O)(OCC1OC(C(C1OP(=O)(O)O)O)n1cnc2c1ncnc2N)O)O)(C)C)O	3-Oxohexanoyl-CoA	1467908099	C05269			FDB023262|Abalone; Abiyuch; Acerola; Acorn; Adzuki bean; Agar; Agave; Alaska blueberry; Alaska wild rhubarb; Alfalfa; Allium (Onion); Allspice; Almond; Alpine sweetvetch; Amaranth; American butterfish; American cranberry; American pokeweed; Angelica; Anise; Annual wild rice; Apple; Apricot; Arctic blackberry; Arrowhead; Arrowroot; Asian pear; Asparagus; Atlantic herring; Avocado; Babassu palm; Ba…	CCCC(=O)CC(=O)SCCNC(=O)CCNC(=O)C(C(COP(=O)(OP(=O)(OCC1OC(C(C1OP(=O)(O)O)O)n1cnc2c1ncnc2N)O)O)(C)C)O	1
O95573	ACSL3_HUMAN	6.2.1.3	1569818701	33615|RHEA: 33616,Metrxn:127777,OCDCAFATPc|FACOAL180,rxn37341|rxn37338|rxn37333|rxn37328|rxn09449|rxn08454,MNXR102141|MNXR99164,RXN-16380,HMR_2957|HMR_0249	6.2.1A2(rev)	Stearoyl-CoA	1467870680	C00412	CCCCCCCCCCCCCCCCCC(=O)SCCNC(=O)CCNC(=O)C(C(COP(=O)(OP(=O)(OCC1OC(C(C1OP(=O)(O)O)O)n1cnc2c1ncnc2N)O)O)(C)C)O	trans-Oct-2-enoyl-CoA	1467908186	C05276			FDB023268|Abalone; Abiyuch; Acerola; Acorn; Adzuki bean; Agar; Agave; Alaska blueberry; Alaska wild rhubarb; Alfalfa; Allium (Onion); Allspice; Almond; Alpine sweetvetch; Amaranth; American butterfish; American cranberry; American pokeweed; Angelica; Anise; Annual wild rice; Apple; Apricot; Arctic blackberry; Arrowhead; Arrowroot; Asian pear; Asparagus; Atlantic herring; Avocado; Babassu palm; Ba…	CCCCCC=CC(=O)SCCNC(=O)CCNC(=O)C(C(COP(=O)(OP(=O)(OCC1OC(C(C1OP(=O)(O)O)O)n1cnc2c1ncnc2N)O)O)(C)C)O	1
O95573	ACSL3_HUMAN	6.2.1.3	1569818701	33615|RHEA: 33616,Metrxn:127777,OCDCAFATPc|FACOAL180,rxn37341|rxn37338|rxn37333|rxn37328|rxn09449|rxn08454,MNXR102141|MNXR99164,RXN-16380,HMR_2957|HMR_0249	6.2.1A2(rev)	Stearoyl-CoA	1467870680	C00412	CCCCCCCCCCCCCCCCCC(=O)SCCNC(=O)CCNC(=O)C(C(COP(=O)(OP(=O)(OCC1OC(C(C1OP(=O)(O)O)O)n1cnc2c1ncnc2N)O)O)(C)C)O	Lactoyl-CoA	1467875034	C00827			FDB022973|	O=C(NCCSC(=O)C(O)C)CCNC(=O)C(C(COP(=O)(OP(=O)(OCC1OC(C(C1OP(=O)(O)O)O)n1cnc2c1ncnc2N)O)O)(C)C)O	1
O95573	ACSL3_HUMAN	6.2.1.3	1569818701	33615|RHEA: 33616,Metrxn:127777,OCDCAFATPc|FACOAL180,rxn37341|rxn37338|rxn37333|rxn37328|rxn09449|rxn08454,MNXR102141|MNXR99164,RXN-16380,HMR_2957|HMR_0249	6.2.1A2(rev)	Stearoyl-CoA	1467870680	C00412	CCCCCCCCCCCCCCCCCC(=O)SCCNC(=O)CCNC(=O)C(C(COP(=O)(OP(=O)(OCC1OC(C(C1OP(=O)(O)O)O)n1cnc2c1ncnc2N)O)O)(C)C)O	N-Methylanthraniloyl-CoA	1467976983	C12092			FDB031041|Abalone; Abiyuch; Acerola; Acorn; Adzuki bean; Agar; Agave; Alaska blueberry; Alaska wild rhubarb; Alfalfa; Allium (Onion); Allspice; Almond; Alpine sweetvetch; Amaranth; American butterfish; American cranberry; American pokeweed; Angelica; Anise; Annual wild rice; Apple; Apricot; Arctic blackberry; Arrowhead; Arrowroot; Asian pear; Asparagus; Atlantic herring; Avocado; Babassu palm; Ba…	CNc1ccccc1C(=O)SCCNC(=O)CCNC(=O)C(C(COP(=O)(OP(=O)(OCC1OC(C(C1OP(=O)(O)O)O)n1cnc2c1ncnc2N)O)O)(C)C)O	1
O95573	ACSL3_HUMAN	6.2.1.3	1569818701	33615|RHEA: 33616,Metrxn:127777,OCDCAFATPc|FACOAL180,rxn37341|rxn37338|rxn37333|rxn37328|rxn09449|rxn08454,MNXR102141|MNXR99164,RXN-16380,HMR_2957|HMR_0249	6.2.1A2(rev)	Stearoyl-CoA	1467870680	C00412	CCCCCCCCCCCCCCCCCC(=O)SCCNC(=O)CCNC(=O)C(C(COP(=O)(OP(=O)(OCC1OC(C(C1OP(=O)(O)O)O)n1cnc2c1ncnc2N)O)O)(C)C)O	5-Hydroxyferuloyl-CoA	1467978174	C12203		ChEMBLE_NTD	FDB030572|Abalone; Abiyuch; Acerola; Acorn; Adzuki bean; Agar; Agave; Alaska blueberry; Alaska wild rhubarb; Alfalfa; Allium (Onion); Allspice; Almond; Alpine sweetvetch; Amaranth; American butterfish; American cranberry; American pokeweed; Angelica; Anise; Annual wild rice; Apple; Apricot; Arctic blackberry; Arrowhead; Arrowroot; Asian pear; Asparagus; Atlantic herring; Avocado; Babassu palm; Ba…	COc1cc(C=CC(=O)SCCNC(=O)CCNC(=O)C(C(COP(=O)(OP(=O)(OCC2OC(C(C2OP(=O)(O)O)O)n2cnc3c2ncnc3N)O)O)(C)C)O)cc(c1O)O	1
O95573	ACSL3_HUMAN	6.2.1.3	1569818701	33615|RHEA: 33616,Metrxn:127777,OCDCAFATPc|FACOAL180,rxn37341|rxn37338|rxn37333|rxn37328|rxn09449|rxn08454,MNXR102141|MNXR99164,RXN-16380,HMR_2957|HMR_0249	6.2.1A2(rev)	Stearoyl-CoA	1467870680	C00412	CCCCCCCCCCCCCCCCCC(=O)SCCNC(=O)CCNC(=O)C(C(COP(=O)(OP(=O)(OCC1OC(C(C1OP(=O)(O)O)O)n1cnc2c1ncnc2N)O)O)(C)C)O	2-Furoyl-CoA	1467875225	C00845				O=C(NCCSC(=O)c1ccco1)CCNC(=O)C(C(COP(=O)(OP(=O)(OCC1OC(C(C1OP(=O)(O)O)O)n1cnc2c1ncnc2N)O)O)(C)C)O	1
O95573	ACSL3_HUMAN	6.2.1.3	1569818701	33615|RHEA: 33616,Metrxn:127777,OCDCAFATPc|FACOAL180,rxn37341|rxn37338|rxn37333|rxn37328|rxn09449|rxn08454,MNXR102141|MNXR99164,RXN-16380,HMR_2957|HMR_0249	6.2.1A2(rev)	Stearoyl-CoA	1467870680	C00412	CCCCCCCCCCCCCCCCCC(=O)SCCNC(=O)CCNC(=O)C(C(COP(=O)(OP(=O)(OCC1OC(C(C1OP(=O)(O)O)O)n1cnc2c1ncnc2N)O)O)(C)C)O	5-Carboxy-2-pentenoyl-CoA	1467987972	C14144			FDB030295|Abalone; Abiyuch; Acerola; Acorn; Adzuki bean; Agar; Agave; Alaska blueberry; Alaska wild rhubarb; Alfalfa; Allium (Onion); Allspice; Almond; Alpine sweetvetch; Amaranth; American butterfish; American cranberry; American pokeweed; Angelica; Anise; Annual wild rice; Apple; Apricot; Arctic blackberry; Arrowhead; Arrowroot; Asian pear; Asparagus; Atlantic herring; Avocado; Babassu palm; Ba…	O=C(NCCSC(=O)C=CCCC(=O)O)CCNC(=O)C(C(COP(=O)(OP(=O)(OCC1OC(C(C1OP(=O)(O)O)O)n1cnc2c1ncnc2N)O)O)(C)C)O	1
O95573	ACSL3_HUMAN	6.2.1.3	1569818701	33615|RHEA: 33616,Metrxn:127777,OCDCAFATPc|FACOAL180,rxn37341|rxn37338|rxn37333|rxn37328|rxn09449|rxn08454,MNXR102141|MNXR99164,RXN-16380,HMR_2957|HMR_0249	6.2.1A2(rev)	Stearoyl-CoA	1467870680	C00412	CCCCCCCCCCCCCCCCCC(=O)SCCNC(=O)CCNC(=O)C(C(COP(=O)(OP(=O)(OCC1OC(C(C1OP(=O)(O)O)O)n1cnc2c1ncnc2N)O)O)(C)C)O	1,4-Dihydroxy-2-naphthoyl-CoA	1468002384	C15547			FDB030192|Abalone; Abiyuch; Acerola; Acorn; Adzuki bean; Agar; Agave; Alaska blueberry; Alaska wild rhubarb; Alfalfa; Allium (Onion); Allspice; Almond; Alpine sweetvetch; Amaranth; American butterfish; American cranberry; American pokeweed; Angelica; Anise; Annual wild rice; Apple; Apricot; Arctic blackberry; Arrowhead; Arrowroot; Asian pear; Asparagus; Atlantic herring; Avocado; Babassu palm; Ba…	O=C(NCCSC(=O)c1cc(O)c2c(c1O)cccc2)CCNC(=O)C(C(COP(=O)(OP(=O)(OCC1OC(C(C1OP(=O)(O)O)O)n1cnc2c1ncnc2N)O)O)(C)C)O	1
O95573	ACSL3_HUMAN	6.2.1.3	1569818701	33615|RHEA: 33616,Metrxn:127777,OCDCAFATPc|FACOAL180,rxn37341|rxn37338|rxn37333|rxn37328|rxn09449|rxn08454,MNXR102141|MNXR99164,RXN-16380,HMR_2957|HMR_0249	6.2.1A2(rev)	Stearoyl-CoA	1467870680	C00412	CCCCCCCCCCCCCCCCCC(=O)SCCNC(=O)CCNC(=O)C(C(COP(=O)(OP(=O)(OCC1OC(C(C1OP(=O)(O)O)O)n1cnc2c1ncnc2N)O)O)(C)C)O	Crotonoyl-CoA	1467875551	C00877		CHEMBL1213378	FDB022792|	CC=CC(=O)SCCNC(=O)CCNC(=O)C(C(COP(=O)(OP(=O)(OCC1OC(C(C1OP(=O)(O)O)O)n1cnc2c1ncnc2N)O)O)(C)C)O	1
O95573	ACSL3_HUMAN	6.2.1.3	1569818701	33615|RHEA: 33616,Metrxn:127777,OCDCAFATPc|FACOAL180,rxn37341|rxn37338|rxn37333|rxn37328|rxn09449|rxn08454,MNXR102141|MNXR99164,RXN-16380,HMR_2957|HMR_0249	6.2.1A2(rev)	Stearoyl-CoA	1467870680	C00412	CCCCCCCCCCCCCCCCCC(=O)SCCNC(=O)CCNC(=O)C(C(COP(=O)(OP(=O)(OCC1OC(C(C1OP(=O)(O)O)O)n1cnc2c1ncnc2N)O)O)(C)C)O	(2E)-Octadecenoyl-CoA	1468008283	C16218			FDB023960|Abalone; Abiyuch; Acerola; Acorn; Adzuki bean; Agar; Agave; Alaska blueberry; Alaska wild rhubarb; Alfalfa; Allium (Onion); Allspice; Almond; Alpine sweetvetch; Amaranth; American butterfish; American cranberry; American pokeweed; Angelica; Anise; Annual wild rice; Apple; Apricot; Arctic blackberry; Arrowhead; Arrowroot; Asian pear; Asparagus; Atlantic herring; Avocado; Babassu palm; Ba…	CCCCCCCCCCCCCCCC=CC(=O)SCCNC(=O)CCNC(=O)C(C(COP(=O)(OP(=O)(OCC1OC(C(C1OP(=O)(O)O)O)n1cnc2c1ncnc2N)O)O)(C)C)O	1
O95573	ACSL3_HUMAN	6.2.1.3	1569818701	33615|RHEA: 33616,Metrxn:127777,OCDCAFATPc|FACOAL180,rxn37341|rxn37338|rxn37333|rxn37328|rxn09449|rxn08454,MNXR102141|MNXR99164,RXN-16380,HMR_2957|HMR_0249	6.2.1A2(rev)	Stearoyl-CoA	1467870680	C00412	CCCCCCCCCCCCCCCCCC(=O)SCCNC(=O)CCNC(=O)C(C(COP(=O)(OP(=O)(OCC1OC(C(C1OP(=O)(O)O)O)n1cnc2c1ncnc2N)O)O)(C)C)O	(+)-7-Isojasmonic acid CoA	1468009486	C16339			FDB030948|Abalone; Abiyuch; Acerola; Acorn; Adzuki bean; Agar; Agave; Alaska blueberry; Alaska wild rhubarb; Alfalfa; Allium (Onion); Allspice; Almond; Alpine sweetvetch; Amaranth; American butterfish; American cranberry; American pokeweed; Angelica; Anise; Annual wild rice; Apple; Apricot; Arctic blackberry; Arrowhead; Arrowroot; Asian pear; Asparagus; Atlantic herring; Avocado; Babassu palm; Ba…	CCC=CCC1C(CCC1=O)CC(=O)SCCNC(=O)CCNC(=O)C(C(COP(=O)(OP(=O)(OCC1OC(C(C1OP(=O)(O)O)O)n1cnc2c1ncnc2N)O)O)(C)C)O	1
O95573	ACSL3_HUMAN	6.2.1.3	1569818701	33615|RHEA: 33616,Metrxn:127777,OCDCAFATPc|FACOAL180,rxn37341|rxn37338|rxn37333|rxn37328|rxn09449|rxn08454,MNXR102141|MNXR99164,RXN-16380,HMR_2957|HMR_0249	6.2.1A2(rev)	Stearoyl-CoA	1467870680	C00412	CCCCCCCCCCCCCCCCCC(=O)SCCNC(=O)CCNC(=O)C(C(COP(=O)(OP(=O)(OCC1OC(C(C1OP(=O)(O)O)O)n1cnc2c1ncnc2N)O)O)(C)C)O	Pentanoyl-CoA	1467875694	C00888			FDB029262|	CCCCC(=O)SCCNC(=O)CCNC(=O)C(C(COP(=O)(OP(=O)(OCC1OC(C(C1OP(=O)(O)O)O)n1cnc2c1ncnc2N)O)O)(C)C)O	1
O95573	ACSL3_HUMAN	6.2.1.3	1569818701	33615|RHEA: 33616,Metrxn:127777,OCDCAFATPc|FACOAL180,rxn37341|rxn37338|rxn37333|rxn37328|rxn09449|rxn08454,MNXR102141|MNXR99164,RXN-16380,HMR_2957|HMR_0249	6.2.1A2(rev)	Stearoyl-CoA	1467870680	C00412	CCCCCCCCCCCCCCCCCC(=O)SCCNC(=O)CCNC(=O)C(C(COP(=O)(OP(=O)(OCC1OC(C(C1OP(=O)(O)O)O)n1cnc2c1ncnc2N)O)O)(C)C)O	Tetracosenoyl-CoA	1468011314	C16532			FDB030177|Abalone; Abiyuch; Acerola; Acorn; Adzuki bean; Agar; Agave; Alaska blueberry; Alaska wild rhubarb; Alfalfa; Allium (Onion); Allspice; Almond; Alpine sweetvetch; Amaranth; American butterfish; American cranberry; American pokeweed; Angelica; Anise; Annual wild rice; Apple; Apricot; Arctic blackberry; Arrowhead; Arrowroot; Asian pear; Asparagus; Atlantic herring; Avocado; Babassu palm; Ba…	CCCCCCCCC=CCCCCCCCCCCCCCC(=O)SCCNC(=O)CCNC(=O)C(C(COP(=O)(OP(=O)(OCC1OC(C(C1OP(=O)(O)O)O)n1cnc2c1ncnc2N)O)O)(C)C)O	1
O95573	ACSL3_HUMAN	6.2.1.3	1569818701	33615|RHEA: 33616,Metrxn:127777,OCDCAFATPc|FACOAL180,rxn37341|rxn37338|rxn37333|rxn37328|rxn09449|rxn08454,MNXR102141|MNXR99164,RXN-16380,HMR_2957|HMR_0249	6.2.1A2(rev)	Stearoyl-CoA	1467870680	C00412	CCCCCCCCCCCCCCCCCC(=O)SCCNC(=O)CCNC(=O)C(C(COP(=O)(OP(=O)(OCC1OC(C(C1OP(=O)(O)O)O)n1cnc2c1ncnc2N)O)O)(C)C)O	3-Oxo-5,6-dehydrosuberyl-CoA	1468041592	C19945			FDB030454|Abalone; Abiyuch; Acerola; Acorn; Adzuki bean; Agar; Agave; Alaska blueberry; Alaska wild rhubarb; Alfalfa; Allium (Onion); Allspice; Almond; Alpine sweetvetch; Amaranth; American butterfish; American cranberry; American pokeweed; Angelica; Anise; Annual wild rice; Apple; Apricot; Arctic blackberry; Arrowhead; Arrowroot; Asian pear; Asparagus; Atlantic herring; Avocado; Babassu palm; Ba…	O=C(NCCSC(=O)CC(=O)CC=CCC(=O)O)CCNC(=O)C(C(COP(=O)(OP(=O)(OCC1OC(C(C1OP(=O)(O)O)O)n1cnc2c1ncnc2N)O)O)(C)C)O	1
O95573	ACSL3_HUMAN	6.2.1.3	1569818701	33615|RHEA: 33616,Metrxn:127777,OCDCAFATPc|FACOAL180,rxn37341|rxn37338|rxn37333|rxn37328|rxn09449|rxn08454,MNXR102141|MNXR99164,RXN-16380,HMR_2957|HMR_0249	6.2.1A2(rev)	Stearoyl-CoA	1467870680	C00412	CCCCCCCCCCCCCCCCCC(=O)SCCNC(=O)CCNC(=O)C(C(COP(=O)(OP(=O)(OCC1OC(C(C1OP(=O)(O)O)O)n1cnc2c1ncnc2N)O)O)(C)C)O	Citramalyl-CoA	1467875858	C00904,C01011,C20746			FDB023897|	CC(C(=O)O)(CC(=O)SCCNC(=O)CCNC(=O)C(C(COP(=O)(OP(=O)(OCC1OC(C(C1OP(=O)(O)O)O)n1cnc2c1ncnc2N)O)O)(C)C)O)O	1
O95573	ACSL3_HUMAN	6.2.1.3	1569818701	33615|RHEA: 33616,Metrxn:127777,OCDCAFATPc|FACOAL180,rxn37341|rxn37338|rxn37333|rxn37328|rxn09449|rxn08454,MNXR102141|MNXR99164,RXN-16380,HMR_2957|HMR_0249	6.2.1A2(rev)	Stearoyl-CoA	1467870680	C00412	CCCCCCCCCCCCCCCCCC(=O)SCCNC(=O)CCNC(=O)C(C(COP(=O)(OP(=O)(OCC1OC(C(C1OP(=O)(O)O)O)n1cnc2c1ncnc2N)O)O)(C)C)O	(25S)-3-Oxocholest-4-en-26-oyl-CoA	1468048293	C20840			FDB030459|Abalone; Abiyuch; Acerola; Acorn; Adzuki bean; Agar; Agave; Alaska blueberry; Alaska wild rhubarb; Alfalfa; Allium (Onion); Allspice; Almond; Alpine sweetvetch; Amaranth; American butterfish; American cranberry; American pokeweed; Angelica; Anise; Annual wild rice; Apple; Apricot; Arctic blackberry; Arrowhead; Arrowroot; Asian pear; Asparagus; Atlantic herring; Avocado; Babassu palm; Ba…	CC(C(C(=O)NCCC(=O)NCCSC(=O)C(CCCC(C1CCC2C1(C)CCC1C2CCC2=CC(=O)CCC12C)C)C)O)(COP(=O)(OP(=O)(OCC1OC(C(C1OP(=O)(O)O)O)n1cnc2c1ncnc2N)O)O)C	1
O95573	ACSL3_HUMAN	6.2.1.3	1569818701	33615|RHEA: 33616,Metrxn:127777,OCDCAFATPc|FACOAL180,rxn37341|rxn37338|rxn37333|rxn37328|rxn09449|rxn08454,MNXR102141|MNXR99164,RXN-16380,HMR_2957|HMR_0249	6.2.1A2(rev)	Stearoyl-CoA	1467870680	C00412	CCCCCCCCCCCCCCCCCC(=O)SCCNC(=O)CCNC(=O)C(C(COP(=O)(OP(=O)(OCC1OC(C(C1OP(=O)(O)O)O)n1cnc2c1ncnc2N)O)O)(C)C)O	(S)-3-Hydroxybutanoyl-CoA	1467878105	C01144,C03561,C05116	DB03612,EXPT00172		FDB022460|	CC(CC(=O)SCCNC(=O)CCNC(=O)C(C(COP(=O)(OP(=O)(OCC1OC(C(C1OP(=O)(O)O)O)n1cnc2c1ncnc2N)O)O)(C)C)O)O	1
O95573	ACSL3_HUMAN	6.2.1.3	1569818701	33615|RHEA: 33616,Metrxn:127777,OCDCAFATPc|FACOAL180,rxn37341|rxn37338|rxn37333|rxn37328|rxn09449|rxn08454,MNXR102141|MNXR99164,RXN-16380,HMR_2957|HMR_0249	6.2.1A2(rev)	Stearoyl-CoA	1467870680	C00412	CCCCCCCCCCCCCCCCCC(=O)SCCNC(=O)CCNC(=O)C(C(COP(=O)(OP(=O)(OCC1OC(C(C1OP(=O)(O)O)O)n1cnc2c1ncnc2N)O)O)(C)C)O	3-(4-Methylpent-3-en-1-yl)pent-2-enedioyl-CoA	1467879524	C01291				O=C(NCCSC(=O)C=C(CC(=O)O)CCC=C(C)C)CCNC(=O)C(C(COP(=O)(OP(=O)(OCC1OC(C(C1OP(=O)(O)O)O)n1cnc2c1ncnc2N)O)O)(C)C)O	1
O95573	ACSL3_HUMAN	6.2.1.3	1569818701	33615|RHEA: 33616,Metrxn:127777,OCDCAFATPc|FACOAL180,rxn37341|rxn37338|rxn37333|rxn37328|rxn09449|rxn08454,MNXR102141|MNXR99164,RXN-16380,HMR_2957|HMR_0249	6.2.1A2(rev)	Stearoyl-CoA	1467870680	C00412	CCCCCCCCCCCCCCCCCC(=O)SCCNC(=O)CCNC(=O)C(C(COP(=O)(OP(=O)(OCC1OC(C(C1OP(=O)(O)O)O)n1cnc2c1ncnc2N)O)O)(C)C)O	Choloyl-CoA	1467883641	C01794			FDB022586|	OC1CCC2(C(C1)CC(C1C2CC(O)C2(C1CCC2C(CCC(=O)SCCNC(=O)CCNC(=O)C(C(COP(=O)(OP(=O)(OCC1OC(C(C1OP(=O)(O)O)O)n1cnc2c1ncnc2N)O)O)(C)C)O)C)C)O)C	1
O95573	ACSL3_HUMAN	6.2.1.3	1569818701	33615|RHEA: 33616,Metrxn:127777,OCDCAFATPc|FACOAL180,rxn37341|rxn37338|rxn37333|rxn37328|rxn09449|rxn08454,MNXR102141|MNXR99164,RXN-16380,HMR_2957|HMR_0249	6.2.1A2(rev)	Stearoyl-CoA	1467870680	C00412	CCCCCCCCCCCCCCCCCC(=O)SCCNC(=O)CCNC(=O)C(C(COP(=O)(OP(=O)(OCC1OC(C(C1OP(=O)(O)O)O)n1cnc2c1ncnc2N)O)O)(C)C)O	Biotinyl-CoA	1467884508	C01894				O=C(NCCSC(=O)CCCCC1SCC2C1NC(=O)N2)CCNC(=O)C(C(COP(=O)(OP(=O)(OCC1OC(C(C1OP(=O)(O)O)O)n1cnc2c1ncnc2N)O)O)(C)C)O	1
O95573	ACSL3_HUMAN	6.2.1.3	1569836305	BS279,33607|RHEA: 33608,Metrxn:68516,OLEICFATPtc,rxn32459|rxn32444|rxn32438|rxn25734|rxn12282|rxn32436,MNXR122919,RXN-9644|RXN-9644,RXN0-7239,HMR_2961|HMR_2959|HMR_0267|HMR_0263	6.2.1A2(rev)	Oleoyl-CoA	1467871766	C00510	CCCCCCCCC=CCCCCCCCC(=O)SCCNC(=O)CCNC(=O)C(C(COP(=O)(OP(=O)(OCC1OC(C(C1OP(=O)(O)O)O)n1cnc2c1ncnc2N)O)O)(C)C)O	Oleoyl-CoA	1467871766	C00510			FDB022554|Abalone; Abiyuch; Acerola; Acorn; Adzuki bean; Agar; Agave; Alaska blueberry; Alaska wild rhubarb; Alfalfa; Allium (Onion); Allspice; Almond; Alpine sweetvetch; Amaranth; American butterfish; American cranberry; American pokeweed; Angelica; Anise; Annual wild rice; Apple; Apricot; Arctic blackberry; Arrowhead; Arrowroot; Asian pear; Asparagus; Atlantic herring; Avocado; Babassu palm; Ba…	CCCCCCCCC=CCCCCCCCC(=O)SCCNC(=O)CCNC(=O)C(C(COP(=O)(OP(=O)(OCC1OC(C(C1OP(=O)(O)O)O)n1cnc2c1ncnc2N)O)O)(C)C)O	1
O95573	ACSL3_HUMAN	6.2.1.3	1569818701	33615|RHEA: 33616,Metrxn:127777,OCDCAFATPc|FACOAL180,rxn37341|rxn37338|rxn37333|rxn37328|rxn09449|rxn08454,MNXR102141|MNXR99164,RXN-16380,HMR_2957|HMR_0249	6.2.1A2(rev)	Stearoyl-CoA	1467870680	C00412	CCCCCCCCCCCCCCCCCC(=O)SCCNC(=O)CCNC(=O)C(C(COP(=O)(OP(=O)(OCC1OC(C(C1OP(=O)(O)O)O)n1cnc2c1ncnc2N)O)O)(C)C)O	Geranoyl-CoA	1467884701	C01920,C16465				O=C(NCCSC(=O)C=C(CCC=C(C)C)C)CCNC(=O)C(C(COP(=O)(OP(=O)(OCC1OC(C(C1OP(=O)(O)O)O)n1cnc2c1ncnc2N)O)O)(C)C)O	1
O95573	ACSL3_HUMAN	6.2.1.3	1569836305	BS279,33607|RHEA: 33608,Metrxn:68516,OLEICFATPtc,rxn32459|rxn32444|rxn32438|rxn25734|rxn12282|rxn32436,MNXR122919,RXN-9644|RXN-9644,RXN0-7239,HMR_2961|HMR_2959|HMR_0267|HMR_0263	6.2.1A2(rev)	Oleoyl-CoA	1467871766	C00510	CCCCCCCCC=CCCCCCCCC(=O)SCCNC(=O)CCNC(=O)C(C(COP(=O)(OP(=O)(OCC1OC(C(C1OP(=O)(O)O)O)n1cnc2c1ncnc2N)O)O)(C)C)O	Benzoyl-CoA	1467871797	C00512			FDB022929|Abalone; Abiyuch; Acerola; Acorn; Adzuki bean; Agar; Agave; Alaska blueberry; Alaska wild rhubarb; Alfalfa; Allium (Onion); Allspice; Almond; Alpine sweetvetch; Amaranth; American butterfish; American cranberry; American pokeweed; Angelica; Anise; Annual wild rice; Apple; Apricot; Arctic blackberry; Arrowhead; Arrowroot; Asian pear; Asparagus; Atlantic herring; Avocado; Babassu palm; Ba…	O=C(NCCSC(=O)c1ccccc1)CCNC(=O)C(C(COP(=O)(OP(=O)(OCC1OC(C(C1OP(=O)(O)O)O)n1cnc2c1ncnc2N)O)O)(C)C)O	1
O95573	ACSL3_HUMAN	6.2.1.3	1569836305	BS279,33607|RHEA: 33608,Metrxn:68516,OLEICFATPtc,rxn32459|rxn32444|rxn32438|rxn25734|rxn12282|rxn32436,MNXR122919,RXN-9644|RXN-9644,RXN0-7239,HMR_2961|HMR_2959|HMR_0267|HMR_0263	6.2.1A2(rev)	Oleoyl-CoA	1467871766	C00510	CCCCCCCCC=CCCCCCCCC(=O)SCCNC(=O)CCNC(=O)C(C(COP(=O)(OP(=O)(OCC1OC(C(C1OP(=O)(O)O)O)n1cnc2c1ncnc2N)O)O)(C)C)O	Itaconyl-CoA	1467872008	C00531			FDB023158|Abalone; Abiyuch; Acerola; Acorn; Adzuki bean; Agar; Agave; Alaska blueberry; Alaska wild rhubarb; Alfalfa; Allium (Onion); Allspice; Almond; Alpine sweetvetch; Amaranth; American butterfish; American cranberry; American pokeweed; Angelica; Anise; Annual wild rice; Apple; Apricot; Arctic blackberry; Arrowhead; Arrowroot; Asian pear; Asparagus; Atlantic herring; Avocado; Babassu palm; Ba…	O=C(NCCSC(=O)CC(=C)C(=O)O)CCNC(=O)C(C(COP(=O)(OP(=O)(OCC1OC(C(C1OP(=O)(O)O)O)n1cnc2c1ncnc2N)O)O)(C)C)O	1
O95573	ACSL3_HUMAN	6.2.1.3	1569818701	33615|RHEA: 33616,Metrxn:127777,OCDCAFATPc|FACOAL180,rxn37341|rxn37338|rxn37333|rxn37328|rxn09449|rxn08454,MNXR102141|MNXR99164,RXN-16380,HMR_2957|HMR_0249	6.2.1A2(rev)	Stearoyl-CoA	1467870680	C00412	CCCCCCCCCCCCCCCCCC(=O)SCCNC(=O)CCNC(=O)C(C(COP(=O)(OP(=O)(OCC1OC(C(C1OP(=O)(O)O)O)n1cnc2c1ncnc2N)O)O)(C)C)O	Nonanoyl-CoA	1467884907	C01942			FDB029254|	CCCCCCCCC(=O)SCCNC(=O)CCNC(=O)C(C(COP(=O)(OP(=O)(OCC1OC(C(C1OP(=O)(O)O)O)n1cnc2c1ncnc2N)O)O)(C)C)O	1
O95573	ACSL3_HUMAN	6.2.1.3	1569836305	BS279,33607|RHEA: 33608,Metrxn:68516,OLEICFATPtc,rxn32459|rxn32444|rxn32438|rxn25734|rxn12282|rxn32436,MNXR122919,RXN-9644|RXN-9644,RXN0-7239,HMR_2961|HMR_2959|HMR_0267|HMR_0263	6.2.1A2(rev)	Oleoyl-CoA	1467871766	C00510	CCCCCCCCC=CCCCCCCCC(=O)SCCNC(=O)CCNC(=O)C(C(COP(=O)(OP(=O)(OCC1OC(C(C1OP(=O)(O)O)O)n1cnc2c1ncnc2N)O)O)(C)C)O	Propenoyl-CoA	1467875744	C00894			FDB022958|Abalone; Abiyuch; Acerola; Acorn; Adzuki bean; Agar; Agave; Alaska blueberry; Alaska wild rhubarb; Alfalfa; Allium (Onion); Allspice; Almond; Alpine sweetvetch; Amaranth; American butterfish; American cranberry; American pokeweed; Angelica; Anise; Annual wild rice; Apple; Apricot; Arctic blackberry; Arrowhead; Arrowroot; Asian pear; Asparagus; Atlantic herring; Avocado; Babassu palm; Ba…	C=CC(=O)SCCNC(=O)CCNC(=O)C(C(COP(=O)(OP(=O)(OCC1OC(C(C1OP(=O)(O)O)O)n1cnc2c1ncnc2N)O)O)(C)C)O	1
O95573	ACSL3_HUMAN	6.2.1.3	1569836305	BS279,33607|RHEA: 33608,Metrxn:68516,OLEICFATPtc,rxn32459|rxn32444|rxn32438|rxn25734|rxn12282|rxn32436,MNXR122919,RXN-9644|RXN-9644,RXN0-7239,HMR_2961|HMR_2959|HMR_0267|HMR_0263	6.2.1A2(rev)	Oleoyl-CoA	1467871766	C00510	CCCCCCCCC=CCCCCCCCC(=O)SCCNC(=O)CCNC(=O)C(C(COP(=O)(OP(=O)(OCC1OC(C(C1OP(=O)(O)O)O)n1cnc2c1ncnc2N)O)O)(C)C)O	6-Carboxyhexanoyl-CoA	1467877338	C01063			FDB031120|Abalone; Abiyuch; Acerola; Acorn; Adzuki bean; Agar; Agave; Alaska blueberry; Alaska wild rhubarb; Alfalfa; Allium (Onion); Allspice; Almond; Alpine sweetvetch; Amaranth; American butterfish; American cranberry; American pokeweed; Angelica; Anise; Annual wild rice; Apple; Apricot; Arctic blackberry; Arrowhead; Arrowroot; Asian pear; Asparagus; Atlantic herring; Avocado; Babassu palm; Ba…	O=C(NCCSC(=O)CCCCCC(=O)O)CCNC(=O)C(C(COP(=O)(OP(=O)(OCC1OC(C(C1OP(=O)(O)O)O)n1cnc2c1ncnc2N)O)O)(C)C)O	1
O95573	ACSL3_HUMAN	6.2.1.3	1569818701	33615|RHEA: 33616,Metrxn:127777,OCDCAFATPc|FACOAL180,rxn37341|rxn37338|rxn37333|rxn37328|rxn09449|rxn08454,MNXR102141|MNXR99164,RXN-16380,HMR_2957|HMR_0249	6.2.1A2(rev)	Stearoyl-CoA	1467870680	C00412	CCCCCCCCCCCCCCCCCC(=O)SCCNC(=O)CCNC(=O)C(C(COP(=O)(OP(=O)(OCC1OC(C(C1OP(=O)(O)O)O)n1cnc2c1ncnc2N)O)O)(C)C)O	Farnesoyl-CoA	1467885638	C02030				O=C(NCCSC(=O)C=C(CCC=C(CCC=C(C)C)C)C)CCNC(=O)C(C(COP(=O)(OP(=O)(OCC1OC(C(C1OP(=O)(O)O)O)n1cnc2c1ncnc2N)O)O)(C)C)O	1
O95573	ACSL3_HUMAN	6.2.1.3	1569836305	BS279,33607|RHEA: 33608,Metrxn:68516,OLEICFATPtc,rxn32459|rxn32444|rxn32438|rxn25734|rxn12282|rxn32436,MNXR122919,RXN-9644|RXN-9644,RXN0-7239,HMR_2961|HMR_2959|HMR_0267|HMR_0263	6.2.1A2(rev)	Oleoyl-CoA	1467871766	C00510	CCCCCCCCC=CCCCCCCCC(=O)SCCNC(=O)CCNC(=O)C(C(COP(=O)(OP(=O)(OCC1OC(C(C1OP(=O)(O)O)O)n1cnc2c1ncnc2N)O)O)(C)C)O	Lauroyl-CoA	1467883918	C01832	DB03264,EXPT01131	CHEMBL1949898	FDB023198|Abalone; Abiyuch; Acerola; Acorn; Adzuki bean; Agar; Agave; Alaska blueberry; Alaska wild rhubarb; Alfalfa; Allium (Onion); Allspice; Almond; Alpine sweetvetch; Amaranth; American butterfish; American cranberry; American pokeweed; Angelica; Anise; Annual wild rice; Apple; Apricot; Arctic blackberry; Arrowhead; Arrowroot; Asian pear; Asparagus; Atlantic herring; Avocado; Babassu palm; Ba…	CCCCCCCCCCCC(=O)SCCNC(=O)CCNC(=O)C(C(COP(=O)(OP(=O)(OCC1OC(C(C1OP(=O)(O)O)O)n1cnc2c1ncnc2N)O)O)(C)C)O	1
O95573	ACSL3_HUMAN	6.2.1.3	1569818701	33615|RHEA: 33616,Metrxn:127777,OCDCAFATPc|FACOAL180,rxn37341|rxn37338|rxn37333|rxn37328|rxn09449|rxn08454,MNXR102141|MNXR99164,RXN-16380,HMR_2957|HMR_0249	6.2.1A2(rev)	Stearoyl-CoA	1467870680	C00412	CCCCCCCCCCCCCCCCCC(=O)SCCNC(=O)CCNC(=O)C(C(COP(=O)(OP(=O)(OCC1OC(C(C1OP(=O)(O)O)O)n1cnc2c1ncnc2N)O)O)(C)C)O	Eicosanoyl-CoA	1467885719	C02041			FDB023354|	CCCCCCCCCCCCCCCCCCCC(=O)SCCNC(=O)CCNC(=O)C(C(COP(=O)(OP(=O)(OCC1OC(C(C1OP(=O)(O)O)O)n1cnc2c1ncnc2N)O)O)(C)C)O	1
O95573	ACSL3_HUMAN	6.2.1.3	1569836305	BS279,33607|RHEA: 33608,Metrxn:68516,OLEICFATPtc,rxn32459|rxn32444|rxn32438|rxn25734|rxn12282|rxn32436,MNXR122919,RXN-9644|RXN-9644,RXN0-7239,HMR_2961|HMR_2959|HMR_0267|HMR_0263	6.2.1A2(rev)	Oleoyl-CoA	1467871766	C00510	CCCCCCCCC=CCCCCCCCC(=O)SCCNC(=O)CCNC(=O)C(C(COP(=O)(OP(=O)(OCC1OC(C(C1OP(=O)(O)O)O)n1cnc2c1ncnc2N)O)O)(C)C)O	Octanoyl-CoA	1467884933	C01944		CHEMBL1949896	FDB022409|Abalone; Abiyuch; Acerola; Acorn; Adzuki bean; Agar; Agave; Alaska blueberry; Alaska wild rhubarb; Alfalfa; Allium (Onion); Allspice; Almond; Alpine sweetvetch; Amaranth; American butterfish; American cranberry; American pokeweed; Angelica; Anise; Annual wild rice; Apple; Apricot; Arctic blackberry; Arrowhead; Arrowroot; Asian pear; Asparagus; Atlantic herring; Avocado; Babassu palm; Ba…	CCCCCCCC(=O)SCCNC(=O)CCNC(=O)C(C(COP(=O)(OP(=O)(OCC1OC(C(C1OP(=O)(O)O)O)n1cnc2c1ncnc2N)O)O)(C)C)O	1
O95573	ACSL3_HUMAN	6.2.1.3	1569836305	BS279,33607|RHEA: 33608,Metrxn:68516,OLEICFATPtc,rxn32459|rxn32444|rxn32438|rxn25734|rxn12282|rxn32436,MNXR122919,RXN-9644|RXN-9644,RXN0-7239,HMR_2961|HMR_2959|HMR_0267|HMR_0263	6.2.1A2(rev)	Oleoyl-CoA	1467871766	C00510	CCCCCCCCC=CCCCCCCCC(=O)SCCNC(=O)CCNC(=O)C(C(COP(=O)(OP(=O)(OCC1OC(C(C1OP(=O)(O)O)O)n1cnc2c1ncnc2N)O)O)(C)C)O	Tetradecanoyl-CoA	1467889952	C02593		CHEMBL1949899	FDB022670|Abalone; Abiyuch; Acerola; Acorn; Adzuki bean; Agar; Agave; Alaska blueberry; Alaska wild rhubarb; Alfalfa; Allium (Onion); Allspice; Almond; Alpine sweetvetch; Amaranth; American butterfish; American cranberry; American pokeweed; Angelica; Anise; Annual wild rice; Apple; Apricot; Arctic blackberry; Arrowhead; Arrowroot; Asian pear; Asparagus; Atlantic herring; Avocado; Babassu palm; Ba…	CCCCCCCCCCCCCC(=O)SCCNC(=O)CCNC(=O)C(C(COP(=O)(OP(=O)(OCC1OC(C(C1OP(=O)(O)O)O)n1cnc2c1ncnc2N)O)O)(C)C)O	1
O95573	ACSL3_HUMAN	6.2.1.3	1569818701	33615|RHEA: 33616,Metrxn:127777,OCDCAFATPc|FACOAL180,rxn37341|rxn37338|rxn37333|rxn37328|rxn09449|rxn08454,MNXR102141|MNXR99164,RXN-16380,HMR_2957|HMR_0249	6.2.1A2(rev)	Stearoyl-CoA	1467870680	C00412	CCCCCCCCCCCCCCCCCC(=O)SCCNC(=O)CCNC(=O)C(C(COP(=O)(OP(=O)(OCC1OC(C(C1OP(=O)(O)O)O)n1cnc2c1ncnc2N)O)O)(C)C)O	Phytanoyl-CoA	1467885878	C02060			FDB022577|	CC(CC(=O)SCCNC(=O)CCNC(=O)C(C(COP(=O)(OP(=O)(OCC1OC(C(C1OP(=O)(O)O)O)n1cnc2c1ncnc2N)O)O)(C)C)O)CCCC(CCCC(CCCC(C)C)C)C	1
O95573	ACSL3_HUMAN	6.2.1.3	1569836305	BS279,33607|RHEA: 33608,Metrxn:68516,OLEICFATPtc,rxn32459|rxn32444|rxn32438|rxn25734|rxn12282|rxn32436,MNXR122919,RXN-9644|RXN-9644,RXN0-7239,HMR_2961|HMR_2959|HMR_0267|HMR_0263	6.2.1A2(rev)	Oleoyl-CoA	1467871766	C00510	CCCCCCCCC=CCCCCCCCC(=O)SCCNC(=O)CCNC(=O)C(C(COP(=O)(OP(=O)(OCC1OC(C(C1OP(=O)(O)O)O)n1cnc2c1ncnc2N)O)O)(C)C)O	3-Methylbutanoyl-CoA	1467892444	C02939			FDB022430|Abalone; Abiyuch; Acerola; Acorn; Adzuki bean; Agar; Agave; Alaska blueberry; Alaska wild rhubarb; Alfalfa; Allium (Onion); Allspice; Almond; Alpine sweetvetch; Amaranth; American butterfish; American cranberry; American pokeweed; Angelica; Anise; Annual wild rice; Apple; Apricot; Arctic blackberry; Arrowhead; Arrowroot; Asian pear; Asparagus; Atlantic herring; Avocado; Babassu palm; Ba…	CC(CC(=O)SCCNC(=O)CCNC(=O)C(C(COP(=O)(OP(=O)(OCC1OC(C(C1OP(=O)(O)O)O)n1cnc2c1ncnc2N)O)O)(C)C)O)C	1
O95573	ACSL3_HUMAN	6.2.1.3	1569836305	BS279,33607|RHEA: 33608,Metrxn:68516,OLEICFATPtc,rxn32459|rxn32444|rxn32438|rxn25734|rxn12282|rxn32436,MNXR122919,RXN-9644|RXN-9644,RXN0-7239,HMR_2961|HMR_2959|HMR_0267|HMR_0263	6.2.1A2(rev)	Oleoyl-CoA	1467871766	C00510	CCCCCCCCC=CCCCCCCCC(=O)SCCNC(=O)CCNC(=O)C(C(COP(=O)(OP(=O)(OCC1OC(C(C1OP(=O)(O)O)O)n1cnc2c1ncnc2N)O)O)(C)C)O	3-Methylcrotonyl-CoA	1467893475	C03069			FDB022652|Abalone; Abiyuch; Acerola; Acorn; Adzuki bean; Agar; Agave; Alaska blueberry; Alaska wild rhubarb; Alfalfa; Allium (Onion); Allspice; Almond; Alpine sweetvetch; Amaranth; American butterfish; American cranberry; American pokeweed; Angelica; Anise; Annual wild rice; Apple; Apricot; Arctic blackberry; Arrowhead; Arrowroot; Asian pear; Asparagus; Atlantic herring; Avocado; Babassu palm; Ba…	O=C(NCCSC(=O)C=C(C)C)CCNC(=O)C(C(COP(=O)(OP(=O)(OCC1OC(C(C1OP(=O)(O)O)O)n1cnc2c1ncnc2N)O)O)(C)C)O	1
O95573	ACSL3_HUMAN	6.2.1.3	1569818701	33615|RHEA: 33616,Metrxn:127777,OCDCAFATPc|FACOAL180,rxn37341|rxn37338|rxn37333|rxn37328|rxn09449|rxn08454,MNXR102141|MNXR99164,RXN-16380,HMR_2957|HMR_0249	6.2.1A2(rev)	Stearoyl-CoA	1467870680	C00412	CCCCCCCCCCCCCCCCCC(=O)SCCNC(=O)CCNC(=O)C(C(COP(=O)(OP(=O)(OCC1OC(C(C1OP(=O)(O)O)O)n1cnc2c1ncnc2N)O)O)(C)C)O	Anthraniloyl-CoA	1467887423	C02247				O=C(NCCSC(=O)c1ccccc1N)CCNC(=O)C(C(COP(=O)(OP(=O)(OCC1OC(C(C1OP(=O)(O)O)O)n1cnc2c1ncnc2N)O)O)(C)C)O	1
O95573	ACSL3_HUMAN	6.2.1.3	1569836305	BS279,33607|RHEA: 33608,Metrxn:68516,OLEICFATPtc,rxn32459|rxn32444|rxn32438|rxn25734|rxn12282|rxn32436,MNXR122919,RXN-9644|RXN-9644,RXN0-7239,HMR_2961|HMR_2959|HMR_0267|HMR_0263	6.2.1A2(rev)	Oleoyl-CoA	1467871766	C00510	CCCCCCCCC=CCCCCCCCC(=O)SCCNC(=O)CCNC(=O)C(C(COP(=O)(OP(=O)(OCC1OC(C(C1OP(=O)(O)O)O)n1cnc2c1ncnc2N)O)O)(C)C)O	2-Succinylbenzoyl-CoA	1467894138	C03160			FDB030478|Abalone; Abiyuch; Acerola; Acorn; Adzuki bean; Agar; Agave; Alaska blueberry; Alaska wild rhubarb; Alfalfa; Allium (Onion); Allspice; Almond; Alpine sweetvetch; Amaranth; American butterfish; American cranberry; American pokeweed; Angelica; Anise; Annual wild rice; Apple; Apricot; Arctic blackberry; Arrowhead; Arrowroot; Asian pear; Asparagus; Atlantic herring; Avocado; Babassu palm; Ba…	O=C(NCCSC(=O)CCC(=O)c1ccccc1C(=O)O)CCNC(=O)C(C(COP(=O)(OP(=O)(OCC1OC(C(C1OP(=O)(O)O)O)n1cnc2c1ncnc2N)O)O)(C)C)O	1
O95573	ACSL3_HUMAN	6.2.1.3	1569836305	BS279,33607|RHEA: 33608,Metrxn:68516,OLEICFATPtc,rxn32459|rxn32444|rxn32438|rxn25734|rxn12282|rxn32436,MNXR122919,RXN-9644|RXN-9644,RXN0-7239,HMR_2961|HMR_2959|HMR_0267|HMR_0263	6.2.1A2(rev)	Oleoyl-CoA	1467871766	C00510	CCCCCCCCC=CCCCCCCCC(=O)SCCNC(=O)CCNC(=O)C(C(COP(=O)(OP(=O)(OCC1OC(C(C1OP(=O)(O)O)O)n1cnc2c1ncnc2N)O)O)(C)C)O	3-Methylglutaconyl-CoA	1467894732	C03231			FDB022396|Abalone; Abiyuch; Acerola; Acorn; Adzuki bean; Agar; Agave; Alaska blueberry; Alaska wild rhubarb; Alfalfa; Allium (Onion); Allspice; Almond; Alpine sweetvetch; Amaranth; American butterfish; American cranberry; American pokeweed; Angelica; Anise; Annual wild rice; Apple; Apricot; Arctic blackberry; Arrowhead; Arrowroot; Asian pear; Asparagus; Atlantic herring; Avocado; Babassu palm; Ba…	O=C(NCCSC(=O)C=C(CC(=O)O)C)CCNC(=O)C(C(COP(=O)(OP(=O)(OCC1OC(C(C1OP(=O)(O)O)O)n1cnc2c1ncnc2N)O)O)(C)C)O	1
O95573	ACSL3_HUMAN	6.2.1.3	1569818701	33615|RHEA: 33616,Metrxn:127777,OCDCAFATPc|FACOAL180,rxn37341|rxn37338|rxn37333|rxn37328|rxn09449|rxn08454,MNXR102141|MNXR99164,RXN-16380,HMR_2957|HMR_0249	6.2.1A2(rev)	Stearoyl-CoA	1467870680	C00412	CCCCCCCCCCCCCCCCCC(=O)SCCNC(=O)CCNC(=O)C(C(COP(=O)(OP(=O)(OCC1OC(C(C1OP(=O)(O)O)O)n1cnc2c1ncnc2N)O)O)(C)C)O	Arachidonyl-CoA	1467887441	C02249			FDB023270|	CCCCCC=CCC=CCC=CCC=CCCCC(=O)SCCNC(=O)CCNC(=O)C(C(COP(=O)(OP(=O)(OCC1OC(C(C1OP(=O)(O)O)O)n1cnc2c1ncnc2N)O)O)(C)C)O	1
O95573	ACSL3_HUMAN	6.2.1.3	1569836305	BS279,33607|RHEA: 33608,Metrxn:68516,OLEICFATPtc,rxn32459|rxn32444|rxn32438|rxn25734|rxn12282|rxn32436,MNXR122919,RXN-9644|RXN-9644,RXN0-7239,HMR_2961|HMR_2959|HMR_0267|HMR_0263	6.2.1A2(rev)	Oleoyl-CoA	1467871766	C00510	CCCCCCCCC=CCCCCCCCC(=O)SCCNC(=O)CCNC(=O)C(C(COP(=O)(OP(=O)(OCC1OC(C(C1OP(=O)(O)O)O)n1cnc2c1ncnc2N)O)O)(C)C)O	2-Methylacetoacetyl-CoA	1467895458	C03344			FDB022455|Abalone; Abiyuch; Acerola; Acorn; Adzuki bean; Agar; Agave; Alaska blueberry; Alaska wild rhubarb; Alfalfa; Allium (Onion); Allspice; Almond; Alpine sweetvetch; Amaranth; American butterfish; American cranberry; American pokeweed; Angelica; Anise; Annual wild rice; Apple; Apricot; Arctic blackberry; Arrowhead; Arrowroot; Asian pear; Asparagus; Atlantic herring; Avocado; Babassu palm; Ba…	O=C(NCCSC(=O)C(C(=O)C)C)CCNC(=O)C(C(COP(=O)(OP(=O)(OCC1OC(C(C1OP(=O)(O)O)O)n1cnc2c1ncnc2N)O)O)(C)C)O	1
O95573	ACSL3_HUMAN	6.2.1.3	1569836305	BS279,33607|RHEA: 33608,Metrxn:68516,OLEICFATPtc,rxn32459|rxn32444|rxn32438|rxn25734|rxn12282|rxn32436,MNXR122919,RXN-9644|RXN-9644,RXN0-7239,HMR_2961|HMR_2959|HMR_0267|HMR_0263	6.2.1A2(rev)	Oleoyl-CoA	1467871766	C00510	CCCCCCCCC=CCCCCCCCC(=O)SCCNC(=O)CCNC(=O)C(C(COP(=O)(OP(=O)(OCC1OC(C(C1OP(=O)(O)O)O)n1cnc2c1ncnc2N)O)O)(C)C)O	(2S,3S)-3-Hydroxy-2-methylbutanoyl-CoA	1467902742	C04405			FDB022575|Abalone; Abiyuch; Acerola; Acorn; Adzuki bean; Agar; Agave; Alaska blueberry; Alaska wild rhubarb; Alfalfa; Allium (Onion); Allspice; Almond; Alpine sweetvetch; Amaranth; American butterfish; American cranberry; American pokeweed; Angelica; Anise; Annual wild rice; Apple; Apricot; Arctic blackberry; Arrowhead; Arrowroot; Asian pear; Asparagus; Atlantic herring; Avocado; Babassu palm; Ba…	O=C(NCCSC(=O)C(C(O)C)C)CCNC(=O)C(C(COP(=O)(OP(=O)(OCC1OC(C(C1OP(=O)(O)O)O)n1cnc2c1ncnc2N)O)O)(C)C)O	1
O95573	ACSL3_HUMAN	6.2.1.3	1569818701	33615|RHEA: 33616,Metrxn:127777,OCDCAFATPc|FACOAL180,rxn37341|rxn37338|rxn37333|rxn37328|rxn09449|rxn08454,MNXR102141|MNXR99164,RXN-16380,HMR_2957|HMR_0249	6.2.1A2(rev)	Stearoyl-CoA	1467870680	C00412	CCCCCCCCCCCCCCCCCC(=O)SCCNC(=O)CCNC(=O)C(C(COP(=O)(OP(=O)(OCC1OC(C(C1OP(=O)(O)O)O)n1cnc2c1ncnc2N)O)O)(C)C)O	Vinylacetyl-CoA	1467888042	C02331				C=CCC(=O)SCCNC(=O)CCNC(=O)C(C(COP(=O)(OP(=O)(OCC1OC(C(C1OP(=O)(O)O)O)n1cnc2c1ncnc2N)O)O)(C)C)O	1
O95573	ACSL3_HUMAN	6.2.1.3	1569836305	BS279,33607|RHEA: 33608,Metrxn:68516,OLEICFATPtc,rxn32459|rxn32444|rxn32438|rxn25734|rxn12282|rxn32436,MNXR122919,RXN-9644|RXN-9644,RXN0-7239,HMR_2961|HMR_2959|HMR_0267|HMR_0263	6.2.1A2(rev)	Oleoyl-CoA	1467871766	C00510	CCCCCCCCC=CCCCCCCCC(=O)SCCNC(=O)CCNC(=O)C(C(COP(=O)(OP(=O)(OCC1OC(C(C1OP(=O)(O)O)O)n1cnc2c1ncnc2N)O)O)(C)C)O	3-Oxodecanoyl-CoA	1467908051	C05265			FDB023258|Abalone; Abiyuch; Acerola; Acorn; Adzuki bean; Agar; Agave; Alaska blueberry; Alaska wild rhubarb; Alfalfa; Allium (Onion); Allspice; Almond; Alpine sweetvetch; Amaranth; American butterfish; American cranberry; American pokeweed; Angelica; Anise; Annual wild rice; Apple; Apricot; Arctic blackberry; Arrowhead; Arrowroot; Asian pear; Asparagus; Atlantic herring; Avocado; Babassu palm; Ba…	CCCCCCCC(=O)CC(=O)SCCNC(=O)CCNC(=O)C(C(COP(=O)(OP(=O)(OCC1OC(C(C1OP(=O)(O)O)O)n1cnc2c1ncnc2N)O)O)(C)C)O	1
O95573	ACSL3_HUMAN	6.2.1.3	1569836305	BS279,33607|RHEA: 33608,Metrxn:68516,OLEICFATPtc,rxn32459|rxn32444|rxn32438|rxn25734|rxn12282|rxn32436,MNXR122919,RXN-9644|RXN-9644,RXN0-7239,HMR_2961|HMR_2959|HMR_0267|HMR_0263	6.2.1A2(rev)	Oleoyl-CoA	1467871766	C00510	CCCCCCCCC=CCCCCCCCC(=O)SCCNC(=O)CCNC(=O)C(C(COP(=O)(OP(=O)(OCC1OC(C(C1OP(=O)(O)O)O)n1cnc2c1ncnc2N)O)O)(C)C)O	3-Oxohexanoyl-CoA	1467908099	C05269			FDB023262|Abalone; Abiyuch; Acerola; Acorn; Adzuki bean; Agar; Agave; Alaska blueberry; Alaska wild rhubarb; Alfalfa; Allium (Onion); Allspice; Almond; Alpine sweetvetch; Amaranth; American butterfish; American cranberry; American pokeweed; Angelica; Anise; Annual wild rice; Apple; Apricot; Arctic blackberry; Arrowhead; Arrowroot; Asian pear; Asparagus; Atlantic herring; Avocado; Babassu palm; Ba…	CCCC(=O)CC(=O)SCCNC(=O)CCNC(=O)C(C(COP(=O)(OP(=O)(OCC1OC(C(C1OP(=O)(O)O)O)n1cnc2c1ncnc2N)O)O)(C)C)O	1
O95573	ACSL3_HUMAN	6.2.1.3	1569818701	33615|RHEA: 33616,Metrxn:127777,OCDCAFATPc|FACOAL180,rxn37341|rxn37338|rxn37333|rxn37328|rxn09449|rxn08454,MNXR102141|MNXR99164,RXN-16380,HMR_2957|HMR_0249	6.2.1A2(rev)	Stearoyl-CoA	1467870680	C00412	CCCCCCCCCCCCCCCCCC(=O)SCCNC(=O)CCNC(=O)C(C(COP(=O)(OP(=O)(OCC1OC(C(C1OP(=O)(O)O)O)n1cnc2c1ncnc2N)O)O)(C)C)O	beta-Alanyl-CoA	1467888083	C02335			FDB024091|	NCCC(=O)SCCNC(=O)CCNC(=O)C(C(COP(=O)(OP(=O)(OCC1OC(C(C1OP(=O)(O)O)O)n1cnc2c1ncnc2N)O)O)(C)C)O	1
O95573	ACSL3_HUMAN	6.2.1.3	1569836305	BS279,33607|RHEA: 33608,Metrxn:68516,OLEICFATPtc,rxn32459|rxn32444|rxn32438|rxn25734|rxn12282|rxn32436,MNXR122919,RXN-9644|RXN-9644,RXN0-7239,HMR_2961|HMR_2959|HMR_0267|HMR_0263	6.2.1A2(rev)	Oleoyl-CoA	1467871766	C00510	CCCCCCCCC=CCCCCCCCC(=O)SCCNC(=O)CCNC(=O)C(C(COP(=O)(OP(=O)(OCC1OC(C(C1OP(=O)(O)O)O)n1cnc2c1ncnc2N)O)O)(C)C)O	trans-Oct-2-enoyl-CoA	1467908186	C05276			FDB023268|Abalone; Abiyuch; Acerola; Acorn; Adzuki bean; Agar; Agave; Alaska blueberry; Alaska wild rhubarb; Alfalfa; Allium (Onion); Allspice; Almond; Alpine sweetvetch; Amaranth; American butterfish; American cranberry; American pokeweed; Angelica; Anise; Annual wild rice; Apple; Apricot; Arctic blackberry; Arrowhead; Arrowroot; Asian pear; Asparagus; Atlantic herring; Avocado; Babassu palm; Ba…	CCCCCC=CC(=O)SCCNC(=O)CCNC(=O)C(C(COP(=O)(OP(=O)(OCC1OC(C(C1OP(=O)(O)O)O)n1cnc2c1ncnc2N)O)O)(C)C)O	1
O95573	ACSL3_HUMAN	6.2.1.3	1569836305	BS279,33607|RHEA: 33608,Metrxn:68516,OLEICFATPtc,rxn32459|rxn32444|rxn32438|rxn25734|rxn12282|rxn32436,MNXR122919,RXN-9644|RXN-9644,RXN0-7239,HMR_2961|HMR_2959|HMR_0267|HMR_0263	6.2.1A2(rev)	Oleoyl-CoA	1467871766	C00510	CCCCCCCCC=CCCCCCCCC(=O)SCCNC(=O)CCNC(=O)C(C(COP(=O)(OP(=O)(OCC1OC(C(C1OP(=O)(O)O)O)n1cnc2c1ncnc2N)O)O)(C)C)O	N-Methylanthraniloyl-CoA	1467976983	C12092			FDB031041|Abalone; Abiyuch; Acerola; Acorn; Adzuki bean; Agar; Agave; Alaska blueberry; Alaska wild rhubarb; Alfalfa; Allium (Onion); Allspice; Almond; Alpine sweetvetch; Amaranth; American butterfish; American cranberry; American pokeweed; Angelica; Anise; Annual wild rice; Apple; Apricot; Arctic blackberry; Arrowhead; Arrowroot; Asian pear; Asparagus; Atlantic herring; Avocado; Babassu palm; Ba…	CNc1ccccc1C(=O)SCCNC(=O)CCNC(=O)C(C(COP(=O)(OP(=O)(OCC1OC(C(C1OP(=O)(O)O)O)n1cnc2c1ncnc2N)O)O)(C)C)O	1
O95573	ACSL3_HUMAN	6.2.1.3	1569818701	33615|RHEA: 33616,Metrxn:127777,OCDCAFATPc|FACOAL180,rxn37341|rxn37338|rxn37333|rxn37328|rxn09449|rxn08454,MNXR102141|MNXR99164,RXN-16380,HMR_2957|HMR_0249	6.2.1A2(rev)	Stearoyl-CoA	1467870680	C00412	CCCCCCCCCCCCCCCCCC(=O)SCCNC(=O)CCNC(=O)C(C(COP(=O)(OP(=O)(OCC1OC(C(C1OP(=O)(O)O)O)n1cnc2c1ncnc2N)O)O)(C)C)O	Glutaconyl-1-CoA	1467888647	C02411			FDB022535|	O=C(NCCSC(=O)C=CCC(=O)O)CCNC(=O)C(C(COP(=O)(OP(=O)(OCC1OC(C(C1OP(=O)(O)O)O)n1cnc2c1ncnc2N)O)O)(C)C)O	1
O95573	ACSL3_HUMAN	6.2.1.3	1569836305	BS279,33607|RHEA: 33608,Metrxn:68516,OLEICFATPtc,rxn32459|rxn32444|rxn32438|rxn25734|rxn12282|rxn32436,MNXR122919,RXN-9644|RXN-9644,RXN0-7239,HMR_2961|HMR_2959|HMR_0267|HMR_0263	6.2.1A2(rev)	Oleoyl-CoA	1467871766	C00510	CCCCCCCCC=CCCCCCCCC(=O)SCCNC(=O)CCNC(=O)C(C(COP(=O)(OP(=O)(OCC1OC(C(C1OP(=O)(O)O)O)n1cnc2c1ncnc2N)O)O)(C)C)O	5-Hydroxyferuloyl-CoA	1467978174	C12203		ChEMBLE_NTD	FDB030572|Abalone; Abiyuch; Acerola; Acorn; Adzuki bean; Agar; Agave; Alaska blueberry; Alaska wild rhubarb; Alfalfa; Allium (Onion); Allspice; Almond; Alpine sweetvetch; Amaranth; American butterfish; American cranberry; American pokeweed; Angelica; Anise; Annual wild rice; Apple; Apricot; Arctic blackberry; Arrowhead; Arrowroot; Asian pear; Asparagus; Atlantic herring; Avocado; Babassu palm; Ba…	COc1cc(C=CC(=O)SCCNC(=O)CCNC(=O)C(C(COP(=O)(OP(=O)(OCC2OC(C(C2OP(=O)(O)O)O)n2cnc3c2ncnc3N)O)O)(C)C)O)cc(c1O)O	1
O95573	ACSL3_HUMAN	6.2.1.3	1569836305	BS279,33607|RHEA: 33608,Metrxn:68516,OLEICFATPtc,rxn32459|rxn32444|rxn32438|rxn25734|rxn12282|rxn32436,MNXR122919,RXN-9644|RXN-9644,RXN0-7239,HMR_2961|HMR_2959|HMR_0267|HMR_0263	6.2.1A2(rev)	Oleoyl-CoA	1467871766	C00510	CCCCCCCCC=CCCCCCCCC(=O)SCCNC(=O)CCNC(=O)C(C(COP(=O)(OP(=O)(OCC1OC(C(C1OP(=O)(O)O)O)n1cnc2c1ncnc2N)O)O)(C)C)O	5-Carboxy-2-pentenoyl-CoA	1467987972	C14144			FDB030295|Abalone; Abiyuch; Acerola; Acorn; Adzuki bean; Agar; Agave; Alaska blueberry; Alaska wild rhubarb; Alfalfa; Allium (Onion); Allspice; Almond; Alpine sweetvetch; Amaranth; American butterfish; American cranberry; American pokeweed; Angelica; Anise; Annual wild rice; Apple; Apricot; Arctic blackberry; Arrowhead; Arrowroot; Asian pear; Asparagus; Atlantic herring; Avocado; Babassu palm; Ba…	O=C(NCCSC(=O)C=CCCC(=O)O)CCNC(=O)C(C(COP(=O)(OP(=O)(OCC1OC(C(C1OP(=O)(O)O)O)n1cnc2c1ncnc2N)O)O)(C)C)O	1
O95573	ACSL3_HUMAN	6.2.1.3	1569818701	33615|RHEA: 33616,Metrxn:127777,OCDCAFATPc|FACOAL180,rxn37341|rxn37338|rxn37333|rxn37328|rxn09449|rxn08454,MNXR102141|MNXR99164,RXN-16380,HMR_2957|HMR_0249	6.2.1A2(rev)	Stearoyl-CoA	1467870680	C00412	CCCCCCCCCCCCCCCCCC(=O)SCCNC(=O)CCNC(=O)C(C(COP(=O)(OP(=O)(OCC1OC(C(C1OP(=O)(O)O)O)n1cnc2c1ncnc2N)O)O)(C)C)O	Pent-2-enoyl-CoA	1467888846	C02451				CCC=CC(=O)SCCNC(=O)CCNC(=O)C(C(COP(=O)(OP(=O)(OCC1OC(C(C1OP(=O)(O)O)O)n1cnc2c1ncnc2N)O)O)(C)C)O	1
O95573	ACSL3_HUMAN	6.2.1.3	1569836305	BS279,33607|RHEA: 33608,Metrxn:68516,OLEICFATPtc,rxn32459|rxn32444|rxn32438|rxn25734|rxn12282|rxn32436,MNXR122919,RXN-9644|RXN-9644,RXN0-7239,HMR_2961|HMR_2959|HMR_0267|HMR_0263	6.2.1A2(rev)	Oleoyl-CoA	1467871766	C00510	CCCCCCCCC=CCCCCCCCC(=O)SCCNC(=O)CCNC(=O)C(C(COP(=O)(OP(=O)(OCC1OC(C(C1OP(=O)(O)O)O)n1cnc2c1ncnc2N)O)O)(C)C)O	1,4-Dihydroxy-2-naphthoyl-CoA	1468002384	C15547			FDB030192|Abalone; Abiyuch; Acerola; Acorn; Adzuki bean; Agar; Agave; Alaska blueberry; Alaska wild rhubarb; Alfalfa; Allium (Onion); Allspice; Almond; Alpine sweetvetch; Amaranth; American butterfish; American cranberry; American pokeweed; Angelica; Anise; Annual wild rice; Apple; Apricot; Arctic blackberry; Arrowhead; Arrowroot; Asian pear; Asparagus; Atlantic herring; Avocado; Babassu palm; Ba…	O=C(NCCSC(=O)c1cc(O)c2c(c1O)cccc2)CCNC(=O)C(C(COP(=O)(OP(=O)(OCC1OC(C(C1OP(=O)(O)O)O)n1cnc2c1ncnc2N)O)O)(C)C)O	1
O95573	ACSL3_HUMAN	6.2.1.3	1569836305	BS279,33607|RHEA: 33608,Metrxn:68516,OLEICFATPtc,rxn32459|rxn32444|rxn32438|rxn25734|rxn12282|rxn32436,MNXR122919,RXN-9644|RXN-9644,RXN0-7239,HMR_2961|HMR_2959|HMR_0267|HMR_0263	6.2.1A2(rev)	Oleoyl-CoA	1467871766	C00510	CCCCCCCCC=CCCCCCCCC(=O)SCCNC(=O)CCNC(=O)C(C(COP(=O)(OP(=O)(OCC1OC(C(C1OP(=O)(O)O)O)n1cnc2c1ncnc2N)O)O)(C)C)O	(2E)-Octadecenoyl-CoA	1468008283	C16218			FDB023960|Abalone; Abiyuch; Acerola; Acorn; Adzuki bean; Agar; Agave; Alaska blueberry; Alaska wild rhubarb; Alfalfa; Allium (Onion); Allspice; Almond; Alpine sweetvetch; Amaranth; American butterfish; American cranberry; American pokeweed; Angelica; Anise; Annual wild rice; Apple; Apricot; Arctic blackberry; Arrowhead; Arrowroot; Asian pear; Asparagus; Atlantic herring; Avocado; Babassu palm; Ba…	CCCCCCCCCCCCCCCC=CC(=O)SCCNC(=O)CCNC(=O)C(C(COP(=O)(OP(=O)(OCC1OC(C(C1OP(=O)(O)O)O)n1cnc2c1ncnc2N)O)O)(C)C)O	1
O95573	ACSL3_HUMAN	6.2.1.3	1569818701	33615|RHEA: 33616,Metrxn:127777,OCDCAFATPc|FACOAL180,rxn37341|rxn37338|rxn37333|rxn37328|rxn09449|rxn08454,MNXR102141|MNXR99164,RXN-16380,HMR_2957|HMR_0249	6.2.1A2(rev)	Stearoyl-CoA	1467870680	C00412	CCCCCCCCCCCCCCCCCC(=O)SCCNC(=O)CCNC(=O)C(C(COP(=O)(OP(=O)(OCC1OC(C(C1OP(=O)(O)O)O)n1cnc2c1ncnc2N)O)O)(C)C)O	Phenoxyacetyl-CoA	1467889837	C02577				O=C(NCCSC(=O)COc1ccccc1)CCNC(=O)C(C(COP(=O)(OP(=O)(OCC1OC(C(C1OP(=O)(O)O)O)n1cnc2c1ncnc2N)O)O)(C)C)O	1
O95573	ACSL3_HUMAN	6.2.1.3	1569836305	BS279,33607|RHEA: 33608,Metrxn:68516,OLEICFATPtc,rxn32459|rxn32444|rxn32438|rxn25734|rxn12282|rxn32436,MNXR122919,RXN-9644|RXN-9644,RXN0-7239,HMR_2961|HMR_2959|HMR_0267|HMR_0263	6.2.1A2(rev)	Oleoyl-CoA	1467871766	C00510	CCCCCCCCC=CCCCCCCCC(=O)SCCNC(=O)CCNC(=O)C(C(COP(=O)(OP(=O)(OCC1OC(C(C1OP(=O)(O)O)O)n1cnc2c1ncnc2N)O)O)(C)C)O	(+)-7-Isojasmonic acid CoA	1468009486	C16339			FDB030948|Abalone; Abiyuch; Acerola; Acorn; Adzuki bean; Agar; Agave; Alaska blueberry; Alaska wild rhubarb; Alfalfa; Allium (Onion); Allspice; Almond; Alpine sweetvetch; Amaranth; American butterfish; American cranberry; American pokeweed; Angelica; Anise; Annual wild rice; Apple; Apricot; Arctic blackberry; Arrowhead; Arrowroot; Asian pear; Asparagus; Atlantic herring; Avocado; Babassu palm; Ba…	CCC=CCC1C(CCC1=O)CC(=O)SCCNC(=O)CCNC(=O)C(C(COP(=O)(OP(=O)(OCC1OC(C(C1OP(=O)(O)O)O)n1cnc2c1ncnc2N)O)O)(C)C)O	1
O95573	ACSL3_HUMAN	6.2.1.3	1569836305	BS279,33607|RHEA: 33608,Metrxn:68516,OLEICFATPtc,rxn32459|rxn32444|rxn32438|rxn25734|rxn12282|rxn32436,MNXR122919,RXN-9644|RXN-9644,RXN0-7239,HMR_2961|HMR_2959|HMR_0267|HMR_0263	6.2.1A2(rev)	Oleoyl-CoA	1467871766	C00510	CCCCCCCCC=CCCCCCCCC(=O)SCCNC(=O)CCNC(=O)C(C(COP(=O)(OP(=O)(OCC1OC(C(C1OP(=O)(O)O)O)n1cnc2c1ncnc2N)O)O)(C)C)O	Tetracosenoyl-CoA	1468011314	C16532			FDB030177|Abalone; Abiyuch; Acerola; Acorn; Adzuki bean; Agar; Agave; Alaska blueberry; Alaska wild rhubarb; Alfalfa; Allium (Onion); Allspice; Almond; Alpine sweetvetch; Amaranth; American butterfish; American cranberry; American pokeweed; Angelica; Anise; Annual wild rice; Apple; Apricot; Arctic blackberry; Arrowhead; Arrowroot; Asian pear; Asparagus; Atlantic herring; Avocado; Babassu palm; Ba…	CCCCCCCCC=CCCCCCCCCCCCCCC(=O)SCCNC(=O)CCNC(=O)C(C(COP(=O)(OP(=O)(OCC1OC(C(C1OP(=O)(O)O)O)n1cnc2c1ncnc2N)O)O)(C)C)O	1
O95573	ACSL3_HUMAN	6.2.1.3	1569818701	33615|RHEA: 33616,Metrxn:127777,OCDCAFATPc|FACOAL180,rxn37341|rxn37338|rxn37333|rxn37328|rxn09449|rxn08454,MNXR102141|MNXR99164,RXN-16380,HMR_2957|HMR_0249	6.2.1A2(rev)	Stearoyl-CoA	1467870680	C00412	CCCCCCCCCCCCCCCCCC(=O)SCCNC(=O)CCNC(=O)C(C(COP(=O)(OP(=O)(OCC1OC(C(C1OP(=O)(O)O)O)n1cnc2c1ncnc2N)O)O)(C)C)O	(E,E)-Piperoyl-CoA	1467890029	C02611				O=C(NCCSC(=O)C=CC=Cc1ccc2c(c1)OCO2)CCNC(=O)C(C(COP(=O)(OP(=O)(OCC1OC(C(C1OP(=O)(O)O)O)n1cnc2c1ncnc2N)O)O)(C)C)O	1
O95573	ACSL3_HUMAN	6.2.1.3	1569836305	BS279,33607|RHEA: 33608,Metrxn:68516,OLEICFATPtc,rxn32459|rxn32444|rxn32438|rxn25734|rxn12282|rxn32436,MNXR122919,RXN-9644|RXN-9644,RXN0-7239,HMR_2961|HMR_2959|HMR_0267|HMR_0263	6.2.1A2(rev)	Oleoyl-CoA	1467871766	C00510	CCCCCCCCC=CCCCCCCCC(=O)SCCNC(=O)CCNC(=O)C(C(COP(=O)(OP(=O)(OCC1OC(C(C1OP(=O)(O)O)O)n1cnc2c1ncnc2N)O)O)(C)C)O	3-Oxo-5,6-dehydrosuberyl-CoA	1468041592	C19945			FDB030454|Abalone; Abiyuch; Acerola; Acorn; Adzuki bean; Agar; Agave; Alaska blueberry; Alaska wild rhubarb; Alfalfa; Allium (Onion); Allspice; Almond; Alpine sweetvetch; Amaranth; American butterfish; American cranberry; American pokeweed; Angelica; Anise; Annual wild rice; Apple; Apricot; Arctic blackberry; Arrowhead; Arrowroot; Asian pear; Asparagus; Atlantic herring; Avocado; Babassu palm; Ba…	O=C(NCCSC(=O)CC(=O)CC=CCC(=O)O)CCNC(=O)C(C(COP(=O)(OP(=O)(OCC1OC(C(C1OP(=O)(O)O)O)n1cnc2c1ncnc2N)O)O)(C)C)O	1
O95573	ACSL3_HUMAN	6.2.1.3	1569836305	BS279,33607|RHEA: 33608,Metrxn:68516,OLEICFATPtc,rxn32459|rxn32444|rxn32438|rxn25734|rxn12282|rxn32436,MNXR122919,RXN-9644|RXN-9644,RXN0-7239,HMR_2961|HMR_2959|HMR_0267|HMR_0263	6.2.1A2(rev)	Oleoyl-CoA	1467871766	C00510	CCCCCCCCC=CCCCCCCCC(=O)SCCNC(=O)CCNC(=O)C(C(COP(=O)(OP(=O)(OCC1OC(C(C1OP(=O)(O)O)O)n1cnc2c1ncnc2N)O)O)(C)C)O	(25S)-3-Oxocholest-4-en-26-oyl-CoA	1468048293	C20840			FDB030459|Abalone; Abiyuch; Acerola; Acorn; Adzuki bean; Agar; Agave; Alaska blueberry; Alaska wild rhubarb; Alfalfa; Allium (Onion); Allspice; Almond; Alpine sweetvetch; Amaranth; American butterfish; American cranberry; American pokeweed; Angelica; Anise; Annual wild rice; Apple; Apricot; Arctic blackberry; Arrowhead; Arrowroot; Asian pear; Asparagus; Atlantic herring; Avocado; Babassu palm; Ba…	CC(C(C(=O)NCCC(=O)NCCSC(=O)C(CCCC(C1CCC2C1(C)CCC1C2CCC2=CC(=O)CCC12C)C)C)O)(COP(=O)(OP(=O)(OCC1OC(C(C1OP(=O)(O)O)O)n1cnc2c1ncnc2N)O)O)C	1
O95573	ACSL3_HUMAN	6.2.1.3	1569818701	33615|RHEA: 33616,Metrxn:127777,OCDCAFATPc|FACOAL180,rxn37341|rxn37338|rxn37333|rxn37328|rxn09449|rxn08454,MNXR102141|MNXR99164,RXN-16380,HMR_2957|HMR_0249	6.2.1A2(rev)	Stearoyl-CoA	1467870680	C00412	CCCCCCCCCCCCCCCCCC(=O)SCCNC(=O)CCNC(=O)C(C(COP(=O)(OP(=O)(OCC1OC(C(C1OP(=O)(O)O)O)n1cnc2c1ncnc2N)O)O)(C)C)O	2-Fluorobenzoyl-CoA	1467891355	C02784				O=C(NCCSC(=O)c1ccccc1F)CCNC(=O)C(C(COP(=O)(OP(=O)(OCC1OC(C(C1OP(=O)(O)O)O)n1cnc2c1ncnc2N)O)O)(C)C)O	1
O95573	ACSL3_HUMAN	6.2.1.3	1569818701	33615|RHEA: 33616,Metrxn:127777,OCDCAFATPc|FACOAL180,rxn37341|rxn37338|rxn37333|rxn37328|rxn09449|rxn08454,MNXR102141|MNXR99164,RXN-16380,HMR_2957|HMR_0249	6.2.1A2(rev)	Stearoyl-CoA	1467870680	C00412	CCCCCCCCCCCCCCCCCC(=O)SCCNC(=O)CCNC(=O)C(C(COP(=O)(OP(=O)(OCC1OC(C(C1OP(=O)(O)O)O)n1cnc2c1ncnc2N)O)O)(C)C)O	3-Fluorobenzoyl-CoA	1467891411	C02792				O=C(NCCSC(=O)c1cccc(c1)F)CCNC(=O)C(C(COP(=O)(OP(=O)(OCC1OC(C(C1OP(=O)(O)O)O)n1cnc2c1ncnc2N)O)O)(C)C)O	1
O95573	ACSL3_HUMAN	6.2.1.3	1569818701	33615|RHEA: 33616,Metrxn:127777,OCDCAFATPc|FACOAL180,rxn37341|rxn37338|rxn37333|rxn37328|rxn09449|rxn08454,MNXR102141|MNXR99164,RXN-16380,HMR_2957|HMR_0249	6.2.1A2(rev)	Stearoyl-CoA	1467870680	C00412	CCCCCCCCCCCCCCCCCC(=O)SCCNC(=O)CCNC(=O)C(C(COP(=O)(OP(=O)(OCC1OC(C(C1OP(=O)(O)O)O)n1cnc2c1ncnc2N)O)O)(C)C)O	4-Fluorobenzoyl-CoA	1467891493	C02802				O=C(NCCSC(=O)c1ccc(cc1)F)CCNC(=O)C(C(COP(=O)(OP(=O)(OCC1OC(C(C1OP(=O)(O)O)O)n1cnc2c1ncnc2N)O)O)(C)C)O	1
O95573	ACSL3_HUMAN	6.2.1.3	1569818701	33615|RHEA: 33616,Metrxn:127777,OCDCAFATPc|FACOAL180,rxn37341|rxn37338|rxn37333|rxn37328|rxn09449|rxn08454,MNXR102141|MNXR99164,RXN-16380,HMR_2957|HMR_0249	6.2.1A2(rev)	Stearoyl-CoA	1467870680	C00412	CCCCCCCCCCCCCCCCCC(=O)SCCNC(=O)CCNC(=O)C(C(COP(=O)(OP(=O)(OCC1OC(C(C1OP(=O)(O)O)O)n1cnc2c1ncnc2N)O)O)(C)C)O	3-cis-Dodecenoyl-CoA	1467892493	C02944			FDB023353|	CCCCCCCCC=CCC(=O)SCCNC(=O)CCNC(=O)C(C(COP(=O)(OP(=O)(OCC1OC(C(C1OP(=O)(O)O)O)n1cnc2c1ncnc2N)O)O)(C)C)O	1
O95573	ACSL3_HUMAN	6.2.1.3	1569818701	33615|RHEA: 33616,Metrxn:127777,OCDCAFATPc|FACOAL180,rxn37341|rxn37338|rxn37333|rxn37328|rxn09449|rxn08454,MNXR102141|MNXR99164,RXN-16380,HMR_2957|HMR_0249	6.2.1A2(rev)	Stearoyl-CoA	1467870680	C00412	CCCCCCCCCCCCCCCCCC(=O)SCCNC(=O)CCNC(=O)C(C(COP(=O)(OP(=O)(OCC1OC(C(C1OP(=O)(O)O)O)n1cnc2c1ncnc2N)O)O)(C)C)O	gamma-Linolenoyl-CoA	1467893192	C03035			FDB023905|	CCCCCC=CCC=CCC=CCCCCC(=O)SCCNC(=O)CCNC(=O)C(C(COP(=O)(OP(=O)(OCC1OC(C(C1OP(=O)(O)O)O)n1cnc2c1ncnc2N)O)O)(C)C)O	1
O95573	ACSL3_HUMAN	6.2.1.3	1569880463	46208|RHEA: 46209,Metrxn:127779,FACOAL200,rxn37339|rxn37334|rxn37329|rxn37325|rxn37323,MNXR128464,HMR_2966|HMR_0283	6.2.1A2(rev)	Eicosanoyl-CoA	1467885719	C02041	CCCCCCCCCCCCCCCCCCCC(=O)SCCNC(=O)CCNC(=O)C(C(COP(=O)(OP(=O)(OCC1OC(C(C1OP(=O)(O)O)O)n1cnc2c1ncnc2N)O)O)(C)C)O	Eicosanoyl-CoA	1467885719	C02041			FDB023354|	CCCCCCCCCCCCCCCCCCCC(=O)SCCNC(=O)CCNC(=O)C(C(COP(=O)(OP(=O)(OCC1OC(C(C1OP(=O)(O)O)O)n1cnc2c1ncnc2N)O)O)(C)C)O	1
O95573	ACSL3_HUMAN	6.2.1.3	1569818701	33615|RHEA: 33616,Metrxn:127777,OCDCAFATPc|FACOAL180,rxn37341|rxn37338|rxn37333|rxn37328|rxn09449|rxn08454,MNXR102141|MNXR99164,RXN-16380,HMR_2957|HMR_0249	6.2.1A2(rev)	Stearoyl-CoA	1467870680	C00412	CCCCCCCCCCCCCCCCCC(=O)SCCNC(=O)CCNC(=O)C(C(COP(=O)(OP(=O)(OCC1OC(C(C1OP(=O)(O)O)O)n1cnc2c1ncnc2N)O)O)(C)C)O	2-Hydroxyglutaryl-CoA	1467893384	C03058				O=C(NCCSC(=O)C(CCC(=O)O)O)CCNC(=O)C(C(COP(=O)(OP(=O)(OCC1OC(C(C1OP(=O)(O)O)O)n1cnc2c1ncnc2N)O)O)(C)C)O	1
O95573	ACSL3_HUMAN	6.2.1.3	1569880463	46208|RHEA: 46209,Metrxn:127779,FACOAL200,rxn37339|rxn37334|rxn37329|rxn37325|rxn37323,MNXR128464,HMR_2966|HMR_0283	6.2.1A2(rev)	Eicosanoyl-CoA	1467885719	C02041	CCCCCCCCCCCCCCCCCCCC(=O)SCCNC(=O)CCNC(=O)C(C(COP(=O)(OP(=O)(OCC1OC(C(C1OP(=O)(O)O)O)n1cnc2c1ncnc2N)O)O)(C)C)O	Phytanoyl-CoA	1467885878	C02060			FDB022577|	CC(CC(=O)SCCNC(=O)CCNC(=O)C(C(COP(=O)(OP(=O)(OCC1OC(C(C1OP(=O)(O)O)O)n1cnc2c1ncnc2N)O)O)(C)C)O)CCCC(CCCC(CCCC(C)C)C)C	1
O95573	ACSL3_HUMAN	6.2.1.3	1569818701	33615|RHEA: 33616,Metrxn:127777,OCDCAFATPc|FACOAL180,rxn37341|rxn37338|rxn37333|rxn37328|rxn09449|rxn08454,MNXR102141|MNXR99164,RXN-16380,HMR_2957|HMR_0249	6.2.1A2(rev)	Stearoyl-CoA	1467870680	C00412	CCCCCCCCCCCCCCCCCC(=O)SCCNC(=O)CCNC(=O)C(C(COP(=O)(OP(=O)(OCC1OC(C(C1OP(=O)(O)O)O)n1cnc2c1ncnc2N)O)O)(C)C)O	2-trans-Dodecenoyl-CoA	1467894642	C03221			FDB023218|	CCCCCCCCCC=CC(=O)SCCNC(=O)CCNC(=O)C(C(COP(=O)(OP(=O)(OCC1OC(C(C1OP(=O)(O)O)O)n1cnc2c1ncnc2N)O)O)(C)C)O	1
O95573	ACSL3_HUMAN	6.2.1.3	1569880463	46208|RHEA: 46209,Metrxn:127779,FACOAL200,rxn37339|rxn37334|rxn37329|rxn37325|rxn37323,MNXR128464,HMR_2966|HMR_0283	6.2.1A2(rev)	Eicosanoyl-CoA	1467885719	C02041	CCCCCCCCCCCCCCCCCCCC(=O)SCCNC(=O)CCNC(=O)C(C(COP(=O)(OP(=O)(OCC1OC(C(C1OP(=O)(O)O)O)n1cnc2c1ncnc2N)O)O)(C)C)O	Anthraniloyl-CoA	1467887423	C02247				O=C(NCCSC(=O)c1ccccc1N)CCNC(=O)C(C(COP(=O)(OP(=O)(OCC1OC(C(C1OP(=O)(O)O)O)n1cnc2c1ncnc2N)O)O)(C)C)O	1
O95573	ACSL3_HUMAN	6.2.1.3	1569880463	46208|RHEA: 46209,Metrxn:127779,FACOAL200,rxn37339|rxn37334|rxn37329|rxn37325|rxn37323,MNXR128464,HMR_2966|HMR_0283	6.2.1A2(rev)	Eicosanoyl-CoA	1467885719	C02041	CCCCCCCCCCCCCCCCCCCC(=O)SCCNC(=O)CCNC(=O)C(C(COP(=O)(OP(=O)(OCC1OC(C(C1OP(=O)(O)O)O)n1cnc2c1ncnc2N)O)O)(C)C)O	Arachidonyl-CoA	1467887441	C02249			FDB023270|	CCCCCC=CCC=CCC=CCC=CCCCC(=O)SCCNC(=O)CCNC(=O)C(C(COP(=O)(OP(=O)(OCC1OC(C(C1OP(=O)(O)O)O)n1cnc2c1ncnc2N)O)O)(C)C)O	1
O95573	ACSL3_HUMAN	6.2.1.3	1569818701	33615|RHEA: 33616,Metrxn:127777,OCDCAFATPc|FACOAL180,rxn37341|rxn37338|rxn37333|rxn37328|rxn09449|rxn08454,MNXR102141|MNXR99164,RXN-16380,HMR_2957|HMR_0249	6.2.1A2(rev)	Stearoyl-CoA	1467870680	C00412	CCCCCCCCCCCCCCCCCC(=O)SCCNC(=O)CCNC(=O)C(C(COP(=O)(OP(=O)(OCC1OC(C(C1OP(=O)(O)O)O)n1cnc2c1ncnc2N)O)O)(C)C)O	5-Hydroxypentanoyl-CoA	1467894785	C03237				OCCCCC(=O)SCCNC(=O)CCNC(=O)C(C(COP(=O)(OP(=O)(OCC1OC(C(C1OP(=O)(O)O)O)n1cnc2c1ncnc2N)O)O)(C)C)O	1
O95573	ACSL3_HUMAN	6.2.1.3	1569880463	46208|RHEA: 46209,Metrxn:127779,FACOAL200,rxn37339|rxn37334|rxn37329|rxn37325|rxn37323,MNXR128464,HMR_2966|HMR_0283	6.2.1A2(rev)	Eicosanoyl-CoA	1467885719	C02041	CCCCCCCCCCCCCCCCCCCC(=O)SCCNC(=O)CCNC(=O)C(C(COP(=O)(OP(=O)(OCC1OC(C(C1OP(=O)(O)O)O)n1cnc2c1ncnc2N)O)O)(C)C)O	Vinylacetyl-CoA	1467888042	C02331				C=CCC(=O)SCCNC(=O)CCNC(=O)C(C(COP(=O)(OP(=O)(OCC1OC(C(C1OP(=O)(O)O)O)n1cnc2c1ncnc2N)O)O)(C)C)O	1
O95573	ACSL3_HUMAN	6.2.1.3	1569880463	46208|RHEA: 46209,Metrxn:127779,FACOAL200,rxn37339|rxn37334|rxn37329|rxn37325|rxn37323,MNXR128464,HMR_2966|HMR_0283	6.2.1A2(rev)	Eicosanoyl-CoA	1467885719	C02041	CCCCCCCCCCCCCCCCCCCC(=O)SCCNC(=O)CCNC(=O)C(C(COP(=O)(OP(=O)(OCC1OC(C(C1OP(=O)(O)O)O)n1cnc2c1ncnc2N)O)O)(C)C)O	beta-Alanyl-CoA	1467888083	C02335			FDB024091|	NCCC(=O)SCCNC(=O)CCNC(=O)C(C(COP(=O)(OP(=O)(OCC1OC(C(C1OP(=O)(O)O)O)n1cnc2c1ncnc2N)O)O)(C)C)O	1
O95573	ACSL3_HUMAN	6.2.1.3	1569818701	33615|RHEA: 33616,Metrxn:127777,OCDCAFATPc|FACOAL180,rxn37341|rxn37338|rxn37333|rxn37328|rxn09449|rxn08454,MNXR102141|MNXR99164,RXN-16380,HMR_2957|HMR_0249	6.2.1A2(rev)	Stearoyl-CoA	1467870680	C00412	CCCCCCCCCCCCCCCCCC(=O)SCCNC(=O)CCNC(=O)C(C(COP(=O)(OP(=O)(OCC1OC(C(C1OP(=O)(O)O)O)n1cnc2c1ncnc2N)O)O)(C)C)O	2-Methylbut-2-enoyl-CoA	1467895469	C03345			FDB022819|	CC=C(C(=O)SCCNC(=O)CCNC(=O)C(C(COP(=O)(OP(=O)(OCC1OC(C(C1OP(=O)(O)O)O)n1cnc2c1ncnc2N)O)O)(C)C)O)C	1
O95573	ACSL3_HUMAN	6.2.1.3	1569880463	46208|RHEA: 46209,Metrxn:127779,FACOAL200,rxn37339|rxn37334|rxn37329|rxn37325|rxn37323,MNXR128464,HMR_2966|HMR_0283	6.2.1A2(rev)	Eicosanoyl-CoA	1467885719	C02041	CCCCCCCCCCCCCCCCCCCC(=O)SCCNC(=O)CCNC(=O)C(C(COP(=O)(OP(=O)(OCC1OC(C(C1OP(=O)(O)O)O)n1cnc2c1ncnc2N)O)O)(C)C)O	Glutaconyl-1-CoA	1467888647	C02411			FDB022535|	O=C(NCCSC(=O)C=CCC(=O)O)CCNC(=O)C(C(COP(=O)(OP(=O)(OCC1OC(C(C1OP(=O)(O)O)O)n1cnc2c1ncnc2N)O)O)(C)C)O	1
O95573	ACSL3_HUMAN	6.2.1.3	1569818701	33615|RHEA: 33616,Metrxn:127777,OCDCAFATPc|FACOAL180,rxn37341|rxn37338|rxn37333|rxn37328|rxn09449|rxn08454,MNXR102141|MNXR99164,RXN-16380,HMR_2957|HMR_0249	6.2.1A2(rev)	Stearoyl-CoA	1467870680	C00412	CCCCCCCCCCCCCCCCCC(=O)SCCNC(=O)CCNC(=O)C(C(COP(=O)(OP(=O)(OCC1OC(C(C1OP(=O)(O)O)O)n1cnc2c1ncnc2N)O)O)(C)C)O	4-Acetamidobutanoyl-CoA	1467895565	C03357				O=C(NCCSC(=O)CCCNC(=O)C)CCNC(=O)C(C(COP(=O)(OP(=O)(OCC1OC(C(C1OP(=O)(O)O)O)n1cnc2c1ncnc2N)O)O)(C)C)O	1
O95573	ACSL3_HUMAN	6.2.1.3	1569880463	46208|RHEA: 46209,Metrxn:127779,FACOAL200,rxn37339|rxn37334|rxn37329|rxn37325|rxn37323,MNXR128464,HMR_2966|HMR_0283	6.2.1A2(rev)	Eicosanoyl-CoA	1467885719	C02041	CCCCCCCCCCCCCCCCCCCC(=O)SCCNC(=O)CCNC(=O)C(C(COP(=O)(OP(=O)(OCC1OC(C(C1OP(=O)(O)O)O)n1cnc2c1ncnc2N)O)O)(C)C)O	Pent-2-enoyl-CoA	1467888846	C02451				CCC=CC(=O)SCCNC(=O)CCNC(=O)C(C(COP(=O)(OP(=O)(OCC1OC(C(C1OP(=O)(O)O)O)n1cnc2c1ncnc2N)O)O)(C)C)O	1
O95573	ACSL3_HUMAN	6.2.1.3	1569880463	46208|RHEA: 46209,Metrxn:127779,FACOAL200,rxn37339|rxn37334|rxn37329|rxn37325|rxn37323,MNXR128464,HMR_2966|HMR_0283	6.2.1A2(rev)	Eicosanoyl-CoA	1467885719	C02041	CCCCCCCCCCCCCCCCCCCC(=O)SCCNC(=O)CCNC(=O)C(C(COP(=O)(OP(=O)(OCC1OC(C(C1OP(=O)(O)O)O)n1cnc2c1ncnc2N)O)O)(C)C)O	Phenoxyacetyl-CoA	1467889837	C02577				O=C(NCCSC(=O)COc1ccccc1)CCNC(=O)C(C(COP(=O)(OP(=O)(OCC1OC(C(C1OP(=O)(O)O)O)n1cnc2c1ncnc2N)O)O)(C)C)O	1
O95573	ACSL3_HUMAN	6.2.1.3	1569818701	33615|RHEA: 33616,Metrxn:127777,OCDCAFATPc|FACOAL180,rxn37341|rxn37338|rxn37333|rxn37328|rxn09449|rxn08454,MNXR102141|MNXR99164,RXN-16380,HMR_2957|HMR_0249	6.2.1A2(rev)	Stearoyl-CoA	1467870680	C00412	CCCCCCCCCCCCCCCCCC(=O)SCCNC(=O)CCNC(=O)C(C(COP(=O)(OP(=O)(OCC1OC(C(C1OP(=O)(O)O)O)n1cnc2c1ncnc2N)O)O)(C)C)O	2-Methylprop-2-enoyl-CoA	1467896214	C03460		ChEMBLE_NTD	FDB022369|	O=C(NCCSC(=O)C(=C)C)CCNC(=O)C(C(COP(=O)(OP(=O)(OCC1OC(C(C1OP(=O)(O)O)O)n1cnc2c1ncnc2N)O)O)(C)C)O	1
O95573	ACSL3_HUMAN	6.2.1.3	1569880463	46208|RHEA: 46209,Metrxn:127779,FACOAL200,rxn37339|rxn37334|rxn37329|rxn37325|rxn37323,MNXR128464,HMR_2966|HMR_0283	6.2.1A2(rev)	Eicosanoyl-CoA	1467885719	C02041	CCCCCCCCCCCCCCCCCCCC(=O)SCCNC(=O)CCNC(=O)C(C(COP(=O)(OP(=O)(OCC1OC(C(C1OP(=O)(O)O)O)n1cnc2c1ncnc2N)O)O)(C)C)O	(E,E)-Piperoyl-CoA	1467890029	C02611				O=C(NCCSC(=O)C=CC=Cc1ccc2c(c1)OCO2)CCNC(=O)C(C(COP(=O)(OP(=O)(OCC1OC(C(C1OP(=O)(O)O)O)n1cnc2c1ncnc2N)O)O)(C)C)O	1
O95573	ACSL3_HUMAN	6.2.1.3	1569818701	33615|RHEA: 33616,Metrxn:127777,OCDCAFATPc|FACOAL180,rxn37341|rxn37338|rxn37333|rxn37328|rxn09449|rxn08454,MNXR102141|MNXR99164,RXN-16380,HMR_2957|HMR_0249	6.2.1A2(rev)	Stearoyl-CoA	1467870680	C00412	CCCCCCCCCCCCCCCCCC(=O)SCCNC(=O)CCNC(=O)C(C(COP(=O)(OP(=O)(OCC1OC(C(C1OP(=O)(O)O)O)n1cnc2c1ncnc2N)O)O)(C)C)O	3-Methyl-vinylacetyl-CoA	1467896270	C03466				CC(=C)CC(=O)SCCNC(=O)CCNC(=O)C(C(COP(=O)(OP(=O)(OCC1OC(C(C1OP(=O)(O)O)O)n1cnc2c1ncnc2N)O)O)(C)C)O	1
O95573	ACSL3_HUMAN	6.2.1.3	1569880463	46208|RHEA: 46209,Metrxn:127779,FACOAL200,rxn37339|rxn37334|rxn37329|rxn37325|rxn37323,MNXR128464,HMR_2966|HMR_0283	6.2.1A2(rev)	Eicosanoyl-CoA	1467885719	C02041	CCCCCCCCCCCCCCCCCCCC(=O)SCCNC(=O)CCNC(=O)C(C(COP(=O)(OP(=O)(OCC1OC(C(C1OP(=O)(O)O)O)n1cnc2c1ncnc2N)O)O)(C)C)O	2-Fluorobenzoyl-CoA	1467891355	C02784				O=C(NCCSC(=O)c1ccccc1F)CCNC(=O)C(C(COP(=O)(OP(=O)(OCC1OC(C(C1OP(=O)(O)O)O)n1cnc2c1ncnc2N)O)O)(C)C)O	1
O95573	ACSL3_HUMAN	6.2.1.3	1569880463	46208|RHEA: 46209,Metrxn:127779,FACOAL200,rxn37339|rxn37334|rxn37329|rxn37325|rxn37323,MNXR128464,HMR_2966|HMR_0283	6.2.1A2(rev)	Eicosanoyl-CoA	1467885719	C02041	CCCCCCCCCCCCCCCCCCCC(=O)SCCNC(=O)CCNC(=O)C(C(COP(=O)(OP(=O)(OCC1OC(C(C1OP(=O)(O)O)O)n1cnc2c1ncnc2N)O)O)(C)C)O	3-Fluorobenzoyl-CoA	1467891411	C02792				O=C(NCCSC(=O)c1cccc(c1)F)CCNC(=O)C(C(COP(=O)(OP(=O)(OCC1OC(C(C1OP(=O)(O)O)O)n1cnc2c1ncnc2N)O)O)(C)C)O	1
O95573	ACSL3_HUMAN	6.2.1.3	1569818701	33615|RHEA: 33616,Metrxn:127777,OCDCAFATPc|FACOAL180,rxn37341|rxn37338|rxn37333|rxn37328|rxn09449|rxn08454,MNXR102141|MNXR99164,RXN-16380,HMR_2957|HMR_0249	6.2.1A2(rev)	Stearoyl-CoA	1467870680	C00412	CCCCCCCCCCCCCCCCCC(=O)SCCNC(=O)CCNC(=O)C(C(COP(=O)(OP(=O)(OCC1OC(C(C1OP(=O)(O)O)O)n1cnc2c1ncnc2N)O)O)(C)C)O	7-Methyl-3-oxooctanoyl-CoA	1467897801	C03685				CC(CCCC(=O)CC(=O)SCCNC(=O)CCNC(=O)C(C(COP(=O)(OP(=O)(OCC1OC(C(C1OP(=O)(O)O)O)n1cnc2c1ncnc2N)O)O)(C)C)O)C	1
O95573	ACSL3_HUMAN	6.2.1.3	1569880463	46208|RHEA: 46209,Metrxn:127779,FACOAL200,rxn37339|rxn37334|rxn37329|rxn37325|rxn37323,MNXR128464,HMR_2966|HMR_0283	6.2.1A2(rev)	Eicosanoyl-CoA	1467885719	C02041	CCCCCCCCCCCCCCCCCCCC(=O)SCCNC(=O)CCNC(=O)C(C(COP(=O)(OP(=O)(OCC1OC(C(C1OP(=O)(O)O)O)n1cnc2c1ncnc2N)O)O)(C)C)O	4-Fluorobenzoyl-CoA	1467891493	C02802				O=C(NCCSC(=O)c1ccc(cc1)F)CCNC(=O)C(C(COP(=O)(OP(=O)(OCC1OC(C(C1OP(=O)(O)O)O)n1cnc2c1ncnc2N)O)O)(C)C)O	1
O95573	ACSL3_HUMAN	6.2.1.3	1569880463	46208|RHEA: 46209,Metrxn:127779,FACOAL200,rxn37339|rxn37334|rxn37329|rxn37325|rxn37323,MNXR128464,HMR_2966|HMR_0283	6.2.1A2(rev)	Eicosanoyl-CoA	1467885719	C02041	CCCCCCCCCCCCCCCCCCCC(=O)SCCNC(=O)CCNC(=O)C(C(COP(=O)(OP(=O)(OCC1OC(C(C1OP(=O)(O)O)O)n1cnc2c1ncnc2N)O)O)(C)C)O	3-cis-Dodecenoyl-CoA	1467892493	C02944			FDB023353|	CCCCCCCCC=CCC(=O)SCCNC(=O)CCNC(=O)C(C(COP(=O)(OP(=O)(OCC1OC(C(C1OP(=O)(O)O)O)n1cnc2c1ncnc2N)O)O)(C)C)O	1
O95573	ACSL3_HUMAN	6.2.1.3	1569818701	33615|RHEA: 33616,Metrxn:127777,OCDCAFATPc|FACOAL180,rxn37341|rxn37338|rxn37333|rxn37328|rxn09449|rxn08454,MNXR102141|MNXR99164,RXN-16380,HMR_2957|HMR_0249	6.2.1A2(rev)	Stearoyl-CoA	1467870680	C00412	CCCCCCCCCCCCCCCCCC(=O)SCCNC(=O)CCNC(=O)C(C(COP(=O)(OP(=O)(OCC1OC(C(C1OP(=O)(O)O)O)n1cnc2c1ncnc2N)O)O)(C)C)O	S-(5-Hydroxy-2-furoyl)-CoA	1467898038	C03724				O=C(NCCSC(=O)c1ccc(o1)O)CCNC(=O)C(C(COP(=O)(OP(=O)(OCC1OC(C(C1OP(=O)(O)O)O)n1cnc2c1ncnc2N)O)O)(C)C)O	1
O95573	ACSL3_HUMAN	6.2.1.3	1569880463	46208|RHEA: 46209,Metrxn:127779,FACOAL200,rxn37339|rxn37334|rxn37329|rxn37325|rxn37323,MNXR128464,HMR_2966|HMR_0283	6.2.1A2(rev)	Eicosanoyl-CoA	1467885719	C02041	CCCCCCCCCCCCCCCCCCCC(=O)SCCNC(=O)CCNC(=O)C(C(COP(=O)(OP(=O)(OCC1OC(C(C1OP(=O)(O)O)O)n1cnc2c1ncnc2N)O)O)(C)C)O	gamma-Linolenoyl-CoA	1467893192	C03035			FDB023905|	CCCCCC=CCC=CCC=CCCCCC(=O)SCCNC(=O)CCNC(=O)C(C(COP(=O)(OP(=O)(OCC1OC(C(C1OP(=O)(O)O)O)n1cnc2c1ncnc2N)O)O)(C)C)O	1
O95573	ACSL3_HUMAN	6.2.1.3	1569818701	33615|RHEA: 33616,Metrxn:127777,OCDCAFATPc|FACOAL180,rxn37341|rxn37338|rxn37333|rxn37328|rxn09449|rxn08454,MNXR102141|MNXR99164,RXN-16380,HMR_2957|HMR_0249	6.2.1A2(rev)	Stearoyl-CoA	1467870680	C00412	CCCCCCCCCCCCCCCCCC(=O)SCCNC(=O)CCNC(=O)C(C(COP(=O)(OP(=O)(OCC1OC(C(C1OP(=O)(O)O)O)n1cnc2c1ncnc2N)O)O)(C)C)O	3-Hydroxy-2-methylpropanoyl-CoA	1467900231	C04047,C06000			FDB022393|	OCC(C(=O)SCCNC(=O)CCNC(=O)C(C(COP(=O)(OP(=O)(OCC1OC(C(C1OP(=O)(O)O)O)n1cnc2c1ncnc2N)O)O)(C)C)O)C	1
O95573	ACSL3_HUMAN	6.2.1.3	1569880463	46208|RHEA: 46209,Metrxn:127779,FACOAL200,rxn37339|rxn37334|rxn37329|rxn37325|rxn37323,MNXR128464,HMR_2966|HMR_0283	6.2.1A2(rev)	Eicosanoyl-CoA	1467885719	C02041	CCCCCCCCCCCCCCCCCCCC(=O)SCCNC(=O)CCNC(=O)C(C(COP(=O)(OP(=O)(OCC1OC(C(C1OP(=O)(O)O)O)n1cnc2c1ncnc2N)O)O)(C)C)O	2-Hydroxyglutaryl-CoA	1467893384	C03058				O=C(NCCSC(=O)C(CCC(=O)O)O)CCNC(=O)C(C(COP(=O)(OP(=O)(OCC1OC(C(C1OP(=O)(O)O)O)n1cnc2c1ncnc2N)O)O)(C)C)O	1
O95573	ACSL3_HUMAN	6.2.1.3	1569818701	33615|RHEA: 33616,Metrxn:127777,OCDCAFATPc|FACOAL180,rxn37341|rxn37338|rxn37333|rxn37328|rxn09449|rxn08454,MNXR102141|MNXR99164,RXN-16380,HMR_2957|HMR_0249	6.2.1A2(rev)	Stearoyl-CoA	1467870680	C00412	CCCCCCCCCCCCCCCCCC(=O)SCCNC(=O)CCNC(=O)C(C(COP(=O)(OP(=O)(OCC1OC(C(C1OP(=O)(O)O)O)n1cnc2c1ncnc2N)O)O)(C)C)O	(1-Hydroxycyclohexan-1-yl)acetyl-CoA	1467902183	C04316				O=C(NCCSC(=O)CC1(O)CCCCC1)CCNC(=O)C(C(COP(=O)(OP(=O)(OCC1OC(C(C1OP(=O)(O)O)O)n1cnc2c1ncnc2N)O)O)(C)C)O	1
O95573	ACSL3_HUMAN	6.2.1.3	1569880463	46208|RHEA: 46209,Metrxn:127779,FACOAL200,rxn37339|rxn37334|rxn37329|rxn37325|rxn37323,MNXR128464,HMR_2966|HMR_0283	6.2.1A2(rev)	Eicosanoyl-CoA	1467885719	C02041	CCCCCCCCCCCCCCCCCCCC(=O)SCCNC(=O)CCNC(=O)C(C(COP(=O)(OP(=O)(OCC1OC(C(C1OP(=O)(O)O)O)n1cnc2c1ncnc2N)O)O)(C)C)O	2-trans-Dodecenoyl-CoA	1467894642	C03221			FDB023218|	CCCCCCCCCC=CC(=O)SCCNC(=O)CCNC(=O)C(C(COP(=O)(OP(=O)(OCC1OC(C(C1OP(=O)(O)O)O)n1cnc2c1ncnc2N)O)O)(C)C)O	1
O95573	ACSL3_HUMAN	6.2.1.3	1569818701	33615|RHEA: 33616,Metrxn:127777,OCDCAFATPc|FACOAL180,rxn37341|rxn37338|rxn37333|rxn37328|rxn09449|rxn08454,MNXR102141|MNXR99164,RXN-16380,HMR_2957|HMR_0249	6.2.1A2(rev)	Stearoyl-CoA	1467870680	C00412	CCCCCCCCCCCCCCCCCC(=O)SCCNC(=O)CCNC(=O)C(C(COP(=O)(OP(=O)(OCC1OC(C(C1OP(=O)(O)O)O)n1cnc2c1ncnc2N)O)O)(C)C)O	L-Malyl-CoA	1467902381	C04348,C20747			FDB022374|	O=C(NCCSC(=O)CC(C(=O)O)O)CCNC(=O)C(C(COP(=O)(OP(=O)(OCC1OC(C(C1OP(=O)(O)O)O)n1cnc2c1ncnc2N)O)O)(C)C)O	1
O95573	ACSL3_HUMAN	6.2.1.3	1569880463	46208|RHEA: 46209,Metrxn:127779,FACOAL200,rxn37339|rxn37334|rxn37329|rxn37325|rxn37323,MNXR128464,HMR_2966|HMR_0283	6.2.1A2(rev)	Eicosanoyl-CoA	1467885719	C02041	CCCCCCCCCCCCCCCCCCCC(=O)SCCNC(=O)CCNC(=O)C(C(COP(=O)(OP(=O)(OCC1OC(C(C1OP(=O)(O)O)O)n1cnc2c1ncnc2N)O)O)(C)C)O	5-Hydroxypentanoyl-CoA	1467894785	C03237				OCCCCC(=O)SCCNC(=O)CCNC(=O)C(C(COP(=O)(OP(=O)(OCC1OC(C(C1OP(=O)(O)O)O)n1cnc2c1ncnc2N)O)O)(C)C)O	1
O95573	ACSL3_HUMAN	6.2.1.3	1569880463	46208|RHEA: 46209,Metrxn:127779,FACOAL200,rxn37339|rxn37334|rxn37329|rxn37325|rxn37323,MNXR128464,HMR_2966|HMR_0283	6.2.1A2(rev)	Eicosanoyl-CoA	1467885719	C02041	CCCCCCCCCCCCCCCCCCCC(=O)SCCNC(=O)CCNC(=O)C(C(COP(=O)(OP(=O)(OCC1OC(C(C1OP(=O)(O)O)O)n1cnc2c1ncnc2N)O)O)(C)C)O	2-Methylbut-2-enoyl-CoA	1467895469	C03345			FDB022819|	CC=C(C(=O)SCCNC(=O)CCNC(=O)C(C(COP(=O)(OP(=O)(OCC1OC(C(C1OP(=O)(O)O)O)n1cnc2c1ncnc2N)O)O)(C)C)O)C	1
Q9H773	DCTP1_HUMAN	3.6.1.12	1569832649	BS141404,Metrxn:68769,rxn32714|rxn09013,RXN0-384	3.6.1A1(rev)	dATP	1467867300	C00131	OC1CC(OC1COP(=O)(OP(=O)(OP(=O)(O)[O-])[O-])[O-])n1cnc2c1ncnc2N	dATP	1467867300	C00131	DB03222,EXPT01288	CHEMBL335538	FDB022674|Abalone; Abiyuch; Acerola; Acorn; Adzuki bean; Agar; Agave; Alaska blueberry; Alaska wild rhubarb; Alfalfa; Allium (Onion); Allspice; Almond; Alpine sweetvetch; Amaranth; American butterfish; American cranberry; American pokeweed; Angelica; Anise; Annual wild rice; Apple; Apricot; Arctic blackberry; Arrowhead; Arrowroot; Asian pear; Asparagus; Atlantic herring; Avocado; Babassu palm; Ba…	OC1CC(OC1COP(=O)(OP(=O)(OP(=O)(O)[O-])[O-])[O-])n1cnc2c1ncnc2N	1
O95573	ACSL3_HUMAN	6.2.1.3	1569818701	33615|RHEA: 33616,Metrxn:127777,OCDCAFATPc|FACOAL180,rxn37341|rxn37338|rxn37333|rxn37328|rxn09449|rxn08454,MNXR102141|MNXR99164,RXN-16380,HMR_2957|HMR_0249	6.2.1A2(rev)	Stearoyl-CoA	1467870680	C00412	CCCCCCCCCCCCCCCCCC(=O)SCCNC(=O)CCNC(=O)C(C(COP(=O)(OP(=O)(OCC1OC(C(C1OP(=O)(O)O)O)n1cnc2c1ncnc2N)O)O)(C)C)O	2-Amino-5-oxocyclohex-1-enecarbonyl-CoA	1467907482	C05165				O=C(NCCSC(=O)C1=C(N)CCC(=O)C1)CCNC(=O)C(C(COP(=O)(OP(=O)(OCC1OC(C(C1OP(=O)(O)O)O)n1cnc2c1ncnc2N)O)O)(C)C)O	1
O95573	ACSL3_HUMAN	6.2.1.3	1569880463	46208|RHEA: 46209,Metrxn:127779,FACOAL200,rxn37339|rxn37334|rxn37329|rxn37325|rxn37323,MNXR128464,HMR_2966|HMR_0283	6.2.1A2(rev)	Eicosanoyl-CoA	1467885719	C02041	CCCCCCCCCCCCCCCCCCCC(=O)SCCNC(=O)CCNC(=O)C(C(COP(=O)(OP(=O)(OCC1OC(C(C1OP(=O)(O)O)O)n1cnc2c1ncnc2N)O)O)(C)C)O	4-Acetamidobutanoyl-CoA	1467895565	C03357				O=C(NCCSC(=O)CCCNC(=O)C)CCNC(=O)C(C(COP(=O)(OP(=O)(OCC1OC(C(C1OP(=O)(O)O)O)n1cnc2c1ncnc2N)O)O)(C)C)O	1
O95573	ACSL3_HUMAN	6.2.1.3	1569818701	33615|RHEA: 33616,Metrxn:127777,OCDCAFATPc|FACOAL180,rxn37341|rxn37338|rxn37333|rxn37328|rxn09449|rxn08454,MNXR102141|MNXR99164,RXN-16380,HMR_2957|HMR_0249	6.2.1A2(rev)	Stearoyl-CoA	1467870680	C00412	CCCCCCCCCCCCCCCCCC(=O)SCCNC(=O)CCNC(=O)C(C(COP(=O)(OP(=O)(OCC1OC(C(C1OP(=O)(O)O)O)n1cnc2c1ncnc2N)O)O)(C)C)O	3-Hydroxybenzoyl-CoA	1467907657	C05195				O=C(NCCSC(=O)c1cccc(c1)O)CCNC(=O)C(C(COP(=O)(OP(=O)(OCC1OC(C(C1OP(=O)(O)O)O)n1cnc2c1ncnc2N)O)O)(C)C)O	1
O95573	ACSL3_HUMAN	6.2.1.3	1569880463	46208|RHEA: 46209,Metrxn:127779,FACOAL200,rxn37339|rxn37334|rxn37329|rxn37325|rxn37323,MNXR128464,HMR_2966|HMR_0283	6.2.1A2(rev)	Eicosanoyl-CoA	1467885719	C02041	CCCCCCCCCCCCCCCCCCCC(=O)SCCNC(=O)CCNC(=O)C(C(COP(=O)(OP(=O)(OCC1OC(C(C1OP(=O)(O)O)O)n1cnc2c1ncnc2N)O)O)(C)C)O	2-Methylprop-2-enoyl-CoA	1467896214	C03460		ChEMBLE_NTD	FDB022369|	O=C(NCCSC(=O)C(=C)C)CCNC(=O)C(C(COP(=O)(OP(=O)(OCC1OC(C(C1OP(=O)(O)O)O)n1cnc2c1ncnc2N)O)O)(C)C)O	1
O95573	ACSL3_HUMAN	6.2.1.3	1569818701	33615|RHEA: 33616,Metrxn:127777,OCDCAFATPc|FACOAL180,rxn37341|rxn37338|rxn37333|rxn37328|rxn09449|rxn08454,MNXR102141|MNXR99164,RXN-16380,HMR_2957|HMR_0249	6.2.1A2(rev)	Stearoyl-CoA	1467870680	C00412	CCCCCCCCCCCCCCCCCC(=O)SCCNC(=O)CCNC(=O)C(C(COP(=O)(OP(=O)(OCC1OC(C(C1OP(=O)(O)O)O)n1cnc2c1ncnc2N)O)O)(C)C)O	(S)-3-Hydroxyhexadecanoyl-CoA	1467907975	C05258			FDB023251|	CCCCCCCCCCCCCC(CC(=O)SCCNC(=O)CCNC(=O)C(C(COP(=O)(OP(=O)(OCC1OC(C(C1OP(=O)(O)O)O)n1cnc2c1ncnc2N)O)O)(C)C)O)O	1
O95573	ACSL3_HUMAN	6.2.1.3	1569880463	46208|RHEA: 46209,Metrxn:127779,FACOAL200,rxn37339|rxn37334|rxn37329|rxn37325|rxn37323,MNXR128464,HMR_2966|HMR_0283	6.2.1A2(rev)	Eicosanoyl-CoA	1467885719	C02041	CCCCCCCCCCCCCCCCCCCC(=O)SCCNC(=O)CCNC(=O)C(C(COP(=O)(OP(=O)(OCC1OC(C(C1OP(=O)(O)O)O)n1cnc2c1ncnc2N)O)O)(C)C)O	3-Methyl-vinylacetyl-CoA	1467896270	C03466				CC(=C)CC(=O)SCCNC(=O)CCNC(=O)C(C(COP(=O)(OP(=O)(OCC1OC(C(C1OP(=O)(O)O)O)n1cnc2c1ncnc2N)O)O)(C)C)O	1
O95573	ACSL3_HUMAN	6.2.1.3	1569818701	33615|RHEA: 33616,Metrxn:127777,OCDCAFATPc|FACOAL180,rxn37341|rxn37338|rxn37333|rxn37328|rxn09449|rxn08454,MNXR102141|MNXR99164,RXN-16380,HMR_2957|HMR_0249	6.2.1A2(rev)	Stearoyl-CoA	1467870680	C00412	CCCCCCCCCCCCCCCCCC(=O)SCCNC(=O)CCNC(=O)C(C(COP(=O)(OP(=O)(OCC1OC(C(C1OP(=O)(O)O)O)n1cnc2c1ncnc2N)O)O)(C)C)O	3-Oxopalmitoyl-CoA	1467907985	C05259			FDB023908|	CCCCCCCCCCCCCC(=O)CC(=O)SCCNC(=O)CCNC(=O)C(C(COP(=O)(OP(=O)(OCC1OC(C(C1OP(=O)(O)O)O)n1cnc2c1ncnc2N)O)O)(C)C)O	1
O95573	ACSL3_HUMAN	6.2.1.3	1569880463	46208|RHEA: 46209,Metrxn:127779,FACOAL200,rxn37339|rxn37334|rxn37329|rxn37325|rxn37323,MNXR128464,HMR_2966|HMR_0283	6.2.1A2(rev)	Eicosanoyl-CoA	1467885719	C02041	CCCCCCCCCCCCCCCCCCCC(=O)SCCNC(=O)CCNC(=O)C(C(COP(=O)(OP(=O)(OCC1OC(C(C1OP(=O)(O)O)O)n1cnc2c1ncnc2N)O)O)(C)C)O	7-Methyl-3-oxooctanoyl-CoA	1467897801	C03685				CC(CCCC(=O)CC(=O)SCCNC(=O)CCNC(=O)C(C(COP(=O)(OP(=O)(OCC1OC(C(C1OP(=O)(O)O)O)n1cnc2c1ncnc2N)O)O)(C)C)O)C	1
O95573	ACSL3_HUMAN	6.2.1.3	1569818701	33615|RHEA: 33616,Metrxn:127777,OCDCAFATPc|FACOAL180,rxn37341|rxn37338|rxn37333|rxn37328|rxn09449|rxn08454,MNXR102141|MNXR99164,RXN-16380,HMR_2957|HMR_0249	6.2.1A2(rev)	Stearoyl-CoA	1467870680	C00412	CCCCCCCCCCCCCCCCCC(=O)SCCNC(=O)CCNC(=O)C(C(COP(=O)(OP(=O)(OCC1OC(C(C1OP(=O)(O)O)O)n1cnc2c1ncnc2N)O)O)(C)C)O	(S)-3-Hydroxytetradecanoyl-CoA	1467907997	C05260			FDB023253|	CCCCCCCCCCCC(CC(=O)SCCNC(=O)CCNC(=O)C(C(COP(=O)(OP(=O)(OCC1OC(C(C1OP(=O)(O)O)O)n1cnc2c1ncnc2N)O)O)(C)C)O)O	1
O95573	ACSL3_HUMAN	6.2.1.3	1569880463	46208|RHEA: 46209,Metrxn:127779,FACOAL200,rxn37339|rxn37334|rxn37329|rxn37325|rxn37323,MNXR128464,HMR_2966|HMR_0283	6.2.1A2(rev)	Eicosanoyl-CoA	1467885719	C02041	CCCCCCCCCCCCCCCCCCCC(=O)SCCNC(=O)CCNC(=O)C(C(COP(=O)(OP(=O)(OCC1OC(C(C1OP(=O)(O)O)O)n1cnc2c1ncnc2N)O)O)(C)C)O	S-(5-Hydroxy-2-furoyl)-CoA	1467898038	C03724				O=C(NCCSC(=O)c1ccc(o1)O)CCNC(=O)C(C(COP(=O)(OP(=O)(OCC1OC(C(C1OP(=O)(O)O)O)n1cnc2c1ncnc2N)O)O)(C)C)O	1
O95573	ACSL3_HUMAN	6.2.1.3	1569818701	33615|RHEA: 33616,Metrxn:127777,OCDCAFATPc|FACOAL180,rxn37341|rxn37338|rxn37333|rxn37328|rxn09449|rxn08454,MNXR102141|MNXR99164,RXN-16380,HMR_2957|HMR_0249	6.2.1A2(rev)	Stearoyl-CoA	1467870680	C00412	CCCCCCCCCCCCCCCCCC(=O)SCCNC(=O)CCNC(=O)C(C(COP(=O)(OP(=O)(OCC1OC(C(C1OP(=O)(O)O)O)n1cnc2c1ncnc2N)O)O)(C)C)O	3-Oxotetradecanoyl-CoA	1467908007	C05261			FDB023254|	CCCCCCCCCCCC(=O)CC(=O)SCCNC(=O)CCNC(=O)C(C(COP(=O)(OP(=O)(OCC1OC(C(C1OP(=O)(O)O)O)n1cnc2c1ncnc2N)O)O)(C)C)O	1
O95573	ACSL3_HUMAN	6.2.1.3	1569880463	46208|RHEA: 46209,Metrxn:127779,FACOAL200,rxn37339|rxn37334|rxn37329|rxn37325|rxn37323,MNXR128464,HMR_2966|HMR_0283	6.2.1A2(rev)	Eicosanoyl-CoA	1467885719	C02041	CCCCCCCCCCCCCCCCCCCC(=O)SCCNC(=O)CCNC(=O)C(C(COP(=O)(OP(=O)(OCC1OC(C(C1OP(=O)(O)O)O)n1cnc2c1ncnc2N)O)O)(C)C)O	3-Hydroxy-2-methylpropanoyl-CoA	1467900231	C04047,C06000			FDB022393|	OCC(C(=O)SCCNC(=O)CCNC(=O)C(C(COP(=O)(OP(=O)(OCC1OC(C(C1OP(=O)(O)O)O)n1cnc2c1ncnc2N)O)O)(C)C)O)C	1
O95573	ACSL3_HUMAN	6.2.1.3	1569818701	33615|RHEA: 33616,Metrxn:127777,OCDCAFATPc|FACOAL180,rxn37341|rxn37338|rxn37333|rxn37328|rxn09449|rxn08454,MNXR102141|MNXR99164,RXN-16380,HMR_2957|HMR_0249	6.2.1A2(rev)	Stearoyl-CoA	1467870680	C00412	CCCCCCCCCCCCCCCCCC(=O)SCCNC(=O)CCNC(=O)C(C(COP(=O)(OP(=O)(OCC1OC(C(C1OP(=O)(O)O)O)n1cnc2c1ncnc2N)O)O)(C)C)O	(S)-3-Hydroxydodecanoyl-CoA	1467908016	C05262			FDB023255|	CCCCCCCCCC(CC(=O)SCCNC(=O)CCNC(=O)C(C(COP(=O)(OP(=O)(OCC1OC(C(C1OP(=O)(O)O)O)n1cnc2c1ncnc2N)O)O)(C)C)O)O	1
O95573	ACSL3_HUMAN	6.2.1.3	1569880463	46208|RHEA: 46209,Metrxn:127779,FACOAL200,rxn37339|rxn37334|rxn37329|rxn37325|rxn37323,MNXR128464,HMR_2966|HMR_0283	6.2.1A2(rev)	Eicosanoyl-CoA	1467885719	C02041	CCCCCCCCCCCCCCCCCCCC(=O)SCCNC(=O)CCNC(=O)C(C(COP(=O)(OP(=O)(OCC1OC(C(C1OP(=O)(O)O)O)n1cnc2c1ncnc2N)O)O)(C)C)O	(1-Hydroxycyclohexan-1-yl)acetyl-CoA	1467902183	C04316				O=C(NCCSC(=O)CC1(O)CCCCC1)CCNC(=O)C(C(COP(=O)(OP(=O)(OCC1OC(C(C1OP(=O)(O)O)O)n1cnc2c1ncnc2N)O)O)(C)C)O	1
O95573	ACSL3_HUMAN	6.2.1.3	1569818701	33615|RHEA: 33616,Metrxn:127777,OCDCAFATPc|FACOAL180,rxn37341|rxn37338|rxn37333|rxn37328|rxn09449|rxn08454,MNXR102141|MNXR99164,RXN-16380,HMR_2957|HMR_0249	6.2.1A2(rev)	Stearoyl-CoA	1467870680	C00412	CCCCCCCCCCCCCCCCCC(=O)SCCNC(=O)CCNC(=O)C(C(COP(=O)(OP(=O)(OCC1OC(C(C1OP(=O)(O)O)O)n1cnc2c1ncnc2N)O)O)(C)C)O	3-Oxododecanoyl-CoA	1467908027	C05263			FDB023256|	CCCCCCCCCC(=O)CC(=O)SCCNC(=O)CCNC(=O)C(C(COP(=O)(OP(=O)(OCC1OC(C(C1OP(=O)(O)O)O)n1cnc2c1ncnc2N)O)O)(C)C)O	1
O95573	ACSL3_HUMAN	6.2.1.3	1569880463	46208|RHEA: 46209,Metrxn:127779,FACOAL200,rxn37339|rxn37334|rxn37329|rxn37325|rxn37323,MNXR128464,HMR_2966|HMR_0283	6.2.1A2(rev)	Eicosanoyl-CoA	1467885719	C02041	CCCCCCCCCCCCCCCCCCCC(=O)SCCNC(=O)CCNC(=O)C(C(COP(=O)(OP(=O)(OCC1OC(C(C1OP(=O)(O)O)O)n1cnc2c1ncnc2N)O)O)(C)C)O	L-Malyl-CoA	1467902381	C04348,C20747			FDB022374|	O=C(NCCSC(=O)CC(C(=O)O)O)CCNC(=O)C(C(COP(=O)(OP(=O)(OCC1OC(C(C1OP(=O)(O)O)O)n1cnc2c1ncnc2N)O)O)(C)C)O	1
O95573	ACSL3_HUMAN	6.2.1.3	1569818701	33615|RHEA: 33616,Metrxn:127777,OCDCAFATPc|FACOAL180,rxn37341|rxn37338|rxn37333|rxn37328|rxn09449|rxn08454,MNXR102141|MNXR99164,RXN-16380,HMR_2957|HMR_0249	6.2.1A2(rev)	Stearoyl-CoA	1467870680	C00412	CCCCCCCCCCCCCCCCCC(=O)SCCNC(=O)CCNC(=O)C(C(COP(=O)(OP(=O)(OCC1OC(C(C1OP(=O)(O)O)O)n1cnc2c1ncnc2N)O)O)(C)C)O	(S)-Hydroxydecanoyl-CoA	1467908038	C05264			FDB023257|	CCCCCCCC(CC(=O)SCCNC(=O)CCNC(=O)C(C(COP(=O)(OP(=O)(OCC1OC(C(C1OP(=O)(O)O)O)n1cnc2c1ncnc2N)O)O)(C)C)O)O	1
O95573	ACSL3_HUMAN	6.2.1.3	1569880463	46208|RHEA: 46209,Metrxn:127779,FACOAL200,rxn37339|rxn37334|rxn37329|rxn37325|rxn37323,MNXR128464,HMR_2966|HMR_0283	6.2.1A2(rev)	Eicosanoyl-CoA	1467885719	C02041	CCCCCCCCCCCCCCCCCCCC(=O)SCCNC(=O)CCNC(=O)C(C(COP(=O)(OP(=O)(OCC1OC(C(C1OP(=O)(O)O)O)n1cnc2c1ncnc2N)O)O)(C)C)O	2-Amino-5-oxocyclohex-1-enecarbonyl-CoA	1467907482	C05165				O=C(NCCSC(=O)C1=C(N)CCC(=O)C1)CCNC(=O)C(C(COP(=O)(OP(=O)(OCC1OC(C(C1OP(=O)(O)O)O)n1cnc2c1ncnc2N)O)O)(C)C)O	1
Q9H773	DCTP1_HUMAN	3.6.1.12	1569832649	BS141404,Metrxn:68769,rxn32714|rxn09013,RXN0-384	3.6.1A1	dATP	1467867300	C00131	OC1CC(OC1COP(=O)(OP(=O)(OP(=O)(O)[O-])[O-])[O-])n1cnc2c1ncnc2N	dATP	1467867300	C00131	DB03222,EXPT01288	CHEMBL335538	FDB022674|Abalone; Abiyuch; Acerola; Acorn; Adzuki bean; Agar; Agave; Alaska blueberry; Alaska wild rhubarb; Alfalfa; Allium (Onion); Allspice; Almond; Alpine sweetvetch; Amaranth; American butterfish; American cranberry; American pokeweed; Angelica; Anise; Annual wild rice; Apple; Apricot; Arctic blackberry; Arrowhead; Arrowroot; Asian pear; Asparagus; Atlantic herring; Avocado; Babassu palm; Ba…	OC1CC(OC1COP(=O)(OP(=O)(OP(=O)(O)[O-])[O-])[O-])n1cnc2c1ncnc2N	1
O95573	ACSL3_HUMAN	6.2.1.3	1569818701	33615|RHEA: 33616,Metrxn:127777,OCDCAFATPc|FACOAL180,rxn37341|rxn37338|rxn37333|rxn37328|rxn09449|rxn08454,MNXR102141|MNXR99164,RXN-16380,HMR_2957|HMR_0249	6.2.1A2(rev)	Stearoyl-CoA	1467870680	C00412	CCCCCCCCCCCCCCCCCC(=O)SCCNC(=O)CCNC(=O)C(C(COP(=O)(OP(=O)(OCC1OC(C(C1OP(=O)(O)O)O)n1cnc2c1ncnc2N)O)O)(C)C)O	(S)-3-Hydroxyoctanoyl-CoA	1467908062	C05266,C05278		CHEMBL251720	FDB023259|	CCCCCC(CC(=O)SCCNC(=O)CCNC(=O)C(C(COP(=O)(OP(=O)(OCC1OC(C(C1OP(=O)(O)O)O)n1cnc2c1ncnc2N)O)O)(C)C)O)O	1
O95573	ACSL3_HUMAN	6.2.1.3	1569880463	46208|RHEA: 46209,Metrxn:127779,FACOAL200,rxn37339|rxn37334|rxn37329|rxn37325|rxn37323,MNXR128464,HMR_2966|HMR_0283	6.2.1A2(rev)	Eicosanoyl-CoA	1467885719	C02041	CCCCCCCCCCCCCCCCCCCC(=O)SCCNC(=O)CCNC(=O)C(C(COP(=O)(OP(=O)(OCC1OC(C(C1OP(=O)(O)O)O)n1cnc2c1ncnc2N)O)O)(C)C)O	3-Hydroxybenzoyl-CoA	1467907657	C05195				O=C(NCCSC(=O)c1cccc(c1)O)CCNC(=O)C(C(COP(=O)(OP(=O)(OCC1OC(C(C1OP(=O)(O)O)O)n1cnc2c1ncnc2N)O)O)(C)C)O	1
O95573	ACSL3_HUMAN	6.2.1.3	1569818701	33615|RHEA: 33616,Metrxn:127777,OCDCAFATPc|FACOAL180,rxn37341|rxn37338|rxn37333|rxn37328|rxn09449|rxn08454,MNXR102141|MNXR99164,RXN-16380,HMR_2957|HMR_0249	6.2.1A2(rev)	Stearoyl-CoA	1467870680	C00412	CCCCCCCCCCCCCCCCCC(=O)SCCNC(=O)CCNC(=O)C(C(COP(=O)(OP(=O)(OCC1OC(C(C1OP(=O)(O)O)O)n1cnc2c1ncnc2N)O)O)(C)C)O	3-Oxooctanoyl-CoA	1467908075	C05267			FDB023260|	CCCCCC(=O)CC(=O)SCCNC(=O)CCNC(=O)C(C(COP(=O)(OP(=O)(OCC1OC(C(C1OP(=O)(O)O)O)n1cnc2c1ncnc2N)O)O)(C)C)O	1
O95573	ACSL3_HUMAN	6.2.1.3	1569880463	46208|RHEA: 46209,Metrxn:127779,FACOAL200,rxn37339|rxn37334|rxn37329|rxn37325|rxn37323,MNXR128464,HMR_2966|HMR_0283	6.2.1A2(rev)	Eicosanoyl-CoA	1467885719	C02041	CCCCCCCCCCCCCCCCCCCC(=O)SCCNC(=O)CCNC(=O)C(C(COP(=O)(OP(=O)(OCC1OC(C(C1OP(=O)(O)O)O)n1cnc2c1ncnc2N)O)O)(C)C)O	(S)-3-Hydroxyhexadecanoyl-CoA	1467907975	C05258			FDB023251|	CCCCCCCCCCCCCC(CC(=O)SCCNC(=O)CCNC(=O)C(C(COP(=O)(OP(=O)(OCC1OC(C(C1OP(=O)(O)O)O)n1cnc2c1ncnc2N)O)O)(C)C)O)O	1
O95573	ACSL3_HUMAN	6.2.1.3	1569818701	33615|RHEA: 33616,Metrxn:127777,OCDCAFATPc|FACOAL180,rxn37341|rxn37338|rxn37333|rxn37328|rxn09449|rxn08454,MNXR102141|MNXR99164,RXN-16380,HMR_2957|HMR_0249	6.2.1A2(rev)	Stearoyl-CoA	1467870680	C00412	CCCCCCCCCCCCCCCCCC(=O)SCCNC(=O)CCNC(=O)C(C(COP(=O)(OP(=O)(OCC1OC(C(C1OP(=O)(O)O)O)n1cnc2c1ncnc2N)O)O)(C)C)O	(S)-Hydroxyhexanoyl-CoA	1467908086	C05268			FDB023261|	CCCC(CC(=O)SCCNC(=O)CCNC(=O)C(C(COP(=O)(OP(=O)(OCC1OC(C(C1OP(=O)(O)O)O)n1cnc2c1ncnc2N)O)O)(C)C)O)O	1
O95573	ACSL3_HUMAN	6.2.1.3	1569880463	46208|RHEA: 46209,Metrxn:127779,FACOAL200,rxn37339|rxn37334|rxn37329|rxn37325|rxn37323,MNXR128464,HMR_2966|HMR_0283	6.2.1A2(rev)	Eicosanoyl-CoA	1467885719	C02041	CCCCCCCCCCCCCCCCCCCC(=O)SCCNC(=O)CCNC(=O)C(C(COP(=O)(OP(=O)(OCC1OC(C(C1OP(=O)(O)O)O)n1cnc2c1ncnc2N)O)O)(C)C)O	3-Oxopalmitoyl-CoA	1467907985	C05259			FDB023908|	CCCCCCCCCCCCCC(=O)CC(=O)SCCNC(=O)CCNC(=O)C(C(COP(=O)(OP(=O)(OCC1OC(C(C1OP(=O)(O)O)O)n1cnc2c1ncnc2N)O)O)(C)C)O	1
O95573	ACSL3_HUMAN	6.2.1.3	1569818701	33615|RHEA: 33616,Metrxn:127777,OCDCAFATPc|FACOAL180,rxn37341|rxn37338|rxn37333|rxn37328|rxn09449|rxn08454,MNXR102141|MNXR99164,RXN-16380,HMR_2957|HMR_0249	6.2.1A2(rev)	Stearoyl-CoA	1467870680	C00412	CCCCCCCCCCCCCCCCCC(=O)SCCNC(=O)CCNC(=O)C(C(COP(=O)(OP(=O)(OCC1OC(C(C1OP(=O)(O)O)O)n1cnc2c1ncnc2N)O)O)(C)C)O	Hexanoyl-CoA	1467908112	C05270	DB02563,EXPT01799	CHEMBL1949895	FDB023074|	CCCCCC(=O)SCCNC(=O)CCNC(=O)C(C(COP(=O)(OP(=O)(OCC1OC(C(C1OP(=O)(O)O)O)n1cnc2c1ncnc2N)O)O)(C)C)O	1
O95573	ACSL3_HUMAN	6.2.1.3	1569880463	46208|RHEA: 46209,Metrxn:127779,FACOAL200,rxn37339|rxn37334|rxn37329|rxn37325|rxn37323,MNXR128464,HMR_2966|HMR_0283	6.2.1A2(rev)	Eicosanoyl-CoA	1467885719	C02041	CCCCCCCCCCCCCCCCCCCC(=O)SCCNC(=O)CCNC(=O)C(C(COP(=O)(OP(=O)(OCC1OC(C(C1OP(=O)(O)O)O)n1cnc2c1ncnc2N)O)O)(C)C)O	(S)-3-Hydroxytetradecanoyl-CoA	1467907997	C05260			FDB023253|	CCCCCCCCCCCC(CC(=O)SCCNC(=O)CCNC(=O)C(C(COP(=O)(OP(=O)(OCC1OC(C(C1OP(=O)(O)O)O)n1cnc2c1ncnc2N)O)O)(C)C)O)O	1
O95573	ACSL3_HUMAN	6.2.1.3	1569818701	33615|RHEA: 33616,Metrxn:127777,OCDCAFATPc|FACOAL180,rxn37341|rxn37338|rxn37333|rxn37328|rxn09449|rxn08454,MNXR102141|MNXR99164,RXN-16380,HMR_2957|HMR_0249	6.2.1A2(rev)	Stearoyl-CoA	1467870680	C00412	CCCCCCCCCCCCCCCCCC(=O)SCCNC(=O)CCNC(=O)C(C(COP(=O)(OP(=O)(OCC1OC(C(C1OP(=O)(O)O)O)n1cnc2c1ncnc2N)O)O)(C)C)O	trans-Hex-2-enoyl-CoA	1467908124	C05271			FDB023263|	CCCC=CC(=O)SCCNC(=O)CCNC(=O)C(C(COP(=O)(OP(=O)(OCC1OC(C(C1OP(=O)(O)O)O)n1cnc2c1ncnc2N)O)O)(C)C)O	1
O95573	ACSL3_HUMAN	6.2.1.3	1569880463	46208|RHEA: 46209,Metrxn:127779,FACOAL200,rxn37339|rxn37334|rxn37329|rxn37325|rxn37323,MNXR128464,HMR_2966|HMR_0283	6.2.1A2(rev)	Eicosanoyl-CoA	1467885719	C02041	CCCCCCCCCCCCCCCCCCCC(=O)SCCNC(=O)CCNC(=O)C(C(COP(=O)(OP(=O)(OCC1OC(C(C1OP(=O)(O)O)O)n1cnc2c1ncnc2N)O)O)(C)C)O	3-Oxotetradecanoyl-CoA	1467908007	C05261			FDB023254|	CCCCCCCCCCCC(=O)CC(=O)SCCNC(=O)CCNC(=O)C(C(COP(=O)(OP(=O)(OCC1OC(C(C1OP(=O)(O)O)O)n1cnc2c1ncnc2N)O)O)(C)C)O	1
O95573	ACSL3_HUMAN	6.2.1.3	1569818701	33615|RHEA: 33616,Metrxn:127777,OCDCAFATPc|FACOAL180,rxn37341|rxn37338|rxn37333|rxn37328|rxn09449|rxn08454,MNXR102141|MNXR99164,RXN-16380,HMR_2957|HMR_0249	6.2.1A2(rev)	Stearoyl-CoA	1467870680	C00412	CCCCCCCCCCCCCCCCCC(=O)SCCNC(=O)CCNC(=O)C(C(COP(=O)(OP(=O)(OCC1OC(C(C1OP(=O)(O)O)O)n1cnc2c1ncnc2N)O)O)(C)C)O	trans-Hexadec-2-enoyl-CoA	1467908137	C05272			FDB023264|	CCCCCCCCCCCCCC=CC(=O)SCCNC(=O)CCNC(=O)C(C(COP(=O)(OP(=O)(OCC1OC(C(C1OP(=O)(O)O)O)n1cnc2c1ncnc2N)O)O)(C)C)O	1
O95573	ACSL3_HUMAN	6.2.1.3	1569880463	46208|RHEA: 46209,Metrxn:127779,FACOAL200,rxn37339|rxn37334|rxn37329|rxn37325|rxn37323,MNXR128464,HMR_2966|HMR_0283	6.2.1A2(rev)	Eicosanoyl-CoA	1467885719	C02041	CCCCCCCCCCCCCCCCCCCC(=O)SCCNC(=O)CCNC(=O)C(C(COP(=O)(OP(=O)(OCC1OC(C(C1OP(=O)(O)O)O)n1cnc2c1ncnc2N)O)O)(C)C)O	(S)-3-Hydroxydodecanoyl-CoA	1467908016	C05262			FDB023255|	CCCCCCCCCC(CC(=O)SCCNC(=O)CCNC(=O)C(C(COP(=O)(OP(=O)(OCC1OC(C(C1OP(=O)(O)O)O)n1cnc2c1ncnc2N)O)O)(C)C)O)O	1
O95573	ACSL3_HUMAN	6.2.1.3	1569818701	33615|RHEA: 33616,Metrxn:127777,OCDCAFATPc|FACOAL180,rxn37341|rxn37338|rxn37333|rxn37328|rxn09449|rxn08454,MNXR102141|MNXR99164,RXN-16380,HMR_2957|HMR_0249	6.2.1A2(rev)	Stearoyl-CoA	1467870680	C00412	CCCCCCCCCCCCCCCCCC(=O)SCCNC(=O)CCNC(=O)C(C(COP(=O)(OP(=O)(OCC1OC(C(C1OP(=O)(O)O)O)n1cnc2c1ncnc2N)O)O)(C)C)O	trans-Tetradec-2-enoyl-CoA	1467908150	C05273			FDB023265|	CCCCCCCCCCCC=CC(=O)SCCNC(=O)CCNC(=O)C(C(COP(=O)(OP(=O)(OCC1OC(C(C1OP(=O)(O)O)O)n1cnc2c1ncnc2N)O)O)(C)C)O	1
O95573	ACSL3_HUMAN	6.2.1.3	1569880463	46208|RHEA: 46209,Metrxn:127779,FACOAL200,rxn37339|rxn37334|rxn37329|rxn37325|rxn37323,MNXR128464,HMR_2966|HMR_0283	6.2.1A2(rev)	Eicosanoyl-CoA	1467885719	C02041	CCCCCCCCCCCCCCCCCCCC(=O)SCCNC(=O)CCNC(=O)C(C(COP(=O)(OP(=O)(OCC1OC(C(C1OP(=O)(O)O)O)n1cnc2c1ncnc2N)O)O)(C)C)O	3-Oxododecanoyl-CoA	1467908027	C05263			FDB023256|	CCCCCCCCCC(=O)CC(=O)SCCNC(=O)CCNC(=O)C(C(COP(=O)(OP(=O)(OCC1OC(C(C1OP(=O)(O)O)O)n1cnc2c1ncnc2N)O)O)(C)C)O	1
O95573	ACSL3_HUMAN	6.2.1.3	1569818701	33615|RHEA: 33616,Metrxn:127777,OCDCAFATPc|FACOAL180,rxn37341|rxn37338|rxn37333|rxn37328|rxn09449|rxn08454,MNXR102141|MNXR99164,RXN-16380,HMR_2957|HMR_0249	6.2.1A2(rev)	Stearoyl-CoA	1467870680	C00412	CCCCCCCCCCCCCCCCCC(=O)SCCNC(=O)CCNC(=O)C(C(COP(=O)(OP(=O)(OCC1OC(C(C1OP(=O)(O)O)O)n1cnc2c1ncnc2N)O)O)(C)C)O	Decanoyl-CoA	1467908162	C05274		CHEMBL1949897	FDB023910|	CCCCCCCCCC(=O)SCCNC(=O)CCNC(=O)C(C(COP(=O)(OP(=O)(OCC1OC(C(C1OP(=O)(O)O)O)n1cnc2c1ncnc2N)O)O)(C)C)O	1
O95573	ACSL3_HUMAN	6.2.1.3	1569880463	46208|RHEA: 46209,Metrxn:127779,FACOAL200,rxn37339|rxn37334|rxn37329|rxn37325|rxn37323,MNXR128464,HMR_2966|HMR_0283	6.2.1A2(rev)	Eicosanoyl-CoA	1467885719	C02041	CCCCCCCCCCCCCCCCCCCC(=O)SCCNC(=O)CCNC(=O)C(C(COP(=O)(OP(=O)(OCC1OC(C(C1OP(=O)(O)O)O)n1cnc2c1ncnc2N)O)O)(C)C)O	(S)-Hydroxydecanoyl-CoA	1467908038	C05264			FDB023257|	CCCCCCCC(CC(=O)SCCNC(=O)CCNC(=O)C(C(COP(=O)(OP(=O)(OCC1OC(C(C1OP(=O)(O)O)O)n1cnc2c1ncnc2N)O)O)(C)C)O)O	1
O95573	ACSL3_HUMAN	6.2.1.3	1569818701	33615|RHEA: 33616,Metrxn:127777,OCDCAFATPc|FACOAL180,rxn37341|rxn37338|rxn37333|rxn37328|rxn09449|rxn08454,MNXR102141|MNXR99164,RXN-16380,HMR_2957|HMR_0249	6.2.1A2(rev)	Stearoyl-CoA	1467870680	C00412	CCCCCCCCCCCCCCCCCC(=O)SCCNC(=O)CCNC(=O)C(C(COP(=O)(OP(=O)(OCC1OC(C(C1OP(=O)(O)O)O)n1cnc2c1ncnc2N)O)O)(C)C)O	trans-Dec-2-enoyl-CoA	1467908174	C05275			FDB022536|	CCCCCCCC=CC(=O)SCCNC(=O)CCNC(=O)C(C(COP(=O)(OP(=O)(OCC1OC(C(C1OP(=O)(O)O)O)n1cnc2c1ncnc2N)O)O)(C)C)O	1
O95573	ACSL3_HUMAN	6.2.1.3	1569880463	46208|RHEA: 46209,Metrxn:127779,FACOAL200,rxn37339|rxn37334|rxn37329|rxn37325|rxn37323,MNXR128464,HMR_2966|HMR_0283	6.2.1A2(rev)	Eicosanoyl-CoA	1467885719	C02041	CCCCCCCCCCCCCCCCCCCC(=O)SCCNC(=O)CCNC(=O)C(C(COP(=O)(OP(=O)(OCC1OC(C(C1OP(=O)(O)O)O)n1cnc2c1ncnc2N)O)O)(C)C)O	(S)-3-Hydroxyoctanoyl-CoA	1467908062	C05266,C05278		CHEMBL251720	FDB023259|	CCCCCC(CC(=O)SCCNC(=O)CCNC(=O)C(C(COP(=O)(OP(=O)(OCC1OC(C(C1OP(=O)(O)O)O)n1cnc2c1ncnc2N)O)O)(C)C)O)O	1
Q96IV0	NGLY1_HUMAN	3.5.1.52	1569735304	R08707,rxn14348	3.5.1A1(rev)	N-Acetyl-beta-D-glucosaminylamine	1467879043	C01239	OCC1OC(N)C(C(C1O)O)NC(=O)C	N-Acetyl-beta-D-glucosaminylamine	1467879043	C01239			FDB022426|	OCC1OC(N)C(C(C1O)O)NC(=O)C	1
O95573	ACSL3_HUMAN	6.2.1.3	1569818701	33615|RHEA: 33616,Metrxn:127777,OCDCAFATPc|FACOAL180,rxn37341|rxn37338|rxn37333|rxn37328|rxn09449|rxn08454,MNXR102141|MNXR99164,RXN-16380,HMR_2957|HMR_0249	6.2.1A2(rev)	Stearoyl-CoA	1467870680	C00412	CCCCCCCCCCCCCCCCCC(=O)SCCNC(=O)CCNC(=O)C(C(COP(=O)(OP(=O)(OCC1OC(C(C1OP(=O)(O)O)O)n1cnc2c1ncnc2N)O)O)(C)C)O	trans,cis-Lauro-2,6-dienoyl-CoA	1467908207	C05279				CCCCCC=CCCC=CC(=O)SCCNC(=O)CCNC(=O)C(C(COP(=O)(OP(=O)(OCC1OC(C(C1OP(=O)(O)O)O)n1cnc2c1ncnc2N)O)O)(C)C)O	1
O95573	ACSL3_HUMAN	6.2.1.3	1569880463	46208|RHEA: 46209,Metrxn:127779,FACOAL200,rxn37339|rxn37334|rxn37329|rxn37325|rxn37323,MNXR128464,HMR_2966|HMR_0283	6.2.1A2(rev)	Eicosanoyl-CoA	1467885719	C02041	CCCCCCCCCCCCCCCCCCCC(=O)SCCNC(=O)CCNC(=O)C(C(COP(=O)(OP(=O)(OCC1OC(C(C1OP(=O)(O)O)O)n1cnc2c1ncnc2N)O)O)(C)C)O	3-Oxooctanoyl-CoA	1467908075	C05267			FDB023260|	CCCCCC(=O)CC(=O)SCCNC(=O)CCNC(=O)C(C(COP(=O)(OP(=O)(OCC1OC(C(C1OP(=O)(O)O)O)n1cnc2c1ncnc2N)O)O)(C)C)O	1
O95573	ACSL3_HUMAN	6.2.1.3	1569818701	33615|RHEA: 33616,Metrxn:127777,OCDCAFATPc|FACOAL180,rxn37341|rxn37338|rxn37333|rxn37328|rxn09449|rxn08454,MNXR102141|MNXR99164,RXN-16380,HMR_2957|HMR_0249	6.2.1A2(rev)	Stearoyl-CoA	1467870680	C00412	CCCCCCCCCCCCCCCCCC(=O)SCCNC(=O)CCNC(=O)C(C(COP(=O)(OP(=O)(OCC1OC(C(C1OP(=O)(O)O)O)n1cnc2c1ncnc2N)O)O)(C)C)O	cis,cis-3,6-Dodecadienoyl-CoA	1467908217	C05280			FDB023271|	CCCCCC=CCC=CCC(=O)SCCNC(=O)CCNC(=O)C(C(COP(=O)(OP(=O)(OCC1OC(C(C1OP(=O)(O)O)O)n1cnc2c1ncnc2N)O)O)(C)C)O	1
O95573	ACSL3_HUMAN	6.2.1.3	1569880463	46208|RHEA: 46209,Metrxn:127779,FACOAL200,rxn37339|rxn37334|rxn37329|rxn37325|rxn37323,MNXR128464,HMR_2966|HMR_0283	6.2.1A2(rev)	Eicosanoyl-CoA	1467885719	C02041	CCCCCCCCCCCCCCCCCCCC(=O)SCCNC(=O)CCNC(=O)C(C(COP(=O)(OP(=O)(OCC1OC(C(C1OP(=O)(O)O)O)n1cnc2c1ncnc2N)O)O)(C)C)O	(S)-Hydroxyhexanoyl-CoA	1467908086	C05268			FDB023261|	CCCC(CC(=O)SCCNC(=O)CCNC(=O)C(C(COP(=O)(OP(=O)(OCC1OC(C(C1OP(=O)(O)O)O)n1cnc2c1ncnc2N)O)O)(C)C)O)O	1
O95573	ACSL3_HUMAN	6.2.1.3	1569818701	33615|RHEA: 33616,Metrxn:127777,OCDCAFATPc|FACOAL180,rxn37341|rxn37338|rxn37333|rxn37328|rxn09449|rxn08454,MNXR102141|MNXR99164,RXN-16380,HMR_2957|HMR_0249	6.2.1A2(rev)	Stearoyl-CoA	1467870680	C00412	CCCCCCCCCCCCCCCCCC(=O)SCCNC(=O)CCNC(=O)C(C(COP(=O)(OP(=O)(OCC1OC(C(C1OP(=O)(O)O)O)n1cnc2c1ncnc2N)O)O)(C)C)O	Chenodeoxycholoyl-CoA	1467908690	C05337,C17689			FDB023880|	OC1CCC2(C(C1)CC(C1C2CCC2(C1CCC2C(CCC(=O)SCCNC(=O)CCNC(=O)C(C(COP(=O)(OP(=O)(OCC1OC(C(C1OP(=O)(O)O)O)n1cnc2c1ncnc2N)O)O)(C)C)O)C)C)O)C	1
O95573	ACSL3_HUMAN	6.2.1.3	1569880463	46208|RHEA: 46209,Metrxn:127779,FACOAL200,rxn37339|rxn37334|rxn37329|rxn37325|rxn37323,MNXR128464,HMR_2966|HMR_0283	6.2.1A2(rev)	Eicosanoyl-CoA	1467885719	C02041	CCCCCCCCCCCCCCCCCCCC(=O)SCCNC(=O)CCNC(=O)C(C(COP(=O)(OP(=O)(OCC1OC(C(C1OP(=O)(O)O)O)n1cnc2c1ncnc2N)O)O)(C)C)O	Hexanoyl-CoA	1467908112	C05270	DB02563,EXPT01799	CHEMBL1949895	FDB023074|	CCCCCC(=O)SCCNC(=O)CCNC(=O)C(C(COP(=O)(OP(=O)(OCC1OC(C(C1OP(=O)(O)O)O)n1cnc2c1ncnc2N)O)O)(C)C)O	1
O95573	ACSL3_HUMAN	6.2.1.3	1569818701	33615|RHEA: 33616,Metrxn:127777,OCDCAFATPc|FACOAL180,rxn37341|rxn37338|rxn37333|rxn37328|rxn09449|rxn08454,MNXR102141|MNXR99164,RXN-16380,HMR_2957|HMR_0249	6.2.1A2(rev)	Stearoyl-CoA	1467870680	C00412	CCCCCCCCCCCCCCCCCC(=O)SCCNC(=O)CCNC(=O)C(C(COP(=O)(OP(=O)(OCC1OC(C(C1OP(=O)(O)O)O)n1cnc2c1ncnc2N)O)O)(C)C)O	4-Hydroxyphenylacetyl-CoA	1467908701	C05338			FDB023275|	O=C(NCCSC(=O)Cc1ccc(cc1)O)CCNC(=O)C(C(COP(=O)(OP(=O)(OCC1OC(C(C1OP(=O)(O)O)O)n1cnc2c1ncnc2N)O)O)(C)C)O	1
O95573	ACSL3_HUMAN	6.2.1.3	1569880463	46208|RHEA: 46209,Metrxn:127779,FACOAL200,rxn37339|rxn37334|rxn37329|rxn37325|rxn37323,MNXR128464,HMR_2966|HMR_0283	6.2.1A2(rev)	Eicosanoyl-CoA	1467885719	C02041	CCCCCCCCCCCCCCCCCCCC(=O)SCCNC(=O)CCNC(=O)C(C(COP(=O)(OP(=O)(OCC1OC(C(C1OP(=O)(O)O)O)n1cnc2c1ncnc2N)O)O)(C)C)O	trans-Hex-2-enoyl-CoA	1467908124	C05271			FDB023263|	CCCC=CC(=O)SCCNC(=O)CCNC(=O)C(C(COP(=O)(OP(=O)(OCC1OC(C(C1OP(=O)(O)O)O)n1cnc2c1ncnc2N)O)O)(C)C)O	1
O95573	ACSL3_HUMAN	6.2.1.3	1569818701	33615|RHEA: 33616,Metrxn:127777,OCDCAFATPc|FACOAL180,rxn37341|rxn37338|rxn37333|rxn37328|rxn09449|rxn08454,MNXR102141|MNXR99164,RXN-16380,HMR_2957|HMR_0249	6.2.1A2(rev)	Stearoyl-CoA	1467870680	C00412	CCCCCCCCCCCCCCCCCC(=O)SCCNC(=O)CCNC(=O)C(C(COP(=O)(OP(=O)(OCC1OC(C(C1OP(=O)(O)O)O)n1cnc2c1ncnc2N)O)O)(C)C)O	(24E)-3alpha,7alpha-Dihydroxy-5beta-cholest-24-enoyl-CoA	1467909570	C05447			FDB024142|	OC1CCC2(C(C1)CC(C1C2CCC2(C1CCC2C(CCC=C(C(=O)SCCNC(=O)CCNC(=O)C(C(COP(=O)(OP(=O)(OCC1OC(C(C1OP(=O)(O)O)O)n1cnc2c1ncnc2N)O)O)(C)C)O)C)C)C)O)C	1
O95573	ACSL3_HUMAN	6.2.1.3	1569880463	46208|RHEA: 46209,Metrxn:127779,FACOAL200,rxn37339|rxn37334|rxn37329|rxn37325|rxn37323,MNXR128464,HMR_2966|HMR_0283	6.2.1A2(rev)	Eicosanoyl-CoA	1467885719	C02041	CCCCCCCCCCCCCCCCCCCC(=O)SCCNC(=O)CCNC(=O)C(C(COP(=O)(OP(=O)(OCC1OC(C(C1OP(=O)(O)O)O)n1cnc2c1ncnc2N)O)O)(C)C)O	trans-Hexadec-2-enoyl-CoA	1467908137	C05272			FDB023264|	CCCCCCCCCCCCCC=CC(=O)SCCNC(=O)CCNC(=O)C(C(COP(=O)(OP(=O)(OCC1OC(C(C1OP(=O)(O)O)O)n1cnc2c1ncnc2N)O)O)(C)C)O	1
O95573	ACSL3_HUMAN	6.2.1.3	1569818701	33615|RHEA: 33616,Metrxn:127777,OCDCAFATPc|FACOAL180,rxn37341|rxn37338|rxn37333|rxn37328|rxn09449|rxn08454,MNXR102141|MNXR99164,RXN-16380,HMR_2957|HMR_0249	6.2.1A2(rev)	Stearoyl-CoA	1467870680	C00412	CCCCCCCCCCCCCCCCCC(=O)SCCNC(=O)CCNC(=O)C(C(COP(=O)(OP(=O)(OCC1OC(C(C1OP(=O)(O)O)O)n1cnc2c1ncnc2N)O)O)(C)C)O	(24R,25R)-3alpha,7alpha,24-Trihydroxy-5beta-cholestanoyl-CoA	1467909581	C05448			FDB029072|	OC1CCC2(C(C1)CC(C1C2CCC2(C1CCC2C(CCC(C(C(=O)SCCNC(=O)CCNC(=O)C(C(COP(=O)(OP(=O)(OCC1OC(C(C1OP(=O)(O)O)O)n1cnc2c1ncnc2N)O)O)(C)C)O)C)O)C)C)O)C	1
O95573	ACSL3_HUMAN	6.2.1.3	1569880463	46208|RHEA: 46209,Metrxn:127779,FACOAL200,rxn37339|rxn37334|rxn37329|rxn37325|rxn37323,MNXR128464,HMR_2966|HMR_0283	6.2.1A2(rev)	Eicosanoyl-CoA	1467885719	C02041	CCCCCCCCCCCCCCCCCCCC(=O)SCCNC(=O)CCNC(=O)C(C(COP(=O)(OP(=O)(OCC1OC(C(C1OP(=O)(O)O)O)n1cnc2c1ncnc2N)O)O)(C)C)O	trans-Tetradec-2-enoyl-CoA	1467908150	C05273			FDB023265|	CCCCCCCCCCCC=CC(=O)SCCNC(=O)CCNC(=O)C(C(COP(=O)(OP(=O)(OCC1OC(C(C1OP(=O)(O)O)O)n1cnc2c1ncnc2N)O)O)(C)C)O	1
O95573	ACSL3_HUMAN	6.2.1.3	1569818701	33615|RHEA: 33616,Metrxn:127777,OCDCAFATPc|FACOAL180,rxn37341|rxn37338|rxn37333|rxn37328|rxn09449|rxn08454,MNXR102141|MNXR99164,RXN-16380,HMR_2957|HMR_0249	6.2.1A2(rev)	Stearoyl-CoA	1467870680	C00412	CCCCCCCCCCCCCCCCCC(=O)SCCNC(=O)CCNC(=O)C(C(COP(=O)(OP(=O)(OCC1OC(C(C1OP(=O)(O)O)O)n1cnc2c1ncnc2N)O)O)(C)C)O	3alpha,7alpha-Dihydroxy-5beta-24-oxocholestanoyl-CoA	1467909591	C05449			FDB024143|	OC1CCC2(C(C1)CC(C1C2CCC2(C1CCC2C(CCC(=O)C(C(=O)SCCNC(=O)CCNC(=O)C(C(COP(=O)(OP(=O)(OCC1OC(C(C1OP(=O)(O)O)O)n1cnc2c1ncnc2N)O)O)(C)C)O)C)C)C)O)C	1
O95573	ACSL3_HUMAN	6.2.1.3	1569880463	46208|RHEA: 46209,Metrxn:127779,FACOAL200,rxn37339|rxn37334|rxn37329|rxn37325|rxn37323,MNXR128464,HMR_2966|HMR_0283	6.2.1A2(rev)	Eicosanoyl-CoA	1467885719	C02041	CCCCCCCCCCCCCCCCCCCC(=O)SCCNC(=O)CCNC(=O)C(C(COP(=O)(OP(=O)(OCC1OC(C(C1OP(=O)(O)O)O)n1cnc2c1ncnc2N)O)O)(C)C)O	Decanoyl-CoA	1467908162	C05274		CHEMBL1949897	FDB023910|	CCCCCCCCCC(=O)SCCNC(=O)CCNC(=O)C(C(COP(=O)(OP(=O)(OCC1OC(C(C1OP(=O)(O)O)O)n1cnc2c1ncnc2N)O)O)(C)C)O	1
O95573	ACSL3_HUMAN	6.2.1.3	1569818701	33615|RHEA: 33616,Metrxn:127777,OCDCAFATPc|FACOAL180,rxn37341|rxn37338|rxn37333|rxn37328|rxn09449|rxn08454,MNXR102141|MNXR99164,RXN-16380,HMR_2957|HMR_0249	6.2.1A2(rev)	Stearoyl-CoA	1467870680	C00412	CCCCCCCCCCCCCCCCCC(=O)SCCNC(=O)CCNC(=O)C(C(COP(=O)(OP(=O)(OCC1OC(C(C1OP(=O)(O)O)O)n1cnc2c1ncnc2N)O)O)(C)C)O	3alpha,7alpha,12alpha,24-Tetrahydroxy-5beta-cholestanoyl-CoA	1467909602	C05450,C15614			FDB024137|	OC1CCC2(C(C1)CC(C1C2CC(O)C2(C1CCC2C(CCC(C(C(=O)SCCNC(=O)CCNC(=O)C(C(COP(=O)(OP(=O)(OCC1OC(C(C1OP(=O)(O)O)O)n1cnc2c1ncnc2N)O)O)(C)C)O)C)O)C)C)O)C	1
O95573	ACSL3_HUMAN	6.2.1.3	1569880463	46208|RHEA: 46209,Metrxn:127779,FACOAL200,rxn37339|rxn37334|rxn37329|rxn37325|rxn37323,MNXR128464,HMR_2966|HMR_0283	6.2.1A2(rev)	Eicosanoyl-CoA	1467885719	C02041	CCCCCCCCCCCCCCCCCCCC(=O)SCCNC(=O)CCNC(=O)C(C(COP(=O)(OP(=O)(OCC1OC(C(C1OP(=O)(O)O)O)n1cnc2c1ncnc2N)O)O)(C)C)O	trans-Dec-2-enoyl-CoA	1467908174	C05275			FDB022536|	CCCCCCCC=CC(=O)SCCNC(=O)CCNC(=O)C(C(COP(=O)(OP(=O)(OCC1OC(C(C1OP(=O)(O)O)O)n1cnc2c1ncnc2N)O)O)(C)C)O	1
O95573	ACSL3_HUMAN	6.2.1.3	1569818701	33615|RHEA: 33616,Metrxn:127777,OCDCAFATPc|FACOAL180,rxn37341|rxn37338|rxn37333|rxn37328|rxn09449|rxn08454,MNXR102141|MNXR99164,RXN-16380,HMR_2957|HMR_0249	6.2.1A2(rev)	Stearoyl-CoA	1467870680	C00412	CCCCCCCCCCCCCCCCCC(=O)SCCNC(=O)CCNC(=O)C(C(COP(=O)(OP(=O)(OCC1OC(C(C1OP(=O)(O)O)O)n1cnc2c1ncnc2N)O)O)(C)C)O	(24E)-3alpha,7alpha,12alpha-Trihydroxy-5beta-cholest-24-enoyl-CoA	1467909692	C05460			FDB024136|	OC1CCC2(C(C1)CC(C1C2CC(O)C2(C1CCC2C(CCC=C(C(=O)SCCNC(=O)CCNC(=O)C(C(COP(=O)(OP(=O)(OCC1OC(C(C1OP(=O)(O)O)O)n1cnc2c1ncnc2N)O)O)(C)C)O)C)C)C)O)C	1
O95573	ACSL3_HUMAN	6.2.1.3	1569880463	46208|RHEA: 46209,Metrxn:127779,FACOAL200,rxn37339|rxn37334|rxn37329|rxn37325|rxn37323,MNXR128464,HMR_2966|HMR_0283	6.2.1A2(rev)	Eicosanoyl-CoA	1467885719	C02041	CCCCCCCCCCCCCCCCCCCC(=O)SCCNC(=O)CCNC(=O)C(C(COP(=O)(OP(=O)(OCC1OC(C(C1OP(=O)(O)O)O)n1cnc2c1ncnc2N)O)O)(C)C)O	trans,cis-Lauro-2,6-dienoyl-CoA	1467908207	C05279				CCCCCC=CCCC=CC(=O)SCCNC(=O)CCNC(=O)C(C(COP(=O)(OP(=O)(OCC1OC(C(C1OP(=O)(O)O)O)n1cnc2c1ncnc2N)O)O)(C)C)O	1
O95573	ACSL3_HUMAN	6.2.1.3	1569818701	33615|RHEA: 33616,Metrxn:127777,OCDCAFATPc|FACOAL180,rxn37341|rxn37338|rxn37333|rxn37328|rxn09449|rxn08454,MNXR102141|MNXR99164,RXN-16380,HMR_2957|HMR_0249	6.2.1A2(rev)	Stearoyl-CoA	1467870680	C00412	CCCCCCCCCCCCCCCCCC(=O)SCCNC(=O)CCNC(=O)C(C(COP(=O)(OP(=O)(OCC1OC(C(C1OP(=O)(O)O)O)n1cnc2c1ncnc2N)O)O)(C)C)O	3alpha,7alpha,12alpha-Trihydroxy-5beta-24-oxocholestanoyl-CoA	1467909761	C05467			FDB024138|	OC1CCC2(C(C1)CC(C1C2CC(O)C2(C1CCC2C(CCC(=O)C(C(=O)SCCNC(=O)CCNC(=O)C(C(COP(=O)(OP(=O)(OCC1OC(C(C1OP(=O)(O)O)O)n1cnc2c1ncnc2N)O)O)(C)C)O)C)C)C)O)C	1
O95573	ACSL3_HUMAN	6.2.1.3	1569880463	46208|RHEA: 46209,Metrxn:127779,FACOAL200,rxn37339|rxn37334|rxn37329|rxn37325|rxn37323,MNXR128464,HMR_2966|HMR_0283	6.2.1A2(rev)	Eicosanoyl-CoA	1467885719	C02041	CCCCCCCCCCCCCCCCCCCC(=O)SCCNC(=O)CCNC(=O)C(C(COP(=O)(OP(=O)(OCC1OC(C(C1OP(=O)(O)O)O)n1cnc2c1ncnc2N)O)O)(C)C)O	cis,cis-3,6-Dodecadienoyl-CoA	1467908217	C05280			FDB023271|	CCCCCC=CCC=CCC(=O)SCCNC(=O)CCNC(=O)C(C(COP(=O)(OP(=O)(OCC1OC(C(C1OP(=O)(O)O)O)n1cnc2c1ncnc2N)O)O)(C)C)O	1
O95573	ACSL3_HUMAN	6.2.1.3	1569818701	33615|RHEA: 33616,Metrxn:127777,OCDCAFATPc|FACOAL180,rxn37341|rxn37338|rxn37333|rxn37328|rxn09449|rxn08454,MNXR102141|MNXR99164,RXN-16380,HMR_2957|HMR_0249	6.2.1A2(rev)	Stearoyl-CoA	1467870680	C00412	CCCCCCCCCCCCCCCCCC(=O)SCCNC(=O)CCNC(=O)C(C(COP(=O)(OP(=O)(OCC1OC(C(C1OP(=O)(O)O)O)n1cnc2c1ncnc2N)O)O)(C)C)O	3-Hydroxypropionyl-CoA	1467911300	C05668			FDB024093|	OCCC(=O)SCCNC(=O)CCNC(=O)C(C(COP(=O)(OP(=O)(OCC1OC(C(C1OP(=O)(O)O)O)n1cnc2c1ncnc2N)O)O)(C)C)O	1
O95573	ACSL3_HUMAN	6.2.1.3	1569880463	46208|RHEA: 46209,Metrxn:127779,FACOAL200,rxn37339|rxn37334|rxn37329|rxn37325|rxn37323,MNXR128464,HMR_2966|HMR_0283	6.2.1A2(rev)	Eicosanoyl-CoA	1467885719	C02041	CCCCCCCCCCCCCCCCCCCC(=O)SCCNC(=O)CCNC(=O)C(C(COP(=O)(OP(=O)(OCC1OC(C(C1OP(=O)(O)O)O)n1cnc2c1ncnc2N)O)O)(C)C)O	Chenodeoxycholoyl-CoA	1467908690	C05337,C17689			FDB023880|	OC1CCC2(C(C1)CC(C1C2CCC2(C1CCC2C(CCC(=O)SCCNC(=O)CCNC(=O)C(C(COP(=O)(OP(=O)(OCC1OC(C(C1OP(=O)(O)O)O)n1cnc2c1ncnc2N)O)O)(C)C)O)C)C)O)C	1
O95573	ACSL3_HUMAN	6.2.1.3	1569818701	33615|RHEA: 33616,Metrxn:127777,OCDCAFATPc|FACOAL180,rxn37341|rxn37338|rxn37333|rxn37328|rxn09449|rxn08454,MNXR102141|MNXR99164,RXN-16380,HMR_2957|HMR_0249	6.2.1A2(rev)	Stearoyl-CoA	1467870680	C00412	CCCCCCCCCCCCCCCCCC(=O)SCCNC(=O)CCNC(=O)C(C(COP(=O)(OP(=O)(OCC1OC(C(C1OP(=O)(O)O)O)n1cnc2c1ncnc2N)O)O)(C)C)O	3-Oxopropionyl-CoA	1467913988	C05989			FDB022882|	O=CCC(=O)SCCNC(=O)CCNC(=O)C(C(COP(=O)(OP(=O)(OCC1OC(C(C1OP(=O)(O)O)O)n1cnc2c1ncnc2N)O)O)(C)C)O	1
O95573	ACSL3_HUMAN	6.2.1.3	1569880463	46208|RHEA: 46209,Metrxn:127779,FACOAL200,rxn37339|rxn37334|rxn37329|rxn37325|rxn37323,MNXR128464,HMR_2966|HMR_0283	6.2.1A2(rev)	Eicosanoyl-CoA	1467885719	C02041	CCCCCCCCCCCCCCCCCCCC(=O)SCCNC(=O)CCNC(=O)C(C(COP(=O)(OP(=O)(OCC1OC(C(C1OP(=O)(O)O)O)n1cnc2c1ncnc2N)O)O)(C)C)O	4-Hydroxyphenylacetyl-CoA	1467908701	C05338			FDB023275|	O=C(NCCSC(=O)Cc1ccc(cc1)O)CCNC(=O)C(C(COP(=O)(OP(=O)(OCC1OC(C(C1OP(=O)(O)O)O)n1cnc2c1ncnc2N)O)O)(C)C)O	1
O95573	ACSL3_HUMAN	6.2.1.3	1569818701	33615|RHEA: 33616,Metrxn:127777,OCDCAFATPc|FACOAL180,rxn37341|rxn37338|rxn37333|rxn37328|rxn09449|rxn08454,MNXR102141|MNXR99164,RXN-16380,HMR_2957|HMR_0249	6.2.1A2(rev)	Stearoyl-CoA	1467870680	C00412	CCCCCCCCCCCCCCCCCC(=O)SCCNC(=O)CCNC(=O)C(C(COP(=O)(OP(=O)(OCC1OC(C(C1OP(=O)(O)O)O)n1cnc2c1ncnc2N)O)O)(C)C)O	3-Hydroxyisovaleryl-CoA	1467914056	C05998			FDB024126|	O=C(NCCSC(=O)CC(O)(C)C)CCNC(=O)C(C(COP(=O)(OP(=O)(OCC1OC(C(C1OP(=O)(O)O)O)n1cnc2c1ncnc2N)O)O)(C)C)O	1
O95573	ACSL3_HUMAN	6.2.1.3	1569880463	46208|RHEA: 46209,Metrxn:127779,FACOAL200,rxn37339|rxn37334|rxn37329|rxn37325|rxn37323,MNXR128464,HMR_2966|HMR_0283	6.2.1A2(rev)	Eicosanoyl-CoA	1467885719	C02041	CCCCCCCCCCCCCCCCCCCC(=O)SCCNC(=O)CCNC(=O)C(C(COP(=O)(OP(=O)(OCC1OC(C(C1OP(=O)(O)O)O)n1cnc2c1ncnc2N)O)O)(C)C)O	(24E)-3alpha,7alpha-Dihydroxy-5beta-cholest-24-enoyl-CoA	1467909570	C05447			FDB024142|	OC1CCC2(C(C1)CC(C1C2CCC2(C1CCC2C(CCC=C(C(=O)SCCNC(=O)CCNC(=O)C(C(COP(=O)(OP(=O)(OCC1OC(C(C1OP(=O)(O)O)O)n1cnc2c1ncnc2N)O)O)(C)C)O)C)C)C)O)C	1
O95573	ACSL3_HUMAN	6.2.1.3	1569818701	33615|RHEA: 33616,Metrxn:127777,OCDCAFATPc|FACOAL180,rxn37341|rxn37338|rxn37333|rxn37328|rxn09449|rxn08454,MNXR102141|MNXR99164,RXN-16380,HMR_2957|HMR_0249	6.2.1A2(rev)	Stearoyl-CoA	1467870680	C00412	CCCCCCCCCCCCCCCCCC(=O)SCCNC(=O)CCNC(=O)C(C(COP(=O)(OP(=O)(OCC1OC(C(C1OP(=O)(O)O)O)n1cnc2c1ncnc2N)O)O)(C)C)O	L-erythro-3-Methylmalyl-CoA	1467914287	C06027				O=C(NCCSC(=O)C(C(C(=O)O)O)C)CCNC(=O)C(C(COP(=O)(OP(=O)(OCC1OC(C(C1OP(=O)(O)O)O)n1cnc2c1ncnc2N)O)O)(C)C)O	1
O95573	ACSL3_HUMAN	6.2.1.3	1569880463	46208|RHEA: 46209,Metrxn:127779,FACOAL200,rxn37339|rxn37334|rxn37329|rxn37325|rxn37323,MNXR128464,HMR_2966|HMR_0283	6.2.1A2(rev)	Eicosanoyl-CoA	1467885719	C02041	CCCCCCCCCCCCCCCCCCCC(=O)SCCNC(=O)CCNC(=O)C(C(COP(=O)(OP(=O)(OCC1OC(C(C1OP(=O)(O)O)O)n1cnc2c1ncnc2N)O)O)(C)C)O	(24R,25R)-3alpha,7alpha,24-Trihydroxy-5beta-cholestanoyl-CoA	1467909581	C05448			FDB029072|	OC1CCC2(C(C1)CC(C1C2CCC2(C1CCC2C(CCC(C(C(=O)SCCNC(=O)CCNC(=O)C(C(COP(=O)(OP(=O)(OCC1OC(C(C1OP(=O)(O)O)O)n1cnc2c1ncnc2N)O)O)(C)C)O)C)O)C)C)O)C	1
O95573	ACSL3_HUMAN	6.2.1.3	1569818701	33615|RHEA: 33616,Metrxn:127777,OCDCAFATPc|FACOAL180,rxn37341|rxn37338|rxn37333|rxn37328|rxn09449|rxn08454,MNXR102141|MNXR99164,RXN-16380,HMR_2957|HMR_0249	6.2.1A2(rev)	Stearoyl-CoA	1467870680	C00412	CCCCCCCCCCCCCCCCCC(=O)SCCNC(=O)CCNC(=O)C(C(COP(=O)(OP(=O)(OCC1OC(C(C1OP(=O)(O)O)O)n1cnc2c1ncnc2N)O)O)(C)C)O	2-Methylfumaryl-CoA	1467914300	C06028				O=C(NCCSC(=O)C(=CC(=O)O)C)CCNC(=O)C(C(COP(=O)(OP(=O)(OCC1OC(C(C1OP(=O)(O)O)O)n1cnc2c1ncnc2N)O)O)(C)C)O	1
O95573	ACSL3_HUMAN	6.2.1.3	1569880463	46208|RHEA: 46209,Metrxn:127779,FACOAL200,rxn37339|rxn37334|rxn37329|rxn37325|rxn37323,MNXR128464,HMR_2966|HMR_0283	6.2.1A2(rev)	Eicosanoyl-CoA	1467885719	C02041	CCCCCCCCCCCCCCCCCCCC(=O)SCCNC(=O)CCNC(=O)C(C(COP(=O)(OP(=O)(OCC1OC(C(C1OP(=O)(O)O)O)n1cnc2c1ncnc2N)O)O)(C)C)O	3alpha,7alpha-Dihydroxy-5beta-24-oxocholestanoyl-CoA	1467909591	C05449			FDB024143|	OC1CCC2(C(C1)CC(C1C2CCC2(C1CCC2C(CCC(=O)C(C(=O)SCCNC(=O)CCNC(=O)C(C(COP(=O)(OP(=O)(OCC1OC(C(C1OP(=O)(O)O)O)n1cnc2c1ncnc2N)O)O)(C)C)O)C)C)C)O)C	1
O95573	ACSL3_HUMAN	6.2.1.3	1569818701	33615|RHEA: 33616,Metrxn:127777,OCDCAFATPc|FACOAL180,rxn37341|rxn37338|rxn37333|rxn37328|rxn09449|rxn08454,MNXR102141|MNXR99164,RXN-16380,HMR_2957|HMR_0249	6.2.1A2(rev)	Stearoyl-CoA	1467870680	C00412	CCCCCCCCCCCCCCCCCC(=O)SCCNC(=O)CCNC(=O)C(C(COP(=O)(OP(=O)(OCC1OC(C(C1OP(=O)(O)O)O)n1cnc2c1ncnc2N)O)O)(C)C)O	Cyclohexa-1,5-diene-1-carbonyl-CoA	1467916648	C06322			FDB028852|	O=C(NCCSC(=O)C1=CCCC=C1)CCNC(=O)C(C(COP(=O)(OP(=O)(OCC1OC(C(C1OP(=O)(O)O)O)n1cnc2c1ncnc2N)O)O)(C)C)O	1
O95573	ACSL3_HUMAN	6.2.1.3	1569880463	46208|RHEA: 46209,Metrxn:127779,FACOAL200,rxn37339|rxn37334|rxn37329|rxn37325|rxn37323,MNXR128464,HMR_2966|HMR_0283	6.2.1A2(rev)	Eicosanoyl-CoA	1467885719	C02041	CCCCCCCCCCCCCCCCCCCC(=O)SCCNC(=O)CCNC(=O)C(C(COP(=O)(OP(=O)(OCC1OC(C(C1OP(=O)(O)O)O)n1cnc2c1ncnc2N)O)O)(C)C)O	3alpha,7alpha,12alpha,24-Tetrahydroxy-5beta-cholestanoyl-CoA	1467909602	C05450,C15614			FDB024137|	OC1CCC2(C(C1)CC(C1C2CC(O)C2(C1CCC2C(CCC(C(C(=O)SCCNC(=O)CCNC(=O)C(C(COP(=O)(OP(=O)(OCC1OC(C(C1OP(=O)(O)O)O)n1cnc2c1ncnc2N)O)O)(C)C)O)C)O)C)C)O)C	1
O95573	ACSL3_HUMAN	6.2.1.3	1569818701	33615|RHEA: 33616,Metrxn:127777,OCDCAFATPc|FACOAL180,rxn37341|rxn37338|rxn37333|rxn37328|rxn09449|rxn08454,MNXR102141|MNXR99164,RXN-16380,HMR_2957|HMR_0249	6.2.1A2(rev)	Stearoyl-CoA	1467870680	C00412	CCCCCCCCCCCCCCCCCC(=O)SCCNC(=O)CCNC(=O)C(C(COP(=O)(OP(=O)(OCC1OC(C(C1OP(=O)(O)O)O)n1cnc2c1ncnc2N)O)O)(C)C)O	4-Chlorobenzoyl-CoA	1467917321	C06387				O=C(NCCSC(=O)c1ccc(cc1)Cl)CCNC(=O)C(C(COP(=O)(OP(=O)(OCC1OC(C(C1OP(=O)(O)O)O)n1cnc2c1ncnc2N)O)O)(C)C)O	1
O95573	ACSL3_HUMAN	6.2.1.3	1569880463	46208|RHEA: 46209,Metrxn:127779,FACOAL200,rxn37339|rxn37334|rxn37329|rxn37325|rxn37323,MNXR128464,HMR_2966|HMR_0283	6.2.1A2(rev)	Eicosanoyl-CoA	1467885719	C02041	CCCCCCCCCCCCCCCCCCCC(=O)SCCNC(=O)CCNC(=O)C(C(COP(=O)(OP(=O)(OCC1OC(C(C1OP(=O)(O)O)O)n1cnc2c1ncnc2N)O)O)(C)C)O	(24E)-3alpha,7alpha,12alpha-Trihydroxy-5beta-cholest-24-enoyl-CoA	1467909692	C05460			FDB024136|	OC1CCC2(C(C1)CC(C1C2CC(O)C2(C1CCC2C(CCC=C(C(=O)SCCNC(=O)CCNC(=O)C(C(COP(=O)(OP(=O)(OCC1OC(C(C1OP(=O)(O)O)O)n1cnc2c1ncnc2N)O)O)(C)C)O)C)C)C)O)C	1
O95573	ACSL3_HUMAN	6.2.1.3	1569818701	33615|RHEA: 33616,Metrxn:127777,OCDCAFATPc|FACOAL180,rxn37341|rxn37338|rxn37333|rxn37328|rxn09449|rxn08454,MNXR102141|MNXR99164,RXN-16380,HMR_2957|HMR_0249	6.2.1A2(rev)	Stearoyl-CoA	1467870680	C00412	CCCCCCCCCCCCCCCCCC(=O)SCCNC(=O)CCNC(=O)C(C(COP(=O)(OP(=O)(OCC1OC(C(C1OP(=O)(O)O)O)n1cnc2c1ncnc2N)O)O)(C)C)O	Malonamoyl-CoA	1467919717	C06625		ChEMBLE_NTD		O=C(NCCSC(=O)CC(=O)N)CCNC(=O)C(C(COP(=O)(OP(=O)(OCC1OC(C(C1OP(=O)(O)O)O)n1cnc2c1ncnc2N)O)O)(C)C)O	1
O95573	ACSL3_HUMAN	6.2.1.3	1569880463	46208|RHEA: 46209,Metrxn:127779,FACOAL200,rxn37339|rxn37334|rxn37329|rxn37325|rxn37323,MNXR128464,HMR_2966|HMR_0283	6.2.1A2(rev)	Eicosanoyl-CoA	1467885719	C02041	CCCCCCCCCCCCCCCCCCCC(=O)SCCNC(=O)CCNC(=O)C(C(COP(=O)(OP(=O)(OCC1OC(C(C1OP(=O)(O)O)O)n1cnc2c1ncnc2N)O)O)(C)C)O	3alpha,7alpha,12alpha-Trihydroxy-5beta-24-oxocholestanoyl-CoA	1467909761	C05467			FDB024138|	OC1CCC2(C(C1)CC(C1C2CC(O)C2(C1CCC2C(CCC(=O)C(C(=O)SCCNC(=O)CCNC(=O)C(C(COP(=O)(OP(=O)(OCC1OC(C(C1OP(=O)(O)O)O)n1cnc2c1ncnc2N)O)O)(C)C)O)C)C)C)O)C	1
O95573	ACSL3_HUMAN	6.2.1.3	1569818701	33615|RHEA: 33616,Metrxn:127777,OCDCAFATPc|FACOAL180,rxn37341|rxn37338|rxn37333|rxn37328|rxn09449|rxn08454,MNXR102141|MNXR99164,RXN-16380,HMR_2957|HMR_0249	6.2.1A2(rev)	Stearoyl-CoA	1467870680	C00412	CCCCCCCCCCCCCCCCCC(=O)SCCNC(=O)CCNC(=O)C(C(COP(=O)(OP(=O)(OCC1OC(C(C1OP(=O)(O)O)O)n1cnc2c1ncnc2N)O)O)(C)C)O	2,4-Dichlorobenzoyl-CoA	1467920185	C06671				O=C(NCCSC(=O)c1ccc(cc1Cl)Cl)CCNC(=O)C(C(COP(=O)(OP(=O)(OCC1OC(C(C1OP(=O)(O)O)O)n1cnc2c1ncnc2N)O)O)(C)C)O	1
O95573	ACSL3_HUMAN	6.2.1.3	1569880463	46208|RHEA: 46209,Metrxn:127779,FACOAL200,rxn37339|rxn37334|rxn37329|rxn37325|rxn37323,MNXR128464,HMR_2966|HMR_0283	6.2.1A2(rev)	Eicosanoyl-CoA	1467885719	C02041	CCCCCCCCCCCCCCCCCCCC(=O)SCCNC(=O)CCNC(=O)C(C(COP(=O)(OP(=O)(OCC1OC(C(C1OP(=O)(O)O)O)n1cnc2c1ncnc2N)O)O)(C)C)O	3-Hydroxypropionyl-CoA	1467911300	C05668			FDB024093|	OCCC(=O)SCCNC(=O)CCNC(=O)C(C(COP(=O)(OP(=O)(OCC1OC(C(C1OP(=O)(O)O)O)n1cnc2c1ncnc2N)O)O)(C)C)O	1
O95573	ACSL3_HUMAN	6.2.1.3	1569880463	46208|RHEA: 46209,Metrxn:127779,FACOAL200,rxn37339|rxn37334|rxn37329|rxn37325|rxn37323,MNXR128464,HMR_2966|HMR_0283	6.2.1A2(rev)	Eicosanoyl-CoA	1467885719	C02041	CCCCCCCCCCCCCCCCCCCC(=O)SCCNC(=O)CCNC(=O)C(C(COP(=O)(OP(=O)(OCC1OC(C(C1OP(=O)(O)O)O)n1cnc2c1ncnc2N)O)O)(C)C)O	3-Oxopropionyl-CoA	1467913988	C05989			FDB022882|	O=CCC(=O)SCCNC(=O)CCNC(=O)C(C(COP(=O)(OP(=O)(OCC1OC(C(C1OP(=O)(O)O)O)n1cnc2c1ncnc2N)O)O)(C)C)O	1
O95573	ACSL3_HUMAN	6.2.1.3	1569818701	33615|RHEA: 33616,Metrxn:127777,OCDCAFATPc|FACOAL180,rxn37341|rxn37338|rxn37333|rxn37328|rxn09449|rxn08454,MNXR102141|MNXR99164,RXN-16380,HMR_2957|HMR_0249	6.2.1A2(rev)	Stearoyl-CoA	1467870680	C00412	CCCCCCCCCCCCCCCCCC(=O)SCCNC(=O)CCNC(=O)C(C(COP(=O)(OP(=O)(OCC1OC(C(C1OP(=O)(O)O)O)n1cnc2c1ncnc2N)O)O)(C)C)O	3-Hydroxypimeloyl-CoA	1467920583	C06714			FDB028812|	OC(CC(=O)SCCNC(=O)CCNC(=O)C(C(COP(=O)(OP(=O)(OCC1OC(C(C1OP(=O)(O)O)O)n1cnc2c1ncnc2N)O)O)(C)C)O)CCCC(=O)O	1
O95573	ACSL3_HUMAN	6.2.1.3	1569880463	46208|RHEA: 46209,Metrxn:127779,FACOAL200,rxn37339|rxn37334|rxn37329|rxn37325|rxn37323,MNXR128464,HMR_2966|HMR_0283	6.2.1A2(rev)	Eicosanoyl-CoA	1467885719	C02041	CCCCCCCCCCCCCCCCCCCC(=O)SCCNC(=O)CCNC(=O)C(C(COP(=O)(OP(=O)(OCC1OC(C(C1OP(=O)(O)O)O)n1cnc2c1ncnc2N)O)O)(C)C)O	3-Hydroxyisovaleryl-CoA	1467914056	C05998			FDB024126|	O=C(NCCSC(=O)CC(O)(C)C)CCNC(=O)C(C(COP(=O)(OP(=O)(OCC1OC(C(C1OP(=O)(O)O)O)n1cnc2c1ncnc2N)O)O)(C)C)O	1
O95573	ACSL3_HUMAN	6.2.1.3	1569818701	33615|RHEA: 33616,Metrxn:127777,OCDCAFATPc|FACOAL180,rxn37341|rxn37338|rxn37333|rxn37328|rxn09449|rxn08454,MNXR102141|MNXR99164,RXN-16380,HMR_2957|HMR_0249	6.2.1A2(rev)	Stearoyl-CoA	1467870680	C00412	CCCCCCCCCCCCCCCCCC(=O)SCCNC(=O)CCNC(=O)C(C(COP(=O)(OP(=O)(OCC1OC(C(C1OP(=O)(O)O)O)n1cnc2c1ncnc2N)O)O)(C)C)O	3-Oxopimeloyl-CoA	1467920593	C06715			FDB028814|	O=C(NCCSC(=O)CC(=O)CCCC(=O)O)CCNC(=O)C(C(COP(=O)(OP(=O)(OCC1OC(C(C1OP(=O)(O)O)O)n1cnc2c1ncnc2N)O)O)(C)C)O	1
O95573	ACSL3_HUMAN	6.2.1.3	1569880463	46208|RHEA: 46209,Metrxn:127779,FACOAL200,rxn37339|rxn37334|rxn37329|rxn37325|rxn37323,MNXR128464,HMR_2966|HMR_0283	6.2.1A2(rev)	Eicosanoyl-CoA	1467885719	C02041	CCCCCCCCCCCCCCCCCCCC(=O)SCCNC(=O)CCNC(=O)C(C(COP(=O)(OP(=O)(OCC1OC(C(C1OP(=O)(O)O)O)n1cnc2c1ncnc2N)O)O)(C)C)O	L-erythro-3-Methylmalyl-CoA	1467914287	C06027				O=C(NCCSC(=O)C(C(C(=O)O)O)C)CCNC(=O)C(C(COP(=O)(OP(=O)(OCC1OC(C(C1OP(=O)(O)O)O)n1cnc2c1ncnc2N)O)O)(C)C)O	1
O95573	ACSL3_HUMAN	6.2.1.3	1569818701	33615|RHEA: 33616,Metrxn:127777,OCDCAFATPc|FACOAL180,rxn37341|rxn37338|rxn37333|rxn37328|rxn09449|rxn08454,MNXR102141|MNXR99164,RXN-16380,HMR_2957|HMR_0249	6.2.1A2(rev)	Stearoyl-CoA	1467870680	C00412	CCCCCCCCCCCCCCCCCC(=O)SCCNC(=O)CCNC(=O)C(C(COP(=O)(OP(=O)(OCC1OC(C(C1OP(=O)(O)O)O)n1cnc2c1ncnc2N)O)O)(C)C)O	6-Carboxyhex-2-enoyl-CoA	1467920661	C06723				O=C(NCCSC(=O)C=CCCCC(=O)O)CCNC(=O)C(C(COP(=O)(OP(=O)(OCC1OC(C(C1OP(=O)(O)O)O)n1cnc2c1ncnc2N)O)O)(C)C)O	1
O95573	ACSL3_HUMAN	6.2.1.3	1569880463	46208|RHEA: 46209,Metrxn:127779,FACOAL200,rxn37339|rxn37334|rxn37329|rxn37325|rxn37323,MNXR128464,HMR_2966|HMR_0283	6.2.1A2(rev)	Eicosanoyl-CoA	1467885719	C02041	CCCCCCCCCCCCCCCCCCCC(=O)SCCNC(=O)CCNC(=O)C(C(COP(=O)(OP(=O)(OCC1OC(C(C1OP(=O)(O)O)O)n1cnc2c1ncnc2N)O)O)(C)C)O	2-Methylfumaryl-CoA	1467914300	C06028				O=C(NCCSC(=O)C(=CC(=O)O)C)CCNC(=O)C(C(COP(=O)(OP(=O)(OCC1OC(C(C1OP(=O)(O)O)O)n1cnc2c1ncnc2N)O)O)(C)C)O	1
O95573	ACSL3_HUMAN	6.2.1.3	1569880463	46208|RHEA: 46209,Metrxn:127779,FACOAL200,rxn37339|rxn37334|rxn37329|rxn37325|rxn37323,MNXR128464,HMR_2966|HMR_0283	6.2.1A2(rev)	Eicosanoyl-CoA	1467885719	C02041	CCCCCCCCCCCCCCCCCCCC(=O)SCCNC(=O)CCNC(=O)C(C(COP(=O)(OP(=O)(OCC1OC(C(C1OP(=O)(O)O)O)n1cnc2c1ncnc2N)O)O)(C)C)O	Cyclohexa-1,5-diene-1-carbonyl-CoA	1467916648	C06322			FDB028852|	O=C(NCCSC(=O)C1=CCCC=C1)CCNC(=O)C(C(COP(=O)(OP(=O)(OCC1OC(C(C1OP(=O)(O)O)O)n1cnc2c1ncnc2N)O)O)(C)C)O	1
O95573	ACSL3_HUMAN	6.2.1.3	1569818701	33615|RHEA: 33616,Metrxn:127777,OCDCAFATPc|FACOAL180,rxn37341|rxn37338|rxn37333|rxn37328|rxn09449|rxn08454,MNXR102141|MNXR99164,RXN-16380,HMR_2957|HMR_0249	6.2.1A2(rev)	Stearoyl-CoA	1467870680	C00412	CCCCCCCCCCCCCCCCCC(=O)SCCNC(=O)CCNC(=O)C(C(COP(=O)(OP(=O)(OCC1OC(C(C1OP(=O)(O)O)O)n1cnc2c1ncnc2N)O)O)(C)C)O	(E)-11-Tetradecenoyl-CoA	1467920793	C06736,C06737				CCC=CCCCCCCCCCC(=O)SCCNC(=O)CCNC(=O)C(C(COP(=O)(OP(=O)(OCC1OC(C(C1OP(=O)(O)O)O)n1cnc2c1ncnc2N)O)O)(C)C)O	1
O95573	ACSL3_HUMAN	6.2.1.3	1569880463	46208|RHEA: 46209,Metrxn:127779,FACOAL200,rxn37339|rxn37334|rxn37329|rxn37325|rxn37323,MNXR128464,HMR_2966|HMR_0283	6.2.1A2(rev)	Eicosanoyl-CoA	1467885719	C02041	CCCCCCCCCCCCCCCCCCCC(=O)SCCNC(=O)CCNC(=O)C(C(COP(=O)(OP(=O)(OCC1OC(C(C1OP(=O)(O)O)O)n1cnc2c1ncnc2N)O)O)(C)C)O	4-Chlorobenzoyl-CoA	1467917321	C06387				O=C(NCCSC(=O)c1ccc(cc1)Cl)CCNC(=O)C(C(COP(=O)(OP(=O)(OCC1OC(C(C1OP(=O)(O)O)O)n1cnc2c1ncnc2N)O)O)(C)C)O	1
O95573	ACSL3_HUMAN	6.2.1.3	1569818701	33615|RHEA: 33616,Metrxn:127777,OCDCAFATPc|FACOAL180,rxn37341|rxn37338|rxn37333|rxn37328|rxn09449|rxn08454,MNXR102141|MNXR99164,RXN-16380,HMR_2957|HMR_0249	6.2.1A2(rev)	Stearoyl-CoA	1467870680	C00412	CCCCCCCCCCCCCCCCCC(=O)SCCNC(=O)CCNC(=O)C(C(COP(=O)(OP(=O)(OCC1OC(C(C1OP(=O)(O)O)O)n1cnc2c1ncnc2N)O)O)(C)C)O	6-Hydroxycyclohex-1-ene-1-carbonyl-CoA	1467920916	C06749			FDB028833|	O=C(NCCSC(=O)C1=CCCCC1O)CCNC(=O)C(C(COP(=O)(OP(=O)(OCC1OC(C(C1OP(=O)(O)O)O)n1cnc2c1ncnc2N)O)O)(C)C)O	1
O95573	ACSL3_HUMAN	6.2.1.3	1569880463	46208|RHEA: 46209,Metrxn:127779,FACOAL200,rxn37339|rxn37334|rxn37329|rxn37325|rxn37323,MNXR128464,HMR_2966|HMR_0283	6.2.1A2(rev)	Eicosanoyl-CoA	1467885719	C02041	CCCCCCCCCCCCCCCCCCCC(=O)SCCNC(=O)CCNC(=O)C(C(COP(=O)(OP(=O)(OCC1OC(C(C1OP(=O)(O)O)O)n1cnc2c1ncnc2N)O)O)(C)C)O	Malonamoyl-CoA	1467919717	C06625		ChEMBLE_NTD		O=C(NCCSC(=O)CC(=O)N)CCNC(=O)C(C(COP(=O)(OP(=O)(OCC1OC(C(C1OP(=O)(O)O)O)n1cnc2c1ncnc2N)O)O)(C)C)O	1
O95573	ACSL3_HUMAN	6.2.1.3	1569818701	33615|RHEA: 33616,Metrxn:127777,OCDCAFATPc|FACOAL180,rxn37341|rxn37338|rxn37333|rxn37328|rxn09449|rxn08454,MNXR102141|MNXR99164,RXN-16380,HMR_2957|HMR_0249	6.2.1A2(rev)	Stearoyl-CoA	1467870680	C00412	CCCCCCCCCCCCCCCCCC(=O)SCCNC(=O)CCNC(=O)C(C(COP(=O)(OP(=O)(OCC1OC(C(C1OP(=O)(O)O)O)n1cnc2c1ncnc2N)O)O)(C)C)O	Benzoylacetyl-CoA	1467923954	C07118				O=C(NCCSC(=O)CC(=O)c1ccccc1)CCNC(=O)C(C(COP(=O)(OP(=O)(OCC1OC(C(C1OP(=O)(O)O)O)n1cnc2c1ncnc2N)O)O)(C)C)O	1
O95573	ACSL3_HUMAN	6.2.1.3	1569880463	46208|RHEA: 46209,Metrxn:127779,FACOAL200,rxn37339|rxn37334|rxn37329|rxn37325|rxn37323,MNXR128464,HMR_2966|HMR_0283	6.2.1A2(rev)	Eicosanoyl-CoA	1467885719	C02041	CCCCCCCCCCCCCCCCCCCC(=O)SCCNC(=O)CCNC(=O)C(C(COP(=O)(OP(=O)(OCC1OC(C(C1OP(=O)(O)O)O)n1cnc2c1ncnc2N)O)O)(C)C)O	2,4-Dichlorobenzoyl-CoA	1467920185	C06671				O=C(NCCSC(=O)c1ccc(cc1Cl)Cl)CCNC(=O)C(C(COP(=O)(OP(=O)(OCC1OC(C(C1OP(=O)(O)O)O)n1cnc2c1ncnc2N)O)O)(C)C)O	1
O95573	ACSL3_HUMAN	6.2.1.3	1569880463	46208|RHEA: 46209,Metrxn:127779,FACOAL200,rxn37339|rxn37334|rxn37329|rxn37325|rxn37323,MNXR128464,HMR_2966|HMR_0283	6.2.1A2(rev)	Eicosanoyl-CoA	1467885719	C02041	CCCCCCCCCCCCCCCCCCCC(=O)SCCNC(=O)CCNC(=O)C(C(COP(=O)(OP(=O)(OCC1OC(C(C1OP(=O)(O)O)O)n1cnc2c1ncnc2N)O)O)(C)C)O	3-Hydroxypimeloyl-CoA	1467920583	C06714			FDB028812|	OC(CC(=O)SCCNC(=O)CCNC(=O)C(C(COP(=O)(OP(=O)(OCC1OC(C(C1OP(=O)(O)O)O)n1cnc2c1ncnc2N)O)O)(C)C)O)CCCC(=O)O	1
O95573	ACSL3_HUMAN	6.2.1.3	1569818701	33615|RHEA: 33616,Metrxn:127777,OCDCAFATPc|FACOAL180,rxn37341|rxn37338|rxn37333|rxn37328|rxn09449|rxn08454,MNXR102141|MNXR99164,RXN-16380,HMR_2957|HMR_0249	6.2.1A2(rev)	Stearoyl-CoA	1467870680	C00412	CCCCCCCCCCCCCCCCCC(=O)SCCNC(=O)CCNC(=O)C(C(COP(=O)(OP(=O)(OCC1OC(C(C1OP(=O)(O)O)O)n1cnc2c1ncnc2N)O)O)(C)C)O	[(1R)-2,2,3-Trimethyl-5-oxocyclopent-3-enyl]acetyl-CoA	1467924257	C07160				O=C(NCCSC(=O)CC1C(=O)C=C(C1(C)C)C)CCNC(=O)C(C(COP(=O)(OP(=O)(OCC1OC(C(C1OP(=O)(O)O)O)n1cnc2c1ncnc2N)O)O)(C)C)O	1
O95573	ACSL3_HUMAN	6.2.1.3	1569880463	46208|RHEA: 46209,Metrxn:127779,FACOAL200,rxn37339|rxn37334|rxn37329|rxn37325|rxn37323,MNXR128464,HMR_2966|HMR_0283	6.2.1A2(rev)	Eicosanoyl-CoA	1467885719	C02041	CCCCCCCCCCCCCCCCCCCC(=O)SCCNC(=O)CCNC(=O)C(C(COP(=O)(OP(=O)(OCC1OC(C(C1OP(=O)(O)O)O)n1cnc2c1ncnc2N)O)O)(C)C)O	3-Oxopimeloyl-CoA	1467920593	C06715			FDB028814|	O=C(NCCSC(=O)CC(=O)CCCC(=O)O)CCNC(=O)C(C(COP(=O)(OP(=O)(OCC1OC(C(C1OP(=O)(O)O)O)n1cnc2c1ncnc2N)O)O)(C)C)O	1
O95573	ACSL3_HUMAN	6.2.1.3	1569818701	33615|RHEA: 33616,Metrxn:127777,OCDCAFATPc|FACOAL180,rxn37341|rxn37338|rxn37333|rxn37328|rxn09449|rxn08454,MNXR102141|MNXR99164,RXN-16380,HMR_2957|HMR_0249	6.2.1A2(rev)	Stearoyl-CoA	1467870680	C00412	CCCCCCCCCCCCCCCCCC(=O)SCCNC(=O)CCNC(=O)C(C(COP(=O)(OP(=O)(OCC1OC(C(C1OP(=O)(O)O)O)n1cnc2c1ncnc2N)O)O)(C)C)O	3-Oxopristanoyl-CoA	1467925374	C07297			FDB022821|	CC(CCC(=O)C(C(=O)SCCNC(=O)CCNC(=O)C(C(COP(=O)(OP(=O)(OCC1OC(C(C1OP(=O)(O)O)O)n1cnc2c1ncnc2N)O)O)(C)C)O)C)CCCC(CCCC(C)C)C	1
O95573	ACSL3_HUMAN	6.2.1.3	1569880463	46208|RHEA: 46209,Metrxn:127779,FACOAL200,rxn37339|rxn37334|rxn37329|rxn37325|rxn37323,MNXR128464,HMR_2966|HMR_0283	6.2.1A2(rev)	Eicosanoyl-CoA	1467885719	C02041	CCCCCCCCCCCCCCCCCCCC(=O)SCCNC(=O)CCNC(=O)C(C(COP(=O)(OP(=O)(OCC1OC(C(C1OP(=O)(O)O)O)n1cnc2c1ncnc2N)O)O)(C)C)O	6-Carboxyhex-2-enoyl-CoA	1467920661	C06723				O=C(NCCSC(=O)C=CCCCC(=O)O)CCNC(=O)C(C(COP(=O)(OP(=O)(OCC1OC(C(C1OP(=O)(O)O)O)n1cnc2c1ncnc2N)O)O)(C)C)O	1
O95573	ACSL3_HUMAN	6.2.1.3	1569818701	33615|RHEA: 33616,Metrxn:127777,OCDCAFATPc|FACOAL180,rxn37341|rxn37338|rxn37333|rxn37328|rxn09449|rxn08454,MNXR102141|MNXR99164,RXN-16380,HMR_2957|HMR_0249	6.2.1A2(rev)	Stearoyl-CoA	1467870680	C00412	CCCCCCCCCCCCCCCCCC(=O)SCCNC(=O)CCNC(=O)C(C(COP(=O)(OP(=O)(OCC1OC(C(C1OP(=O)(O)O)O)n1cnc2c1ncnc2N)O)O)(C)C)O	3-Hydroxy-3-(3-hydroxy-4-methoxyphenyl)propionyl-CoA	1467925403	C07302				COc1ccc(cc1O)C(CC(=O)SCCNC(=O)CCNC(=O)C(C(COP(=O)(OP(=O)(OCC1OC(C(C1OP(=O)(O)O)O)n1cnc2c1ncnc2N)O)O)(C)C)O)O	1
O95573	ACSL3_HUMAN	6.2.1.3	1569880463	46208|RHEA: 46209,Metrxn:127779,FACOAL200,rxn37339|rxn37334|rxn37329|rxn37325|rxn37323,MNXR128464,HMR_2966|HMR_0283	6.2.1A2(rev)	Eicosanoyl-CoA	1467885719	C02041	CCCCCCCCCCCCCCCCCCCC(=O)SCCNC(=O)CCNC(=O)C(C(COP(=O)(OP(=O)(OCC1OC(C(C1OP(=O)(O)O)O)n1cnc2c1ncnc2N)O)O)(C)C)O	(E)-11-Tetradecenoyl-CoA	1467920793	C06736,C06737				CCC=CCCCCCCCCCC(=O)SCCNC(=O)CCNC(=O)C(C(COP(=O)(OP(=O)(OCC1OC(C(C1OP(=O)(O)O)O)n1cnc2c1ncnc2N)O)O)(C)C)O	1
O95573	ACSL3_HUMAN	6.2.1.3	1569818701	33615|RHEA: 33616,Metrxn:127777,OCDCAFATPc|FACOAL180,rxn37341|rxn37338|rxn37333|rxn37328|rxn09449|rxn08454,MNXR102141|MNXR99164,RXN-16380,HMR_2957|HMR_0249	6.2.1A2(rev)	Stearoyl-CoA	1467870680	C00412	CCCCCCCCCCCCCCCCCC(=O)SCCNC(=O)CCNC(=O)C(C(COP(=O)(OP(=O)(OCC1OC(C(C1OP(=O)(O)O)O)n1cnc2c1ncnc2N)O)O)(C)C)O	4-Hydroxy-3-methoxyphenyl-beta-hydroxypropanoyl-CoA	1467925412	C07303				COc1cc(ccc1O)C(CC(=O)SCCNC(=O)CCNC(=O)C(C(COP(=O)(OP(=O)(OCC1OC(C(C1OP(=O)(O)O)O)n1cnc2c1ncnc2N)O)O)(C)C)O)O	1
O95573	ACSL3_HUMAN	6.2.1.3	1569880463	46208|RHEA: 46209,Metrxn:127779,FACOAL200,rxn37339|rxn37334|rxn37329|rxn37325|rxn37323,MNXR128464,HMR_2966|HMR_0283	6.2.1A2(rev)	Eicosanoyl-CoA	1467885719	C02041	CCCCCCCCCCCCCCCCCCCC(=O)SCCNC(=O)CCNC(=O)C(C(COP(=O)(OP(=O)(OCC1OC(C(C1OP(=O)(O)O)O)n1cnc2c1ncnc2N)O)O)(C)C)O	6-Hydroxycyclohex-1-ene-1-carbonyl-CoA	1467920916	C06749			FDB028833|	O=C(NCCSC(=O)C1=CCCCC1O)CCNC(=O)C(C(COP(=O)(OP(=O)(OCC1OC(C(C1OP(=O)(O)O)O)n1cnc2c1ncnc2N)O)O)(C)C)O	1
O95573	ACSL3_HUMAN	6.2.1.3	1569818701	33615|RHEA: 33616,Metrxn:127777,OCDCAFATPc|FACOAL180,rxn37341|rxn37338|rxn37333|rxn37328|rxn09449|rxn08454,MNXR102141|MNXR99164,RXN-16380,HMR_2957|HMR_0249	6.2.1A2(rev)	Stearoyl-CoA	1467870680	C00412	CCCCCCCCCCCCCCCCCC(=O)SCCNC(=O)CCNC(=O)C(C(COP(=O)(OP(=O)(OCC1OC(C(C1OP(=O)(O)O)O)n1cnc2c1ncnc2N)O)O)(C)C)O	2-Hydroxyphytanoyl-CoA	1467925823	C07343			FDB022539|	CC(CCCC(CCCC(C)C)C)CCCC(C(C(=O)SCCNC(=O)CCNC(=O)C(C(COP(=O)(OP(=O)(OCC1OC(C(C1OP(=O)(O)O)O)n1cnc2c1ncnc2N)O)O)(C)C)O)O)C	1
O95573	ACSL3_HUMAN	6.2.1.3	1569880463	46208|RHEA: 46209,Metrxn:127779,FACOAL200,rxn37339|rxn37334|rxn37329|rxn37325|rxn37323,MNXR128464,HMR_2966|HMR_0283	6.2.1A2(rev)	Eicosanoyl-CoA	1467885719	C02041	CCCCCCCCCCCCCCCCCCCC(=O)SCCNC(=O)CCNC(=O)C(C(COP(=O)(OP(=O)(OCC1OC(C(C1OP(=O)(O)O)O)n1cnc2c1ncnc2N)O)O)(C)C)O	Benzoylacetyl-CoA	1467923954	C07118				O=C(NCCSC(=O)CC(=O)c1ccccc1)CCNC(=O)C(C(COP(=O)(OP(=O)(OCC1OC(C(C1OP(=O)(O)O)O)n1cnc2c1ncnc2N)O)O)(C)C)O	1
O95573	ACSL3_HUMAN	6.2.1.3	1569818701	33615|RHEA: 33616,Metrxn:127777,OCDCAFATPc|FACOAL180,rxn37341|rxn37338|rxn37333|rxn37328|rxn09449|rxn08454,MNXR102141|MNXR99164,RXN-16380,HMR_2957|HMR_0249	6.2.1A2(rev)	Stearoyl-CoA	1467870680	C00412	CCCCCCCCCCCCCCCCCC(=O)SCCNC(=O)CCNC(=O)C(C(COP(=O)(OP(=O)(OCC1OC(C(C1OP(=O)(O)O)O)n1cnc2c1ncnc2N)O)O)(C)C)O	Thiophene-2-carbonyl-CoA	1467925861	C07347		ChEMBLE_NTD		O=C(NCCSC(=O)c1cccs1)CCNC(=O)C(C(COP(=O)(OP(=O)(OCC1OC(C(C1OP(=O)(O)O)O)n1cnc2c1ncnc2N)O)O)(C)C)O	1
O95573	ACSL3_HUMAN	6.2.1.3	1569880463	46208|RHEA: 46209,Metrxn:127779,FACOAL200,rxn37339|rxn37334|rxn37329|rxn37325|rxn37323,MNXR128464,HMR_2966|HMR_0283	6.2.1A2(rev)	Eicosanoyl-CoA	1467885719	C02041	CCCCCCCCCCCCCCCCCCCC(=O)SCCNC(=O)CCNC(=O)C(C(COP(=O)(OP(=O)(OCC1OC(C(C1OP(=O)(O)O)O)n1cnc2c1ncnc2N)O)O)(C)C)O	[(1R)-2,2,3-Trimethyl-5-oxocyclopent-3-enyl]acetyl-CoA	1467924257	C07160				O=C(NCCSC(=O)CC1C(=O)C=C(C1(C)C)C)CCNC(=O)C(C(COP(=O)(OP(=O)(OCC1OC(C(C1OP(=O)(O)O)O)n1cnc2c1ncnc2N)O)O)(C)C)O	1
O95573	ACSL3_HUMAN	6.2.1.3	1569818701	33615|RHEA: 33616,Metrxn:127777,OCDCAFATPc|FACOAL180,rxn37341|rxn37338|rxn37333|rxn37328|rxn09449|rxn08454,MNXR102141|MNXR99164,RXN-16380,HMR_2957|HMR_0249	6.2.1A2(rev)	Stearoyl-CoA	1467870680	C00412	CCCCCCCCCCCCCCCCCC(=O)SCCNC(=O)CCNC(=O)C(C(COP(=O)(OP(=O)(OCC1OC(C(C1OP(=O)(O)O)O)n1cnc2c1ncnc2N)O)O)(C)C)O	5-Hydroxythiophene-2-carbonyl-CoA	1467925870	C07348				O=C(NCCSC(=O)c1ccc(s1)O)CCNC(=O)C(C(COP(=O)(OP(=O)(OCC1OC(C(C1OP(=O)(O)O)O)n1cnc2c1ncnc2N)O)O)(C)C)O	1
O95573	ACSL3_HUMAN	6.2.1.3	1569880463	46208|RHEA: 46209,Metrxn:127779,FACOAL200,rxn37339|rxn37334|rxn37329|rxn37325|rxn37323,MNXR128464,HMR_2966|HMR_0283	6.2.1A2(rev)	Eicosanoyl-CoA	1467885719	C02041	CCCCCCCCCCCCCCCCCCCC(=O)SCCNC(=O)CCNC(=O)C(C(COP(=O)(OP(=O)(OCC1OC(C(C1OP(=O)(O)O)O)n1cnc2c1ncnc2N)O)O)(C)C)O	3-Oxopristanoyl-CoA	1467925374	C07297			FDB022821|	CC(CCC(=O)C(C(=O)SCCNC(=O)CCNC(=O)C(C(COP(=O)(OP(=O)(OCC1OC(C(C1OP(=O)(O)O)O)n1cnc2c1ncnc2N)O)O)(C)C)O)C)CCCC(CCCC(C)C)C	1
O95573	ACSL3_HUMAN	6.2.1.3	1569818701	33615|RHEA: 33616,Metrxn:127777,OCDCAFATPc|FACOAL180,rxn37341|rxn37338|rxn37333|rxn37328|rxn09449|rxn08454,MNXR102141|MNXR99164,RXN-16380,HMR_2957|HMR_0249	6.2.1A2(rev)	Stearoyl-CoA	1467870680	C00412	CCCCCCCCCCCCCCCCCC(=O)SCCNC(=O)CCNC(=O)C(C(COP(=O)(OP(=O)(OCC1OC(C(C1OP(=O)(O)O)O)n1cnc2c1ncnc2N)O)O)(C)C)O	Cyclohex-2,5-diene-1-carboxyl-CoA	1467951433	C09809				O=C(NCCSC(=O)C1C=CCC=C1)CCNC(=O)C(C(COP(=O)(OP(=O)(OCC1OC(C(C1OP(=O)(O)O)O)n1cnc2c1ncnc2N)O)O)(C)C)O	1
O95573	ACSL3_HUMAN	6.2.1.3	1569880463	46208|RHEA: 46209,Metrxn:127779,FACOAL200,rxn37339|rxn37334|rxn37329|rxn37325|rxn37323,MNXR128464,HMR_2966|HMR_0283	6.2.1A2(rev)	Eicosanoyl-CoA	1467885719	C02041	CCCCCCCCCCCCCCCCCCCC(=O)SCCNC(=O)CCNC(=O)C(C(COP(=O)(OP(=O)(OCC1OC(C(C1OP(=O)(O)O)O)n1cnc2c1ncnc2N)O)O)(C)C)O	3-Hydroxy-3-(3-hydroxy-4-methoxyphenyl)propionyl-CoA	1467925403	C07302				COc1ccc(cc1O)C(CC(=O)SCCNC(=O)CCNC(=O)C(C(COP(=O)(OP(=O)(OCC1OC(C(C1OP(=O)(O)O)O)n1cnc2c1ncnc2N)O)O)(C)C)O)O	1
O95573	ACSL3_HUMAN	6.2.1.3	1569818701	33615|RHEA: 33616,Metrxn:127777,OCDCAFATPc|FACOAL180,rxn37341|rxn37338|rxn37333|rxn37328|rxn09449|rxn08454,MNXR102141|MNXR99164,RXN-16380,HMR_2957|HMR_0249	6.2.1A2(rev)	Stearoyl-CoA	1467870680	C00412	CCCCCCCCCCCCCCCCCC(=O)SCCNC(=O)CCNC(=O)C(C(COP(=O)(OP(=O)(OCC1OC(C(C1OP(=O)(O)O)O)n1cnc2c1ncnc2N)O)O)(C)C)O	Cyclohex-1,4-diene-1-carboxyl-CoA	1467951442	C09810				O=C(NCCSC(=O)C1=CCC=CC1)CCNC(=O)C(C(COP(=O)(OP(=O)(OCC1OC(C(C1OP(=O)(O)O)O)n1cnc2c1ncnc2N)O)O)(C)C)O	1
O95573	ACSL3_HUMAN	6.2.1.3	1569880463	46208|RHEA: 46209,Metrxn:127779,FACOAL200,rxn37339|rxn37334|rxn37329|rxn37325|rxn37323,MNXR128464,HMR_2966|HMR_0283	6.2.1A2(rev)	Eicosanoyl-CoA	1467885719	C02041	CCCCCCCCCCCCCCCCCCCC(=O)SCCNC(=O)CCNC(=O)C(C(COP(=O)(OP(=O)(OCC1OC(C(C1OP(=O)(O)O)O)n1cnc2c1ncnc2N)O)O)(C)C)O	4-Hydroxy-3-methoxyphenyl-beta-hydroxypropanoyl-CoA	1467925412	C07303				COc1cc(ccc1O)C(CC(=O)SCCNC(=O)CCNC(=O)C(C(COP(=O)(OP(=O)(OCC1OC(C(C1OP(=O)(O)O)O)n1cnc2c1ncnc2N)O)O)(C)C)O)O	1
O95573	ACSL3_HUMAN	6.2.1.3	1569818701	33615|RHEA: 33616,Metrxn:127777,OCDCAFATPc|FACOAL180,rxn37341|rxn37338|rxn37333|rxn37328|rxn09449|rxn08454,MNXR102141|MNXR99164,RXN-16380,HMR_2957|HMR_0249	6.2.1A2(rev)	Stearoyl-CoA	1467870680	C00412	CCCCCCCCCCCCCCCCCC(=O)SCCNC(=O)CCNC(=O)C(C(COP(=O)(OP(=O)(OCC1OC(C(C1OP(=O)(O)O)O)n1cnc2c1ncnc2N)O)O)(C)C)O	Cyclohex-1-ene-1-carboxyl-CoA	1467951451	C09811				O=C(NCCSC(=O)C1=CCCCC1)CCNC(=O)C(C(COP(=O)(OP(=O)(OCC1OC(C(C1OP(=O)(O)O)O)n1cnc2c1ncnc2N)O)O)(C)C)O	1
O95573	ACSL3_HUMAN	6.2.1.3	1569880463	46208|RHEA: 46209,Metrxn:127779,FACOAL200,rxn37339|rxn37334|rxn37329|rxn37325|rxn37323,MNXR128464,HMR_2966|HMR_0283	6.2.1A2(rev)	Eicosanoyl-CoA	1467885719	C02041	CCCCCCCCCCCCCCCCCCCC(=O)SCCNC(=O)CCNC(=O)C(C(COP(=O)(OP(=O)(OCC1OC(C(C1OP(=O)(O)O)O)n1cnc2c1ncnc2N)O)O)(C)C)O	2-Hydroxyphytanoyl-CoA	1467925823	C07343			FDB022539|	CC(CCCC(CCCC(C)C)C)CCCC(C(C(=O)SCCNC(=O)CCNC(=O)C(C(COP(=O)(OP(=O)(OCC1OC(C(C1OP(=O)(O)O)O)n1cnc2c1ncnc2N)O)O)(C)C)O)O)C	1
O95573	ACSL3_HUMAN	6.2.1.3	1569818701	33615|RHEA: 33616,Metrxn:127777,OCDCAFATPc|FACOAL180,rxn37341|rxn37338|rxn37333|rxn37328|rxn09449|rxn08454,MNXR102141|MNXR99164,RXN-16380,HMR_2957|HMR_0249	6.2.1A2(rev)	Stearoyl-CoA	1467870680	C00412	CCCCCCCCCCCCCCCCCC(=O)SCCNC(=O)CCNC(=O)C(C(COP(=O)(OP(=O)(OCC1OC(C(C1OP(=O)(O)O)O)n1cnc2c1ncnc2N)O)O)(C)C)O	2-Hydroxycyclohexane-1-carboxyl-CoA	1467951460	C09812				O=C(NCCSC(=O)C1CCCCC1O)CCNC(=O)C(C(COP(=O)(OP(=O)(OCC1OC(C(C1OP(=O)(O)O)O)n1cnc2c1ncnc2N)O)O)(C)C)O	1
O95573	ACSL3_HUMAN	6.2.1.3	1569880463	46208|RHEA: 46209,Metrxn:127779,FACOAL200,rxn37339|rxn37334|rxn37329|rxn37325|rxn37323,MNXR128464,HMR_2966|HMR_0283	6.2.1A2(rev)	Eicosanoyl-CoA	1467885719	C02041	CCCCCCCCCCCCCCCCCCCC(=O)SCCNC(=O)CCNC(=O)C(C(COP(=O)(OP(=O)(OCC1OC(C(C1OP(=O)(O)O)O)n1cnc2c1ncnc2N)O)O)(C)C)O	Thiophene-2-carbonyl-CoA	1467925861	C07347		ChEMBLE_NTD		O=C(NCCSC(=O)c1cccs1)CCNC(=O)C(C(COP(=O)(OP(=O)(OCC1OC(C(C1OP(=O)(O)O)O)n1cnc2c1ncnc2N)O)O)(C)C)O	1
O95573	ACSL3_HUMAN	6.2.1.3	1569818701	33615|RHEA: 33616,Metrxn:127777,OCDCAFATPc|FACOAL180,rxn37341|rxn37338|rxn37333|rxn37328|rxn09449|rxn08454,MNXR102141|MNXR99164,RXN-16380,HMR_2957|HMR_0249	6.2.1A2(rev)	Stearoyl-CoA	1467870680	C00412	CCCCCCCCCCCCCCCCCC(=O)SCCNC(=O)CCNC(=O)C(C(COP(=O)(OP(=O)(OCC1OC(C(C1OP(=O)(O)O)O)n1cnc2c1ncnc2N)O)O)(C)C)O	2-Ketocyclohexane-1-carboxyl-CoA	1467951469	C09813				O=C(NCCSC(=O)C1CCCCC1=O)CCNC(=O)C(C(COP(=O)(OP(=O)(OCC1OC(C(C1OP(=O)(O)O)O)n1cnc2c1ncnc2N)O)O)(C)C)O	1
O95573	ACSL3_HUMAN	6.2.1.3	1569880463	46208|RHEA: 46209,Metrxn:127779,FACOAL200,rxn37339|rxn37334|rxn37329|rxn37325|rxn37323,MNXR128464,HMR_2966|HMR_0283	6.2.1A2(rev)	Eicosanoyl-CoA	1467885719	C02041	CCCCCCCCCCCCCCCCCCCC(=O)SCCNC(=O)CCNC(=O)C(C(COP(=O)(OP(=O)(OCC1OC(C(C1OP(=O)(O)O)O)n1cnc2c1ncnc2N)O)O)(C)C)O	5-Hydroxythiophene-2-carbonyl-CoA	1467925870	C07348				O=C(NCCSC(=O)c1ccc(s1)O)CCNC(=O)C(C(COP(=O)(OP(=O)(OCC1OC(C(C1OP(=O)(O)O)O)n1cnc2c1ncnc2N)O)O)(C)C)O	1
O95573	ACSL3_HUMAN	6.2.1.3	1569818701	33615|RHEA: 33616,Metrxn:127777,OCDCAFATPc|FACOAL180,rxn37341|rxn37338|rxn37333|rxn37328|rxn09449|rxn08454,MNXR102141|MNXR99164,RXN-16380,HMR_2957|HMR_0249	6.2.1A2(rev)	Stearoyl-CoA	1467870680	C00412	CCCCCCCCCCCCCCCCCC(=O)SCCNC(=O)CCNC(=O)C(C(COP(=O)(OP(=O)(OCC1OC(C(C1OP(=O)(O)O)O)n1cnc2c1ncnc2N)O)O)(C)C)O	Benzylsuccinyl-CoA	1467951516	C09817				O=C(NCCSC(=O)C(Cc1ccccc1)CC(=O)O)CCNC(=O)C(C(COP(=O)(OP(=O)(OCC1OC(C(C1OP(=O)(O)O)O)n1cnc2c1ncnc2N)O)O)(C)C)O	1
O95573	ACSL3_HUMAN	6.2.1.3	1569880463	46208|RHEA: 46209,Metrxn:127779,FACOAL200,rxn37339|rxn37334|rxn37329|rxn37325|rxn37323,MNXR128464,HMR_2966|HMR_0283	6.2.1A2(rev)	Eicosanoyl-CoA	1467885719	C02041	CCCCCCCCCCCCCCCCCCCC(=O)SCCNC(=O)CCNC(=O)C(C(COP(=O)(OP(=O)(OCC1OC(C(C1OP(=O)(O)O)O)n1cnc2c1ncnc2N)O)O)(C)C)O	Cyclohex-2,5-diene-1-carboxyl-CoA	1467951433	C09809				O=C(NCCSC(=O)C1C=CCC=C1)CCNC(=O)C(C(COP(=O)(OP(=O)(OCC1OC(C(C1OP(=O)(O)O)O)n1cnc2c1ncnc2N)O)O)(C)C)O	1
O95573	ACSL3_HUMAN	6.2.1.3	1569818701	33615|RHEA: 33616,Metrxn:127777,OCDCAFATPc|FACOAL180,rxn37341|rxn37338|rxn37333|rxn37328|rxn09449|rxn08454,MNXR102141|MNXR99164,RXN-16380,HMR_2957|HMR_0249	6.2.1A2(rev)	Stearoyl-CoA	1467870680	C00412	CCCCCCCCCCCCCCCCCC(=O)SCCNC(=O)CCNC(=O)C(C(COP(=O)(OP(=O)(OCC1OC(C(C1OP(=O)(O)O)O)n1cnc2c1ncnc2N)O)O)(C)C)O	E-Phenylitaconyl-CoA	1467951526	C09818			FDB028867|	O=C(NCCSC(=O)C(=Cc1ccccc1)CC(=O)O)CCNC(=O)C(C(COP(=O)(OP(=O)(OCC1OC(C(C1OP(=O)(O)O)O)n1cnc2c1ncnc2N)O)O)(C)C)O	1
O95573	ACSL3_HUMAN	6.2.1.3	1569880463	46208|RHEA: 46209,Metrxn:127779,FACOAL200,rxn37339|rxn37334|rxn37329|rxn37325|rxn37323,MNXR128464,HMR_2966|HMR_0283	6.2.1A2(rev)	Eicosanoyl-CoA	1467885719	C02041	CCCCCCCCCCCCCCCCCCCC(=O)SCCNC(=O)CCNC(=O)C(C(COP(=O)(OP(=O)(OCC1OC(C(C1OP(=O)(O)O)O)n1cnc2c1ncnc2N)O)O)(C)C)O	Cyclohex-1,4-diene-1-carboxyl-CoA	1467951442	C09810				O=C(NCCSC(=O)C1=CCC=CC1)CCNC(=O)C(C(COP(=O)(OP(=O)(OCC1OC(C(C1OP(=O)(O)O)O)n1cnc2c1ncnc2N)O)O)(C)C)O	1
O95573	ACSL3_HUMAN	6.2.1.3	1569818701	33615|RHEA: 33616,Metrxn:127777,OCDCAFATPc|FACOAL180,rxn37341|rxn37338|rxn37333|rxn37328|rxn09449|rxn08454,MNXR102141|MNXR99164,RXN-16380,HMR_2957|HMR_0249	6.2.1A2(rev)	Stearoyl-CoA	1467870680	C00412	CCCCCCCCCCCCCCCCCC(=O)SCCNC(=O)CCNC(=O)C(C(COP(=O)(OP(=O)(OCC1OC(C(C1OP(=O)(O)O)O)n1cnc2c1ncnc2N)O)O)(C)C)O	(Hydroxymethylphenyl)succinyl-CoA	1467951536	C09819			FDB028802|	O=C(NCCSC(=O)C(C(c1ccccc1)O)CC(=O)O)CCNC(=O)C(C(COP(=O)(OP(=O)(OCC1OC(C(C1OP(=O)(O)O)O)n1cnc2c1ncnc2N)O)O)(C)C)O	1
O95573	ACSL3_HUMAN	6.2.1.3	1569880463	46208|RHEA: 46209,Metrxn:127779,FACOAL200,rxn37339|rxn37334|rxn37329|rxn37325|rxn37323,MNXR128464,HMR_2966|HMR_0283	6.2.1A2(rev)	Eicosanoyl-CoA	1467885719	C02041	CCCCCCCCCCCCCCCCCCCC(=O)SCCNC(=O)CCNC(=O)C(C(COP(=O)(OP(=O)(OCC1OC(C(C1OP(=O)(O)O)O)n1cnc2c1ncnc2N)O)O)(C)C)O	Cyclohex-1-ene-1-carboxyl-CoA	1467951451	C09811				O=C(NCCSC(=O)C1=CCCCC1)CCNC(=O)C(C(COP(=O)(OP(=O)(OCC1OC(C(C1OP(=O)(O)O)O)n1cnc2c1ncnc2N)O)O)(C)C)O	1
O95573	ACSL3_HUMAN	6.2.1.3	1569818701	33615|RHEA: 33616,Metrxn:127777,OCDCAFATPc|FACOAL180,rxn37341|rxn37338|rxn37333|rxn37328|rxn09449|rxn08454,MNXR102141|MNXR99164,RXN-16380,HMR_2957|HMR_0249	6.2.1A2(rev)	Stearoyl-CoA	1467870680	C00412	CCCCCCCCCCCCCCCCCC(=O)SCCNC(=O)CCNC(=O)C(C(COP(=O)(OP(=O)(OCC1OC(C(C1OP(=O)(O)O)O)n1cnc2c1ncnc2N)O)O)(C)C)O	Benzoylsuccinyl-CoA	1467951545	C09820				O=C(NCCSC(=O)C(C(=O)c1ccccc1)CC(=O)O)CCNC(=O)C(C(COP(=O)(OP(=O)(OCC1OC(C(C1OP(=O)(O)O)O)n1cnc2c1ncnc2N)O)O)(C)C)O	1
O95573	ACSL3_HUMAN	6.2.1.3	1569880463	46208|RHEA: 46209,Metrxn:127779,FACOAL200,rxn37339|rxn37334|rxn37329|rxn37325|rxn37323,MNXR128464,HMR_2966|HMR_0283	6.2.1A2(rev)	Eicosanoyl-CoA	1467885719	C02041	CCCCCCCCCCCCCCCCCCCC(=O)SCCNC(=O)CCNC(=O)C(C(COP(=O)(OP(=O)(OCC1OC(C(C1OP(=O)(O)O)O)n1cnc2c1ncnc2N)O)O)(C)C)O	2-Hydroxycyclohexane-1-carboxyl-CoA	1467951460	C09812				O=C(NCCSC(=O)C1CCCCC1O)CCNC(=O)C(C(COP(=O)(OP(=O)(OCC1OC(C(C1OP(=O)(O)O)O)n1cnc2c1ncnc2N)O)O)(C)C)O	1
O95573	ACSL3_HUMAN	6.2.1.3	1569818701	33615|RHEA: 33616,Metrxn:127777,OCDCAFATPc|FACOAL180,rxn37341|rxn37338|rxn37333|rxn37328|rxn09449|rxn08454,MNXR102141|MNXR99164,RXN-16380,HMR_2957|HMR_0249	6.2.1A2(rev)	Stearoyl-CoA	1467870680	C00412	CCCCCCCCCCCCCCCCCC(=O)SCCNC(=O)CCNC(=O)C(C(COP(=O)(OP(=O)(OCC1OC(C(C1OP(=O)(O)O)O)n1cnc2c1ncnc2N)O)O)(C)C)O	6-Oxocyclohex-1-ene-1-carbonyl-CoA	1467951555	C09821			FDB028834|	O=C(NCCSC(=O)C1=CCCCC1=O)CCNC(=O)C(C(COP(=O)(OP(=O)(OCC1OC(C(C1OP(=O)(O)O)O)n1cnc2c1ncnc2N)O)O)(C)C)O	1
O95573	ACSL3_HUMAN	6.2.1.3	1569880463	46208|RHEA: 46209,Metrxn:127779,FACOAL200,rxn37339|rxn37334|rxn37329|rxn37325|rxn37323,MNXR128464,HMR_2966|HMR_0283	6.2.1A2(rev)	Eicosanoyl-CoA	1467885719	C02041	CCCCCCCCCCCCCCCCCCCC(=O)SCCNC(=O)CCNC(=O)C(C(COP(=O)(OP(=O)(OCC1OC(C(C1OP(=O)(O)O)O)n1cnc2c1ncnc2N)O)O)(C)C)O	2-Ketocyclohexane-1-carboxyl-CoA	1467951469	C09813				O=C(NCCSC(=O)C1CCCCC1=O)CCNC(=O)C(C(COP(=O)(OP(=O)(OCC1OC(C(C1OP(=O)(O)O)O)n1cnc2c1ncnc2N)O)O)(C)C)O	1
O95573	ACSL3_HUMAN	6.2.1.3	1569818701	33615|RHEA: 33616,Metrxn:127777,OCDCAFATPc|FACOAL180,rxn37341|rxn37338|rxn37333|rxn37328|rxn09449|rxn08454,MNXR102141|MNXR99164,RXN-16380,HMR_2957|HMR_0249	6.2.1A2(rev)	Stearoyl-CoA	1467870680	C00412	CCCCCCCCCCCCCCCCCC(=O)SCCNC(=O)CCNC(=O)C(C(COP(=O)(OP(=O)(OCC1OC(C(C1OP(=O)(O)O)O)n1cnc2c1ncnc2N)O)O)(C)C)O	2,6-Dihydroxycyclohexane-1-carboxyl-CoA	1467951588	C09824				O=C(NCCSC(=O)C1C(O)CCCC1O)CCNC(=O)C(C(COP(=O)(OP(=O)(OCC1OC(C(C1OP(=O)(O)O)O)n1cnc2c1ncnc2N)O)O)(C)C)O	1
O95573	ACSL3_HUMAN	6.2.1.3	1569880463	46208|RHEA: 46209,Metrxn:127779,FACOAL200,rxn37339|rxn37334|rxn37329|rxn37325|rxn37323,MNXR128464,HMR_2966|HMR_0283	6.2.1A2(rev)	Eicosanoyl-CoA	1467885719	C02041	CCCCCCCCCCCCCCCCCCCC(=O)SCCNC(=O)CCNC(=O)C(C(COP(=O)(OP(=O)(OCC1OC(C(C1OP(=O)(O)O)O)n1cnc2c1ncnc2N)O)O)(C)C)O	Benzylsuccinyl-CoA	1467951516	C09817				O=C(NCCSC(=O)C(Cc1ccccc1)CC(=O)O)CCNC(=O)C(C(COP(=O)(OP(=O)(OCC1OC(C(C1OP(=O)(O)O)O)n1cnc2c1ncnc2N)O)O)(C)C)O	1
O95573	ACSL3_HUMAN	6.2.1.3	1569818701	33615|RHEA: 33616,Metrxn:127777,OCDCAFATPc|FACOAL180,rxn37341|rxn37338|rxn37333|rxn37328|rxn09449|rxn08454,MNXR102141|MNXR99164,RXN-16380,HMR_2957|HMR_0249	6.2.1A2(rev)	Stearoyl-CoA	1467870680	C00412	CCCCCCCCCCCCCCCCCC(=O)SCCNC(=O)CCNC(=O)C(C(COP(=O)(OP(=O)(OCC1OC(C(C1OP(=O)(O)O)O)n1cnc2c1ncnc2N)O)O)(C)C)O	2-Hydroxy-6-oxocyclohexane-1-carbonyl-CoA	1467951597	C09825				O=C(NCCSC(=O)C1C(O)CCCC1=O)CCNC(=O)C(C(COP(=O)(OP(=O)(OCC1OC(C(C1OP(=O)(O)O)O)n1cnc2c1ncnc2N)O)O)(C)C)O	1
O95573	ACSL3_HUMAN	6.2.1.3	1569880463	46208|RHEA: 46209,Metrxn:127779,FACOAL200,rxn37339|rxn37334|rxn37329|rxn37325|rxn37323,MNXR128464,HMR_2966|HMR_0283	6.2.1A2(rev)	Eicosanoyl-CoA	1467885719	C02041	CCCCCCCCCCCCCCCCCCCC(=O)SCCNC(=O)CCNC(=O)C(C(COP(=O)(OP(=O)(OCC1OC(C(C1OP(=O)(O)O)O)n1cnc2c1ncnc2N)O)O)(C)C)O	E-Phenylitaconyl-CoA	1467951526	C09818			FDB028867|	O=C(NCCSC(=O)C(=Cc1ccccc1)CC(=O)O)CCNC(=O)C(C(COP(=O)(OP(=O)(OCC1OC(C(C1OP(=O)(O)O)O)n1cnc2c1ncnc2N)O)O)(C)C)O	1
O95573	ACSL3_HUMAN	6.2.1.3	1569818701	33615|RHEA: 33616,Metrxn:127777,OCDCAFATPc|FACOAL180,rxn37341|rxn37338|rxn37333|rxn37328|rxn09449|rxn08454,MNXR102141|MNXR99164,RXN-16380,HMR_2957|HMR_0249	6.2.1A2(rev)	Stearoyl-CoA	1467870680	C00412	CCCCCCCCCCCCCCCCCC(=O)SCCNC(=O)CCNC(=O)C(C(COP(=O)(OP(=O)(OCC1OC(C(C1OP(=O)(O)O)O)n1cnc2c1ncnc2N)O)O)(C)C)O	4-Hydroxybutyryl-CoA	1467966634	C11062				OCCCC(=O)SCCNC(=O)CCNC(=O)C(C(COP(=O)(OP(=O)(OCC1OC(C(C1OP(=O)(O)O)O)n1cnc2c1ncnc2N)O)O)(C)C)O	1
O95573	ACSL3_HUMAN	6.2.1.3	1569880463	46208|RHEA: 46209,Metrxn:127779,FACOAL200,rxn37339|rxn37334|rxn37329|rxn37325|rxn37323,MNXR128464,HMR_2966|HMR_0283	6.2.1A2(rev)	Eicosanoyl-CoA	1467885719	C02041	CCCCCCCCCCCCCCCCCCCC(=O)SCCNC(=O)CCNC(=O)C(C(COP(=O)(OP(=O)(OCC1OC(C(C1OP(=O)(O)O)O)n1cnc2c1ncnc2N)O)O)(C)C)O	(Hydroxymethylphenyl)succinyl-CoA	1467951536	C09819			FDB028802|	O=C(NCCSC(=O)C(C(c1ccccc1)O)CC(=O)O)CCNC(=O)C(C(COP(=O)(OP(=O)(OCC1OC(C(C1OP(=O)(O)O)O)n1cnc2c1ncnc2N)O)O)(C)C)O	1
O95573	ACSL3_HUMAN	6.2.1.3	1569818701	33615|RHEA: 33616,Metrxn:127777,OCDCAFATPc|FACOAL180,rxn37341|rxn37338|rxn37333|rxn37328|rxn09449|rxn08454,MNXR102141|MNXR99164,RXN-16380,HMR_2957|HMR_0249	6.2.1A2(rev)	Stearoyl-CoA	1467870680	C00412	CCCCCCCCCCCCCCCCCC(=O)SCCNC(=O)CCNC(=O)C(C(COP(=O)(OP(=O)(OCC1OC(C(C1OP(=O)(O)O)O)n1cnc2c1ncnc2N)O)O)(C)C)O	(3R)-3-Isopropenyl-6-oxoheptanoyl-CoA	1467970157	C11407,C11421				O=C(NCCSC(=O)CC(C(=C)C)CCC(=O)C)CCNC(=O)C(C(COP(=O)(OP(=O)(OCC1OC(C(C1OP(=O)(O)O)O)n1cnc2c1ncnc2N)O)O)(C)C)O	1
O95573	ACSL3_HUMAN	6.2.1.3	1569880463	46208|RHEA: 46209,Metrxn:127779,FACOAL200,rxn37339|rxn37334|rxn37329|rxn37325|rxn37323,MNXR128464,HMR_2966|HMR_0283	6.2.1A2(rev)	Eicosanoyl-CoA	1467885719	C02041	CCCCCCCCCCCCCCCCCCCC(=O)SCCNC(=O)CCNC(=O)C(C(COP(=O)(OP(=O)(OCC1OC(C(C1OP(=O)(O)O)O)n1cnc2c1ncnc2N)O)O)(C)C)O	Benzoylsuccinyl-CoA	1467951545	C09820				O=C(NCCSC(=O)C(C(=O)c1ccccc1)CC(=O)O)CCNC(=O)C(C(COP(=O)(OP(=O)(OCC1OC(C(C1OP(=O)(O)O)O)n1cnc2c1ncnc2N)O)O)(C)C)O	1
O95573	ACSL3_HUMAN	6.2.1.3	1569818701	33615|RHEA: 33616,Metrxn:127777,OCDCAFATPc|FACOAL180,rxn37341|rxn37338|rxn37333|rxn37328|rxn09449|rxn08454,MNXR102141|MNXR99164,RXN-16380,HMR_2957|HMR_0249	6.2.1A2(rev)	Stearoyl-CoA	1467870680	C00412	CCCCCCCCCCCCCCCCCC(=O)SCCNC(=O)CCNC(=O)C(C(COP(=O)(OP(=O)(OCC1OC(C(C1OP(=O)(O)O)O)n1cnc2c1ncnc2N)O)O)(C)C)O	3,4-Dihydro-7-methoxy-2-methylene-3-oxo-2H-1,4-benzoxazine-5-carbonyl-CoA	1467970541	C11448				COc1cc2oc(=C)c(=O)[nH]c2c(c1)C(=O)SCCNC(=O)CCNC(=O)C(C(COP(=O)(OP(=O)(OCC1OC(C(C1OP(=O)(O)O)O)n1cnc2c1ncnc2N)O)O)(C)C)O	1
O95573	ACSL3_HUMAN	6.2.1.3	1569880463	46208|RHEA: 46209,Metrxn:127779,FACOAL200,rxn37339|rxn37334|rxn37329|rxn37325|rxn37323,MNXR128464,HMR_2966|HMR_0283	6.2.1A2(rev)	Eicosanoyl-CoA	1467885719	C02041	CCCCCCCCCCCCCCCCCCCC(=O)SCCNC(=O)CCNC(=O)C(C(COP(=O)(OP(=O)(OCC1OC(C(C1OP(=O)(O)O)O)n1cnc2c1ncnc2N)O)O)(C)C)O	6-Oxocyclohex-1-ene-1-carbonyl-CoA	1467951555	C09821			FDB028834|	O=C(NCCSC(=O)C1=CCCCC1=O)CCNC(=O)C(C(COP(=O)(OP(=O)(OCC1OC(C(C1OP(=O)(O)O)O)n1cnc2c1ncnc2N)O)O)(C)C)O	1
O95573	ACSL3_HUMAN	6.2.1.3	1569818701	33615|RHEA: 33616,Metrxn:127777,OCDCAFATPc|FACOAL180,rxn37341|rxn37338|rxn37333|rxn37328|rxn09449|rxn08454,MNXR102141|MNXR99164,RXN-16380,HMR_2957|HMR_0249	6.2.1A2(rev)	Stearoyl-CoA	1467870680	C00412	CCCCCCCCCCCCCCCCCC(=O)SCCNC(=O)CCNC(=O)C(C(COP(=O)(OP(=O)(OCC1OC(C(C1OP(=O)(O)O)O)n1cnc2c1ncnc2N)O)O)(C)C)O	Perillyl-CoA	1467975355	C11929				O=C(NCCSC(=O)C1=CCC(CC1)C(=C)C)CCNC(=O)C(C(COP(=O)(OP(=O)(OCC1OC(C(C1OP(=O)(O)O)O)n1cnc2c1ncnc2N)O)O)(C)C)O	1
O95573	ACSL3_HUMAN	6.2.1.3	1569880463	46208|RHEA: 46209,Metrxn:127779,FACOAL200,rxn37339|rxn37334|rxn37329|rxn37325|rxn37323,MNXR128464,HMR_2966|HMR_0283	6.2.1A2(rev)	Eicosanoyl-CoA	1467885719	C02041	CCCCCCCCCCCCCCCCCCCC(=O)SCCNC(=O)CCNC(=O)C(C(COP(=O)(OP(=O)(OCC1OC(C(C1OP(=O)(O)O)O)n1cnc2c1ncnc2N)O)O)(C)C)O	2,6-Dihydroxycyclohexane-1-carboxyl-CoA	1467951588	C09824				O=C(NCCSC(=O)C1C(O)CCCC1O)CCNC(=O)C(C(COP(=O)(OP(=O)(OCC1OC(C(C1OP(=O)(O)O)O)n1cnc2c1ncnc2N)O)O)(C)C)O	1
O95573	ACSL3_HUMAN	6.2.1.3	1569818701	33615|RHEA: 33616,Metrxn:127777,OCDCAFATPc|FACOAL180,rxn37341|rxn37338|rxn37333|rxn37328|rxn09449|rxn08454,MNXR102141|MNXR99164,RXN-16380,HMR_2957|HMR_0249	6.2.1A2(rev)	Stearoyl-CoA	1467870680	C00412	CCCCCCCCCCCCCCCCCC(=O)SCCNC(=O)CCNC(=O)C(C(COP(=O)(OP(=O)(OCC1OC(C(C1OP(=O)(O)O)O)n1cnc2c1ncnc2N)O)O)(C)C)O	2-Hydroxy-4-isopropenylcyclohexane-1-carboxyl-CoA	1467975409	C11934				O=C(NCCSC(=O)C1CCC(CC1O)C(=C)C)CCNC(=O)C(C(COP(=O)(OP(=O)(OCC1OC(C(C1OP(=O)(O)O)O)n1cnc2c1ncnc2N)O)O)(C)C)O	1
O95573	ACSL3_HUMAN	6.2.1.3	1569880463	46208|RHEA: 46209,Metrxn:127779,FACOAL200,rxn37339|rxn37334|rxn37329|rxn37325|rxn37323,MNXR128464,HMR_2966|HMR_0283	6.2.1A2(rev)	Eicosanoyl-CoA	1467885719	C02041	CCCCCCCCCCCCCCCCCCCC(=O)SCCNC(=O)CCNC(=O)C(C(COP(=O)(OP(=O)(OCC1OC(C(C1OP(=O)(O)O)O)n1cnc2c1ncnc2N)O)O)(C)C)O	2-Hydroxy-6-oxocyclohexane-1-carbonyl-CoA	1467951597	C09825				O=C(NCCSC(=O)C1C(O)CCCC1=O)CCNC(=O)C(C(COP(=O)(OP(=O)(OCC1OC(C(C1OP(=O)(O)O)O)n1cnc2c1ncnc2N)O)O)(C)C)O	1
O95573	ACSL3_HUMAN	6.2.1.3	1569818701	33615|RHEA: 33616,Metrxn:127777,OCDCAFATPc|FACOAL180,rxn37341|rxn37338|rxn37333|rxn37328|rxn09449|rxn08454,MNXR102141|MNXR99164,RXN-16380,HMR_2957|HMR_0249	6.2.1A2(rev)	Stearoyl-CoA	1467870680	C00412	CCCCCCCCCCCCCCCCCC(=O)SCCNC(=O)CCNC(=O)C(C(COP(=O)(OP(=O)(OCC1OC(C(C1OP(=O)(O)O)O)n1cnc2c1ncnc2N)O)O)(C)C)O	4-Isopropenyl-2-oxy-cyclohexanecarboxyl-CoA	1467975419	C11935				O=C(NCCSC(=O)C1CCC(CC1=O)C(=C)C)CCNC(=O)C(C(COP(=O)(OP(=O)(OCC1OC(C(C1OP(=O)(O)O)O)n1cnc2c1ncnc2N)O)O)(C)C)O	1
O95573	ACSL3_HUMAN	6.2.1.3	1569880463	46208|RHEA: 46209,Metrxn:127779,FACOAL200,rxn37339|rxn37334|rxn37329|rxn37325|rxn37323,MNXR128464,HMR_2966|HMR_0283	6.2.1A2(rev)	Eicosanoyl-CoA	1467885719	C02041	CCCCCCCCCCCCCCCCCCCC(=O)SCCNC(=O)CCNC(=O)C(C(COP(=O)(OP(=O)(OCC1OC(C(C1OP(=O)(O)O)O)n1cnc2c1ncnc2N)O)O)(C)C)O	4-Hydroxybutyryl-CoA	1467966634	C11062				OCCCC(=O)SCCNC(=O)CCNC(=O)C(C(COP(=O)(OP(=O)(OCC1OC(C(C1OP(=O)(O)O)O)n1cnc2c1ncnc2N)O)O)(C)C)O	1
O95573	ACSL3_HUMAN	6.2.1.3	1569818701	33615|RHEA: 33616,Metrxn:127777,OCDCAFATPc|FACOAL180,rxn37341|rxn37338|rxn37333|rxn37328|rxn09449|rxn08454,MNXR102141|MNXR99164,RXN-16380,HMR_2957|HMR_0249	6.2.1A2(rev)	Stearoyl-CoA	1467870680	C00412	CCCCCCCCCCCCCCCCCC(=O)SCCNC(=O)CCNC(=O)C(C(COP(=O)(OP(=O)(OCC1OC(C(C1OP(=O)(O)O)O)n1cnc2c1ncnc2N)O)O)(C)C)O	3-Isopropenylpimelyl-CoA	1467975430	C11936				O=C(NCCSC(=O)CCCC(C(=C)C)CC(=O)O)CCNC(=O)C(C(COP(=O)(OP(=O)(OCC1OC(C(C1OP(=O)(O)O)O)n1cnc2c1ncnc2N)O)O)(C)C)O	1
O95573	ACSL3_HUMAN	6.2.1.3	1569880463	46208|RHEA: 46209,Metrxn:127779,FACOAL200,rxn37339|rxn37334|rxn37329|rxn37325|rxn37323,MNXR128464,HMR_2966|HMR_0283	6.2.1A2(rev)	Eicosanoyl-CoA	1467885719	C02041	CCCCCCCCCCCCCCCCCCCC(=O)SCCNC(=O)CCNC(=O)C(C(COP(=O)(OP(=O)(OCC1OC(C(C1OP(=O)(O)O)O)n1cnc2c1ncnc2N)O)O)(C)C)O	(3R)-3-Isopropenyl-6-oxoheptanoyl-CoA	1467970157	C11407,C11421				O=C(NCCSC(=O)CC(C(=C)C)CCC(=O)C)CCNC(=O)C(C(COP(=O)(OP(=O)(OCC1OC(C(C1OP(=O)(O)O)O)n1cnc2c1ncnc2N)O)O)(C)C)O	1
O95573	ACSL3_HUMAN	6.2.1.3	1569818701	33615|RHEA: 33616,Metrxn:127777,OCDCAFATPc|FACOAL180,rxn37341|rxn37338|rxn37333|rxn37328|rxn09449|rxn08454,MNXR102141|MNXR99164,RXN-16380,HMR_2957|HMR_0249	6.2.1A2(rev)	Stearoyl-CoA	1467870680	C00412	CCCCCCCCCCCCCCCCCC(=O)SCCNC(=O)CCNC(=O)C(C(COP(=O)(OP(=O)(OCC1OC(C(C1OP(=O)(O)O)O)n1cnc2c1ncnc2N)O)O)(C)C)O	trans-2-Methyl-5-isopropylhexa-2,5-dienoyl-CoA	1467975539	C11945,C11946			FDB023961|	O=C(NCCSC(=O)C(=CCC(=C)C(C)C)C)CCNC(=O)C(C(COP(=O)(OP(=O)(OCC1OC(C(C1OP(=O)(O)O)O)n1cnc2c1ncnc2N)O)O)(C)C)O	1
O95573	ACSL3_HUMAN	6.2.1.3	1569880463	46208|RHEA: 46209,Metrxn:127779,FACOAL200,rxn37339|rxn37334|rxn37329|rxn37325|rxn37323,MNXR128464,HMR_2966|HMR_0283	6.2.1A2(rev)	Eicosanoyl-CoA	1467885719	C02041	CCCCCCCCCCCCCCCCCCCC(=O)SCCNC(=O)CCNC(=O)C(C(COP(=O)(OP(=O)(OCC1OC(C(C1OP(=O)(O)O)O)n1cnc2c1ncnc2N)O)O)(C)C)O	3,4-Dihydro-7-methoxy-2-methylene-3-oxo-2H-1,4-benzoxazine-5-carbonyl-CoA	1467970541	C11448				COc1cc2oc(=C)c(=O)[nH]c2c(c1)C(=O)SCCNC(=O)CCNC(=O)C(C(COP(=O)(OP(=O)(OCC1OC(C(C1OP(=O)(O)O)O)n1cnc2c1ncnc2N)O)O)(C)C)O	1
O95573	ACSL3_HUMAN	6.2.1.3	1569818701	33615|RHEA: 33616,Metrxn:127777,OCDCAFATPc|FACOAL180,rxn37341|rxn37338|rxn37333|rxn37328|rxn09449|rxn08454,MNXR102141|MNXR99164,RXN-16380,HMR_2957|HMR_0249	6.2.1A2(rev)	Stearoyl-CoA	1467870680	C00412	CCCCCCCCCCCCCCCCCC(=O)SCCNC(=O)CCNC(=O)C(C(COP(=O)(OP(=O)(OCC1OC(C(C1OP(=O)(O)O)O)n1cnc2c1ncnc2N)O)O)(C)C)O	3-Hydroxy-2,6-dimethyl-5-methylene-heptanoyl-CoA	1467975559	C11947			FDB023380|	O=C(NCCSC(=O)C(C(CC(=C)C(C)C)O)C)CCNC(=O)C(C(COP(=O)(OP(=O)(OCC1OC(C(C1OP(=O)(O)O)O)n1cnc2c1ncnc2N)O)O)(C)C)O	1
O95573	ACSL3_HUMAN	6.2.1.3	1569880463	46208|RHEA: 46209,Metrxn:127779,FACOAL200,rxn37339|rxn37334|rxn37329|rxn37325|rxn37323,MNXR128464,HMR_2966|HMR_0283	6.2.1A2(rev)	Eicosanoyl-CoA	1467885719	C02041	CCCCCCCCCCCCCCCCCCCC(=O)SCCNC(=O)CCNC(=O)C(C(COP(=O)(OP(=O)(OCC1OC(C(C1OP(=O)(O)O)O)n1cnc2c1ncnc2N)O)O)(C)C)O	Perillyl-CoA	1467975355	C11929				O=C(NCCSC(=O)C1=CCC(CC1)C(=C)C)CCNC(=O)C(C(COP(=O)(OP(=O)(OCC1OC(C(C1OP(=O)(O)O)O)n1cnc2c1ncnc2N)O)O)(C)C)O	1
O95573	ACSL3_HUMAN	6.2.1.3	1569818701	33615|RHEA: 33616,Metrxn:127777,OCDCAFATPc|FACOAL180,rxn37341|rxn37338|rxn37333|rxn37328|rxn09449|rxn08454,MNXR102141|MNXR99164,RXN-16380,HMR_2957|HMR_0249	6.2.1A2(rev)	Stearoyl-CoA	1467870680	C00412	CCCCCCCCCCCCCCCCCC(=O)SCCNC(=O)CCNC(=O)C(C(COP(=O)(OP(=O)(OCC1OC(C(C1OP(=O)(O)O)O)n1cnc2c1ncnc2N)O)O)(C)C)O	2,6-Dimethyl-5-methylene-3-oxo-heptanoyl-CoA	1467975569	C11948				O=C(NCCSC(=O)C(C(=O)CC(=C)C(C)C)C)CCNC(=O)C(C(COP(=O)(OP(=O)(OCC1OC(C(C1OP(=O)(O)O)O)n1cnc2c1ncnc2N)O)O)(C)C)O	1
O95573	ACSL3_HUMAN	6.2.1.3	1569880463	46208|RHEA: 46209,Metrxn:127779,FACOAL200,rxn37339|rxn37334|rxn37329|rxn37325|rxn37323,MNXR128464,HMR_2966|HMR_0283	6.2.1A2(rev)	Eicosanoyl-CoA	1467885719	C02041	CCCCCCCCCCCCCCCCCCCC(=O)SCCNC(=O)CCNC(=O)C(C(COP(=O)(OP(=O)(OCC1OC(C(C1OP(=O)(O)O)O)n1cnc2c1ncnc2N)O)O)(C)C)O	2-Hydroxy-4-isopropenylcyclohexane-1-carboxyl-CoA	1467975409	C11934				O=C(NCCSC(=O)C1CCC(CC1O)C(=C)C)CCNC(=O)C(C(COP(=O)(OP(=O)(OCC1OC(C(C1OP(=O)(O)O)O)n1cnc2c1ncnc2N)O)O)(C)C)O	1
O95573	ACSL3_HUMAN	6.2.1.3	1569818701	33615|RHEA: 33616,Metrxn:127777,OCDCAFATPc|FACOAL180,rxn37341|rxn37338|rxn37333|rxn37328|rxn09449|rxn08454,MNXR102141|MNXR99164,RXN-16380,HMR_2957|HMR_0249	6.2.1A2(rev)	Stearoyl-CoA	1467870680	C00412	CCCCCCCCCCCCCCCCCC(=O)SCCNC(=O)CCNC(=O)C(C(COP(=O)(OP(=O)(OCC1OC(C(C1OP(=O)(O)O)O)n1cnc2c1ncnc2N)O)O)(C)C)O	3-Isopropylbut-3-enoyl-CoA	1467975579	C11949				O=C(NCCSC(=O)CC(=C)C(C)C)CCNC(=O)C(C(COP(=O)(OP(=O)(OCC1OC(C(C1OP(=O)(O)O)O)n1cnc2c1ncnc2N)O)O)(C)C)O	1
O95573	ACSL3_HUMAN	6.2.1.3	1569880463	46208|RHEA: 46209,Metrxn:127779,FACOAL200,rxn37339|rxn37334|rxn37329|rxn37325|rxn37323,MNXR128464,HMR_2966|HMR_0283	6.2.1A2(rev)	Eicosanoyl-CoA	1467885719	C02041	CCCCCCCCCCCCCCCCCCCC(=O)SCCNC(=O)CCNC(=O)C(C(COP(=O)(OP(=O)(OCC1OC(C(C1OP(=O)(O)O)O)n1cnc2c1ncnc2N)O)O)(C)C)O	4-Isopropenyl-2-oxy-cyclohexanecarboxyl-CoA	1467975419	C11935				O=C(NCCSC(=O)C1CCC(CC1=O)C(=C)C)CCNC(=O)C(C(COP(=O)(OP(=O)(OCC1OC(C(C1OP(=O)(O)O)O)n1cnc2c1ncnc2N)O)O)(C)C)O	1
O95573	ACSL3_HUMAN	6.2.1.3	1569818701	33615|RHEA: 33616,Metrxn:127777,OCDCAFATPc|FACOAL180,rxn37341|rxn37338|rxn37333|rxn37328|rxn09449|rxn08454,MNXR102141|MNXR99164,RXN-16380,HMR_2957|HMR_0249	6.2.1A2(rev)	Stearoyl-CoA	1467870680	C00412	CCCCCCCCCCCCCCCCCC(=O)SCCNC(=O)CCNC(=O)C(C(COP(=O)(OP(=O)(OCC1OC(C(C1OP(=O)(O)O)O)n1cnc2c1ncnc2N)O)O)(C)C)O	3,5-Dihydroxyphenylacetyl-CoA	1467979373	C12324				O=C(NCCSC(=O)Cc1cc(O)cc(c1)O)CCNC(=O)C(C(COP(=O)(OP(=O)(OCC1OC(C(C1OP(=O)(O)O)O)n1cnc2c1ncnc2N)O)O)(C)C)O	1
O95573	ACSL3_HUMAN	6.2.1.3	1569880463	46208|RHEA: 46209,Metrxn:127779,FACOAL200,rxn37339|rxn37334|rxn37329|rxn37325|rxn37323,MNXR128464,HMR_2966|HMR_0283	6.2.1A2(rev)	Eicosanoyl-CoA	1467885719	C02041	CCCCCCCCCCCCCCCCCCCC(=O)SCCNC(=O)CCNC(=O)C(C(COP(=O)(OP(=O)(OCC1OC(C(C1OP(=O)(O)O)O)n1cnc2c1ncnc2N)O)O)(C)C)O	3-Isopropenylpimelyl-CoA	1467975430	C11936				O=C(NCCSC(=O)CCCC(C(=C)C)CC(=O)O)CCNC(=O)C(C(COP(=O)(OP(=O)(OCC1OC(C(C1OP(=O)(O)O)O)n1cnc2c1ncnc2N)O)O)(C)C)O	1
O95573	ACSL3_HUMAN	6.2.1.3	1569818701	33615|RHEA: 33616,Metrxn:127777,OCDCAFATPc|FACOAL180,rxn37341|rxn37338|rxn37333|rxn37328|rxn09449|rxn08454,MNXR102141|MNXR99164,RXN-16380,HMR_2957|HMR_0249	6.2.1A2(rev)	Stearoyl-CoA	1467870680	C00412	CCCCCCCCCCCCCCCCCC(=O)SCCNC(=O)CCNC(=O)C(C(COP(=O)(OP(=O)(OCC1OC(C(C1OP(=O)(O)O)O)n1cnc2c1ncnc2N)O)O)(C)C)O	Pseudoecgonyl-CoA	1467980652	C12450			FDB023909|	O=C(NCCSC(=O)C1C(O)CC2N(C1CC2)C)CCNC(=O)C(C(COP(=O)(OP(=O)(OCC1OC(C(C1OP(=O)(O)O)O)n1cnc2c1ncnc2N)O)O)(C)C)O	1
O95573	ACSL3_HUMAN	6.2.1.3	1569880463	46208|RHEA: 46209,Metrxn:127779,FACOAL200,rxn37339|rxn37334|rxn37329|rxn37325|rxn37323,MNXR128464,HMR_2966|HMR_0283	6.2.1A2(rev)	Eicosanoyl-CoA	1467885719	C02041	CCCCCCCCCCCCCCCCCCCC(=O)SCCNC(=O)CCNC(=O)C(C(COP(=O)(OP(=O)(OCC1OC(C(C1OP(=O)(O)O)O)n1cnc2c1ncnc2N)O)O)(C)C)O	trans-2-Methyl-5-isopropylhexa-2,5-dienoyl-CoA	1467975539	C11945,C11946			FDB023961|	O=C(NCCSC(=O)C(=CCC(=C)C(C)C)C)CCNC(=O)C(C(COP(=O)(OP(=O)(OCC1OC(C(C1OP(=O)(O)O)O)n1cnc2c1ncnc2N)O)O)(C)C)O	1
O95573	ACSL3_HUMAN	6.2.1.3	1569818701	33615|RHEA: 33616,Metrxn:127777,OCDCAFATPc|FACOAL180,rxn37341|rxn37338|rxn37333|rxn37328|rxn09449|rxn08454,MNXR102141|MNXR99164,RXN-16380,HMR_2957|HMR_0249	6.2.1A2(rev)	Stearoyl-CoA	1467870680	C00412	CCCCCCCCCCCCCCCCCC(=O)SCCNC(=O)CCNC(=O)C(C(COP(=O)(OP(=O)(OCC1OC(C(C1OP(=O)(O)O)O)n1cnc2c1ncnc2N)O)O)(C)C)O	Naphthyl-2-methyl-succinyl-CoA	1467987736	C14116				O=C(NCCSC(=O)C(Cc1ccc2c(c1)cccc2)CC(=O)O)CCNC(=O)C(C(COP(=O)(OP(=O)(OCC1OC(C(C1OP(=O)(O)O)O)n1cnc2c1ncnc2N)O)O)(C)C)O	1
O95573	ACSL3_HUMAN	6.2.1.3	1569880463	46208|RHEA: 46209,Metrxn:127779,FACOAL200,rxn37339|rxn37334|rxn37329|rxn37325|rxn37323,MNXR128464,HMR_2966|HMR_0283	6.2.1A2(rev)	Eicosanoyl-CoA	1467885719	C02041	CCCCCCCCCCCCCCCCCCCC(=O)SCCNC(=O)CCNC(=O)C(C(COP(=O)(OP(=O)(OCC1OC(C(C1OP(=O)(O)O)O)n1cnc2c1ncnc2N)O)O)(C)C)O	3-Hydroxy-2,6-dimethyl-5-methylene-heptanoyl-CoA	1467975559	C11947			FDB023380|	O=C(NCCSC(=O)C(C(CC(=C)C(C)C)O)C)CCNC(=O)C(C(COP(=O)(OP(=O)(OCC1OC(C(C1OP(=O)(O)O)O)n1cnc2c1ncnc2N)O)O)(C)C)O	1
O95573	ACSL3_HUMAN	6.2.1.3	1569818701	33615|RHEA: 33616,Metrxn:127777,OCDCAFATPc|FACOAL180,rxn37341|rxn37338|rxn37333|rxn37328|rxn09449|rxn08454,MNXR102141|MNXR99164,RXN-16380,HMR_2957|HMR_0249	6.2.1A2(rev)	Stearoyl-CoA	1467870680	C00412	CCCCCCCCCCCCCCCCCC(=O)SCCNC(=O)CCNC(=O)C(C(COP(=O)(OP(=O)(OCC1OC(C(C1OP(=O)(O)O)O)n1cnc2c1ncnc2N)O)O)(C)C)O	Naphthyl-2-methylene-succinyl-CoA	1467987746	C14117				O=C(NCCSC(=O)C(=Cc1ccc2c(c1)cccc2)CC(=O)O)CCNC(=O)C(C(COP(=O)(OP(=O)(OCC1OC(C(C1OP(=O)(O)O)O)n1cnc2c1ncnc2N)O)O)(C)C)O	1
O95573	ACSL3_HUMAN	6.2.1.3	1569880463	46208|RHEA: 46209,Metrxn:127779,FACOAL200,rxn37339|rxn37334|rxn37329|rxn37325|rxn37323,MNXR128464,HMR_2966|HMR_0283	6.2.1A2(rev)	Eicosanoyl-CoA	1467885719	C02041	CCCCCCCCCCCCCCCCCCCC(=O)SCCNC(=O)CCNC(=O)C(C(COP(=O)(OP(=O)(OCC1OC(C(C1OP(=O)(O)O)O)n1cnc2c1ncnc2N)O)O)(C)C)O	2,6-Dimethyl-5-methylene-3-oxo-heptanoyl-CoA	1467975569	C11948				O=C(NCCSC(=O)C(C(=O)CC(=C)C(C)C)C)CCNC(=O)C(C(COP(=O)(OP(=O)(OCC1OC(C(C1OP(=O)(O)O)O)n1cnc2c1ncnc2N)O)O)(C)C)O	1
O95573	ACSL3_HUMAN	6.2.1.3	1569818701	33615|RHEA: 33616,Metrxn:127777,OCDCAFATPc|FACOAL180,rxn37341|rxn37338|rxn37333|rxn37328|rxn09449|rxn08454,MNXR102141|MNXR99164,RXN-16380,HMR_2957|HMR_0249	6.2.1A2(rev)	Stearoyl-CoA	1467870680	C00412	CCCCCCCCCCCCCCCCCC(=O)SCCNC(=O)CCNC(=O)C(C(COP(=O)(OP(=O)(OCC1OC(C(C1OP(=O)(O)O)O)n1cnc2c1ncnc2N)O)O)(C)C)O	Naphthyl-2-hydroxymethyl-succinyl CoA	1467987755	C14118				O=C(NCCSC(=O)C(C(c1ccc2c(c1)cccc2)O)CC(=O)O)CCNC(=O)C(C(COP(=O)(OP(=O)(OCC1OC(C(C1OP(=O)(O)O)O)n1cnc2c1ncnc2N)O)O)(C)C)O	1
O95573	ACSL3_HUMAN	6.2.1.3	1569880463	46208|RHEA: 46209,Metrxn:127779,FACOAL200,rxn37339|rxn37334|rxn37329|rxn37325|rxn37323,MNXR128464,HMR_2966|HMR_0283	6.2.1A2(rev)	Eicosanoyl-CoA	1467885719	C02041	CCCCCCCCCCCCCCCCCCCC(=O)SCCNC(=O)CCNC(=O)C(C(COP(=O)(OP(=O)(OCC1OC(C(C1OP(=O)(O)O)O)n1cnc2c1ncnc2N)O)O)(C)C)O	3-Isopropylbut-3-enoyl-CoA	1467975579	C11949				O=C(NCCSC(=O)CC(=C)C(C)C)CCNC(=O)C(C(COP(=O)(OP(=O)(OCC1OC(C(C1OP(=O)(O)O)O)n1cnc2c1ncnc2N)O)O)(C)C)O	1
O95573	ACSL3_HUMAN	6.2.1.3	1569818701	33615|RHEA: 33616,Metrxn:127777,OCDCAFATPc|FACOAL180,rxn37341|rxn37338|rxn37333|rxn37328|rxn09449|rxn08454,MNXR102141|MNXR99164,RXN-16380,HMR_2957|HMR_0249	6.2.1A2(rev)	Stearoyl-CoA	1467870680	C00412	CCCCCCCCCCCCCCCCCC(=O)SCCNC(=O)CCNC(=O)C(C(COP(=O)(OP(=O)(OCC1OC(C(C1OP(=O)(O)O)O)n1cnc2c1ncnc2N)O)O)(C)C)O	Naphthyl-2-oxomethyl-succinyl-CoA	1467987764	C14119				O=C(NCCSC(=O)C(C(=O)c1ccc2c(c1)cccc2)CC(=O)O)CCNC(=O)C(C(COP(=O)(OP(=O)(OCC1OC(C(C1OP(=O)(O)O)O)n1cnc2c1ncnc2N)O)O)(C)C)O	1
O95573	ACSL3_HUMAN	6.2.1.3	1569880463	46208|RHEA: 46209,Metrxn:127779,FACOAL200,rxn37339|rxn37334|rxn37329|rxn37325|rxn37323,MNXR128464,HMR_2966|HMR_0283	6.2.1A2(rev)	Eicosanoyl-CoA	1467885719	C02041	CCCCCCCCCCCCCCCCCCCC(=O)SCCNC(=O)CCNC(=O)C(C(COP(=O)(OP(=O)(OCC1OC(C(C1OP(=O)(O)O)O)n1cnc2c1ncnc2N)O)O)(C)C)O	3,5-Dihydroxyphenylacetyl-CoA	1467979373	C12324				O=C(NCCSC(=O)Cc1cc(O)cc(c1)O)CCNC(=O)C(C(COP(=O)(OP(=O)(OCC1OC(C(C1OP(=O)(O)O)O)n1cnc2c1ncnc2N)O)O)(C)C)O	1
O95573	ACSL3_HUMAN	6.2.1.3	1569818701	33615|RHEA: 33616,Metrxn:127777,OCDCAFATPc|FACOAL180,rxn37341|rxn37338|rxn37333|rxn37328|rxn09449|rxn08454,MNXR102141|MNXR99164,RXN-16380,HMR_2957|HMR_0249	6.2.1A2(rev)	Stearoyl-CoA	1467870680	C00412	CCCCCCCCCCCCCCCCCC(=O)SCCNC(=O)CCNC(=O)C(C(COP(=O)(OP(=O)(OCC1OC(C(C1OP(=O)(O)O)O)n1cnc2c1ncnc2N)O)O)(C)C)O	2-Naphthoyl-CoA	1467987773	C14120				O=C(NCCSC(=O)c1ccc2c(c1)cccc2)CCNC(=O)C(C(COP(=O)(OP(=O)(OCC1OC(C(C1OP(=O)(O)O)O)n1cnc2c1ncnc2N)O)O)(C)C)O	1
O95573	ACSL3_HUMAN	6.2.1.3	1569880463	46208|RHEA: 46209,Metrxn:127779,FACOAL200,rxn37339|rxn37334|rxn37329|rxn37325|rxn37323,MNXR128464,HMR_2966|HMR_0283	6.2.1A2(rev)	Eicosanoyl-CoA	1467885719	C02041	CCCCCCCCCCCCCCCCCCCC(=O)SCCNC(=O)CCNC(=O)C(C(COP(=O)(OP(=O)(OCC1OC(C(C1OP(=O)(O)O)O)n1cnc2c1ncnc2N)O)O)(C)C)O	Pseudoecgonyl-CoA	1467980652	C12450			FDB023909|	O=C(NCCSC(=O)C1C(O)CC2N(C1CC2)C)CCNC(=O)C(C(COP(=O)(OP(=O)(OCC1OC(C(C1OP(=O)(O)O)O)n1cnc2c1ncnc2N)O)O)(C)C)O	1
O95573	ACSL3_HUMAN	6.2.1.3	1569818701	33615|RHEA: 33616,Metrxn:127777,OCDCAFATPc|FACOAL180,rxn37341|rxn37338|rxn37333|rxn37328|rxn09449|rxn08454,MNXR102141|MNXR99164,RXN-16380,HMR_2957|HMR_0249	6.2.1A2(rev)	Stearoyl-CoA	1467870680	C00412	CCCCCCCCCCCCCCCCCC(=O)SCCNC(=O)CCNC(=O)C(C(COP(=O)(OP(=O)(OCC1OC(C(C1OP(=O)(O)O)O)n1cnc2c1ncnc2N)O)O)(C)C)O	Adipyl-CoA	1467987962	C14143			FDB023290|	O=C(NCCSC(=O)CCCCC(=O)O)CCNC(=O)C(C(COP(=O)(OP(=O)(OCC1OC(C(C1OP(=O)(O)O)O)n1cnc2c1ncnc2N)O)O)(C)C)O	1
O95573	ACSL3_HUMAN	6.2.1.3	1569880463	46208|RHEA: 46209,Metrxn:127779,FACOAL200,rxn37339|rxn37334|rxn37329|rxn37325|rxn37323,MNXR128464,HMR_2966|HMR_0283	6.2.1A2(rev)	Eicosanoyl-CoA	1467885719	C02041	CCCCCCCCCCCCCCCCCCCC(=O)SCCNC(=O)CCNC(=O)C(C(COP(=O)(OP(=O)(OCC1OC(C(C1OP(=O)(O)O)O)n1cnc2c1ncnc2N)O)O)(C)C)O	Naphthyl-2-methyl-succinyl-CoA	1467987736	C14116				O=C(NCCSC(=O)C(Cc1ccc2c(c1)cccc2)CC(=O)O)CCNC(=O)C(C(COP(=O)(OP(=O)(OCC1OC(C(C1OP(=O)(O)O)O)n1cnc2c1ncnc2N)O)O)(C)C)O	1
O95573	ACSL3_HUMAN	6.2.1.3	1569818701	33615|RHEA: 33616,Metrxn:127777,OCDCAFATPc|FACOAL180,rxn37341|rxn37338|rxn37333|rxn37328|rxn09449|rxn08454,MNXR102141|MNXR99164,RXN-16380,HMR_2957|HMR_0249	6.2.1A2(rev)	Stearoyl-CoA	1467870680	C00412	CCCCCCCCCCCCCCCCCC(=O)SCCNC(=O)CCNC(=O)C(C(COP(=O)(OP(=O)(OCC1OC(C(C1OP(=O)(O)O)O)n1cnc2c1ncnc2N)O)O)(C)C)O	(3S)-3-Hydroxyadipyl-CoA	1467987983	C14145			FDB029085|	OC(CC(=O)SCCNC(=O)CCNC(=O)C(C(COP(=O)(OP(=O)(OCC1OC(C(C1OP(=O)(O)O)O)n1cnc2c1ncnc2N)O)O)(C)C)O)CCC(=O)O	1
O95573	ACSL3_HUMAN	6.2.1.3	1569880463	46208|RHEA: 46209,Metrxn:127779,FACOAL200,rxn37339|rxn37334|rxn37329|rxn37325|rxn37323,MNXR128464,HMR_2966|HMR_0283	6.2.1A2(rev)	Eicosanoyl-CoA	1467885719	C02041	CCCCCCCCCCCCCCCCCCCC(=O)SCCNC(=O)CCNC(=O)C(C(COP(=O)(OP(=O)(OCC1OC(C(C1OP(=O)(O)O)O)n1cnc2c1ncnc2N)O)O)(C)C)O	Naphthyl-2-methylene-succinyl-CoA	1467987746	C14117				O=C(NCCSC(=O)C(=Cc1ccc2c(c1)cccc2)CC(=O)O)CCNC(=O)C(C(COP(=O)(OP(=O)(OCC1OC(C(C1OP(=O)(O)O)O)n1cnc2c1ncnc2N)O)O)(C)C)O	1
O95573	ACSL3_HUMAN	6.2.1.3	1569818701	33615|RHEA: 33616,Metrxn:127777,OCDCAFATPc|FACOAL180,rxn37341|rxn37338|rxn37333|rxn37328|rxn09449|rxn08454,MNXR102141|MNXR99164,RXN-16380,HMR_2957|HMR_0249	6.2.1A2(rev)	Stearoyl-CoA	1467870680	C00412	CCCCCCCCCCCCCCCCCC(=O)SCCNC(=O)CCNC(=O)C(C(COP(=O)(OP(=O)(OCC1OC(C(C1OP(=O)(O)O)O)n1cnc2c1ncnc2N)O)O)(C)C)O	S-2-(Indol-3-yl)acetyl-CoA	1468001838	C15489				O=C(NCCSC(=O)Cc1c[nH]c2c1cccc2)CCNC(=O)C(C(COP(=O)(OP(=O)(OCC1OC(C(C1OP(=O)(O)O)O)n1cnc2c1ncnc2N)O)O)(C)C)O	1
O95573	ACSL3_HUMAN	6.2.1.3	1569880463	46208|RHEA: 46209,Metrxn:127779,FACOAL200,rxn37339|rxn37334|rxn37329|rxn37325|rxn37323,MNXR128464,HMR_2966|HMR_0283	6.2.1A2(rev)	Eicosanoyl-CoA	1467885719	C02041	CCCCCCCCCCCCCCCCCCCC(=O)SCCNC(=O)CCNC(=O)C(C(COP(=O)(OP(=O)(OCC1OC(C(C1OP(=O)(O)O)O)n1cnc2c1ncnc2N)O)O)(C)C)O	Naphthyl-2-hydroxymethyl-succinyl CoA	1467987755	C14118				O=C(NCCSC(=O)C(C(c1ccc2c(c1)cccc2)O)CC(=O)O)CCNC(=O)C(C(COP(=O)(OP(=O)(OCC1OC(C(C1OP(=O)(O)O)O)n1cnc2c1ncnc2N)O)O)(C)C)O	1
O95573	ACSL3_HUMAN	6.2.1.3	1569818701	33615|RHEA: 33616,Metrxn:127777,OCDCAFATPc|FACOAL180,rxn37341|rxn37338|rxn37333|rxn37328|rxn09449|rxn08454,MNXR102141|MNXR99164,RXN-16380,HMR_2957|HMR_0249	6.2.1A2(rev)	Stearoyl-CoA	1467870680	C00412	CCCCCCCCCCCCCCCCCC(=O)SCCNC(=O)CCNC(=O)C(C(COP(=O)(OP(=O)(OCC1OC(C(C1OP(=O)(O)O)O)n1cnc2c1ncnc2N)O)O)(C)C)O	Phenylglyoxylyl-CoA	1468002189	C15524				O=C(NCCSC(=O)C(=O)c1ccccc1)CCNC(=O)C(C(COP(=O)(OP(=O)(OCC1OC(C(C1OP(=O)(O)O)O)n1cnc2c1ncnc2N)O)O)(C)C)O	1
O95573	ACSL3_HUMAN	6.2.1.3	1569880463	46208|RHEA: 46209,Metrxn:127779,FACOAL200,rxn37339|rxn37334|rxn37329|rxn37325|rxn37323,MNXR128464,HMR_2966|HMR_0283	6.2.1A2(rev)	Eicosanoyl-CoA	1467885719	C02041	CCCCCCCCCCCCCCCCCCCC(=O)SCCNC(=O)CCNC(=O)C(C(COP(=O)(OP(=O)(OCC1OC(C(C1OP(=O)(O)O)O)n1cnc2c1ncnc2N)O)O)(C)C)O	Naphthyl-2-oxomethyl-succinyl-CoA	1467987764	C14119				O=C(NCCSC(=O)C(C(=O)c1ccc2c(c1)cccc2)CC(=O)O)CCNC(=O)C(C(COP(=O)(OP(=O)(OCC1OC(C(C1OP(=O)(O)O)O)n1cnc2c1ncnc2N)O)O)(C)C)O	1
O95573	ACSL3_HUMAN	6.2.1.3	1569818701	33615|RHEA: 33616,Metrxn:127777,OCDCAFATPc|FACOAL180,rxn37341|rxn37338|rxn37333|rxn37328|rxn09449|rxn08454,MNXR102141|MNXR99164,RXN-16380,HMR_2957|HMR_0249	6.2.1A2(rev)	Stearoyl-CoA	1467870680	C00412	CCCCCCCCCCCCCCCCCC(=O)SCCNC(=O)CCNC(=O)C(C(COP(=O)(OP(=O)(OCC1OC(C(C1OP(=O)(O)O)O)n1cnc2c1ncnc2N)O)O)(C)C)O	(9Z,12Z,15Z)-Octadecatrienoyl-CoA	1468007758	C16162			FDB023879|	CCC=CCC=CCC=CCCCCCCCC(=O)SCCNC(=O)CCNC(=O)C(C(COP(=O)(OP(=O)(OCC1OC(C(C1OP(=O)(O)O)O)n1cnc2c1ncnc2N)O)O)(C)C)O	1
O95573	ACSL3_HUMAN	6.2.1.3	1569880463	46208|RHEA: 46209,Metrxn:127779,FACOAL200,rxn37339|rxn37334|rxn37329|rxn37325|rxn37323,MNXR128464,HMR_2966|HMR_0283	6.2.1A2(rev)	Eicosanoyl-CoA	1467885719	C02041	CCCCCCCCCCCCCCCCCCCC(=O)SCCNC(=O)CCNC(=O)C(C(COP(=O)(OP(=O)(OCC1OC(C(C1OP(=O)(O)O)O)n1cnc2c1ncnc2N)O)O)(C)C)O	2-Naphthoyl-CoA	1467987773	C14120				O=C(NCCSC(=O)c1ccc2c(c1)cccc2)CCNC(=O)C(C(COP(=O)(OP(=O)(OCC1OC(C(C1OP(=O)(O)O)O)n1cnc2c1ncnc2N)O)O)(C)C)O	1
O95573	ACSL3_HUMAN	6.2.1.3	1569818701	33615|RHEA: 33616,Metrxn:127777,OCDCAFATPc|FACOAL180,rxn37341|rxn37338|rxn37333|rxn37328|rxn09449|rxn08454,MNXR102141|MNXR99164,RXN-16380,HMR_2957|HMR_0249	6.2.1A2(rev)	Stearoyl-CoA	1467870680	C00412	CCCCCCCCCCCCCCCCCC(=O)SCCNC(=O)CCNC(=O)C(C(COP(=O)(OP(=O)(OCC1OC(C(C1OP(=O)(O)O)O)n1cnc2c1ncnc2N)O)O)(C)C)O	(6Z,9Z,12Z,15Z)-Octadecatetraenoyl-CoA	1468007768	C16163			FDB023955|	CCC=CCC=CCC=CCC=CCCCCC(=O)SCCNC(=O)CCNC(=O)C(C(COP(=O)(OP(=O)(OCC1OC(C(C1OP(=O)(O)O)O)n1cnc2c1ncnc2N)O)O)(C)C)O	1
O95573	ACSL3_HUMAN	6.2.1.3	1569880463	46208|RHEA: 46209,Metrxn:127779,FACOAL200,rxn37339|rxn37334|rxn37329|rxn37325|rxn37323,MNXR128464,HMR_2966|HMR_0283	6.2.1A2(rev)	Eicosanoyl-CoA	1467885719	C02041	CCCCCCCCCCCCCCCCCCCC(=O)SCCNC(=O)CCNC(=O)C(C(COP(=O)(OP(=O)(OCC1OC(C(C1OP(=O)(O)O)O)n1cnc2c1ncnc2N)O)O)(C)C)O	Adipyl-CoA	1467987962	C14143			FDB023290|	O=C(NCCSC(=O)CCCCC(=O)O)CCNC(=O)C(C(COP(=O)(OP(=O)(OCC1OC(C(C1OP(=O)(O)O)O)n1cnc2c1ncnc2N)O)O)(C)C)O	1
O95573	ACSL3_HUMAN	6.2.1.3	1569818701	33615|RHEA: 33616,Metrxn:127777,OCDCAFATPc|FACOAL180,rxn37341|rxn37338|rxn37333|rxn37328|rxn09449|rxn08454,MNXR102141|MNXR99164,RXN-16380,HMR_2957|HMR_0249	6.2.1A2(rev)	Stearoyl-CoA	1467870680	C00412	CCCCCCCCCCCCCCCCCC(=O)SCCNC(=O)CCNC(=O)C(C(COP(=O)(OP(=O)(OCC1OC(C(C1OP(=O)(O)O)O)n1cnc2c1ncnc2N)O)O)(C)C)O	(5Z,8Z,11Z,14Z,17Z)-Icosapentaenoyl-CoA	1468007787	C16165			FDB023953|	CCC=CCC=CCC=CCC=CCC=CCCCC(=O)SCCNC(=O)CCNC(=O)C(C(COP(=O)(OP(=O)(OCC1OC(C(C1OP(=O)(O)O)O)n1cnc2c1ncnc2N)O)O)(C)C)O	1
O95573	ACSL3_HUMAN	6.2.1.3	1569880463	46208|RHEA: 46209,Metrxn:127779,FACOAL200,rxn37339|rxn37334|rxn37329|rxn37325|rxn37323,MNXR128464,HMR_2966|HMR_0283	6.2.1A2(rev)	Eicosanoyl-CoA	1467885719	C02041	CCCCCCCCCCCCCCCCCCCC(=O)SCCNC(=O)CCNC(=O)C(C(COP(=O)(OP(=O)(OCC1OC(C(C1OP(=O)(O)O)O)n1cnc2c1ncnc2N)O)O)(C)C)O	(3S)-3-Hydroxyadipyl-CoA	1467987983	C14145			FDB029085|	OC(CC(=O)SCCNC(=O)CCNC(=O)C(C(COP(=O)(OP(=O)(OCC1OC(C(C1OP(=O)(O)O)O)n1cnc2c1ncnc2N)O)O)(C)C)O)CCC(=O)O	1
O95573	ACSL3_HUMAN	6.2.1.3	1569818701	33615|RHEA: 33616,Metrxn:127777,OCDCAFATPc|FACOAL180,rxn37341|rxn37338|rxn37333|rxn37328|rxn09449|rxn08454,MNXR102141|MNXR99164,RXN-16380,HMR_2957|HMR_0249	6.2.1A2(rev)	Stearoyl-CoA	1467870680	C00412	CCCCCCCCCCCCCCCCCC(=O)SCCNC(=O)CCNC(=O)C(C(COP(=O)(OP(=O)(OCC1OC(C(C1OP(=O)(O)O)O)n1cnc2c1ncnc2N)O)O)(C)C)O	(7Z,10Z,13Z,16Z,19Z)-Docosapentaenoyl-CoA	1468007797	C16166			FDB023866|	CCC=CCC=CCC=CCC=CCC=CCCCCCC(=O)SCCNC(=O)CCNC(=O)C(C(COP(=O)(OP(=O)(OCC1OC(C(C1OP(=O)(O)O)O)n1cnc2c1ncnc2N)O)O)(C)C)O	1
O95573	ACSL3_HUMAN	6.2.1.3	1569880463	46208|RHEA: 46209,Metrxn:127779,FACOAL200,rxn37339|rxn37334|rxn37329|rxn37325|rxn37323,MNXR128464,HMR_2966|HMR_0283	6.2.1A2(rev)	Eicosanoyl-CoA	1467885719	C02041	CCCCCCCCCCCCCCCCCCCC(=O)SCCNC(=O)CCNC(=O)C(C(COP(=O)(OP(=O)(OCC1OC(C(C1OP(=O)(O)O)O)n1cnc2c1ncnc2N)O)O)(C)C)O	S-2-(Indol-3-yl)acetyl-CoA	1468001838	C15489				O=C(NCCSC(=O)Cc1c[nH]c2c1cccc2)CCNC(=O)C(C(COP(=O)(OP(=O)(OCC1OC(C(C1OP(=O)(O)O)O)n1cnc2c1ncnc2N)O)O)(C)C)O	1
O95573	ACSL3_HUMAN	6.2.1.3	1569818701	33615|RHEA: 33616,Metrxn:127777,OCDCAFATPc|FACOAL180,rxn37341|rxn37338|rxn37333|rxn37328|rxn09449|rxn08454,MNXR102141|MNXR99164,RXN-16380,HMR_2957|HMR_0249	6.2.1A2(rev)	Stearoyl-CoA	1467870680	C00412	CCCCCCCCCCCCCCCCCC(=O)SCCNC(=O)CCNC(=O)C(C(COP(=O)(OP(=O)(OCC1OC(C(C1OP(=O)(O)O)O)n1cnc2c1ncnc2N)O)O)(C)C)O	(6Z,9Z,12Z,15Z,18Z,21Z)-Tetracosahexaenoyl-CoA	1468007815	C16168			FDB023856|	CCC=CCC=CCC=CCC=CCC=CCC=CCCCCC(=O)SCCNC(=O)CCNC(=O)C(C(COP(=O)(OP(=O)(OCC1OC(C(C1OP(=O)(O)O)O)n1cnc2c1ncnc2N)O)O)(C)C)O	1
O95573	ACSL3_HUMAN	6.2.1.3	1569880463	46208|RHEA: 46209,Metrxn:127779,FACOAL200,rxn37339|rxn37334|rxn37329|rxn37325|rxn37323,MNXR128464,HMR_2966|HMR_0283	6.2.1A2(rev)	Eicosanoyl-CoA	1467885719	C02041	CCCCCCCCCCCCCCCCCCCC(=O)SCCNC(=O)CCNC(=O)C(C(COP(=O)(OP(=O)(OCC1OC(C(C1OP(=O)(O)O)O)n1cnc2c1ncnc2N)O)O)(C)C)O	Phenylglyoxylyl-CoA	1468002189	C15524				O=C(NCCSC(=O)C(=O)c1ccccc1)CCNC(=O)C(C(COP(=O)(OP(=O)(OCC1OC(C(C1OP(=O)(O)O)O)n1cnc2c1ncnc2N)O)O)(C)C)O	1
O95573	ACSL3_HUMAN	6.2.1.3	1569818701	33615|RHEA: 33616,Metrxn:127777,OCDCAFATPc|FACOAL180,rxn37341|rxn37338|rxn37333|rxn37328|rxn09449|rxn08454,MNXR102141|MNXR99164,RXN-16380,HMR_2957|HMR_0249	6.2.1A2(rev)	Stearoyl-CoA	1467870680	C00412	CCCCCCCCCCCCCCCCCC(=O)SCCNC(=O)CCNC(=O)C(C(COP(=O)(OP(=O)(OCC1OC(C(C1OP(=O)(O)O)O)n1cnc2c1ncnc2N)O)O)(C)C)O	(7Z,10Z,13Z,16Z)-Docosatetraenoyl-CoA	1468007833	C16170				CCCCCC=CCC=CCC=CCC=CCCCCCC(=O)SCCNC(=O)CCNC(=O)C(C(COP(=O)(OP(=O)(OCC1OC(C(C1OP(=O)(O)O)O)n1cnc2c1ncnc2N)O)O)(C)C)O	1
O95573	ACSL3_HUMAN	6.2.1.3	1569880463	46208|RHEA: 46209,Metrxn:127779,FACOAL200,rxn37339|rxn37334|rxn37329|rxn37325|rxn37323,MNXR128464,HMR_2966|HMR_0283	6.2.1A2(rev)	Eicosanoyl-CoA	1467885719	C02041	CCCCCCCCCCCCCCCCCCCC(=O)SCCNC(=O)CCNC(=O)C(C(COP(=O)(OP(=O)(OCC1OC(C(C1OP(=O)(O)O)O)n1cnc2c1ncnc2N)O)O)(C)C)O	(9Z,12Z,15Z)-Octadecatrienoyl-CoA	1468007758	C16162			FDB023879|	CCC=CCC=CCC=CCCCCCCCC(=O)SCCNC(=O)CCNC(=O)C(C(COP(=O)(OP(=O)(OCC1OC(C(C1OP(=O)(O)O)O)n1cnc2c1ncnc2N)O)O)(C)C)O	1
O95573	ACSL3_HUMAN	6.2.1.3	1569818701	33615|RHEA: 33616,Metrxn:127777,OCDCAFATPc|FACOAL180,rxn37341|rxn37338|rxn37333|rxn37328|rxn09449|rxn08454,MNXR102141|MNXR99164,RXN-16380,HMR_2957|HMR_0249	6.2.1A2(rev)	Stearoyl-CoA	1467870680	C00412	CCCCCCCCCCCCCCCCCC(=O)SCCNC(=O)CCNC(=O)C(C(COP(=O)(OP(=O)(OCC1OC(C(C1OP(=O)(O)O)O)n1cnc2c1ncnc2N)O)O)(C)C)O	(9Z,12Z,15Z,18Z)-Tetracosatetraenoyl-CoA	1468007841	C16171			FDB023954|	CCCCCC=CCC=CCC=CCC=CCCCCCCCC(=O)SCCNC(=O)CCNC(=O)C(C(COP(=O)(OP(=O)(OCC1OC(C(C1OP(=O)(O)O)O)n1cnc2c1ncnc2N)O)O)(C)C)O	1
O95573	ACSL3_HUMAN	6.2.1.3	1569880463	46208|RHEA: 46209,Metrxn:127779,FACOAL200,rxn37339|rxn37334|rxn37329|rxn37325|rxn37323,MNXR128464,HMR_2966|HMR_0283	6.2.1A2(rev)	Eicosanoyl-CoA	1467885719	C02041	CCCCCCCCCCCCCCCCCCCC(=O)SCCNC(=O)CCNC(=O)C(C(COP(=O)(OP(=O)(OCC1OC(C(C1OP(=O)(O)O)O)n1cnc2c1ncnc2N)O)O)(C)C)O	(6Z,9Z,12Z,15Z)-Octadecatetraenoyl-CoA	1468007768	C16163			FDB023955|	CCC=CCC=CCC=CCC=CCCCCC(=O)SCCNC(=O)CCNC(=O)C(C(COP(=O)(OP(=O)(OCC1OC(C(C1OP(=O)(O)O)O)n1cnc2c1ncnc2N)O)O)(C)C)O	1
O95573	ACSL3_HUMAN	6.2.1.3	1569818701	33615|RHEA: 33616,Metrxn:127777,OCDCAFATPc|FACOAL180,rxn37341|rxn37338|rxn37333|rxn37328|rxn09449|rxn08454,MNXR102141|MNXR99164,RXN-16380,HMR_2957|HMR_0249	6.2.1A2(rev)	Stearoyl-CoA	1467870680	C00412	CCCCCCCCCCCCCCCCCC(=O)SCCNC(=O)CCNC(=O)C(C(COP(=O)(OP(=O)(OCC1OC(C(C1OP(=O)(O)O)O)n1cnc2c1ncnc2N)O)O)(C)C)O	(4Z,7Z,10Z,13Z,16Z)-Docosapentaenoyl-CoA	1468007859	C16173			FDB023952|	CCCCCC=CCC=CCC=CCC=CCC=CCCC(=O)SCCNC(=O)CCNC(=O)C(C(COP(=O)(OP(=O)(OCC1OC(C(C1OP(=O)(O)O)O)n1cnc2c1ncnc2N)O)O)(C)C)O	1
O95573	ACSL3_HUMAN	6.2.1.3	1569880463	46208|RHEA: 46209,Metrxn:127779,FACOAL200,rxn37339|rxn37334|rxn37329|rxn37325|rxn37323,MNXR128464,HMR_2966|HMR_0283	6.2.1A2(rev)	Eicosanoyl-CoA	1467885719	C02041	CCCCCCCCCCCCCCCCCCCC(=O)SCCNC(=O)CCNC(=O)C(C(COP(=O)(OP(=O)(OCC1OC(C(C1OP(=O)(O)O)O)n1cnc2c1ncnc2N)O)O)(C)C)O	(5Z,8Z,11Z,14Z,17Z)-Icosapentaenoyl-CoA	1468007787	C16165			FDB023953|	CCC=CCC=CCC=CCC=CCC=CCCCC(=O)SCCNC(=O)CCNC(=O)C(C(COP(=O)(OP(=O)(OCC1OC(C(C1OP(=O)(O)O)O)n1cnc2c1ncnc2N)O)O)(C)C)O	1
O95573	ACSL3_HUMAN	6.2.1.3	1569818701	33615|RHEA: 33616,Metrxn:127777,OCDCAFATPc|FACOAL180,rxn37341|rxn37338|rxn37333|rxn37328|rxn09449|rxn08454,MNXR102141|MNXR99164,RXN-16380,HMR_2957|HMR_0249	6.2.1A2(rev)	Stearoyl-CoA	1467870680	C00412	CCCCCCCCCCCCCCCCCC(=O)SCCNC(=O)CCNC(=O)C(C(COP(=O)(OP(=O)(OCC1OC(C(C1OP(=O)(O)O)O)n1cnc2c1ncnc2N)O)O)(C)C)O	(11Z,14Z,17Z)-Icosatrienoyl-CoA	1468007899	C16179				CCC=CCC=CCC=CCCCCCCCCCC(=O)SCCNC(=O)CCNC(=O)C(C(COP(=O)(OP(=O)(OCC1OC(C(C1OP(=O)(O)O)O)n1cnc2c1ncnc2N)O)O)(C)C)O	1
O95573	ACSL3_HUMAN	6.2.1.3	1569880463	46208|RHEA: 46209,Metrxn:127779,FACOAL200,rxn37339|rxn37334|rxn37329|rxn37325|rxn37323,MNXR128464,HMR_2966|HMR_0283	6.2.1A2(rev)	Eicosanoyl-CoA	1467885719	C02041	CCCCCCCCCCCCCCCCCCCC(=O)SCCNC(=O)CCNC(=O)C(C(COP(=O)(OP(=O)(OCC1OC(C(C1OP(=O)(O)O)O)n1cnc2c1ncnc2N)O)O)(C)C)O	(7Z,10Z,13Z,16Z,19Z)-Docosapentaenoyl-CoA	1468007797	C16166			FDB023866|	CCC=CCC=CCC=CCC=CCC=CCCCCCC(=O)SCCNC(=O)CCNC(=O)C(C(COP(=O)(OP(=O)(OCC1OC(C(C1OP(=O)(O)O)O)n1cnc2c1ncnc2N)O)O)(C)C)O	1
O95573	ACSL3_HUMAN	6.2.1.3	1569818701	33615|RHEA: 33616,Metrxn:127777,OCDCAFATPc|FACOAL180,rxn37341|rxn37338|rxn37333|rxn37328|rxn09449|rxn08454,MNXR102141|MNXR99164,RXN-16380,HMR_2957|HMR_0249	6.2.1A2(rev)	Stearoyl-CoA	1467870680	C00412	CCCCCCCCCCCCCCCCCC(=O)SCCNC(=O)CCNC(=O)C(C(COP(=O)(OP(=O)(OCC1OC(C(C1OP(=O)(O)O)O)n1cnc2c1ncnc2N)O)O)(C)C)O	3-Hydroxyoctadecanoyl-CoA	1468008271	C16217			FDB029169|	CCCCCCCCCCCCCCCC(CC(=O)SCCNC(=O)CCNC(=O)C(C(COP(=O)(OP(=O)(OCC1OC(C(C1OP(=O)(O)O)O)n1cnc2c1ncnc2N)O)O)(C)C)O)O	1
O95573	ACSL3_HUMAN	6.2.1.3	1569880463	46208|RHEA: 46209,Metrxn:127779,FACOAL200,rxn37339|rxn37334|rxn37329|rxn37325|rxn37323,MNXR128464,HMR_2966|HMR_0283	6.2.1A2(rev)	Eicosanoyl-CoA	1467885719	C02041	CCCCCCCCCCCCCCCCCCCC(=O)SCCNC(=O)CCNC(=O)C(C(COP(=O)(OP(=O)(OCC1OC(C(C1OP(=O)(O)O)O)n1cnc2c1ncnc2N)O)O)(C)C)O	(6Z,9Z,12Z,15Z,18Z,21Z)-Tetracosahexaenoyl-CoA	1468007815	C16168			FDB023856|	CCC=CCC=CCC=CCC=CCC=CCC=CCCCCC(=O)SCCNC(=O)CCNC(=O)C(C(COP(=O)(OP(=O)(OCC1OC(C(C1OP(=O)(O)O)O)n1cnc2c1ncnc2N)O)O)(C)C)O	1
O95573	ACSL3_HUMAN	6.2.1.3	1569818701	33615|RHEA: 33616,Metrxn:127777,OCDCAFATPc|FACOAL180,rxn37341|rxn37338|rxn37333|rxn37328|rxn09449|rxn08454,MNXR102141|MNXR99164,RXN-16380,HMR_2957|HMR_0249	6.2.1A2(rev)	Stearoyl-CoA	1467870680	C00412	CCCCCCCCCCCCCCCCCC(=O)SCCNC(=O)CCNC(=O)C(C(COP(=O)(OP(=O)(OCC1OC(C(C1OP(=O)(O)O)O)n1cnc2c1ncnc2N)O)O)(C)C)O	(R)-Phenyllactyl-CoA	1468008662	C16257				O=C(NCCSC(=O)C(Cc1ccccc1)O)CCNC(=O)C(C(COP(=O)(OP(=O)(OCC1OC(C(C1OP(=O)(O)O)O)n1cnc2c1ncnc2N)O)O)(C)C)O	1
O95573	ACSL3_HUMAN	6.2.1.3	1569880463	46208|RHEA: 46209,Metrxn:127779,FACOAL200,rxn37339|rxn37334|rxn37329|rxn37325|rxn37323,MNXR128464,HMR_2966|HMR_0283	6.2.1A2(rev)	Eicosanoyl-CoA	1467885719	C02041	CCCCCCCCCCCCCCCCCCCC(=O)SCCNC(=O)CCNC(=O)C(C(COP(=O)(OP(=O)(OCC1OC(C(C1OP(=O)(O)O)O)n1cnc2c1ncnc2N)O)O)(C)C)O	(7Z,10Z,13Z,16Z)-Docosatetraenoyl-CoA	1468007833	C16170				CCCCCC=CCC=CCC=CCC=CCCCCCC(=O)SCCNC(=O)CCNC(=O)C(C(COP(=O)(OP(=O)(OCC1OC(C(C1OP(=O)(O)O)O)n1cnc2c1ncnc2N)O)O)(C)C)O	1
O95573	ACSL3_HUMAN	6.2.1.3	1569818701	33615|RHEA: 33616,Metrxn:127777,OCDCAFATPc|FACOAL180,rxn37341|rxn37338|rxn37333|rxn37328|rxn09449|rxn08454,MNXR102141|MNXR99164,RXN-16380,HMR_2957|HMR_0249	6.2.1A2(rev)	Stearoyl-CoA	1467870680	C00412	CCCCCCCCCCCCCCCCCC(=O)SCCNC(=O)CCNC(=O)C(C(COP(=O)(OP(=O)(OCC1OC(C(C1OP(=O)(O)O)O)n1cnc2c1ncnc2N)O)O)(C)C)O	Cyclopropanecarboxyl-CoA	1468008773	C16268				O=C(NCCSC(=O)C1CC1)CCNC(=O)C(C(COP(=O)(OP(=O)(OCC1OC(C(C1OP(=O)(O)O)O)n1cnc2c1ncnc2N)O)O)(C)C)O	1
O95573	ACSL3_HUMAN	6.2.1.3	1569880463	46208|RHEA: 46209,Metrxn:127779,FACOAL200,rxn37339|rxn37334|rxn37329|rxn37325|rxn37323,MNXR128464,HMR_2966|HMR_0283	6.2.1A2(rev)	Eicosanoyl-CoA	1467885719	C02041	CCCCCCCCCCCCCCCCCCCC(=O)SCCNC(=O)CCNC(=O)C(C(COP(=O)(OP(=O)(OCC1OC(C(C1OP(=O)(O)O)O)n1cnc2c1ncnc2N)O)O)(C)C)O	(9Z,12Z,15Z,18Z)-Tetracosatetraenoyl-CoA	1468007841	C16171			FDB023954|	CCCCCC=CCC=CCC=CCC=CCCCCCCCC(=O)SCCNC(=O)CCNC(=O)C(C(COP(=O)(OP(=O)(OCC1OC(C(C1OP(=O)(O)O)O)n1cnc2c1ncnc2N)O)O)(C)C)O	1
O95573	ACSL3_HUMAN	6.2.1.3	1569818701	33615|RHEA: 33616,Metrxn:127777,OCDCAFATPc|FACOAL180,rxn37341|rxn37338|rxn37333|rxn37328|rxn09449|rxn08454,MNXR102141|MNXR99164,RXN-16380,HMR_2957|HMR_0249	6.2.1A2(rev)	Stearoyl-CoA	1467870680	C00412	CCCCCCCCCCCCCCCCCC(=O)SCCNC(=O)CCNC(=O)C(C(COP(=O)(OP(=O)(OCC1OC(C(C1OP(=O)(O)O)O)n1cnc2c1ncnc2N)O)O)(C)C)O	3-Hydroxy-5-oxohexanoyl-CoA	1468008821	C16273				OC(CC(=O)SCCNC(=O)CCNC(=O)C(C(COP(=O)(OP(=O)(OCC1OC(C(C1OP(=O)(O)O)O)n1cnc2c1ncnc2N)O)O)(C)C)O)CC(=O)C	1
O95573	ACSL3_HUMAN	6.2.1.3	1569880463	46208|RHEA: 46209,Metrxn:127779,FACOAL200,rxn37339|rxn37334|rxn37329|rxn37325|rxn37323,MNXR128464,HMR_2966|HMR_0283	6.2.1A2(rev)	Eicosanoyl-CoA	1467885719	C02041	CCCCCCCCCCCCCCCCCCCC(=O)SCCNC(=O)CCNC(=O)C(C(COP(=O)(OP(=O)(OCC1OC(C(C1OP(=O)(O)O)O)n1cnc2c1ncnc2N)O)O)(C)C)O	(4Z,7Z,10Z,13Z,16Z)-Docosapentaenoyl-CoA	1468007859	C16173			FDB023952|	CCCCCC=CCC=CCC=CCC=CCC=CCCC(=O)SCCNC(=O)CCNC(=O)C(C(COP(=O)(OP(=O)(OCC1OC(C(C1OP(=O)(O)O)O)n1cnc2c1ncnc2N)O)O)(C)C)O	1
O95573	ACSL3_HUMAN	6.2.1.3	1569818701	33615|RHEA: 33616,Metrxn:127777,OCDCAFATPc|FACOAL180,rxn37341|rxn37338|rxn37333|rxn37328|rxn09449|rxn08454,MNXR102141|MNXR99164,RXN-16380,HMR_2957|HMR_0249	6.2.1A2(rev)	Stearoyl-CoA	1467870680	C00412	CCCCCCCCCCCCCCCCCC(=O)SCCNC(=O)CCNC(=O)C(C(COP(=O)(OP(=O)(OCC1OC(C(C1OP(=O)(O)O)O)n1cnc2c1ncnc2N)O)O)(C)C)O	OPC8-CoA	1468009378	C16327			FDB027897|	CCC=CCC1C(CCCCCCCC(=O)SCCNC(=O)CCNC(=O)C(C(COP(=O)(OP(=O)(OCC2OC(C(C2OP(=O)(O)O)O)n2cnc3c2ncnc3N)O)O)(C)C)O)CCC1=O	1
O95573	ACSL3_HUMAN	6.2.1.3	1569880463	46208|RHEA: 46209,Metrxn:127779,FACOAL200,rxn37339|rxn37334|rxn37329|rxn37325|rxn37323,MNXR128464,HMR_2966|HMR_0283	6.2.1A2(rev)	Eicosanoyl-CoA	1467885719	C02041	CCCCCCCCCCCCCCCCCCCC(=O)SCCNC(=O)CCNC(=O)C(C(COP(=O)(OP(=O)(OCC1OC(C(C1OP(=O)(O)O)O)n1cnc2c1ncnc2N)O)O)(C)C)O	(11Z,14Z,17Z)-Icosatrienoyl-CoA	1468007899	C16179				CCC=CCC=CCC=CCCCCCCCCCC(=O)SCCNC(=O)CCNC(=O)C(C(COP(=O)(OP(=O)(OCC1OC(C(C1OP(=O)(O)O)O)n1cnc2c1ncnc2N)O)O)(C)C)O	1
O95573	ACSL3_HUMAN	6.2.1.3	1569818701	33615|RHEA: 33616,Metrxn:127777,OCDCAFATPc|FACOAL180,rxn37341|rxn37338|rxn37333|rxn37328|rxn09449|rxn08454,MNXR102141|MNXR99164,RXN-16380,HMR_2957|HMR_0249	6.2.1A2(rev)	Stearoyl-CoA	1467870680	C00412	CCCCCCCCCCCCCCCCCC(=O)SCCNC(=O)CCNC(=O)C(C(COP(=O)(OP(=O)(OCC1OC(C(C1OP(=O)(O)O)O)n1cnc2c1ncnc2N)O)O)(C)C)O	trans-2-Enoyl-OPC8-CoA	1468009387	C16328			FDB027904|	CCC=CCC1C(CCCCCC=CC(=O)SCCNC(=O)CCNC(=O)C(C(COP(=O)(OP(=O)(OCC2OC(C(C2OP(=O)(O)O)O)n2cnc3c2ncnc3N)O)O)(C)C)O)CCC1=O	1
O95573	ACSL3_HUMAN	6.2.1.3	1569880463	46208|RHEA: 46209,Metrxn:127779,FACOAL200,rxn37339|rxn37334|rxn37329|rxn37325|rxn37323,MNXR128464,HMR_2966|HMR_0283	6.2.1A2(rev)	Eicosanoyl-CoA	1467885719	C02041	CCCCCCCCCCCCCCCCCCCC(=O)SCCNC(=O)CCNC(=O)C(C(COP(=O)(OP(=O)(OCC1OC(C(C1OP(=O)(O)O)O)n1cnc2c1ncnc2N)O)O)(C)C)O	3-Hydroxyoctadecanoyl-CoA	1468008271	C16217			FDB029169|	CCCCCCCCCCCCCCCC(CC(=O)SCCNC(=O)CCNC(=O)C(C(COP(=O)(OP(=O)(OCC1OC(C(C1OP(=O)(O)O)O)n1cnc2c1ncnc2N)O)O)(C)C)O)O	1
O95573	ACSL3_HUMAN	6.2.1.3	1569818701	33615|RHEA: 33616,Metrxn:127777,OCDCAFATPc|FACOAL180,rxn37341|rxn37338|rxn37333|rxn37328|rxn09449|rxn08454,MNXR102141|MNXR99164,RXN-16380,HMR_2957|HMR_0249	6.2.1A2(rev)	Stearoyl-CoA	1467870680	C00412	CCCCCCCCCCCCCCCCCC(=O)SCCNC(=O)CCNC(=O)C(C(COP(=O)(OP(=O)(OCC1OC(C(C1OP(=O)(O)O)O)n1cnc2c1ncnc2N)O)O)(C)C)O	3-Hydroxy-OPC8-CoA	1468009396	C16329				CCC=CCC1C(CCCCCC(CC(=O)SCCNC(=O)CCNC(=O)C(C(COP(=O)(OP(=O)(OCC2OC(C(C2OP(=O)(O)O)O)n2cnc3c2ncnc3N)O)O)(C)C)O)O)CCC1=O	1
O95573	ACSL3_HUMAN	6.2.1.3	1569880463	46208|RHEA: 46209,Metrxn:127779,FACOAL200,rxn37339|rxn37334|rxn37329|rxn37325|rxn37323,MNXR128464,HMR_2966|HMR_0283	6.2.1A2(rev)	Eicosanoyl-CoA	1467885719	C02041	CCCCCCCCCCCCCCCCCCCC(=O)SCCNC(=O)CCNC(=O)C(C(COP(=O)(OP(=O)(OCC1OC(C(C1OP(=O)(O)O)O)n1cnc2c1ncnc2N)O)O)(C)C)O	(R)-Phenyllactyl-CoA	1468008662	C16257				O=C(NCCSC(=O)C(Cc1ccccc1)O)CCNC(=O)C(C(COP(=O)(OP(=O)(OCC1OC(C(C1OP(=O)(O)O)O)n1cnc2c1ncnc2N)O)O)(C)C)O	1
O95573	ACSL3_HUMAN	6.2.1.3	1569818701	33615|RHEA: 33616,Metrxn:127777,OCDCAFATPc|FACOAL180,rxn37341|rxn37338|rxn37333|rxn37328|rxn09449|rxn08454,MNXR102141|MNXR99164,RXN-16380,HMR_2957|HMR_0249	6.2.1A2(rev)	Stearoyl-CoA	1467870680	C00412	CCCCCCCCCCCCCCCCCC(=O)SCCNC(=O)CCNC(=O)C(C(COP(=O)(OP(=O)(OCC1OC(C(C1OP(=O)(O)O)O)n1cnc2c1ncnc2N)O)O)(C)C)O	OPC6-CoA	1468009414	C16331			FDB027896|	CCC=CCC1C(CCCCCC(=O)SCCNC(=O)CCNC(=O)C(C(COP(=O)(OP(=O)(OCC2OC(C(C2OP(=O)(O)O)O)n2cnc3c2ncnc3N)O)O)(C)C)O)CCC1=O	1
O95573	ACSL3_HUMAN	6.2.1.3	1569880463	46208|RHEA: 46209,Metrxn:127779,FACOAL200,rxn37339|rxn37334|rxn37329|rxn37325|rxn37323,MNXR128464,HMR_2966|HMR_0283	6.2.1A2(rev)	Eicosanoyl-CoA	1467885719	C02041	CCCCCCCCCCCCCCCCCCCC(=O)SCCNC(=O)CCNC(=O)C(C(COP(=O)(OP(=O)(OCC1OC(C(C1OP(=O)(O)O)O)n1cnc2c1ncnc2N)O)O)(C)C)O	Cyclopropanecarboxyl-CoA	1468008773	C16268				O=C(NCCSC(=O)C1CC1)CCNC(=O)C(C(COP(=O)(OP(=O)(OCC1OC(C(C1OP(=O)(O)O)O)n1cnc2c1ncnc2N)O)O)(C)C)O	1
O95573	ACSL3_HUMAN	6.2.1.3	1569880463	46208|RHEA: 46209,Metrxn:127779,FACOAL200,rxn37339|rxn37334|rxn37329|rxn37325|rxn37323,MNXR128464,HMR_2966|HMR_0283	6.2.1A2(rev)	Eicosanoyl-CoA	1467885719	C02041	CCCCCCCCCCCCCCCCCCCC(=O)SCCNC(=O)CCNC(=O)C(C(COP(=O)(OP(=O)(OCC1OC(C(C1OP(=O)(O)O)O)n1cnc2c1ncnc2N)O)O)(C)C)O	3-Hydroxy-5-oxohexanoyl-CoA	1468008821	C16273				OC(CC(=O)SCCNC(=O)CCNC(=O)C(C(COP(=O)(OP(=O)(OCC1OC(C(C1OP(=O)(O)O)O)n1cnc2c1ncnc2N)O)O)(C)C)O)CC(=O)C	1
O95573	ACSL3_HUMAN	6.2.1.3	1569818701	33615|RHEA: 33616,Metrxn:127777,OCDCAFATPc|FACOAL180,rxn37341|rxn37338|rxn37333|rxn37328|rxn09449|rxn08454,MNXR102141|MNXR99164,RXN-16380,HMR_2957|HMR_0249	6.2.1A2(rev)	Stearoyl-CoA	1467870680	C00412	CCCCCCCCCCCCCCCCCC(=O)SCCNC(=O)CCNC(=O)C(C(COP(=O)(OP(=O)(OCC1OC(C(C1OP(=O)(O)O)O)n1cnc2c1ncnc2N)O)O)(C)C)O	trans-2-Enoyl-OPC6-CoA	1468009423	C16332			FDB027903|	CCC=CCC1C(CCCC=CC(=O)SCCNC(=O)CCNC(=O)C(C(COP(=O)(OP(=O)(OCC2OC(C(C2OP(=O)(O)O)O)n2cnc3c2ncnc3N)O)O)(C)C)O)CCC1=O	1
O95573	ACSL3_HUMAN	6.2.1.3	1569880463	46208|RHEA: 46209,Metrxn:127779,FACOAL200,rxn37339|rxn37334|rxn37329|rxn37325|rxn37323,MNXR128464,HMR_2966|HMR_0283	6.2.1A2(rev)	Eicosanoyl-CoA	1467885719	C02041	CCCCCCCCCCCCCCCCCCCC(=O)SCCNC(=O)CCNC(=O)C(C(COP(=O)(OP(=O)(OCC1OC(C(C1OP(=O)(O)O)O)n1cnc2c1ncnc2N)O)O)(C)C)O	OPC8-CoA	1468009378	C16327			FDB027897|	CCC=CCC1C(CCCCCCCC(=O)SCCNC(=O)CCNC(=O)C(C(COP(=O)(OP(=O)(OCC2OC(C(C2OP(=O)(O)O)O)n2cnc3c2ncnc3N)O)O)(C)C)O)CCC1=O	1
O95573	ACSL3_HUMAN	6.2.1.3	1569818701	33615|RHEA: 33616,Metrxn:127777,OCDCAFATPc|FACOAL180,rxn37341|rxn37338|rxn37333|rxn37328|rxn09449|rxn08454,MNXR102141|MNXR99164,RXN-16380,HMR_2957|HMR_0249	6.2.1A2(rev)	Stearoyl-CoA	1467870680	C00412	CCCCCCCCCCCCCCCCCC(=O)SCCNC(=O)CCNC(=O)C(C(COP(=O)(OP(=O)(OCC1OC(C(C1OP(=O)(O)O)O)n1cnc2c1ncnc2N)O)O)(C)C)O	3-Hydroxy-OPC6-CoA	1468009432	C16333				CCC=CCC1C(CCCC(CC(=O)SCCNC(=O)CCNC(=O)C(C(COP(=O)(OP(=O)(OCC2OC(C(C2OP(=O)(O)O)O)n2cnc3c2ncnc3N)O)O)(C)C)O)O)CCC1=O	1
O95573	ACSL3_HUMAN	6.2.1.3	1569880463	46208|RHEA: 46209,Metrxn:127779,FACOAL200,rxn37339|rxn37334|rxn37329|rxn37325|rxn37323,MNXR128464,HMR_2966|HMR_0283	6.2.1A2(rev)	Eicosanoyl-CoA	1467885719	C02041	CCCCCCCCCCCCCCCCCCCC(=O)SCCNC(=O)CCNC(=O)C(C(COP(=O)(OP(=O)(OCC1OC(C(C1OP(=O)(O)O)O)n1cnc2c1ncnc2N)O)O)(C)C)O	trans-2-Enoyl-OPC8-CoA	1468009387	C16328			FDB027904|	CCC=CCC1C(CCCCCC=CC(=O)SCCNC(=O)CCNC(=O)C(C(COP(=O)(OP(=O)(OCC2OC(C(C2OP(=O)(O)O)O)n2cnc3c2ncnc3N)O)O)(C)C)O)CCC1=O	1
O95573	ACSL3_HUMAN	6.2.1.3	1569818701	33615|RHEA: 33616,Metrxn:127777,OCDCAFATPc|FACOAL180,rxn37341|rxn37338|rxn37333|rxn37328|rxn09449|rxn08454,MNXR102141|MNXR99164,RXN-16380,HMR_2957|HMR_0249	6.2.1A2(rev)	Stearoyl-CoA	1467870680	C00412	CCCCCCCCCCCCCCCCCC(=O)SCCNC(=O)CCNC(=O)C(C(COP(=O)(OP(=O)(OCC1OC(C(C1OP(=O)(O)O)O)n1cnc2c1ncnc2N)O)O)(C)C)O	OPC4-CoA	1468009450	C16335			FDB027895|	CCC=CCC1C(CCCC(=O)SCCNC(=O)CCNC(=O)C(C(COP(=O)(OP(=O)(OCC2OC(C(C2OP(=O)(O)O)O)n2cnc3c2ncnc3N)O)O)(C)C)O)CCC1=O	1
O95573	ACSL3_HUMAN	6.2.1.3	1569880463	46208|RHEA: 46209,Metrxn:127779,FACOAL200,rxn37339|rxn37334|rxn37329|rxn37325|rxn37323,MNXR128464,HMR_2966|HMR_0283	6.2.1A2(rev)	Eicosanoyl-CoA	1467885719	C02041	CCCCCCCCCCCCCCCCCCCC(=O)SCCNC(=O)CCNC(=O)C(C(COP(=O)(OP(=O)(OCC1OC(C(C1OP(=O)(O)O)O)n1cnc2c1ncnc2N)O)O)(C)C)O	3-Hydroxy-OPC8-CoA	1468009396	C16329				CCC=CCC1C(CCCCCC(CC(=O)SCCNC(=O)CCNC(=O)C(C(COP(=O)(OP(=O)(OCC2OC(C(C2OP(=O)(O)O)O)n2cnc3c2ncnc3N)O)O)(C)C)O)O)CCC1=O	1
O95573	ACSL3_HUMAN	6.2.1.3	1569818701	33615|RHEA: 33616,Metrxn:127777,OCDCAFATPc|FACOAL180,rxn37341|rxn37338|rxn37333|rxn37328|rxn09449|rxn08454,MNXR102141|MNXR99164,RXN-16380,HMR_2957|HMR_0249	6.2.1A2(rev)	Stearoyl-CoA	1467870680	C00412	CCCCCCCCCCCCCCCCCC(=O)SCCNC(=O)CCNC(=O)C(C(COP(=O)(OP(=O)(OCC1OC(C(C1OP(=O)(O)O)O)n1cnc2c1ncnc2N)O)O)(C)C)O	trans-2-Enoyl-OPC4-CoA	1468009459	C16336			FDB027902|	CCC=CCC1C(CC=CC(=O)SCCNC(=O)CCNC(=O)C(C(COP(=O)(OP(=O)(OCC2OC(C(C2OP(=O)(O)O)O)n2cnc3c2ncnc3N)O)O)(C)C)O)CCC1=O	1
O95573	ACSL3_HUMAN	6.2.1.3	1569880463	46208|RHEA: 46209,Metrxn:127779,FACOAL200,rxn37339|rxn37334|rxn37329|rxn37325|rxn37323,MNXR128464,HMR_2966|HMR_0283	6.2.1A2(rev)	Eicosanoyl-CoA	1467885719	C02041	CCCCCCCCCCCCCCCCCCCC(=O)SCCNC(=O)CCNC(=O)C(C(COP(=O)(OP(=O)(OCC1OC(C(C1OP(=O)(O)O)O)n1cnc2c1ncnc2N)O)O)(C)C)O	OPC6-CoA	1468009414	C16331			FDB027896|	CCC=CCC1C(CCCCCC(=O)SCCNC(=O)CCNC(=O)C(C(COP(=O)(OP(=O)(OCC2OC(C(C2OP(=O)(O)O)O)n2cnc3c2ncnc3N)O)O)(C)C)O)CCC1=O	1
O95573	ACSL3_HUMAN	6.2.1.3	1569818701	33615|RHEA: 33616,Metrxn:127777,OCDCAFATPc|FACOAL180,rxn37341|rxn37338|rxn37333|rxn37328|rxn09449|rxn08454,MNXR102141|MNXR99164,RXN-16380,HMR_2957|HMR_0249	6.2.1A2(rev)	Stearoyl-CoA	1467870680	C00412	CCCCCCCCCCCCCCCCCC(=O)SCCNC(=O)CCNC(=O)C(C(COP(=O)(OP(=O)(OCC1OC(C(C1OP(=O)(O)O)O)n1cnc2c1ncnc2N)O)O)(C)C)O	3-Hydroxy-OPC4-CoA	1468009468	C16337				CCC=CCC1C(CCC1=O)CC(CC(=O)SCCNC(=O)CCNC(=O)C(C(COP(=O)(OP(=O)(OCC1OC(C(C1OP(=O)(O)O)O)n1cnc2c1ncnc2N)O)O)(C)C)O)O	1
O95573	ACSL3_HUMAN	6.2.1.3	1569880463	46208|RHEA: 46209,Metrxn:127779,FACOAL200,rxn37339|rxn37334|rxn37329|rxn37325|rxn37323,MNXR128464,HMR_2966|HMR_0283	6.2.1A2(rev)	Eicosanoyl-CoA	1467885719	C02041	CCCCCCCCCCCCCCCCCCCC(=O)SCCNC(=O)CCNC(=O)C(C(COP(=O)(OP(=O)(OCC1OC(C(C1OP(=O)(O)O)O)n1cnc2c1ncnc2N)O)O)(C)C)O	trans-2-Enoyl-OPC6-CoA	1468009423	C16332			FDB027903|	CCC=CCC1C(CCCC=CC(=O)SCCNC(=O)CCNC(=O)C(C(COP(=O)(OP(=O)(OCC2OC(C(C2OP(=O)(O)O)O)n2cnc3c2ncnc3N)O)O)(C)C)O)CCC1=O	1
O95573	ACSL3_HUMAN	6.2.1.3	1569818701	33615|RHEA: 33616,Metrxn:127777,OCDCAFATPc|FACOAL180,rxn37341|rxn37338|rxn37333|rxn37328|rxn09449|rxn08454,MNXR102141|MNXR99164,RXN-16380,HMR_2957|HMR_0249	6.2.1A2(rev)	Stearoyl-CoA	1467870680	C00412	CCCCCCCCCCCCCCCCCC(=O)SCCNC(=O)CCNC(=O)C(C(COP(=O)(OP(=O)(OCC1OC(C(C1OP(=O)(O)O)O)n1cnc2c1ncnc2N)O)O)(C)C)O	(2E,6Z,9Z,12Z,15Z,18Z,21Z)-Tetracosaheptaenoyl-CoA	1468009846	C16374			FDB023865|	CCC=CCC=CCC=CCC=CCC=CCC=CCCC=CC(=O)SCCNC(=O)CCNC(=O)C(C(COP(=O)(OP(=O)(OCC1OC(C(C1OP(=O)(O)O)O)n1cnc2c1ncnc2N)O)O)(C)C)O	1
O95573	ACSL3_HUMAN	6.2.1.3	1569880463	46208|RHEA: 46209,Metrxn:127779,FACOAL200,rxn37339|rxn37334|rxn37329|rxn37325|rxn37323,MNXR128464,HMR_2966|HMR_0283	6.2.1A2(rev)	Eicosanoyl-CoA	1467885719	C02041	CCCCCCCCCCCCCCCCCCCC(=O)SCCNC(=O)CCNC(=O)C(C(COP(=O)(OP(=O)(OCC1OC(C(C1OP(=O)(O)O)O)n1cnc2c1ncnc2N)O)O)(C)C)O	3-Hydroxy-OPC6-CoA	1468009432	C16333				CCC=CCC1C(CCCC(CC(=O)SCCNC(=O)CCNC(=O)C(C(COP(=O)(OP(=O)(OCC2OC(C(C2OP(=O)(O)O)O)n2cnc3c2ncnc3N)O)O)(C)C)O)O)CCC1=O	1
O95573	ACSL3_HUMAN	6.2.1.3	1569818701	33615|RHEA: 33616,Metrxn:127777,OCDCAFATPc|FACOAL180,rxn37341|rxn37338|rxn37333|rxn37328|rxn09449|rxn08454,MNXR102141|MNXR99164,RXN-16380,HMR_2957|HMR_0249	6.2.1A2(rev)	Stearoyl-CoA	1467870680	C00412	CCCCCCCCCCCCCCCCCC(=O)SCCNC(=O)CCNC(=O)C(C(COP(=O)(OP(=O)(OCC1OC(C(C1OP(=O)(O)O)O)n1cnc2c1ncnc2N)O)O)(C)C)O	(3R,6Z,9Z,12Z,15Z,18Z,21Z)-3-Hydroxytetracosahexaenoyl-CoA	1468009855	C16375			FDB029088|	CCC=CCC=CCC=CCC=CCC=CCC=CCCC(CC(=O)SCCNC(=O)CCNC(=O)C(C(COP(=O)(OP(=O)(OCC1OC(C(C1OP(=O)(O)O)O)n1cnc2c1ncnc2N)O)O)(C)C)O)O	1
O95573	ACSL3_HUMAN	6.2.1.3	1569880463	46208|RHEA: 46209,Metrxn:127779,FACOAL200,rxn37339|rxn37334|rxn37329|rxn37325|rxn37323,MNXR128464,HMR_2966|HMR_0283	6.2.1A2(rev)	Eicosanoyl-CoA	1467885719	C02041	CCCCCCCCCCCCCCCCCCCC(=O)SCCNC(=O)CCNC(=O)C(C(COP(=O)(OP(=O)(OCC1OC(C(C1OP(=O)(O)O)O)n1cnc2c1ncnc2N)O)O)(C)C)O	OPC4-CoA	1468009450	C16335			FDB027895|	CCC=CCC1C(CCCC(=O)SCCNC(=O)CCNC(=O)C(C(COP(=O)(OP(=O)(OCC2OC(C(C2OP(=O)(O)O)O)n2cnc3c2ncnc3N)O)O)(C)C)O)CCC1=O	1
O95573	ACSL3_HUMAN	6.2.1.3	1569818701	33615|RHEA: 33616,Metrxn:127777,OCDCAFATPc|FACOAL180,rxn37341|rxn37338|rxn37333|rxn37328|rxn09449|rxn08454,MNXR102141|MNXR99164,RXN-16380,HMR_2957|HMR_0249	6.2.1A2(rev)	Stearoyl-CoA	1467870680	C00412	CCCCCCCCCCCCCCCCCC(=O)SCCNC(=O)CCNC(=O)C(C(COP(=O)(OP(=O)(OCC1OC(C(C1OP(=O)(O)O)O)n1cnc2c1ncnc2N)O)O)(C)C)O	(3R,6Z,9Z,12Z,15Z,18Z)-3-Hydroxytetracosapentaenoyl-CoA	1468009893	C16388				CCCCCC=CCC=CCC=CCC=CCC=CCCC(CC(=O)SCCNC(=O)CCNC(=O)C(C(COP(=O)(OP(=O)(OCC1OC(C(C1OP(=O)(O)O)O)n1cnc2c1ncnc2N)O)O)(C)C)O)O	1
O95573	ACSL3_HUMAN	6.2.1.3	1569880463	46208|RHEA: 46209,Metrxn:127779,FACOAL200,rxn37339|rxn37334|rxn37329|rxn37325|rxn37323,MNXR128464,HMR_2966|HMR_0283	6.2.1A2(rev)	Eicosanoyl-CoA	1467885719	C02041	CCCCCCCCCCCCCCCCCCCC(=O)SCCNC(=O)CCNC(=O)C(C(COP(=O)(OP(=O)(OCC1OC(C(C1OP(=O)(O)O)O)n1cnc2c1ncnc2N)O)O)(C)C)O	trans-2-Enoyl-OPC4-CoA	1468009459	C16336			FDB027902|	CCC=CCC1C(CC=CC(=O)SCCNC(=O)CCNC(=O)C(C(COP(=O)(OP(=O)(OCC2OC(C(C2OP(=O)(O)O)O)n2cnc3c2ncnc3N)O)O)(C)C)O)CCC1=O	1
O95573	ACSL3_HUMAN	6.2.1.3	1569818701	33615|RHEA: 33616,Metrxn:127777,OCDCAFATPc|FACOAL180,rxn37341|rxn37338|rxn37333|rxn37328|rxn09449|rxn08454,MNXR102141|MNXR99164,RXN-16380,HMR_2957|HMR_0249	6.2.1A2(rev)	Stearoyl-CoA	1467870680	C00412	CCCCCCCCCCCCCCCCCC(=O)SCCNC(=O)CCNC(=O)C(C(COP(=O)(OP(=O)(OCC1OC(C(C1OP(=O)(O)O)O)n1cnc2c1ncnc2N)O)O)(C)C)O	Citronellyl-CoA	1468010630	C16464				CC(CC(=O)SCCNC(=O)CCNC(=O)C(C(COP(=O)(OP(=O)(OCC1OC(C(C1OP(=O)(O)O)O)n1cnc2c1ncnc2N)O)O)(C)C)O)CCC=C(C)C	1
O95573	ACSL3_HUMAN	6.2.1.3	1569880463	46208|RHEA: 46209,Metrxn:127779,FACOAL200,rxn37339|rxn37334|rxn37329|rxn37325|rxn37323,MNXR128464,HMR_2966|HMR_0283	6.2.1A2(rev)	Eicosanoyl-CoA	1467885719	C02041	CCCCCCCCCCCCCCCCCCCC(=O)SCCNC(=O)CCNC(=O)C(C(COP(=O)(OP(=O)(OCC1OC(C(C1OP(=O)(O)O)O)n1cnc2c1ncnc2N)O)O)(C)C)O	3-Hydroxy-OPC4-CoA	1468009468	C16337				CCC=CCC1C(CCC1=O)CC(CC(=O)SCCNC(=O)CCNC(=O)C(C(COP(=O)(OP(=O)(OCC1OC(C(C1OP(=O)(O)O)O)n1cnc2c1ncnc2N)O)O)(C)C)O)O	1
O95573	ACSL3_HUMAN	6.2.1.3	1569880463	46208|RHEA: 46209,Metrxn:127779,FACOAL200,rxn37339|rxn37334|rxn37329|rxn37325|rxn37323,MNXR128464,HMR_2966|HMR_0283	6.2.1A2(rev)	Eicosanoyl-CoA	1467885719	C02041	CCCCCCCCCCCCCCCCCCCC(=O)SCCNC(=O)CCNC(=O)C(C(COP(=O)(OP(=O)(OCC1OC(C(C1OP(=O)(O)O)O)n1cnc2c1ncnc2N)O)O)(C)C)O	(2E,6Z,9Z,12Z,15Z,18Z,21Z)-Tetracosaheptaenoyl-CoA	1468009846	C16374			FDB023865|	CCC=CCC=CCC=CCC=CCC=CCC=CCCC=CC(=O)SCCNC(=O)CCNC(=O)C(C(COP(=O)(OP(=O)(OCC1OC(C(C1OP(=O)(O)O)O)n1cnc2c1ncnc2N)O)O)(C)C)O	1
O95573	ACSL3_HUMAN	6.2.1.3	1569818701	33615|RHEA: 33616,Metrxn:127777,OCDCAFATPc|FACOAL180,rxn37341|rxn37338|rxn37333|rxn37328|rxn09449|rxn08454,MNXR102141|MNXR99164,RXN-16380,HMR_2957|HMR_0249	6.2.1A2(rev)	Stearoyl-CoA	1467870680	C00412	CCCCCCCCCCCCCCCCCC(=O)SCCNC(=O)CCNC(=O)C(C(COP(=O)(OP(=O)(OCC1OC(C(C1OP(=O)(O)O)O)n1cnc2c1ncnc2N)O)O)(C)C)O	(2E)-5-Methylhexa-2,4-dienoyl-CoA	1468010665	C16468				O=C(NCCSC(=O)C=CC=C(C)C)CCNC(=O)C(C(COP(=O)(OP(=O)(OCC1OC(C(C1OP(=O)(O)O)O)n1cnc2c1ncnc2N)O)O)(C)C)O	1
O95573	ACSL3_HUMAN	6.2.1.3	1569880463	46208|RHEA: 46209,Metrxn:127779,FACOAL200,rxn37339|rxn37334|rxn37329|rxn37325|rxn37323,MNXR128464,HMR_2966|HMR_0283	6.2.1A2(rev)	Eicosanoyl-CoA	1467885719	C02041	CCCCCCCCCCCCCCCCCCCC(=O)SCCNC(=O)CCNC(=O)C(C(COP(=O)(OP(=O)(OCC1OC(C(C1OP(=O)(O)O)O)n1cnc2c1ncnc2N)O)O)(C)C)O	(3R,6Z,9Z,12Z,15Z,18Z,21Z)-3-Hydroxytetracosahexaenoyl-CoA	1468009855	C16375			FDB029088|	CCC=CCC=CCC=CCC=CCC=CCC=CCCC(CC(=O)SCCNC(=O)CCNC(=O)C(C(COP(=O)(OP(=O)(OCC1OC(C(C1OP(=O)(O)O)O)n1cnc2c1ncnc2N)O)O)(C)C)O)O	1
O95573	ACSL3_HUMAN	6.2.1.3	1569818701	33615|RHEA: 33616,Metrxn:127777,OCDCAFATPc|FACOAL180,rxn37341|rxn37338|rxn37333|rxn37328|rxn09449|rxn08454,MNXR102141|MNXR99164,RXN-16380,HMR_2957|HMR_0249	6.2.1A2(rev)	Stearoyl-CoA	1467870680	C00412	CCCCCCCCCCCCCCCCCC(=O)SCCNC(=O)CCNC(=O)C(C(COP(=O)(OP(=O)(OCC1OC(C(C1OP(=O)(O)O)O)n1cnc2c1ncnc2N)O)O)(C)C)O	3-Hydroxy-5-methylhex-4-enoyl-CoA	1468010674	C16469				O=C(NCCSC(=O)CC(C=C(C)C)O)CCNC(=O)C(C(COP(=O)(OP(=O)(OCC1OC(C(C1OP(=O)(O)O)O)n1cnc2c1ncnc2N)O)O)(C)C)O	1
O95573	ACSL3_HUMAN	6.2.1.3	1569880463	46208|RHEA: 46209,Metrxn:127779,FACOAL200,rxn37339|rxn37334|rxn37329|rxn37325|rxn37323,MNXR128464,HMR_2966|HMR_0283	6.2.1A2(rev)	Eicosanoyl-CoA	1467885719	C02041	CCCCCCCCCCCCCCCCCCCC(=O)SCCNC(=O)CCNC(=O)C(C(COP(=O)(OP(=O)(OCC1OC(C(C1OP(=O)(O)O)O)n1cnc2c1ncnc2N)O)O)(C)C)O	(3R,6Z,9Z,12Z,15Z,18Z)-3-Hydroxytetracosapentaenoyl-CoA	1468009893	C16388				CCCCCC=CCC=CCC=CCC=CCC=CCCC(CC(=O)SCCNC(=O)CCNC(=O)C(C(COP(=O)(OP(=O)(OCC1OC(C(C1OP(=O)(O)O)O)n1cnc2c1ncnc2N)O)O)(C)C)O)O	1
O95573	ACSL3_HUMAN	6.2.1.3	1569818701	33615|RHEA: 33616,Metrxn:127777,OCDCAFATPc|FACOAL180,rxn37341|rxn37338|rxn37333|rxn37328|rxn09449|rxn08454,MNXR102141|MNXR99164,RXN-16380,HMR_2957|HMR_0249	6.2.1A2(rev)	Stearoyl-CoA	1467870680	C00412	CCCCCCCCCCCCCCCCCC(=O)SCCNC(=O)CCNC(=O)C(C(COP(=O)(OP(=O)(OCC1OC(C(C1OP(=O)(O)O)O)n1cnc2c1ncnc2N)O)O)(C)C)O	5-Methylhex-4-enoyl-CoA	1468010683	C16470				O=C(NCCSC(=O)CCC=C(C)C)CCNC(=O)C(C(COP(=O)(OP(=O)(OCC1OC(C(C1OP(=O)(O)O)O)n1cnc2c1ncnc2N)O)O)(C)C)O	1
O95573	ACSL3_HUMAN	6.2.1.3	1569880463	46208|RHEA: 46209,Metrxn:127779,FACOAL200,rxn37339|rxn37334|rxn37329|rxn37325|rxn37323,MNXR128464,HMR_2966|HMR_0283	6.2.1A2(rev)	Eicosanoyl-CoA	1467885719	C02041	CCCCCCCCCCCCCCCCCCCC(=O)SCCNC(=O)CCNC(=O)C(C(COP(=O)(OP(=O)(OCC1OC(C(C1OP(=O)(O)O)O)n1cnc2c1ncnc2N)O)O)(C)C)O	Citronellyl-CoA	1468010630	C16464				CC(CC(=O)SCCNC(=O)CCNC(=O)C(C(COP(=O)(OP(=O)(OCC1OC(C(C1OP(=O)(O)O)O)n1cnc2c1ncnc2N)O)O)(C)C)O)CCC=C(C)C	1
O95573	ACSL3_HUMAN	6.2.1.3	1569880463	46208|RHEA: 46209,Metrxn:127779,FACOAL200,rxn37339|rxn37334|rxn37329|rxn37325|rxn37323,MNXR128464,HMR_2966|HMR_0283	6.2.1A2(rev)	Eicosanoyl-CoA	1467885719	C02041	CCCCCCCCCCCCCCCCCCCC(=O)SCCNC(=O)CCNC(=O)C(C(COP(=O)(OP(=O)(OCC1OC(C(C1OP(=O)(O)O)O)n1cnc2c1ncnc2N)O)O)(C)C)O	(2E)-5-Methylhexa-2,4-dienoyl-CoA	1468010665	C16468				O=C(NCCSC(=O)C=CC=C(C)C)CCNC(=O)C(C(COP(=O)(OP(=O)(OCC1OC(C(C1OP(=O)(O)O)O)n1cnc2c1ncnc2N)O)O)(C)C)O	1
O95573	ACSL3_HUMAN	6.2.1.3	1569818701	33615|RHEA: 33616,Metrxn:127777,OCDCAFATPc|FACOAL180,rxn37341|rxn37338|rxn37333|rxn37328|rxn09449|rxn08454,MNXR102141|MNXR99164,RXN-16380,HMR_2957|HMR_0249	6.2.1A2(rev)	Stearoyl-CoA	1467870680	C00412	CCCCCCCCCCCCCCCCCC(=O)SCCNC(=O)CCNC(=O)C(C(COP(=O)(OP(=O)(OCC1OC(C(C1OP(=O)(O)O)O)n1cnc2c1ncnc2N)O)O)(C)C)O	Docosanoyl-CoA	1468011272	C16528			FDB029210|	CCCCCCCCCCCCCCCCCCCCCC(=O)SCCNC(=O)CCNC(=O)C(C(COP(=O)(OP(=O)(OCC1OC(C(C1OP(=O)(O)O)O)n1cnc2c1ncnc2N)O)O)(C)C)O	1
O95573	ACSL3_HUMAN	6.2.1.3	1569880463	46208|RHEA: 46209,Metrxn:127779,FACOAL200,rxn37339|rxn37334|rxn37329|rxn37325|rxn37323,MNXR128464,HMR_2966|HMR_0283	6.2.1A2(rev)	Eicosanoyl-CoA	1467885719	C02041	CCCCCCCCCCCCCCCCCCCC(=O)SCCNC(=O)CCNC(=O)C(C(COP(=O)(OP(=O)(OCC1OC(C(C1OP(=O)(O)O)O)n1cnc2c1ncnc2N)O)O)(C)C)O	3-Hydroxy-5-methylhex-4-enoyl-CoA	1468010674	C16469				O=C(NCCSC(=O)CC(C=C(C)C)O)CCNC(=O)C(C(COP(=O)(OP(=O)(OCC1OC(C(C1OP(=O)(O)O)O)n1cnc2c1ncnc2N)O)O)(C)C)O	1
O95573	ACSL3_HUMAN	6.2.1.3	1569818701	33615|RHEA: 33616,Metrxn:127777,OCDCAFATPc|FACOAL180,rxn37341|rxn37338|rxn37333|rxn37328|rxn09449|rxn08454,MNXR102141|MNXR99164,RXN-16380,HMR_2957|HMR_0249	6.2.1A2(rev)	Stearoyl-CoA	1467870680	C00412	CCCCCCCCCCCCCCCCCC(=O)SCCNC(=O)CCNC(=O)C(C(COP(=O)(OP(=O)(OCC1OC(C(C1OP(=O)(O)O)O)n1cnc2c1ncnc2N)O)O)(C)C)O	Icosenoyl-CoA	1468011292	C16530				CCCCCCCCC=CCCCCCCCCCC(=O)SCCNC(=O)CCNC(=O)C(C(COP(=O)(OP(=O)(OCC1OC(C(C1OP(=O)(O)O)O)n1cnc2c1ncnc2N)O)O)(C)C)O	1
O95573	ACSL3_HUMAN	6.2.1.3	1569880463	46208|RHEA: 46209,Metrxn:127779,FACOAL200,rxn37339|rxn37334|rxn37329|rxn37325|rxn37323,MNXR128464,HMR_2966|HMR_0283	6.2.1A2(rev)	Eicosanoyl-CoA	1467885719	C02041	CCCCCCCCCCCCCCCCCCCC(=O)SCCNC(=O)CCNC(=O)C(C(COP(=O)(OP(=O)(OCC1OC(C(C1OP(=O)(O)O)O)n1cnc2c1ncnc2N)O)O)(C)C)O	5-Methylhex-4-enoyl-CoA	1468010683	C16470				O=C(NCCSC(=O)CCC=C(C)C)CCNC(=O)C(C(COP(=O)(OP(=O)(OCC1OC(C(C1OP(=O)(O)O)O)n1cnc2c1ncnc2N)O)O)(C)C)O	1
O95573	ACSL3_HUMAN	6.2.1.3	1569880463	46208|RHEA: 46209,Metrxn:127779,FACOAL200,rxn37339|rxn37334|rxn37329|rxn37325|rxn37323,MNXR128464,HMR_2966|HMR_0283	6.2.1A2(rev)	Eicosanoyl-CoA	1467885719	C02041	CCCCCCCCCCCCCCCCCCCC(=O)SCCNC(=O)CCNC(=O)C(C(COP(=O)(OP(=O)(OCC1OC(C(C1OP(=O)(O)O)O)n1cnc2c1ncnc2N)O)O)(C)C)O	Docosanoyl-CoA	1468011272	C16528			FDB029210|	CCCCCCCCCCCCCCCCCCCCCC(=O)SCCNC(=O)CCNC(=O)C(C(COP(=O)(OP(=O)(OCC1OC(C(C1OP(=O)(O)O)O)n1cnc2c1ncnc2N)O)O)(C)C)O	1
O95573	ACSL3_HUMAN	6.2.1.3	1569818701	33615|RHEA: 33616,Metrxn:127777,OCDCAFATPc|FACOAL180,rxn37341|rxn37338|rxn37333|rxn37328|rxn09449|rxn08454,MNXR102141|MNXR99164,RXN-16380,HMR_2957|HMR_0249	6.2.1A2(rev)	Stearoyl-CoA	1467870680	C00412	CCCCCCCCCCCCCCCCCC(=O)SCCNC(=O)CCNC(=O)C(C(COP(=O)(OP(=O)(OCC1OC(C(C1OP(=O)(O)O)O)n1cnc2c1ncnc2N)O)O)(C)C)O	Docosenoyl-CoA	1468011304	C16531				CCCCCCCCC=CCCCCCCCCCCCC(=O)SCCNC(=O)CCNC(=O)C(C(COP(=O)(OP(=O)(OCC1OC(C(C1OP(=O)(O)O)O)n1cnc2c1ncnc2N)O)O)(C)C)O	1
O95573	ACSL3_HUMAN	6.2.1.3	1569880463	46208|RHEA: 46209,Metrxn:127779,FACOAL200,rxn37339|rxn37334|rxn37329|rxn37325|rxn37323,MNXR128464,HMR_2966|HMR_0283	6.2.1A2(rev)	Eicosanoyl-CoA	1467885719	C02041	CCCCCCCCCCCCCCCCCCCC(=O)SCCNC(=O)CCNC(=O)C(C(COP(=O)(OP(=O)(OCC1OC(C(C1OP(=O)(O)O)O)n1cnc2c1ncnc2N)O)O)(C)C)O	Icosenoyl-CoA	1468011292	C16530				CCCCCCCCC=CCCCCCCCCCC(=O)SCCNC(=O)CCNC(=O)C(C(COP(=O)(OP(=O)(OCC1OC(C(C1OP(=O)(O)O)O)n1cnc2c1ncnc2N)O)O)(C)C)O	1
O95573	ACSL3_HUMAN	6.2.1.3	1569880463	46208|RHEA: 46209,Metrxn:127779,FACOAL200,rxn37339|rxn37334|rxn37329|rxn37325|rxn37323,MNXR128464,HMR_2966|HMR_0283	6.2.1A2(rev)	Eicosanoyl-CoA	1467885719	C02041	CCCCCCCCCCCCCCCCCCCC(=O)SCCNC(=O)CCNC(=O)C(C(COP(=O)(OP(=O)(OCC1OC(C(C1OP(=O)(O)O)O)n1cnc2c1ncnc2N)O)O)(C)C)O	Docosenoyl-CoA	1468011304	C16531				CCCCCCCCC=CCCCCCCCCCCCC(=O)SCCNC(=O)CCNC(=O)C(C(COP(=O)(OP(=O)(OCC1OC(C(C1OP(=O)(O)O)O)n1cnc2c1ncnc2N)O)O)(C)C)O	1
O95573	ACSL3_HUMAN	6.2.1.3	1569818701	33615|RHEA: 33616,Metrxn:127777,OCDCAFATPc|FACOAL180,rxn37341|rxn37338|rxn37333|rxn37328|rxn09449|rxn08454,MNXR102141|MNXR99164,RXN-16380,HMR_2957|HMR_0249	6.2.1A2(rev)	Stearoyl-CoA	1467870680	C00412	CCCCCCCCCCCCCCCCCC(=O)SCCNC(=O)CCNC(=O)C(C(COP(=O)(OP(=O)(OCC1OC(C(C1OP(=O)(O)O)O)n1cnc2c1ncnc2N)O)O)(C)C)O	(13Z,16Z)-Docosadienoyl-CoA	1468012388	C16645				CCCCCC=CCC=CCCCCCCCCCCCC(=O)SCCNC(=O)CCNC(=O)C(C(COP(=O)(OP(=O)(OCC1OC(C(C1OP(=O)(O)O)O)n1cnc2c1ncnc2N)O)O)(C)C)O	1
O95573	ACSL3_HUMAN	6.2.1.3	1569880463	46208|RHEA: 46209,Metrxn:127779,FACOAL200,rxn37339|rxn37334|rxn37329|rxn37325|rxn37323,MNXR128464,HMR_2966|HMR_0283	6.2.1A2(rev)	Eicosanoyl-CoA	1467885719	C02041	CCCCCCCCCCCCCCCCCCCC(=O)SCCNC(=O)CCNC(=O)C(C(COP(=O)(OP(=O)(OCC1OC(C(C1OP(=O)(O)O)O)n1cnc2c1ncnc2N)O)O)(C)C)O	(13Z,16Z)-Docosadienoyl-CoA	1468012388	C16645				CCCCCC=CCC=CCCCCCCCCCCCC(=O)SCCNC(=O)CCNC(=O)C(C(COP(=O)(OP(=O)(OCC1OC(C(C1OP(=O)(O)O)O)n1cnc2c1ncnc2N)O)O)(C)C)O	1
O95573	ACSL3_HUMAN	6.2.1.3	1569818701	33615|RHEA: 33616,Metrxn:127777,OCDCAFATPc|FACOAL180,rxn37341|rxn37338|rxn37333|rxn37328|rxn09449|rxn08454,MNXR102141|MNXR99164,RXN-16380,HMR_2957|HMR_0249	6.2.1A2(rev)	Stearoyl-CoA	1467870680	C00412	CCCCCCCCCCCCCCCCCC(=O)SCCNC(=O)CCNC(=O)C(C(COP(=O)(OP(=O)(OCC1OC(C(C1OP(=O)(O)O)O)n1cnc2c1ncnc2N)O)O)(C)C)O	beta-Phenylalanoyl-CoA	1468014214	C16833				O=C(NCCSC(=O)CC(c1ccccc1)N)CCNC(=O)C(C(COP(=O)(OP(=O)(OCC1OC(C(C1OP(=O)(O)O)O)n1cnc2c1ncnc2N)O)O)(C)C)O	1
O95573	ACSL3_HUMAN	6.2.1.3	1569880463	46208|RHEA: 46209,Metrxn:127779,FACOAL200,rxn37339|rxn37334|rxn37329|rxn37325|rxn37323,MNXR128464,HMR_2966|HMR_0283	6.2.1A2(rev)	Eicosanoyl-CoA	1467885719	C02041	CCCCCCCCCCCCCCCCCCCC(=O)SCCNC(=O)CCNC(=O)C(C(COP(=O)(OP(=O)(OCC1OC(C(C1OP(=O)(O)O)O)n1cnc2c1ncnc2N)O)O)(C)C)O	beta-Phenylalanoyl-CoA	1468014214	C16833				O=C(NCCSC(=O)CC(c1ccccc1)N)CCNC(=O)C(C(COP(=O)(OP(=O)(OCC1OC(C(C1OP(=O)(O)O)O)n1cnc2c1ncnc2N)O)O)(C)C)O	1
O95573	ACSL3_HUMAN	6.2.1.3	1569880463	46208|RHEA: 46209,Metrxn:127779,FACOAL200,rxn37339|rxn37334|rxn37329|rxn37325|rxn37323,MNXR128464,HMR_2966|HMR_0283	6.2.1A2(rev)	Eicosanoyl-CoA	1467885719	C02041	CCCCCCCCCCCCCCCCCCCC(=O)SCCNC(=O)CCNC(=O)C(C(COP(=O)(OP(=O)(OCC1OC(C(C1OP(=O)(O)O)O)n1cnc2c1ncnc2N)O)O)(C)C)O	p-Coumaroyl-diketide-CoA	1468021922	C17740				O=C(NCCSC(=O)CC(=O)C=Cc1ccc(cc1)O)CCNC(=O)C(C(COP(=O)(OP(=O)(OCC1OC(C(C1OP(=O)(O)O)O)n1cnc2c1ncnc2N)O)O)(C)C)O	1
O95573	ACSL3_HUMAN	6.2.1.3	1569818701	33615|RHEA: 33616,Metrxn:127777,OCDCAFATPc|FACOAL180,rxn37341|rxn37338|rxn37333|rxn37328|rxn09449|rxn08454,MNXR102141|MNXR99164,RXN-16380,HMR_2957|HMR_0249	6.2.1A2(rev)	Stearoyl-CoA	1467870680	C00412	CCCCCCCCCCCCCCCCCC(=O)SCCNC(=O)CCNC(=O)C(C(COP(=O)(OP(=O)(OCC1OC(C(C1OP(=O)(O)O)O)n1cnc2c1ncnc2N)O)O)(C)C)O	p-Coumaroyl-diketide-CoA	1468021922	C17740				O=C(NCCSC(=O)CC(=O)C=Cc1ccc(cc1)O)CCNC(=O)C(C(COP(=O)(OP(=O)(OCC1OC(C(C1OP(=O)(O)O)O)n1cnc2c1ncnc2N)O)O)(C)C)O	1
O95573	ACSL3_HUMAN	6.2.1.3	1569880463	46208|RHEA: 46209,Metrxn:127779,FACOAL200,rxn37339|rxn37334|rxn37329|rxn37325|rxn37323,MNXR128464,HMR_2966|HMR_0283	6.2.1A2(rev)	Eicosanoyl-CoA	1467885719	C02041	CCCCCCCCCCCCCCCCCCCC(=O)SCCNC(=O)CCNC(=O)C(C(COP(=O)(OP(=O)(OCC1OC(C(C1OP(=O)(O)O)O)n1cnc2c1ncnc2N)O)O)(C)C)O	Feruloyl-diketide-CoA	1468021931	C17741				COc1cc(C=CC(=O)CC(=O)SCCNC(=O)CCNC(=O)C(C(COP(=O)(OP(=O)(OCC2OC(C(C2OP(=O)(O)O)O)n2cnc3c2ncnc3N)O)O)(C)C)O)ccc1O	1
O95573	ACSL3_HUMAN	6.2.1.3	1569818701	33615|RHEA: 33616,Metrxn:127777,OCDCAFATPc|FACOAL180,rxn37341|rxn37338|rxn37333|rxn37328|rxn09449|rxn08454,MNXR102141|MNXR99164,RXN-16380,HMR_2957|HMR_0249	6.2.1A2(rev)	Stearoyl-CoA	1467870680	C00412	CCCCCCCCCCCCCCCCCC(=O)SCCNC(=O)CCNC(=O)C(C(COP(=O)(OP(=O)(OCC1OC(C(C1OP(=O)(O)O)O)n1cnc2c1ncnc2N)O)O)(C)C)O	Feruloyl-diketide-CoA	1468021931	C17741				COc1cc(C=CC(=O)CC(=O)SCCNC(=O)CCNC(=O)C(C(COP(=O)(OP(=O)(OCC2OC(C(C2OP(=O)(O)O)O)n2cnc3c2ncnc3N)O)O)(C)C)O)ccc1O	1
O95573	ACSL3_HUMAN	6.2.1.3	1569880463	46208|RHEA: 46209,Metrxn:127779,FACOAL200,rxn37339|rxn37334|rxn37329|rxn37325|rxn37323,MNXR128464,HMR_2966|HMR_0283	6.2.1A2(rev)	Eicosanoyl-CoA	1467885719	C02041	CCCCCCCCCCCCCCCCCCCC(=O)SCCNC(=O)CCNC(=O)C(C(COP(=O)(OP(=O)(OCC1OC(C(C1OP(=O)(O)O)O)n1cnc2c1ncnc2N)O)O)(C)C)O	3-Methylfumaryl-CoA	1468027200	C18323				O=C(NCCSC(=O)C=C(C(=O)O)C)CCNC(=O)C(C(COP(=O)(OP(=O)(OCC1OC(C(C1OP(=O)(O)O)O)n1cnc2c1ncnc2N)O)O)(C)C)O	1
O95573	ACSL3_HUMAN	6.2.1.3	1569880463	46208|RHEA: 46209,Metrxn:127779,FACOAL200,rxn37339|rxn37334|rxn37329|rxn37325|rxn37323,MNXR128464,HMR_2966|HMR_0283	6.2.1A2(rev)	Eicosanoyl-CoA	1467885719	C02041	CCCCCCCCCCCCCCCCCCCC(=O)SCCNC(=O)CCNC(=O)C(C(COP(=O)(OP(=O)(OCC1OC(C(C1OP(=O)(O)O)O)n1cnc2c1ncnc2N)O)O)(C)C)O	(2S)-Methylsuccinyl-CoA	1468027210	C18324				O=C(NCCSC(=O)C(CC(=O)O)C)CCNC(=O)C(C(COP(=O)(OP(=O)(OCC1OC(C(C1OP(=O)(O)O)O)n1cnc2c1ncnc2N)O)O)(C)C)O	1
O95573	ACSL3_HUMAN	6.2.1.3	1569818701	33615|RHEA: 33616,Metrxn:127777,OCDCAFATPc|FACOAL180,rxn37341|rxn37338|rxn37333|rxn37328|rxn09449|rxn08454,MNXR102141|MNXR99164,RXN-16380,HMR_2957|HMR_0249	6.2.1A2(rev)	Stearoyl-CoA	1467870680	C00412	CCCCCCCCCCCCCCCCCC(=O)SCCNC(=O)CCNC(=O)C(C(COP(=O)(OP(=O)(OCC1OC(C(C1OP(=O)(O)O)O)n1cnc2c1ncnc2N)O)O)(C)C)O	3-Methylfumaryl-CoA	1468027200	C18323				O=C(NCCSC(=O)C=C(C(=O)O)C)CCNC(=O)C(C(COP(=O)(OP(=O)(OCC1OC(C(C1OP(=O)(O)O)O)n1cnc2c1ncnc2N)O)O)(C)C)O	1
O95573	ACSL3_HUMAN	6.2.1.3	1569880463	46208|RHEA: 46209,Metrxn:127779,FACOAL200,rxn37339|rxn37334|rxn37329|rxn37325|rxn37323,MNXR128464,HMR_2966|HMR_0283	6.2.1A2(rev)	Eicosanoyl-CoA	1467885719	C02041	CCCCCCCCCCCCCCCCCCCC(=O)SCCNC(=O)CCNC(=O)C(C(COP(=O)(OP(=O)(OCC1OC(C(C1OP(=O)(O)O)O)n1cnc2c1ncnc2N)O)O)(C)C)O	Propylmalonyl-CoA	1468031841	C18834				CCCC(C(=O)SCCNC(=O)CCNC(=O)C(C(COP(=O)(OP(=O)(OCC1OC(C(C1OP(=O)(O)O)O)n1cnc2c1ncnc2N)O)O)(C)C)O)C(=O)O	1
O95573	ACSL3_HUMAN	6.2.1.3	1569880463	46208|RHEA: 46209,Metrxn:127779,FACOAL200,rxn37339|rxn37334|rxn37329|rxn37325|rxn37323,MNXR128464,HMR_2966|HMR_0283	6.2.1A2(rev)	Eicosanoyl-CoA	1467885719	C02041	CCCCCCCCCCCCCCCCCCCC(=O)SCCNC(=O)CCNC(=O)C(C(COP(=O)(OP(=O)(OCC1OC(C(C1OP(=O)(O)O)O)n1cnc2c1ncnc2N)O)O)(C)C)O	3,4-Didehydroadipyl-CoA	1468039539	C19682				O=C(NCCSC(=O)CC=CCC(=O)O)CCNC(=O)C(C(COP(=O)(OP(=O)(OCC1OC(C(C1OP(=O)(O)O)O)n1cnc2c1ncnc2N)O)O)(C)C)O	1
O95573	ACSL3_HUMAN	6.2.1.3	1569818701	33615|RHEA: 33616,Metrxn:127777,OCDCAFATPc|FACOAL180,rxn37341|rxn37338|rxn37333|rxn37328|rxn09449|rxn08454,MNXR102141|MNXR99164,RXN-16380,HMR_2957|HMR_0249	6.2.1A2(rev)	Stearoyl-CoA	1467870680	C00412	CCCCCCCCCCCCCCCCCC(=O)SCCNC(=O)CCNC(=O)C(C(COP(=O)(OP(=O)(OCC1OC(C(C1OP(=O)(O)O)O)n1cnc2c1ncnc2N)O)O)(C)C)O	(2S)-Methylsuccinyl-CoA	1468027210	C18324				O=C(NCCSC(=O)C(CC(=O)O)C)CCNC(=O)C(C(COP(=O)(OP(=O)(OCC1OC(C(C1OP(=O)(O)O)O)n1cnc2c1ncnc2N)O)O)(C)C)O	1
O95573	ACSL3_HUMAN	6.2.1.3	1569880463	46208|RHEA: 46209,Metrxn:127779,FACOAL200,rxn37339|rxn37334|rxn37329|rxn37325|rxn37323,MNXR128464,HMR_2966|HMR_0283	6.2.1A2(rev)	Eicosanoyl-CoA	1467885719	C02041	CCCCCCCCCCCCCCCCCCCC(=O)SCCNC(=O)CCNC(=O)C(C(COP(=O)(OP(=O)(OCC1OC(C(C1OP(=O)(O)O)O)n1cnc2c1ncnc2N)O)O)(C)C)O	3,4-Didehydroadipyl-CoA semialdehyde	1468039547	C19683				O=CCC=CCC(=O)SCCNC(=O)CCNC(=O)C(C(COP(=O)(OP(=O)(OCC1OC(C(C1OP(=O)(O)O)O)n1cnc2c1ncnc2N)O)O)(C)C)O	1
O95573	ACSL3_HUMAN	6.2.1.3	1569818701	33615|RHEA: 33616,Metrxn:127777,OCDCAFATPc|FACOAL180,rxn37341|rxn37338|rxn37333|rxn37328|rxn09449|rxn08454,MNXR102141|MNXR99164,RXN-16380,HMR_2957|HMR_0249	6.2.1A2(rev)	Stearoyl-CoA	1467870680	C00412	CCCCCCCCCCCCCCCCCC(=O)SCCNC(=O)CCNC(=O)C(C(COP(=O)(OP(=O)(OCC1OC(C(C1OP(=O)(O)O)O)n1cnc2c1ncnc2N)O)O)(C)C)O	Propylmalonyl-CoA	1468031841	C18834				CCCC(C(=O)SCCNC(=O)CCNC(=O)C(C(COP(=O)(OP(=O)(OCC1OC(C(C1OP(=O)(O)O)O)n1cnc2c1ncnc2N)O)O)(C)C)O)C(=O)O	1
O95573	ACSL3_HUMAN	6.2.1.3	1569880463	46208|RHEA: 46209,Metrxn:127779,FACOAL200,rxn37339|rxn37334|rxn37329|rxn37325|rxn37323,MNXR128464,HMR_2966|HMR_0283	6.2.1A2(rev)	Eicosanoyl-CoA	1467885719	C02041	CCCCCCCCCCCCCCCCCCCC(=O)SCCNC(=O)CCNC(=O)C(C(COP(=O)(OP(=O)(OCC1OC(C(C1OP(=O)(O)O)O)n1cnc2c1ncnc2N)O)O)(C)C)O	2,3-Epoxy-2,3-dihydrobenzoyl-CoA	1468039555	C19684				O=C(NCCSC(=O)C1=CC=CC(C1O)O)CCNC(=O)C(C(COP(=O)(OP(=O)(OCC1OC(C(C1OP(=O)(O)O)O)n1cnc2c1ncnc2N)O)O)(C)C)O	1
O95573	ACSL3_HUMAN	6.2.1.3	1569818701	33615|RHEA: 33616,Metrxn:127777,OCDCAFATPc|FACOAL180,rxn37341|rxn37338|rxn37333|rxn37328|rxn09449|rxn08454,MNXR102141|MNXR99164,RXN-16380,HMR_2957|HMR_0249	6.2.1A2(rev)	Stearoyl-CoA	1467870680	C00412	CCCCCCCCCCCCCCCCCC(=O)SCCNC(=O)CCNC(=O)C(C(COP(=O)(OP(=O)(OCC1OC(C(C1OP(=O)(O)O)O)n1cnc2c1ncnc2N)O)O)(C)C)O	3,4-Didehydroadipyl-CoA	1468039539	C19682				O=C(NCCSC(=O)CC=CCC(=O)O)CCNC(=O)C(C(COP(=O)(OP(=O)(OCC1OC(C(C1OP(=O)(O)O)O)n1cnc2c1ncnc2N)O)O)(C)C)O	1
O95573	ACSL3_HUMAN	6.2.1.3	1569880463	46208|RHEA: 46209,Metrxn:127779,FACOAL200,rxn37339|rxn37334|rxn37329|rxn37325|rxn37323,MNXR128464,HMR_2966|HMR_0283	6.2.1A2(rev)	Eicosanoyl-CoA	1467885719	C02041	CCCCCCCCCCCCCCCCCCCC(=O)SCCNC(=O)CCNC(=O)C(C(COP(=O)(OP(=O)(OCC1OC(C(C1OP(=O)(O)O)O)n1cnc2c1ncnc2N)O)O)(C)C)O	Sulfoacetyl-CoA	1468039562	C19685				O=C(NCCSC(=O)CS(=O)(=O)O)CCNC(=O)C(C(COP(=O)(OP(=O)(OCC1OC(C(C1OP(=O)(O)O)O)n1cnc2c1ncnc2N)O)O)(C)C)O	1
O95573	ACSL3_HUMAN	6.2.1.3	1569880463	46208|RHEA: 46209,Metrxn:127779,FACOAL200,rxn37339|rxn37334|rxn37329|rxn37325|rxn37323,MNXR128464,HMR_2966|HMR_0283	6.2.1A2(rev)	Eicosanoyl-CoA	1467885719	C02041	CCCCCCCCCCCCCCCCCCCC(=O)SCCNC(=O)CCNC(=O)C(C(COP(=O)(OP(=O)(OCC1OC(C(C1OP(=O)(O)O)O)n1cnc2c1ncnc2N)O)O)(C)C)O	Fluoroacetyl-CoA	1468040266	C19775				FCC(=O)SCCNC(=O)CCNC(=O)C(C(COP(=O)(OP(=O)(OCC1OC(C(C1OP(=O)(O)O)O)n1cnc2c1ncnc2N)O)O)(C)C)O	1
O95573	ACSL3_HUMAN	6.2.1.3	1569818701	33615|RHEA: 33616,Metrxn:127777,OCDCAFATPc|FACOAL180,rxn37341|rxn37338|rxn37333|rxn37328|rxn09449|rxn08454,MNXR102141|MNXR99164,RXN-16380,HMR_2957|HMR_0249	6.2.1A2(rev)	Stearoyl-CoA	1467870680	C00412	CCCCCCCCCCCCCCCCCC(=O)SCCNC(=O)CCNC(=O)C(C(COP(=O)(OP(=O)(OCC1OC(C(C1OP(=O)(O)O)O)n1cnc2c1ncnc2N)O)O)(C)C)O	3,4-Didehydroadipyl-CoA semialdehyde	1468039547	C19683				O=CCC=CCC(=O)SCCNC(=O)CCNC(=O)C(C(COP(=O)(OP(=O)(OCC1OC(C(C1OP(=O)(O)O)O)n1cnc2c1ncnc2N)O)O)(C)C)O	1
O95573	ACSL3_HUMAN	6.2.1.3	1569880463	46208|RHEA: 46209,Metrxn:127779,FACOAL200,rxn37339|rxn37334|rxn37329|rxn37325|rxn37323,MNXR128464,HMR_2966|HMR_0283	6.2.1A2(rev)	Eicosanoyl-CoA	1467885719	C02041	CCCCCCCCCCCCCCCCCCCC(=O)SCCNC(=O)CCNC(=O)C(C(COP(=O)(OP(=O)(OCC1OC(C(C1OP(=O)(O)O)O)n1cnc2c1ncnc2N)O)O)(C)C)O	3-Oxo-5,6-dehydrosuberyl-CoA semialdehyde	1468041600	C19946				O=CCC=CCC(=O)CC(=O)SCCNC(=O)CCNC(=O)C(C(COP(=O)(OP(=O)(OCC1OC(C(C1OP(=O)(O)O)O)n1cnc2c1ncnc2N)O)O)(C)C)O	1
O95573	ACSL3_HUMAN	6.2.1.3	1569818701	33615|RHEA: 33616,Metrxn:127777,OCDCAFATPc|FACOAL180,rxn37341|rxn37338|rxn37333|rxn37328|rxn09449|rxn08454,MNXR102141|MNXR99164,RXN-16380,HMR_2957|HMR_0249	6.2.1A2(rev)	Stearoyl-CoA	1467870680	C00412	CCCCCCCCCCCCCCCCCC(=O)SCCNC(=O)CCNC(=O)C(C(COP(=O)(OP(=O)(OCC1OC(C(C1OP(=O)(O)O)O)n1cnc2c1ncnc2N)O)O)(C)C)O	2,3-Epoxy-2,3-dihydrobenzoyl-CoA	1468039555	C19684				O=C(NCCSC(=O)C1=CC=CC(C1O)O)CCNC(=O)C(C(COP(=O)(OP(=O)(OCC1OC(C(C1OP(=O)(O)O)O)n1cnc2c1ncnc2N)O)O)(C)C)O	1
O95573	ACSL3_HUMAN	6.2.1.3	1569880463	46208|RHEA: 46209,Metrxn:127779,FACOAL200,rxn37339|rxn37334|rxn37329|rxn37325|rxn37323,MNXR128464,HMR_2966|HMR_0283	6.2.1A2(rev)	Eicosanoyl-CoA	1467885719	C02041	CCCCCCCCCCCCCCCCCCCC(=O)SCCNC(=O)CCNC(=O)C(C(COP(=O)(OP(=O)(OCC1OC(C(C1OP(=O)(O)O)O)n1cnc2c1ncnc2N)O)O)(C)C)O	2-Oxepin-2(3H)-ylideneacetyl-CoA	1468041843	C19975				O=C(NCCSC(=O)C=C1CC=CC=CO1)CCNC(=O)C(C(COP(=O)(OP(=O)(OCC1OC(C(C1OP(=O)(O)O)O)n1cnc2c1ncnc2N)O)O)(C)C)O	1
O95573	ACSL3_HUMAN	6.2.1.3	1569818701	33615|RHEA: 33616,Metrxn:127777,OCDCAFATPc|FACOAL180,rxn37341|rxn37338|rxn37333|rxn37328|rxn09449|rxn08454,MNXR102141|MNXR99164,RXN-16380,HMR_2957|HMR_0249	6.2.1A2(rev)	Stearoyl-CoA	1467870680	C00412	CCCCCCCCCCCCCCCCCC(=O)SCCNC(=O)CCNC(=O)C(C(COP(=O)(OP(=O)(OCC1OC(C(C1OP(=O)(O)O)O)n1cnc2c1ncnc2N)O)O)(C)C)O	Sulfoacetyl-CoA	1468039562	C19685				O=C(NCCSC(=O)CS(=O)(=O)O)CCNC(=O)C(C(COP(=O)(OP(=O)(OCC1OC(C(C1OP(=O)(O)O)O)n1cnc2c1ncnc2N)O)O)(C)C)O	1
O95573	ACSL3_HUMAN	6.2.1.3	1569880463	46208|RHEA: 46209,Metrxn:127779,FACOAL200,rxn37339|rxn37334|rxn37329|rxn37325|rxn37323,MNXR128464,HMR_2966|HMR_0283	6.2.1A2(rev)	Eicosanoyl-CoA	1467885719	C02041	CCCCCCCCCCCCCCCCCCCC(=O)SCCNC(=O)CCNC(=O)C(C(COP(=O)(OP(=O)(OCC1OC(C(C1OP(=O)(O)O)O)n1cnc2c1ncnc2N)O)O)(C)C)O	2-(1,2-Epoxy-1,2-dihydrophenyl)acetyl-CoA	1468042578	C20062				O=C(NCCSC(=O)CC12C=CC=CC2O1)CCNC(=O)C(C(COP(=O)(OP(=O)(OCC1OC(C(C1OP(=O)(O)O)O)n1cnc2c1ncnc2N)O)O)(C)C)O	1
O95573	ACSL3_HUMAN	6.2.1.3	1569818701	33615|RHEA: 33616,Metrxn:127777,OCDCAFATPc|FACOAL180,rxn37341|rxn37338|rxn37333|rxn37328|rxn09449|rxn08454,MNXR102141|MNXR99164,RXN-16380,HMR_2957|HMR_0249	6.2.1A2(rev)	Stearoyl-CoA	1467870680	C00412	CCCCCCCCCCCCCCCCCC(=O)SCCNC(=O)CCNC(=O)C(C(COP(=O)(OP(=O)(OCC1OC(C(C1OP(=O)(O)O)O)n1cnc2c1ncnc2N)O)O)(C)C)O	Fluoroacetyl-CoA	1468040266	C19775				FCC(=O)SCCNC(=O)CCNC(=O)C(C(COP(=O)(OP(=O)(OCC1OC(C(C1OP(=O)(O)O)O)n1cnc2c1ncnc2N)O)O)(C)C)O	1
O95573	ACSL3_HUMAN	6.2.1.3	1569880463	46208|RHEA: 46209,Metrxn:127779,FACOAL200,rxn37339|rxn37334|rxn37329|rxn37325|rxn37323,MNXR128464,HMR_2966|HMR_0283	6.2.1A2(rev)	Eicosanoyl-CoA	1467885719	C02041	CCCCCCCCCCCCCCCCCCCC(=O)SCCNC(=O)CCNC(=O)C(C(COP(=O)(OP(=O)(OCC1OC(C(C1OP(=O)(O)O)O)n1cnc2c1ncnc2N)O)O)(C)C)O	[(2R)-3,3,4-Trimethyl-6-oxo-3,6-dihydro-1H-pyran-2-yl]acetyl-CoA	1468044530	C20321				O=C(NCCSC(=O)CC1OC(=O)C=C(C1(C)C)C)CCNC(=O)C(C(COP(=O)(OP(=O)(OCC1OC(C(C1OP(=O)(O)O)O)n1cnc2c1ncnc2N)O)O)(C)C)O	1
O95573	ACSL3_HUMAN	6.2.1.3	1569818701	33615|RHEA: 33616,Metrxn:127777,OCDCAFATPc|FACOAL180,rxn37341|rxn37338|rxn37333|rxn37328|rxn09449|rxn08454,MNXR102141|MNXR99164,RXN-16380,HMR_2957|HMR_0249	6.2.1A2(rev)	Stearoyl-CoA	1467870680	C00412	CCCCCCCCCCCCCCCCCC(=O)SCCNC(=O)CCNC(=O)C(C(COP(=O)(OP(=O)(OCC1OC(C(C1OP(=O)(O)O)O)n1cnc2c1ncnc2N)O)O)(C)C)O	3-Oxo-5,6-dehydrosuberyl-CoA semialdehyde	1468041600	C19946				O=CCC=CCC(=O)CC(=O)SCCNC(=O)CCNC(=O)C(C(COP(=O)(OP(=O)(OCC1OC(C(C1OP(=O)(O)O)O)n1cnc2c1ncnc2N)O)O)(C)C)O	1
O95573	ACSL3_HUMAN	6.2.1.3	1569880463	46208|RHEA: 46209,Metrxn:127779,FACOAL200,rxn37339|rxn37334|rxn37329|rxn37325|rxn37323,MNXR128464,HMR_2966|HMR_0283	6.2.1A2(rev)	Eicosanoyl-CoA	1467885719	C02041	CCCCCCCCCCCCCCCCCCCC(=O)SCCNC(=O)CCNC(=O)C(C(COP(=O)(OP(=O)(OCC1OC(C(C1OP(=O)(O)O)O)n1cnc2c1ncnc2N)O)O)(C)C)O	3,5,7-Trioxododecanoyl-CoA	1468045222	C20413				CCCCCC(=O)CC(=O)CC(=O)CC(=O)SCCNC(=O)CCNC(=O)C(C(COP(=O)(OP(=O)(OCC1OC(C(C1OP(=O)(O)O)O)n1cnc2c1ncnc2N)O)O)(C)C)O	1
O95573	ACSL3_HUMAN	6.2.1.3	1569818701	33615|RHEA: 33616,Metrxn:127777,OCDCAFATPc|FACOAL180,rxn37341|rxn37338|rxn37333|rxn37328|rxn09449|rxn08454,MNXR102141|MNXR99164,RXN-16380,HMR_2957|HMR_0249	6.2.1A2(rev)	Stearoyl-CoA	1467870680	C00412	CCCCCCCCCCCCCCCCCC(=O)SCCNC(=O)CCNC(=O)C(C(COP(=O)(OP(=O)(OCC1OC(C(C1OP(=O)(O)O)O)n1cnc2c1ncnc2N)O)O)(C)C)O	2-Oxepin-2(3H)-ylideneacetyl-CoA	1468041843	C19975				O=C(NCCSC(=O)C=C1CC=CC=CO1)CCNC(=O)C(C(COP(=O)(OP(=O)(OCC1OC(C(C1OP(=O)(O)O)O)n1cnc2c1ncnc2N)O)O)(C)C)O	1
O95573	ACSL3_HUMAN	6.2.1.3	1569880463	46208|RHEA: 46209,Metrxn:127779,FACOAL200,rxn37339|rxn37334|rxn37329|rxn37325|rxn37323,MNXR128464,HMR_2966|HMR_0283	6.2.1A2(rev)	Eicosanoyl-CoA	1467885719	C02041	CCCCCCCCCCCCCCCCCCCC(=O)SCCNC(=O)CCNC(=O)C(C(COP(=O)(OP(=O)(OCC1OC(C(C1OP(=O)(O)O)O)n1cnc2c1ncnc2N)O)O)(C)C)O	2-Oxoglutaryl-CoA	1468045484	C20447				O=C(NCCSC(=O)C(=O)CCC(=O)O)CCNC(=O)C(C(COP(=O)(OP(=O)(OCC1OC(C(C1OP(=O)(O)O)O)n1cnc2c1ncnc2N)O)O)(C)C)O	1
O95573	ACSL3_HUMAN	6.2.1.3	1569818701	33615|RHEA: 33616,Metrxn:127777,OCDCAFATPc|FACOAL180,rxn37341|rxn37338|rxn37333|rxn37328|rxn09449|rxn08454,MNXR102141|MNXR99164,RXN-16380,HMR_2957|HMR_0249	6.2.1A2(rev)	Stearoyl-CoA	1467870680	C00412	CCCCCCCCCCCCCCCCCC(=O)SCCNC(=O)CCNC(=O)C(C(COP(=O)(OP(=O)(OCC1OC(C(C1OP(=O)(O)O)O)n1cnc2c1ncnc2N)O)O)(C)C)O	2-(1,2-Epoxy-1,2-dihydrophenyl)acetyl-CoA	1468042578	C20062				O=C(NCCSC(=O)CC12C=CC=CC2O1)CCNC(=O)C(C(COP(=O)(OP(=O)(OCC1OC(C(C1OP(=O)(O)O)O)n1cnc2c1ncnc2N)O)O)(C)C)O	1
O95573	ACSL3_HUMAN	6.2.1.3	1569880463	46208|RHEA: 46209,Metrxn:127779,FACOAL200,rxn37339|rxn37334|rxn37329|rxn37325|rxn37323,MNXR128464,HMR_2966|HMR_0283	6.2.1A2(rev)	Eicosanoyl-CoA	1467885719	C02041	CCCCCCCCCCCCCCCCCCCC(=O)SCCNC(=O)CCNC(=O)C(C(COP(=O)(OP(=O)(OCC1OC(C(C1OP(=O)(O)O)O)n1cnc2c1ncnc2N)O)O)(C)C)O	(E)-4-(Trimethylammonio)but-2-enoyl-CoA	1468047606	C20748				O=C(NCCSC(=O)C=CC[N+](C)(C)C)CCNC(=O)C(C(COP(=O)(OP(=O)(OCC1OC(C(C1OP(=O)(O)O)O)n1cnc2c1ncnc2N)O)O)(C)C)O	1
O95573	ACSL3_HUMAN	6.2.1.3	1569818701	33615|RHEA: 33616,Metrxn:127777,OCDCAFATPc|FACOAL180,rxn37341|rxn37338|rxn37333|rxn37328|rxn09449|rxn08454,MNXR102141|MNXR99164,RXN-16380,HMR_2957|HMR_0249	6.2.1A2(rev)	Stearoyl-CoA	1467870680	C00412	CCCCCCCCCCCCCCCCCC(=O)SCCNC(=O)CCNC(=O)C(C(COP(=O)(OP(=O)(OCC1OC(C(C1OP(=O)(O)O)O)n1cnc2c1ncnc2N)O)O)(C)C)O	[(2R)-3,3,4-Trimethyl-6-oxo-3,6-dihydro-1H-pyran-2-yl]acetyl-CoA	1468044530	C20321				O=C(NCCSC(=O)CC1OC(=O)C=C(C1(C)C)C)CCNC(=O)C(C(COP(=O)(OP(=O)(OCC1OC(C(C1OP(=O)(O)O)O)n1cnc2c1ncnc2N)O)O)(C)C)O	1
O95573	ACSL3_HUMAN	6.2.1.3	1569880463	46208|RHEA: 46209,Metrxn:127779,FACOAL200,rxn37339|rxn37334|rxn37329|rxn37325|rxn37323,MNXR128464,HMR_2966|HMR_0283	6.2.1A2(rev)	Eicosanoyl-CoA	1467885719	C02041	CCCCCCCCCCCCCCCCCCCC(=O)SCCNC(=O)CCNC(=O)C(C(COP(=O)(OP(=O)(OCC1OC(C(C1OP(=O)(O)O)O)n1cnc2c1ncnc2N)O)O)(C)C)O	4-Trimethylammoniobutanoyl-CoA	1468047614	C20749				O=C(NCCSC(=O)CCC[N+](C)(C)C)CCNC(=O)C(C(COP(=O)(OP(=O)(OCC1OC(C(C1OP(=O)(O)O)O)n1cnc2c1ncnc2N)O)O)(C)C)O	1
O95573	ACSL3_HUMAN	6.2.1.3	1569818701	33615|RHEA: 33616,Metrxn:127777,OCDCAFATPc|FACOAL180,rxn37341|rxn37338|rxn37333|rxn37328|rxn09449|rxn08454,MNXR102141|MNXR99164,RXN-16380,HMR_2957|HMR_0249	6.2.1A2(rev)	Stearoyl-CoA	1467870680	C00412	CCCCCCCCCCCCCCCCCC(=O)SCCNC(=O)CCNC(=O)C(C(COP(=O)(OP(=O)(OCC1OC(C(C1OP(=O)(O)O)O)n1cnc2c1ncnc2N)O)O)(C)C)O	3,5,7-Trioxododecanoyl-CoA	1468045222	C20413				CCCCCC(=O)CC(=O)CC(=O)CC(=O)SCCNC(=O)CCNC(=O)C(C(COP(=O)(OP(=O)(OCC1OC(C(C1OP(=O)(O)O)O)n1cnc2c1ncnc2N)O)O)(C)C)O	1
O95573	ACSL3_HUMAN	6.2.1.3	1569880463	46208|RHEA: 46209,Metrxn:127779,FACOAL200,rxn37339|rxn37334|rxn37329|rxn37325|rxn37323,MNXR128464,HMR_2966|HMR_0283	6.2.1A2(rev)	Eicosanoyl-CoA	1467885719	C02041	CCCCCCCCCCCCCCCCCCCC(=O)SCCNC(=O)CCNC(=O)C(C(COP(=O)(OP(=O)(OCC1OC(C(C1OP(=O)(O)O)O)n1cnc2c1ncnc2N)O)O)(C)C)O	3-[(3aS,4S,7aS)-7a-Methyl-1,5-dioxo-octahydro-1H-inden-4-yl]propanoyl-CoA	1468048273	C20838				O=C(NCCSC(=O)CCC1C(=O)CCC2(C1CCC2=O)C)CCNC(=O)C(C(COP(=O)(OP(=O)(OCC1OC(C(C1OP(=O)(O)O)O)n1cnc2c1ncnc2N)O)O)(C)C)O	1
O95573	ACSL3_HUMAN	6.2.1.3	1569818701	33615|RHEA: 33616,Metrxn:127777,OCDCAFATPc|FACOAL180,rxn37341|rxn37338|rxn37333|rxn37328|rxn09449|rxn08454,MNXR102141|MNXR99164,RXN-16380,HMR_2957|HMR_0249	6.2.1A2(rev)	Stearoyl-CoA	1467870680	C00412	CCCCCCCCCCCCCCCCCC(=O)SCCNC(=O)CCNC(=O)C(C(COP(=O)(OP(=O)(OCC1OC(C(C1OP(=O)(O)O)O)n1cnc2c1ncnc2N)O)O)(C)C)O	2-Oxoglutaryl-CoA	1468045484	C20447				O=C(NCCSC(=O)C(=O)CCC(=O)O)CCNC(=O)C(C(COP(=O)(OP(=O)(OCC1OC(C(C1OP(=O)(O)O)O)n1cnc2c1ncnc2N)O)O)(C)C)O	1
O95573	ACSL3_HUMAN	6.2.1.3	1569880463	46208|RHEA: 46209,Metrxn:127779,FACOAL200,rxn37339|rxn37334|rxn37329|rxn37325|rxn37323,MNXR128464,HMR_2966|HMR_0283	6.2.1A2(rev)	Eicosanoyl-CoA	1467885719	C02041	CCCCCCCCCCCCCCCCCCCC(=O)SCCNC(=O)CCNC(=O)C(C(COP(=O)(OP(=O)(OCC1OC(C(C1OP(=O)(O)O)O)n1cnc2c1ncnc2N)O)O)(C)C)O	2-Hydroxy-7-methoxy-5-methyl-1-naphthoyl-CoA	1468048308	C20842				COc1cc(C)c2c(c1)c(C(=O)SCCNC(=O)CCNC(=O)C(C(COP(=O)(OP(=O)(OCC1OC(C(C1OP(=O)(O)O)O)n1cnc3c1ncnc3N)O)O)(C)C)O)c(cc2)O	1
O95573	ACSL3_HUMAN	6.2.1.3	1569818701	33615|RHEA: 33616,Metrxn:127777,OCDCAFATPc|FACOAL180,rxn37341|rxn37338|rxn37333|rxn37328|rxn09449|rxn08454,MNXR102141|MNXR99164,RXN-16380,HMR_2957|HMR_0249	6.2.1A2(rev)	Stearoyl-CoA	1467870680	C00412	CCCCCCCCCCCCCCCCCC(=O)SCCNC(=O)CCNC(=O)C(C(COP(=O)(OP(=O)(OCC1OC(C(C1OP(=O)(O)O)O)n1cnc2c1ncnc2N)O)O)(C)C)O	(E)-4-(Trimethylammonio)but-2-enoyl-CoA	1468047606	C20748				O=C(NCCSC(=O)C=CC[N+](C)(C)C)CCNC(=O)C(C(COP(=O)(OP(=O)(OCC1OC(C(C1OP(=O)(O)O)O)n1cnc2c1ncnc2N)O)O)(C)C)O	1
O95573	ACSL3_HUMAN	6.2.1.3	1569880463	46208|RHEA: 46209,Metrxn:127779,FACOAL200,rxn37339|rxn37334|rxn37329|rxn37325|rxn37323,MNXR128464,HMR_2966|HMR_0283	6.2.1A2(rev)	Eicosanoyl-CoA	1467885719	C02041	CCCCCCCCCCCCCCCCCCCC(=O)SCCNC(=O)CCNC(=O)C(C(COP(=O)(OP(=O)(OCC1OC(C(C1OP(=O)(O)O)O)n1cnc2c1ncnc2N)O)O)(C)C)O	3-(Methylthio)propanoyl-CoA	1468048522	C20870				CSCCC(=O)SCCNC(=O)CCNC(=O)C(C(COP(=O)(OP(=O)(OCC1OC(C(C1OP(=O)(O)O)O)n1cnc2c1ncnc2N)O)O)(C)C)O	1
O95573	ACSL3_HUMAN	6.2.1.3	1569818701	33615|RHEA: 33616,Metrxn:127777,OCDCAFATPc|FACOAL180,rxn37341|rxn37338|rxn37333|rxn37328|rxn09449|rxn08454,MNXR102141|MNXR99164,RXN-16380,HMR_2957|HMR_0249	6.2.1A2(rev)	Stearoyl-CoA	1467870680	C00412	CCCCCCCCCCCCCCCCCC(=O)SCCNC(=O)CCNC(=O)C(C(COP(=O)(OP(=O)(OCC1OC(C(C1OP(=O)(O)O)O)n1cnc2c1ncnc2N)O)O)(C)C)O	4-Trimethylammoniobutanoyl-CoA	1468047614	C20749				O=C(NCCSC(=O)CCC[N+](C)(C)C)CCNC(=O)C(C(COP(=O)(OP(=O)(OCC1OC(C(C1OP(=O)(O)O)O)n1cnc2c1ncnc2N)O)O)(C)C)O	1
O95573	ACSL3_HUMAN	6.2.1.3	1569880463	46208|RHEA: 46209,Metrxn:127779,FACOAL200,rxn37339|rxn37334|rxn37329|rxn37325|rxn37323,MNXR128464,HMR_2966|HMR_0283	6.2.1A2(rev)	Eicosanoyl-CoA	1467885719	C02041	CCCCCCCCCCCCCCCCCCCC(=O)SCCNC(=O)CCNC(=O)C(C(COP(=O)(OP(=O)(OCC1OC(C(C1OP(=O)(O)O)O)n1cnc2c1ncnc2N)O)O)(C)C)O	(Z)-Icos-5-enoyl-CoA	1468049085	C20947				CCCCCCCCCCCCCCC=CCCCC(=O)SCCNC(=O)CCNC(=O)C(C(COP(=O)(OP(=O)(OCC1OC(C(C1OP(=O)(O)O)O)n1cnc2c1ncnc2N)O)O)(C)C)O	1
O95573	ACSL3_HUMAN	6.2.1.3	1569818701	33615|RHEA: 33616,Metrxn:127777,OCDCAFATPc|FACOAL180,rxn37341|rxn37338|rxn37333|rxn37328|rxn09449|rxn08454,MNXR102141|MNXR99164,RXN-16380,HMR_2957|HMR_0249	6.2.1A2(rev)	Stearoyl-CoA	1467870680	C00412	CCCCCCCCCCCCCCCCCC(=O)SCCNC(=O)CCNC(=O)C(C(COP(=O)(OP(=O)(OCC1OC(C(C1OP(=O)(O)O)O)n1cnc2c1ncnc2N)O)O)(C)C)O	3-[(3aS,4S,7aS)-7a-Methyl-1,5-dioxo-octahydro-1H-inden-4-yl]propanoyl-CoA	1468048273	C20838				O=C(NCCSC(=O)CCC1C(=O)CCC2(C1CCC2=O)C)CCNC(=O)C(C(COP(=O)(OP(=O)(OCC1OC(C(C1OP(=O)(O)O)O)n1cnc2c1ncnc2N)O)O)(C)C)O	1
O95573	ACSL3_HUMAN	6.2.1.3	1569880463	46208|RHEA: 46209,Metrxn:127779,FACOAL200,rxn37339|rxn37334|rxn37329|rxn37325|rxn37323,MNXR128464,HMR_2966|HMR_0283	6.2.1A2(rev)	Eicosanoyl-CoA	1467885719	C02041	CCCCCCCCCCCCCCCCCCCC(=O)SCCNC(=O)CCNC(=O)C(C(COP(=O)(OP(=O)(OCC1OC(C(C1OP(=O)(O)O)O)n1cnc2c1ncnc2N)O)O)(C)C)O	3-(Methylthio)acryloyl-CoA	1468049134	C20955				CSC=CC(=O)SCCNC(=O)CCNC(=O)C(C(COP(=O)(OP(=O)(OCC1OC(C(C1OP(=O)(O)O)O)n1cnc2c1ncnc2N)O)O)(C)C)O	1
O95573	ACSL3_HUMAN	6.2.1.3	1569818701	33615|RHEA: 33616,Metrxn:127777,OCDCAFATPc|FACOAL180,rxn37341|rxn37338|rxn37333|rxn37328|rxn09449|rxn08454,MNXR102141|MNXR99164,RXN-16380,HMR_2957|HMR_0249	6.2.1A2(rev)	Stearoyl-CoA	1467870680	C00412	CCCCCCCCCCCCCCCCCC(=O)SCCNC(=O)CCNC(=O)C(C(COP(=O)(OP(=O)(OCC1OC(C(C1OP(=O)(O)O)O)n1cnc2c1ncnc2N)O)O)(C)C)O	2-Hydroxy-7-methoxy-5-methyl-1-naphthoyl-CoA	1468048308	C20842				COc1cc(C)c2c(c1)c(C(=O)SCCNC(=O)CCNC(=O)C(C(COP(=O)(OP(=O)(OCC1OC(C(C1OP(=O)(O)O)O)n1cnc3c1ncnc3N)O)O)(C)C)O)c(cc2)O	1
O95573	ACSL3_HUMAN	6.2.1.3	1569880463	46208|RHEA: 46209,Metrxn:127779,FACOAL200,rxn37339|rxn37334|rxn37329|rxn37325|rxn37323,MNXR128464,HMR_2966|HMR_0283	6.2.1A2(rev)	Eicosanoyl-CoA	1467885719	C02041	CCCCCCCCCCCCCCCCCCCC(=O)SCCNC(=O)CCNC(=O)C(C(COP(=O)(OP(=O)(OCC1OC(C(C1OP(=O)(O)O)O)n1cnc2c1ncnc2N)O)O)(C)C)O	3-Hydroxy-3-(methylthio)propanoyl-CoA	1468049221	C20968				CSC(CC(=O)SCCNC(=O)CCNC(=O)C(C(COP(=O)(OP(=O)(OCC1OC(C(C1OP(=O)(O)O)O)n1cnc2c1ncnc2N)O)O)(C)C)O)O	1
O95573	ACSL3_HUMAN	6.2.1.3	1569818701	33615|RHEA: 33616,Metrxn:127777,OCDCAFATPc|FACOAL180,rxn37341|rxn37338|rxn37333|rxn37328|rxn09449|rxn08454,MNXR102141|MNXR99164,RXN-16380,HMR_2957|HMR_0249	6.2.1A2(rev)	Stearoyl-CoA	1467870680	C00412	CCCCCCCCCCCCCCCCCC(=O)SCCNC(=O)CCNC(=O)C(C(COP(=O)(OP(=O)(OCC1OC(C(C1OP(=O)(O)O)O)n1cnc2c1ncnc2N)O)O)(C)C)O	3-(Methylthio)propanoyl-CoA	1468048522	C20870				CSCCC(=O)SCCNC(=O)CCNC(=O)C(C(COP(=O)(OP(=O)(OCC1OC(C(C1OP(=O)(O)O)O)n1cnc2c1ncnc2N)O)O)(C)C)O	1
O95573	ACSL3_HUMAN	6.2.1.3	1569880463	46208|RHEA: 46209,Metrxn:127779,FACOAL200,rxn37339|rxn37334|rxn37329|rxn37325|rxn37323,MNXR128464,HMR_2966|HMR_0283	6.2.1A2(rev)	Eicosanoyl-CoA	1467885719	C02041	CCCCCCCCCCCCCCCCCCCC(=O)SCCNC(=O)CCNC(=O)C(C(COP(=O)(OP(=O)(OCC1OC(C(C1OP(=O)(O)O)O)n1cnc2c1ncnc2N)O)O)(C)C)O	3-Sulfinopropanoyl-CoA	1468049359	C20987				O=C(NCCSC(=O)CCS(=O)O)CCNC(=O)C(C(COP(=O)(OP(=O)(OCC1OC(C(C1OP(=O)(O)O)O)n1cnc2c1ncnc2N)O)O)(C)C)O	1
O95573	ACSL3_HUMAN	6.2.1.3	1569880463	46208|RHEA: 46209,Metrxn:127779,FACOAL200,rxn37339|rxn37334|rxn37329|rxn37325|rxn37323,MNXR128464,HMR_2966|HMR_0283	6.2.1A2(rev)	Eicosanoyl-CoA	1467885719	C02041	CCCCCCCCCCCCCCCCCCCC(=O)SCCNC(=O)CCNC(=O)C(C(COP(=O)(OP(=O)(OCC1OC(C(C1OP(=O)(O)O)O)n1cnc2c1ncnc2N)O)O)(C)C)O	(14E)-Hexadec-14-enoyl-CoA	1468049418	C20996,C20997				CC=CCCCCCCCCCCCCC(=O)SCCNC(=O)CCNC(=O)C(C(COP(=O)(OP(=O)(OCC1OC(C(C1OP(=O)(O)O)O)n1cnc2c1ncnc2N)O)O)(C)C)O	1
O95573	ACSL3_HUMAN	6.2.1.3	1569818701	33615|RHEA: 33616,Metrxn:127777,OCDCAFATPc|FACOAL180,rxn37341|rxn37338|rxn37333|rxn37328|rxn09449|rxn08454,MNXR102141|MNXR99164,RXN-16380,HMR_2957|HMR_0249	6.2.1A2(rev)	Stearoyl-CoA	1467870680	C00412	CCCCCCCCCCCCCCCCCC(=O)SCCNC(=O)CCNC(=O)C(C(COP(=O)(OP(=O)(OCC1OC(C(C1OP(=O)(O)O)O)n1cnc2c1ncnc2N)O)O)(C)C)O	(Z)-Icos-5-enoyl-CoA	1468049085	C20947				CCCCCCCCCCCCCCC=CCCCC(=O)SCCNC(=O)CCNC(=O)C(C(COP(=O)(OP(=O)(OCC1OC(C(C1OP(=O)(O)O)O)n1cnc2c1ncnc2N)O)O)(C)C)O	1
O95573	ACSL3_HUMAN	6.2.1.3	1569880463	46208|RHEA: 46209,Metrxn:127779,FACOAL200,rxn37339|rxn37334|rxn37329|rxn37325|rxn37323,MNXR128464,HMR_2966|HMR_0283	6.2.1A2(rev)	Eicosanoyl-CoA	1467885719	C02041	CCCCCCCCCCCCCCCCCCCC(=O)SCCNC(=O)CCNC(=O)C(C(COP(=O)(OP(=O)(OCC1OC(C(C1OP(=O)(O)O)O)n1cnc2c1ncnc2N)O)O)(C)C)O	(11Z)-Hexadec-11-enoyl-CoA	1468049432	C20998				CCCCC=CCCCCCCCCCC(=O)SCCNC(=O)CCNC(=O)C(C(COP(=O)(OP(=O)(OCC1OC(C(C1OP(=O)(O)O)O)n1cnc2c1ncnc2N)O)O)(C)C)O	1
O95573	ACSL3_HUMAN	6.2.1.3	1569818701	33615|RHEA: 33616,Metrxn:127777,OCDCAFATPc|FACOAL180,rxn37341|rxn37338|rxn37333|rxn37328|rxn09449|rxn08454,MNXR102141|MNXR99164,RXN-16380,HMR_2957|HMR_0249	6.2.1A2(rev)	Stearoyl-CoA	1467870680	C00412	CCCCCCCCCCCCCCCCCC(=O)SCCNC(=O)CCNC(=O)C(C(COP(=O)(OP(=O)(OCC1OC(C(C1OP(=O)(O)O)O)n1cnc2c1ncnc2N)O)O)(C)C)O	3-(Methylthio)acryloyl-CoA	1468049134	C20955				CSC=CC(=O)SCCNC(=O)CCNC(=O)C(C(COP(=O)(OP(=O)(OCC1OC(C(C1OP(=O)(O)O)O)n1cnc2c1ncnc2N)O)O)(C)C)O	1
O95573	ACSL3_HUMAN	6.2.1.3	1569880463	46208|RHEA: 46209,Metrxn:127779,FACOAL200,rxn37339|rxn37334|rxn37329|rxn37325|rxn37323,MNXR128464,HMR_2966|HMR_0283	6.2.1A2(rev)	Eicosanoyl-CoA	1467885719	C02041	CCCCCCCCCCCCCCCCCCCC(=O)SCCNC(=O)CCNC(=O)C(C(COP(=O)(OP(=O)(OCC1OC(C(C1OP(=O)(O)O)O)n1cnc2c1ncnc2N)O)O)(C)C)O	(10E,12Z)-Hexadeca-10,12-dienoyl-CoA	1468049439	C20999				CCCC=CC=CCCCCCCCCC(=O)SCCNC(=O)CCNC(=O)C(C(COP(=O)(OP(=O)(OCC1OC(C(C1OP(=O)(O)O)O)n1cnc2c1ncnc2N)O)O)(C)C)O	1
O95573	ACSL3_HUMAN	6.2.1.3	1569818701	33615|RHEA: 33616,Metrxn:127777,OCDCAFATPc|FACOAL180,rxn37341|rxn37338|rxn37333|rxn37328|rxn09449|rxn08454,MNXR102141|MNXR99164,RXN-16380,HMR_2957|HMR_0249	6.2.1A2(rev)	Stearoyl-CoA	1467870680	C00412	CCCCCCCCCCCCCCCCCC(=O)SCCNC(=O)CCNC(=O)C(C(COP(=O)(OP(=O)(OCC1OC(C(C1OP(=O)(O)O)O)n1cnc2c1ncnc2N)O)O)(C)C)O	3-Hydroxy-3-(methylthio)propanoyl-CoA	1468049221	C20968				CSC(CC(=O)SCCNC(=O)CCNC(=O)C(C(COP(=O)(OP(=O)(OCC1OC(C(C1OP(=O)(O)O)O)n1cnc2c1ncnc2N)O)O)(C)C)O)O	1
O95573	ACSL3_HUMAN	6.2.1.3	1569880463	46208|RHEA: 46209,Metrxn:127779,FACOAL200,rxn37339|rxn37334|rxn37329|rxn37325|rxn37323,MNXR128464,HMR_2966|HMR_0283	6.2.1A2(rev)	Eicosanoyl-CoA	1467885719	C02041	CCCCCCCCCCCCCCCCCCCC(=O)SCCNC(=O)CCNC(=O)C(C(COP(=O)(OP(=O)(OCC1OC(C(C1OP(=O)(O)O)O)n1cnc2c1ncnc2N)O)O)(C)C)O	(9Z,12Z)-Hexadeca-9,12-dienoyl-CoA	1468049446	C21000				CCCC=CCC=CCCCCCCCC(=O)SCCNC(=O)CCNC(=O)C(C(COP(=O)(OP(=O)(OCC1OC(C(C1OP(=O)(O)O)O)n1cnc2c1ncnc2N)O)O)(C)C)O	1
O95573	ACSL3_HUMAN	6.2.1.3	1569818701	33615|RHEA: 33616,Metrxn:127777,OCDCAFATPc|FACOAL180,rxn37341|rxn37338|rxn37333|rxn37328|rxn09449|rxn08454,MNXR102141|MNXR99164,RXN-16380,HMR_2957|HMR_0249	6.2.1A2(rev)	Stearoyl-CoA	1467870680	C00412	CCCCCCCCCCCCCCCCCC(=O)SCCNC(=O)CCNC(=O)C(C(COP(=O)(OP(=O)(OCC1OC(C(C1OP(=O)(O)O)O)n1cnc2c1ncnc2N)O)O)(C)C)O	3-Sulfinopropanoyl-CoA	1468049359	C20987				O=C(NCCSC(=O)CCS(=O)O)CCNC(=O)C(C(COP(=O)(OP(=O)(OCC1OC(C(C1OP(=O)(O)O)O)n1cnc2c1ncnc2N)O)O)(C)C)O	1
O95573	ACSL3_HUMAN	6.2.1.3	1569880463	46208|RHEA: 46209,Metrxn:127779,FACOAL200,rxn37339|rxn37334|rxn37329|rxn37325|rxn37323,MNXR128464,HMR_2966|HMR_0283	6.2.1A2(rev)	Eicosanoyl-CoA	1467885719	C02041	CCCCCCCCCCCCCCCCCCCC(=O)SCCNC(=O)CCNC(=O)C(C(COP(=O)(OP(=O)(OCC1OC(C(C1OP(=O)(O)O)O)n1cnc2c1ncnc2N)O)O)(C)C)O	18-Hydroxyoleoyl-CoA	1468049482	C21005				OCCCCCCCCC=CCCCCCCCC(=O)SCCNC(=O)CCNC(=O)C(C(COP(=O)(OP(=O)(OCC1OC(C(C1OP(=O)(O)O)O)n1cnc2c1ncnc2N)O)O)(C)C)O	1
O95573	ACSL3_HUMAN	6.2.1.3	1569880463	46208|RHEA: 46209,Metrxn:127779,FACOAL200,rxn37339|rxn37334|rxn37329|rxn37325|rxn37323,MNXR128464,HMR_2966|HMR_0283	6.2.1A2(rev)	Eicosanoyl-CoA	1467885719	C02041	CCCCCCCCCCCCCCCCCCCC(=O)SCCNC(=O)CCNC(=O)C(C(COP(=O)(OP(=O)(OCC1OC(C(C1OP(=O)(O)O)O)n1cnc2c1ncnc2N)O)O)(C)C)O	18-Hydroxylinoleoyl-CoA	1468049489	C21006				OCCCCCC=CCC=CCCCCCCCC(=O)SCCNC(=O)CCNC(=O)C(C(COP(=O)(OP(=O)(OCC1OC(C(C1OP(=O)(O)O)O)n1cnc2c1ncnc2N)O)O)(C)C)O	1
O95573	ACSL3_HUMAN	6.2.1.3	1569818701	33615|RHEA: 33616,Metrxn:127777,OCDCAFATPc|FACOAL180,rxn37341|rxn37338|rxn37333|rxn37328|rxn09449|rxn08454,MNXR102141|MNXR99164,RXN-16380,HMR_2957|HMR_0249	6.2.1A2(rev)	Stearoyl-CoA	1467870680	C00412	CCCCCCCCCCCCCCCCCC(=O)SCCNC(=O)CCNC(=O)C(C(COP(=O)(OP(=O)(OCC1OC(C(C1OP(=O)(O)O)O)n1cnc2c1ncnc2N)O)O)(C)C)O	(14E)-Hexadec-14-enoyl-CoA	1468049418	C20996,C20997				CC=CCCCCCCCCCCCCC(=O)SCCNC(=O)CCNC(=O)C(C(COP(=O)(OP(=O)(OCC1OC(C(C1OP(=O)(O)O)O)n1cnc2c1ncnc2N)O)O)(C)C)O	1
O95573	ACSL3_HUMAN	6.2.1.3	1569880463	46208|RHEA: 46209,Metrxn:127779,FACOAL200,rxn37339|rxn37334|rxn37329|rxn37325|rxn37323,MNXR128464,HMR_2966|HMR_0283	6.2.1A2(rev)	Eicosanoyl-CoA	1467885719	C02041	CCCCCCCCCCCCCCCCCCCC(=O)SCCNC(=O)CCNC(=O)C(C(COP(=O)(OP(=O)(OCC1OC(C(C1OP(=O)(O)O)O)n1cnc2c1ncnc2N)O)O)(C)C)O	Palmitoleoyl-CoA	1468050008	C21072			FDB023321|	CCCCCCC=CCCCCCCCC(=O)SCCNC(=O)CCNC(=O)C(C(COP(=O)(OP(=O)(OCC1OC(C(C1OP(=O)(O)O)O)n1cnc2c1ncnc2N)O)O)(C)C)O	1
O95573	ACSL3_HUMAN	6.2.1.3	1569818701	33615|RHEA: 33616,Metrxn:127777,OCDCAFATPc|FACOAL180,rxn37341|rxn37338|rxn37333|rxn37328|rxn09449|rxn08454,MNXR102141|MNXR99164,RXN-16380,HMR_2957|HMR_0249	6.2.1A2(rev)	Stearoyl-CoA	1467870680	C00412	CCCCCCCCCCCCCCCCCC(=O)SCCNC(=O)CCNC(=O)C(C(COP(=O)(OP(=O)(OCC1OC(C(C1OP(=O)(O)O)O)n1cnc2c1ncnc2N)O)O)(C)C)O	(11Z)-Hexadec-11-enoyl-CoA	1468049432	C20998				CCCCC=CCCCCCCCCCC(=O)SCCNC(=O)CCNC(=O)C(C(COP(=O)(OP(=O)(OCC1OC(C(C1OP(=O)(O)O)O)n1cnc2c1ncnc2N)O)O)(C)C)O	1
O95573	ACSL3_HUMAN	6.2.1.3	1569880463	46208|RHEA: 46209,Metrxn:127779,FACOAL200,rxn37339|rxn37334|rxn37329|rxn37325|rxn37323,MNXR128464,HMR_2966|HMR_0283	6.2.1A2(rev)	Eicosanoyl-CoA	1467885719	C02041	CCCCCCCCCCCCCCCCCCCC(=O)SCCNC(=O)CCNC(=O)C(C(COP(=O)(OP(=O)(OCC1OC(C(C1OP(=O)(O)O)O)n1cnc2c1ncnc2N)O)O)(C)C)O	Gentisyl-CoA	1468050080	C21081				O=C(NCCSC(=O)c1cc(O)ccc1O)CCNC(=O)C(C(COP(=O)(OP(=O)(OCC1OC(C(C1OP(=O)(O)O)O)n1cnc2c1ncnc2N)O)O)(C)C)O	1
O95573	ACSL3_HUMAN	6.2.1.3	1569880463	46208|RHEA: 46209,Metrxn:127779,FACOAL200,rxn37339|rxn37334|rxn37329|rxn37325|rxn37323,MNXR128464,HMR_2966|HMR_0283	6.2.1A2(rev)	Eicosanoyl-CoA	1467885719	C02041	CCCCCCCCCCCCCCCCCCCC(=O)SCCNC(=O)CCNC(=O)C(C(COP(=O)(OP(=O)(OCC1OC(C(C1OP(=O)(O)O)O)n1cnc2c1ncnc2N)O)O)(C)C)O	(5Z,11Z,14Z)-Icosa-5,11,14-trienoyl-CoA	1468050088	C21082				CCCCCC=CCC=CCCCCC=CCCCC(=O)SCCNC(=O)CCNC(=O)C(C(COP(=O)(OP(=O)(OCC1OC(C(C1OP(=O)(O)O)O)n1cnc2c1ncnc2N)O)O)(C)C)O	1
O95573	ACSL3_HUMAN	6.2.1.3	1569818701	33615|RHEA: 33616,Metrxn:127777,OCDCAFATPc|FACOAL180,rxn37341|rxn37338|rxn37333|rxn37328|rxn09449|rxn08454,MNXR102141|MNXR99164,RXN-16380,HMR_2957|HMR_0249	6.2.1A2(rev)	Stearoyl-CoA	1467870680	C00412	CCCCCCCCCCCCCCCCCC(=O)SCCNC(=O)CCNC(=O)C(C(COP(=O)(OP(=O)(OCC1OC(C(C1OP(=O)(O)O)O)n1cnc2c1ncnc2N)O)O)(C)C)O	(10E,12Z)-Hexadeca-10,12-dienoyl-CoA	1468049439	C20999				CCCC=CC=CCCCCCCCCC(=O)SCCNC(=O)CCNC(=O)C(C(COP(=O)(OP(=O)(OCC1OC(C(C1OP(=O)(O)O)O)n1cnc2c1ncnc2N)O)O)(C)C)O	1
O95573	ACSL3_HUMAN	6.2.1.3	1569880463	46208|RHEA: 46209,Metrxn:127779,FACOAL200,rxn37339|rxn37334|rxn37329|rxn37325|rxn37323,MNXR128464,HMR_2966|HMR_0283	6.2.1A2(rev)	Eicosanoyl-CoA	1467885719	C02041	CCCCCCCCCCCCCCCCCCCC(=O)SCCNC(=O)CCNC(=O)C(C(COP(=O)(OP(=O)(OCC1OC(C(C1OP(=O)(O)O)O)n1cnc2c1ncnc2N)O)O)(C)C)O	(5Z,11Z,14Z,17Z)-Icosa-5,11,14,17-tetraenoyl-CoA	1468050095	C21083				CCC=CCC=CCC=CCCCCC=CCCCC(=O)SCCNC(=O)CCNC(=O)C(C(COP(=O)(OP(=O)(OCC1OC(C(C1OP(=O)(O)O)O)n1cnc2c1ncnc2N)O)O)(C)C)O	1
O95573	ACSL3_HUMAN	6.2.1.3	1569818701	33615|RHEA: 33616,Metrxn:127777,OCDCAFATPc|FACOAL180,rxn37341|rxn37338|rxn37333|rxn37328|rxn09449|rxn08454,MNXR102141|MNXR99164,RXN-16380,HMR_2957|HMR_0249	6.2.1A2(rev)	Stearoyl-CoA	1467870680	C00412	CCCCCCCCCCCCCCCCCC(=O)SCCNC(=O)CCNC(=O)C(C(COP(=O)(OP(=O)(OCC1OC(C(C1OP(=O)(O)O)O)n1cnc2c1ncnc2N)O)O)(C)C)O	(9Z,12Z)-Hexadeca-9,12-dienoyl-CoA	1468049446	C21000				CCCC=CCC=CCCCCCCCC(=O)SCCNC(=O)CCNC(=O)C(C(COP(=O)(OP(=O)(OCC1OC(C(C1OP(=O)(O)O)O)n1cnc2c1ncnc2N)O)O)(C)C)O	1
O95573	ACSL3_HUMAN	6.2.1.3	1569880463	46208|RHEA: 46209,Metrxn:127779,FACOAL200,rxn37339|rxn37334|rxn37329|rxn37325|rxn37323,MNXR128464,HMR_2966|HMR_0283	6.2.1A2(rev)	Eicosanoyl-CoA	1467885719	C02041	CCCCCCCCCCCCCCCCCCCC(=O)SCCNC(=O)CCNC(=O)C(C(COP(=O)(OP(=O)(OCC1OC(C(C1OP(=O)(O)O)O)n1cnc2c1ncnc2N)O)O)(C)C)O	(R)-2-Hydroxyisocaproyl-CoA	1468050141	C21089				CC(CC(C(=O)SCCNC(=O)CCNC(=O)C(C(COP(=O)(OP(=O)(OCC1OC(C(C1OP(=O)(O)O)O)n1cnc2c1ncnc2N)O)O)(C)C)O)O)C	1
O95573	ACSL3_HUMAN	6.2.1.3	1569818701	33615|RHEA: 33616,Metrxn:127777,OCDCAFATPc|FACOAL180,rxn37341|rxn37338|rxn37333|rxn37328|rxn09449|rxn08454,MNXR102141|MNXR99164,RXN-16380,HMR_2957|HMR_0249	6.2.1A2(rev)	Stearoyl-CoA	1467870680	C00412	CCCCCCCCCCCCCCCCCC(=O)SCCNC(=O)CCNC(=O)C(C(COP(=O)(OP(=O)(OCC1OC(C(C1OP(=O)(O)O)O)n1cnc2c1ncnc2N)O)O)(C)C)O	18-Hydroxyoleoyl-CoA	1468049482	C21005				OCCCCCCCCC=CCCCCCCCC(=O)SCCNC(=O)CCNC(=O)C(C(COP(=O)(OP(=O)(OCC1OC(C(C1OP(=O)(O)O)O)n1cnc2c1ncnc2N)O)O)(C)C)O	1
O95573	ACSL3_HUMAN	6.2.1.3	1569880463	46208|RHEA: 46209,Metrxn:127779,FACOAL200,rxn37339|rxn37334|rxn37329|rxn37325|rxn37323,MNXR128464,HMR_2966|HMR_0283	6.2.1A2(rev)	Eicosanoyl-CoA	1467885719	C02041	CCCCCCCCCCCCCCCCCCCC(=O)SCCNC(=O)CCNC(=O)C(C(COP(=O)(OP(=O)(OCC1OC(C(C1OP(=O)(O)O)O)n1cnc2c1ncnc2N)O)O)(C)C)O	Isocaprenoyl-CoA	1468050150	C21090				O=C(NCCSC(=O)C=CC(C)C)CCNC(=O)C(C(COP(=O)(OP(=O)(OCC1OC(C(C1OP(=O)(O)O)O)n1cnc2c1ncnc2N)O)O)(C)C)O	1
O95573	ACSL3_HUMAN	6.2.1.3	1569880463	46208|RHEA: 46209,Metrxn:127779,FACOAL200,rxn37339|rxn37334|rxn37329|rxn37325|rxn37323,MNXR128464,HMR_2966|HMR_0283	6.2.1A2(rev)	Eicosanoyl-CoA	1467885719	C02041	CCCCCCCCCCCCCCCCCCCC(=O)SCCNC(=O)CCNC(=O)C(C(COP(=O)(OP(=O)(OCC1OC(C(C1OP(=O)(O)O)O)n1cnc2c1ncnc2N)O)O)(C)C)O	Dihydrocaffeoyl-CoA	1468050793	C21175				O=C(NCCSC(=O)CCc1ccc(c(c1)O)O)CCNC(=O)C(C(COP(=O)(OP(=O)(OCC1OC(C(C1OP(=O)(O)O)O)n1cnc2c1ncnc2N)O)O)(C)C)O	1
O95573	ACSL3_HUMAN	6.2.1.3	1569818701	33615|RHEA: 33616,Metrxn:127777,OCDCAFATPc|FACOAL180,rxn37341|rxn37338|rxn37333|rxn37328|rxn09449|rxn08454,MNXR102141|MNXR99164,RXN-16380,HMR_2957|HMR_0249	6.2.1A2(rev)	Stearoyl-CoA	1467870680	C00412	CCCCCCCCCCCCCCCCCC(=O)SCCNC(=O)CCNC(=O)C(C(COP(=O)(OP(=O)(OCC1OC(C(C1OP(=O)(O)O)O)n1cnc2c1ncnc2N)O)O)(C)C)O	18-Hydroxylinoleoyl-CoA	1468049489	C21006				OCCCCCC=CCC=CCCCCCCCC(=O)SCCNC(=O)CCNC(=O)C(C(COP(=O)(OP(=O)(OCC1OC(C(C1OP(=O)(O)O)O)n1cnc2c1ncnc2N)O)O)(C)C)O	1
O95573	ACSL3_HUMAN	6.2.1.3	1569880463	46208|RHEA: 46209,Metrxn:127779,FACOAL200,rxn37339|rxn37334|rxn37329|rxn37325|rxn37323,MNXR128464,HMR_2966|HMR_0283	6.2.1A2(rev)	Eicosanoyl-CoA	1467885719	C02041	CCCCCCCCCCCCCCCCCCCC(=O)SCCNC(=O)CCNC(=O)C(C(COP(=O)(OP(=O)(OCC1OC(C(C1OP(=O)(O)O)O)n1cnc2c1ncnc2N)O)O)(C)C)O	3-Methylglutaconyl-CoA	1468054552	C03231				O=C(NCCSC(=O)CC(=CC(=O)O)C)CCNC(=O)C(C(COP(=O)(OP(=O)(OCC1OC(C(C1OP(=O)(O)O)O)n1cnc2c1ncnc2N)O)O)(C)C)O	1
O95573	ACSL3_HUMAN	6.2.1.3	1569818701	33615|RHEA: 33616,Metrxn:127777,OCDCAFATPc|FACOAL180,rxn37341|rxn37338|rxn37333|rxn37328|rxn09449|rxn08454,MNXR102141|MNXR99164,RXN-16380,HMR_2957|HMR_0249	6.2.1A2(rev)	Stearoyl-CoA	1467870680	C00412	CCCCCCCCCCCCCCCCCC(=O)SCCNC(=O)CCNC(=O)C(C(COP(=O)(OP(=O)(OCC1OC(C(C1OP(=O)(O)O)O)n1cnc2c1ncnc2N)O)O)(C)C)O	Palmitoleoyl-CoA	1468050008	C21072			FDB023321|	CCCCCCC=CCCCCCCCC(=O)SCCNC(=O)CCNC(=O)C(C(COP(=O)(OP(=O)(OCC1OC(C(C1OP(=O)(O)O)O)n1cnc2c1ncnc2N)O)O)(C)C)O	1
O95573	ACSL3_HUMAN	6.2.1.3	1569880463	46208|RHEA: 46209,Metrxn:127779,FACOAL200,rxn37339|rxn37334|rxn37329|rxn37325|rxn37323,MNXR128464,HMR_2966|HMR_0283	6.2.1A2(rev)	Eicosanoyl-CoA	1467885719	C02041	CCCCCCCCCCCCCCCCCCCC(=O)SCCNC(=O)CCNC(=O)C(C(COP(=O)(OP(=O)(OCC1OC(C(C1OP(=O)(O)O)O)n1cnc2c1ncnc2N)O)O)(C)C)O	2-Succinylbenzoyl-CoA	1468054720	C03160				O=C(NCCSC(=O)c1ccccc1C(=O)CCC(=O)O)CCNC(=O)C(C(COP(=O)(OP(=O)(OCC1OC(C(C1OP(=O)(O)O)O)n1cnc2c1ncnc2N)O)O)(C)C)O	1
O95573	ACSL3_HUMAN	6.2.1.3	1569818701	33615|RHEA: 33616,Metrxn:127777,OCDCAFATPc|FACOAL180,rxn37341|rxn37338|rxn37333|rxn37328|rxn09449|rxn08454,MNXR102141|MNXR99164,RXN-16380,HMR_2957|HMR_0249	6.2.1A2(rev)	Stearoyl-CoA	1467870680	C00412	CCCCCCCCCCCCCCCCCC(=O)SCCNC(=O)CCNC(=O)C(C(COP(=O)(OP(=O)(OCC1OC(C(C1OP(=O)(O)O)O)n1cnc2c1ncnc2N)O)O)(C)C)O	Gentisyl-CoA	1468050080	C21081				O=C(NCCSC(=O)c1cc(O)ccc1O)CCNC(=O)C(C(COP(=O)(OP(=O)(OCC1OC(C(C1OP(=O)(O)O)O)n1cnc2c1ncnc2N)O)O)(C)C)O	1
O95573	ACSL3_HUMAN	6.2.1.3	1569880463	46208|RHEA: 46209,Metrxn:127779,FACOAL200,rxn37339|rxn37334|rxn37329|rxn37325|rxn37323,MNXR128464,HMR_2966|HMR_0283	6.2.1A2(rev)	Eicosanoyl-CoA	1467885719	C02041	CCCCCCCCCCCCCCCCCCCC(=O)SCCNC(=O)CCNC(=O)C(C(COP(=O)(OP(=O)(OCC1OC(C(C1OP(=O)(O)O)O)n1cnc2c1ncnc2N)O)O)(C)C)O	(S)-3-hydroxyhexacosanoyl-CoA	1468095493					CCCCCCCCCCCCCCCCCCCCCCCC(CC(=O)SCCNC(=O)CCNC(=O)C(C(COP(=O)(OP(=O)(OCC1OC(C(C1OP(=O)(O)O)O)n1cnc2c1ncnc2N)O)O)(C)C)O)O	1
O95573	ACSL3_HUMAN	6.2.1.3	1569880463	46208|RHEA: 46209,Metrxn:127779,FACOAL200,rxn37339|rxn37334|rxn37329|rxn37325|rxn37323,MNXR128464,HMR_2966|HMR_0283	6.2.1A2(rev)	Eicosanoyl-CoA	1467885719	C02041	CCCCCCCCCCCCCCCCCCCC(=O)SCCNC(=O)CCNC(=O)C(C(COP(=O)(OP(=O)(OCC1OC(C(C1OP(=O)(O)O)O)n1cnc2c1ncnc2N)O)O)(C)C)O	3-Oxohexacosyl-CoA	1468095501					CCCCCCCCCCCCCCCCCCCCCCCC(=O)CC(=O)SCCNC(=O)CCNC(=O)C(C(COP(=O)(OP(=O)(OCC1OC(C(C1OP(=O)(O)O)O)n1cnc2c1ncnc2N)O)O)(C)C)O	1
O95573	ACSL3_HUMAN	6.2.1.3	1569818701	33615|RHEA: 33616,Metrxn:127777,OCDCAFATPc|FACOAL180,rxn37341|rxn37338|rxn37333|rxn37328|rxn09449|rxn08454,MNXR102141|MNXR99164,RXN-16380,HMR_2957|HMR_0249	6.2.1A2(rev)	Stearoyl-CoA	1467870680	C00412	CCCCCCCCCCCCCCCCCC(=O)SCCNC(=O)CCNC(=O)C(C(COP(=O)(OP(=O)(OCC1OC(C(C1OP(=O)(O)O)O)n1cnc2c1ncnc2N)O)O)(C)C)O	(5Z,11Z,14Z)-Icosa-5,11,14-trienoyl-CoA	1468050088	C21082				CCCCCC=CCC=CCCCCC=CCCCC(=O)SCCNC(=O)CCNC(=O)C(C(COP(=O)(OP(=O)(OCC1OC(C(C1OP(=O)(O)O)O)n1cnc2c1ncnc2N)O)O)(C)C)O	1
O95573	ACSL3_HUMAN	6.2.1.3	1569880463	46208|RHEA: 46209,Metrxn:127779,FACOAL200,rxn37339|rxn37334|rxn37329|rxn37325|rxn37323,MNXR128464,HMR_2966|HMR_0283	6.2.1A2(rev)	Eicosanoyl-CoA	1467885719	C02041	CCCCCCCCCCCCCCCCCCCC(=O)SCCNC(=O)CCNC(=O)C(C(COP(=O)(OP(=O)(OCC1OC(C(C1OP(=O)(O)O)O)n1cnc2c1ncnc2N)O)O)(C)C)O	(2-trans,4-cis)-deca-2,4-dienoyl-CoA	1468122459				FDB022461|	CCCCCC=CC=CC(=O)SCCNC(=O)CCNC(=O)C(C(COP(=O)(OP(=O)(OCC1OC(C(C1OP(=O)(O)O)O)n1cnc2c1ncnc2N)O)O)(C)C)O	1
O95573	ACSL3_HUMAN	6.2.1.3	1569818701	33615|RHEA: 33616,Metrxn:127777,OCDCAFATPc|FACOAL180,rxn37341|rxn37338|rxn37333|rxn37328|rxn09449|rxn08454,MNXR102141|MNXR99164,RXN-16380,HMR_2957|HMR_0249	6.2.1A2(rev)	Stearoyl-CoA	1467870680	C00412	CCCCCCCCCCCCCCCCCC(=O)SCCNC(=O)CCNC(=O)C(C(COP(=O)(OP(=O)(OCC1OC(C(C1OP(=O)(O)O)O)n1cnc2c1ncnc2N)O)O)(C)C)O	(5Z,11Z,14Z,17Z)-Icosa-5,11,14,17-tetraenoyl-CoA	1468050095	C21083				CCC=CCC=CCC=CCCCCC=CCCCC(=O)SCCNC(=O)CCNC(=O)C(C(COP(=O)(OP(=O)(OCC1OC(C(C1OP(=O)(O)O)O)n1cnc2c1ncnc2N)O)O)(C)C)O	1
O95573	ACSL3_HUMAN	6.2.1.3	1569880463	46208|RHEA: 46209,Metrxn:127779,FACOAL200,rxn37339|rxn37334|rxn37329|rxn37325|rxn37323,MNXR128464,HMR_2966|HMR_0283	6.2.1A2(rev)	Eicosanoyl-CoA	1467885719	C02041	CCCCCCCCCCCCCCCCCCCC(=O)SCCNC(=O)CCNC(=O)C(C(COP(=O)(OP(=O)(OCC1OC(C(C1OP(=O)(O)O)O)n1cnc2c1ncnc2N)O)O)(C)C)O	trans-dec-3-enoyl-CoA	1468122499			CHEMBL1949902,CHEMBL1949905	FDB022862|	CCCCCCC=CCC(=O)SCCNC(=O)CCNC(=O)C(C(COP(=O)(OP(=O)(OCC1OC(C(C1OP(=O)(O)O)O)n1cnc2c1ncnc2N)O)O)(C)C)O	1
O95573	ACSL3_HUMAN	6.2.1.3	1569818701	33615|RHEA: 33616,Metrxn:127777,OCDCAFATPc|FACOAL180,rxn37341|rxn37338|rxn37333|rxn37328|rxn09449|rxn08454,MNXR102141|MNXR99164,RXN-16380,HMR_2957|HMR_0249	6.2.1A2(rev)	Stearoyl-CoA	1467870680	C00412	CCCCCCCCCCCCCCCCCC(=O)SCCNC(=O)CCNC(=O)C(C(COP(=O)(OP(=O)(OCC1OC(C(C1OP(=O)(O)O)O)n1cnc2c1ncnc2N)O)O)(C)C)O	(R)-2-Hydroxyisocaproyl-CoA	1468050141	C21089				CC(CC(C(=O)SCCNC(=O)CCNC(=O)C(C(COP(=O)(OP(=O)(OCC1OC(C(C1OP(=O)(O)O)O)n1cnc2c1ncnc2N)O)O)(C)C)O)O)C	1
O95573	ACSL3_HUMAN	6.2.1.3	1569880463	46208|RHEA: 46209,Metrxn:127779,FACOAL200,rxn37339|rxn37334|rxn37329|rxn37325|rxn37323,MNXR128464,HMR_2966|HMR_0283	6.2.1A2(rev)	Eicosanoyl-CoA	1467885719	C02041	CCCCCCCCCCCCCCCCCCCC(=O)SCCNC(=O)CCNC(=O)C(C(COP(=O)(OP(=O)(OCC1OC(C(C1OP(=O)(O)O)O)n1cnc2c1ncnc2N)O)O)(C)C)O	cis-dec-4-enoyl-CoA	1468122571				FDB022867|	CCCCCC=CCCC(=O)SCCNC(=O)CCNC(=O)C(C(COP(=O)(OP(=O)(OCC1OC(C(C1OP(=O)(O)O)O)n1cnc2c1ncnc2N)O)O)(C)C)O	1
O95573	ACSL3_HUMAN	6.2.1.3	1569880463	46208|RHEA: 46209,Metrxn:127779,FACOAL200,rxn37339|rxn37334|rxn37329|rxn37325|rxn37323,MNXR128464,HMR_2966|HMR_0283	6.2.1A2(rev)	Eicosanoyl-CoA	1467885719	C02041	CCCCCCCCCCCCCCCCCCCC(=O)SCCNC(=O)CCNC(=O)C(C(COP(=O)(OP(=O)(OCC1OC(C(C1OP(=O)(O)O)O)n1cnc2c1ncnc2N)O)O)(C)C)O	heptanoyl-CoA	1468150580				FDB029227|	CCCCCCC(=O)SCCNC(=O)CCNC(=O)C(C(COP(=O)(OP(=O)(OCC1OC(C(C1OP(=O)(O)O)O)n1cnc2c1ncnc2N)O)O)(C)C)O	1
O95573	ACSL3_HUMAN	6.2.1.3	1569818701	33615|RHEA: 33616,Metrxn:127777,OCDCAFATPc|FACOAL180,rxn37341|rxn37338|rxn37333|rxn37328|rxn09449|rxn08454,MNXR102141|MNXR99164,RXN-16380,HMR_2957|HMR_0249	6.2.1A2(rev)	Stearoyl-CoA	1467870680	C00412	CCCCCCCCCCCCCCCCCC(=O)SCCNC(=O)CCNC(=O)C(C(COP(=O)(OP(=O)(OCC1OC(C(C1OP(=O)(O)O)O)n1cnc2c1ncnc2N)O)O)(C)C)O	Isocaprenoyl-CoA	1468050150	C21090				O=C(NCCSC(=O)C=CC(C)C)CCNC(=O)C(C(COP(=O)(OP(=O)(OCC1OC(C(C1OP(=O)(O)O)O)n1cnc2c1ncnc2N)O)O)(C)C)O	1
O95573	ACSL3_HUMAN	6.2.1.3	1569880463	46208|RHEA: 46209,Metrxn:127779,FACOAL200,rxn37339|rxn37334|rxn37329|rxn37325|rxn37323,MNXR128464,HMR_2966|HMR_0283	6.2.1A2(rev)	Eicosanoyl-CoA	1467885719	C02041	CCCCCCCCCCCCCCCCCCCC(=O)SCCNC(=O)CCNC(=O)C(C(COP(=O)(OP(=O)(OCC1OC(C(C1OP(=O)(O)O)O)n1cnc2c1ncnc2N)O)O)(C)C)O	pristanoyl-CoA	1468176721					CC(CCCC(CCCC(C)C)C)CCCC(C(=O)SCCNC(=O)CCNC(=O)C(C(COP(=O)(OP(=O)(OCC1OC(C(C1OP(=O)(O)O)O)n1cnc2c1ncnc2N)O)O)(C)C)O)C	1
O95573	ACSL3_HUMAN	6.2.1.3	1569880463	46208|RHEA: 46209,Metrxn:127779,FACOAL200,rxn37339|rxn37334|rxn37329|rxn37325|rxn37323,MNXR128464,HMR_2966|HMR_0283	6.2.1A2(rev)	Eicosanoyl-CoA	1467885719	C02041	CCCCCCCCCCCCCCCCCCCC(=O)SCCNC(=O)CCNC(=O)C(C(COP(=O)(OP(=O)(OCC1OC(C(C1OP(=O)(O)O)O)n1cnc2c1ncnc2N)O)O)(C)C)O	3-hydroxydocosanoyl-CoA	1468182062					CCCCCCCCCCCCCCCCCCCC(CC(=O)SCCNC(=O)CCNC(=O)C(C(COP(=O)(OP(=O)(OCC1OC(C(C1OP(=O)(O)O)O)n1cnc2c1ncnc2N)O)O)(C)C)O)O	1
O95573	ACSL3_HUMAN	6.2.1.3	1569818701	33615|RHEA: 33616,Metrxn:127777,OCDCAFATPc|FACOAL180,rxn37341|rxn37338|rxn37333|rxn37328|rxn09449|rxn08454,MNXR102141|MNXR99164,RXN-16380,HMR_2957|HMR_0249	6.2.1A2(rev)	Stearoyl-CoA	1467870680	C00412	CCCCCCCCCCCCCCCCCC(=O)SCCNC(=O)CCNC(=O)C(C(COP(=O)(OP(=O)(OCC1OC(C(C1OP(=O)(O)O)O)n1cnc2c1ncnc2N)O)O)(C)C)O	Dihydrocaffeoyl-CoA	1468050793	C21175				O=C(NCCSC(=O)CCc1ccc(c(c1)O)O)CCNC(=O)C(C(COP(=O)(OP(=O)(OCC1OC(C(C1OP(=O)(O)O)O)n1cnc2c1ncnc2N)O)O)(C)C)O	1
O95573	ACSL3_HUMAN	6.2.1.3	1569880463	46208|RHEA: 46209,Metrxn:127779,FACOAL200,rxn37339|rxn37334|rxn37329|rxn37325|rxn37323,MNXR128464,HMR_2966|HMR_0283	6.2.1A2(rev)	Eicosanoyl-CoA	1467885719	C02041	CCCCCCCCCCCCCCCCCCCC(=O)SCCNC(=O)CCNC(=O)C(C(COP(=O)(OP(=O)(OCC1OC(C(C1OP(=O)(O)O)O)n1cnc2c1ncnc2N)O)O)(C)C)O	3-Oxodocosanoyl-CoA	1468182086					CCCCCCCCCCCCCCCCCCCC(=O)CC(=O)SCCNC(=O)CCNC(=O)C(C(COP(=O)(OP(=O)(OCC1OC(C(C1OP(=O)(O)O)O)n1cnc2c1ncnc2N)O)O)(C)C)O	1
O95573	ACSL3_HUMAN	6.2.1.3	1569880463	46208|RHEA: 46209,Metrxn:127779,FACOAL200,rxn37339|rxn37334|rxn37329|rxn37325|rxn37323,MNXR128464,HMR_2966|HMR_0283	6.2.1A2(rev)	Eicosanoyl-CoA	1467885719	C02041	CCCCCCCCCCCCCCCCCCCC(=O)SCCNC(=O)CCNC(=O)C(C(COP(=O)(OP(=O)(OCC1OC(C(C1OP(=O)(O)O)O)n1cnc2c1ncnc2N)O)O)(C)C)O	hexacosanoyl-CoA	1468185453				FDB023919|	CCCCCCCCCCCCCCCCCCCCCCCCCC(=O)SCCNC(=O)CCNC(=O)C(C(COP(=O)(OP(=O)(OCC1OC(C(C1OP(=O)(O)O)O)n1cnc2c1ncnc2N)O)O)(C)C)O	1
O95573	ACSL3_HUMAN	6.2.1.3	1569818701	33615|RHEA: 33616,Metrxn:127777,OCDCAFATPc|FACOAL180,rxn37341|rxn37338|rxn37333|rxn37328|rxn09449|rxn08454,MNXR102141|MNXR99164,RXN-16380,HMR_2957|HMR_0249	6.2.1A2(rev)	Stearoyl-CoA	1467870680	C00412	CCCCCCCCCCCCCCCCCC(=O)SCCNC(=O)CCNC(=O)C(C(COP(=O)(OP(=O)(OCC1OC(C(C1OP(=O)(O)O)O)n1cnc2c1ncnc2N)O)O)(C)C)O	3-Methylglutaconyl-CoA	1468054552	C03231				O=C(NCCSC(=O)CC(=CC(=O)O)C)CCNC(=O)C(C(COP(=O)(OP(=O)(OCC1OC(C(C1OP(=O)(O)O)O)n1cnc2c1ncnc2N)O)O)(C)C)O	1
O95573	ACSL3_HUMAN	6.2.1.3	1569880463	46208|RHEA: 46209,Metrxn:127779,FACOAL200,rxn37339|rxn37334|rxn37329|rxn37325|rxn37323,MNXR128464,HMR_2966|HMR_0283	6.2.1A2(rev)	Eicosanoyl-CoA	1467885719	C02041	CCCCCCCCCCCCCCCCCCCC(=O)SCCNC(=O)CCNC(=O)C(C(COP(=O)(OP(=O)(OCC1OC(C(C1OP(=O)(O)O)O)n1cnc2c1ncnc2N)O)O)(C)C)O	trans-2-hexacosenoyl-CoA	1468185516					CCCCCCCCCCCCCCCCCCCCCCCC=CC(=O)SCCNC(=O)CCNC(=O)C(C(COP(=O)(OP(=O)(OCC1OC(C(C1OP(=O)(O)O)O)n1cnc2c1ncnc2N)O)O)(C)C)O	1
O95573	ACSL3_HUMAN	6.2.1.3	1569818701	33615|RHEA: 33616,Metrxn:127777,OCDCAFATPc|FACOAL180,rxn37341|rxn37338|rxn37333|rxn37328|rxn09449|rxn08454,MNXR102141|MNXR99164,RXN-16380,HMR_2957|HMR_0249	6.2.1A2(rev)	Stearoyl-CoA	1467870680	C00412	CCCCCCCCCCCCCCCCCC(=O)SCCNC(=O)CCNC(=O)C(C(COP(=O)(OP(=O)(OCC1OC(C(C1OP(=O)(O)O)O)n1cnc2c1ncnc2N)O)O)(C)C)O	2-Succinylbenzoyl-CoA	1468054720	C03160				O=C(NCCSC(=O)c1ccccc1C(=O)CCC(=O)O)CCNC(=O)C(C(COP(=O)(OP(=O)(OCC1OC(C(C1OP(=O)(O)O)O)n1cnc2c1ncnc2N)O)O)(C)C)O	1
O95573	ACSL3_HUMAN	6.2.1.3	1569880463	46208|RHEA: 46209,Metrxn:127779,FACOAL200,rxn37339|rxn37334|rxn37329|rxn37325|rxn37323,MNXR128464,HMR_2966|HMR_0283	6.2.1A2(rev)	Eicosanoyl-CoA	1467885719	C02041	CCCCCCCCCCCCCCCCCCCC(=O)SCCNC(=O)CCNC(=O)C(C(COP(=O)(OP(=O)(OCC1OC(C(C1OP(=O)(O)O)O)n1cnc2c1ncnc2N)O)O)(C)C)O	(E)-2,3-didehydropristanoyl-CoA	1468231015					CC(CCC=C(C(=O)SCCNC(=O)CCNC(=O)C(C(COP(=O)(OP(=O)(OCC1OC(C(C1OP(=O)(O)O)O)n1cnc2c1ncnc2N)O)O)(C)C)O)C)CCCC(CCCC(C)C)C	1
O95573	ACSL3_HUMAN	6.2.1.3	1569818701	33615|RHEA: 33616,Metrxn:127777,OCDCAFATPc|FACOAL180,rxn37341|rxn37338|rxn37333|rxn37328|rxn09449|rxn08454,MNXR102141|MNXR99164,RXN-16380,HMR_2957|HMR_0249	6.2.1A2(rev)	Stearoyl-CoA	1467870680	C00412	CCCCCCCCCCCCCCCCCC(=O)SCCNC(=O)CCNC(=O)C(C(COP(=O)(OP(=O)(OCC1OC(C(C1OP(=O)(O)O)O)n1cnc2c1ncnc2N)O)O)(C)C)O	(S)-3-hydroxyhexacosanoyl-CoA	1468095493					CCCCCCCCCCCCCCCCCCCCCCCC(CC(=O)SCCNC(=O)CCNC(=O)C(C(COP(=O)(OP(=O)(OCC1OC(C(C1OP(=O)(O)O)O)n1cnc2c1ncnc2N)O)O)(C)C)O)O	1
O95573	ACSL3_HUMAN	6.2.1.3	1569880463	46208|RHEA: 46209,Metrxn:127779,FACOAL200,rxn37339|rxn37334|rxn37329|rxn37325|rxn37323,MNXR128464,HMR_2966|HMR_0283	6.2.1A2(rev)	Eicosanoyl-CoA	1467885719	C02041	CCCCCCCCCCCCCCCCCCCC(=O)SCCNC(=O)CCNC(=O)C(C(COP(=O)(OP(=O)(OCC1OC(C(C1OP(=O)(O)O)O)n1cnc2c1ncnc2N)O)O)(C)C)O	4,8-dimethylnonanoyl-CoA	1468231389				FDB028315|	CC(CCC(=O)SCCNC(=O)CCNC(=O)C(C(COP(=O)(OP(=O)(OCC1OC(C(C1OP(=O)(O)O)O)n1cnc2c1ncnc2N)O)O)(C)C)O)CCCC(C)C	1
O95573	ACSL3_HUMAN	6.2.1.3	1569818701	33615|RHEA: 33616,Metrxn:127777,OCDCAFATPc|FACOAL180,rxn37341|rxn37338|rxn37333|rxn37328|rxn09449|rxn08454,MNXR102141|MNXR99164,RXN-16380,HMR_2957|HMR_0249	6.2.1A2(rev)	Stearoyl-CoA	1467870680	C00412	CCCCCCCCCCCCCCCCCC(=O)SCCNC(=O)CCNC(=O)C(C(COP(=O)(OP(=O)(OCC1OC(C(C1OP(=O)(O)O)O)n1cnc2c1ncnc2N)O)O)(C)C)O	3-Oxohexacosyl-CoA	1468095501					CCCCCCCCCCCCCCCCCCCCCCCC(=O)CC(=O)SCCNC(=O)CCNC(=O)C(C(COP(=O)(OP(=O)(OCC1OC(C(C1OP(=O)(O)O)O)n1cnc2c1ncnc2N)O)O)(C)C)O	1
O95573	ACSL3_HUMAN	6.2.1.3	1569880463	46208|RHEA: 46209,Metrxn:127779,FACOAL200,rxn37339|rxn37334|rxn37329|rxn37325|rxn37323,MNXR128464,HMR_2966|HMR_0283	6.2.1A2(rev)	Eicosanoyl-CoA	1467885719	C02041	CCCCCCCCCCCCCCCCCCCC(=O)SCCNC(=O)CCNC(=O)C(C(COP(=O)(OP(=O)(OCC1OC(C(C1OP(=O)(O)O)O)n1cnc2c1ncnc2N)O)O)(C)C)O	3-hydroxypristanoyl-CoA	1468231769					CC(CCC(C(C(=O)SCCNC(=O)CCNC(=O)C(C(COP(=O)(OP(=O)(OCC1OC(C(C1OP(=O)(O)O)O)n1cnc2c1ncnc2N)O)O)(C)C)O)C)O)CCCC(CCCC(C)C)C	1
O95573	ACSL3_HUMAN	6.2.1.3	1569818701	33615|RHEA: 33616,Metrxn:127777,OCDCAFATPc|FACOAL180,rxn37341|rxn37338|rxn37333|rxn37328|rxn09449|rxn08454,MNXR102141|MNXR99164,RXN-16380,HMR_2957|HMR_0249	6.2.1A2(rev)	Stearoyl-CoA	1467870680	C00412	CCCCCCCCCCCCCCCCCC(=O)SCCNC(=O)CCNC(=O)C(C(COP(=O)(OP(=O)(OCC1OC(C(C1OP(=O)(O)O)O)n1cnc2c1ncnc2N)O)O)(C)C)O	(2-trans,4-cis)-deca-2,4-dienoyl-CoA	1468122459				FDB022461|	CCCCCC=CC=CC(=O)SCCNC(=O)CCNC(=O)C(C(COP(=O)(OP(=O)(OCC1OC(C(C1OP(=O)(O)O)O)n1cnc2c1ncnc2N)O)O)(C)C)O	1
O95573	ACSL3_HUMAN	6.2.1.3	1569880463	46208|RHEA: 46209,Metrxn:127779,FACOAL200,rxn37339|rxn37334|rxn37329|rxn37325|rxn37323,MNXR128464,HMR_2966|HMR_0283	6.2.1A2(rev)	Eicosanoyl-CoA	1467885719	C02041	CCCCCCCCCCCCCCCCCCCC(=O)SCCNC(=O)CCNC(=O)C(C(COP(=O)(OP(=O)(OCC1OC(C(C1OP(=O)(O)O)O)n1cnc2c1ncnc2N)O)O)(C)C)O	(5Z)-tetradecenoyl-CoA	1468265688					CCCCCCCCC=CCCCC(=O)SCCNC(=O)CCNC(=O)C(C(COP(=O)(OP(=O)(OCC1OC(C(C1OP(=O)(O)O)O)n1cnc2c1ncnc2N)O)O)(C)C)O	1
O95573	ACSL3_HUMAN	6.2.1.3	1569818701	33615|RHEA: 33616,Metrxn:127777,OCDCAFATPc|FACOAL180,rxn37341|rxn37338|rxn37333|rxn37328|rxn09449|rxn08454,MNXR102141|MNXR99164,RXN-16380,HMR_2957|HMR_0249	6.2.1A2(rev)	Stearoyl-CoA	1467870680	C00412	CCCCCCCCCCCCCCCCCC(=O)SCCNC(=O)CCNC(=O)C(C(COP(=O)(OP(=O)(OCC1OC(C(C1OP(=O)(O)O)O)n1cnc2c1ncnc2N)O)O)(C)C)O	trans-dec-3-enoyl-CoA	1468122499			CHEMBL1949902,CHEMBL1949905	FDB022862|	CCCCCCC=CCC(=O)SCCNC(=O)CCNC(=O)C(C(COP(=O)(OP(=O)(OCC1OC(C(C1OP(=O)(O)O)O)n1cnc2c1ncnc2N)O)O)(C)C)O	1
O95573	ACSL3_HUMAN	6.2.1.3	1569880463	46208|RHEA: 46209,Metrxn:127779,FACOAL200,rxn37339|rxn37334|rxn37329|rxn37325|rxn37323,MNXR128464,HMR_2966|HMR_0283	6.2.1A2(rev)	Eicosanoyl-CoA	1467885719	C02041	CCCCCCCCCCCCCCCCCCCC(=O)SCCNC(=O)CCNC(=O)C(C(COP(=O)(OP(=O)(OCC1OC(C(C1OP(=O)(O)O)O)n1cnc2c1ncnc2N)O)O)(C)C)O	cis,cis-tetradeca-5,8-dienoyl-CoA	1468265696				FDB022950|	CCCCCC=CCC=CCCCC(=O)SCCNC(=O)CCNC(=O)C(C(COP(=O)(OP(=O)(OCC1OC(C(C1OP(=O)(O)O)O)n1cnc2c1ncnc2N)O)O)(C)C)O	1
O95573	ACSL3_HUMAN	6.2.1.3	1569818701	33615|RHEA: 33616,Metrxn:127777,OCDCAFATPc|FACOAL180,rxn37341|rxn37338|rxn37333|rxn37328|rxn09449|rxn08454,MNXR102141|MNXR99164,RXN-16380,HMR_2957|HMR_0249	6.2.1A2(rev)	Stearoyl-CoA	1467870680	C00412	CCCCCCCCCCCCCCCCCC(=O)SCCNC(=O)CCNC(=O)C(C(COP(=O)(OP(=O)(OCC1OC(C(C1OP(=O)(O)O)O)n1cnc2c1ncnc2N)O)O)(C)C)O	cis-dec-4-enoyl-CoA	1468122571				FDB022867|	CCCCCC=CCCC(=O)SCCNC(=O)CCNC(=O)C(C(COP(=O)(OP(=O)(OCC1OC(C(C1OP(=O)(O)O)O)n1cnc2c1ncnc2N)O)O)(C)C)O	1
O95573	ACSL3_HUMAN	6.2.1.3	1569880463	46208|RHEA: 46209,Metrxn:127779,FACOAL200,rxn37339|rxn37334|rxn37329|rxn37325|rxn37323,MNXR128464,HMR_2966|HMR_0283	6.2.1A2(rev)	Eicosanoyl-CoA	1467885719	C02041	CCCCCCCCCCCCCCCCCCCC(=O)SCCNC(=O)CCNC(=O)C(C(COP(=O)(OP(=O)(OCC1OC(C(C1OP(=O)(O)O)O)n1cnc2c1ncnc2N)O)O)(C)C)O	(12Z,15Z,18Z,21Z)-tetracosatetraenoyl-CoA	1468289620					CCC=CCC=CCC=CCC=CCCCCCCCCCCC(=O)SCCNC(=O)CCNC(=O)C(C(COP(=O)(OP(=O)(OCC1OC(C(C1OP(=O)(O)O)O)n1cnc2c1ncnc2N)O)O)(C)C)O	1
O95573	ACSL3_HUMAN	6.2.1.3	1569818701	33615|RHEA: 33616,Metrxn:127777,OCDCAFATPc|FACOAL180,rxn37341|rxn37338|rxn37333|rxn37328|rxn09449|rxn08454,MNXR102141|MNXR99164,RXN-16380,HMR_2957|HMR_0249	6.2.1A2(rev)	Stearoyl-CoA	1467870680	C00412	CCCCCCCCCCCCCCCCCC(=O)SCCNC(=O)CCNC(=O)C(C(COP(=O)(OP(=O)(OCC1OC(C(C1OP(=O)(O)O)O)n1cnc2c1ncnc2N)O)O)(C)C)O	heptanoyl-CoA	1468150580				FDB029227|	CCCCCCC(=O)SCCNC(=O)CCNC(=O)C(C(COP(=O)(OP(=O)(OCC1OC(C(C1OP(=O)(O)O)O)n1cnc2c1ncnc2N)O)O)(C)C)O	1
O95573	ACSL3_HUMAN	6.2.1.3	1569880463	46208|RHEA: 46209,Metrxn:127779,FACOAL200,rxn37339|rxn37334|rxn37329|rxn37325|rxn37323,MNXR128464,HMR_2966|HMR_0283	6.2.1A2(rev)	Eicosanoyl-CoA	1467885719	C02041	CCCCCCCCCCCCCCCCCCCC(=O)SCCNC(=O)CCNC(=O)C(C(COP(=O)(OP(=O)(OCC1OC(C(C1OP(=O)(O)O)O)n1cnc2c1ncnc2N)O)O)(C)C)O	2E,7Z,10Z,13Z,16Z-Docosapentaenoyl-CoA	1468302525					CCCCCC=CCC=CCC=CCC=CCCCC=CC(=O)SCCNC(=O)CCNC(=O)C(C(COP(=O)(OP(=O)(OCC1OC(C(C1OP(=O)(O)O)O)n1cnc2c1ncnc2N)O)O)(C)C)O	1
O95573	ACSL3_HUMAN	6.2.1.3	1569818701	33615|RHEA: 33616,Metrxn:127777,OCDCAFATPc|FACOAL180,rxn37341|rxn37338|rxn37333|rxn37328|rxn09449|rxn08454,MNXR102141|MNXR99164,RXN-16380,HMR_2957|HMR_0249	6.2.1A2(rev)	Stearoyl-CoA	1467870680	C00412	CCCCCCCCCCCCCCCCCC(=O)SCCNC(=O)CCNC(=O)C(C(COP(=O)(OP(=O)(OCC1OC(C(C1OP(=O)(O)O)O)n1cnc2c1ncnc2N)O)O)(C)C)O	pristanoyl-CoA	1468176721					CC(CCCC(CCCC(C)C)C)CCCC(C(=O)SCCNC(=O)CCNC(=O)C(C(COP(=O)(OP(=O)(OCC1OC(C(C1OP(=O)(O)O)O)n1cnc2c1ncnc2N)O)O)(C)C)O)C	1
O95573	ACSL3_HUMAN	6.2.1.3	1569880463	46208|RHEA: 46209,Metrxn:127779,FACOAL200,rxn37339|rxn37334|rxn37329|rxn37325|rxn37323,MNXR128464,HMR_2966|HMR_0283	6.2.1A2(rev)	Eicosanoyl-CoA	1467885719	C02041	CCCCCCCCCCCCCCCCCCCC(=O)SCCNC(=O)CCNC(=O)C(C(COP(=O)(OP(=O)(OCC1OC(C(C1OP(=O)(O)O)O)n1cnc2c1ncnc2N)O)O)(C)C)O	Retinoyl CoA	1468454238				FDB023947|	O=C(NCCSC(=O)C=C(C=CC=C(C=CC1=C(C)CCCC1(C)C)C)C)CCNC(=O)C(C(COP(=O)(OP(=O)(OCC1OC(C(C1OP(=O)(O)O)O)n1cnc2c1ncnc2N)O)O)(C)C)O	1
O95573	ACSL3_HUMAN	6.2.1.3	1569818701	33615|RHEA: 33616,Metrxn:127777,OCDCAFATPc|FACOAL180,rxn37341|rxn37338|rxn37333|rxn37328|rxn09449|rxn08454,MNXR102141|MNXR99164,RXN-16380,HMR_2957|HMR_0249	6.2.1A2(rev)	Stearoyl-CoA	1467870680	C00412	CCCCCCCCCCCCCCCCCC(=O)SCCNC(=O)CCNC(=O)C(C(COP(=O)(OP(=O)(OCC1OC(C(C1OP(=O)(O)O)O)n1cnc2c1ncnc2N)O)O)(C)C)O	3-hydroxydocosanoyl-CoA	1468182062					CCCCCCCCCCCCCCCCCCCC(CC(=O)SCCNC(=O)CCNC(=O)C(C(COP(=O)(OP(=O)(OCC1OC(C(C1OP(=O)(O)O)O)n1cnc2c1ncnc2N)O)O)(C)C)O)O	1
O95573	ACSL3_HUMAN	6.2.1.3	1569880463	46208|RHEA: 46209,Metrxn:127779,FACOAL200,rxn37339|rxn37334|rxn37329|rxn37325|rxn37323,MNXR128464,HMR_2966|HMR_0283	6.2.1A2(rev)	Eicosanoyl-CoA	1467885719	C02041	CCCCCCCCCCCCCCCCCCCC(=O)SCCNC(=O)CCNC(=O)C(C(COP(=O)(OP(=O)(OCC1OC(C(C1OP(=O)(O)O)O)n1cnc2c1ncnc2N)O)O)(C)C)O	L-Firefly luciferyl-CoA	1569575446	C21772				O=C(NCCSC(=O)[C@@H]1CSC(=N1)c1nc2c(s1)cc(cc2)O)CCNC(=O)[C@@H](C(COP(=O)(OP(=O)(OC[C@H]1O[C@H]([C@@H]([C@@H]1OP(=O)(O)O)O)n1cnc2c1ncnc2N)O)O)(C)C)O	1
O95573	ACSL3_HUMAN	6.2.1.3	1569818701	33615|RHEA: 33616,Metrxn:127777,OCDCAFATPc|FACOAL180,rxn37341|rxn37338|rxn37333|rxn37328|rxn09449|rxn08454,MNXR102141|MNXR99164,RXN-16380,HMR_2957|HMR_0249	6.2.1A2(rev)	Stearoyl-CoA	1467870680	C00412	CCCCCCCCCCCCCCCCCC(=O)SCCNC(=O)CCNC(=O)C(C(COP(=O)(OP(=O)(OCC1OC(C(C1OP(=O)(O)O)O)n1cnc2c1ncnc2N)O)O)(C)C)O	3-Oxodocosanoyl-CoA	1468182086					CCCCCCCCCCCCCCCCCCCC(=O)CC(=O)SCCNC(=O)CCNC(=O)C(C(COP(=O)(OP(=O)(OCC1OC(C(C1OP(=O)(O)O)O)n1cnc2c1ncnc2N)O)O)(C)C)O	1
O95573	ACSL3_HUMAN	6.2.1.3	1569880463	46208|RHEA: 46209,Metrxn:127779,FACOAL200,rxn37339|rxn37334|rxn37329|rxn37325|rxn37323,MNXR128464,HMR_2966|HMR_0283	6.2.1A2(rev)	Eicosanoyl-CoA	1467885719	C02041	CCCCCCCCCCCCCCCCCCCC(=O)SCCNC(=O)CCNC(=O)C(C(COP(=O)(OP(=O)(OCC1OC(C(C1OP(=O)(O)O)O)n1cnc2c1ncnc2N)O)O)(C)C)O	5-[2-[[3-[[(2R)-4-[[[(2R,3S,4R,5R)-5-(6-aminopurin-9-yl)-4-hydroxy-3-phosphonooxy-2-oxolanyl]methoxy-hydroxyphosphoryl]oxy-hydroxyphosphoryl]oxy-2-hydroxy-3,3-dimethyl-1-oxobutyl]amino]-1-oxopropyl]amino]ethylthio]-3-hydroxy-5-oxopentanoic acid	29762995					OC(CC(=O)SCCNC(=O)CCNC(=O)C(C(COP(=O)(OP(=O)(OCC1OC(C(C1OP(=O)(O)O)O)n1cnc2c1ncnc2N)O)O)(C)C)O)CC(=O)O	1
O95573	ACSL3_HUMAN	6.2.1.3	1569818701	33615|RHEA: 33616,Metrxn:127777,OCDCAFATPc|FACOAL180,rxn37341|rxn37338|rxn37333|rxn37328|rxn09449|rxn08454,MNXR102141|MNXR99164,RXN-16380,HMR_2957|HMR_0249	6.2.1A2(rev)	Stearoyl-CoA	1467870680	C00412	CCCCCCCCCCCCCCCCCC(=O)SCCNC(=O)CCNC(=O)C(C(COP(=O)(OP(=O)(OCC1OC(C(C1OP(=O)(O)O)O)n1cnc2c1ncnc2N)O)O)(C)C)O	hexacosanoyl-CoA	1468185453				FDB023919|	CCCCCCCCCCCCCCCCCCCCCCCCCC(=O)SCCNC(=O)CCNC(=O)C(C(COP(=O)(OP(=O)(OCC1OC(C(C1OP(=O)(O)O)O)n1cnc2c1ncnc2N)O)O)(C)C)O	1
O95573	ACSL3_HUMAN	6.2.1.3	1569880463	46208|RHEA: 46209,Metrxn:127779,FACOAL200,rxn37339|rxn37334|rxn37329|rxn37325|rxn37323,MNXR128464,HMR_2966|HMR_0283	6.2.1A2(rev)	Eicosanoyl-CoA	1467885719	C02041	CCCCCCCCCCCCCCCCCCCC(=O)SCCNC(=O)CCNC(=O)C(C(COP(=O)(OP(=O)(OCC1OC(C(C1OP(=O)(O)O)O)n1cnc2c1ncnc2N)O)O)(C)C)O	S-[2-[3-[[(2R)-4-[[[(2R,3R,5R)-5-(6-aminopurin-9-yl)-4-hydroxy-3-phosphonooxy-tetrahydrofuran-2-yl]methoxy-hydroxy-phosphoryl]oxy-hydroxy-phosphoryl]oxy-2-hydroxy-3,3-dimethyl-butanoyl]amino]propanoylamino]ethyl] henicosanethioate	299576341					CCCCCCCCCCCCCCCCCCCCC(=O)SCCNC(=O)CCNC(=O)C(C(COP(=O)(OP(=O)(OCC1OC(C(C1OP(=O)(O)O)O)n1cnc2c1ncnc2N)O)O)(C)C)O	1
O95573	ACSL3_HUMAN	6.2.1.3	1569818701	33615|RHEA: 33616,Metrxn:127777,OCDCAFATPc|FACOAL180,rxn37341|rxn37338|rxn37333|rxn37328|rxn09449|rxn08454,MNXR102141|MNXR99164,RXN-16380,HMR_2957|HMR_0249	6.2.1A2(rev)	Stearoyl-CoA	1467870680	C00412	CCCCCCCCCCCCCCCCCC(=O)SCCNC(=O)CCNC(=O)C(C(COP(=O)(OP(=O)(OCC1OC(C(C1OP(=O)(O)O)O)n1cnc2c1ncnc2N)O)O)(C)C)O	trans-2-hexacosenoyl-CoA	1468185516					CCCCCCCCCCCCCCCCCCCCCCCC=CC(=O)SCCNC(=O)CCNC(=O)C(C(COP(=O)(OP(=O)(OCC1OC(C(C1OP(=O)(O)O)O)n1cnc2c1ncnc2N)O)O)(C)C)O	1
O95573	ACSL3_HUMAN	6.2.1.3	1569880463	46208|RHEA: 46209,Metrxn:127779,FACOAL200,rxn37339|rxn37334|rxn37329|rxn37325|rxn37323,MNXR128464,HMR_2966|HMR_0283	6.2.1A2(rev)	Eicosanoyl-CoA	1467885719	C02041	CCCCCCCCCCCCCCCCCCCC(=O)SCCNC(=O)CCNC(=O)C(C(COP(=O)(OP(=O)(OCC1OC(C(C1OP(=O)(O)O)O)n1cnc2c1ncnc2N)O)O)(C)C)O	S-[2-[3-[[(2R)-4-[[[(2R,5R)-5-(6-aminopurin-9-yl)-4-hydroxy-3-phosphonooxy-tetrahydrofuran-2-yl]methoxy-hydroxy-phosphoryl]oxy-hydroxy-phosphoryl]oxy-2-hydroxy-3,3-dimethyl-butanoyl]amino]propanoylamino]ethyl] (5Z,8Z,11Z)-icosa-5,8,11-trienethioate	336846624					CCCCCCCCC=CCC=CCC=CCCCC(=O)SCCNC(=O)CCNC(=O)C(C(COP(=O)(OP(=O)(OCC1OC(C(C1OP(=O)(O)O)O)n1cnc2c1ncnc2N)O)O)(C)C)O	1
O95573	ACSL3_HUMAN	6.2.1.3	1569818701	33615|RHEA: 33616,Metrxn:127777,OCDCAFATPc|FACOAL180,rxn37341|rxn37338|rxn37333|rxn37328|rxn09449|rxn08454,MNXR102141|MNXR99164,RXN-16380,HMR_2957|HMR_0249	6.2.1A2(rev)	Stearoyl-CoA	1467870680	C00412	CCCCCCCCCCCCCCCCCC(=O)SCCNC(=O)CCNC(=O)C(C(COP(=O)(OP(=O)(OCC1OC(C(C1OP(=O)(O)O)O)n1cnc2c1ncnc2N)O)O)(C)C)O	(E)-2,3-didehydropristanoyl-CoA	1468231015					CC(CCC=C(C(=O)SCCNC(=O)CCNC(=O)C(C(COP(=O)(OP(=O)(OCC1OC(C(C1OP(=O)(O)O)O)n1cnc2c1ncnc2N)O)O)(C)C)O)C)CCCC(CCCC(C)C)C	1
O95573	ACSL3_HUMAN	6.2.1.3	1569880463	46208|RHEA: 46209,Metrxn:127779,FACOAL200,rxn37339|rxn37334|rxn37329|rxn37325|rxn37323,MNXR128464,HMR_2966|HMR_0283	6.2.1A2(rev)	Eicosanoyl-CoA	1467885719	C02041	CCCCCCCCCCCCCCCCCCCC(=O)SCCNC(=O)CCNC(=O)C(C(COP(=O)(OP(=O)(OCC1OC(C(C1OP(=O)(O)O)O)n1cnc2c1ncnc2N)O)O)(C)C)O	Cyclohexane-1-carboxyl-CoA	5433924	C09823				O=C(NCCSC(=O)C1CCCCC1)CCNC(=O)C(C(COP(=O)(OP(=O)(OCC1OC(C(C1OP(=O)(O)O)O)n1cnc2c1ncnc2N)O)O)(C)C)O	1
O95573	ACSL3_HUMAN	6.2.1.3	1569818701	33615|RHEA: 33616,Metrxn:127777,OCDCAFATPc|FACOAL180,rxn37341|rxn37338|rxn37333|rxn37328|rxn09449|rxn08454,MNXR102141|MNXR99164,RXN-16380,HMR_2957|HMR_0249	6.2.1A2(rev)	Stearoyl-CoA	1467870680	C00412	CCCCCCCCCCCCCCCCCC(=O)SCCNC(=O)CCNC(=O)C(C(COP(=O)(OP(=O)(OCC1OC(C(C1OP(=O)(O)O)O)n1cnc2c1ncnc2N)O)O)(C)C)O	4,8-dimethylnonanoyl-CoA	1468231389				FDB028315|	CC(CCC(=O)SCCNC(=O)CCNC(=O)C(C(COP(=O)(OP(=O)(OCC1OC(C(C1OP(=O)(O)O)O)n1cnc2c1ncnc2N)O)O)(C)C)O)CCCC(C)C	1
O95573	ACSL3_HUMAN	6.2.1.3	1569880463	46208|RHEA: 46209,Metrxn:127779,FACOAL200,rxn37339|rxn37334|rxn37329|rxn37325|rxn37323,MNXR128464,HMR_2966|HMR_0283	6.2.1A2(rev)	Eicosanoyl-CoA	1467885719	C02041	CCCCCCCCCCCCCCCCCCCC(=O)SCCNC(=O)CCNC(=O)C(C(COP(=O)(OP(=O)(OCC1OC(C(C1OP(=O)(O)O)O)n1cnc2c1ncnc2N)O)O)(C)C)O	S-[2-[3-[[(2R)-4-[[[(2R,3S,4R,5R)-5-(6-aminopurin-9-yl)-4-hydroxy-3-phosphonooxy-tetrahydrofuran-2-yl]methoxy-hydroxy-phosphoryl]oxy-hydroxy-phosphoryl]oxy-2-hydroxy-3,3-dimethyl-butanoyl]amino]propanoylamino]ethyl] 3-oxoheptanethioate	662289887					CCCCC(=O)CC(=O)SCCNC(=O)CCNC(=O)C(C(COP(=O)(OP(=O)(OCC1OC(C(C1OP(=O)(O)O)O)n1cnc2c1ncnc2N)O)O)(C)C)O	1
O95573	ACSL3_HUMAN	6.2.1.3	1569818701	33615|RHEA: 33616,Metrxn:127777,OCDCAFATPc|FACOAL180,rxn37341|rxn37338|rxn37333|rxn37328|rxn09449|rxn08454,MNXR102141|MNXR99164,RXN-16380,HMR_2957|HMR_0249	6.2.1A2(rev)	Stearoyl-CoA	1467870680	C00412	CCCCCCCCCCCCCCCCCC(=O)SCCNC(=O)CCNC(=O)C(C(COP(=O)(OP(=O)(OCC1OC(C(C1OP(=O)(O)O)O)n1cnc2c1ncnc2N)O)O)(C)C)O	3-hydroxypristanoyl-CoA	1468231769					CC(CCC(C(C(=O)SCCNC(=O)CCNC(=O)C(C(COP(=O)(OP(=O)(OCC1OC(C(C1OP(=O)(O)O)O)n1cnc2c1ncnc2N)O)O)(C)C)O)C)O)CCCC(CCCC(C)C)C	1
O95573	ACSL3_HUMAN	6.2.1.3	1569880463	46208|RHEA: 46209,Metrxn:127779,FACOAL200,rxn37339|rxn37334|rxn37329|rxn37325|rxn37323,MNXR128464,HMR_2966|HMR_0283	6.2.1A2(rev)	Eicosanoyl-CoA	1467885719	C02041	CCCCCCCCCCCCCCCCCCCC(=O)SCCNC(=O)CCNC(=O)C(C(COP(=O)(OP(=O)(OCC1OC(C(C1OP(=O)(O)O)O)n1cnc2c1ncnc2N)O)O)(C)C)O	S-[2-[3-[[(2R)-4-[[[(2R,3S,4R,5R)-5-(6-aminopurin-9-yl)-4-hydroxy-3-phosphonooxy-tetrahydrofuran-2-yl]methoxy-hydroxy-phosphoryl]oxy-hydroxy-phosphoryl]oxy-2-hydroxy-3,3-dimethyl-butanoyl]amino]propanoylamino]ethyl] (E)-hept-2-enethioate	662292472					CCCCC=CC(=O)SCCNC(=O)CCNC(=O)C(C(COP(=O)(OP(=O)(OCC1OC(C(C1OP(=O)(O)O)O)n1cnc2c1ncnc2N)O)O)(C)C)O	1
O95573	ACSL3_HUMAN	6.2.1.3	1569818701	33615|RHEA: 33616,Metrxn:127777,OCDCAFATPc|FACOAL180,rxn37341|rxn37338|rxn37333|rxn37328|rxn09449|rxn08454,MNXR102141|MNXR99164,RXN-16380,HMR_2957|HMR_0249	6.2.1A2(rev)	Stearoyl-CoA	1467870680	C00412	CCCCCCCCCCCCCCCCCC(=O)SCCNC(=O)CCNC(=O)C(C(COP(=O)(OP(=O)(OCC1OC(C(C1OP(=O)(O)O)O)n1cnc2c1ncnc2N)O)O)(C)C)O	(5Z)-tetradecenoyl-CoA	1468265688					CCCCCCCCC=CCCCC(=O)SCCNC(=O)CCNC(=O)C(C(COP(=O)(OP(=O)(OCC1OC(C(C1OP(=O)(O)O)O)n1cnc2c1ncnc2N)O)O)(C)C)O	1
O95573	ACSL3_HUMAN	6.2.1.3	1569880463	46208|RHEA: 46209,Metrxn:127779,FACOAL200,rxn37339|rxn37334|rxn37329|rxn37325|rxn37323,MNXR128464,HMR_2966|HMR_0283	6.2.1A2(rev)	Eicosanoyl-CoA	1467885719	C02041	CCCCCCCCCCCCCCCCCCCC(=O)SCCNC(=O)CCNC(=O)C(C(COP(=O)(OP(=O)(OCC1OC(C(C1OP(=O)(O)O)O)n1cnc2c1ncnc2N)O)O)(C)C)O	S-[2-[3-[[(2R)-4-[[[(2R,3S,4R,5R)-5-(6-aminopurin-9-yl)-4-hydroxy-3-phosphonooxy-tetrahydrofuran-2-yl]methoxy-hydroxy-phosphoryl]oxy-hydroxy-phosphoryl]oxy-2-hydroxy-3,3-dimethyl-butanoyl]amino]propanoylamino]ethyl] (5E,8E)-3-hydroxytetradeca-5,8-dienethioate	780090205					CCCCCC=CCC=CCC(CC(=O)SCCNC(=O)CCNC(=O)C(C(COP(=O)(OP(=O)(OCC1OC(C(C1OP(=O)(O)O)O)n1cnc2c1ncnc2N)O)O)(C)C)O)O	1
O95573	ACSL3_HUMAN	6.2.1.3	1569818701	33615|RHEA: 33616,Metrxn:127777,OCDCAFATPc|FACOAL180,rxn37341|rxn37338|rxn37333|rxn37328|rxn09449|rxn08454,MNXR102141|MNXR99164,RXN-16380,HMR_2957|HMR_0249	6.2.1A2(rev)	Stearoyl-CoA	1467870680	C00412	CCCCCCCCCCCCCCCCCC(=O)SCCNC(=O)CCNC(=O)C(C(COP(=O)(OP(=O)(OCC1OC(C(C1OP(=O)(O)O)O)n1cnc2c1ncnc2N)O)O)(C)C)O	cis,cis-tetradeca-5,8-dienoyl-CoA	1468265696				FDB022950|	CCCCCC=CCC=CCCCC(=O)SCCNC(=O)CCNC(=O)C(C(COP(=O)(OP(=O)(OCC1OC(C(C1OP(=O)(O)O)O)n1cnc2c1ncnc2N)O)O)(C)C)O	1
O95573	ACSL3_HUMAN	6.2.1.3	1569880463	46208|RHEA: 46209,Metrxn:127779,FACOAL200,rxn37339|rxn37334|rxn37329|rxn37325|rxn37323,MNXR128464,HMR_2966|HMR_0283	6.2.1A2(rev)	Eicosanoyl-CoA	1467885719	C02041	CCCCCCCCCCCCCCCCCCCC(=O)SCCNC(=O)CCNC(=O)C(C(COP(=O)(OP(=O)(OCC1OC(C(C1OP(=O)(O)O)O)n1cnc2c1ncnc2N)O)O)(C)C)O	S-[2-[3-[[(2R)-4-[[[(2R,3S,4R,5R)-5-(6-aminopurin-9-yl)-4-hydroxy-3-phosphonooxy-tetrahydrofuran-2-yl]methoxy-hydroxy-phosphoryl]oxy-hydroxy-phosphoryl]oxy-2-hydroxy-3,3-dimethyl-butanoyl]amino]propanoylamino]ethyl] furan-3-carbothioate	781852355					O=C(NCCSC(=O)c1cocc1)CCNC(=O)C(C(COP(=O)(OP(=O)(OCC1OC(C(C1OP(=O)(O)O)O)n1cnc2c1ncnc2N)O)O)(C)C)O	1
O95573	ACSL3_HUMAN	6.2.1.3	1569818701	33615|RHEA: 33616,Metrxn:127777,OCDCAFATPc|FACOAL180,rxn37341|rxn37338|rxn37333|rxn37328|rxn09449|rxn08454,MNXR102141|MNXR99164,RXN-16380,HMR_2957|HMR_0249	6.2.1A2(rev)	Stearoyl-CoA	1467870680	C00412	CCCCCCCCCCCCCCCCCC(=O)SCCNC(=O)CCNC(=O)C(C(COP(=O)(OP(=O)(OCC1OC(C(C1OP(=O)(O)O)O)n1cnc2c1ncnc2N)O)O)(C)C)O	(12Z,15Z,18Z,21Z)-tetracosatetraenoyl-CoA	1468289620					CCC=CCC=CCC=CCC=CCCCCCCCCCCC(=O)SCCNC(=O)CCNC(=O)C(C(COP(=O)(OP(=O)(OCC1OC(C(C1OP(=O)(O)O)O)n1cnc2c1ncnc2N)O)O)(C)C)O	1
O95573	ACSL3_HUMAN	6.2.1.3	1569818701	33615|RHEA: 33616,Metrxn:127777,OCDCAFATPc|FACOAL180,rxn37341|rxn37338|rxn37333|rxn37328|rxn09449|rxn08454,MNXR102141|MNXR99164,RXN-16380,HMR_2957|HMR_0249	6.2.1A2(rev)	Stearoyl-CoA	1467870680	C00412	CCCCCCCCCCCCCCCCCC(=O)SCCNC(=O)CCNC(=O)C(C(COP(=O)(OP(=O)(OCC1OC(C(C1OP(=O)(O)O)O)n1cnc2c1ncnc2N)O)O)(C)C)O	2E,7Z,10Z,13Z,16Z-Docosapentaenoyl-CoA	1468302525					CCCCCC=CCC=CCC=CCC=CCCCC=CC(=O)SCCNC(=O)CCNC(=O)C(C(COP(=O)(OP(=O)(OCC1OC(C(C1OP(=O)(O)O)O)n1cnc2c1ncnc2N)O)O)(C)C)O	1
O95573	ACSL3_HUMAN	6.2.1.3	1569818701	33615|RHEA: 33616,Metrxn:127777,OCDCAFATPc|FACOAL180,rxn37341|rxn37338|rxn37333|rxn37328|rxn09449|rxn08454,MNXR102141|MNXR99164,RXN-16380,HMR_2957|HMR_0249	6.2.1A2(rev)	Stearoyl-CoA	1467870680	C00412	CCCCCCCCCCCCCCCCCC(=O)SCCNC(=O)CCNC(=O)C(C(COP(=O)(OP(=O)(OCC1OC(C(C1OP(=O)(O)O)O)n1cnc2c1ncnc2N)O)O)(C)C)O	Retinoyl CoA	1468454238				FDB023947|	O=C(NCCSC(=O)C=C(C=CC=C(C=CC1=C(C)CCCC1(C)C)C)C)CCNC(=O)C(C(COP(=O)(OP(=O)(OCC1OC(C(C1OP(=O)(O)O)O)n1cnc2c1ncnc2N)O)O)(C)C)O	1
[truncated: 23,541 more rows]

## Sheet: S7.3
SARS-CoV-2-hijacked human protein IDs	Gene ID of protein	EC number linked to protein	Reaction NICEdrug ID	External ID reaction	BNICE.ch enzymatic rule in which protein participates	Name of native substrate of hijacked enzyme	Substrate NICEdrug ID	Substrate KEGG ID	Substrate SMILES	Name of drug sharing reactive site-centric similarity with native substrate (column G), or candidate drug	Drug NICEdrug ID	Drug KEGG ID	Drug DrugBank ID	Drug ChEMBL ID	Drug SMILES	NICEdrug score between substrates (column G) and drugs sharing reactive site-centric similarity (column K)
[truncated: 1,309 more rows]

[truncated: 4 more sheets: S7.4, S7.5, S7.6, S7.7]
