# Supplementary material for: NICEdrug.ch, a workflow for rational drug design and systems-level analysis of drug metabolism
Source: eLife. 2021 Aug 3;10:e65543. doi: 10.7554/eLife.65543 (PMC8331181; doi:10.7554/eLife.65543)
Supplement: Supplementary file 8. — (A) All drug molecules and (B) prodrugs in NICEdrug.ch sharing reactive site with the native substrates of the human enzyme HDAC2 and their NICEdrug score with this substrate. (C) All molecules cataloged in fooDB sharing reactive site with the native substrates of the human enzyme HDAC2 and their NICEdrug score with this substrate. (D) All drug molecules and (E) prodrug molecules in NICEdrug.ch sharing reactive site with the native substrates of the human enzyme ACE2 and their NICEdrug score with this substrate. (F) All molecules cataloged in fooDB sharing reactive site with the native substrates of the human enzyme ACE2 and their NICEdrug score with this substrate. (G) All molecules in NICEdrug.ch or cataloged in fooDB sharing reactive site with the native substrates of the human enzyme DNA-directed RNA polymerase and their NICEdrug score with this substrate. [file elife-65543-supp8.xlsx]

## Sheet: Summary
Tab in Supplementary_File_8	Description of each tab/section in Supplementary_File_8, related to Figure 7
S8.1	All drug molecules with HDAC2 substrate's reactive site and their NICEdrug score
S8.2	All prodrugs (substrates of drug metabolism) with HDAC2 substrate's reactive site and their NICEdrug score
S8.3	All molecules cataloged in fooDB with HDAC2 substrate's reactive site and their NICEdrug score
S8.4	All drug molecules with reactive site of ACE inhibitors and their NICEdrug score
S8.5	All prodrugs (substrates of drug metabolism) with reactive site of ACE inhibitor and their NICEdrug score
S8.6	All molecuels cataloged in fooDB with reactive site of ACE inhibitor and their NICEdrug score
S8.7	All molecules in NICEdrug.ch or cataloged in fooDB sharing reactive site with the native substrates of the human enzyme DNA-directed RNA polymerase and their NICEdrug score
	s

## Sheet: S8.1
Molecule name	Molecule NICEdrug ID	Molecule SMILES	Molecule DrugBank ID	Molecule KEGG ID	Molecule ChEMBL ID	Alpha score within NICEdrug score	Beta score within NICEdrug score	NICEdrug score	Molecule contains carboxylate moiety (similar to N6-acetyl-L-lysyl-[histone]) (1=yes, 0=no)	Molecule contains acetyl moiety (similar to acetate) (1=yes, 0=no)
N-(2,7-dioxooctyl)acetamide	6278035	O=C(CNC(=O)C)CCCCC(=O)C			ChEMBLE_NTD	1	0.928571	0.964286	1	0
2-acetamido-N-benzyl-6-[methylcarbamoyl(propyl)amino]hexanamide	4764916	CCCN(C(=O)NC)CCCCC(C(=O)NCc1ccccc1)NC(=O)C			ChEMBLE_NTD,CHEMBL2001640	1	0.857143	0.928571	1	0
N-(2-oxo-3-phenylpropyl)acetamide	6257327	O=C(Cc1ccccc1)CNC(=O)C			ChEMBLE_NTD	1	0.857143	0.928571	1	0
[4-(3-acetamido-2-oxo-propyl)phenyl] acetate	6257448	CC(=O)NCC(=O)Cc1ccc(cc1)OC(=O)C			ChEMBLE_NTD	1	0.857143	0.928571	1	0
N-(4-chloro-5-oxo-2-phenacyl-2H-furan-3-yl)acetamide	6303994	CC(=O)NC1=C(Cl)C(=O)OC1CC(=O)c1ccccc1			ChEMBLE_NTD	1	0.857143	0.928571	1	0
2-acetamido-N-benzyl-6-(benzylamino)hexanamide	4764828	CC(=O)NC(C(=O)NCc1ccccc1)CCCCNCc1ccccc1			ChEMBLE_NTD,CHEMBL1989116	1	0.785714	0.892857	1	0
N-[3-phenyl-3-[4-(trifluoromethyl)phenoxy]propyl]acetamide	6191804	CC(=O)NCCC(c1ccccc1)Oc1ccc(cc1)C(F)(F)F			ChEMBLE_NTD	1	0.785714	0.892857	1	0
(3-acetamido-1-phenyl-propyl) acetate	6191815	CC(=O)OC(c1ccccc1)CCNC(=O)C			ChEMBLE_NTD	1	0.785714	0.892857	1	0
N-[(5-oxo-2-oxolanyl)methyl]acetamide	6256713	CC(=O)NCC1CCC(=O)O1			ChEMBLE_NTD	1	0.785714	0.892857	1	0
3-ethoxy-5-(propoxymethyl)-4,5-dihydroisoxazole	6306097	CC(CCC1=C(C)C2C(O1)CC1C2(C)CCC2C1CCC1C2(C)CCC(C1)OC(=O)C)CNC(=O)C			ChEMBLE_NTD	1	0.785714	0.892857	1	0
2-acetamido-6-[(5-hydroxy-2-pentyl-3-oxolanyl)amino]hexanoic acid	6331098	CCCCCC1OC(CC1NCCCCC(C(=O)O)NC(=O)C)O			ChEMBLE_NTD	1	0.785714	0.892857	1	0
N-(2-quinolyl)acetamide	2731024	CC(=O)Nc1ccc2c(n1)cccc2			ChEMBLE_NTD,CHEMBL188851	1	0.761905	0.880952	1	0
Formyl-N-acetyl-5-methoxykynurenamine	1467911058	O=CNc1ccc(cc1C(=O)CCNC(=O)C)OC		C05642	CHEMBL1882218	1	0.761905	0.880952	1	0
N-(2-oxohex-5-enyl)acetamide	6257098	C=CCCC(=O)CNC(=O)C			ChEMBLE_NTD	1	0.714286	0.857143	1	0
[4-[(E)-3-(4-acetamidobutylamino)-3-oxo-prop-1-enyl]-2-acetoxy-phenyl] acetate	53412996	O=C(C=Cc1ccc(c(c1)OC(=O)C)OC(=O)C)NCCCCNC(=O)C			ChEMBLE_NTD	1	0.714286	0.857143	1	0
N8-Acetylspermidine	1467877028	NCCCNCCCCNC(=O)C		C01029	CHEMBL78630	1	0.714286	0.857143	1	0
N-&alpha;-acetyl lysine methyl ester	1469299414	NCCCCC(C(=O)OC)NC(=O)C			ChEMBLE_NTD	1	0.714286	0.857143	1	0
N-[3-[5-cyano-1-(4-fluorophenyl)-3H-isobenzofuran-1-yl]propyl]acetamide	6191749	N#Cc1ccc2c(c1)COC2(CCCNC(=O)C)c1ccc(cc1)F			ChEMBLE_NTD	1	0.711905	0.855952	1	0
(2-acetamido-3,4-diacetoxy-octadecyl) acetate	6298297	CCCCCCCCCCCCCCC(C(C(NC(=O)C)COC(=O)C)OC(=O)C)OC(=O)C			ChEMBLE_NTD	1	0.690476	0.845238	1	0
N-[1-methyl-2-(m-tolyl)ethyl]acetamide	6333061	CC(Cc1cccc(c1)C)NC(=O)C			ChEMBLE_NTD	1	0.690476	0.845238	1	0
N-[1-(2-methoxyphenyl)propan-2-yl]acetamide	6333369	COc1ccccc1CC(NC(=O)C)C			ChEMBLE_NTD	1	0.690476	0.845238	1	0
N-[1-(2-ethoxyphenyl)propan-2-yl]acetamide	6333649	CCOc1ccccc1CC(NC(=O)C)C			ChEMBLE_NTD	1	0.690476	0.845238	1	0
Melatonin	1467881882	COc1ccc2c(c1)c(CCNC(=O)C)c[nH]2		C01598,D08170	ChEMBLE_NTD,CHEMBL45	1	0.690476	0.845238	1	0
6-Hydroxymelatonin	1467911068	COc1cc2c(CCNC(=O)C)c[nH]c2cc1O		C05643	CHEMBL127421	1	0.690476	0.845238	1	0
N-(3-oxo-2-thiolanyl)acetamide	29149	CC(=O)NC1SCCC1=O			ChEMBLE_NTD	1	0.642857	0.821429	1	0
(4R)-4-[(2R)-2-acetamido-1-oxo-3-phenylpropoxy]-4-[(2R)-2-methyl-2-oxiranyl]-2-butenoic acid methyl ester	2407837	COC(=O)C=CC(C1(C)CO1)OC(=O)C(Cc1ccccc1)NC(=O)C			ChEMBLE_NTD	1	0.642857	0.821429	1	0
N-[(1R,2S)-1-hydroxy-1-phenylpropan-2-yl]acetamide	2689389	OC(c1ccccc1)C(NC(=O)C)C			ChEMBLE_NTD	1	0.642857	0.821429	1	0
2-acetamido-3-phenyl-N-(p-tolyl)propanamide	3458602	CC(=O)NC(C(=O)Nc1ccc(cc1)C)Cc1ccccc1			ChEMBLE_NTD	1	0.642857	0.821429	1	0
N-(1-formyl-3,4,5-trihydroxy-pentyl)acetamide	6284212	O=CC(CC(C(CO)O)O)NC(=O)C			ChEMBLE_NTD	1	0.642857	0.821429	1	0
N-(5-hydroxypentan-2-yl)acetamide	6328737	CC(NC(=O)C)CCCO			ChEMBLE_NTD	1	0.642857	0.821429	1	0
N-[1-methyl-2-(p-tolyl)ethyl]acetamide	6333050	CC(Cc1ccc(cc1)C)NC(=O)C			ChEMBLE_NTD	1	0.642857	0.821429	1	0
(2S)-2-acetamido-N-[(2S)-1-amino-1-oxo-3-[4-[(5S)-1,1,3-trioxo-1,2-thiazolidin-5-yl]phenyl]propan-2-yl]-3-phenylpropanamide	92781264	NC(=O)C(Cc1ccc(cc1)C1CC(=O)NS1(=O)=O)NC(=O)C(Cc1ccccc1)NC(=O)C	DB08003		CHEMBL2297013,CHEMBL373105,CHEMBL382311	1	0.642857	0.821429	1	0
4-(beta-Acetylaminoethyl)imidazole	1467907239	CC(=O)NCCc1c[nH]cn1	DB04622	C05135	CHEMBL1230893	1	0.642857	0.821429	1	0
luzindole	1468371857	CC(=O)NCCc1c(Cc2ccccc2)[nH]c2c1cccc2			ChEMBLE MALARIA,CHEMBL286615	1	0.642857	0.821429	1	0
S20098	1468619489	COc1ccc2c(c1)c(CCNC(=O)C)ccc2	DB06594	D02578	CHEMBL10878	1	0.640476	0.820238	1	0
N-(2-oxochromen-3-yl)acetamide	2480835	CC(=O)Nc1cc2ccccc2oc1=O			ChEMBLE_NTD,CHEMBL63349	1	0.619048	0.809524	1	0
N-(3-cyano-4,5,6,7-tetrahydrobenzothiophen-2-yl)acetamide	3976470	N#Cc1c(NC(=O)C)sc2c1CCCC2			ChEMBLE_NTD,CHEMBL1412798	1	0.619048	0.809524	1	0
[4-(2-acetamido-1-acetoxy-ethyl)-2-methoxy-phenyl] acetate	6313395	COc1cc(ccc1OC(=O)C)C(OC(=O)C)CNC(=O)C			ChEMBLE_NTD	1	0.619048	0.809524	1	0
[4-(acetamidomethyl)phenyl]arsonic acid	3309474	CC(=O)NCc1ccc(cc1)[As](=O)(O)O			ChEMBLE_NTD	1	0.607143	0.803571	1	0
N-[[4-(hexylcarbamoylsulfamoyl)phenyl]methyl]acetamide	6256757	CCCCCCNC(=O)NS(=O)(=O)c1ccc(cc1)CNC(=O)C			ChEMBLE_NTD	1	0.607143	0.803571	1	0
N-[[4-(propylcarbamoylsulfamoyl)phenyl]methyl]acetamide	6256768	CCCNC(=O)NS(=O)(=O)c1ccc(cc1)CNC(=O)C			ChEMBLE_NTD	1	0.607143	0.803571	1	0
N-(2-ethylphenyl)acetamide	365732	CCc1ccccc1NC(=O)C			ChEMBLE_NTD,CHEMBL531777	1	0.595238	0.797619	1	0
trimethylsilyl 2-acetamido-3-(1-trimethylsilylindol-3-yl)propanoate	6220934	CC(=O)NC(C(=O)O[Si](C)(C)C)Cc1cn(c2c1cccc2)[Si](C)(C)C			ChEMBLE_NTD	1	0.595238	0.797619	1	0
N-[3-(azepane-1-carbonyl)-4-phenyl-2-thienyl]acetamide	6301715	CC(=O)Nc1scc(c1C(=O)N1CCCCCC1)c1ccccc1			ChEMBLE_NTD	1	0.595238	0.797619	1	0
N-[1-(6-methoxy-1,3-benzodioxol-5-yl)propan-2-yl]acetamide	6334294	CC(NC(=O)C)Cc1cc2OCOc2cc1OC			ChEMBLE_NTD	1	0.595238	0.797619	1	0
N-[1-(4-ethyl-2,5-dimethoxyphenyl)propan-2-yl]acetamide	6334475	COc1cc(CC)c(cc1CC(NC(=O)C)C)OC			ChEMBLE_NTD	1	0.595238	0.797619	1	0
N-[4-(benzylamino)-2-oxo-thiochromen-3-yl]acetamide	8564116	CC(=O)Nc1c(=O)sc2c(c1NCc1ccccc1)cccc2			ChEMBLE_NTD,CHEMBL601781	1	0.595238	0.797619	1	0
N-[2-chloro-4-[(2,4-dimethoxyphenyl)methyleneamino]phenyl]acetamide	6283518	COc1cc(OC)ccc1C=Nc1ccc(c(c1)Cl)NC(=O)C			ChEMBLE_NTD	1	0.583333	0.791667	1	0
tacedinaline	1468360677	CC(=O)Nc1ccc(cc1)C(=O)Nc1ccccc1N	DB12291	D05988	CHEMBL235191	1	0.583333	0.791667	1	0
N-[3,4,5-trihydroxy-1-oxo-6-[[3,4,5-trihydroxy-6-(hydroxymethyl)-2-oxanyl]oxy]hexan-2-yl]acetamide	16163	O=CC(C(C(C(COC1OC(CO)C(C(C1O)O)O)O)O)O)NC(=O)C			ChEMBLE_NTD	1	0.571429	0.785714	1	0
N-(3-diethoxyphosphorylpropyl)acetamide	3615075	CCOP(=O)(OCC)CCCNC(=O)C			ChEMBLE_NTD	1	0.571429	0.785714	1	0
2-acetamido-N-benzyl-5-[[methyl(nitroso)carbamoyl]-propyl-amino]pentanamide	4764883	CCCN(C(=O)N(N=O)C)CCCC(C(=O)NCc1ccccc1)NC(=O)C			ChEMBLE_NTD,CHEMBL1981869	1	0.571429	0.785714	1	0
N-[5-(1,2-dihydroxyethyl)-3-furyl]acetamide	6284104	OCC(c1occ(c1)NC(=O)C)O			ChEMBLE_NTD	1	0.571429	0.785714	1	0
N-(4-hydroxycyclohex-2-en-1-yl)acetamide	6300956	CC(=O)NC1CCC(C=C1)O			ChEMBLE_NTD	1	0.571429	0.785714	1	0
N-(4-oxocyclohexyl)acetamide	6301184	O=C1CCC(CC1)NC(=O)C			ChEMBLE_NTD	1	0.571429	0.785714	1	0
N-(4,7-dioxo-1,3-dihydro-2,1,3-benzoxadiazol-5-yl)acetamide	6315131	CC(=O)NC1=CC(=O)C2=C(C1=O)NON2			ChEMBLE_NTD	1	0.571429	0.785714	1	0
(Z)-4-(ethylamino)-4-oxo-2-butenoic acid methyl ester	60774132	CC(=O)NCC1C(=O)OC2C1CCC(=CCCC1(C2O1)C)C			ChEMBLE_NTD,CHEMBL519906	1	0.571429	0.785714	1	0
(3R,6S,9S,12S,23S)-15-[[(2S)-2-acetamidohexanoyl]amino]-9-benzyl-6-(3-guanidinopropyl)-12-(1H-imidazol-5-ylmethyl)-3-(1H-indol-3-ylmethyl)-2,5,8,11,14,17-hexaoxo-1,4,7,10,13,18-hexazacyclotricosane-23-carboxylic acid	60848832	CCCCC(C(=O)NC1CC(=O)NCCCCC(NC(=O)C(NC(=O)C(NC(=O)C(NC(=O)C(NC1=O)Cc1[nH]cnc1)Cc1ccccc1)CCCN=C(N)N)Cc1c[nH]c2c1cccc2)C(=O)O)NC(=O)C		D06569	CHEMBL2070241	1	0.571429	0.785714	1	0
(2R)-1-[(2R)-1-[(2R)-2-acetamido-3-(4-hydroxyphenyl)propanoyl]pyrrolidine-2-carbonyl]-N-[2-[[(1R)-2-[(2-amino-2-oxo-ethyl)amino]-1-methyl-2-oxo-ethyl]amino]-2-oxo-ethyl]-4-hydroxy-pyrrolidine-2-carboxamide	95180811	OC1CC(N(C1)C(=O)C1CCCN1C(=O)C(Cc1ccc(cc1)O)NC(=O)C)C(=O)NCC(=O)NC(C(=O)NCC(=O)N)C		D05767	CHEMBL450656	1	0.571429	0.785714	1	0
N1-Acetylspermidine	1467872821	[N+]CCCC[N+]CCCNC(=O)C		C00612	CHEMBL176800	1	0.571429	0.785714	1	0
Ac-Tyr-OEt	1467882361	CCOC(=O)C(Cc1ccc(cc1)O)NC(=O)C		C01657	ChEMBLE_NTD,CHEMBL1354672,CHEMBL3278820,CHEMBL57662	1	0.571429	0.785714	1	0
Acetanilide	1467927844	CC(=O)Nc1ccccc1		C07565	ChEMBLE_NTD,CHEMBL269644	1	0.571429	0.785714	1	0
N-[4-(2-phenylimidazo[2,1-b][1,3,4]thiadiazol-6-yl)phenyl]acetamide	6307059	CC(=O)Nc1ccc(cc1)c1cn2c(n1)sc(n2)c1ccccc1			ChEMBLE_NTD	1	0.564286	0.782143	1	0
N-[4-(3-amino-1H-pyrazol-5-yl)phenyl]acetamide	6315957	CC(=O)Nc1ccc(cc1)c1[nH]nc(c1)N			ChEMBLE_NTD	1	0.564286	0.782143	1	0
2-acetamido-N1,N4-bis[4-(4,5-dihydro-1H-imidazol-2-yl)phenyl]terephthalamide	5181426	CC(=O)Nc1cc(ccc1C(=O)Nc1ccc(cc1)C1=NCCN1)C(=O)Nc1ccc(cc1)C1=NCCN1			ChEMBLE_NTD,CHEMBL535197	1	0.559524	0.779762	1	0
apremilast	1468315583	CCOc1cc(ccc1OC)C(N1C(=O)c2c(C1=O)c(ccc2)NC(=O)C)CS(=O)(=O)C		D08860	CHEMBL473204,CHEMBL475165,CHEMBL514800	1	0.559524	0.779762	1	0
2-[2-(3-acetamido-2,4,6-triiodophenoxy)ethoxymethyl]butanoic acid	379939	CCC(C(=O)O)COCCOc1c(I)cc(c(c1I)NC(=O)C)I		D04585	CHEMBL2105012	1	0.547619	0.77381	1	0
N-(3-acetamido-2-oxo-chromen-6-yl)-2,2,2-trichloro-acetamide	4469992	CC(=O)Nc1cc2cc(ccc2oc1=O)NC(=O)C(Cl)(Cl)Cl			ChEMBLE_NTD	1	0.547619	0.77381	1	0
N-(3-acetamidophenyl)-2,4-dichlorobenzamide	6315891	CC(=O)Nc1cccc(c1)NC(=O)c1ccc(cc1Cl)Cl			ChEMBLE_NTD	1	0.547619	0.77381	1	0
N-(3-acetamidophenyl)-4,5-dihydro-1H-imidazole-2-carboxamide	6321810	CC(=O)Nc1cccc(c1)NC(=O)C1=NCCN1			ChEMBLE_NTD	1	0.547619	0.77381	1	0
N-(3-acetamidophenyl)-2,2,2-trifluoroacetamide	9848433	CC(=O)Nc1cccc(c1)NC(=O)C(F)(F)F			ChEMBLE_NTD,CHEMBL527454	1	0.547619	0.77381	1	0
N-[4-methoxy-2-(2-oxo-1H-benzo[g]quinoxalin-3-yl)phenyl]acetamide	6306686	COc1ccc(c(c1)c1nc2cc3ccccc3cc2[nH]c1=O)NC(=O)C			ChEMBLE_NTD	1	0.540476	0.770238	1	0
3-acetamido-2-(3-amino-1,2-dihydroxypropyl)-4-hydroxy-3,4-dihydro-2H-pyran-6-carboxylic acid	20360	NCC(C(C1OC(=CC(C1NC(=O)C)O)C(=O)O)O)O	DB04227,EXPT00352		CHEMBL140830	1	0.535714	0.767857	1	0
2-[[4-[2-[2-[3-acetamido-2,5-dihydroxy-6-(hydroxymethyl)tetrahydropyran-4-yl]oxypropanoylamino]propanoylamino]-5-amino-5-oxo-pentanoyl]amino]-6-(octadecanoylamino)hexanoic acid	53263	CCCCCCCCCCCCCCCCCC(=O)NCCCCC(C(=O)O)NC(=O)CCC(C(=O)N)NC(=O)C(NC(=O)C(OC1C(NC(=O)C)C(O)OC(C1O)CO)C)C		D01722	CHEMBL1908331	1	0.535714	0.767857	1	0
(4-acetamidophenyl) 2-(diethylamino)acetate	681704	CCN(CC(=O)Oc1ccc(cc1)NC(=O)C)CC	DB09288	D07294	CHEMBL1851805	1	0.535714	0.767857	1	0
N-(4-sulfanylphenyl)acetamide	701957	CC(=O)Nc1ccc(cc1)S			ChEMBLE_NTD,CHEMBL120794	1	0.535714	0.767857	1	0
N-(4-acetamidophenyl)-3-oxobutanamide	1918665	CC(=O)CC(=O)Nc1ccc(cc1)NC(=O)C			ChEMBLE_NTD	1	0.535714	0.767857	1	0
7-[(4-acetamidophenyl)carbamoylamino]-4-hydroxy-naphthalene-2-sulfonic acid	1945902	O=C(Nc1ccc2c(c1)cc(cc2O)S(=O)(=O)O)Nc1ccc(cc1)NC(=O)C			ChEMBLE_NTD	1	0.535714	0.767857	1	0
N-[4-[(3,4-dimethylisoxazol-5-yl)sulfamoyl]phenyl]acetamide	2714221	CC(=O)Nc1ccc(cc1)S(=O)(=O)Nc1onc(c1C)C			ChEMBLE_NTD,CHEMBL725	1	0.535714	0.767857	1	0
(2S)-2-[[(2R,3S,4R,5R,6S)-5-acetamido-4,6-dihydroxy-2-(hydroxymethyl)-3-oxanyl]oxy]propanoic acid	2987096	OCC1OC(O)C(C(C1OC(C(=O)O)C)O)NC(=O)C			ChEMBLE_NTD	1	0.535714	0.767857	1	0
N-(6-benzyloxy-8-hydroxy-2,2-dimethyl-4,4a,6,7,8,8a-hexahydropyrano[3,2-d][1,3]dioxin-7-yl)acetamide	4218017	CC(=O)NC1C(OCc2ccccc2)OC2C(C1O)OC(OC2)(C)C			ChEMBLE_NTD,CHEMBL1897516	1	0.535714	0.767857	1	0
N-[4-(3-oxoazetidin-1-yl)sulfonylphenyl]acetamide	6272617	O=C1CN(C1)S(=O)(=O)c1ccc(cc1)NC(=O)C			ChEMBLE_NTD	1	0.535714	0.767857	1	0
N-[4-(3-oxopyrrolidin-1-yl)sulfonylphenyl]acetamide	6273011	O=C1CCN(C1)S(=O)(=O)c1ccc(cc1)NC(=O)C			ChEMBLE_NTD	1	0.535714	0.767857	1	0
N-[4-(1,1-dimethyl-3-oxo-butyl)sulfonylphenyl]acetamide	6279088	CC(=O)CC(S(=O)(=O)c1ccc(cc1)NC(=O)C)(C)C			ChEMBLE_NTD,CHEMBL1432167	1	0.535714	0.767857	1	0
N-[4,5-dihydroxy-6-(hydroxymethyl)-2-(methylthio)-3-oxanyl]acetamide	6290967	CSC1OC(CO)C(C(C1NC(=O)C)O)O			ChEMBLE_NTD	1	0.535714	0.767857	1	0
N-(7-bicyclo[2.2.1]hept-2-enyl)acetamide	6291132	CC(=O)NC1C2CCC1C=C2			ChEMBLE_NTD	1	0.535714	0.767857	1	0
[2-(4-acetamido-3-acetoxy-5-benzyloxy-tetrahydrofuran-2-yl)-2-acetoxy-ethyl] acetate	6300435	CC(=O)NC1C(OCc2ccccc2)OC(C1OC(=O)C)C(OC(=O)C)COC(=O)C			ChEMBLE_NTD	1	0.535714	0.767857	1	0
N-[4-(3-pyridylmethylsulfamoyl)phenyl]acetamide	6300554	CC(=O)Nc1ccc(cc1)S(=O)(=O)NCc1cccnc1			ChEMBLE_NTD,CHEMBL1529844	1	0.535714	0.767857	1	0
[5-acetamido-4-acetoxy-6-methoxy-2-(methoxymethyl)tetrahydropyran-3-yl] acetate	6302898	COCC1OC(OC)C(C(C1OC(=O)C)OC(=O)C)NC(=O)C			ChEMBLE_NTD	1	0.535714	0.767857	1	0
[3-acetamido-4,5-diacetoxy-6-(acetoxymethyl)tetrahydropyran-2-yl] benzoate	6303776	CC(=O)OCC1OC(OC(=O)c2ccccc2)C(C(C1OC(=O)C)OC(=O)C)NC(=O)C			ChEMBLE_NTD	1	0.535714	0.767857	1	0
N-[4-(3,4-dichlorophenyl)sulfonylphenyl]acetamide	6304669	CC(=O)Nc1ccc(cc1)S(=O)(=O)c1ccc(c(c1)Cl)Cl			ChEMBLE_NTD	1	0.535714	0.767857	1	0
N-[4-[(3,5-dichloro-2,6-dimethyl-4-pyridyl)sulfinyl]phenyl]acetamide	6311730	CC(=O)Nc1ccc(cc1)S(=O)c1c(Cl)c(C)nc(c1Cl)C			ChEMBLE_NTD	1	0.535714	0.767857	1	0
acetic acid [5-acetamido-3,4-diacetyloxy-6-(acetylthio)-2-oxanyl]methyl ester	6312939	CC(=O)OCC1OC(SC(=O)C)C(C(C1OC(=O)C)OC(=O)C)NC(=O)C			ChEMBLE_NTD	1	0.535714	0.767857	1	0
2-[(4-acetamidophenyl)sulfonylamino]butanoic acid	6318192	CCC(C(=O)O)NS(=O)(=O)c1ccc(cc1)NC(=O)C			ChEMBLE_NTD,CHEMBL1509054	1	0.535714	0.767857	1	0
N-[4-[(3-chloro-2-methylphenyl)sulfamoyl]phenyl]acetamide	6318258	CC(=O)Nc1ccc(cc1)S(=O)(=O)Nc1cccc(c1C)Cl			ChEMBLE_NTD	1	0.535714	0.767857	1	0
N-[4-[(3-chloro-4-cyanophenyl)sulfamoyl]phenyl]acetamide	6318269	N#Cc1ccc(cc1Cl)NS(=O)(=O)c1ccc(cc1)NC(=O)C			ChEMBLE_NTD	1	0.535714	0.767857	1	0
N-[4-[(3,5-dichloro-2,6-dimethyl-4-pyridinyl)thio]phenyl]acetamide	6324623	CC(=O)Nc1ccc(cc1)Sc1c(Cl)c(C)nc(c1Cl)C			ChEMBLE_NTD	1	0.535714	0.767857	1	0
N-[4-(1,3-benzothiazol-2-ylsulfamoyl)phenyl]acetamide	6326451	CC(=O)Nc1ccc(cc1)S(=O)(=O)Nc1nc2c(s1)cccc2			ChEMBLE_NTD,CHEMBL1427098	1	0.535714	0.767857	1	0
N-[4-[4-(4-methylpiperazin-1-yl)phenyl]sulfonylphenyl]acetamide	6327198	CN1CCN(CC1)c1ccc(cc1)S(=O)(=O)c1ccc(cc1)NC(=O)C			ChEMBLE_NTD	1	0.535714	0.767857	1	0
N-[4-[[(1S,2R,4R)-1,3,3-trimethylnorbornan-2-yl]sulfamoyl]phenyl]acetamide	10726569	CC(=O)Nc1ccc(cc1)S(=O)(=O)NC1C2(C)CCC(C1(C)C)C2			ChEMBLE_NTD,CHEMBL1502934,CHEMBL600541	1	0.535714	0.767857	1	0
N-[4-[(carbamothioylhydrazono)methyl]phenyl]acetamide	26197113	CC(=O)Nc1ccc(cc1)C=NNC(=S)N	DB12829	D08584	CHEMBL375492	1	0.535714	0.767857	1	0
N-[4-[[(4-fluorophenyl)carbamothioylhydrazono]methyl]phenyl]acetamide	32512018	S=C(Nc1ccc(cc1)F)NN=Cc1ccc(cc1)NC(=O)C			ChEMBLE_NTD	1	0.535714	0.767857	1	0
(5Z)-N-(4-acetamidophenyl)-5-(3-chloro-6-oxo-1-cyclohexa-2,4-dienylidene)-1,2-dihydropyrazole-3-carboxamide	55101013	CC(=O)Nc1ccc(cc1)NC(=O)c1[nH][nH]c(=C2C=C(Cl)C=CC2=O)c1			ChEMBLE_NTD	1	0.535714	0.767857	1	0
N-[(2R,3R,4R,5S,6R)-2,4-dimethoxy-6-(methoxymethyl)-5-[[(2S,3S,4S,5R,6R)-3,4,5-trimethoxy-6-(methoxymethyl)-2-oxanyl]oxy]-3-oxanyl]acetamide	60616678	COCC1OC(OC)C(C(C1OC1OC(COC)C(C(C1OC)OC)OC)OC)NC(=O)C			ChEMBLE_NTD	1	0.535714	0.767857	1	0
N-[4-[2-(4-bromophenyl)-4-oxo-3-thiazolidinyl]phenyl]acetamide	63409799	CC(=O)Nc1ccc(cc1)N1C(=O)CSC1c1ccc(cc1)Br			ChEMBLE_NTD,CHEMBL596834	1	0.535714	0.767857	1	0
N-Acetyl-D-glucosamine	1467867422	OCC1OC(O)C(C(C1O)O)NC(=O)C	DB03109,EXPT02281	C00140,C00645,C01132,C02711,C03136,C03878,C05021,C20328,C21036,C21039,C21049,C21052,C21061	ChEMBLE_NTD,CHEMBL1210905,CHEMBL1231391,CHEMBL1414815,CHEMBL240524,CHEMBL39064,CHEMBL447878,CHEMBL469447,CHEMBL83479	1	0.535714	0.767857	1	0
2-Deoxy-2,3-dehydro-N-acetylneuraminic acid	1467904028	OCC(C(C1OC(=CC(C1NC(=O)C)O)C(=O)O)O)O		C04580	CHEMBL1161589,CHEMBL116550,CHEMBL291345,CHEMBL334952,CHEMBL416139,CHEMBL77627,CHEMBL96712	1	0.535714	0.767857	1	0
UDP-N-acetyl-D-galactosamine 4,6-bissulfate	1467904102	CC(=O)NC1C(OC(C(C1O)OS(=O)(=O)O)COS(=O)(=O)O)OP(=O)(OP(=O)(OCC1OC(C(C1O)O)n1ccc(=O)[nH]c1=O)O)O		C04589	ChEMBLE_NTD	1	0.535714	0.767857	1	0
UDP-N-acetyl-3-(1-carboxyvinyl)-D-glucosamine	1467904382	OCC1OC(OP(=O)(OP(=O)(OCC2OC(C(C2O)O)n2ccc(=O)[nH]c2=O)O)O)C(C(C1O)OC(=C)C(=O)O)NC(=O)C		C04631	ChEMBLE_NTD	1	0.535714	0.767857	1	0
UDP-N-acetylmuramoyl-L-alanyl-alpha-D-glutamyl-L-lysine	1467904948	NCCCCC(C(=O)O)NC(=O)C(NC(=O)C(NC(=O)C(OC1C(O)C(CO)OC(C1NC(=O)C)OP(=O)(OP(=O)(OCC1OC(C(C1O)O)n1ccc(=O)[nH]c1=O)O)O)C)C)CCC(=O)O		C04700	ChEMBLE_NTD	1	0.535714	0.767857	1	0
UDP-N-acetyl-6-(alpha-D-galactose-1-phospho)-alpha-D-glucosamine	1467905283	OCC1OC(OP(=O)(OCC2OC(OP(=O)(OP(=O)(OCC3OC(C(C3O)O)n3ccc(=O)[nH]c3=O)O)O)C(C(C2O)O)NC(=O)C)O)C(C(C1O)O)O		C04739	ChEMBLE_NTD	1	0.535714	0.767857	1	0
UDP-N-acetylmuramoyl-L-alanyl-gamma-D-glutamyl-meso-2,6-diaminopimelate	1467906255	OCC1OC(OP(=O)(OP(=O)(OCC2OC(C(C2O)O)n2ccc(=O)[nH]c2=O)[O-])[O-])C(C(C1O)OC(C(=O)NC(C(=O)NC(C(=O)[O-])CCC(=O)NC(C(=O)[O-])CCCC(C(=O)[O-])[N+])C)C)NC(=O)C		C04877,C20886	CHEMBL1779332	1	0.535714	0.767857	1	0
UDP-N-acetylmuramoyl-L-alanyl-gamma-D-glutamyl-L-lysine	1467912980	OCC1OC(OP(=O)(OP(=O)(OCC2OC(C(C2O)O)n2ccc(=O)[nH]c2=O)[O-])[O-])C(C(C1O)OC(C(=O)NC(C(=O)NC(C(=O)[O-])CCC(=O)NC(C(=O)[O-])CCCC[N+])C)C)NC(=O)C		C05892	CHEMBL1777829	1	0.535714	0.767857	1	0
Lacto-N-tetraose	1467917194	OCC1OC(OC2C(CO)OC(C(C2O)O)O)C(C(C1O)OC1OC(CO)C(C(C1NC(=O)C)OC1OC(CO)C(C(C1O)O)O)O)O		C06371	CHEMBL595538	1	0.535714	0.767857	1	0
Lacto-N-biose	1467917204	OCC1OC(O)C(C(C1O)OC1OC(CO)C(C(C1O)O)O)NC(=O)C		C06372,C07278	CHEMBL2303675,CHEMBL443119,CHEMBL469451	1	0.535714	0.767857	1	0
Phenacetin	1467928107	CCOc1ccc(cc1)NC(=O)C		C07591,D00569	ChEMBLE_NTD,CHEMBL16073	1	0.535714	0.767857	1	0
Zanamivir	1467931432	OCC(C(C1OC(=CC(C1NC(=O)C)NC(=N)N)C(=O)O)O)O		C08095,D00902	CHEMBL127235,CHEMBL1357654,CHEMBL157939,CHEMBL1673195,CHEMBL174747,CHEMBL193303,CHEMBL222813,CHEMBL300502,CHEMBL3348924	1	0.535714	0.767857	1	0
Aridanin	1467940596	OCC1OC(OC2CCC3(C(C2(C)C)CCC2(C3CC=C3C2(C)CCC2(C3CC(C)(C)CC2)C(=O)O)C)C)C(C(C1O)O)NC(=O)C		C08922	CHEMBL506209	1	0.535714	0.767857	1	0
Practolol	1467972878	OC(COc1ccc(cc1)NC(=O)C)CNC(C)C		C11696,D05587	ChEMBLE_NTD,CHEMBL1358416,CHEMBL6995	1	0.535714	0.767857	1	0
Acetylsulfamethoxazole	1467982630	CC(=O)Nc1ccc(cc1)S(=O)(=O)Nc1noc(c1)C		C13061,D01601	CHEMBL3560298	1	0.535714	0.767857	1	0
Teicoplanin A2-4	1467983927	CCC(CCCCCCC(=O)NC1C(OC(C(C1O)O)CO)Oc1c2cc3cc1Oc1ccc(cc1Cl)CC1C(=O)NC(C(=O)NC3C(=O)NC3C(=O)NC(C(c4ccc(O2)c(Cl)c4)OC2OC(CO)C(C(C2NC(=O)C)O)O)C(=O)NC(c2c(c4cc3ccc4O)c(cc(c2)O)OC2OC(CO)C(C(C2O)O)O)C(=O)O)c2cc(O)cc(c2)Oc2cc(C(C(=O)N1)N)ccc2O)C		C13610	CHEMBL2105818	1	0.535714	0.767857	1	0
Teicoplanin A2-5	1467983938	OCC1OC(Oc2c3cc4cc2Oc2ccc(cc2Cl)CC2C(=O)NC(C(=O)NC4C(=O)NC4C(=O)NC(C(c5ccc(O3)c(Cl)c5)OC3OC(CO)C(C(C3NC(=O)C)O)O)C(=O)NC(c3c(c5cc4ccc5O)c(cc(c3)O)OC3OC(CO)C(C(C3O)O)O)C(=O)O)c3cc(O)cc(c3)Oc3cc(C(C(=O)N2)N)ccc3O)C(C(C1O)O)NC(=O)CCCCCCCC(C)C		C13612	CHEMBL2103966,CHEMBL3348961	1	0.535714	0.767857	1	0
Teicoplanin A3-1	1467983949	OCC1OC(OC2c3ccc(c(c3)Cl)Oc3cc4C(C(=O)NC5C(=O)NC2C(=O)NC(C(=O)O)c2cc(O)cc(c2c2cc5ccc2O)OC2OC(CO)C(C(C2O)O)O)NC(=O)C2NC(=O)C(Cc5ccc(Oc(c3O)c4)c(Cl)c5)NC(=O)C(N)c3cc(Oc4cc2cc(O)c4)c(O)cc3)C(C(C1O)O)NC(=O)C		C13613	CHEMBL2105780,CHEMBL2367634	1	0.535714	0.767857	1	0
4-Chloroacetanilide	1467991745	CC(=O)Nc1ccc(cc1)Cl		C14494	CHEMBL15991	1	0.535714	0.767857	1	0
Disperse Yellow 3	1468037149	CC(=O)Nc1ccc(cc1)N=Nc1cc(C)ccc1O		C19412	CHEMBL1590721	1	0.535714	0.767857	1	0
1-O-[2-(Acetylamino)-2-deoxy-alpha-D-glucopyranosyl]-D-myo-Inositol	1468040342	OCC1OC(OC2C(O)C(O)C(C(C2O)O)O)C(C(C1O)O)NC(=O)C		C19784	CHEMBL1093122	1	0.535714	0.767857	1	0
abarelix	1468383959	OCC(C(=O)N(C(C(=O)NC(C(=O)NC(C(=O)NC(C(=O)N1CCCC1C(=O)NC(C(=O)N)C)CCCCNC(C)C)CC(C)C)CC(=O)N)Cc1ccc(cc1)O)C)NC(=O)C(NC(=O)C(NC(=O)C(Cc1ccc2c(c1)cccc2)NC(=O)C)Cc1ccc(cc1)Cl)Cc1cccnc1		D02738	CHEMBL1252	1	0.533333	0.766667	1	0
Degarelix	1468619625	OCC(C(=O)NC(C(=O)NC(C(=O)NC(C(=O)NC(C(=O)N1CCCC1C(=O)NC(C(=O)N)C)CCCCNC(C)C)CC(C)C)Cc1ccc(cc1)NC(=O)N)Cc1ccc(cc1)NC(=O)C1CC(=O)NC(=O)N1)NC(=O)C(NC(=O)C(NC(=O)C(Cc1ccc2c(c1)cccc2)NC(=O)C)Cc1ccc(cc1)Cl)Cc1cccnc1		D08901	ChEMBLE_NTD,CHEMBL415606,CHEMBL444381	1	0.533333	0.766667	1	0
(3-acetamido-4-hydroxyphenyl)arsonic acid	20875	CC(=O)Nc1cc(ccc1O)[As](=O)(O)O		D07110	ChEMBLE_NTD,CHEMBL1330792	1	0.52381	0.761905	1	0
N-(5-oxo-7-oxabicyclo[4.1.0]heptan-2-yl)acetamide	6288346	CC(=O)NC1CCC(=O)C2C1O2			ChEMBLE_NTD	1	0.52381	0.761905	1	0
diethyl 2-acetamido-2-[3-(2-oxooxazolidin-3-yl)propyl]propanedioate	6288445	CCOC(=O)C(C(=O)OCC)(NC(=O)C)CCCN1CCOC1=O			ChEMBLE_NTD	1	0.52381	0.761905	1	0
ethyl N-[1-(3-acetamidophenyl)ethylideneamino]carbamate	6316100	CCOC(=O)NN=C(c1cccc(c1)NC(=O)C)C			ChEMBLE_NTD	1	0.52381	0.761905	1	0
ethyl 2-acetamido-6-isopropyl-5,7-dihydro-4H-thieno[2,3-c]pyridine-3-carboxylate	41226851	CCOC(=O)c1c(NC(=O)C)sc2c1CCN(C2)C(C)C			ChEMBLE_NTD,CHEMBL531190	1	0.52381	0.761905	1	0
N-[4-[(1-allyl-3-butyl-2,6-dioxo-7H-purin-8-yl)methyl]phenyl]acetamide	5472482	CCCCn1c2nc([nH]c2c(=O)n(c1=O)CC=C)Cc1ccc(cc1)NC(=O)C	DB03267,EXPT03126		CHEMBL120293	1	0.511905	0.755952	1	0
N-[[(5S)-3-[3-fluoro-4-[4-(2-hydroxyacetyl)piperazin-1-yl]phenyl]-2-oxo-oxazolidin-5-yl]methyl]acetamide	724446	OCC(=O)N1CCN(CC1)c1ccc(cc1F)N1CC(OC1=O)CNC(=O)C		D04017	CHEMBL47955	1	0.5	0.75	1	0
N-[[(5S)-3-(3-fluoro-4-thiomorpholino-phenyl)-2-oxo-oxazolidin-5-yl]methyl]acetamide	5637680	CC(=O)NCC1OC(=O)N(C1)c1ccc(c(c1)F)N1CCSCC1		D10167	ChEMBLE_NTD,CHEMBL288149	1	0.5	0.75	1	0
N-(3-methyl-2-oxobutyl)acetamide	6278013	CC(=O)NCC(=O)C(C)C			ChEMBLE_NTD	1	0.5	0.75	1	0
ethyl 2-acetamido-3-(1H-imidazol-5-yl)propanoate	6283005	CC(=O)NC(C(=O)OCC)Cc1cnc[nH]1			ChEMBLE_NTD	1	0.5	0.75	1	0
ethyl 2-acetamido-6-bromo-7-methoxy-benzothiophene-3-carboxylate	6323932	CCOC(=O)c1c(NC(=O)C)sc2c1ccc(c2OC)Br			ChEMBLE_NTD,CHEMBL1459687	1	0.5	0.75	1	0
N-[(4Z)-1-cyclooct-4-enyl]acetamide	53409657	CC(=O)NC1CCCC=CCC1			ChEMBLE_NTD	1	0.5	0.75	1	0
N-[[3-[3-fluoro-4-[4-(hydroxymethyl)phenyl]phenyl]-2-oxo-5-oxazolidinyl]methyl]acetamide	183381333	OCc1ccc(cc1)c1ccc(cc1F)N1CC(OC1=O)CNC(=O)C			ChEMBLE_NTD,CHEMBL3637851	1	0.5	0.75	1	0
N-[(1R,2R)-1-(4-acetamidophenyl)-1,3-dihydroxypropan-2-yl]-2,2-dichloroacetamide	2980934	OCC(C(c1ccc(cc1)NC(=O)C)O)NC(=O)C(Cl)Cl			ChEMBLE_NTD	1	0.492857	0.746429	1	0
Acetrizoic acid	1467988186	CC(=O)Nc1c(I)cc(c(c1I)C(=O)O)I		C14164,D02457	ChEMBLE_NTD,CHEMBL1201327	1	0.492857	0.746429	1	0
N-(5-amino-2,4-dimethylphenyl)acetamide	2183501	CC(=O)Nc1cc(N)c(cc1C)C			ChEMBLE_NTD	1	0.488095	0.744048	1	0
N-(7-methoxyquinoxalin-6-yl)acetamide	6316122	COc1cc2nccnc2cc1NC(=O)C			ChEMBLE_NTD	1	0.488095	0.744048	1	0
N-(3,7,10-trimethyl-2,4-dioxo-8-benzo[g]pteridinyl)acetamide	6317235	CC(=O)Nc1cc2c(cc1C)nc1c(n2C)nc(=O)n(c1=O)C			ChEMBLE_NTD	1	0.488095	0.744048	1	0
N-[2-methoxy-5-(trifluoromethyl)phenyl]acetamide	6316221	COc1ccc(cc1NC(=O)C)C(F)(F)F			ChEMBLE_NTD	1	0.480952	0.740476	1	0
N-[3-[(carbamothioylhydrazono)methyl]phenyl]acetamide	32416741	CC(=O)Nc1cccc(c1)C=NNC(=S)N			ChEMBLE_NTD	1	0.47619	0.738095	1	0
N-[5-(2-fluorophenyl)-1-methyl-2-oxo-3H-1,4-benzodiazepin-7-yl]acetamide	6185901	CC(=O)Nc1ccc2c(c1)C(=NCC(=O)N2C)c1ccccc1F			ChEMBLE_NTD	1	0.469048	0.734524	1	0
dimethyl 4-acetamidobenzene-1,2-dicarboxylate	6316435	COC(=O)c1cc(ccc1C(=O)OC)NC(=O)C			ChEMBLE_NTD	1	0.469048	0.734524	1	0
ethyl 7-acetamido-2-amino-benzothiophene-3-carboxylate	6317544	CCOC(=O)c1c(N)sc2c1cccc2NC(=O)C			ChEMBLE_NTD,CHEMBL1489500	1	0.469048	0.734524	1	0
N-[2-acetamido-5-[(3,4,5-trimethoxyphenyl)methyl]pyrimidin-4-yl]acetamide	4075576	COc1cc(Cc2cnc(nc2NC(=O)C)NC(=O)C)cc(c1OC)OC			ChEMBLE_NTD	1	0.464286	0.732143	1	0
N-tetralin-6-ylacetamide	4071361	CC(=O)Nc1ccc2c(c1)CCCC2			ChEMBLE_NTD,CHEMBL601559	1	0.461905	0.730952	1	0
N-[4-(1-adamantyl)phenyl]acetamide	6282710	CC(=O)Nc1ccc(cc1)C12CC3CC(C2)CC(C1)C3			ChEMBLE_NTD,CHEMBL1547083	1	0.460884	0.730442	1	0
N-(6-methyl-1,2,3,4,5,7-hexahydrotricyclo[2.2.1.0^{2,6}]heptan-3-yl)acetamide	6304135	CC(=O)NC1C2CC3C1C3(C2)C			ChEMBLE_NTD	1	0.458333	0.729167	1	0
N-[4-[bis[4-(dimethylamino)phenyl]methyl]phenyl]acetamide	3462947	CC(=O)Nc1ccc(cc1)C(c1ccc(cc1)N(C)C)c1ccc(cc1)N(C)C			ChEMBLE_NTD	1	0.457143	0.728571	1	0
[4-(2-acetamidocyclopropyl)phenyl] acetate	6310165	CC(=O)NC1CC1c1ccc(cc1)OC(=O)C			ChEMBLE_NTD	1	0.452381	0.72619	1	0
N-(4-acetamido-2-cyano-3,6-dimethoxyphenyl)-2,2,2-trifluoroacetamide	6323548	COc1cc(NC(=O)C)c(c(c1NC(=O)C(F)(F)F)C#N)OC			ChEMBLE_NTD	1	0.452381	0.72619	1	0
N-[phenyl(3-pyridyl)methyl]acetamide	6334132	CC(=O)NC(c1cccnc1)c1ccccc1			ChEMBLE_NTD,CHEMBL1869849	1	0.452381	0.72619	1	0
(Ac)2-L-Lys-D-Ala-D-Ala	1467895348	CC(=O)NC(C(=O)NC(C(=O)NC(C(=O)O)C)C)CCCCNC(=O)C		C03326	ChEMBLE_NTD,CHEMBL1160427,CHEMBL353896	1	0.452381	0.72619	1	0
N-[7-(2-bromobenzoyl)-2,3-dihydro-1,4-benzodioxin-6-yl]acetamide	6300799	CC(=O)Nc1cc2OCCOc2cc1C(=O)c1ccccc1Br			ChEMBLE_NTD	1	0.445238	0.722619	1	0
N-[4-[3-(4-methoxyphenyl)prop-2-enoyl]phenyl]acetamide	6324442	COc1ccc(cc1)C=CC(=O)c1ccc(cc1)NC(=O)C			ChEMBLE_NTD	1	0.440476	0.720238	1	0
acetaminophen glutathione conjugate	1468136873	O=C(NC(C(=O)NCC(=O)O)CSc1cc(ccc1O)NC(=O)C)CCC(C(=O)O)N			CHEMBL3544870	1	0.440476	0.720238	1	0
4-acetamidobenzoate	1468163131	CC(=O)Nc1ccc(cc1)C(=O)O	DB04500,EXPT03145		CHEMBL112687	1	0.440476	0.720238	1	0
5,5-dimethyl-1-cyclohepta-1,3,6-trienecarboxylic acid	719216	COC1=CC2C(C1=O)C1=C2c2c(CCC1NC(=O)C)cc(c(c2OC)OC)OC			ChEMBLE_NTD,CHEMBL1742175,CHEMBL527025	1	0.431293	0.715646	1	0
[4-[2-[(2-acetamido-4-methylsulfanyl-butanoyl)amino]ethyl]-2-ethoxycarbonyloxy-phenyl] ethyl carbonate	33007	CSCCC(C(=O)NCCc1ccc(c(c1)OC(=O)OCC)OC(=O)OCC)NC(=O)C		D01903	CHEMBL2106351	1	0.428571	0.714286	1	0
3-acetamido-2,4,6-triiodo-5-(methylcarbamoyl)benzoic acid	39200	CNC(=O)c1c(I)c(NC(=O)C)c(c(c1I)C(=O)O)I	DB09133	D01258	CHEMBL1201300	1	0.428571	0.714286	1	0
N-(2-oxo-3-thiolanyl)acetamide	150013	CC(=O)NC1CCSC1=O		D07105	ChEMBLE_NTD,CHEMBL1741824,CHEMBL2104457	1	0.428571	0.714286	1	0
2-acetamidoethyl 2-(4-chlorophenyl)-2-[3-(trifluoromethyl)phenoxy]acetate	338161	CC(=O)NCCOC(=O)C(c1ccc(cc1)Cl)Oc1cccc(c1)C(F)(F)F		D04411	CHEMBL2103824,CHEMBL456071	1	0.428571	0.714286	1	0
ethyl 2-acetamidoacetate	738901	CCOC(=O)CNC(=O)C			CHEMBL3278870	1	0.428571	0.714286	1	0
2-acetamido-3-phenyl-2-propenoic acid methyl ester	4470179	COC(=O)C(=Cc1ccccc1)NC(=O)C			ChEMBLE_NTD	1	0.428571	0.714286	1	0
N-[2-[[5-methoxy-1-[4-(trifluoromethyl)phenyl]pentylidene]amino]oxyethyl]acetamide	6191826	COCCCCC(=NOCCNC(=O)C)c1ccc(cc1)C(F)(F)F			ChEMBLE_NTD	1	0.428571	0.714286	1	0
N-acetylpropanamide	6277548	CCC(=O)NC(=O)C			ChEMBLE_NTD	1	0.428571	0.714286	1	0
N-[2-(4-chlorophenoxy)ethyl]acetamide	6284234	CC(=O)NCCOc1ccc(cc1)Cl			ChEMBLE_NTD	1	0.428571	0.714286	1	0
4-acetamido-2-amino-1H-imidazole-5-carboxamide	6284278	CC(=O)Nc1nc([nH]c1C(=O)N)N			ChEMBLE_NTD	1	0.428571	0.714286	1	0
N-[2-(diisopropoxyphosphinothioyldisulfanyl)ethyl]acetamide	6284344	CC(=O)NCCSSP(=S)(OC(C)C)OC(C)C			ChEMBLE_NTD	1	0.428571	0.714286	1	0
N-(2-acetamidoethyl)-4-amino-1,2,5-oxadiazole-3-carboxamide	6294777	CC(=O)NCCNC(=O)c1nonc1N			ChEMBLE_NTD	1	0.428571	0.714286	1	0
2-acetamido-N-(3-hydroxypropyl)-3-phenyl-2-propenamide	6295543	OCCCNC(=O)C(=Cc1ccccc1)NC(=O)C			ChEMBLE_NTD	1	0.428571	0.714286	1	0
2-acetamido-4-methyl-2-pentenoic acid	6297317	CC(=O)NC(=CC(C)C)C(=O)O			ChEMBLE_NTD	1	0.428571	0.714286	1	0
N-[3,6-dioxo-4-(p-tolylsulfonylamino)cyclohexa-1,4-dien-1-yl]acetamide	6300146	CC(=O)NC1=CC(=O)C(=CC1=O)NS(=O)(=O)c1ccc(cc1)C			ChEMBLE_NTD	1	0.428571	0.714286	1	0
N-(1-cyano-2-methylbutyl)acetamide	6301704	CCC(C(NC(=O)C)C#N)C			ChEMBLE_NTD	1	0.428571	0.714286	1	0
N-(5-methylisoxazol-3-yl)acetamide	6301737	CC(=O)Nc1noc(c1)C			ChEMBLE_NTD	1	0.428571	0.714286	1	0
2-acetamido-N-(2-hydroxyethyl)-3-phenyl-2-propenamide	6307092	OCCNC(=O)C(=Cc1ccccc1)NC(=O)C			ChEMBLE_NTD,CHEMBL1716697	1	0.428571	0.714286	1	0
N-(6-chloropyrimidin-4-yl)acetamide	6309839	CC(=O)Nc1cc(Cl)ncn1			ChEMBLE_NTD	1	0.428571	0.714286	1	0
N-(3-cyano-4,5-dimethyl-2-thienyl)acetamide	6313243	N#Cc1c(NC(=O)C)sc(c1C)C			ChEMBLE_NTD	1	0.428571	0.714286	1	0
ethyl 4-acetamido-1,2,5-oxadiazole-3-carboxylate	6313975	CCOC(=O)c1nonc1NC(=O)C			ChEMBLE_NTD,CHEMBL1892986	1	0.428571	0.714286	1	0
2-acetamido-3-(2,3-dimethoxyphenyl)prop-2-enoic acid	6320406	COc1c(cccc1OC)C=C(C(=O)O)NC(=O)C			ChEMBLE_NTD	1	0.428571	0.714286	1	0
(E)-2-acetamido-3-[4-(difluoromethoxy)phenyl]prop-2-enoate	22680665	FC(Oc1ccc(cc1)C=C(C(=O)[O-])NC(=O)C)F			ChEMBLE_NTD,CHEMBL1334741,CHEMBL577421,CHEMBL582693	1	0.428571	0.714286	1	0
(E)-2-acetamido-N,N-dimethyl-3-(3,4,5-trimethoxyphenyl)prop-2-enamide	53408887	COc1cc(C=C(C(=O)N(C)C)NC(=O)C)cc(c1OC)OC			ChEMBLE_NTD	1	0.428571	0.714286	1	0
N-(2-acetamidoethyl)-3-[(2,3-dimethoxyphenyl)methylamino]-5-(dimethylsulfamoyl)benzamide	277875455	COc1cccc(c1OC)CNc1cc(cc(c1)S(=O)(=O)N(C)C)C(=O)NCCNC(=O)C			ChEMBLE_NTD,CHEMBL604566	1	0.428571	0.714286	1	0
N-Acetyl-L-aspartate	1467877141	OC(=O)CC(C(=O)O)NC(=O)C		C01042	ChEMBLE_NTD,CHEMBL1162493,CHEMBL1162494	1	0.428571	0.714286	1	0
Epithienamycin F	1468018631	CC(=O)NCCSC1=C(C(=O)O)N2C(C1)C(C2=O)C(OS(=O)(=O)O)C		C17399	CHEMBL1205319	1	0.428571	0.714286	1	0
AcAsn	1469350553	NC(=O)CC(C(=O)[O-])NC(=O)C			CHEMBL172478	1	0.428571	0.714286	1	0
5-acetamido-4,6,7,8,9-pentahydroxy-2-oxononanoic acid	4569385	OCC(C(C(C(C(CC(=O)C(=O)O)O)NC(=O)C)O)O)O		D11016	CHEMBL2105945	1	0.416667	0.708333	1	0
N-[9-[[4-(dimethylamino)phenyl]methylene]fluoren-2-yl]acetamide	3368236	CC(=O)Nc1ccc2c(c1)C(=Cc1ccc(cc1)N(C)C)c1c2cccc1			ChEMBLE_NTD	1	0.411508	0.705754	1	0
7-Hydroxy-2-acetamidofluorene	1467993251	CC(=O)Nc1ccc2c(c1)Cc1c2ccc(c1)O		C14633	CHEMBL1908054	1	0.411508	0.705754	1	0
N-[1-[3-amino-13-(hydroxymethyl)-10-methyl-2,3,4,5,6,7,8,9,11,12,14,15,16,17-tetradecahydro-1H-cyclopenta[a]phenanthren-17-yl]ethyl]acetamide	6331902	OCC12CCC3C(C2CCC1C(NC(=O)C)C)CCC1C3(C)CCC(C1)N			ChEMBLE_NTD	1	0.410317	0.705159	1	0
5-Hydroxy-2-acetamidofluorene	1467993748	CC(=O)Nc1ccc2c(c1)Cc1c2c(O)ccc1		C14678	CHEMBL1908022	1	0.405736	0.702868	1	0
N-(4,5-dihydroxy-6-methoxy-3-oxanyl)acetamide	3626699	COC1OCC(C(C1O)O)NC(=O)C			ChEMBLE_NTD	1	0.404762	0.702381	1	0
2-acetamido-3-methylpentanoic acid methyl ester	6299244	CCC(C(C(=O)OC)NC(=O)C)C			ChEMBLE_NTD	1	0.404762	0.702381	1	0
2-acetamido-3,4,5-trihydroxy-6-oxohexanoic acid	6302078	O=CC(C(C(C(C(=O)O)NC(=O)C)O)O)O			ChEMBLE_NTD	1	0.404762	0.702381	1	0
2-acetamido-N,N-dicyclohexyl-3,4,5-trihydroxy-6-oxohexanamide	6311162	O=CC(C(C(C(C(=O)N(C1CCCCC1)C1CCCCC1)NC(=O)C)O)O)O			ChEMBLE_NTD	1	0.404762	0.702381	1	0
N-[3,5-difluoro-4-(2-oxiranylmethoxy)phenyl]acetamide	6312472	CC(=O)Nc1cc(F)c(c(c1)F)OCC1OC1			ChEMBLE_NTD	1	0.404762	0.702381	1	0
N-acetyl-L-isoleucine	1468118720	CCC(C(C(=O)O)NC(=O)C)C			CHEMBL1221841,CHEMBL173413	1	0.404762	0.702381	1	0
N-[4-(4-acetamido-3-chlorophenyl)sulfonyl-2-chlorophenyl]acetamide	6312001	CC(=O)Nc1ccc(cc1Cl)S(=O)(=O)c1ccc(c(c1)Cl)NC(=O)C			ChEMBLE_NTD	1	0.39881	0.699405	1	0
CMP-N-acetylneuraminate	1467867255	OCC(C(C1OC(CC(C1NC(=O)C)O)(OP(=O)(OCC1OC(C(C1O)O)n1ccc(nc1=O)N)O)C(=O)O)O)O	DB02485,EXPT02309	C00128	CHEMBL1214873,CHEMBL1234647	1	0.397619	0.69881	1	0
N-Acetylneuraminate	1467869128	OCC(C(C1OC(O)(CC(C1NC(=O)C)O)C(=O)O)O)O	DB01894,DB02344,DB03721,EXPT02292,EXPT02908,EXPT02909	C00270,C19909,C19910	CHEMBL109645,CHEMBL112030,CHEMBL1234621,CHEMBL152452,CHEMBL165084,CHEMBL307262,CHEMBL3138670,CHEMBL3187768	1	0.397619	0.69881	1	0
N-(4,5-dihydroxy-6-methoxy-2-methyl-3-oxanyl)acetamide	6290687	COC1OC(C)C(C(C1O)O)NC(=O)C			ChEMBLE_NTD	1	0.392857	0.696429	1	0
N-(9-hydroxy-4-methyl-2-oxo-8,9-dihydrofuro[2,3-h]chromen-6-yl)acetamide	6320939	CC(=O)Nc1cc2c(C)cc(=O)oc2c2c1OCC2O			ChEMBLE_NTD	1	0.391667	0.695833	1	0
N-(9-anilino-4-methyl-2-oxo-furo[2,3-h]chromen-6-yl)acetamide	6326473	CC(=O)Nc1cc2c(C)cc(=O)oc2c2c1occ2Nc1ccccc1			ChEMBLE_NTD	1	0.391667	0.695833	1	0
2,3-dihydroxy-10,13-dimethyl-17-(6-methylheptan-2-yl)-1,2,3,7,8,9,11,12,14,15,16,17-dodecahydrocyclopenta[a]phenanthren-6-one	6327807	COc1c(OC)cc2c(c1OC)C13CCC(O1)(OC)C(=O)C=C3C(CC2)NC(=O)C			ChEMBLE_NTD	1	0.389835	0.694918	1	0
N-[1-(methylthio)-9H-fluoren-2-yl]acetamide	2879949	CSc1c(ccc2c1Cc1c2cccc1)NC(=O)C			ChEMBLE_NTD	1	0.384524	0.692262	1	0
3-Hydroxy-2-acetamidofluorene	1467993509	CC(=O)Nc1cc2Cc3c(c2cc1O)cccc3		C14656	CHEMBL296830	1	0.384524	0.692262	1	0
N-[4-(3,4-dichlorophenyl)tetralin-1-yl]acetamide	6191892	CC(=O)NC1CCC(c2c1cccc2)c1ccc(c(c1)Cl)Cl			ChEMBLE_NTD	1	0.380102	0.690051	1	0
(3,4-diacetamidophenyl)arsonic acid	3316262	CC(=O)Nc1cc(ccc1NC(=O)C)[As](=O)(O)O			ChEMBLE_NTD	1	0.37381	0.686905	1	0
N-(7-amino-6,8-dibromo-1,3-dichloro-9H-fluoren-2-yl)acetamide	3709845	CC(=O)Nc1c(Cl)cc2c(c1Cl)Cc1c2cc(c(c1Br)N)Br			ChEMBLE_NTD	1	0.367857	0.683929	1	0
2-[(2-acetamido-1,1,1,3,3,3-hexafluoropropan-2-yl)amino]-4,5,6,7-tetrahydro-1-benzothiophene-3-carboxamide	6323614	CC(=O)Nc1ccc2c3c1c(=O)c1ccccc1c3cc(=O)n2C			ChEMBLE_NTD	1	0.361905	0.680952	1	0
(7-acetamido-1,2-dimethoxy-10-methylsulfanyl-9-oxo-6,7-dihydro-5H-benzo[a]heptalen-3-yl) acetate	6325272	COc1c(OC)c(OC(=O)C)cc2c1c1ccc(c(=O)cc1C(CC2)NC(=O)C)SC			ChEMBLE_NTD,CHEMBL347182	1	0.359524	0.679762	1	0
Colchicine	1467928119	COc1c(OC)cc2c(c1OC)c1ccc(c(=O)cc1C(CC2)NC(=O)C)OC		C07592,D00570	ChEMBLE_NTD,CHEMBL107,CHEMBL330320,CHEMBL87	1	0.359524	0.679762	1	0
Colchicoside	1468023897	OCC1OC(Oc2cc3CCC(c4c(c3c(c2OC)OC)ccc(c(=O)c4)OC)NC(=O)C)C(C(C1O)O)O		C17963	CHEMBL1159477,CHEMBL1994730,CHEMBL89122	1	0.359524	0.679762	1	0
N-(4-acetamidobutyl)acetamide	6255010	CC(=O)NCCCCNC(=O)C			ChEMBLE_NTD	1	0.357143	0.678571	1	0
N-(3-methyl-2,5-dioxo-4-imidazolidinyl)acetamide	6256669	CC(=O)NC1C(=O)NC(=O)N1C			ChEMBLE_NTD	1	0.357143	0.678571	1	0
2-acetamido-2-cyanoacetamide	6288379	N#CC(C(=O)N)NC(=O)C			ChEMBLE_NTD	1	0.357143	0.678571	1	0
N-[4-(1-octylbenzimidazol-2-yl)-1,2,5-oxadiazol-3-yl]acetamide	6312329	CCCCCCCCn1c(nc2c1cccc2)c1nonc1NC(=O)C			ChEMBLE_NTD	1	0.357143	0.678571	1	0
2-acetamido-N-ethylpropanamide	6331891	CCNC(=O)C(NC(=O)C)C			ChEMBLE_NTD	1	0.357143	0.678571	1	0
butyl 2-(2-acetamidopropanoylamino)-3-(4-hydroxyphenyl)propanoate	6333028	CCCCOC(=O)C(Cc1ccc(cc1)O)NC(=O)C(NC(=O)C)C			ChEMBLE_NTD	1	0.357143	0.678571	1	0
2-acetamido-N-[1-[[1-(ethylamino)-1-oxopropan-2-yl]amino]-1-oxopropan-2-yl]propanamide	6334163	CCNC(=O)C(NC(=O)C(NC(=O)C(NC(=O)C)C)C)C			ChEMBLE_NTD	1	0.357143	0.678571	1	0
2-acetamido-N-[1-[[1-[[1-(ethylamino)-1-oxopropan-2-yl]amino]-1-oxopropan-2-yl]amino]-1-oxopropan-2-yl]propanamide	6334185	CCNC(=O)C(NC(=O)C(NC(=O)C(NC(=O)C(NC(=O)C)C)C)C)C			ChEMBLE_NTD	1	0.357143	0.678571	1	0
Leupeptin	1467881807	O=CC(NC(=O)C(NC(=O)C(NC(=O)C)CC(C)C)CC(C)C)CCCNC(=N)N		C01591	ChEMBLE MALARIA,CHEMBL191881,CHEMBL429947,CHEMBL433692	1	0.357143	0.678571	1	0
N-Acetyl-L-leucine	1467890765	CC(CC(C(=O)O)NC(=O)C)C		C02710,D07350	ChEMBLE_NTD,CHEMBL174357,CHEMBL1875805,CHEMBL56021	1	0.357143	0.678571	1	0
Acetylleucyl-leucyl-norleucinal	1467969032	CCCCC(NC(=O)C(NC(=O)C(NC(=O)C)CC(C)C)CC(C)C)C=O		C11306	CHEMBL151937,CHEMBL304784	1	0.357143	0.678571	1	0
N-Acetyl-leucyl-leucine	1467969317	CC(CC(C(=O)NC(C(=O)O)CC(C)C)NC(=O)C)C		C11333	CHEMBL368756	1	0.357143	0.678571	1	0
N-[(S)-(5-chloro-8-hydroxy-7-quinolyl)-[4-(dimethylamino)phenyl]methyl]acetamide	12041481	CC(=O)NC(c1cc(Cl)c2c(c1O)nccc2)c1ccc(cc1)N(C)C			ChEMBLE_NTD,CHEMBL580130	1	0.34881	0.674405	1	0
2-[2-[(2,5-dimethoxyphenyl)methylidene]hydrazinyl]-5-propan-2-yl-4-thiazolone	6324292	COc1c(OC)cc2c(c1OC)C13CCC(O1)(OC)C(=O)CC3C(CC2)NC(=O)C			ChEMBLE_NTD	1	0.347681	0.67384	1	0
1-[2-acetyl-4-(4-chlorophenyl)-3-(4-methoxyphenyl)-1-methyl-3H-1,2,4,5-tetrazin-6-yl]ethanone	6310800	CC(=O)NC12CC3CCC(C1)CC(C2)C3			ChEMBLE_NTD	1	0.344388	0.672194	1	0
N-(4-ethoxyphenyl)-N-[3-(3-methylphenyl)-2,4-dioxo-5-thiazolidinyl]acetamide	6312657	CC(=O)NC12CCC3CC(C1)CC(C2)C3			ChEMBLE_NTD	1	0.342063	0.671032	1	0
N-[[3-(acetamidomethyl)cyclohexyl]methyl]acetamide	6256724	CC(=O)NCC1CCCC(C1)CNC(=O)C			ChEMBLE_NTD	1	0.309524	0.654762	1	0
N-(3-acetamido-4,5-dimethylphenyl)acetamide	6310652	CC(=O)Nc1cc(NC(=O)C)c(c(c1)C)C			ChEMBLE_NTD	1	0.296429	0.648214	1	0
(2R)-2-acetamido-3-(acetylthio)propanoic acid	649056	CC(=O)SCC(C(=O)O)NC(=O)C		D07773	CHEMBL2106099	1	0.285714	0.642857	1	0
(2R)-2-acetamido-3-[(2-hydroxycyclohexyl)thio]propanoic acid methyl ester	2444848	COC(=O)C(NC(=O)C)CSC1CCCCC1O			ChEMBLE_NTD	1	0.285714	0.642857	1	0
N-(4-amino-1,2,5-oxadiazol-3-yl)acetamide	6283322	CC(=O)Nc1nonc1N			ChEMBLE_NTD	1	0.285714	0.642857	1	0
N-(2-methyl-3-oxo-4-isoxazolidinyl)acetamide	6290740	CC(=O)NC1CON(C1=O)C			ChEMBLE_NTD	1	0.285714	0.642857	1	0
2-acetamido-3-formyloxypropanoic acid methyl ester	6306869	O=COCC(C(=O)OC)NC(=O)C			ChEMBLE_NTD	1	0.285714	0.642857	1	0
2-acetamido-3-(1-cyanopropan-2-ylthio)propanoic acid methyl ester	6306891	N#CCC(SCC(C(=O)OC)NC(=O)C)C			ChEMBLE_NTD	1	0.285714	0.642857	1	0
N-(4-oxo-3,5-dihydro-2H-1,5-benzothiazepin-3-yl)acetamide	6308705	CC(=O)NC1CSc2c(NC1=O)cccc2			ChEMBLE_NTD	1	0.285714	0.642857	1	0
2-acetamido-3-(propyldisulfanyl)propanoic acid	6309883	CCCSSCC(C(=O)O)NC(=O)C			ChEMBLE_NTD	1	0.285714	0.642857	1	0
N-(4-oxothiazol-2-yl)acetamide	6312034	CC(=O)NC1=NC(=O)CS1			ChEMBLE_NTD,CHEMBL1603750	1	0.285714	0.642857	1	0
2-acetamido-3-(2-hydroxyethylthio)propanoic acid methyl ester	6312219	OCCSCC(C(=O)OC)NC(=O)C			ChEMBLE_NTD	1	0.285714	0.642857	1	0
N-[4-(4-phenyltriazol-1-yl)-1,2,5-oxadiazol-3-yl]acetamide	6315567	CC(=O)Nc1nonc1n1nnc(c1)c1ccccc1			ChEMBLE_NTD	1	0.285714	0.642857	1	0
N-(4-acetyl-1-thia-3,4-diazaspiro[4.5]dec-2-en-2-yl)acetamide	6315622	CC(=O)N1N=C(SC21CCCCC2)NC(=O)C			ChEMBLE_NTD,CHEMBL1421186	1	0.285714	0.642857	1	0
(E)-7-methyl-4-decene	53406712	COC12CCC3(C(C1)CCC1C3(O2)C(SC(=S)NC(=O)C)CC2(C1CCC2=O)C)C			ChEMBLE_NTD	1	0.285714	0.642857	1	0
O-methyl N-acetylcarbamothioate	53412216	COC(=S)NC(=O)C			ChEMBLE_NTD	1	0.285714	0.642857	1	0
(2R)-3-[[(2S)-2-acetamido-3-[[(1R)-2-[[(1R)-1-[[(1R)-1-[[(1R)-1-[[(1R)-2-[[(1R)-1-carbamoyl-4-guanidino-butyl]amino]-1-methyl-2-oxo-ethyl]carbamoyl]-4-guanidino-butyl]carbamoyl]-4-guanidino-butyl]carbamoyl]-4-guanidino-butyl]amino]-1-methyl-2-oxo-ethyl]amino]-3-oxo-propyl]disulfanyl]-2-amino-propanoic acid	533944673	NC(=NCCCC(C(=O)NC(C(=O)NC(C(=O)NC(C(=O)N)CCCN=C(N)N)C)CCCN=C(N)N)NC(=O)C(NC(=O)C(NC(=O)C(NC(=O)C)CSSCC(C(=O)O)N)C)CCCN=C(N)N)N		D10676	CHEMBL3545184	1	0.285714	0.642857	1	0
Mycothiol	1467920603	SCC(C(=O)NC1C(OC(C(C1O)O)CO)OC1C(O)C(O)C(C(C1O)O)O)NC(=O)C		C06717	CHEMBL311443	1	0.285714	0.642857	1	0
N-Acetylleukotriene E4	1467969624	CCCCCC=CCC=CC=CC=CC(C(CCCC(=O)O)O)SCC(C(=O)O)NC(=O)C		C11361	CHEMBL1886123,CHEMBL2074714	1	0.285714	0.642857	1	0
Grixazone B	1468047980	CC(=O)NC(C(=O)O)CSc1c2nc3cc(ccc3oc2cc(=O)c1N)C(=O)O		C20799	CHEMBL1224597	1	0.285714	0.642857	1	0
Chitobiose	1467882468	OCC1OC(O)C(C(C1OC1OC(CO)C(C(C1NC(=O)C)O)O)O)NC(=O)C		C01674	CHEMBL1169569,CHEMBL1222104,CHEMBL1222122,CHEMBL3351097,CHEMBL467754	1	0.267857	0.633929	1	0
Allosamidine	1467908789	OCC1OC(OC2C(CO)C3C(C2O)N=C(O3)N(C)C)C(C(C1OC1OC(CO)C(C(C1NC(=O)C)O)O)O)NC(=O)C		C05346	CHEMBL1230997,CHEMBL318258	1	0.267857	0.633929	1	0
tat-BP	1469296529	OCC1OC(OC2C3COC(O3)C(C2OC(C(=O)NC(C(=O)NC(C(=O)[O-])CCC(=O)NC(C(=O)NC(C(=O)[O-])C)CCCC(C(=O)[O-])[N+])C)C)NC(=O)C)C(C(C1O)O)NC(=O)C	DB04736		CHEMBL1652129	1	0.267857	0.633929	1	0
N-(2,6-diamino-4-oxo-1H-pyrimidin-5-yl)acetamide	6311915	CC(=O)Nc1c(N)[nH]c(nc1=O)N			ChEMBLE_NTD	1	0.261905	0.630952	1	0
N-(6-hydroxy-4-oxo-2-thioxo-1H-pyrimidin-5-yl)acetamide	13108537	CC(=O)Nc1c(O)[nH]c(=S)[nH]c1=O			ChEMBLE_NTD	1	0.261905	0.630952	1	0
5-Acetylamino-6-amino-3-methyluracil	1468009766	CC(=O)Nc1c(N)[nH]c(=O)n(c1=O)C		C16366	CHEMBL1899490	1	0.261905	0.630952	1	0
SQ 26180	1468014312	COC1(NC(=O)C)CN(C1=O)S(=O)(=O)O		C16842	CHEMBL1205337	1	0.261905	0.630952	1	0
N-[4-(5-acetamido-1,3,4-thiadiazol-2-yl)-1,2,5-oxadiazol-3-yl]acetamide	6309350	CC(=O)Nc1nnc(s1)c1nonc1NC(=O)C			ChEMBLE_NTD	1	0.25	0.625	1	0
N-[2-(2-acetamidophenyl)phenyl]acetamide	4704346	CC(=O)Nc1ccccc1c1ccccc1NC(=O)C			ChEMBLE_NTD	1	0.234524	0.617262	1	0
iodamide	1468133605	CC(=O)NCc1c(I)c(NC(=O)C)c(c(c1I)C(=O)O)I	DB08948	D01376	ChEMBLE_NTD,CHEMBL1201239	1	0.233673	0.616837	1	0
ethyl 2-acetamido-3,3,3-trifluoro-2-(2-methylanilino)propanoate	6278399	CCOC(=O)C(C(F)(F)F)(Nc1ccccc1C)NC(=O)C			ChEMBLE_NTD	1	0.22619	0.613095	1	0
ethyl 2-acetamido-3,3,3-trifluoro-2-[4-[(5-methylisoxazol-3-yl)sulfamoyl]anilino]propanoate	6283789	CCOC(=O)C(C(F)(F)F)(Nc1ccc(cc1)S(=O)(=O)Nc1noc(c1)C)NC(=O)C			ChEMBLE_NTD,CHEMBL589692	1	0.22619	0.613095	1	0
ethyl 2-acetamido-3,3,3-trifluoro-2-morpholino-propanoate	6316876	CCOC(=O)C(C(F)(F)F)(N1CCOCC1)NC(=O)C			ChEMBLE_NTD,CHEMBL1547019	1	0.22619	0.613095	1	0
ethyl 2-acetamido-2-(2,4-dimethylanilino)-3,3,3-trifluoro-propanoate	6319930	CCOC(=O)C(C(F)(F)F)(Nc1ccc(cc1C)C)NC(=O)C			ChEMBLE_NTD	1	0.22619	0.613095	1	0
ethyl 2-acetamido-3,3,3-trifluoro-2-[4-(trifluoromethyl)anilino]propanoate	6322441	CCOC(=O)C(C(F)(F)F)(Nc1ccc(cc1)C(F)(F)F)NC(=O)C			ChEMBLE_NTD	1	0.22619	0.613095	1	0
2-acetamido-2-[(3,5-dichloro-2-pyridinyl)amino]-3,3,3-trifluoropropanoic acid methyl ester	6322505	COC(=O)C(C(F)(F)F)(Nc1ncc(cc1Cl)Cl)NC(=O)C			ChEMBLE_NTD	1	0.22619	0.613095	1	0
ethyl 2-acetamido-3,3,3-trifluoro-2-[4-(trifluoromethoxy)anilino]propanoate	6323451	CCOC(=O)C(C(F)(F)F)(Nc1ccc(cc1)OC(F)(F)F)NC(=O)C			ChEMBLE_NTD	1	0.22619	0.613095	1	0
2-acetamido-3,3,3-trifluoro-2-[(6-methyl-1,3-benzothiazol-2-yl)amino]propanoic acid methyl ester	6324828	COC(=O)C(C(F)(F)F)(Nc1nc2c(s1)cc(cc2)C)NC(=O)C			ChEMBLE_NTD,CHEMBL1392087	1	0.22619	0.613095	1	0
3,5-diacetamido-2,4,6-triiodo-N-methyl-N-[2-[methyl(2,3,4,5,6-pentahydroxyhexyl)amino]-2-oxoethyl]benzamide	650685	OCC(C(C(C(CN(C(=O)CN(C(=O)c1c(I)c(NC(=O)C)c(c(c1I)NC(=O)C)I)C)C)O)O)O)O		D08082	CHEMBL2104929	1	0.216667	0.608333	1	0
amidotrizoic acid	1468189092	CC(=O)Nc1c(I)c(NC(=O)C)c(c(c1I)C(=O)O)I	APRD00913,DB00271	D02240	ChEMBLE_NTD,CHEMBL1201220	1	0.216667	0.608333	1	0
N-(4-amino-6-propyl-1,3,5-triazin-2-yl)acetamide	2982880	CCCc1nc(NC(=O)C)nc(n1)N			ChEMBLE_NTD	1	0.214286	0.607143	1	0
N-(4-amino-1,3,5-triazin-2-yl)acetamide	4595543	CC(=O)Nc1ncnc(n1)N			ChEMBLE_NTD	1	0.214286	0.607143	1	0
N-[1,1,1,3,3,3-hexafluoro-2-(2-thiazolylamino)propan-2-yl]acetamide	6302691	CC(=O)NC(C(F)(F)F)(C(F)(F)F)Nc1nccs1			ChEMBLE_NTD	1	0.214286	0.607143	1	0
N-[6-(2-naphthylsulfonyl)-4-oxo-1H-quinazolin-2-yl]acetamide	6309392	CC(=O)Nc1nc(=O)c2c([nH]1)ccc(c2)S(=O)(=O)c1ccc2c(c1)cccc2			ChEMBLE_NTD,CHEMBL7136	1	0.214286	0.607143	1	0
N-(7-amino-6-methyl-[1,2,4]triazolo[4,3-b][1,2,4]triazol-3-yl)acetamide	6313329	CC(=O)Nc1nnc2n1nc(n2N)C			ChEMBLE_NTD	1	0.214286	0.607143	1	0
N-[2-[(3-cyano-5,6-dihydro-4H-cyclopenta[b]thiophen-2-yl)amino]-1,1,1,3,3,3-hexafluoropropan-2-yl]acetamide	6314802	N#Cc1c(sc2c1CCC2)NC(C(F)(F)F)(C(F)(F)F)NC(=O)C			ChEMBLE_NTD	1	0.214286	0.607143	1	0
N-[5-(1H-benzimidazol-2-yl)-4-methyl-2-thiazolyl]acetamide	6320774	CC(=O)Nc1sc(c(n1)C)c1nc2c([nH]1)cccc2			ChEMBLE_NTD	1	0.214286	0.607143	1	0
N-[4-(4-fluorophenyl)thiazol-2-yl]acetamide	7815731	CC(=O)Nc1scc(n1)c1ccc(cc1)F			ChEMBLE_NTD,CHEMBL600130	1	0.214286	0.607143	1	0
N-(4-oxo-5,6,7,8-tetrahydrothiazolo[5,4-c]azepin-2-yl)acetamide	8271828	CC(=O)Nc1nc2c(s1)C(=O)NCCC2	DB08776		CHEMBL562743	1	0.214286	0.607143	1	0
N-[5-[(4-tert-butyl-2,6-dimethylphenyl)methylthio]-1,3,4-thiadiazol-2-yl]acetamide	10351880	CC(=O)Nc1nnc(s1)SCc1c(C)cc(cc1C)C(C)(C)C			ChEMBLE_NTD,CHEMBL547614	1	0.214286	0.607143	1	0
N-[5-[2-(4-chloroanilino)-4-thiazolyl]-4-methyl-2-thiazolyl]acetamide	11996050	CC(=O)Nc1nc(c(s1)c1csc(n1)Nc1ccc(cc1)Cl)C			ChEMBLE_NTD,CHEMBL548080	1	0.214286	0.607143	1	0
N-[5-[2-(4-bromoanilino)-4-thiazolyl]-4-methyl-2-thiazolyl]acetamide	12619137	CC(=O)Nc1nc(c(s1)c1csc(n1)Nc1ccc(cc1)Br)C			ChEMBLE_NTD,CHEMBL600947	1	0.214286	0.607143	1	0
N-[4-methyl-5-[2-(4-methylanilino)thiazol-4-yl]thiazol-2-yl]acetamide	27905441	CC(=O)Nc1nc(c(s1)c1csc(n1)Nc1ccc(cc1)C)C			ChEMBLE_NTD,CHEMBL604514	1	0.214286	0.607143	1	0
beta-D-GlcpNAc-(1->4)-beta-D-GlcpNAc-(1->4)-beta-D-GlcpNAc	1468270502	OCC1OC(OC2C(CO)OC(C(C2O)NC(=O)C)O)C(C(C1OC1OC(CO)C(C(C1NC(=O)C)O)O)O)NC(=O)C	DB04194,EXPT01052		CHEMBL1222017,CHEMBL1222105	1	0.178571	0.589286	1	0
N-(benzylideneamino)acetamide	3534197	CC(=O)NN=Cc1ccccc1			ChEMBLE_NTD,CHEMBL3103213	1	0.142857	0.571429	1	0
N-[4-[(3,5-dioxo-1,2-diphenyl-pyrazolidin-4-yl)methyleneamino]phenyl]sulfonylacetamide	4295703	CC(=O)NS(=O)(=O)c1ccc(cc1)N=CC1C(=O)N(N(C1=O)c1ccccc1)c1ccccc1			ChEMBLE_NTD	1	0.142857	0.571429	1	0
N-[4-[(6-chloro-9-oxo-4-xanthenyl)methylamino]phenyl]sulfonylacetamide	4958486	CC(=O)NS(=O)(=O)c1ccc(cc1)NCc1cccc2c1oc1cc(Cl)ccc1c2=O			ChEMBLE_NTD,CHEMBL1991485	1	0.142857	0.571429	1	0
N-phenoxyacetamide	6291407	CC(=O)NOc1ccccc1			ChEMBLE_NTD	1	0.142857	0.571429	1	0
N-[(2-fluorophenyl)methyleneamino]acetamide	6307681	CC(=O)NN=Cc1ccccc1F			ChEMBLE_NTD	1	0.142857	0.571429	1	0
N'-(3-chloro-4-methylphenyl)acetohydrazide	6313856	CC(=O)NNc1ccc(c(c1)Cl)C			ChEMBLE_NTD	1	0.142857	0.571429	1	0
N'-(2-methylphenyl)acetohydrazide	6314733	CC(=O)NNc1ccccc1C			ChEMBLE_NTD	1	0.142857	0.571429	1	0
N'-(4-methylphenyl)acetohydrazide	6314742	CC(=O)NNc1ccc(cc1)C			ChEMBLE_NTD	1	0.142857	0.571429	1	0
propyl 2-acetamido-3-[(2-acetamido-3-oxo-3-propoxy-propyl)disulfanyl]propanoate	6315781	CCCOC(=O)C(NC(=O)C)CSSCC(C(=O)OCCC)NC(=O)C			ChEMBLE_NTD	1	0.142857	0.571429	1	0
N-[(7,7-dimethyl-3-oxo-6,8-dihydro-2H-cinnolin-5-ylidene)amino]acetamide	6316391	CC(=O)NN=C1CC(C)(C)Cc2c1cc(=O)[nH]n2			ChEMBLE_NTD	1	0.142857	0.571429	1	0
N-[5-(3-ethyl-4,5-dimethyl-thiazol-2-ylidene)-4-oxo-2-thioxo-thiazolidin-3-yl]acetamide	6317061	CCn1c(=C2SC(=S)N(C2=O)NC(=O)C)sc(c1C)C			ChEMBLE_NTD,CHEMBL1430854	1	0.142857	0.571429	1	0
pentyl 2-acetamido-3-[(2-acetamido-3-oxo-3-pentoxy-propyl)disulfanyl]propanoate	6318423	CCCCCOC(=O)C(NC(=O)C)CSSCC(C(=O)OCCCCC)NC(=O)C			ChEMBLE_NTD	1	0.142857	0.571429	1	0
N-[(Z)-2-(dimethylamino)-3-oxobut-1-enyl]acetamide	53405939	CC(=O)NC=C(C(=O)C)N(C)C			ChEMBLE_NTD	1	0.142857	0.571429	1	0
O-methyl N-acetamidocarbamothioate	53412714	COC(=S)NNC(=O)C			ChEMBLE_NTD	1	0.142857	0.571429	1	0
Acetylhydrazine	1467926665	CC(=O)NN		C07447	CHEMBL3091859	1	0.142857	0.571429	1	0
Acephate	1467990990	COP(=O)(NC(=O)C)SC		C14426	CHEMBL2133249	1	0.142857	0.571429	1	0
Epithienamycin B	1468018599	CC(=O)NC=CSC1=C(C(=O)O)N2C(C1)C(C2=O)C(O)C		C17396,C17398	CHEMBL1205391	1	0.142857	0.571429	1	0
MM 4550	1468048096	CC(=O)NC=CS(=O)C1=C(C(=O)O)N2C(C1)C(C2=O)C(OS(=O)(=O)O)C		C20815	CHEMBL1205386,CHEMBL1207623	1	0.142857	0.571429	1	0
sulfacetamide	1468231309	CC(=O)NS(=O)(=O)c1ccc(cc1)N	APRD00452,DB00634	D05947	ChEMBLE_NTD,CHEMBL455	1	0.142857	0.571429	1	0
N-(5-acetamido-1,3,4-thiadiazol-2-yl)acetamide	3814743	CC(=O)Nc1nnc(s1)NC(=O)C			ChEMBLE_NTD	1	0.107143	0.553571	1	0
N,N'-Diacetylhydrazine	1468012171	CC(=O)NNC(=O)C		C16622	CHEMBL3091852	1	0.0714286	0.535714	1	0
12-methoxydodecanoic acid	15110	COCCCCCCCCCCCC(=O)O			ChEMBLE_NTD,CHEMBL1606365	1	1	1	0	1
16-iodohexadecanoic acid	411784	ICCCCCCCCCCCCCCCC(=O)O		D04566	CHEMBL2105049,CHEMBL2110684	1	1	1	0	1
7-(2-hexyl-5-hydroxycyclopentyl)heptanoic acid	680663	CCCCCCC1CCC(C1CCCCCCC(=O)O)O		D02719	CHEMBL2105331	1	1	1	0	1
2-octylundecanedioic acid	2207114	CCCCCCCCC(C(=O)O)CCCCCCCCC(=O)O			ChEMBLE_NTD	1	1	1	0	1
7-[2-(3-hydroxy-3-methyloctyl)-5-oxocyclopentyl]heptanoic acid	2786439	CCCCCC(CCC1CCC(=O)C1CCCCCCC(=O)O)(O)C		D03688	CHEMBL2106576	1	1	1	0	1
11-(carboxymethylthio)undecanoic acid	3364284	OC(=O)CCCCCCCCCCSCC(=O)O			ChEMBLE_NTD	1	1	1	0	1
7-[(1S,2R)-3-hydroxy-2-octylcyclopentyl]heptanoic acid	5412478	CCCCCCCCC1C(O)CCC1CCCCCCC(=O)O			ChEMBLE_NTD	1	1	1	0	1
8-(octylthio)octanoic acid	6263457	CCCCCCCCSCCCCCCCC(=O)O			ChEMBLE_NTD	1	1	1	0	1
15-heptadecenoic acid	6285683	CC=CCCCCCCCCCCCCCC(=O)O			ChEMBLE_NTD	1	1	1	0	1
pentacosa-10,12-diynoic acid	6300058	CCCCCCCCCCCCC#CC#CCCCCCCCCC(=O)O			ChEMBLE_NTD	1	1	1	0	1
tricosa-10,12-diynoic acid	6300267	CCCCCCCCCCC#CC#CCCCCCCCCC(=O)O			ChEMBLE_NTD	1	1	1	0	1
7-[(1R)-2-[(E)-3-hydroxy-3-methyloct-1-enyl]-5-oxocyclopentyl]heptanoic acid	60756240	CCCCCC(C=CC1CCC(=O)C1CCCCCCC(=O)O)(O)C		D03897	CHEMBL2106293,CHEMBL3246386	1	1	1	0	1
7-[(2R,5R)-2-[(3S)-1,1-difluoro-3-methylpentyl]-2-hydroxy-6-oxo-3,4,4a,5,7,7a-hexahydrocyclopenta[b]pyran-5-yl]heptanoic acid	96028425	CCC(CC(C1(O)CCC2C(O1)CC(=O)C2CCCCCCC(=O)O)(F)F)C	DB05514	D08893	CHEMBL2103799	1	1	1	0	1
(12E,15E,18E,21E)-tetracosa-12,15,18,21-tetraenoic acid	125984490	CCC=CCC=CCC=CCC=CCCCCCCCCCCC(=O)O				1	1	1	0	1
docosa-10,13,16,19-tetraenoic acid	532269535	CCC=CCC=CCC=CCC=CCCCCCCCCC(=O)O				1	1	1	0	1
Hexadecanoic acid	1467868847	CCCCCCCCCCCCCCCC(=O)O		C00249,D05341	CHEMBL82293	1	1	1	0	1
(9Z)-Octadecenoic acid	1467873776	CCCCCCCCC=CCCCCCCCC(=O)O	DB04224,EXPT02430	C00712,C01712,D02315	CHEMBL460657,CHEMBL8659	1	1	1	0	1
Prostaglandin B1	1467876366	CCCCCC(C=CC1=C(CCCCCCC(=O)O)C(=O)CC1)O		C00959	CHEMBL1561148	1	1	1	0	1
12-OPDA	1467878918	CCC=CCC1C(CCCCCCCC(=O)O)C=CC1=O	DB03007,EXPT02441	C01226,C13816	CHEMBL3120607,CHEMBL465602	1	1	1	0	1
Octadecanoic acid	1467881276	CCCCCCCCCCCCCCCCCC(=O)O	DB03193,EXPT02965	C01530,D00119	CHEMBL46403	1	1	1	0	1
Decanoic acid	1467881636	CCCCCCCCCC(=O)O		C01571	CHEMBL107498	1	1	1	0	1
Linoleate	1467881851	CCCCCC=CCC=CCCCCCCCC(=O)O		C01595	ChEMBLE_NTD,CHEMBL267476	1	1	1	0	1
Nonanoic acid	1467881906	CCCCCCCCC(=O)O		C01601	CHEMBL108436	1	1	1	0	1
Prostanoic acid	1467885896	CCCCCCCCC1CCCC1CCCCCCC(=O)O		C02064		1	1	1	0	1
10-Oxodecanoate	1467887147	O=CCCCCCCCCC(=O)O		C02217		1	1	1	0	1
Dodecanoic acid	1467890574	CCCCCCCCCCCC(=O)O	DB03017,EXPT01112,EXPT02006	C02679,D10714	CHEMBL108766	1	1	1	0	1
10-Hydroxydecanoic acid	1467891251	OCCCCCCCCCC(=O)O		C02774		1	1	1	0	1
13-Hydroxydocosanoic acid	1467893318	CCCCCCCCCC(CCCCCCCCCCCC(=O)O)O		C03049		1	1	1	0	1
(R)-10-Hydroxystearate	1467894400	CCCCCCCCC(CCCCCCCCC(=O)O)O		C03195		1	1	1	0	1
Dihomo-gamma-linolenate	1467894840	CCCCCC=CCC=CCC=CCCCCCCC(=O)O		C03242	CHEMBL465183	1	1	1	0	1
Rumenic acid	1467900304	CCCCCCC=CC=CCCCCCCCC(=O)O		C04056		1	1	1	0	1
13-beta-D-Glucosyloxydocosanoate	1467900653	CCCCCCCCCC(OC1OC(CO)C(C(C1O)O)O)CCCCCCCCCCCC(=O)O		C04103	ChEMBLE_NTD	1	1	1	0	1
(9Z)-(13S)-12,13-Epoxyoctadeca-9,11-dienoic acid	1467904144	CCCCCC1OC1=CC=CCCCCCCCC(=O)O		C04594		1	1	1	0	1
(13E)-11alpha-Hydroxy-9,15-dioxoprost-13-enoate	1467904585	CCCCCC(=O)C=CC1C(O)CC(=O)C1CCCCCCC(=O)O		C04654		1	1	1	0	1
(9Z,15Z)-(13S)-12,13-Epoxyoctadeca-9,11,15-trienoic acid	1467904708	CCC=CCC1OC1=CC=CCCCCCCCC(=O)O		C04672		1	1	1	0	1
(13E)-(15S)-15-Hydroxy-9-oxoprosta-10,13-dienoate	1467904838	CCCCCC(C=CC1C=CC(=O)C1CCCCCCC(=O)O)O		C04685	CHEMBL1084644	1	1	1	0	1
(13E)-(15S)-15-Hydroxy-9-oxoprosta-11,13-dienoate	1467904854	CCCCCC(C=CC1=CCC(=O)C1CCCCCCC(=O)O)O		C04686		1	1	1	0	1
(9Z,11E)-(13S)-13-Hydroperoxyoctadeca-9,11-dienoic acid	1467905067	CCCCCC(C=CC=CCCCCCCCC(=O)O)OO		C04717	CHEMBL1229641	1	1	1	0	1
Alprostadil	1467905301	CCCCCC(C=CC1C(O)CC(=O)C1CCCCCCC(=O)O)O		C04741,D00180	ChEMBLE_NTD,CHEMBL1318789,CHEMBL3276444,CHEMBL3348824,CHEMBL495	1	1	1	0	1
8-[(1R,2R)-3-Oxo-2-{(Z)-pent-2-enyl}cyclopentyl]octanoate	1467905541	CCC=CCC1C(CCCCCCCC(=O)O)CCC1=O		C04780		1	1	1	0	1
13(S)-HPOT	1467905565	CCC=CCC(C=CC=CCCCCCCCC(=O)O)OO		C04785		1	1	1	0	1
Octanoic acid	1467917646	CCCCCCCC(=O)O	DB04519,EXPT02413	C06423,D05220	CHEMBL324846	1	1	1	0	1
Tetradecanoic acid	1467917663	CCCCCCCCCCCCCC(=O)O	DB08231	C06424	CHEMBL111077	1	1	1	0	1
Icosanoic acid	1467917680	CCCCCCCCCCCCCCCCCCCC(=O)O		C06425	CHEMBL1173381	1	1	1	0	1
(9Z,12Z,15Z)-Octadecatrienoic acid	1467917714	CCC=CCC=CCC=CCCCCCCCC(=O)O		C06427	CHEMBL3560296,CHEMBL8739	1	1	1	0	1
Prostaglandin D1	1467917822	CCCCCC(C=CC1C(=O)CC(C1CCCCCCC(=O)O)O)O		C06438	CHEMBL167149,CHEMBL2075005	1	1	1	0	1
Prostaglandin F1alpha	1467918200	CCCCCC(C=CC1C(O)CC(C1CCCCCCC(=O)O)O)O		C06475	CHEMBL1325783	1	1	1	0	1
Crepenynate	1467925298	CCCCCC#CCC=CCCCCCCCC(=O)O		C07289		1	1	1	0	1
(9Z,12Z)-(11S)-11-Hydroperoxyoctadeca-9,12-dienoic acid	1467925770	CCCCCC=CC(C=CCCCCCCCC(=O)O)OO		C07338		1	1	1	0	1
Docosanoic acid	1467932854	CCCCCCCCCCCCCCCCCCCCCC(=O)O		C08281	CHEMBL1173474	1	1	1	0	1
10,16-Dihydroxyhexadecanoic acid	1467932903	OCCCCCCC(CCCCCCCCC(=O)O)O		C08285		1	1	1	0	1
(9R,10R)-Dihydroxyoctadecanoic acid	1467933224	CCCCCCCCC(C(CCCCCCCC(=O)O)O)O		C08314,C15988,C19622		1	1	1	0	1
(9Z,11E,13E)-Octadecatrienoic acid	1467933237	CCCCC=CC=CC=CCCCCCCCC(=O)O		C08315,C08364		1	1	1	0	1
Erucic acid	1467933253	CCCCCCCCC=CCCCCCCCCCCCC(=O)O		C08316	CHEMBL1173380	1	1	1	0	1
12-Hydroxydodecanoic acid	1467933269	OCCCCCCCCCCCC(=O)O	DB03704,EXPT00021	C08317	CHEMBL55068	1	1	1	0	1
Tetracosanoic acid	1467933316	CCCCCCCCCCCCCCCCCCCCCCCC(=O)O		C08320	CHEMBL1173620	1	1	1	0	1
Malvalic acid	1467933331	CCCCCCCCC1=C(C1)CCCCCCC(=O)O		C08321		1	1	1	0	1
Myristoleic acid	1467933344	CCCCC=CCCCCCCCC(=O)O		C08322	CHEMBL456732	1	1	1	0	1
(15Z)-Tetracosenoic acid	1467933362	CCCCCCCCC=CCCCCCCCCCCCCCC(=O)O		C08323	CHEMBL1173379	1	1	1	0	1
(9Z)-Hexadecenoic acid	1467933773	CCCCCCC=CCCCCCCCC(=O)O	DB04257,EXPT02495	C08362	CHEMBL3182018,CHEMBL453509	1	1	1	0	1
Ricinoleic acid	1467933822	CCCCCCC(CC=CCCCCCCCC(=O)O)O	DB02955,EXPT02762	C08365	CHEMBL1235634,CHEMBL1877670,CHEMBL3186422	1	1	1	0	1
Sterculic acid	1467933839	CCCCCCCCC1=C(C1)CCCCCCCC(=O)O		C08366		1	1	1	0	1
(11E)-Octadecenoic acid	1467933853	CCCCCCC=CCCCCCCCCCC(=O)O	DB04801	C08367	CHEMBL1236642	1	1	1	0	1
Vernolic acid	1467933869	CCCCCC1OC1CC=CCCCCCCCC(=O)O		C08368,C14826	CHEMBL2447889,CHEMBL281291	1	1	1	0	1
Stearolic acid	1467934942	CCCCCCCCC#CCCCCCCCC(=O)O		C08459	CHEMBL482804	1	1	1	0	1
8-(5-Hexyl-furan-2-yl)-octanoic acid	1467985581	CCCCCCc1ccc(o1)CCCCCCCC(=O)O		C13798	CHEMBL1973002	1	1	1	0	1
Lactobacillic acid	1467986025	CCCCCCC1CC1CCCCCCCCCC(=O)O		C13838		1	1	1	0	1
16-Fluorohexadecanoic acid	1467986879	FCCCCCCCCCCCCCCCC(=O)O		C13948		1	1	1	0	1
9,10-12,13-Diepoxyoctadecanoate	1467995547	CCCCCC1OC1CC1OC1CCCCCCCC(=O)O		C14836		1	1	1	0	1
Nonadecanoic acid	1468011348	CCCCCCCCCCCCCCCCCCC(=O)O		C16535	CHEMBL1169674	1	1	1	0	1
Pentadecanoic acid	1468011372	CCCCCCCCCCCCCCC(=O)O		C16537	CHEMBL460025	1	1	1	0	1
12-Methyltetradecanoic acid	1468012588	CCC(CCCCCCCCCCC(=O)O)C		C16665	CHEMBL495852	1	1	1	0	1
Tuberculostearic acid	1468013827	CCCCCCCCC(CCCCCCCCC(=O)O)C		C16794		1	1	1	0	1
Tridecanoic acid	1468016491	CCCCCCCCCCCCC(=O)O	DB02448,EXPT03028	C17076	CHEMBL107874	1	1	1	0	1
Undecanoic acid	1468021689	CCCCCCCCCCC(=O)O		C17715	CHEMBL108030	1	1	1	0	1
16-Feruloyloxypalmitate	1468026301	COc1cc(C=CC(=O)OCCCCCCCCCCCCCCCC(=O)O)ccc1O		C18217		1	1	1	0	1
cis-9,10-Epoxystearic acid	1468037206	CCCCCCCCC1OC1CCCCCCCC(=O)O		C19418	CHEMBL27918	1	1	1	0	1
Isooctadecanoic acid	1468044810	CC(CCCCCCCCCCCCCCC(=O)O)C		C20356	CHEMBL1865303	1	1	1	0	1
tricosanoate	1468090339	CCCCCCCCCCCCCCCCCCCCCCC(=O)O	DB03500,EXPT01377		CHEMBL1173462	1	1	1	0	1
12-bromododecanoic acid	1468093842	BrCCCCCCCCCCCC(=O)O	DB02405,EXPT00749		CHEMBL1231458	1	1	1	0	1
cerotate	1468132043	CCCCCCCCCCCCCCCCCCCCCCCCCC(=O)O			CHEMBL464787	1	1	1	0	1
hpdca	1468135122	CCCCCCCCCCCCCCCCC(=O)O			CHEMBL1172910	1	1	1	0	1
henicosanoate	1468158224	CCCCCCCCCCCCCCCCCCCCC(=O)O			CHEMBL1172909	1	1	1	0	1
(9Z,12Z)-(8R)-Hydroxyoctadeca-9,12-dienoic acid	1467933285	CCCCCC=CCC=CC(CCCCCCC(=O)O)O		C08318		1	0.939394	0.969697	0	1
(7R,8S)-8-amino-7-(phosphonooxycarbonylamino)nonanoic acid	5455536	OC(=O)CCCCCC(C(N)C)NC(=O)OP(=O)(O)O	DB02927,EXPT01262			1	0.923076	0.961538	0	1
Heptanoic acid	1468021677	CCCCCCC(=O)O		C17714	CHEMBL320358	1	0.916666	0.958333	0	1
7-octadecenoic acid	45566699	CCCCCCCCCCC=CCCCCCC(=O)O				1	0.846154	0.923077	0	1
7-[2,6-dichloro-4-[(2-chlorobenzoyl)carbamoylamino]phenoxy]heptanoic acid	53051572	O=C(NC(=O)c1ccccc1Cl)Nc1cc(Cl)c(c(c1)Cl)OCCCCCCC(=O)O	DB04642			1	0.846154	0.923077	0	1
(7E)-7-[(3aR,4R,5R,6aS)-5-hydroxy-4-[(E,3S)-3-hydroxyoct-1-enyl]-3,3a,4,5,6,6a-hexahydrocyclopenta[b]furan-2-ylidene]heptanoic acid	60728421	CCCCCC(C=CC1C(O)CC2C1CC(=CCCCCCC(=O)O)O2)O			ChEMBLE_NTD	1	0.846154	0.923077	0	1
(7S,8S)-DiHODE	1467925908	CCCCCC=CCC=CC(C(CCCCCC(=O)O)O)O		C07354	ChEMBLE_NTD	1	0.828572	0.914286	0	1
(9Z)-(7S,8S)-Dihydroxyoctadecenoic acid	1467925923	CCCCCCCCC=CC(C(CCCCCC(=O)O)O)O		C07355	ChEMBLE_NTD	1	0.828572	0.914286	0	1
(9Z,12Z,15Z)-(7S,8S)-Dihydroxyoctadeca-9,12,15-trienoic acid	1467925946	CCC=CCC=CCC=CC(C(CCCCCC(=O)O)O)O		C07357		1	0.828572	0.914286	0	1
5-(2-amino-3a,4,6,6a-tetrahydro-1H-thieno[3,4-d]imidazol-4-yl)pentanoic acid	16559	NC1=NC2C(N1)CSC2CCCCC(=O)O	DB03353,EXPT01870		CHEMBL1233598	1	0.8	0.9	0	1
4-oxodecanedioic acid	18509	O=C(CCC(=O)O)CCCCCC(=O)O	DB02260,EXPT00224			1	0.8	0.9	0	1
2-iodododecanoic acid	6262095	CCCCCCCCCCC(C(=O)O)I			ChEMBLE_NTD	1	0.785714	0.892857	0	1
2-iodotetradecanoic acid	6280044	CCCCCCCCCCCCC(C(=O)O)I			ChEMBLE_NTD	1	0.785714	0.892857	0	1
4-oxodecanoic acid	6301957	CCCCCCC(=O)CCC(=O)O			ChEMBLE_NTD	1	0.785714	0.892857	0	1
(8E,10S,12Z)-10-hydroxy-6-oxooctadeca-8,12-dienoic acid	299888098	CCCCCC=CCC(C=CCC(=O)CCCCC(=O)O)O	DB07208			1	0.785714	0.892857	0	1
2-Oxooctadecanoic acid	1467875472	CCCCCCCCCCCCCCCCC(=O)C(=O)O		C00869		1	0.785714	0.892857	0	1
Dihydrolipoate	1467886607	SCCC(CCCCC(=O)O)S		C02147	CHEMBL1235647	1	0.785714	0.892857	0	1
3-Oxododecanoic acid	1467888364	CCCCCCCCCC(=O)CC(=O)O		C02367		1	0.785714	0.892857	0	1
(R)-2-Hydroxystearate	1467893244	CCCCCCCCCCCCCCCCC(C(=O)O)O		C03042,C03045		1	0.785714	0.892857	0	1
6-Keto-prostaglandin F1alpha	1467913758	CCCCCC(C=CC1C(O)CC(C1CC(=O)CCCCC(=O)O)O)O		C05961	CHEMBL2074840	1	0.785714	0.892857	0	1
6-Keto-prostaglandin E1	1467913774	CCCCCC(C=CC1C(O)CC(=O)C1CC(=O)CCCCC(=O)O)O		C05962	CHEMBL138482	1	0.785714	0.892857	0	1
(7R,8S)-8-amino-7-(carboxyamino)nonanoic acid	5452397	OC(=O)CCCCCC(C(N)C)NC(=O)O	DB03624,EXPT01273			1	0.783784	0.891892	0	1
7-(2-isopropylidenehydrazino)-7-oxo-heptanoic acid	5826121	O=C(NN=C(C)C)CCCCCC(=O)O			ChEMBLE_NTD	1	0.777778	0.888889	0	1
7-hydrazino-7-oxo-heptanoic acid	5826132	NNC(=O)CCCCCC(=O)O			ChEMBLE_NTD	1	0.777778	0.888889	0	1
6-Carboxyhexanoyl-CoA	1467877338	O=C(NCCSC(=O)CCCCCC(=O)O)CCNC(=O)C(C(COP(=O)(OP(=O)(OCC1OC(C(C1OP(=O)(O)O)O)n1cnc2c1ncnc2N)O)O)(C)C)O		C01063		1	0.777778	0.888889	0	1
alpha-Licanic acid	1467933300	CCCCC=CC=CC=CCCCCC(=O)CCC(=O)O		C08319		1	0.777778	0.888889	0	1
2-Oxodecanoic acid	1467986841	CCCCCCCCC(=O)C(=O)O		C13945		1	0.777778	0.888889	0	1
2-Oxo-8-methylthiooctanoic acid	1468017451	CSCCCCCCC(=O)C(=O)O		C17224		1	0.777778	0.888889	0	1
2-Oxo-9-methylthiononanoic acid	1468017488	CSCCCCCCCC(=O)C(=O)O		C17228		1	0.777778	0.888889	0	1
2-Oxo-10-methylthiodecanoic acid	1468017526	CSCCCCCCCCC(=O)C(=O)O		C17232		1	0.777778	0.888889	0	1
3-Oxodecanoate	1468047363	CCCCCCCC(=O)CC(=O)O		C20714		1	0.777778	0.888889	0	1
2-bromohexadecanoic acid	1468380000	CCCCCCCCCCCCCCC(C(=O)O)Br			ChEMBLE MALARIA,CHEMBL118417	1	0.777778	0.888889	0	1
5-oxo-6-phenylhexanoic acid	6285038	O=C(Cc1ccccc1)CCCC(=O)O			ChEMBLE_NTD	1	0.724138	0.862069	0	1
Phytanate	1467881967	CC(CCCC(CC(=O)O)C)CCCC(CCCC(C)C)C		C01607	CHEMBL1215869	1	0.724138	0.862069	0	1
eicosa-11,14,17-trienoic acid methyl ester	415750	CCC=CCC=CCC=CCCCCCCCCCC(=O)OC			ChEMBLE_NTD	1	0.702128	0.851064	0	1
11-hydroxyundecanoic acid methyl ester	6173040	OCCCCCCCCCCC(=O)OC			ChEMBLE_NTD	1	0.702128	0.851064	0	1
11-[tert-butyl(dimethyl)silyl]oxyeicosanoic acid methyl ester	6188484	CCCCCCCCCC(O[Si](C(C)(C)C)(C)C)CCCCCCCCCC(=O)OC			ChEMBLE_NTD	1	0.702128	0.851064	0	1
10-[tert-butyl(dimethyl)silyl]oxynonadecanoic acid methyl ester	6188506	CCCCCCCCCC(O[Si](C(C)(C)C)(C)C)CCCCCCCCC(=O)OC			ChEMBLE_NTD	1	0.702128	0.851064	0	1
10-[tert-butyl(dimethyl)silyl]oxyeicosanoic acid methyl ester	6188539	CCCCCCCCCCC(O[Si](C(C)(C)C)(C)C)CCCCCCCCC(=O)OC			ChEMBLE_NTD	1	0.702128	0.851064	0	1
17-[tert-butyl(dimethyl)silyl]oxyeicosanoic acid methyl ester	6188979	CCCC(O[Si](C(C)(C)C)(C)C)CCCCCCCCCCCCCCCC(=O)OC			ChEMBLE_NTD	1	0.702128	0.851064	0	1
14-[tert-butyl(dimethyl)silyl]oxyheptadecanoic acid methyl ester	6188990	CCCC(O[Si](C(C)(C)C)(C)C)CCCCCCCCCCCCC(=O)OC			ChEMBLE_NTD	1	0.702128	0.851064	0	1
16-[tert-butyl(dimethyl)silyl]oxynonadecanoic acid methyl ester	6189001	CCCC(O[Si](C(C)(C)C)(C)C)CCCCCCCCCCCCCCC(=O)OC			ChEMBLE_NTD	1	0.702128	0.851064	0	1
13-[tert-butyl(dimethyl)silyl]oxyhexadecanoic acid methyl ester	6189012	CCCC(O[Si](C(C)(C)C)(C)C)CCCCCCCCCCCC(=O)OC			ChEMBLE_NTD	1	0.702128	0.851064	0	1
15-[tert-butyl(dimethyl)silyl]oxyoctadecanoic acid methyl ester	6189023	CCCC(O[Si](C(C)(C)C)(C)C)CCCCCCCCCCCCCC(=O)OC			ChEMBLE_NTD	1	0.702128	0.851064	0	1
16-[tert-butyl(dimethyl)silyl]oxyeicosanoic acid methyl ester	6189034	CCCCC(O[Si](C(C)(C)C)(C)C)CCCCCCCCCCCCCCC(=O)OC			ChEMBLE_NTD	1	0.702128	0.851064	0	1
13-[tert-butyl(dimethyl)silyl]oxyheptadecanoic acid methyl ester	6189045	CCCCC(O[Si](C(C)(C)C)(C)C)CCCCCCCCCCCC(=O)OC			ChEMBLE_NTD	1	0.702128	0.851064	0	1
15-[tert-butyl(dimethyl)silyl]oxynonadecanoic acid methyl ester	6189056	CCCCC(O[Si](C(C)(C)C)(C)C)CCCCCCCCCCCCCC(=O)OC			ChEMBLE_NTD	1	0.702128	0.851064	0	1
12-[tert-butyl(dimethyl)silyl]oxyhexadecanoic acid methyl ester	6189067	CCCCC(O[Si](C(C)(C)C)(C)C)CCCCCCCCCCC(=O)OC			ChEMBLE_NTD	1	0.702128	0.851064	0	1
14-[tert-butyl(dimethyl)silyl]oxyoctadecanoic acid methyl ester	6189078	CCCCC(O[Si](C(C)(C)C)(C)C)CCCCCCCCCCCCC(=O)OC			ChEMBLE_NTD	1	0.702128	0.851064	0	1
15-[tert-butyl(dimethyl)silyl]oxyeicosanoic acid methyl ester	6189089	CCCCCC(O[Si](C(C)(C)C)(C)C)CCCCCCCCCCCCCC(=O)OC			ChEMBLE_NTD	1	0.702128	0.851064	0	1
12-[tert-butyl(dimethyl)silyl]oxyheptadecanoic acid methyl ester	6189100	CCCCCC(O[Si](C(C)(C)C)(C)C)CCCCCCCCCCC(=O)OC			ChEMBLE_NTD	1	0.702128	0.851064	0	1
14-[tert-butyl(dimethyl)silyl]oxynonadecanoic acid methyl ester	6189111	CCCCCC(O[Si](C(C)(C)C)(C)C)CCCCCCCCCCCCC(=O)OC			ChEMBLE_NTD	1	0.702128	0.851064	0	1
11-[tert-butyl(dimethyl)silyl]oxyhexadecanoic acid methyl ester	6189122	CCCCCC(O[Si](C(C)(C)C)(C)C)CCCCCCCCCC(=O)OC			ChEMBLE_NTD	1	0.702128	0.851064	0	1
13-[tert-butyl(dimethyl)silyl]oxyoctadecanoic acid methyl ester	6189133	CCCCCC(O[Si](C(C)(C)C)(C)C)CCCCCCCCCCCC(=O)OC			ChEMBLE_NTD	1	0.702128	0.851064	0	1
14-[tert-butyl(dimethyl)silyl]oxyeicosanoic acid methyl ester	6189144	CCCCCCC(O[Si](C(C)(C)C)(C)C)CCCCCCCCCCCCC(=O)OC			ChEMBLE_NTD	1	0.702128	0.851064	0	1
11-[tert-butyl(dimethyl)silyl]oxyheptadecanoic acid methyl ester	6189155	CCCCCCC(O[Si](C(C)(C)C)(C)C)CCCCCCCCCC(=O)OC			ChEMBLE_NTD	1	0.702128	0.851064	0	1
13-[tert-butyl(dimethyl)silyl]oxynonadecanoic acid methyl ester	6189166	CCCCCCC(O[Si](C(C)(C)C)(C)C)CCCCCCCCCCCC(=O)OC			ChEMBLE_NTD	1	0.702128	0.851064	0	1
10-[tert-butyl(dimethyl)silyl]oxyhexadecanoic acid methyl ester	6189177	CCCCCCC(O[Si](C(C)(C)C)(C)C)CCCCCCCCC(=O)OC			ChEMBLE_NTD	1	0.702128	0.851064	0	1
12-[tert-butyl(dimethyl)silyl]oxyoctadecanoic acid methyl ester	6189188	CCCCCCC(O[Si](C(C)(C)C)(C)C)CCCCCCCCCCC(=O)OC			ChEMBLE_NTD	1	0.702128	0.851064	0	1
13-[tert-butyl(dimethyl)silyl]oxyeicosanoic acid methyl ester	6189199	CCCCCCCC(O[Si](C(C)(C)C)(C)C)CCCCCCCCCCCC(=O)OC			ChEMBLE_NTD	1	0.702128	0.851064	0	1
10-[tert-butyl(dimethyl)silyl]oxyheptadecanoic acid methyl ester	6189210	CCCCCCCC(O[Si](C(C)(C)C)(C)C)CCCCCCCCC(=O)OC			ChEMBLE_NTD	1	0.702128	0.851064	0	1
12-[tert-butyl(dimethyl)silyl]oxynonadecanoic acid methyl ester	6189221	CCCCCCCC(O[Si](C(C)(C)C)(C)C)CCCCCCCCCCC(=O)OC			ChEMBLE_NTD	1	0.702128	0.851064	0	1
11-[tert-butyl(dimethyl)silyl]oxyoctadecanoic acid methyl ester	6189243	CCCCCCCC(O[Si](C(C)(C)C)(C)C)CCCCCCCCCC(=O)OC			ChEMBLE_NTD	1	0.702128	0.851064	0	1
12-[tert-butyl(dimethyl)silyl]oxyeicosanoic acid methyl ester	6189254	CCCCCCCCC(O[Si](C(C)(C)C)(C)C)CCCCCCCCCCC(=O)OC			ChEMBLE_NTD	1	0.702128	0.851064	0	1
11-[tert-butyl(dimethyl)silyl]oxynonadecanoic acid methyl ester	6189276	CCCCCCCCC(O[Si](C(C)(C)C)(C)C)CCCCCCCCCC(=O)OC			ChEMBLE_NTD	1	0.702128	0.851064	0	1
10-[tert-butyl(dimethyl)silyl]oxyoctadecanoic acid methyl ester	6189298	CCCCCCCCC(O[Si](C(C)(C)C)(C)C)CCCCCCCCC(=O)OC			ChEMBLE_NTD	1	0.702128	0.851064	0	1
18-methylheneicosanoic acid methyl ester	6222133	CCCC(CCCCCCCCCCCCCCCCC(=O)OC)C			ChEMBLE_NTD	1	0.702128	0.851064	0	1
dimethyl dodec-2-enedioate	6263618	COC(=O)CCCCCCCCC=CC(=O)OC			ChEMBLE_NTD	1	0.695652	0.847826	0	1
18-methoxyoctadecanoic acid methyl ester	6336607	COCCCCCCCCCCCCCCCCCC(=O)OC			ChEMBLE_NTD	1	0.695652	0.847826	0	1
Hexanoic acid	1467881737	CCCCCC(=O)O		C01585	ChEMBLE MALARIA,CHEMBL14184	1	0.68	0.84	0	1
9-[tert-butyl(dimethyl)silyl]oxyoctadecanoic acid methyl ester	6188528	CCCCCCCCCC(O[Si](C(C)(C)C)(C)C)CCCCCCCC(=O)OC			ChEMBLE_NTD	1	0.666666	0.833333	0	1
9-[tert-butyl(dimethyl)silyl]oxynonadecanoic acid methyl ester	6188561	CCCCCCCCCCC(O[Si](C(C)(C)C)(C)C)CCCCCCCC(=O)OC			ChEMBLE_NTD	1	0.666666	0.833333	0	1
9-[tert-butyl(dimethyl)silyl]oxyeicosanoic acid methyl ester	6188594	CCCCCCCCCCCC(O[Si](C(C)(C)C)(C)C)CCCCCCCC(=O)OC			ChEMBLE_NTD	1	0.666666	0.833333	0	1
9-[tert-butyl(dimethyl)silyl]oxyhexadecanoic acid methyl ester	6189232	CCCCCCCC(O[Si](C(C)(C)C)(C)C)CCCCCCCC(=O)OC			ChEMBLE_NTD	1	0.666666	0.833333	0	1
9-[tert-butyl(dimethyl)silyl]oxyheptadecanoic acid methyl ester	6189265	CCCCCCCCC(O[Si](C(C)(C)C)(C)C)CCCCCCCC(=O)OC			ChEMBLE_NTD	1	0.666666	0.833333	0	1
(6R,7S)-6,7-Epoxyoctadecanoic acid	1467985501	CCCCCCCCCCCC1OC1CCCCC(=O)O		C13791		1	0.655172	0.827586	0	1
2-Oxo-7-methylthioheptanoic acid	1468017413	CSCCCCCC(=O)C(=O)O		C17220		1	0.642858	0.821429	0	1
9,9-dimethoxynonanoic acid methyl ester	2097014	COC(CCCCCCCC(=O)OC)OC			ChEMBLE_NTD	1	0.641026	0.820513	0	1
9-tridecenoic acid methyl ester	6192980	CCCC=CCCCCCCCC(=O)OC			ChEMBLE_NTD	1	0.641026	0.820513	0	1
2-amino-6-methyleneheptanedioic acid	40344	NC(C(=O)O)CCCC(=C)C(=O)O	DB02892,EXPT00136			1	0.636364	0.818182	0	1
9-chlorononanoic acid methyl ester	6218980	ClCCCCCCCCC(=O)OC			ChEMBLE_NTD	1	0.625	0.8125	0	1
11-oxo-9-undecenoic acid methyl ester	6264377	O=CC=CCCCCCCCC(=O)OC			ChEMBLE_NTD	1	0.617022	0.808511	0	1
(3R,5R)-7-[(1R,2R,6S,8S,8aR)-3,5,6-trihydroxy-2-methyl-8-[(2S)-2-methylbutanoyl]oxy-1,2,4a,5,6,7,8,8a-octahydronaphthalen-1-yl]-3,5-dihydroxy-heptanoic acid	622462	CCC(C(=O)OC1CC(O)C(C2C1C(CCC(CC(CC(=O)O)O)O)C(C(=C2)O)C)O)C			ChEMBLE_NTD	1	0.612904	0.806452	0	1
2,2-difluorotetradecanoic acid	6288771	CCCCCCCCCCCCC(C(=O)O)(F)F			ChEMBLE_NTD	1	0.612904	0.806452	0	1
3-amino-5-methyloctanoic acid	99076406	CCCC(CC(CC(=O)O)N)C		D09627	CHEMBL2103836	1	0.612904	0.806452	0	1
Pravastatin	1467884040	CCC(C(=O)OC1CC(O)C=C2C1C(CCC(CC(CC(=O)O)O)O)C(C=C2)C)C	APRD00328,DB00175	C01844,D08410	ChEMBLE MALARIA,CHEMBL1144,CHEMBL1617336,CHEMBL3544781	1	0.612904	0.806452	0	1
6-[(3,4,5-trimethoxybenzoyl)amino]hexanoic acid	309342	COc1cc(cc(c1OC)OC)C(=O)NCCCCCC(=O)O		D03369	ChEMBLE_NTD,CHEMBL1418182	1	0.6	0.8	0	1
7-[(1R,2R,3R)-3-hydroxy-2-[(4R)-4-hydroxy-4-(1-propylcyclobutyl)but-1-enyl]-5-oxocyclopentyl]heptanoic acid methyl ester	711378	CCCC1(CCC1)C(CC=CC1C(O)CC(=O)C1CCCCCCC(=O)OC)O		D03187	CHEMBL271896,CHEMBL432522	1	0.6	0.8	0	1
8-[tert-butyl(dimethyl)silyl]oxyheptadecanoic acid methyl ester	6188495	CCCCCCCCCC(O[Si](C(C)(C)C)(C)C)CCCCCCC(=O)OC			ChEMBLE_NTD	1	0.6	0.8	0	1
8-[tert-butyl(dimethyl)silyl]oxyoctadecanoic acid methyl ester	6188583	CCCCCCCCCCC(O[Si](C(C)(C)C)(C)C)CCCCCCC(=O)OC			ChEMBLE_NTD	1	0.6	0.8	0	1
8-[tert-butyl(dimethyl)silyl]oxynonadecanoic acid methyl ester	6188616	CCCCCCCCCCCC(O[Si](C(C)(C)C)(C)C)CCCCCCC(=O)OC			ChEMBLE_NTD	1	0.6	0.8	0	1
8-[tert-butyl(dimethyl)silyl]oxyeicosanoic acid methyl ester	6188638	CCCCCCCCCCCCC(O[Si](C(C)(C)C)(C)C)CCCCCCC(=O)OC			ChEMBLE_NTD	1	0.6	0.8	0	1
8-[tert-butyl(dimethyl)silyl]oxyhexadecanoic acid methyl ester	6189287	CCCCCCCCC(O[Si](C(C)(C)C)(C)C)CCCCCCC(=O)OC			ChEMBLE_NTD	1	0.6	0.8	0	1
3-Hydroxypimeloyl-CoA	1467920583	OC(CC(=O)SCCNC(=O)CCNC(=O)C(C(COP(=O)(OP(=O)(OCC1OC(C(C1OP(=O)(O)O)O)n1cnc2c1ncnc2N)O)O)(C)C)O)CCCC(=O)O		C06714		1	0.6	0.8	0	1
3-Oxopimeloyl-CoA	1467920593	O=C(NCCSC(=O)CC(=O)CCCC(=O)O)CCNC(=O)C(C(COP(=O)(OP(=O)(OCC1OC(C(C1OP(=O)(O)O)O)n1cnc2c1ncnc2N)O)O)(C)C)O		C06715		1	0.6	0.8	0	1
2-Methoxyhexadecanoic acid	1467986867	CCCCCCCCCCCCCCC(C(=O)O)OC		C13947		1	0.6	0.8	0	1
pristanate	1468176713	CC(CCCC(C(=O)O)C)CCCC(CCCC(C)C)C			CHEMBL1316599	1	0.6	0.8	0	1
2-Oxophytanate	1467886341	CC(CCCC(C(=O)C(=O)O)C)CCCC(CCCC(C)C)C		C02117		1	0.5625	0.78125	0	1
L-2-Hydroxyphytanate	1467892754	CC(CCCC(C(C(=O)O)O)C)CCCC(CCCC(C)C)C		C02982		1	0.5625	0.78125	0	1
2,6-Dioxo-6-phenylhexanoate	1467898230	O=C(c1ccccc1)CCCC(=O)C(=O)O		C03750		1	0.5625	0.78125	0	1
3alpha,7alpha-Dihydroxy-5beta-cholestanate	1467903809	OC1CCC2(C(C1)CC(C1C2CCC2(C1CCC2C(CCCC(C(=O)O)C)C)C)O)C		C04554		1	0.5625	0.78125	0	1
3alpha,7alpha,12alpha-Trihydroxy-5beta-cholestanoate	1467905117	OC1CCC2(C(C1)CC(C1C2CC(O)C2(C1CCC2C(CCCC(C(=O)O)C)C)C)O)C		C04722		1	0.5625	0.78125	0	1
2,6-Diamino-7-hydroxy-azelaic acid	1467976349	OC(=O)CC(C(CCCC(C(=O)O)N)N)O		C12025		1	0.560976	0.780488	0	1
10-hydroxy-8-decenoic acid methyl ester	6173018	OCC=CCCCCCCC(=O)OC			ChEMBLE_NTD	1	0.55	0.775	0	1
(25R)-3-Oxocholest-4-en-26-oate	1468048282	O=C1CCC2(C(=C1)CCC1C2CCC2(C1CCC2C(CCCC(C(=O)O)C)C)C)C		C20839,C21076	CHEMBL1232254,CHEMBL2387006	1	0.548388	0.774194	0	1
Delta7-Dafachronic acid	1468050050	O=C1CCC2(C(C1)CC=C1C2CCC2(C1CCC2C(CCCC(C(=O)O)C)C)C)C		C21077		1	0.548388	0.774194	0	1
6-methylhexadecanoic acid methyl ester	6221968	CCCCCCCCCCC(CCCCC(=O)OC)C			ChEMBLE_NTD	1	0.538462	0.769231	0	1
7-[tert-butyl(dimethyl)silyl]oxyhexadecanoic acid methyl ester	6188517	CCCCCCCCCC(O[Si](C(C)(C)C)(C)C)CCCCCC(=O)OC			ChEMBLE_NTD	1	0.52381	0.761905	0	1
7-[tert-butyl(dimethyl)silyl]oxyheptadecanoic acid methyl ester	6188550	CCCCCCCCCCC(O[Si](C(C)(C)C)(C)C)CCCCCC(=O)OC			ChEMBLE_NTD	1	0.52381	0.761905	0	1
7-[tert-butyl(dimethyl)silyl]oxyoctadecanoic acid methyl ester	6188627	CCCCCCCCCCCC(O[Si](C(C)(C)C)(C)C)CCCCCC(=O)OC			ChEMBLE_NTD	1	0.52381	0.761905	0	1
7-[tert-butyl(dimethyl)silyl]oxynonadecanoic acid methyl ester	6188649	CCCCCCCCCCCCC(O[Si](C(C)(C)C)(C)C)CCCCCC(=O)OC			ChEMBLE_NTD	1	0.52381	0.761905	0	1
7-[tert-butyl(dimethyl)silyl]oxyeicosanoic acid methyl ester	6188671	CCCCCCCCCCCCCC(O[Si](C(C)(C)C)(C)C)CCCCCC(=O)OC			ChEMBLE_NTD	1	0.52381	0.761905	0	1
dodecyl methyl carbonate	6184592	CCCCCCCCCCCCOC(=O)OC			ChEMBLE_NTD	1	0.509434	0.754717	0	1
4-aminohexanoic acid	2500254	CCC(CCC(=O)O)N	DB04235,EXPT03223			1	0.5	0.75	0	1
8-oxooctanoic acid methyl ester	6267889	O=CCCCCCCC(=O)OC			ChEMBLE_NTD	1	0.5	0.75	0	1
2-Oxohexanoic acid	1467875831	CCCCC(=O)C(=O)O		C00902	CHEMBL3247426	1	0.5	0.75	0	1
L-Norleucine	1467884818	CCCCC(C(=O)O)N		C01933	CHEMBL292439	1	0.5	0.75	0	1
3-Oxohexanoic acid	1467886367	CCCC(=O)CC(=O)O		C02122		1	0.5	0.75	0	1
5-Oxohexanoic acid	1467886430	CC(=O)CCCC(=O)O		C02129		1	0.5	0.75	0	1
6-Aminohexanoate	1467888466	NCCCCCC(=O)O	APRD00791,DB00513,DB04134,EXPT00408,EXPT00461	C02378,D00160	ChEMBLE_NTD,CHEMBL1046	1	0.5	0.75	0	1
Adipate semialdehyde	1467915001	O=CCCCCC(=O)O		C06102		1	0.5	0.75	0	1
6-Hydroxyhexanoic acid	1467915014	OCCCCCC(=O)O		C06103	CHEMBL2006530	1	0.5	0.75	0	1
Lipoxin A4	1467916546	CCCCCC(C=CC=CC=CC=CC(C(CCCC(=O)O)O)O)O		C06314	CHEMBL392438,CHEMBL402643	1	0.5	0.75	0	1
Atorvastatin	1467921677	OC(CC(CC(=O)O)O)CCn1c(C(C)C)c(c(c1c1ccc(cc1)F)c1ccccc1)C(=O)Nc1ccccc1	APRD00055,DB01076	C06834,D07474	ChEMBLE MALARIA,CHEMBL1487,CHEMBL3392029	1	0.5	0.75	0	1
vinyl nonanoate	1941801	CCCCCCCCC(=O)OC=C			ChEMBLE_NTD	1	0.471698	0.735849	0	1
chloromethyl nonanoate	6174635	CCCCCCCCC(=O)OCCl			ChEMBLE_NTD	1	0.471698	0.735849	0	1
4-ethyl-2-methyleneoctanoic acid	2780306	CCCCC(CC(=C)C(=O)O)CC			ChEMBLE_NTD	1	0.470588	0.735294	0	1
(2R)-2-propyloctanoic acid	3156649	CCCCCCC(C(=O)O)CCC	DB05343,DB11887	D06296	CHEMBL2107727,CHEMBL3187683	1	0.470588	0.735294	0	1
3-amino-9-methoxy-2,6,8-trimethyl-10-phenyldecanoic acid	51762626	COC(C(CC(CCC(C(C(=O)O)C)N)C)C)Cc1ccccc1	DB02506,EXPT00428			1	0.470588	0.735294	0	1
8-methoxyoctanoic acid methyl ester	6337650	COCCCCCCCC(=O)OC			ChEMBLE_NTD	1	0.469388	0.734694	0	1
2,2-dichloroethyl tridecanoate	6197999	CCCCCCCCCCCCC(=O)OCC(Cl)Cl			ChEMBLE_NTD	1	0.461884	0.730942	0	1
2,6-diamino-7-benzyloxy-7-oxo-heptanoic acid	3663821	O=C(C(CCCC(C(=O)O)N)N)OCc1ccccc1			ChEMBLE_NTD	1	0.454546	0.727273	0	1
5-oxo-5-(3,4,5-trimethoxyphenyl)pentanoic acid	4358365	COc1cc(cc(c1OC)OC)C(=O)CCCC(=O)O			ChEMBLE_NTD	1	0.454546	0.727273	0	1
6-nonynoic acid	6261013	CCC#CCCCCC(=O)O			ChEMBLE_NTD	1	0.448276	0.724138	0	1
(6Z,9Z,12Z)-Octadecatrienoic acid	1467917697	CCCCCC=CCC=CCC=CCCCCC(=O)O	DB13854	C06426,D07213	CHEMBL464982	1	0.448276	0.724138	0	1
chloromethyl 9-chlorononanoate	6174602	ClCCCCCCCCC(=O)OCCl			ChEMBLE_NTD	1	0.444444	0.722222	0	1
Pentanoate	1467874723	CCCCC(=O)O	DB02406,DB04344,EXPT02547	C00803	CHEMBL268736	1	0.44	0.72	0	1
2,2-dichloroethyl dodecanoate	6197845	CCCCCCCCCCCC(=O)OCC(Cl)Cl			ChEMBLE_NTD	1	0.435114	0.717557	0	1
(2R,6S)-2,6-diamino-7-methyl-5-oxononanedioic acid	3022726	OC(=O)CC(C(C(=O)CCC(C(=O)O)N)N)C			ChEMBLE_NTD	1	0.434782	0.717391	0	1
2,2,2-trichloroethyl tridecanoate	6197779	CCCCCCCCCCCCC(=O)OCC(Cl)(Cl)Cl			ChEMBLE_NTD	1	0.42358	0.71179	0	1
2-propylhexanedioic acid	3741190	CCCC(C(=O)O)CCCC(=O)O			ChEMBLE_NTD	1	0.422222	0.711111	0	1
2-chloroethyl undecanoate	6198076	CCCCCCCCCCC(=O)OCCCl			ChEMBLE_NTD	1	0.410714	0.705357	0	1
6-[methyl(p-tolylsulfonyl)amino]hexanoic acid	3431056	CN(S(=O)(=O)c1ccc(cc1)C)CCCCCC(=O)O			ChEMBLE_NTD	1	0.4	0.7	0	1
2,3-dimethoxypropyl tridecanoate	6208914	CCCCCCCCCCCCC(=O)OCC(COC)OC			ChEMBLE_NTD	1	0.399142	0.699571	0	1
chloromethyl octanoate	6174646	CCCCCCCC(=O)OCCl			ChEMBLE_NTD	1	0.396226	0.698113	0	1
7-chloroheptanoic acid methyl ester	6219024	ClCCCCCCC(=O)OC			ChEMBLE_NTD	1	0.395348	0.697674	0	1
2-hex-5-enylbutanedioic acid	6270858	C=CCCCCC(C(=O)O)CC(=O)O			ChEMBLE_NTD	1	0.391304	0.695652	0	1
ethyl 2-hydroxytetradecanoate	6289044	CCCCCCCCCCCCC(C(=O)OCC)O			ChEMBLE_NTD	1	0.391304	0.695652	0	1
tert-butyl 12-(methylamino)dodecanoate	6328759	CNCCCCCCCCCCCC(=O)OC(C)(C)C			ChEMBLE_NTD	1	0.390624	0.695312	0	1
benzyl tridecanoate	6216947	CCCCCCCCCCCCC(=O)OCc1ccccc1			ChEMBLE_NTD	1	0.387234	0.693617	0	1
7-acetyloxytridecanoic acid methyl ester	6315435	CCCCCCC(OC(=O)C)CCCCCC(=O)OC			ChEMBLE_NTD	1	0.381294	0.690647	0	1
2-iodoethyl decanoate	6192655	CCCCCCCCCC(=O)OCCI			ChEMBLE_NTD	1	0.37931	0.689655	0	1
propyl icosanoate	6193354	CCCCCCCCCCCCCCCCCCCC(=O)OCCC			ChEMBLE_NTD	1	0.37931	0.689655	0	1
propyl heptadecanoate	6193365	CCCCCCCCCCCCCCCCC(=O)OCCC			ChEMBLE_NTD	1	0.37931	0.689655	0	1
2-chloroethyl icosanoate	6198021	CCCCCCCCCCCCCCCCCCCC(=O)OCCCl			ChEMBLE_NTD	1	0.37931	0.689655	0	1
2-chloroethyl heptadecanoate	6198032	CCCCCCCCCCCCCCCCC(=O)OCCCl			ChEMBLE_NTD	1	0.37931	0.689655	0	1
2-chloroethyl nonadecanoate	6198043	CCCCCCCCCCCCCCCCCCC(=O)OCCCl			ChEMBLE_NTD	1	0.37931	0.689655	0	1
2-chloroethyl pentadecanoate	6198054	CCCCCCCCCCCCCCC(=O)OCCCl			ChEMBLE_NTD	1	0.37931	0.689655	0	1
2-chloroethyl tridecanoate	6198065	CCCCCCCCCCCCC(=O)OCCCl			ChEMBLE_NTD	1	0.37931	0.689655	0	1
6-[tert-butyl(dimethyl)silyl]oxyhexadecanoic acid methyl ester	6188572	CCCCCCCCCCC(O[Si](C(C)(C)C)(C)C)CCCCC(=O)OC			ChEMBLE_NTD	1	0.371428	0.685714	0	1
6-[tert-butyl(dimethyl)silyl]oxyheptadecanoic acid methyl ester	6188605	CCCCCCCCCCCC(O[Si](C(C)(C)C)(C)C)CCCCC(=O)OC			ChEMBLE_NTD	1	0.371428	0.685714	0	1
6-[tert-butyl(dimethyl)silyl]oxyoctadecanoic acid methyl ester	6188660	CCCCCCCCCCCCC(O[Si](C(C)(C)C)(C)C)CCCCC(=O)OC			ChEMBLE_NTD	1	0.371428	0.685714	0	1
6-[tert-butyl(dimethyl)silyl]oxynonadecanoic acid methyl ester	6188693	CCCCCCCCCCCCCC(O[Si](C(C)(C)C)(C)C)CCCCC(=O)OC			ChEMBLE_NTD	1	0.371428	0.685714	0	1
6-[tert-butyl(dimethyl)silyl]oxyeicosanoic acid methyl ester	6188715	CCCCCCCCCCCCCCC(O[Si](C(C)(C)C)(C)C)CCCCC(=O)OC			ChEMBLE_NTD	1	0.371428	0.685714	0	1
2-methylnonanoic acid methyl ester	6198999	CCCCCCCC(C(=O)OC)C			ChEMBLE_NTD	1	0.371428	0.685714	0	1
6-acetyloxytridecanoic acid methyl ester	6313781	CCCCCCCC(OC(=O)C)CCCCC(=O)OC			ChEMBLE_NTD	1	0.371428	0.685714	0	1
docosa-7,10,13,16,19-pentaenoic acid methyl ester	6222100	CCC=CCC=CCC=CCC=CCC=CCCCCCC(=O)OC			ChEMBLE_NTD	1	0.363636	0.681818	0	1
docosa-7,10,13,16-tetraenoic acid methyl ester	6222111	CCCCCC=CCC=CCC=CCC=CCCCCCC(=O)OC			ChEMBLE_NTD	1	0.363636	0.681818	0	1
ethyl 2-chloroundecanoate	6219079	CCCCCCCCCC(C(=O)OCC)Cl			ChEMBLE_NTD	1	0.36207	0.681035	0	1
5-acetyloxytridecanoic acid methyl ester	6315869	CCCCCCCCC(OC(=O)C)CCCC(=O)OC			ChEMBLE_NTD	1	0.361702	0.680851	0	1
(2S)-2-amino-6-hydroxyhexanoic acid	2114249	OCCCCC(C(=O)O)N	DB03412,EXPT02015		CHEMBL1233976,CHEMBL1993456	1	0.354838	0.677419	0	1
3-methoxyhexanoic acid	4214918	CCCC(CC(=O)O)OC			ChEMBLE_NTD	1	0.354838	0.677419	0	1
Triacetate	1467883303	CC(=O)CC(=O)CC(=O)O		C01757		1	0.354838	0.677419	0	1
6-Amino-2-oxohexanoate	1467894805	NCCCCC(=O)C(=O)O		C03239		1	0.354838	0.677419	0	1
(S)-5-Amino-3-oxohexanoic acid	1467897512	CC(CC(=O)CC(=O)O)N		C03656		1	0.354838	0.677419	0	1
L-2-Aminoadipate 6-semialdehyde	1467900456	O=CCCCC(C(=O)O)N		C04076		1	0.354838	0.677419	0	1
2-Amino-5-oxohexanoate	1467912598	CC(=O)CCC(C(=O)O)N		C05825		1	0.354838	0.677419	0	1
4-Hydroxy-2-oxohexanoic acid	1467921055	CCC(CC(=O)C(=O)O)O		C06762		1	0.354838	0.677419	0	1
chloromethyl 8-chlorooctanoate	6174591	ClCCCCCCCC(=O)OCCl			ChEMBLE_NTD	1	0.347826	0.673913	0	1
chloromethyl 6-chlorononanoate	6174503	CCCC(CCCCC(=O)OCCl)Cl			ChEMBLE_NTD	1	0.344828	0.672414	0	1
2-chloroethyl nonanoate	6192892	CCCCCCCCC(=O)OCCCl			ChEMBLE_NTD	1	0.344828	0.672414	0	1
2-iodoethyl nonanoate	6192925	CCCCCCCCC(=O)OCCI			ChEMBLE_NTD	1	0.344828	0.672414	0	1
2,2,2-trichloroethyl dodecanoate	6197680	CCCCCCCCCCCC(=O)OCC(Cl)(Cl)Cl			ChEMBLE_NTD	1	0.335968	0.667984	0	1
5-[(3aS,5R,6R,6aS)-5-hydroxy-6-[(3S)-3-hydroxyoct-1-enyl]-1,3a,4,5,6,6a-hexahydropentalen-2-yl]pentanoic acid methyl ester	648866	CCCCCC(C=CC1C(O)CC2C1CC(=C2)CCCCC(=O)OC)O		D02048	CHEMBL2104163	1	0.333334	0.666667	0	1
6-hydroxy-8-methoxyoctanoic acid methyl ester	6338002	COCCC(CCCCC(=O)OC)O			ChEMBLE_NTD	1	0.333334	0.666667	0	1
4-[3-[(1E,3E,5Z,8Z,11Z)-tetradeca-1,3,5,8,11-pentaenyl]oxiran-2-yl]butanoic acid	95285114	CCC=CCC=CCC=CC=CC=CC1OC1CCCC(=O)O				1	0.333334	0.666667	0	1
Leukotriene A4	1467875902	CCCCCC=CCC=CC=CC=CC1OC1CCCC(=O)O		C00909	CHEMBL69439	1	0.333334	0.666667	0	1
propyl octadec-9-enoate	652950	CCCCCCCCC=CCCCCCCCC(=O)OCCC			ChEMBLE_NTD	1	0.322034	0.661017	0	1
2-hydroxyethyl octadec-9-enoate	1919585	CCCCCCCCC=CCCCCCCCC(=O)OCCO		D08973	CHEMBL3182752	1	0.322034	0.661017	0	1
chloromethyl 5-chlorononanoate	6174437	CCCCC(CCCC(=O)OCCl)Cl			ChEMBLE_NTD	1	0.322034	0.661017	0	1
2-amino-3-cyclohexylpropanoic acid	2092009	NC(C(=O)O)CC1CCCCC1	DB02884,EXPT01686		CHEMBL383208,CHEMBL441123	1	0.31579	0.657895	0	1
4-cyclohexyl-2-(methylamino)butanoic acid	3310805	CNC(C(=O)O)CCC1CCCCC1			ChEMBLE_NTD	1	0.31579	0.657895	0	1
(4S,5R,6R,7R,8R)-4,5,6,7,8-pentahydroxy-2-oxo-9-phosphonooxynonanoic acid	779334169	OC(C(C(C(CC(=O)C(=O)O)O)O)O)C(COP(=O)(O)O)O				1	0.31579	0.657895	0	1
3-Deoxy-D-manno-octulosonate	1467878539	OCC(C(C(C(CC(=O)C(=O)O)O)O)O)O		C01187		1	0.31579	0.657895	0	1
3-Deoxy-D-manno-octulosonate 8-phosphate	1467903231	OC(C(C(C(CC(=O)C(=O)O)O)O)O)COP(=O)(O)O		C04478		1	0.31579	0.657895	0	1
5,12,20-trihydroxyicosa-6,8,14-trienoic acid	2371930	OCCCCCC=CCC(CCC=CC=CC(CCCC(=O)O)O)O				1	0.3125	0.65625	0	1
(2S)-2-amino-6-[6-(2-methoxyethoxy)hexanoylamino]hexanoic acid	622315263	COCCOCCCCCC(=O)NCCCCC(C(=O)O)N	DB12839			1	0.3125	0.65625	0	1
(6E,8Z,11Z,14Z,17Z)-5-oxoicosa-6,8,11,14,17-pentaenoic acid	793564799	CCC=CCC=CCC=CCC=CC=CC(=O)CCCC(=O)O				1	0.3125	0.65625	0	1
N6-Hydroxy-L-lysine	1467877018	ONCCCCC(C(=O)O)N		C01028		1	0.3125	0.65625	0	1
Homoarginine	1467884734	NC(=N)NCCCCC(C(=O)O)N	DB03974,EXPT01779	C01924	CHEMBL589752	1	0.3125	0.65625	0	1
Leukotriene B4	1467886730	CCCCCC=CCC(C=CC=CC=CC(CCCC(=O)O)O)O	DB12961	C02165	CHEMBL65061	1	0.3125	0.65625	0	1
N6-Methyl-L-lysine	1467890946	CNCCCCC(C(=O)O)N	DB01714,EXPT02190	C02728	ChEMBLE_NTD	1	0.3125	0.65625	0	1
6-Acetamido-3-oxohexanoate	1467897768	CC(=O)NCCCC(=O)CC(=O)O		C03682		1	0.3125	0.65625	0	1
6-Acetamido-3-aminohexanoate	1467898866	CC(=O)NCCCC(CC(=O)O)N		C03846,C21604		1	0.3125	0.65625	0	1
5(S)-HETE	1467905712	CCCCCC=CCC=CCC=CC=CC(CCCC(=O)O)O		C04805	ChEMBLE_NTD,CHEMBL164813,CHEMBL17695	1	0.3125	0.65625	0	1
20-OH-Leukotriene B4	1467906075	OCCCCCC=CCC(C=CC=CC=CC(CCCC(=O)O)O)O		C04853	CHEMBL1593789	1	0.3125	0.65625	0	1
6-Acetamido-2-oxohexanoate	1467910328	CC(=O)NCCCCC(=O)C(=O)O		C05548		1	0.3125	0.65625	0	1
Biocytin	1467910352	O=C(NCCCCC(C(=O)O)N)CCCCC1SCC2C1NC(=O)N2		C05552	CHEMBL1473893	1	0.3125	0.65625	0	1
12-Keto-leukotriene B4	1467913584	CCCCCC=CCC(=O)C=CC=CC=CC(CCCC(=O)O)O		C05949		1	0.3125	0.65625	0	1
Lipoxin B4	1467916562	CCCCCC(C(C=CC=CC=CC=CC(CCCC(=O)O)O)O)O		C06315		1	0.3125	0.65625	0	1
2-(2-hydroxyethylamino)ethyl dodecanoate	2781878	CCCCCCCCCCCC(=O)OCCNCCO			ChEMBLE_NTD	1	0.30137	0.650685	0	1
chloromethyl 4-chlorononanoate	6174382	CCCCCC(CCC(=O)OCCl)Cl			ChEMBLE_NTD	1	0.3	0.65	0	1
3-chloropropyl decanoate	6173436	CCCCCCCCCC(=O)OCCCCl			ChEMBLE_NTD	1	0.290322	0.645161	0	1
2-Oxo-6-methylthiohexanoic acid	1468017375	CSCCCCC(=O)C(=O)O		C17216		1	0.290322	0.645161	0	1
chloromethyl heptanoate	6174613	CCCCCCC(=O)OCCl			ChEMBLE_NTD,CHEMBL152236	1	0.288888	0.644444	0	1
3-Oxopentanoic acid	1467887301	CCC(=O)CC(=O)O		C02233		1	0.285714	0.642857	0	1
5-Hydroxypentanoate	1467891513	OCCCCC(=O)O	DB04781	C02804	CHEMBL1205948	1	0.285714	0.642857	0	1
5-Oxopentanoate	1467895003	O=CCCCC(=O)O		C03273		1	0.285714	0.642857	0	1
2-Oxopentanoic acid	1467916250	CCCC(=O)C(=O)O		C06255	CHEMBL1162544	1	0.285714	0.642857	0	1
(4R)-6-phenyl-4-(7-phenylheptanoylamino)hexanoic acid	5470015	O=C(NC(CCc1ccccc1)CCC(=O)O)CCCCCCc1ccccc1	DB03471,EXPT00747			1	0.282052	0.641026	0	1
(6Z)-Octadecenoic acid	1467933791	CCCCCCCCCCCC=CCCCCC(=O)O		C08363	CHEMBL3139878	1	0.282052	0.641026	0	1
(3R)-3-Isopropenyl-6-oxoheptanoate	1467970135	CC(=O)CCC(C(=C)C)CC(=O)O		C11405,C11419		1	0.277778	0.638889	0	1
20-Hydroxyleukotriene E4	1467896955	OCCCCCC=CCC=CC=CC=CC(C(CCCC(=O)O)O)SCC(C(=O)O)N		C03577		1	0.276596	0.638298	0	1
2-iodoethyl octanoate	6193013	CCCCCCCC(=O)OCCI			ChEMBLE_NTD	1	0.275862	0.637931	0	1
2,2-dichloroethyl decanoate	6197823	CCCCCCCCCC(=O)OCC(Cl)Cl			ChEMBLE_NTD	1	0.269842	0.634921	0	1
2,2-dichloroethyl icosanoate	6197856	CCCCCCCCCCCCCCCCCCCC(=O)OCC(Cl)Cl			ChEMBLE_NTD	1	0.269842	0.634921	0	1
2,2-dichloroethyl heptadecanoate	6197867	CCCCCCCCCCCCCCCCC(=O)OCC(Cl)Cl			ChEMBLE_NTD	1	0.269842	0.634921	0	1
2,2-dichloroethyl hexadecanoate	6197889	CCCCCCCCCCCCCCCC(=O)OCC(Cl)Cl			ChEMBLE_NTD	1	0.269842	0.634921	0	1
2,2-dichloroethyl nonadecanoate	6197911	CCCCCCCCCCCCCCCCCCC(=O)OCC(Cl)Cl			ChEMBLE_NTD	1	0.269842	0.634921	0	1
2,2-dichloroethyl octadecanoate	6197933	CCCCCCCCCCCCCCCCCC(=O)OCC(Cl)Cl			ChEMBLE_NTD	1	0.269842	0.634921	0	1
2,2-dichloroethyl pentadecanoate	6197955	CCCCCCCCCCCCCCC(=O)OCC(Cl)Cl			ChEMBLE_NTD	1	0.269842	0.634921	0	1
2,2-dichloroethyl tetradecanoate	6197988	CCCCCCCCCCCCCC(=O)OCC(Cl)Cl			ChEMBLE_NTD	1	0.269842	0.634921	0	1
2,2-dichloroethyl undecanoate	6198010	CCCCCCCCCCC(=O)OCC(Cl)Cl			ChEMBLE_NTD	1	0.269842	0.634921	0	1
[tert-butyl(dimethyl)silyl] tridecanoate	6206508	CCCCCCCCCCCCC(=O)O[Si](C(C)(C)C)(C)C			ChEMBLE_NTD	1	0.264	0.632	0	1
2-Dehydro-3-deoxy-D-arabino-heptonate 7-phosphate	1467904896	OC(C(C(CC(=O)C(=O)O)O)O)COP(=O)(O)O		C04691		1	0.263158	0.631579	0	1
Leukotriene F4	1467918028	CCCCCC=CCC=CC=CC=CC(C(CCCC(=O)O)O)SCC(C(=O)O)NC(=O)CCC(C(=O)O)N		C06462	CHEMBL2074920	1	0.26087	0.630435	0	1
N-Acetylleukotriene E4	1467969624	CCCCCC=CCC=CC=CC=CC(C(CCCC(=O)O)O)SCC(C(=O)O)NC(=O)C		C11361	CHEMBL1886123,CHEMBL2074714	1	0.26087	0.630435	0	1
Isocaproate	1468098234	CC(CCC(=O)O)C		C21399	CHEMBL1230308	1	0.25926	0.62963	0	1
3-chloropropyl nonanoate	6173491	CCCCCCCCC(=O)OCCCCl			ChEMBLE_NTD	1	0.258064	0.629032	0	1
chloromethyl 3-chlorononanoate	6174327	CCCCCCC(CC(=O)OCCl)Cl			ChEMBLE_NTD	1	0.254902	0.627451	0	1
chloromethyl 5-chlorooctanoate	6174448	CCCC(CCCC(=O)OCCl)Cl			ChEMBLE_NTD	1	0.254238	0.627119	0	1
4-(3-hydroxy-2,3,4,7,8,9,10,11,12,13,14,15,16,17-tetradecahydro-1H-cyclopenta[a]phenanthren-17-yl)pentanoic acid	6263565	OC1CCC2C(=CCC3C2CCC2C3CCC2C(CCC(=O)O)C)C1			ChEMBLE_NTD	1	0.25	0.625	0	1
2-hydroxy-14-methylhexadecanoic acid methyl ester	6221902	CCC(CCCCCCCCCCCC(C(=O)OC)O)C			ChEMBLE_NTD	1	0.24031	0.620155	0	1
2,2-dichloroethyl nonanoate	6197922	CCCCCCCCC(=O)OCC(Cl)Cl			ChEMBLE_NTD	1	0.238096	0.619048	0	1
5-[(4R,5R)-5-hydroxy-4-[(3S)-3-hydroxyoct-1-enyl]-1-phenyl-5,6-dihydro-4H-cyclopenta[b]pyrrol-2-yl]pentanoic acid	2213697	CCCCCC(C=CC1C(O)Cc2c1cc(n2c1ccccc1)CCCCC(=O)O)O		D05498	CHEMBL2105239	1	0.235294	0.617647	0	1
2-bromo-5,5-dimethylhexanoic acid	3291852	BrC(C(=O)O)CCC(C)(C)C			ChEMBLE_NTD	1	0.235294	0.617647	0	1

## Sheet: S8.2
Susbtrate name	Substrate NICEdrug ID	Substrate DrugBank ID	Substrate KEGG ID	Substrate ChEMBL ID	Product name	Product NICEdrug ID	Product SMILES	Product DrugBank ID	Product KEGG ID	Product ChEMBL ID	Alpha score within NICEdrug score	Beta score within NICEdrug score	NICEdrug score
Betulinic acid	1467936908	DB05910,DB12480	C08619	ChEMBLE_NTD,CHEMBL1318530,CHEMBL269277,CHEMBL519059	(1R,3aS,5aR,5bR,7aR,9S,11aR,11bR,13aR,13bR)-N-(7-acetamidoheptyl)-9-hydroxy-1-isopropenyl-5a,5b,8,8,11a-pentamethyl-1,2,3,4,5,6,7,7a,9,10,11,11b,12,13,13a,13b-hexadecahydrocyclopenta[a]chrysene-3a-carboxamide	61179432	CC(=O)NCCCCCCCNC(=O)C12CCC(C2C2C(CC1)(C)C1(C)CCC3C(C1CC2)(C)CCC(C3(C)C)O)C(=C)C			CHEMBL508943	1	0.928571	0.964286
IDP	1467866932		C00104	CHEMBL1233551	[(2R,3S,4R,5R)-5-[6-(8-acetamidooctylamino)-9-purinyl]-3,4-dihydroxy-2-oxolanyl]methyl phosphono hydrogen phosphate	667267193	CC(=O)NCCCCCCCCNc1ncnc2c1ncn2C1OC(C(C1O)O)COP(=O)(OP(=O)(O)O)O			CHEMBL3307149	1	0.928571	0.964286
IMP	1467867285		C00130	ChEMBLE_NTD,CHEMBL1207374	[5-[6-(8-acetamidooctylamino)-9-purinyl]-3,4-dihydroxy-2-oxolanyl]methyl dihydrogen phosphate	279586109	CC(=O)NCCCCCCCCNc1ncnc2c1ncn2C1OC(C(C1O)O)COP(=O)(O)O			CHEMBL610696	1	0.928571	0.964286
6-acetamidohexanoic acid	21095		D07074	ChEMBLE_NTD,CHEMBL2105922	6-acetamido-N-methylhexanamide	4485174	CNC(=O)CCCCCNC(=O)C			CHEMBL337259	1	0.928571	0.964286
6-acetamidohexanoic acid	21095		D07074	ChEMBLE_NTD,CHEMBL2105922	6-acetamido-N,N-dimethylhexanamide	4485672	CC(=O)NCCCCCC(=O)N(C)C			CHEMBL132493	1	0.928571	0.964286
4-Methoxybenzoate	1467889450	DB02795,EXPT00523	C02519	CHEMBL21932	N-(6-acetamidohexyl)-4-methoxybenzamide	550519715	COc1ccc(cc1)C(=O)NCCCCCCNC(=O)C			CHEMBL3120717	1	0.928571	0.964286
Dodecylaldehyde	1467887659		C02278	CHEMBL2228373	N-dodecylacetamide	201984	CCCCCCCCCCCCNC(=O)C			CHEMBL1985394	1	0.928571	0.964286
2-acetamido-N-benzyl-6-(propylamino)hexanamide	4764817			ChEMBLE_NTD,CHEMBL2002562	2-acetamido-N-benzyl-6-[[methyl(nitroso)carbamoyl]-propyl-amino]hexanamide	4764949	CCCN(C(=O)N(N=O)C)CCCCC(C(=O)NCc1ccccc1)NC(=O)C			CHEMBL1980440	1	0.857143	0.928571
2-acetamido-N-benzyl-6-(propylamino)hexanamide	4764817			ChEMBLE_NTD,CHEMBL2002562	2-acetamido-N-benzyl-6-[methylcarbamoyl(propyl)amino]hexanamide	4764916	CCCN(C(=O)NC)CCCCC(C(=O)NCc1ccccc1)NC(=O)C			ChEMBLE_NTD,CHEMBL2001640	1	0.857143	0.928571
N-acetylglycine	1468089412	DB02713,EXPT00379		CHEMBL289004	N-(2-oxo-3-phenylpropyl)acetamide	6257327	O=C(Cc1ccccc1)CNC(=O)C			ChEMBLE_NTD	1	0.857143	0.928571
Phenylacetyl-CoA	1467872545		C00582	CHEMBL3526286	N-(2-oxo-3-phenylpropyl)acetamide	6257327	O=C(Cc1ccccc1)CNC(=O)C			ChEMBLE_NTD	1	0.857143	0.928571
2-Pyridinemethanamine	1468023533		C17926	CHEMBL32189	N-(2-pyridylmethyl)acetamide	50631163	CC(=O)NCc1ccccn1			CHEMBL3244510	1	0.857143	0.928571
N6-Acetyl-L-lysine	1467890934		C02727	CHEMBL1230958	N-[(5S)-5-amino-6-[(1S,5R)-2-azabicyclo[3.1.0]hexan-2-yl]-6-oxohexyl]acetamide	280366340	CC(=O)NCCCCC(C(=O)N1CCC2C1C2)N			CHEMBL236097	1	0.857143	0.928571
2-pyridylethylamine	1468286738			ChEMBLE_NTD,CHEMBL32813	N-[2-(2-pyridyl)ethyl]acetamide	3454513	CC(=O)NCCc1ccccn1			CHEMBL3244511	1	0.857143	0.928571
Estragole	1467959455		C10452	CHEMBL470671	N-[3-(4-methoxyphenyl)propyl]acetamide	102026441	COc1ccc(cc1)CCCNC(=O)C			CHEMBL49976	1	0.857143	0.928571
N2-Acetyl-L-lysine	1467982462		C12989	CHEMBL1241437	[(5S)-5-acetamido-6-amino-6-oxohexyl]ammonium	65921480	CC(=O)NC(C(=O)N)CCCC[NH3+]			CHEMBL67335	1	0.809524	0.904762
2-(2-Aminoethyl)indole	1467889656		C02548		N-[2-(1H-indol-2-yl)ethyl]acetamide	101778140	CC(=O)NCCc1cc2c([nH]1)cccc2			CHEMBL99083	1	0.809524	0.904762
dihydroconiferyl aldehyde	1469347182			ChEMBLE_NTD	N-[3-(4-hydroxy-3-methoxyphenyl)propyl]acetamide	299332083	COc1cc(CCCNC(=O)C)ccc1O			CHEMBL1092047	1	0.809524	0.904762
Eugenol	1467959469	DB09086	C10453,D04117	ChEMBLE_NTD,CHEMBL42710	N-[3-(4-hydroxy-3-methoxyphenyl)propyl]acetamide	299332083	COc1cc(CCCNC(=O)C)ccc1O			CHEMBL1092047	1	0.809524	0.904762
N2-Acetyl-L-aminoadipate semialdehyde	1467982452		C12988		(2S)-2-acetamido-6-(ethanethioylamino)hexanoic acid	280162342	CC(=S)NCCCCC(C(=O)O)NC(=O)C			CHEMBL377314	1	0.785714	0.892857
[3-[acetyl(methyl)amino]-1-phenyl-propyl] acetate	6191793			ChEMBLE_NTD	(3-acetamido-1-phenyl-propyl) acetate	6191815	CC(=O)OC(c1ccccc1)CCNC(=O)C			ChEMBLE_NTD	1	0.785714	0.892857
2-acetamido-N-benzyl-6-[benzyl(methylcarbamoyl)amino]hexanamide	4764927			ChEMBLE_NTD,CHEMBL1976832	2-acetamido-N-benzyl-6-(benzylamino)hexanamide	4764828	CC(=O)NC(C(=O)NCc1ccccc1)CCCCNCc1ccccc1			ChEMBLE_NTD,CHEMBL1989116	1	0.785714	0.892857
3-acetyl-4,4-dimethyl-2-(2-oxopropyl)-1-cyclopentanecarboxylic acid methyl ester	6301020			ChEMBLE_NTD	3-ethoxy-5-(propoxymethyl)-4,5-dihydroisoxazole	6306097	CC(CCC1=C(C)C2C(O1)CC1C2(C)CCC2C1CCC1C2(C)CCC(C1)OC(=O)C)CNC(=O)C			ChEMBLE_NTD	1	0.785714	0.892857
3,5-dinitrobenzoic acid [10,13-dimethyl-17-(6-methylheptan-2-yl)-2,3,4,5,6,7,8,9,11,12,14,15,16,17-tetradecahydro-1H-cyclopenta[a]phenanthren-16-yl] ester	6300874			ChEMBLE_NTD,CHEMBL3260719	3-ethoxy-5-(propoxymethyl)-4,5-dihydroisoxazole	6306097	CC(CCC1=C(C)C2C(O1)CC1C2(C)CCC2C1CCC1C2(C)CCC(C1)OC(=O)C)CNC(=O)C			ChEMBLE_NTD	1	0.785714	0.892857
2-pyridinamine	108039			ChEMBLE MALARIA,CHEMBL21619	N-(2-pyridyl)acetamide	722070	CC(=O)Nc1ccccn1			CHEMBL12132	1	0.785714	0.892857
3-[[(Z)-4-oxopent-2-en-2-yl]amino]-2-azepanone	53409908			ChEMBLE_NTD	N-[(3S)-2-oxoazepan-3-yl]acetamide	104071509	CC(=O)NC1CCCCNC1=O			CHEMBL40067	1	0.785714	0.892857
L-Lysine 1,6-lactam	1467891745		C02837,C05328	CHEMBL288850,CHEMBL40172	N-[(3S)-2-oxoazepan-3-yl]acetamide	104071509	CC(=O)NC1CCCCNC1=O			CHEMBL40067	1	0.785714	0.892857
N2-Acetyl-L-lysine	1467982462		C12989	CHEMBL1241437	N-[(3S)-2-oxoazepan-3-yl]acetamide	104071509	CC(=O)NC1CCCCNC1=O			CHEMBL40067	1	0.785714	0.892857
5-Acetamidopentanoate	1467893633		C03087		N-[(5-oxo-2-oxolanyl)methyl]acetamide	6256713	CC(=O)NCC1CCC(=O)O1			ChEMBLE_NTD	1	0.785714	0.892857
Furfural	1467989418		C14279	CHEMBL189362	N-[2-(2-furyl)-1-hydroxy-2-oxo-ethyl]acetamide	31400687	CC(=O)NC(C(=O)c1ccco1)O			CHEMBL1516796	1	0.785714	0.892857
N-methyl-N-[3-phenyl-3-[4-(trifluoromethyl)phenoxy]propyl]acetamide	6191782			ChEMBLE_NTD	N-[3-phenyl-3-[4-(trifluoromethyl)phenoxy]propyl]acetamide	6191804	CC(=O)NCCC(c1ccccc1)Oc1ccc(cc1)C(F)(F)F			ChEMBLE_NTD	1	0.785714	0.892857
Norfluoxetine	1469260706	DB06731		CHEMBL1494,CHEMBL446084,CHEMBL465123	N-[3-phenyl-3-[4-(trifluoromethyl)phenoxy]propyl]acetamide	6191804	CC(=O)NCCC(c1ccccc1)Oc1ccc(cc1)C(F)(F)F			ChEMBLE_NTD	1	0.785714	0.892857
<i>N</i>-acetyl-5-methoxykynurenamine	1469359775			CHEMBL369941	Formyl-N-acetyl-5-methoxykynurenamine	1467911058	O=CNc1ccc(cc1C(=O)CCNC(=O)C)OC		C05642	CHEMBL1882218	1	0.761905	0.880952
Melatonin	1467881882		C01598,D08170	ChEMBLE_NTD,CHEMBL45	Formyl-N-acetyl-5-methoxykynurenamine	1467911058	O=CNc1ccc(cc1C(=O)CCNC(=O)C)OC		C05642	CHEMBL1882218	1	0.761905	0.880952
Quinolin-2-ol	1467917547		C06338,C06415	CHEMBL186422	N-(2-quinolyl)acetamide	2731024	CC(=O)Nc1ccc2c(n1)cccc2			ChEMBLE_NTD,CHEMBL188851	1	0.761905	0.880952
Colchicine	1467928119		C07592,D00570	ChEMBLE_NTD,CHEMBL107,CHEMBL330320,CHEMBL87	N-(1,2,3,10-tetramethoxy-9-oxo-6,8-dihydro-5H-benzo[a]heptalen-7-yl)acetamide	279338848	COC1=CC=C2C(=C(CCc3c2c(OC)c(c(c3)OC)OC)NC(=O)C)CC1=O			CHEMBL86600	1	0.747619	0.87381
N-(3-acetamido-4-oxo-1H-naphthalen-1-yl)acetamide	6295893			ChEMBLE_NTD	N-(4-acetylimino-1-oxo-2-naphthyl)acetamide	3380346	CC(=O)NC1=CC(=NC(=O)C)c2c(C1=O)cccc2			CHEMBL1970499	1	0.738095	0.869048
3-(2-acetamido-2-boronoethyl)benzoic acid	33880707	DB02614,EXPT00712		CHEMBL3577646	(1-acetamido-2-phenylethyl)boronic acid	122169547	OB(C(Cc1ccccc1)NC(=O)C)O			CHEMBL58706,CHEMBL61146	1	0.714286	0.857143
(Ac)2-L-Lys-D-Ala-D-Ala	1467895348		C03326	ChEMBLE_NTD,CHEMBL1160427,CHEMBL353896	(2R)-2-[[(2R)-2-[[(2S)-2-acetamido-6-amino-hexanoyl]amino]propanoyl]amino]propanoic acid	29761764	NCCCCC(C(=O)NC(C(=O)NC(C(=O)O)C)C)NC(=O)C			CHEMBL424767	1	0.714286	0.857143
N2-Acetyl-L-lysine	1467982462		C12989	CHEMBL1241437	(2R)-2-acetamido-6-amino-N-[(1S)-2-[(2-amino-2-oxo-ethyl)amino]-1-benzyl-2-oxo-ethyl]hexanamide	533319950	NCCCCC(C(=O)NC(C(=O)NCC(=O)N)Cc1ccccc1)NC(=O)C			CHEMBL2221219	1	0.714286	0.857143
(Ac)2-L-Lys-D-Ala	1467889174		C02487		(2S)-2-[[(2S)-2-acetamido-6-amino-hexanoyl]amino]propanoic acid	167727119	CC(=O)NC(C(=O)NC(C(=O)O)C)CCCCN			CHEMBL1814494	1	0.714286	0.857143
N2-Acetyl-L-lysine	1467982462		C12989	CHEMBL1241437	(2S)-2-[[(2S)-2-acetamido-6-amino-hexanoyl]amino]propanoic acid	167727119	CC(=O)NC(C(=O)NC(C(=O)O)C)CCCCN			CHEMBL1814494	1	0.714286	0.857143
N2-Acetyl-L-lysine	1467982462		C12989	CHEMBL1241437	(2S)-2-acetamido-6-amino-N-[(1S)-5-amino-1-(4-aminobutylcarbamoyl)pentyl]hexanamide	542865019	NCCCCNC(=O)C(NC(=O)C(NC(=O)C)CCCCN)CCCCN			CHEMBL2425346	1	0.714286	0.857143
N2-Acetyl-L-lysine	1467982462		C12989	CHEMBL1241437	(2S)-2-acetamido-6-amino-N-[(1S)-5-amino-1-(butylcarbamoyl)pentyl]hexanamide	542864997	NCCCCC(C(=O)NCCCC)NC(=O)C(NC(=O)C)CCCCN			CHEMBL2425344	1	0.714286	0.857143
N2-Acetyl-L-lysine	1467982462		C12989	CHEMBL1241437	(2S)-2-acetamido-6-amino-N-[(1S)-5-amino-1-(hydrazinecarbonyl)pentyl]hexanamide	545065624	NCCCCC(C(=O)NC(C(=O)NN)CCCCN)NC(=O)C			CHEMBL2425356	1	0.714286	0.857143
(3-Arylcarbonyl)-alanine	1467896130		C03450	CHEMBL2040644,CHEMBL315803	2-acetamido-4-oxo-4-phenylbutanoic acid	109022174	O=C(c1ccccc1)CC(C(=O)O)NC(=O)C			CHEMBL90740	1	0.714286	0.857143
alpha-Oxo-benzeneacetic acid	1467886510		C02137	ChEMBLE_NTD,CHEMBL950	2-acetamido-4-oxo-4-phenylbutanoic acid	109022174	O=C(c1ccccc1)CC(C(=O)O)NC(=O)C			CHEMBL90740	1	0.714286	0.857143
Benzoyl-CoA	1467871797		C00512		2-acetamido-4-oxo-4-phenylbutanoic acid	109022174	O=C(c1ccccc1)CC(C(=O)O)NC(=O)C			CHEMBL90740	1	0.714286	0.857143
N-Acetyl-L-aspartate	1467877141		C01042	ChEMBLE_NTD,CHEMBL1162493,CHEMBL1162494	2-acetamido-4-oxo-4-phenylbutanoic acid	109022174	O=C(c1ccccc1)CC(C(=O)O)NC(=O)C			CHEMBL90740	1	0.714286	0.857143
L-phenylalanine amide	1468073682	DB04029,EXPT02329		CHEMBL268713,CHEMBL350320	2-acetamido-6-amino-N-(2-amino-1-benzyl-2-oxo-ethyl)hexanamide	194590496	NCCCCC(C(=O)NC(C(=O)N)Cc1ccccc1)NC(=O)C			CHEMBL2221218	1	0.714286	0.857143
N2-Acetyl-L-lysine	1467982462		C12989	CHEMBL1241437	2-acetamido-6-amino-N-(2-amino-1-benzyl-2-oxo-ethyl)hexanamide	194590496	NCCCCC(C(=O)NC(C(=O)N)Cc1ccccc1)NC(=O)C			CHEMBL2221218	1	0.714286	0.857143
N2-Acetyl-L-lysine	1467982462		C12989	CHEMBL1241437	2-acetamido-6-amino-N-[(4-sulfamoylphenyl)methyl]hexanamide	1114264699	NCCCCC(C(=O)NCc1ccc(cc1)S(=O)(=O)N)NC(=O)C			CHEMBL3545492	1	0.714286	0.857143
N2-Acetyl-L-lysine	1467982462		C12989	CHEMBL1241437	2-acetamido-6-amino-N-[2-(4-sulfamoylphenyl)ethyl]hexanamide	1114264721	NCCCCC(C(=O)NCCc1ccc(cc1)S(=O)(=O)N)NC(=O)C			CHEMBL3545493	1	0.714286	0.857143
2-acetamido-N-benzyl-6-(benzylamino)hexanamide	4764828			ChEMBLE_NTD,CHEMBL1989116	2-acetamido-6-amino-N-benzyl-hexanamide	4764806	NCCCCC(C(=O)NCc1ccccc1)NC(=O)C			CHEMBL1985496	1	0.714286	0.857143
2-acetamido-N-benzyl-6-(propylamino)hexanamide	4764817			ChEMBLE_NTD,CHEMBL2002562	2-acetamido-6-amino-N-benzyl-hexanamide	4764806	NCCCCC(C(=O)NCc1ccccc1)NC(=O)C			CHEMBL1985496	1	0.714286	0.857143
benzyl N-[5-acetamido-6-(benzylamino)-6-oxo-hexyl]carbamate	4764762			ChEMBLE_NTD,CHEMBL1997699	2-acetamido-6-amino-N-benzyl-hexanamide	4764806	NCCCCC(C(=O)NCc1ccccc1)NC(=O)C			CHEMBL1985496	1	0.714286	0.857143
N2-Acetyl-L-lysine	1467982462		C12989	CHEMBL1241437	2-acetamido-6-amino-N-benzyl-hexanamide	4764806	NCCCCC(C(=O)NCc1ccccc1)NC(=O)C			CHEMBL1985496	1	0.714286	0.857143
N-(2-Phenylethyl)-acetamide	1467920877		C06746	CHEMBL99827	4-(2-acetamidoethyl)benzoic acid	4503804	CC(=O)NCCc1ccc(cc1)C(=O)O			CHEMBL441476	1	0.714286	0.857143
N-[2-(4-hydroxyphenyl)ethyl]acetamide	2338971			ChEMBLE_NTD,CHEMBL152117	4-(2-acetamidoethyl)benzoic acid	4503804	CC(=O)NCCc1ccc(cc1)C(=O)O			CHEMBL441476	1	0.714286	0.857143
4-Acetamidobutanoate	1467892516		C02946		4-acetamido-N-[1-(3,4-dichlorophenyl)cyclopropyl]butanamide	376070837	O=C(NC1(CC1)c1ccc(c(c1)Cl)Cl)CCCNC(=O)C			CHEMBL3466567	1	0.714286	0.857143
4-Acetamidobutanoyl-CoA	1467895565		C03357		4-acetamido-N-[1-(3,4-dichlorophenyl)cyclopropyl]butanamide	376070837	O=C(NC1(CC1)c1ccc(c(c1)Cl)Cl)CCCNC(=O)C			CHEMBL3466567	1	0.714286	0.857143
4-amino-N-[2-[4-[2-oxo-2-(6-oxo-5H-pyrido[2,3-b][1,4]benzodiazepin-11-yl)ethyl]piperazin-1-yl]ethyl]butanamide	6335647			ChEMBLE_NTD,CHEMBL302604	4-acetamido-N-[2-[4-[2-oxo-2-(6-oxo-5H-pyrido[2,3-b][1,4]benzodiazepin-11-yl)ethyl]piperazin-1-yl]ethyl]butanamide	127076377	O=C(CCCNC(=O)C)NCCN1CCN(CC1)CC(=O)n1c2ccccc2c(=O)[nH]c2c1nccc2			CHEMBL66177	1	0.714286	0.857143
4-Acetamidobutanoate	1467892516		C02946		4-acetamido-N-methyl-N-(4-pyrrolidin-1-ylbut-2-ynyl)butanamide	6685926	CC(=O)NCCCC(=O)N(CC#CCN1CCCC1)C			CHEMBL163995	1	0.714286	0.857143
4-Acetamidobutanoyl-CoA	1467895565		C03357		4-acetamido-N-methyl-N-(4-pyrrolidin-1-ylbut-2-ynyl)butanamide	6685926	CC(=O)NCCCC(=O)N(CC#CCN1CCCC1)C			CHEMBL163995	1	0.714286	0.857143
N-methyl-4-pyrrolidin-1-yl-but-2-yn-1-amine	6275886			ChEMBLE_NTD	4-acetamido-N-methyl-N-(4-pyrrolidin-1-ylbut-2-ynyl)butanamide	6685926	CC(=O)NCCCC(=O)N(CC#CCN1CCCC1)C			CHEMBL163995	1	0.714286	0.857143
N2-Acetyl-L-lysine	1467982462		C12989	CHEMBL1241437	5-[[(2S)-2-acetamido-6-amino-1-oxohexyl]amino]-4-oxopentanoic acid methyl ester	278002489	NCCCCC(C(=O)NCC(=O)CCC(=O)OC)NC(=O)C			CHEMBL485445	1	0.714286	0.857143
3-phenylprop-2-enenitrile	738560			ChEMBLE_NTD,CHEMBL2387747	N-(1-cyano-2-phenylethyl)acetamide	105605406	N#CC(Cc1ccccc1)NC(=O)C			CHEMBL13246	1	0.714286	0.857143
Amphetamine	1467927317		C07514,C07884,D03740	CHEMBL19393,CHEMBL405,CHEMBL612	N-(1-phenylpropan-2-yl)acetamide	269722	CC(Cc1ccccc1)NC(=O)C			CHEMBL1588171	1	0.714286	0.857143
N-[(1R,2S)-1-hydroxy-1-phenylpropan-2-yl]acetamide	2689389			ChEMBLE_NTD	N-(1-phenylpropan-2-yl)acetamide	269722	CC(Cc1ccccc1)NC(=O)C			CHEMBL1588171	1	0.714286	0.857143
N-[1-methyl-2-(o-tolyl)ethyl]acetamide	6331825			ChEMBLE_NTD	N-(1-phenylpropan-2-yl)acetamide	269722	CC(Cc1ccccc1)NC(=O)C			CHEMBL1588171	1	0.714286	0.857143
N-[1-methyl-2-(p-tolyl)ethyl]acetamide	6333050			ChEMBLE_NTD	N-(1-phenylpropan-2-yl)acetamide	269722	CC(Cc1ccccc1)NC(=O)C			CHEMBL1588171	1	0.714286	0.857143
N-methyl-N-(1-phenylpropan-2-yl)acetamide	6187527			ChEMBLE_NTD	N-(1-phenylpropan-2-yl)acetamide	269722	CC(Cc1ccccc1)NC(=O)C			CHEMBL1588171	1	0.714286	0.857143
Phenylacetone	1468002051		C15512		N-(1-phenylpropan-2-yl)acetamide	269722	CC(Cc1ccccc1)NC(=O)C			CHEMBL1588171	1	0.714286	0.857143
alpha-Oxo-benzeneacetic acid	1467886510		C02137	ChEMBLE_NTD,CHEMBL950	N-[(1R)-1-hydroxy-2-oxo-2-phenylethyl]acetamide	8491510	OC(C(=O)c1ccccc1)NC(=O)C			CHEMBL1733046	1	0.714286	0.857143
Aromatic aldehyde	1467868131		C00193,C00261,D02314	CHEMBL15972	N-[(1R)-1-hydroxy-2-oxo-2-phenylethyl]acetamide	8491510	OC(C(=O)c1ccccc1)NC(=O)C			CHEMBL1733046	1	0.714286	0.857143
PHENYLGLYOXAL	1469320193			ChEMBLE_NTD,CHEMBL233632	N-[(1R)-1-hydroxy-2-oxo-2-phenylethyl]acetamide	8491510	OC(C(=O)c1ccccc1)NC(=O)C			CHEMBL1733046	1	0.714286	0.857143
D-galacto-Hexodialdose	1467894982		C03269		N-[(3,4,5,6-tetrahydroxy-2-oxanyl)methyl]acetamide	4288698	CC(=O)NCC1OC(O)C(C(C1O)O)O			CHEMBL3245850	1	0.714286	0.857143
N-[2-(4-hydroxyphenyl)ethyl]acetamide	2338971			ChEMBLE_NTD,CHEMBL152117	N-[2-(4-morpholinosulfonylphenyl)ethyl]acetamide	7361755	CC(=O)NCCc1ccc(cc1)S(=O)(=O)N1CCOCC1			CHEMBL1523633	1	0.714286	0.857143
N-Acetylputrescine	1467890812		C02714	CHEMBL81241	N-[4-(propylamino)butyl]acetamide	125594947	CCCNCCCCNC(=O)C			CHEMBL176530	1	0.714286	0.857143
N4-Acetylaminobutanal	1467913450		C05936		N-[4-(propylamino)butyl]acetamide	125594947	CCCNCCCCNC(=O)C			CHEMBL176530	1	0.714286	0.857143
N2-Acetyl-L-lysine	1467982462		C12989	CHEMBL1241437	N-&alpha;-acetyl lysine methyl ester	1469299414	NCCCCC(C(=O)OC)NC(=O)C			ChEMBLE_NTD	1	0.714286	0.857143
1-(3-aminopropyl)-4-aminobutanal	1469377826			CHEMBL2261441	N8-Acetylspermidine	1467877028	NCCCNCCCCNC(=O)C		C01029	CHEMBL78630	1	0.714286	0.857143
N-Acetylputrescine	1467890812		C02714	CHEMBL81241	N8-Acetylspermidine	1467877028	NCCCNCCCCNC(=O)C		C01029	CHEMBL78630	1	0.714286	0.857143
N1,N8-Diacetylspermidine	1469317356			CHEMBL2008816	N8-Acetylspermidine	1467877028	NCCCNCCCCNC(=O)C		C01029	CHEMBL78630	1	0.714286	0.857143
N4-Acetylaminobutanal	1467913450		C05936		N8-Acetylspermidine	1467877028	NCCCNCCCCNC(=O)C		C01029	CHEMBL78630	1	0.714286	0.857143
Spermidine	1467869584		C00315	CHEMBL19612	N8-Acetylspermidine	1467877028	NCCCNCCCCNC(=O)C		C01029	CHEMBL78630	1	0.714286	0.857143
Citalopram aldehyde	1468012071		C16612		N-[3-[5-cyano-1-(4-fluorophenyl)-3H-isobenzofuran-1-yl]propyl]acetamide	6191749	N#Cc1ccc2c(c1)COC2(CCCNC(=O)C)c1ccc(cc1)F			ChEMBLE_NTD	1	0.711905	0.855952
Didemethylcitalopram	1468012043		C16609	CHEMBL3544716	N-[3-[5-cyano-1-(4-fluorophenyl)-3H-isobenzofuran-1-yl]propyl]acetamide	6191749	N#Cc1ccc2c(c1)COC2(CCCNC(=O)C)c1ccc(cc1)F			ChEMBLE_NTD	1	0.711905	0.855952
N-[3-[5-cyano-1-(4-fluorophenyl)-3H-isobenzofuran-1-yl]propyl]-N-methylacetamide	6191760			ChEMBLE_NTD	N-[3-[5-cyano-1-(4-fluorophenyl)-3H-isobenzofuran-1-yl]propyl]acetamide	6191749	N#Cc1ccc2c(c1)COC2(CCCNC(=O)C)c1ccc(cc1)F			ChEMBLE_NTD	1	0.711905	0.855952
(2-acetamido-3,4-diacetoxy-octadecyl) acetate	6298297			ChEMBLE_NTD	[(Z,2S,3S,4R)-2-acetamido-3,4-diacetoxy-octadec-9-enyl] acetate	112782251	CCCCCCCCC=CCCCCC(C(C(NC(=O)C)COC(=O)C)OC(=O)C)OC(=O)C			CHEMBL484428	1	0.690476	0.845238
3-Methylcrotonyl-CoA	1467893475		C03069		6-Hydroxymelatonin	1467911068	COc1cc2c(CCNC(=O)C)c[nH]c2cc1O		C05643	CHEMBL127421	1	0.690476	0.845238
Adenosine 3',5'-bisphosphate	1467866262	DB01812,EXPT00370	C00054	CHEMBL574817	6-Hydroxymelatonin	1467911068	COc1cc2c(CCNC(=O)C)c[nH]c2cc1O		C05643	CHEMBL127421	1	0.690476	0.845238
Melatonin	1467881882		C01598,D08170	ChEMBLE_NTD,CHEMBL45	6-Hydroxymelatonin	1467911068	COc1cc2c(CCNC(=O)C)c[nH]c2cc1O		C05643	CHEMBL127421	1	0.690476	0.845238
6-Hydroxymelatonin	1467911068		C05643	CHEMBL127421	Melatonin	1467881882	COc1ccc2c(c1)c(CCNC(=O)C)c[nH]2		C01598,D08170	ChEMBLE_NTD,CHEMBL45	1	0.690476	0.845238
Formyl-N-acetyl-5-methoxykynurenamine	1467911058		C05642	CHEMBL1882218	Melatonin	1467881882	COc1ccc2c(c1)c(CCNC(=O)C)c[nH]2		C01598,D08170	ChEMBLE_NTD,CHEMBL45	1	0.690476	0.845238
N-[2-(3-hydroxy-5-methoxy-2,3-dihydro-1H-indol-3-yl)ethyl]ethanimidic acid	1469255072				Melatonin	1467881882	COc1ccc2c(c1)c(CCNC(=O)C)c[nH]2		C01598,D08170	ChEMBLE_NTD,CHEMBL45	1	0.690476	0.845238
N-Acetylserotonin	1467876547		C00978	ChEMBLE MALARIA,CHEMBL33103	Melatonin	1467881882	COc1ccc2c(c1)c(CCNC(=O)C)c[nH]2		C01598,D08170	ChEMBLE_NTD,CHEMBL45	1	0.690476	0.845238
Shikimate 3-phosphate	1467894258	DB04328,EXPT02832	C03175	CHEMBL95193	Melatonin	1467881882	COc1ccc2c(c1)c(CCNC(=O)C)c[nH]2		C01598,D08170	ChEMBLE_NTD,CHEMBL45	1	0.690476	0.845238
N-(2-oxoethyl)acetamide	6295127			ChEMBLE_NTD	N-(2-indolin-3-ylethyl)acetamide	4977913	CC(=O)NCCC1CNc2c1cccc2			CHEMBL1994119	1	0.690476	0.845238
N-acetyltryptamine	1468190947			ChEMBLE MALARIA,CHEMBL33171	N-(2-indolin-3-ylethyl)acetamide	4977913	CC(=O)NCCC1CNc2c1cccc2			CHEMBL1994119	1	0.690476	0.845238
Quinoclamin	1468029544		C18584	CHEMBL156959	N-(3-chloro-1,4-dioxo-2-naphthyl)acetamide	720250	CC(=O)NC1=C(Cl)C(=O)c2c(C1=O)cccc2			CHEMBL153133	1	0.690476	0.845238
1-(2-ethoxyphenyl)propan-2-amine	6333116			ChEMBLE_NTD	N-[1-(2-ethoxyphenyl)propan-2-yl]acetamide	6333649	CCOc1ccccc1CC(NC(=O)C)C			ChEMBLE_NTD	1	0.690476	0.845238
N-[1-(2-methoxyphenyl)propan-2-yl]acetamide	6333369			ChEMBLE_NTD	N-[1-(2-ethoxyphenyl)propan-2-yl]acetamide	6333649	CCOc1ccccc1CC(NC(=O)C)C			ChEMBLE_NTD	1	0.690476	0.845238
N-[1-(2-propoxyphenyl)propan-2-yl]acetamide	6333945			ChEMBLE_NTD	N-[1-(2-ethoxyphenyl)propan-2-yl]acetamide	6333649	CCOc1ccccc1CC(NC(=O)C)C			ChEMBLE_NTD	1	0.690476	0.845238
N-[1-(2-ethoxyphenyl)propan-2-yl]acetamide	6333649			ChEMBLE_NTD	N-[1-(2-methoxyphenyl)propan-2-yl]acetamide	6333369	COc1ccccc1CC(NC(=O)C)C			ChEMBLE_NTD	1	0.690476	0.845238
Melatonin	1467881882		C01598,D08170	ChEMBLE_NTD,CHEMBL45	N-[2-(1-benzyl-5-methoxy-indol-3-yl)ethyl]acetamide	105694437	COc1ccc2c(c1)c(CCNC(=O)C)cn2Cc1ccccc1			CHEMBL34327	1	0.690476	0.845238
3,4-dimethoxyphenylethylamine	1468383301			ChEMBLE_NTD,CHEMBL26019	N-[2-(3,4-dimethoxyphenyl)ethyl]acetamide	1941735	COc1cc(CCNC(=O)C)ccc1OC			CHEMBL50311	1	0.690476	0.845238
N-Acetylserotonin	1467876547		C00978	ChEMBLE MALARIA,CHEMBL33103	N-[2-(5-bromo-1H-indol-3-yl)ethyl]acetamide	278985620	CC(=O)NCCc1c[nH]c2c1cc(Br)cc2			CHEMBL33800	1	0.690476	0.845238
N-acetyltryptamine	1468190947			ChEMBLE MALARIA,CHEMBL33171	N-[2-(5-bromo-1H-indol-3-yl)ethyl]acetamide	278985620	CC(=O)NCCc1c[nH]c2c1cc(Br)cc2			CHEMBL33800	1	0.690476	0.845238
6-Hydroxymelatonin	1467911068		C05643	CHEMBL127421	N-[2-(6-bromo-5-methoxy-1H-indol-3-yl)ethyl]acetamide	95048943	COc1cc2c(CCNC(=O)C)c[nH]c2cc1Br			CHEMBL123900	1	0.690476	0.845238
Melatonin	1467881882		C01598,D08170	ChEMBLE_NTD,CHEMBL45	N-[2-(6-bromo-5-methoxy-1H-indol-3-yl)ethyl]acetamide	95048943	COc1cc2c(CCNC(=O)C)c[nH]c2cc1Br			CHEMBL123900	1	0.690476	0.845238
6-Hydroxymelatonin	1467911068		C05643	CHEMBL127421	N-[2-(6-fluoro-5-methoxy-1H-indol-3-yl)ethyl]acetamide	439528	COc1cc2c(CCNC(=O)C)c[nH]c2cc1F			CHEMBL333886	1	0.690476	0.845238
Melatonin	1467881882		C01598,D08170	ChEMBLE_NTD,CHEMBL45	N-[2-(6-fluoro-5-methoxy-1H-indol-3-yl)ethyl]acetamide	439528	COc1cc2c(CCNC(=O)C)c[nH]c2cc1F			CHEMBL333886	1	0.690476	0.845238
N-[2-(1-acetyl-6-fluoro-5-methoxy-3-indolyl)ethyl]acetamide	6322037			ChEMBLE_NTD	N-[2-(6-fluoro-5-methoxy-1H-indol-3-yl)ethyl]acetamide	439528	COc1cc2c(CCNC(=O)C)c[nH]c2cc1F			CHEMBL333886	1	0.690476	0.845238
2-(4,5,6-trimethoxy-1H-indol-3-yl)ethanamine	219150			ChEMBLE_NTD	N-[2-(4,5,6-trimethoxy-1H-indol-3-yl)ethyl]acetamide	102340671	COc1c(OC)c(OC)cc2c1c(CCNC(=O)C)c[nH]2			CHEMBL30930	1	0.678571	0.839286
Melatonin	1467881882		C01598,D08170	ChEMBLE_NTD,CHEMBL45	3-(2-acetamidoethyl)-5-methoxy-1H-indole-2-carboxylic acid	6967500	COc1ccc2c(c1)c(CCNC(=O)C)c([nH]2)C(=O)O			CHEMBL1399821	1	0.666667	0.833333
N-[3-(aminomethyl)benzyl]acetamidine	1468363759	DB02044,EXPT00036		CHEMBL107251	N-[[3-(aminomethyl)phenyl]methyl]acetamide	131317038	NCc1cccc(c1)CNC(=O)C			CHEMBL7085	1	0.666667	0.833333
fingolimod	1468227452		D10001	CHEMBL314854	N-[1,1-bis(hydroxymethyl)-3-(4-octylphenyl)propyl]acetamide	102384111	CCCCCCCCc1ccc(cc1)CCC(NC(=O)C)(CO)CO			CHEMBL3323203	1	0.666667	0.833333
N-Acetyl-L-phenylalanine	1467896617		C03519,C05620	CHEMBL134570,CHEMBL174089,CHEMBL55743	(2R)-2-acetamido-N-[3-(2-oxo-1,3,4-oxathiazol-5-yl)phenyl]-3-phenylpropanamide	667215371	CC(=O)NC(C(=O)Nc1cccc(c1)c1nsc(=O)o1)Cc1ccccc1			CHEMBL3259881	1	0.642857	0.821429
N-Acetyl-L-phenylalanine	1467896617		C03519,C05620	CHEMBL134570,CHEMBL174089,CHEMBL55743	(2R)-2-acetamido-N-[4-(2-oxo-1,3,4-oxathiazol-5-yl)phenyl]-3-phenylpropanamide	622429044	CC(=O)NC(C(=O)Nc1ccc(cc1)c1nsc(=O)o1)Cc1ccccc1			CHEMBL3259880,CHEMBL3259882	1	0.642857	0.821429
N-Acetyl-L-phenylalanine	1467896617		C03519,C05620	CHEMBL134570,CHEMBL174089,CHEMBL55743	(2S)-1-[(2R)-2-acetamido-3-phenyl-propanoyl]-N-(4-guanidinobutyl)pyrrolidine-2-carboxamide	279695811	CC(=O)NC(C(=O)N1CCCC1C(=O)NCCCCN=C(N)N)Cc1ccccc1			CHEMBL146895	1	0.642857	0.821429
N-Acetyl-L-phenylalanine	1467896617		C03519,C05620	CHEMBL134570,CHEMBL174089,CHEMBL55743	(2S)-2-[[(2S)-2-acetamido-3-phenyl-propanoyl]amino]-N-[(1S)-1-formyl-4-guanidino-butyl]-3-methyl-butanamide	99492289	O=CC(NC(=O)C(C(C)C)NC(=O)C(Cc1ccccc1)NC(=O)C)CCCN=C(N)N			CHEMBL2373041	1	0.642857	0.821429
N-Acetyl-L-phenylalanine	1467896617		C03519,C05620	CHEMBL134570,CHEMBL174089,CHEMBL55743	(2S)-2-[[2-[[(2S)-2-acetamido-3-phenyl-propanoyl]amino]acetyl]amino]-3-methyl-butanoic acid	550454030	CC(C(C(=O)O)NC(=O)CNC(=O)C(Cc1ccccc1)NC(=O)C)C			CHEMBL2252866	1	0.642857	0.821429
N-Acetyl-L-phenylalanine	1467896617		C03519,C05620	CHEMBL134570,CHEMBL174089,CHEMBL55743	(2S)-2-acetamido-N-(2-amino-2-oxoethyl)-3-phenylpropanamide	2352601	O=C(C(Cc1ccccc1)NC(=O)C)NCC(=O)N			CHEMBL2369764	1	0.642857	0.821429
(2S)-2-acetamido-N-[(2S)-1-amino-1-oxo-3-[4-[(5S)-1,1,3-trioxo-1,2-thiazolidin-5-yl]phenyl]propan-2-yl]-3-phenylpropanamide	92781264	DB08003		CHEMBL2297013,CHEMBL373105,CHEMBL382311	(2S)-2-acetamido-N-[(2S)-1-amino-1-oxo-3-[4-(1,1,3-trioxo-5-isothiazolyl)phenyl]propan-2-yl]-3-phenylpropanamide	113648618	NC(=O)C(Cc1ccc(cc1)C1=CC(=O)NS1(=O)=O)NC(=O)C(Cc1ccccc1)NC(=O)C			CHEMBL193691	1	0.642857	0.821429
N-Acetyl-L-phenylalanine	1467896617		C03519,C05620	CHEMBL134570,CHEMBL174089,CHEMBL55743	(2S)-2-acetamido-N-[(E)-3-methylsulfonylallyl]-3-phenyl-propanamide	127471369	CC(=O)NC(C(=O)NCC=CS(=O)(=O)C)Cc1ccccc1			CHEMBL10747	1	0.642857	0.821429
N-Acetyl-L-phenylalanine	1467896617		C03519,C05620	CHEMBL134570,CHEMBL174089,CHEMBL55743	(4R)-4-[(2R)-2-acetamido-1-oxo-3-phenylpropoxy]-4-[(2R)-2-methyl-2-oxiranyl]-2-butenoic acid methyl ester	2407837	COC(=O)C=CC(C1(C)CO1)OC(=O)C(Cc1ccccc1)NC(=O)C			ChEMBLE_NTD	1	0.642857	0.821429
N-Acetyl-L-phenylalanine	1467896617		C03519,C05620	CHEMBL134570,CHEMBL174089,CHEMBL55743	(E)-4-[[(2S)-2-acetamido-1-oxo-3-phenylpropyl]amino]-2-butenoic acid methyl ester	127471336	COC(=O)C=CCNC(=O)C(Cc1ccccc1)NC(=O)C			CHEMBL11046,CHEMBL274617	1	0.642857	0.821429
N-Acetyl-L-phenylalanine	1467896617		C03519,C05620	CHEMBL134570,CHEMBL174089,CHEMBL55743	[(1R)-1-methylpropyl] (2S)-2-acetamido-3-phenyl-propanoate	667269032	CCC(OC(=O)C(Cc1ccccc1)NC(=O)C)C			CHEMBL3278793,CHEMBL3278817	1	0.642857	0.821429
N-Acetyl-L-phenylalanine	1467896617		C03519,C05620	CHEMBL134570,CHEMBL174089,CHEMBL55743	[(1S)-1-cyclohexylethyl] (2S)-2-acetamido-3-phenyl-propanoate	667269087	CC(C1CCCCC1)OC(=O)C(Cc1ccccc1)NC(=O)C			CHEMBL3278821,CHEMBL3278822	1	0.642857	0.821429
(3,4-diacetoxy-5-hydroxy-tetrahydrofuran-2-yl)methyl acetate	6301455			ChEMBLE_NTD	[(2R,3R,4R,5R)-5-(6-acetamido-4-oxo-5H-imidazo[4,5-c]pyridin-1-yl)-3,4-diacetoxy-tetrahydrofuran-2-yl]methyl acetate	348115702	CC(=O)OC1C(OC(=O)C)C(OC1n1cnc2c1cc(NC(=O)C)[nH]c2=O)COC(=O)C			CHEMBL3245966	1	0.642857	0.821429
(3,4-diacetoxy-5-oxo-tetrahydrofuran-2-yl)methyl acetate	6284789			ChEMBLE_NTD	[(2R,3R,4R,5R)-5-(6-acetamido-4-oxo-5H-imidazo[4,5-c]pyridin-1-yl)-3,4-diacetoxy-tetrahydrofuran-2-yl]methyl acetate	348115702	CC(=O)OC1C(OC(=O)C)C(OC1n1cnc2c1cc(NC(=O)C)[nH]c2=O)COC(=O)C			CHEMBL3245966	1	0.642857	0.821429
Quercetin	1467870413	DB04216,EXPT02732	C00389	ChEMBLE MALARIA,CHEMBL50	[2-(3,4-dihydroxyphenyl)-5,7-dihydroxy-4-oxo-chromen-3-yl] (2S)-2-acetamido-3-phenyl-propanoate	261222228	CC(=O)NC(C(=O)Oc1c(oc2c(c1=O)c(O)cc(c2)O)c1ccc(c(c1)O)O)Cc1ccccc1			CHEMBL549397	1	0.642857	0.821429
N-Acetyl-L-phenylalanine	1467896617		C03519,C05620	CHEMBL134570,CHEMBL174089,CHEMBL55743	[2-(4-fluorophenyl)-2-oxo-ethyl] (2S)-2-acetamido-3-phenyl-propanoate	22162321	CC(=O)NC(C(=O)OCC(=O)c1ccc(cc1)F)Cc1ccccc1			CHEMBL1350306	1	0.642857	0.821429
N-Acetyl-L-phenylalanine	1467896617		C03519,C05620	CHEMBL134570,CHEMBL174089,CHEMBL55743	[2-[(4-bromophenyl)carbamoyl]-4-chloro-phenyl] (2S)-2-acetamido-3-phenyl-propanoate	317164249	CC(=O)NC(C(=O)Oc1ccc(cc1C(=O)Nc1ccc(cc1)Br)Cl)Cc1ccccc1			CHEMBL1631149	1	0.642857	0.821429
N-Acetyl-L-phenylalanine	1467896617		C03519,C05620	CHEMBL134570,CHEMBL174089,CHEMBL55743	[2-[(4-bromophenyl)carbamoyl]-5-chloro-phenyl] (2S)-2-acetamido-3-phenyl-propanoate	317164260	CC(=O)NC(C(=O)Oc1cc(Cl)ccc1C(=O)Nc1ccc(cc1)Br)Cc1ccccc1			CHEMBL1631150	1	0.642857	0.821429
N-Acetyl-L-phenylalanine	1467896617		C03519,C05620	CHEMBL134570,CHEMBL174089,CHEMBL55743	[4-chloro-2-[(3-chlorophenyl)carbamoyl]phenyl] (2S)-2-acetamido-3-phenyl-propanoate	317161941	CC(=O)NC(C(=O)Oc1ccc(cc1C(=O)Nc1cccc(c1)Cl)Cl)Cc1ccccc1			CHEMBL1631145	1	0.642857	0.821429
N-Acetyl-L-phenylalanine	1467896617		C03519,C05620	CHEMBL134570,CHEMBL174089,CHEMBL55743	[4-chloro-2-[(4-chlorophenyl)carbamoyl]phenyl] (2S)-2-acetamido-3-phenyl-propanoate	317164227	CC(=O)NC(C(=O)Oc1ccc(cc1C(=O)Nc1ccc(cc1)Cl)Cl)Cc1ccccc1			CHEMBL1631147	1	0.642857	0.821429
N-Acetyl-L-phenylalanine	1467896617		C03519,C05620	CHEMBL134570,CHEMBL174089,CHEMBL55743	[5-chloro-2-[(3-chlorophenyl)carbamoyl]phenyl] (2S)-2-acetamido-3-phenyl-propanoate	317161952	CC(=O)NC(C(=O)Oc1cc(Cl)ccc1C(=O)Nc1cccc(c1)Cl)Cc1ccccc1			CHEMBL1631146	1	0.642857	0.821429
N-Acetyl-L-phenylalanine	1467896617		C03519,C05620	CHEMBL134570,CHEMBL174089,CHEMBL55743	[5-chloro-2-[(4-chlorophenyl)carbamoyl]phenyl] (2S)-2-acetamido-3-phenyl-propanoate	317164238	CC(=O)NC(C(=O)Oc1cc(Cl)ccc1C(=O)Nc1ccc(cc1)Cl)Cc1ccccc1			CHEMBL1631148	1	0.642857	0.821429
N-Acetyl-L-phenylalanine	1467896617		C03519,C05620	CHEMBL134570,CHEMBL174089,CHEMBL55743	2-(2-methoxyethoxy)ethyl 5-[[(2S)-2-acetamido-3-phenyl-propanoyl]amino]-4-oxo-pentanoate	278001830	COCCOCCOC(=O)CCC(=O)CNC(=O)C(Cc1ccccc1)NC(=O)C			CHEMBL486690	1	0.642857	0.821429
N-Acetyl-L-phenylalanine	1467896617		C03519,C05620	CHEMBL134570,CHEMBL174089,CHEMBL55743	2-[(2-acetamido-1-oxo-3-phenylpropyl)amino]-4-methylpentanoic acid methyl ester	45368861	COC(=O)C(NC(=O)C(Cc1ccccc1)NC(=O)C)CC(C)C			CHEMBL56749	1	0.642857	0.821429
N-Acetyl-L-phenylalanine	1467896617		C03519,C05620	CHEMBL134570,CHEMBL174089,CHEMBL55743	2-[(2S)-2-acetamido-3-phenyl-propanoyl]oxyacetic acid	118834180	O=C(C(Cc1ccccc1)NC(=O)C)OCC(=O)O			CHEMBL2207127	1	0.642857	0.821429
N-Acetyl-L-phenylalanine	1467896617		C03519,C05620	CHEMBL134570,CHEMBL174089,CHEMBL55743	2-acetamido-3-phenyl-N-(p-tolyl)propanamide	3458602	CC(=O)NC(C(=O)Nc1ccc(cc1)C)Cc1ccccc1			ChEMBLE_NTD	1	0.642857	0.821429
2-[acetyl-(2,2,2-trifluoro-1-oxoethyl)amino]-3-phenylpropanoic acid methyl ester	6314526			ChEMBLE_NTD	2-acetamido-3-phenylpropanoic acid methyl ester	2115114	COC(=O)C(Cc1ccccc1)NC(=O)C			CHEMBL3278790,CHEMBL445907,CHEMBL55547	1	0.642857	0.821429
2-acetamido-3-phenyl-2-propenoic acid methyl ester	4470179			ChEMBLE_NTD	2-acetamido-3-phenylpropanoic acid methyl ester	2115114	COC(=O)C(Cc1ccccc1)NC(=O)C			CHEMBL3278790,CHEMBL445907,CHEMBL55547	1	0.642857	0.821429
Methyl cinnamate	1467917070		C06358	CHEMBL3560502,CHEMBL55060	2-acetamido-3-phenylpropanoic acid methyl ester	2115114	COC(=O)C(Cc1ccccc1)NC(=O)C			CHEMBL3278790,CHEMBL445907,CHEMBL55547	1	0.642857	0.821429
methyl L-phenylalaninate	1468171307	DB06838		CHEMBL51969,CHEMBL53697	2-acetamido-3-phenylpropanoic acid methyl ester	2115114	COC(=O)C(Cc1ccccc1)NC(=O)C			CHEMBL3278790,CHEMBL445907,CHEMBL55547	1	0.642857	0.821429
N-Acetyl-L-phenylalanine	1467896617		C03519,C05620	CHEMBL134570,CHEMBL174089,CHEMBL55743	2-acetamido-3-phenylpropanoic acid methyl ester	2115114	COC(=O)C(Cc1ccccc1)NC(=O)C			CHEMBL3278790,CHEMBL445907,CHEMBL55547	1	0.642857	0.821429
<i>N</i>-acetyl-5-methoxykynurenamine	1469359775			CHEMBL369941	2-acetamido-4-(2-amino-5-methoxyphenyl)-4-oxobutanoic acid	96701453	COc1ccc(c(c1)C(=O)CC(C(=O)O)NC(=O)C)N			CHEMBL330466	1	0.642857	0.821429
L-tyrosinamide	1468073698	DB03380,EXPT03135			2-acetamido-N-[1-amino-3-(4-hydroxyphenyl)-1-oxopropan-2-yl]-3-phenylpropanamide	34466089	CC(=O)NC(C(=O)NC(C(=O)N)Cc1ccc(cc1)O)Cc1ccccc1			CHEMBL210784	1	0.642857	0.821429
N-Acetyl-L-phenylalanine	1467896617		C03519,C05620	CHEMBL134570,CHEMBL174089,CHEMBL55743	2-acetamido-N-[1-amino-3-(4-hydroxyphenyl)-1-oxopropan-2-yl]-3-phenylpropanamide	34466089	CC(=O)NC(C(=O)NC(C(=O)N)Cc1ccc(cc1)O)Cc1ccccc1			CHEMBL210784	1	0.642857	0.821429
N-Acetyl-L-phenylalanine	1467896617		C03519,C05620	CHEMBL134570,CHEMBL174089,CHEMBL55743	2-acetamido-N-allyl-3-phenyl-propanamide	125389844	C=CCNC(=O)C(Cc1ccccc1)NC(=O)C			CHEMBL12734	1	0.642857	0.821429
3-Oxo-3-phenylpropanoate	1467923905		C07114	CHEMBL3251041,CHEMBL3546292	3-acetamido-3-phenyl-2-propenoic acid	26600104	CC(=O)NC(=CC(=O)O)c1ccccc1			CHEMBL1771758	1	0.642857	0.821429
Histamine	1467870398	APRD01015,DB00667,DB05381,DB05891,DB11320	C00388,D08040	CHEMBL90	4-(beta-Acetylaminoethyl)imidazole	1467907239	CC(=O)NCCc1c[nH]cn1	DB04622	C05135	CHEMBL1230893	1	0.642857	0.821429
Imidazole-4-acetaldehyde	1467907204		C05130		4-(beta-Acetylaminoethyl)imidazole	1467907239	CC(=O)NCCc1c[nH]cn1	DB04622	C05135	CHEMBL1230893	1	0.642857	0.821429
N-Acetyl-L-histidine	1467892899		C02997	CHEMBL1387086,CHEMBL3251664	4-(beta-Acetylaminoethyl)imidazole	1467907239	CC(=O)NCCc1c[nH]cn1	DB04622	C05135	CHEMBL1230893	1	0.642857	0.821429
N-Acetyl-L-phenylalanine	1467896617		C03519,C05620	CHEMBL134570,CHEMBL174089,CHEMBL55743	5-[[(2S)-2-acetamido-1-oxo-3-phenylpropyl]amino]-4-oxopentanoic acid methyl ester	119053146	COC(=O)CCC(=O)CNC(=O)C(Cc1ccccc1)NC(=O)C			CHEMBL483887,CHEMBL485313	1	0.642857	0.821429
N-Acetyl-L-phenylalanine	1467896617		C03519,C05620	CHEMBL134570,CHEMBL174089,CHEMBL55743	benzyl N-[[(2S)-2-acetamido-3-phenyl-propanoyl]amino]carbamate	116048269	O=C(NNC(=O)C(Cc1ccccc1)NC(=O)C)OCc1ccccc1			CHEMBL25793	1	0.642857	0.821429
Ac-Tyr-OEt	1467882361		C01657	ChEMBLE_NTD,CHEMBL1354672,CHEMBL3278820,CHEMBL57662	ethyl (2S)-2-acetamido-3-phenyl-propanoate	2079392	CCOC(=O)C(Cc1ccccc1)NC(=O)C			CHEMBL165447,CHEMBL294389	1	0.642857	0.821429
Ethyl cinnamate	1467917082		C06359	CHEMBL318196,CHEMBL3182745	ethyl (2S)-2-acetamido-3-phenyl-propanoate	2079392	CCOC(=O)C(Cc1ccccc1)NC(=O)C			CHEMBL165447,CHEMBL294389	1	0.642857	0.821429
N-Acetyl-L-phenylalanine	1467896617		C03519,C05620	CHEMBL134570,CHEMBL174089,CHEMBL55743	ethyl (2S)-2-acetamido-3-phenyl-propanoate	2079392	CCOC(=O)C(Cc1ccccc1)NC(=O)C			CHEMBL165447,CHEMBL294389	1	0.642857	0.821429
N-Acetyl-D-mannosamine	1468065130		C00645	CHEMBL3182062	N-(1-formyl-3,4,5-trihydroxy-pentyl)acetamide	6284212	O=CC(CC(C(CO)O)O)NC(=O)C			ChEMBLE_NTD	1	0.642857	0.821429
4-Hydroxy-2,6-dimethylaniline	1468011686		C16570		N-(4-hydroxy-2,6-dimethylphenyl)acetamide	1943329	CC(=O)Nc1c(C)cc(cc1C)O			CHEMBL15679	1	0.642857	0.821429
(+)-Norephedrine	1467888153		C02343,C07911,C08300,C16719,D07627	ChEMBLE_NTD,CHEMBL136560,CHEMBL1412041,CHEMBL1574804,CHEMBL1616525,CHEMBL1788114,CHEMBL2092846,CHEMBL61006	N-[(1R,2S)-1-hydroxy-1-phenylpropan-2-yl]acetamide	2689389	OC(c1ccccc1)C(NC(=O)C)C			ChEMBLE_NTD	1	0.642857	0.821429
N(gamma)-Acetyldiaminobutyrate	1467917868		C06442	ChEMBLE_NTD	N-[(3S)-3-amino-4-oxo-4-(1-piperidyl)butyl]acetamide	100576382	NC(C(=O)N1CCCCC1)CCNC(=O)C			CHEMBL440325	1	0.642857	0.821429
N-Acetyl-L-phenylalanine	1467896617		C03519,C05620	CHEMBL134570,CHEMBL174089,CHEMBL55743	N-[1-benzyl-2-[4-(ethylcarbamothioyl)piperazin-1-yl]-2-oxo-ethyl]acetamide	31265362	CCNC(=S)N1CCN(CC1)C(=O)C(Cc1ccccc1)NC(=O)C			CHEMBL1491424	1	0.642857	0.821429
N-Acetyl-L-phenylalanine	1467896617		C03519,C05620	CHEMBL134570,CHEMBL174089,CHEMBL55743	N-[1-benzyl-2-[4-(furan-2-carbonyl)piperazin-1-yl]-2-oxo-ethyl]acetamide	7334783	CC(=O)NC(C(=O)N1CCN(CC1)C(=O)c1ccco1)Cc1ccccc1			CHEMBL1311057	1	0.642857	0.821429
N-Acetyl-L-phenylalanine	1467896617		C03519,C05620	CHEMBL134570,CHEMBL174089,CHEMBL55743	N-[1-benzyl-2-[4-(isobutylcarbamothioyl)piperazin-1-yl]-2-oxo-ethyl]acetamide	31265373	CC(CNC(=S)N1CCN(CC1)C(=O)C(Cc1ccccc1)NC(=O)C)C			CHEMBL1410846	1	0.642857	0.821429
4-(beta-Acetylaminoethyl)imidazole	1467907239	DB04622	C05135	CHEMBL1230893	N-[2-[(5S)-4,5-dihydro-1H-imidazol-5-yl]ethyl]acetamide	281788281	CC(=O)NCCC1CN=CN1			CHEMBL1186848	1	0.642857	0.821429
Aromatic aldehyde	1467868131		C00193,C00261,D02314	CHEMBL15972	N-benzylacetamide	118890	CC(=O)NCc1ccccc1			CHEMBL1632555	1	0.642857	0.821429
Benzylamine	1468002529	DB02464,EXPT00400	C15562	CHEMBL522	N-benzylacetamide	118890	CC(=O)NCc1ccccc1			CHEMBL1632555	1	0.642857	0.821429
N-[(4-chlorophenyl)methyl]acetamide	421783			ChEMBLE_NTD	N-benzylacetamide	118890	CC(=O)NCc1ccccc1			CHEMBL1632555	1	0.642857	0.821429
N,N-dimethyl-N'-(phenylmethyl)ethanimidamide	6175117			ChEMBLE_NTD	N-benzylacetamide	118890	CC(=O)NCc1ccccc1			CHEMBL1632555	1	0.642857	0.821429
N-Acetyl-L-phenylalanine	1467896617		C03519,C05620	CHEMBL134570,CHEMBL174089,CHEMBL55743	phenacyl (2S)-2-acetamido-3-phenyl-propanoate	22183284	CC(=O)NC(C(=O)OCC(=O)c1ccccc1)Cc1ccccc1			CHEMBL1501216	1	0.642857	0.821429
4-(aminomethyl)benzoic acid	647431		D07568	CHEMBL328875	4-(acetamidomethyl)benzoic acid	5993906	CC(=O)NCc1ccc(cc1)C(=O)O			CHEMBL274499	1	0.630952	0.815476
TAK-375	1468611310	APRD01213,DB00980	D02689	ChEMBLE_NTD,CHEMBL1218,CHEMBL133775,CHEMBL134330	N-[2-[(8S)-2,6,7,8-tetrahydro-1H-cyclopenta[e]benzofuran-8-yl]ethyl]acetamide	94567722	CC(=O)NCCC1CCc2c1c1CCOc1cc2			CHEMBL134102	1	0.62381	0.811905
[2-(diacetylamino)cyclohexyl] acetate	6291143			ChEMBLE_NTD	[(1S,2S)-2-acetamidocyclohexyl] acetate	5022782	CC(=O)NC1CCCCC1OC(=O)C			CHEMBL2005798	1	0.619048	0.809524
[4-[1-acetoxy-2-[acetyl(methyl)amino]ethyl]-2-methoxy-phenyl] acetate	6277405			ChEMBLE_NTD	[4-(2-acetamido-1-acetoxy-ethyl)-2-methoxy-phenyl] acetate	6313395	COc1cc(ccc1OC(=O)C)C(OC(=O)C)CNC(=O)C			ChEMBLE_NTD	1	0.619048	0.809524
2-Fluoroaniline	1467966089		C11010	CHEMBL195328	N-(2-fluorophenyl)acetamide	671545	CC(=O)Nc1ccccc1F			CHEMBL121805	1	0.619048	0.809524
Acetanilide	1467927844		C07565	ChEMBLE_NTD,CHEMBL269644	N-(2-fluorophenyl)acetamide	671545	CC(=O)Nc1ccccc1F			CHEMBL121805	1	0.619048	0.809524
(2-acetamidophenyl) 4-bromobenzoate	6316920			ChEMBLE_NTD	N-(2-hydroxyphenyl)acetamide	123929	CC(=O)Nc1ccccc1O			CHEMBL1456301	1	0.619048	0.809524
Acetanilide	1467927844		C07565	ChEMBLE_NTD,CHEMBL269644	N-(2-hydroxyphenyl)acetamide	123929	CC(=O)Nc1ccccc1O			CHEMBL1456301	1	0.619048	0.809524
N-Acetylanthranilate	1467916771		C06332		N-(2-hydroxyphenyl)acetamide	123929	CC(=O)Nc1ccccc1O			CHEMBL1456301	1	0.619048	0.809524
o-Chloroacetanilide	1467993096		C14619		N-(2-hydroxyphenyl)acetamide	123929	CC(=O)Nc1ccccc1O			CHEMBL1456301	1	0.619048	0.809524
ortho-Anisidine	1468035070		C19191	CHEMBL1612004	N-(2-methoxyphenyl)acetamide	74369	COc1ccccc1NC(=O)C			CHEMBL1880779	1	0.619048	0.809524
2-acetamido-4,5,6,7-tetrahydrobenzothiophene-3-carboxylic acid	6320219			ChEMBLE_NTD	N-(3-cyano-4,5,6,7-tetrahydrobenzothiophen-2-yl)acetamide	3976470	N#Cc1c(NC(=O)C)sc2c1CCCC2			ChEMBLE_NTD,CHEMBL1412798	1	0.619048	0.809524
N-[3-[4-[4-(cyclohexylmethylsulfonylamino)butyl]piperazin-1-yl]phenyl]acetamide	112161132	DB05562	D09358	CHEMBL209821	N-[3-[4-[4-[cyclohexylmethylsulfonyl(methyl)amino]butyl]piperazin-1-yl]phenyl]acetamide	113101857	CC(=O)Nc1cccc(c1)N1CCN(CC1)CCCCN(S(=O)(=O)CC1CCCCC1)C			CHEMBL207220	1	0.619048	0.809524
3-acetamido-2-(3-amino-1,2-dihydroxypropyl)-4-hydroxy-3,4-dihydro-2H-pyran-6-carboxylic acid	20360	DB04227,EXPT00352		CHEMBL140830	(2R,3R,4S)-3-acetamido-2-[(1S,2S)-1,2-dihydroxy-3-(2-methylpropanoylamino)propyl]-4-hydroxy-3,4-dihydro-2H-pyran-6-carboxylic acid	280496563	CC(=O)NC1C(O)C=C(OC1C(C(CNC(=O)C(C)C)O)O)C(=O)O			CHEMBL252063	1	0.607143	0.803571
3-acetamido-2-(3-amino-1,2-dihydroxypropyl)-4-hydroxy-3,4-dihydro-2H-pyran-6-carboxylic acid	20360	DB04227,EXPT00352		CHEMBL140830	(2R,3R,4S)-3-acetamido-2-[(1S,2S)-1,2-dihydroxy-3-(3-methylpentanoylamino)propyl]-4-hydroxy-3,4-dihydro-2H-pyran-6-carboxylic acid	280496596	CCC(CC(=O)NCC(C(C1OC(=CC(C1NC(=O)C)O)C(=O)O)O)O)C			CHEMBL403931	1	0.607143	0.803571
3-acetamido-2-(3-amino-1,2-dihydroxypropyl)-4-hydroxy-3,4-dihydro-2H-pyran-6-carboxylic acid	20360	DB04227,EXPT00352		CHEMBL140830	(2R,3R,4S)-3-acetamido-2-[(1S,2S)-1,2-dihydroxy-3-(pentanoylamino)propyl]-4-hydroxy-3,4-dihydro-2H-pyran-6-carboxylic acid	280496574	CCCCC(=O)NCC(C(C1OC(=CC(C1NC(=O)C)O)C(=O)O)O)O			CHEMBL252264	1	0.607143	0.803571
3-acetamido-2-(3-amino-1,2-dihydroxypropyl)-4-hydroxy-3,4-dihydro-2H-pyran-6-carboxylic acid	20360	DB04227,EXPT00352		CHEMBL140830	(2R,3R,4S)-3-acetamido-2-[(1S,2S)-3-(2,2-dimethylpropanoylamino)-1,2-dihydroxy-propyl]-4-hydroxy-3,4-dihydro-2H-pyran-6-carboxylic acid	280496585	CC(=O)NC1C(O)C=C(OC1C(C(CNC(=O)C(C)(C)C)O)O)C(=O)O			CHEMBL252265	1	0.607143	0.803571
3-acetamido-2-(3-amino-1,2-dihydroxypropyl)-4-hydroxy-3,4-dihydro-2H-pyran-6-carboxylic acid	20360	DB04227,EXPT00352		CHEMBL140830	(2R,3R,4S)-3-acetamido-2-[(1S,2S)-3-(cyclopropanecarbonylamino)-1,2-dihydroxy-propyl]-4-hydroxy-3,4-dihydro-2H-pyran-6-carboxylic acid	280496530	CC(=O)NC1C(O)C=C(OC1C(C(CNC(=O)C1CC1)O)O)C(=O)O			CHEMBL253684	1	0.607143	0.803571
3-acetamido-2-(3-amino-1,2-dihydroxypropyl)-4-hydroxy-3,4-dihydro-2H-pyran-6-carboxylic acid	20360	DB04227,EXPT00352		CHEMBL140830	(2R,4S)-3-acetamido-2-[(1S,2S)-3-benzamido-1,2-dihydroxypropyl]-4-hydroxy-3,4-dihydro-2H-pyran-6-carboxylate	212048454	CC(=O)NC1C(O)C=C(OC1C(C(CNC(=O)c1ccccc1)O)O)C(=O)[O-]			CHEMBL1289198,CHEMBL253682	1	0.607143	0.803571
N-Acetylanthranilate	1467916771		C06332		(2-fluorophenyl)methyl 2-acetamidobenzoate	13346062	CC(=O)Nc1ccccc1C(=O)OCc1ccccc1F			CHEMBL1413145	1	0.595238	0.797619
N-Acetyl-D-tryptophan	1467893972		C03137	ChEMBLE_NTD,CHEMBL1905494,CHEMBL291829,CHEMBL54170	(2S)-2-[[(2S)-2-acetamido-3-(1H-indol-3-yl)propanoyl]amino]-N-(2-amino-2-oxo-ethyl)-3-phenyl-propanamide	533356965	CC(=O)NC(C(=O)NC(C(=O)NCC(=O)N)Cc1ccccc1)Cc1c[nH]c2c1cccc2			CHEMBL2178724,CHEMBL2178733	1	0.595238	0.797619
N-ACETYL-TRYPTOPHANAMIDE	1469402043			ChEMBLE_NTD,CHEMBL3186358,CHEMBL390937	(2S)-2-[[(2S)-2-acetamido-3-(1H-indol-3-yl)propanoyl]amino]-N-(2-amino-2-oxo-ethyl)-3-phenyl-propanamide	533356965	CC(=O)NC(C(=O)NC(C(=O)NCC(=O)N)Cc1ccccc1)Cc1c[nH]c2c1cccc2			CHEMBL2178724,CHEMBL2178733	1	0.595238	0.797619
N-Acetyl-D-tryptophan	1467893972		C03137	ChEMBLE_NTD,CHEMBL1905494,CHEMBL291829,CHEMBL54170	(2S)-2-acetamido-3-(1H-indol-3-yl)-N-[(1R)-tetralin-1-yl]propanamide	77022562	CC(=O)NC(C(=O)NC1CCCc2c1cccc2)Cc1c[nH]c2c1cccc2			CHEMBL1874755	1	0.595238	0.797619
N-ACETYL-TRYPTOPHANAMIDE	1469402043			ChEMBLE_NTD,CHEMBL3186358,CHEMBL390937	(2S)-2-acetamido-3-(1H-indol-3-yl)-N-[(1R)-tetralin-1-yl]propanamide	77022562	CC(=O)NC(C(=O)NC1CCCc2c1cccc2)Cc1c[nH]c2c1cccc2			CHEMBL1874755	1	0.595238	0.797619
N-Acetyl-D-tryptophan	1467893972		C03137	ChEMBLE_NTD,CHEMBL1905494,CHEMBL291829,CHEMBL54170	(2S)-2-acetamido-3-(1H-indol-3-yl)-N-[2-(2-pyridyl)ethyl]propanamide	25497227	CC(=O)NC(C(=O)NCCc1ccccn1)Cc1c[nH]c2c1cccc2			CHEMBL1724483	1	0.595238	0.797619
N-ACETYL-TRYPTOPHANAMIDE	1469402043			ChEMBLE_NTD,CHEMBL3186358,CHEMBL390937	(2S)-2-acetamido-3-(1H-indol-3-yl)-N-[2-(2-pyridyl)ethyl]propanamide	25497227	CC(=O)NC(C(=O)NCCc1ccccn1)Cc1c[nH]c2c1cccc2			CHEMBL1724483	1	0.595238	0.797619
N-Acetyl-D-tryptophan	1467893972		C03137	ChEMBLE_NTD,CHEMBL1905494,CHEMBL291829,CHEMBL54170	(2S)-2-acetamido-N-benzyl-3-(1H-indol-3-yl)propanamide	23223589	CC(=O)NC(C(=O)NCc1ccccc1)Cc1c[nH]c2c1cccc2			CHEMBL1902699	1	0.595238	0.797619
N-ACETYL-TRYPTOPHANAMIDE	1469402043			ChEMBLE_NTD,CHEMBL3186358,CHEMBL390937	(2S)-2-acetamido-N-benzyl-3-(1H-indol-3-yl)propanamide	23223589	CC(=O)NC(C(=O)NCc1ccccc1)Cc1c[nH]c2c1cccc2			CHEMBL1902699	1	0.595238	0.797619
N-Acetyl-D-tryptophan	1467893972		C03137	ChEMBLE_NTD,CHEMBL1905494,CHEMBL291829,CHEMBL54170	(2S)-2-acetamido-N-cyclopropyl-3-(1H-indol-3-yl)propanamide	8108476	CC(=O)NC(C(=O)NC1CC1)Cc1c[nH]c2c1cccc2			CHEMBL1576878	1	0.595238	0.797619
N-Acetylanthranilate	1467916771		C06332		(3-fluorophenyl)methyl 2-acetamidobenzoate	21606375	CC(=O)Nc1ccccc1C(=O)OCc1cccc(c1)F			CHEMBL1500499	1	0.595238	0.797619
N-Acetyl-D-tryptophan	1467893972		C03137	ChEMBLE_NTD,CHEMBL1905494,CHEMBL291829,CHEMBL54170	(4-cyanophenyl)methyl (2S)-2-acetamido-3-(1H-indol-3-yl)propanoate	23994798	N#Cc1ccc(cc1)COC(=O)C(Cc1c[nH]c2c1cccc2)NC(=O)C			CHEMBL1878080	1	0.595238	0.797619
Caffeate	1467878631	DB01880,EXPT01188	C01197,C01481	ChEMBLE_NTD,CHEMBL1320034,CHEMBL145,CHEMBL3181904	(E)-N-(3-acetamido-4-hydroxyphenyl)-3-(3,4-dihydroxyphenyl)-2-propenamide	535494251	O=C(Nc1ccc(c(c1)NC(=O)C)O)C=Cc1ccc(c(c1)O)O			CHEMBL2392256	1	0.595238	0.797619
Caffeoyl-CoA	1467869667		C00323		(E)-N-(3-acetamido-4-hydroxyphenyl)-3-(3,4-dihydroxyphenyl)-2-propenamide	535494251	O=C(Nc1ccc(c(c1)NC(=O)C)O)C=Cc1ccc(c(c1)O)O			CHEMBL2392256	1	0.595238	0.797619
Betulin	1467936896		C08618	ChEMBLE_NTD,CHEMBL140040,CHEMBL1610940,CHEMBL2069124,CHEMBL23236	[(1R,3aS,5aR,5bR,7aR,9S,11aR,11bR,13aR,13bR)-9-hydroxy-1-isopropenyl-5a,5b,8,8,11a-pentamethyl-1,2,3,4,5,6,7,7a,9,10,11,11b,12,13,13a,13b-hexadecahydrocyclopenta[a]chrysen-3a-yl]methyl 2-acetamidobenzoate	197771749	CC(=O)Nc1ccccc1C(=O)OCC12CCC(C2C2C(CC1)(C)C1(C)CCC3C(C1CC2)(C)CCC(C3(C)C)O)C(=C)C			CHEMBL1076490	1	0.595238	0.797619
N-Acetyl-D-tryptophan	1467893972		C03137	ChEMBLE_NTD,CHEMBL1905494,CHEMBL291829,CHEMBL54170	[2-(1,3-benzodioxol-5-ylamino)-2-oxo-ethyl] (2S)-2-acetamido-3-(1H-indol-3-yl)propanoate	20598423	O=C(Nc1ccc2c(c1)OCO2)COC(=O)C(Cc1c[nH]c2c1cccc2)NC(=O)C			CHEMBL1349798,CHEMBL1734104	1	0.595238	0.797619
N-Acetylanthranilate	1467916771		C06332		[2-(2-chlorophenyl)-2-oxo-ethyl] 2-acetamidobenzoate	20192083	CC(=O)Nc1ccccc1C(=O)OCC(=O)c1ccccc1Cl			CHEMBL1312272	1	0.595238	0.797619
N-Acetylanthranilate	1467916771		C06332		[2-oxo-2-(pyrimidin-2-ylamino)ethyl] 2-acetamidobenzoate	61219357	O=C(Nc1ncccn1)COC(=O)c1ccccc1NC(=O)C			CHEMBL1731215	1	0.595238	0.797619
N-Acetyl-D-tryptophan	1467893972		C03137	ChEMBLE_NTD,CHEMBL1905494,CHEMBL291829,CHEMBL54170	[3,5-bis(trifluoromethyl)phenyl]methyl (2S)-2-acetamido-3-(1H-indol-3-yl)propanoate	2444650	CC(=O)NC(C(=O)OCc1cc(cc(c1)C(F)(F)F)C(F)(F)F)Cc1c[nH]c2c1cccc2			CHEMBL188166,CHEMBL22870	1	0.595238	0.797619
N-Acetylanthranilate	1467916771		C06332		1-[(2-acetamidophenyl)-oxomethyl]-4-piperidinecarboxylic acid methyl ester	8753674	COC(=O)C1CCN(CC1)C(=O)c1ccccc1NC(=O)C			CHEMBL1348081	1	0.595238	0.797619
N-Acetyl-D-tryptophan	1467893972		C03137	ChEMBLE_NTD,CHEMBL1905494,CHEMBL291829,CHEMBL54170	2-[[2-acetamido-3-(1H-indol-3-yl)propanoyl]amino]-3-methyl-butanamide	194592465	CC(=O)NC(C(=O)NC(C(=O)N)C(C)C)Cc1c[nH]c2c1cccc2			CHEMBL227174,CHEMBL227338	1	0.595238	0.797619
N-ACETYL-TRYPTOPHANAMIDE	1469402043			ChEMBLE_NTD,CHEMBL3186358,CHEMBL390937	2-[[2-acetamido-3-(1H-indol-3-yl)propanoyl]amino]-3-methyl-butanamide	194592465	CC(=O)NC(C(=O)NC(C(=O)N)C(C)C)Cc1c[nH]c2c1cccc2			CHEMBL227174,CHEMBL227338	1	0.595238	0.797619
Lappaconitine	1467937820		C08694	CHEMBL1592229,CHEMBL2112849,CHEMBL2296176,CHEMBL2373719,CHEMBL2373762,CHEMBL3348965	2-[4,7-bis(carboxylatomethyl)-10-(carboxymethyl)-1,4,7,10-tetrazacyclododec-1-yl]acetate; gadolinium(3+)	2694407	CCN1CC2(CCC(C34C1C(O)(CC23)C1(C2(C4CC(C2OC)C(C1)OC)O)O)OC)OC(=O)c1ccccc1NC(=O)C			ChEMBLE_NTD	1	0.595238	0.797619
N-Acetyl-D-tryptophan	1467893972		C03137	ChEMBLE_NTD,CHEMBL1905494,CHEMBL291829,CHEMBL54170	2-acetamido-3-(1H-indol-3-yl)-N-[2-(4-methoxyphenoxy)ethyl]propanamide	48908993	COc1ccc(cc1)OCCNC(=O)C(Cc1c[nH]c2c1cccc2)NC(=O)C			CHEMBL1867042	1	0.595238	0.797619
N-ACETYL-TRYPTOPHANAMIDE	1469402043			ChEMBLE_NTD,CHEMBL3186358,CHEMBL390937	2-acetamido-3-(1H-indol-3-yl)-N-[2-(4-methoxyphenoxy)ethyl]propanamide	48908993	COc1ccc(cc1)OCCNC(=O)C(Cc1c[nH]c2c1cccc2)NC(=O)C			CHEMBL1867042	1	0.595238	0.797619
N-Acetyl-D-tryptophan	1467893972		C03137	ChEMBLE_NTD,CHEMBL1905494,CHEMBL291829,CHEMBL54170	2-acetamido-3-(1H-indol-3-yl)-N-[2-(4-sulfamoylphenyl)ethyl]propanamide	48156619	CC(=O)NC(C(=O)NCCc1ccc(cc1)S(=O)(=O)N)Cc1c[nH]c2c1cccc2			CHEMBL1446119	1	0.595238	0.797619
N-ACETYL-TRYPTOPHANAMIDE	1469402043			ChEMBLE_NTD,CHEMBL3186358,CHEMBL390937	2-acetamido-3-(1H-indol-3-yl)-N-[2-(4-sulfamoylphenyl)ethyl]propanamide	48156619	CC(=O)NC(C(=O)NCCc1ccc(cc1)S(=O)(=O)N)Cc1c[nH]c2c1cccc2			CHEMBL1446119	1	0.595238	0.797619
2-acetamido-4,5,6,7-tetrahydrobenzothiophene-3-carboxylic acid	6320219			ChEMBLE_NTD	2-acetamido-4,5,6,7-tetrahydro-1-benzothiophene-3-carboxylic acid methyl ester	7328714	COC(=O)c1c(NC(=O)C)sc2c1CCCC2			CHEMBL1459483	1	0.595238	0.797619
2-acetamido-4,5,6,7-tetrahydrobenzothiophene-3-carboxylic acid	6320219			ChEMBLE_NTD	2-acetamido-N-ethyl-4,5,6,7-tetrahydrobenzothiophene-3-carboxamide	11966270	CCNC(=O)c1c(NC(=O)C)sc2c1CCCC2			CHEMBL1470247	1	0.595238	0.797619
Melatonin	1467881882		C01598,D08170	ChEMBLE_NTD,CHEMBL45	3-acetamido-2-(5-methoxy-1H-indol-3-yl)propanoic acid	121377009	COc1ccc2c(c1)c(c[nH]2)C(C(=O)O)CNC(=O)C			CHEMBL422029	1	0.595238	0.797619
Inuline	1467937390		C08659	CHEMBL1499239,CHEMBL2373784,CHEMBL359227,CHEMBL451362	5-[3,5,14-trihydroxy-10-(hydroxymethyl)-13-methyl-2,3,4,6,7,8,9,11,12,15,16,17-dodecahydro-1H-cyclopenta[a]phenanthren-17-yl]-2-pyranone	29773326	COC1C2C3(CCC(C42C(C1(O)C1(O)CC(C2CC4C1C2OC)OC)N(C3)CC)OC)COC(=O)c1ccccc1NC(=O)C			CHEMBL1240989	1	0.595238	0.797619
Lycoctonine	1467937856		C08697	CHEMBL1242718,CHEMBL1975737,CHEMBL2373561,CHEMBL2374001,CHEMBL517003	5-[3,5,14-trihydroxy-10-(hydroxymethyl)-13-methyl-2,3,4,6,7,8,9,11,12,15,16,17-dodecahydro-1H-cyclopenta[a]phenanthren-17-yl]-2-pyranone	29773326	COC1C2C3(CCC(C42C(C1(O)C1(O)CC(C2CC4C1C2OC)OC)N(C3)CC)OC)COC(=O)c1ccccc1NC(=O)C			CHEMBL1240989	1	0.595238	0.797619
N-Acetylanthranilate	1467916771		C06332		ethyl (3S)-1-(2-acetamidobenzoyl)piperidine-3-carboxylate	8753641	CCOC(=O)C1CCCN(C1)C(=O)c1ccccc1NC(=O)C			CHEMBL1455789	1	0.595238	0.797619
N-(3-acetamido-2-oxo-chromen-6-yl)-2,2,2-trichloro-acetamide	4469992			ChEMBLE_NTD	N-(6-amino-2-oxo-chromen-3-yl)acetamide	4451172	CC(=O)Nc1cc2cc(N)ccc2oc1=O			CHEMBL1977697	1	0.595238	0.797619
N-Acetyl-D-tryptophan	1467893972		C03137	ChEMBLE_NTD,CHEMBL1905494,CHEMBL291829,CHEMBL54170	N-[(2S)-3-(1H-indol-3-yl)-1-[4-(4-methoxyphenyl)-1-piperazinyl]-1-oxopropan-2-yl]acetamide	23696544	COc1ccc(cc1)N1CCN(CC1)C(=O)C(Cc1c[nH]c2c1cccc2)NC(=O)C			CHEMBL1428973	1	0.595238	0.797619
N-[1-(4-ethoxy-2,5-dimethoxyphenyl)propan-2-yl]acetamide	6334603			ChEMBLE_NTD	N-[1-(4-ethyl-2,5-dimethoxyphenyl)propan-2-yl]acetamide	6334475	COc1cc(CC)c(cc1CC(NC(=O)C)C)OC			ChEMBLE_NTD	1	0.595238	0.797619
Carpacin	1467959268		C10435		N-[1-(6-methoxy-1,3-benzodioxol-5-yl)propan-2-yl]acetamide	6334294	CC(NC(=O)C)Cc1cc2OCOc2cc1OC			ChEMBLE_NTD	1	0.595238	0.797619
N-Acetyl-D-tryptophan	1467893972		C03137	ChEMBLE_NTD,CHEMBL1905494,CHEMBL291829,CHEMBL54170	N-[1-[4-(benzenesulfonyl)-1-piperazinyl]-3-(1H-indol-3-yl)-1-oxopropan-2-yl]acetamide	133003811	CC(=O)NC(C(=O)N1CCN(CC1)S(=O)(=O)c1ccccc1)Cc1c[nH]c2c1cccc2			CHEMBL1867472	1	0.595238	0.797619
N-Acetylanthranilate	1467916771		C06332		N-[2-(4-benzylpiperazine-1-carbonyl)phenyl]acetamide	8115516	CC(=O)Nc1ccccc1C(=O)N1CCN(CC1)Cc1ccccc1			CHEMBL1376881	1	0.595238	0.797619
N-Acetylanthranilate	1467916771		C06332		N-[2-[4-(1,3-benzodioxol-5-ylmethyl)piperazine-1-carbonyl]phenyl]acetamide	12226089	CC(=O)Nc1ccccc1C(=O)N1CCN(CC1)Cc1ccc2c(c1)OCO2			CHEMBL1458636	1	0.595238	0.797619
N-Acetylanthranilate	1467916771		C06332		N-[2-[4-(2,3-dimethylphenyl)piperazine-1-carbonyl]phenyl]acetamide	12226111	CC(=O)Nc1ccccc1C(=O)N1CCN(CC1)c1cccc(c1C)C			CHEMBL1585745	1	0.595238	0.797619
trimethylsilyl (E)-3-(1-trimethylsilylindol-3-yl)prop-2-enoate	53329304			ChEMBLE_NTD	trimethylsilyl 2-acetamido-3-(1-trimethylsilylindol-3-yl)propanoate	6220934	CC(=O)NC(C(=O)O[Si](C)(C)C)Cc1cn(c2c1cccc2)[Si](C)(C)C			ChEMBLE_NTD	1	0.595238	0.797619
2-(4-acetamidophenyl)acetic acid	21236		D01395	ChEMBLE_NTD,CHEMBL1885632	2-(4-acetamidophenyl)-N-[4-(4-bromophenoxy)phenyl]acetamide	205918798	O=C(Cc1ccc(cc1)NC(=O)C)Nc1ccc(cc1)Oc1ccc(cc1)Br			CHEMBL1358377	1	0.583333	0.791667
2-(4-acetamidophenyl)acetic acid	21236		D01395	ChEMBLE_NTD,CHEMBL1885632	2-(4-acetamidophenyl)acetic acid methyl ester	6619692	COC(=O)Cc1ccc(cc1)NC(=O)C			CHEMBL1873364	1	0.583333	0.791667
3-Indoleacrylate	1468372493		C21283	CHEMBL445966	2-[(4-acetamido-3-methoxyphenyl)sulfonylamino]-3-(1H-indol-3-yl)propanoic acid	49357763	COc1cc(ccc1NC(=O)C)S(=O)(=O)NC(C(=O)O)Cc1c[nH]c2c1cccc2			CHEMBL1713241	1	0.583333	0.791667
Indolepyruvate	1467869763		C00331	CHEMBL485012	2-[(4-acetamido-3-methoxyphenyl)sulfonylamino]-3-(1H-indol-3-yl)propanoic acid	49357763	COc1cc(ccc1NC(=O)C)S(=O)(=O)NC(C(=O)O)Cc1c[nH]c2c1cccc2			CHEMBL1713241	1	0.583333	0.791667
4-acetamidobenzoate	1468163131	DB04500,EXPT03145		CHEMBL112687	4-acetamido-N-(2-amino-5-phenylphenyl)benzamide	280569854	CC(=O)Nc1ccc(cc1)C(=O)Nc1cc(ccc1N)c1ccccc1			CHEMBL271498	1	0.583333	0.791667
4-acetamidobenzoate	1468163131	DB04500,EXPT03145		CHEMBL112687	4-acetamido-N-(2-fluoro-5-phenylphenyl)benzamide	280569843	CC(=O)Nc1ccc(cc1)C(=O)Nc1cc(ccc1F)c1ccccc1			CHEMBL271497	1	0.583333	0.791667
4-acetamidobenzoate	1468163131	DB04500,EXPT03145		CHEMBL112687	4-acetamido-N-(2,5-dimethoxyphenyl)benzamide	9573688	COc1ccc(cc1NC(=O)c1ccc(cc1)NC(=O)C)OC			CHEMBL1443729	1	0.583333	0.791667
4-acetamidobenzoate	1468163131	DB04500,EXPT03145		CHEMBL112687	4-acetamido-N-(3-pyridyl)benzamide	7404979	CC(=O)Nc1ccc(cc1)C(=O)Nc1cccnc1			CHEMBL1490538	1	0.583333	0.791667
4-acetamidobenzoate	1468163131	DB04500,EXPT03145		CHEMBL112687	4-acetamido-N-(3,4-dioxo-1-naphthyl)benzamide	550349652	CC(=O)Nc1ccc(cc1)C(=O)NC1=CC(=O)C(=O)c2c1cccc2			CHEMBL2296230	1	0.583333	0.791667
4-acetamidobenzoate	1468163131	DB04500,EXPT03145		CHEMBL112687	4-acetamido-N-[(4-fluorophenyl)methyleneamino]benzamide	8628852	O=C(c1ccc(cc1)NC(=O)C)NN=Cc1ccc(cc1)F			CHEMBL3211433	1	0.583333	0.791667
4-acetamidobenzoate	1468163131	DB04500,EXPT03145		CHEMBL112687	4-acetamido-N-[1-(5-ethyl-2-furyl)-2-methoxy-ethyl]benzamide	539250183	COCC(c1ccc(o1)CC)NC(=O)c1ccc(cc1)NC(=O)C			CHEMBL3456458	1	0.583333	0.791667
4-acetamidobenzoate	1468163131	DB04500,EXPT03145		CHEMBL112687	4-acetamido-N-[2-(2-methylindol-1-yl)ethyl]benzamide	530006383	CC(=O)Nc1ccc(cc1)C(=O)NCCn1c(C)cc2c1cccc2			CHEMBL3286643	1	0.583333	0.791667
NAC	1467970821		C11486	CHEMBL24993	4-acetamido-N-[2-(hydroxymethyl)-6-methylphenyl]benzamide	126473589	OCc1cccc(c1NC(=O)c1ccc(cc1)NC(=O)C)C			CHEMBL277891	1	0.583333	0.791667
sulfamerazine	1468367954	DB01581	D02435	ChEMBLE_NTD,CHEMBL438	4-acetamido-N-[4-[(4-methylpyrimidin-2-yl)sulfamoyl]phenyl]benzamide	12259630	CC(=O)Nc1ccc(cc1)C(=O)Nc1ccc(cc1)S(=O)(=O)Nc1nccc(n1)C			CHEMBL1580847	1	0.583333	0.791667
4-acetamidobenzoate	1468163131	DB04500,EXPT03145		CHEMBL112687	4-acetamido-N-[5-(2-methoxyethylthio)-1,3,4-thiadiazol-2-yl]benzamide	30526914	COCCSc1nnc(s1)NC(=O)c1ccc(cc1)NC(=O)C			CHEMBL1439733	1	0.583333	0.791667
4-acetamidobenzoate	1468163131	DB04500,EXPT03145		CHEMBL112687	4-acetamido-N-cyclopentylbenzamide	9572423	O=C(c1ccc(cc1)NC(=O)C)NC1CCCC1			CHEMBL1442970	1	0.583333	0.791667
4-acetamidobenzoate	1468163131	DB04500,EXPT03145		CHEMBL112687	ethyl 5-[(4-acetamidobenzoyl)amino]-4-cyano-3-methyl-thiophene-2-carboxylate	534680737	CCOC(=O)c1sc(c(c1C)C#N)NC(=O)c1ccc(cc1)NC(=O)C			CHEMBL2392593	1	0.583333	0.791667
N-(2-hydroxy-4-sulfamoylphenyl)acetamide	6315721			ChEMBLE_NTD	N-(2-chloro-4-sulfamoylphenyl)acetamide	26841507	CC(=O)Nc1ccc(cc1Cl)S(=O)(=O)N			CHEMBL308459	1	0.583333	0.791667
2,4-Xylidine	1467966012		C11003	CHEMBL1490826	N-(2,4-dimethylphenyl)acetamide	167707	CC(=O)Nc1ccc(cc1C)C			CHEMBL3188564	1	0.583333	0.791667
Phenacetin	1467928107		C07591,D00569	ChEMBLE_NTD,CHEMBL16073	N-(4-ethoxy-2-hydroxyphenyl)acetamide	1921053	CCOc1ccc(c(c1)O)NC(=O)C			CHEMBL528030	1	0.583333	0.791667
4-acetamido-3-methylbenzenesulfonic acid	5392627			ChEMBLE_NTD	N-(4-hydroxy-2-methylphenyl)acetamide	2798634	CC(=O)Nc1ccc(cc1C)O			CHEMBL48333	1	0.583333	0.791667
meta-Cresidine	1468036811		C19376	CHEMBL1361784	N-(4-methoxy-2-methylphenyl)acetamide	2087904	COc1ccc(c(c1)C)NC(=O)C			CHEMBL1884770	1	0.583333	0.791667
2-[5-(2-acetamidophenyl)tetrazol-2-yl]acetamide	9462937			ChEMBLE_NTD,CHEMBL585801	N-[2-(2H-tetrazol-5-yl)phenyl]acetamide	43898837	CC(=O)Nc1ccccc1c1n[nH]nn1			CHEMBL1605041	1	0.583333	0.791667
4-acetamidobenzoate	1468163131	DB04500,EXPT03145		CHEMBL112687	N-[4-[(3-phenylpropanoylamino)carbamoyl]phenyl]acetamide	8642640	O=C(CCc1ccccc1)NNC(=O)c1ccc(cc1)NC(=O)C			CHEMBL1722471	1	0.583333	0.791667
4-acetamidobenzoate	1468163131	DB04500,EXPT03145		CHEMBL112687	N-[4-[(thiophene-2-carbonylamino)carbamoyl]phenyl]acetamide	8978448	CC(=O)Nc1ccc(cc1)C(=O)NNC(=O)c1cccs1			CHEMBL1301608	1	0.583333	0.791667
4-acetamidobenzoate	1468163131	DB04500,EXPT03145		CHEMBL112687	N-[4-[[(3-methylbenzoyl)amino]carbamoyl]phenyl]acetamide	9033653	CC(=O)Nc1ccc(cc1)C(=O)NNC(=O)c1cccc(c1)C			CHEMBL1886842	1	0.583333	0.791667
4-acetamidobenzoate	1468163131	DB04500,EXPT03145		CHEMBL112687	N-[4-[[(4-chlorobenzoyl)amino]carbamoyl]phenyl]acetamide	8475124	O=C(c1ccc(cc1)NC(=O)C)NNC(=O)c1ccc(cc1)Cl			CHEMBL1306909	1	0.583333	0.791667
4-acetamidobenzoate	1468163131	DB04500,EXPT03145		CHEMBL112687	N-[4-[[[2-(4-methoxyphenyl)acetyl]amino]carbamoyl]phenyl]acetamide	9198256	COc1ccc(cc1)CC(=O)NNC(=O)c1ccc(cc1)NC(=O)C			CHEMBL1424494	1	0.583333	0.791667
Adenosine	1467868376	APRD00333,DB00194,EXPT02753	C00212,D00045	ChEMBLE_NTD,CHEMBL1090,CHEMBL11909,CHEMBL1236872,CHEMBL1413677,CHEMBL145188,CHEMBL20247,CHEMBL2051971,CHEMBL3248866,CHEMBL477,CHEMBL91573	N-[4-[[[9-[(2R,3R,4S,5R)-3,4-dihydroxy-5-(hydroxymethyl)-2-oxolanyl]-6-purinyl]amino]methyl]phenyl]acetamide	116086267	OCC1OC(C(C1O)O)n1cnc2c1ncnc2NCc1ccc(cc1)NC(=O)C			CHEMBL261793	1	0.583333	0.791667
Inosine	1467869312	DB04335,EXPT02378	C00294,D00054	ChEMBLE_NTD,CHEMBL1213651,CHEMBL1556,CHEMBL2092757,CHEMBL9850	N-[4-[[[9-[(2R,3R,4S,5R)-3,4-dihydroxy-5-(hydroxymethyl)-2-oxolanyl]-6-purinyl]amino]methyl]phenyl]acetamide	116086267	OCC1OC(C(C1O)O)n1cnc2c1ncnc2NCc1ccc(cc1)NC(=O)C			CHEMBL261793	1	0.583333	0.791667
2-(4-acetamidophenyl)acetic acid	21236		D01395	ChEMBLE_NTD,CHEMBL1885632	N-[4-[2-(4-benzylpiperazin-4-ium-1-yl)-2-oxo-ethyl]phenyl]acetamide	78835148	CC(=O)Nc1ccc(cc1)CC(=O)N1CC[NH+](CC1)Cc1ccccc1			CHEMBL1880477	1	0.583333	0.791667
2-(4-acetamidophenyl)acetic acid	21236		D01395	ChEMBLE_NTD,CHEMBL1885632	N-[4-[2-[2-(5-ethyl-2-furyl)pyrrolidin-1-yl]-2-oxo-ethyl]phenyl]acetamide	539702927	CCc1ccc(o1)C1CCCN1C(=O)Cc1ccc(cc1)NC(=O)C			CHEMBL3457332	1	0.583333	0.791667
N-[2-(trifluoromethoxy)phenyl]acetamide	6898362			ChEMBLE_NTD,CHEMBL601326	N-[2-(trifluoromethyl)phenyl]acetamide	669334	CC(=O)Nc1ccccc1C(F)(F)F			CHEMBL1874545	1	0.57619	0.788095
N-acetyl-L-glutamine	1468073722		D07063	CHEMBL3184604	(2S)-1-[(2R)-2-[[(2S)-2-acetamido-5-amino-5-oxo-pentanoyl]amino]-3-sulfanyl-propanoyl]pyrrolidine-2-carboxylic acid	281668766	SCC(C(=O)N1CCCC1C(=O)O)NC(=O)C(NC(=O)C)CCC(=O)N			CHEMBL485836	1	0.571429	0.785714
Dermorphin	1468042318		C20030	CHEMBL278789,CHEMBL285479	(2S)-1-[(2S)-2-[[2-[[(2S)-2-[[(2S)-2-[[(2S)-2-acetamido-3-(4-hydroxyphenyl)propanoyl]amino]propanoyl]amino]-3-phenyl-propanoyl]amino]acetyl]amino]-3-(4-hydroxyphenyl)propanoyl]-N-[(1S)-2-amino-1-(hydroxymethyl)-2-oxo-ethyl]pyrrolidine-2-carboxamide	278988840	OCC(C(=O)N)NC(=O)C1CCCN1C(=O)C(Cc1ccc(cc1)O)NC(=O)CNC(=O)C(NC(=O)C(NC(=O)C(Cc1ccc(cc1)O)NC(=O)C)C)Cc1ccccc1			CHEMBL418039	1	0.571429	0.785714
N-acetyl-L-tyrosine	1468118736			CHEMBL1972224,CHEMBL291831,CHEMBL65543	(2S)-2-[[(2S)-2-acetamido-3-(4-hydroxyphenyl)propanoyl]amino]-3-phenyl-propanamide	108264416	CC(=O)NC(C(=O)NC(C(=O)N)Cc1ccccc1)Cc1ccc(cc1)O			CHEMBL388382	1	0.571429	0.785714
N-acetyl-L-tyrosine	1468118736			CHEMBL1972224,CHEMBL291831,CHEMBL65543	(2S)-2-[[(2S)-2-acetamido-3-(4-hydroxyphenyl)propanoyl]amino]-N-[(1S)-1-formyl-4-guanidino-butyl]-4-methyl-pentanamide	115641796	O=CC(NC(=O)C(NC(=O)C(Cc1ccc(cc1)O)NC(=O)C)CC(C)C)CCCN=C(N)N			CHEMBL2373044	1	0.571429	0.785714
ATP	1467865531	DB00171,EXPT00007,NUTR00017	C00002,D08646	CHEMBL14249	(2S)-2-[[(2S)-2-acetamido-5-[[amino-(methylcarbamoylamino)methylene]amino]pentanoyl]-methyl-amino]-3-phenyl-propanoic acid	209111406	CNC(=O)NC(=NCCCC(C(=O)N(C(C(=O)O)Cc1ccccc1)C)NC(=O)C)N			CHEMBL493316	1	0.571429	0.785714
3-(4-Hydroxyphenyl)pyruvate	1467878443		C01179	CHEMBL607712	(2S)-2-[[(2S)-2-acetamido-5-guanidino-pentanoyl]amino]-3-(4-hydroxyphenyl)propanoic acid	305726937	CC(=O)NC(C(=O)NC(C(=O)O)Cc1ccc(cc1)O)CCCN=C(N)N			CHEMBL1221994	1	0.571429	0.785714
L-Tyrosine	1467866617	DB00135,NUTR00059	C00082,C01536,C06420,D00022	CHEMBL1076637,CHEMBL108615,CHEMBL925	(2S)-2-[[(2S)-2-acetamido-5-guanidino-pentanoyl]amino]-3-(4-hydroxyphenyl)propanoic acid	305726937	CC(=O)NC(C(=O)NC(C(=O)O)Cc1ccc(cc1)O)CCCN=C(N)N			CHEMBL1221994	1	0.571429	0.785714
N(alpha)-acetyl-L-arginine	1469347320	DB01985,EXPT00382			(2S)-2-[[(2S)-2-acetamido-5-guanidino-pentanoyl]amino]-3-(4-hydroxyphenyl)propanoic acid	305726937	CC(=O)NC(C(=O)NC(C(=O)O)Cc1ccc(cc1)O)CCCN=C(N)N			CHEMBL1221994	1	0.571429	0.785714
N(alpha)-acetyl-L-arginine	1469347320	DB01985,EXPT00382			(2S)-2-[[(2S)-2-acetamido-5-guanidino-pentanoyl]amino]-3-hydroxy-propanoic acid	305726915	OCC(C(=O)O)NC(=O)C(NC(=O)C)CCCN=C(N)N			CHEMBL1221992	1	0.571429	0.785714
N(alpha)-acetyl-L-arginine	1469347320	DB01985,EXPT00382			(2S)-2-[[(2S)-2-acetamido-5-guanidino-pentanoyl]amino]-3-methyl-butanoic acid	305726948	CC(=O)NC(C(=O)NC(C(=O)O)C(C)C)CCCN=C(N)N			CHEMBL1221995	1	0.571429	0.785714
N(alpha)-acetyl-L-arginine	1469347320	DB01985,EXPT00382			(2S)-2-[[(2S)-2-acetamido-5-guanidino-pentanoyl]amino]-4-methyl-pentanoic acid	305726926	CC(CC(C(=O)O)NC(=O)C(NC(=O)C)CCCN=C(N)N)C			CHEMBL1221993	1	0.571429	0.785714
N-Acetyl-L-glutamate 5-semialdehyde	1467879139		C01250		(2S)-2-acetamido-5-(cyclohexylcarbamothioylamino)pentanoate	21141965	S=C(NC1CCCCC1)NCCCC(C(=O)[O-])NC(=O)C			CHEMBL1901234	1	0.571429	0.785714
N(alpha)-acetyl-L-arginine	1469347320	DB01985,EXPT00382			(2S)-2-acetamido-5-guanidino-N-[(1S)-2-(hydroxyamino)-1-methyl-2-oxo-ethyl]pentanamide	279304661	ONC(=O)C(NC(=O)C(NC(=O)C)CCCN=C(N)N)C			CHEMBL81890	1	0.571429	0.785714
N-acetyl-L-tyrosine	1468118736			CHEMBL1972224,CHEMBL291831,CHEMBL65543	(2S)-2-acetamido-N-(4-bromophenyl)azo-3-(4-hydroxyphenyl)-N-methylpropanamide	550431339	CC(=O)NC(C(=O)N(N=Nc1ccc(cc1)Br)C)Cc1ccc(cc1)O			CHEMBL3086528	1	0.571429	0.785714
N-acetyl-L-tyrosine	1468118736			CHEMBL1972224,CHEMBL291831,CHEMBL65543	(2S)-2-acetamido-N-(4-cyanophenyl)azo-3-(4-hydroxyphenyl)-N-methylpropanamide	550548451	N#Cc1ccc(cc1)N=NN(C(=O)C(Cc1ccc(cc1)O)NC(=O)C)C			CHEMBL3086527	1	0.571429	0.785714
N(alpha)-acetyl-L-arginine	1469347320	DB01985,EXPT00382			(2S)-2-acetamido-N-[(1S)-2-amino-1-(hydroxymethyl)-2-oxo-ethyl]-5-guanidino-pentanamide	126909601	OCC(C(=O)N)NC(=O)C(NC(=O)C)CCCN=C(N)N			CHEMBL104404	1	0.571429	0.785714
N-acetyl-L-tyrosine	1468118736			CHEMBL1972224,CHEMBL291831,CHEMBL65543	(2S)-2-acetamido-N-[2-(hydroxyamino)-2-oxoethyl]-3-(4-hydroxyphenyl)propanamide	279307205	ONC(=O)CNC(=O)C(Cc1ccc(cc1)O)NC(=O)C			CHEMBL311264	1	0.571429	0.785714
N-acetyl-L-tyrosine	1468118736			CHEMBL1972224,CHEMBL291831,CHEMBL65543	(2S)-2-acetamido-N-[8-(3-aminopropylamino)octyl]-3-(4-hydroxyphenyl)propanamide	98338590	NCCCNCCCCCCCCNC(=O)C(Cc1ccc(cc1)O)NC(=O)C			CHEMBL422161	1	0.571429	0.785714
(3R,6S,9S,12S,23S)-15-[[(2S)-2-acetamidohexanoyl]amino]-9-benzyl-6-(3-guanidinopropyl)-12-(1H-imidazol-5-ylmethyl)-3-(1H-indol-3-ylmethyl)-2,5,8,11,14,17-hexaoxo-1,4,7,10,13,18-hexazacyclotricosane-23-carboxylic acid	60848832		D06569	CHEMBL2070241	(3S,6S,9R,12S,15S,23S)-15-[[(2S)-2-acetamidohexanoyl]amino]-9-benzyl-6-(3-guanidinopropyl)-12-(1H-imidazol-5-ylmethyl)-3-(1H-indol-3-ylmethyl)-2,5,8,11,14,17-hexaoxo-1,4,7,10,13,18-hexazacyclotricosane-23-carboxamide	2061170	CCCCC(C(=O)NC1CC(=O)NCCCCC(NC(=O)C(NC(=O)C(NC(=O)C(NC(=O)C(NC1=O)Cc1[nH]cnc1)Cc1ccccc1)CCCN=C(N)N)Cc1c[nH]c2c1cccc2)C(=O)N)NC(=O)C			CHEMBL430239	1	0.571429	0.785714
N-acetyl-L-tyrosine	1468118736			CHEMBL1972224,CHEMBL291831,CHEMBL65543	(3S)-3-[[(2S)-2-[[(2S)-2-acetamido-3-(4-hydroxyphenyl)propanoyl]amino]-3-methyl-butanoyl]amino]-4-oxo-butanoic acid	279280533	O=CC(NC(=O)C(C(C)C)NC(=O)C(Cc1ccc(cc1)O)NC(=O)C)CC(=O)O			CHEMBL77345	1	0.571429	0.785714
N-acetyl-L-tyrosine	1468118736			CHEMBL1972224,CHEMBL291831,CHEMBL65543	(3S)-3-[[(2S)-2-[[(2S)-2-acetamido-3-(4-hydroxyphenyl)propanoyl]amino]propanoyl]amino]-4-oxo-butanoic acid	279281212	O=CC(NC(=O)C(NC(=O)C(Cc1ccc(cc1)O)NC(=O)C)C)CC(=O)O			CHEMBL78028	1	0.571429	0.785714
N-acetyl-L-tyrosine	1468118736			CHEMBL1972224,CHEMBL291831,CHEMBL65543	(3S)-3-[[(2S)-2-acetamido-3-(4-hydroxyphenyl)propanoyl]amino]-4-oxo-butanoic acid	279280522	O=CC(NC(=O)C(Cc1ccc(cc1)O)NC(=O)C)CC(=O)O			CHEMBL306324	1	0.571429	0.785714
N-Acetyl-L-glutamate	1467872933	DB04075,EXPT02356	C00624	ChEMBLE_NTD,CHEMBL1234751,CHEMBL2142890	(4S)-4-acetamido-5-[(2S)-2-carbamoyl-1-pyrrolidinyl]-5-oxopentanoic acid	109643857	CC(=O)NC(C(=O)N1CCCC1C(=O)N)CCC(=O)O			CHEMBL2371824	1	0.571429	0.785714
(Z)-4-(ethylamino)-4-oxo-2-butenoic acid methyl ester	60774141			ChEMBLE_NTD,CHEMBL487618	(Z)-4-(ethylamino)-4-oxo-2-butenoic acid methyl ester	60774132	CC(=O)NCC1C(=O)OC2C1CCC(=CCCC1(C2O1)C)C			ChEMBLE_NTD,CHEMBL519906	1	0.571429	0.785714
Parthenolide	1467928317		C07609	ChEMBLE_NTD,CHEMBL1356390,CHEMBL1527933,CHEMBL1601875,CHEMBL2142363,CHEMBL2357484,CHEMBL3186408,CHEMBL3322515,CHEMBL3322516,CHEMBL363656,CHEMBL388727,CHEMBL465158,CHEMBL477923,CHEMBL540445	(Z)-4-(ethylamino)-4-oxo-2-butenoic acid methyl ester	60774132	CC(=O)NCC1C(=O)OC2C1CCC(=CCCC1(C2O1)C)C			ChEMBLE_NTD,CHEMBL519906	1	0.571429	0.785714
Glutamyl-glutamic acid	1467880480		C01425	CHEMBL318315	2-[(2-acetamido-4-carboxy-butanoyl)amino]pentanedioic acid	126181830	OC(=O)CCC(C(=O)NC(C(=O)O)CCC(=O)O)NC(=O)C			CHEMBL91492	1	0.571429	0.785714
N-Acetyl-L-glutamate	1467872933	DB04075,EXPT02356	C00624	ChEMBLE_NTD,CHEMBL1234751,CHEMBL2142890	2-[(2-acetamido-4-carboxy-butanoyl)amino]pentanedioic acid	126181830	OC(=O)CCC(C(=O)NC(C(=O)O)CCC(=O)O)NC(=O)C			CHEMBL91492	1	0.571429	0.785714
2-[[2-amino-3-[4-[bis(2-chloroethyl)amino]phenyl]propanoyl]amino]-4-methyl-pentanoic acid	5316527			ChEMBLE_NTD	2-[[2-acetamido-3-[4-[bis(2-chloroethyl)amino]phenyl]propanoyl]amino]-4-methyl-pentanoic acid	5316377	ClCCN(c1ccc(cc1)CC(C(=O)NC(C(=O)O)CC(C)C)NC(=O)C)CCCl			CHEMBL1312861	1	0.571429	0.785714
4-O-Dimethylallyl-L-tyrosine	1468049330		C20983		2-acetamido-3-[4-(3-methylbut-2-enoxy)phenyl]propanoic acid	101096245	CC(=CCOc1ccc(cc1)CC(C(=O)O)NC(=O)C)C			CHEMBL2022663,CHEMBL509651	1	0.571429	0.785714
2-acetamido-N-benzyl-5-(propylamino)pentanamide	4764784			ChEMBLE_NTD,CHEMBL1982826	2-acetamido-5-amino-N-benzyl-pentanamide	4764773	NCCCC(C(=O)NCc1ccccc1)NC(=O)C			CHEMBL1983942	1	0.571429	0.785714
benzyl N-[4-acetamido-5-(benzylamino)-5-oxo-pentyl]carbamate	4764751			ChEMBLE_NTD,CHEMBL1964309	2-acetamido-5-amino-N-benzyl-pentanamide	4764773	NCCCC(C(=O)NCc1ccccc1)NC(=O)C			CHEMBL1983942	1	0.571429	0.785714
N-Acetylornithine	1467870941		C00437		2-acetamido-5-amino-N-benzyl-pentanamide	4764773	NCCCC(C(=O)NCc1ccccc1)NC(=O)C			CHEMBL1983942	1	0.571429	0.785714
N-acetyl-L-tyrosine	1468118736			CHEMBL1972224,CHEMBL291831,CHEMBL65543	2-acetamido-N-(2-amino-3-oxo-3-phenylpropyl)-3-(4-hydroxyphenyl)propanamide	340642154	CC(=O)NC(C(=O)NCC(C(=O)c1ccccc1)N)Cc1ccc(cc1)O			CHEMBL2355917	1	0.571429	0.785714
2-acetamido-N-benzyl-5-[methylcarbamoyl(propyl)amino]pentanamide	4764850			ChEMBLE_NTD,CHEMBL1994218	2-acetamido-N-benzyl-5-(methylcarbamoylamino)pentanamide	4764839	CNC(=O)NCCCC(C(=O)NCc1ccccc1)NC(=O)C			CHEMBL1972832	1	0.571429	0.785714
2-acetamido-N-benzyl-5-(propylamino)pentanamide	4764784			ChEMBLE_NTD,CHEMBL1982826	2-acetamido-N-benzyl-5-[[methyl(nitroso)carbamoyl]-propyl-amino]pentanamide	4764883	CCCN(C(=O)N(N=O)C)CCCC(C(=O)NCc1ccccc1)NC(=O)C			ChEMBLE_NTD,CHEMBL1981869	1	0.571429	0.785714
2-acetamido-N-benzyl-5-[[methyl(nitroso)carbamoyl]-propyl-amino]pentanamide	4764883			ChEMBLE_NTD,CHEMBL1981869	2-acetamido-N-benzyl-5-[[methyl(nitroso)carbamoyl]amino]pentanamide	4764872	O=NN(C(=O)NCCCC(C(=O)NCc1ccccc1)NC(=O)C)C			CHEMBL1999027	1	0.571429	0.785714
N-Acetyl-beta-alanine	1467877411		C01073		3-acetamido-N-(5-fluoro-2-methylphenyl)propanamide	48507005	Cc1ccc(cc1NC(=O)CCNC(=O)C)F			CHEMBL1887210	1	0.571429	0.785714
N-Acetyl-beta-alanine	1467877411		C01073		3-acetamido-N-[(4-fluorophenyl)methyl]propanamide	20505973	O=C(CCNC(=O)C)NCc1ccc(cc1)F			CHEMBL1331397	1	0.571429	0.785714
N-Acetyl-beta-alanine	1467877411		C01073		3-acetamido-N-methyl-N-(4-pyrrolidin-1-ylbut-2-ynyl)propanamide	6681448	CC(=O)NCCC(=O)N(CC#CCN1CCCC1)C			CHEMBL352081	1	0.571429	0.785714
N-methyl-4-pyrrolidin-1-yl-but-2-yn-1-amine	6275886			ChEMBLE_NTD	3-acetamido-N-methyl-N-(4-pyrrolidin-1-ylbut-2-ynyl)propanamide	6681448	CC(=O)NCCC(=O)N(CC#CCN1CCCC1)C			CHEMBL352081	1	0.571429	0.785714
N-Acetyl-beta-alanine	1467877411		C01073		4-(3-acetamidopropanoylamino)benzamide	24496493	CC(=O)NCCC(=O)Nc1ccc(cc1)C(=O)N			CHEMBL1312590	1	0.571429	0.785714
N-acetyl-L-tyrosine	1468118736			CHEMBL1972224,CHEMBL291831,CHEMBL65543	Ac-Tyr-OEt	1467882361	CCOC(=O)C(Cc1ccc(cc1)O)NC(=O)C		C01657	ChEMBLE_NTD,CHEMBL1354672,CHEMBL3278820,CHEMBL57662	1	0.571429	0.785714
Tyr-OEt	1467880705		C01458	CHEMBL292389	Ac-Tyr-OEt	1467882361	CCOC(=O)C(Cc1ccc(cc1)O)NC(=O)C		C01657	ChEMBLE_NTD,CHEMBL1354672,CHEMBL3278820,CHEMBL57662	1	0.571429	0.785714
4-Chloroacetanilide	1467991745		C14494	CHEMBL15991	Acetanilide	1467927844	CC(=O)Nc1ccccc1		C07565	ChEMBLE_NTD,CHEMBL269644	1	0.571429	0.785714
Aniline	1467869297	DB06728	C00292	CHEMBL538	Acetanilide	1467927844	CC(=O)Nc1ccccc1		C07565	ChEMBLE_NTD,CHEMBL269644	1	0.571429	0.785714
N-(1-methyl-4-piperidyl)-N-phenyl-acetamide	6191001			ChEMBLE_NTD	Acetanilide	1467927844	CC(=O)Nc1ccccc1		C07565	ChEMBLE_NTD,CHEMBL269644	1	0.571429	0.785714
N-Acetylanthranilate	1467916771		C06332		Acetanilide	1467927844	CC(=O)Nc1ccccc1		C07565	ChEMBLE_NTD,CHEMBL269644	1	0.571429	0.785714
N,N-dimethyl-N'-phenylethanimidamide	6175191			ChEMBLE_NTD	Acetanilide	1467927844	CC(=O)Nc1ccccc1		C07565	ChEMBLE_NTD,CHEMBL269644	1	0.571429	0.785714
o-Chloroacetanilide	1467993096		C14619		Acetanilide	1467927844	CC(=O)Nc1ccccc1		C07565	ChEMBLE_NTD,CHEMBL269644	1	0.571429	0.785714
Phenylacetylglycine dimethylamide	1467982346		C12958,D01508	CHEMBL3184273	Acetanilide	1467927844	CC(=O)Nc1ccccc1		C07565	ChEMBLE_NTD,CHEMBL269644	1	0.571429	0.785714
Ac-Tyr-OEt	1467882361		C01657	ChEMBLE_NTD,CHEMBL1354672,CHEMBL3278820,CHEMBL57662	ethyl 2-acetamido-3-(4-phosphonooxyphenyl)propanoate	279293646	CCOC(=O)C(Cc1ccc(cc1)OP(=O)(O)O)NC(=O)C			CHEMBL78797	1	0.571429	0.785714
ethyl 2-acetamido-6-bromo-7-methoxy-benzothiophene-3-carboxylate	6323932			ChEMBLE_NTD,CHEMBL1459687	ethyl 2-acetamido-7-methoxy-benzothiophene-3-carboxylate	7978263	CCOC(=O)c1c(NC(=O)C)sc2c1cccc2OC			CHEMBL1461021	1	0.571429	0.785714
(4-acetamidocyclohex-2-en-1-yl) acetate	6300967			ChEMBLE_NTD	N-(4-hydroxycyclohex-2-en-1-yl)acetamide	6300956	CC(=O)NC1CCC(C=C1)O			ChEMBLE_NTD	1	0.571429	0.785714
N-(4-oxocyclohex-2-en-1-yl)acetamide	6300733			ChEMBLE_NTD	N-(4-hydroxycyclohex-2-en-1-yl)acetamide	6300956	CC(=O)NC1CCC(C=C1)O			ChEMBLE_NTD	1	0.571429	0.785714
N-(5-hydroxy-7-oxabicyclo[4.1.0]heptan-2-yl)acetamide	6288291			ChEMBLE_NTD	N-(4-hydroxycyclohex-2-en-1-yl)acetamide	6300956	CC(=O)NC1CCC(C=C1)O			ChEMBLE_NTD	1	0.571429	0.785714
1,4-Cyclohexanedione	1467931162		C08063		N-(4-oxocyclohexyl)acetamide	6301184	O=C1CCC(CC1)NC(=O)C			ChEMBLE_NTD	1	0.571429	0.785714
N-(4-oxocyclohex-2-en-1-yl)acetamide	6300733			ChEMBLE_NTD	N-(4-oxocyclohexyl)acetamide	6301184	O=C1CCC(CC1)NC(=O)C			ChEMBLE_NTD	1	0.571429	0.785714
D-Glucono-1,5-lactone	1467868204	DB04564,EXPT02023	C00198,C02669,C02692,D04332	ChEMBLE_NTD,CHEMBL1200829	N-[(3R,4S,5S,6R)-3,4,5-trihydroxy-6-(hydroxymethyl)-2-oxanyl]acetamide	2627459	OCC1OC(NC(=O)C)C(C(C1O)O)O			CHEMBL3351143,CHEMBL335315	1	0.571429	0.785714
D-Glucose	1467865936	DB02379,EXPT00455,EXPT00685,EXPT01603	C00031,C00124,C00159,C00221,C00267,C00737,C00738,C00936,C00962,C00984,C01487,C01825,C02209,C06464,C06465,C06466,C06467,C15923,C21032,C21050,D00009	CHEMBL103010,CHEMBL1222152,CHEMBL1222250,CHEMBL1233058,CHEMBL1453070,CHEMBL1519430,CHEMBL1614854,CHEMBL1873035,CHEMBL195923,CHEMBL2093058,CHEMBL2115552,CHEMBL300520,CHEMBL3186423,CHEMBL365590,CHEMBL423707,CHEMBL469448,CHEMBL98182	N-[(3R,4S,5S,6R)-3,4,5-trihydroxy-6-(hydroxymethyl)-2-oxanyl]acetamide	2627459	OCC1OC(NC(=O)C)C(C(C1O)O)O			CHEMBL3351143,CHEMBL335315	1	0.571429	0.785714
D-Glucose 1-phosphate	1467866916		C00103,C00446,C00636,C00663,C01002,C01171,C03384,C15924,C15926	CHEMBL1159526,CHEMBL1741538,CHEMBL291890,CHEMBL67622	N-[(3R,4S,5S,6R)-3,4,5-trihydroxy-6-(hydroxymethyl)-2-oxanyl]acetamide	2627459	OCC1OC(NC(=O)C)C(C(C1O)O)O			CHEMBL3351143,CHEMBL335315	1	0.571429	0.785714
PHENYLGLYOXAL	1469320193			ChEMBLE_NTD,CHEMBL233632	N-[(3S)-2,6-dioxo-1-phenacyl-3-piperidyl]acetamide	298769369	CC(=O)NC1CCC(=O)N(C1=O)CC(=O)c1ccccc1			CHEMBL1097554	1	0.571429	0.785714
Uridine	1467869376		C00299,C16745	CHEMBL100259,CHEMBL1092065,CHEMBL2093066,CHEMBL608294,CHEMBL609651,CHEMBL68846	N-[[(2R,3S,4R,5R)-5-[[(2R,3S,4R,5R)-5-(2,4-dioxo-1-pyrimidinyl)-3,4-dihydroxy-2-oxolanyl]methoxy]-3,4-dihydroxy-2-oxolanyl]methyl]acetamide	279721382	CC(=O)NCC1OC(C(C1O)O)OCC1OC(C(C1O)O)n1ccc(=O)[nH]c1=O			CHEMBL357228	1	0.571429	0.785714
Sermorelin	1467932159		C08192,D08509	CHEMBL2364549,CHEMBL3350328,CHEMBL428135	N-[2-(aminomethyl)-3H-benzimidazol-5-yl]-N-[(2-phenylmethoxyphenyl)methyl]acetamide	279238867	NCCCCC(C(=O)NC(C(=O)NC(C(=O)NCC(=O)NC(C(=O)NC(C(=O)NC(C(=O)NC(C(=O)NC(C(=O)NC(C(=O)NC(C(=O)NC(C(=O)NC(C(=O)NC(C(=O)NC(C(=O)NC(C(=O)NC(C(=O)NC(C(=O)N)CCCN=C(N)N)CO)CCSC)C(CC)C)CC(=O)O)CCC(=O)N)CC(C)C)CC(C)C)CCCCN)CCCN=C(N)N)C)CO)CC(C)C)CCC(=O)N)CC(C)C)C(C)C)NC(=O)C(NC(=O)C(NC(=O)C(NC(=O)C(NC(=O)C(C(O)C)NC(=O)C(NC(=O)C(C(CC)C)NC(=O)C(NC(=O)C(NC(=O)C(NC(=O)C(Cc1ccc(cc1)O)NC(=O)C)C)CC(=O)O)C)Cc1ccccc…			CHEMBL2096901,CHEMBL3349027,CHEMBL413014	1	0.571429	0.785714
3-Acetamidopropanal	1468025890		C18170		N-[3-(4-methylindazol-1-yl)propyl]acetamide	375170904	CC(=O)NCCCn1ncc2c1cccc2C			CHEMBL3445912	1	0.571429	0.785714
4-Toluenesulfonamide	1467990837		C14412	CHEMBL574	N-[3-(p-tolylsulfonylamino)propyl]acetamide	21237657	CC(=O)NCCCNS(=O)(=O)c1ccc(cc1)C			CHEMBL1885923	1	0.571429	0.785714
3-Acetamidopropanal	1468025890		C18170		N-[3-[(2-bromo-5-fluorophenyl)methylamino]propyl]acetamide	548661018	CC(=O)NCCCNCc1cc(F)ccc1Br			CHEMBL3466973	1	0.571429	0.785714
3,4-Dihydroxymandelaldehyde	1467910519		C05577		N-[3-[[2-(3,4-dihydroxyphenyl)-2-hydroxyethyl]amino]propyl]acetamide	279773977	CC(=O)NCCCNCC(c1ccc(c(c1)O)O)O			CHEMBL156706	1	0.571429	0.785714
L-Noradrenaline	1467872196	APRD01299,DB00368	C00547,D00076	ChEMBLE_NTD,CHEMBL1437,CHEMBL18824,CHEMBL2311152,CHEMBL432	N-[3-[[2-(3,4-dihydroxyphenyl)-2-hydroxyethyl]amino]propyl]acetamide	279773977	CC(=O)NCCCNCC(c1ccc(c(c1)O)O)O			CHEMBL156706	1	0.571429	0.785714
3-Acetamidopropanal	1468025890		C18170		N-[3-[2-[2-(2-aminoethylamino)ethylamino]ethylamino]propyl]acetamide	299509619	NCCNCCNCCNCCCNC(=O)C			CHEMBL3526696	1	0.571429	0.785714
Trientine	1467924300	DB06824	C07166	CHEMBL609	N-[3-[2-[2-(2-aminoethylamino)ethylamino]ethylamino]propyl]acetamide	299509619	NCCNCCNCCNCCCNC(=O)C			CHEMBL3526696	1	0.571429	0.785714
2-hydroxy-N-[3-[3-(1-piperidylmethyl)phenoxy]propyl]acetamide	2049519		D08494		N-[3-[3-(1-piperidylmethyl)phenoxy]propyl]acetamide	96461890	CC(=O)NCCCOc1cccc(c1)CN1CCCCC1			CHEMBL145637	1	0.571429	0.785714
3-Acetamidopropanal	1468025890		C18170		N-[3-[3-(3-aminopropylamino)propylamino]propyl]acetamide	98672751	NCCCNCCCNCCCNC(=O)C			CHEMBL121239	1	0.571429	0.785714
Norspermidine	1467895694		C03375	CHEMBL28743	N-[3-[3-(3-aminopropylamino)propylamino]propyl]acetamide	98672751	NCCCNCCCNCCCNC(=O)C			CHEMBL121239	1	0.571429	0.785714
Norspermine	1468049474		C21004	CHEMBL91193	N-[3-[3-(3-aminopropylamino)propylamino]propyl]acetamide	98672751	NCCCNCCCNCCCNC(=O)C			CHEMBL121239	1	0.571429	0.785714
1-phenyl-3-(2-thienyl)prop-2-en-1-one	3770331			ChEMBLE_NTD,CHEMBL1894107,CHEMBL315053	N-[3-oxo-3-phenyl-1-(2-thienyl)propyl]acetamide	374652160	CC(=O)NC(c1cccs1)CC(=O)c1ccccc1			CHEMBL1818933	1	0.571429	0.785714
N-Acetyl-D-mannosamine	1468065130		C00645	CHEMBL3182062	N-[3,4,5-trihydroxy-1-oxo-6-[[3,4,5-trihydroxy-6-(hydroxymethyl)-2-oxanyl]oxy]hexan-2-yl]acetamide	16163	O=CC(C(C(C(COC1OC(CO)C(C(C1O)O)O)O)O)O)NC(=O)C			ChEMBLE_NTD	1	0.571429	0.785714
Bis(5'-adenosyl) pentaphosphate	1467900317	DB01717,EXPT00535	C04058	CHEMBL437508	N-[4-(2-acetamido-3-amino-3-oxopropyl)phenyl]-[[[(2R,3S,4R,5R)-5-(6-aminopurin-9-yl)-3,4-dihydroxy-2-oxolanyl]methoxy-hydroxyphosphoryl]oxy-hydroxyphosphoryl]oxyphosphonamidic acid	124822538	CC(=O)NC(C(=O)N)Cc1ccc(cc1)NP(=O)(OP(=O)(OP(=O)(OCC1OC(C(C1O)O)n1cnc2c1ncnc2N)O)O)O			CHEMBL509039	1	0.571429	0.785714
N-acetyl-L-tyrosine	1468118736			CHEMBL1972224,CHEMBL291831,CHEMBL65543	N-acetyl-L-tyrosylglycylglycine	1468384127	O=C(CNC(=O)C(Cc1ccc(cc1)O)NC(=O)C)NCC(=O)O			CHEMBL406711	1	0.571429	0.785714
Cyclohexanone	1467870707		C00414	CHEMBL18850	N-cyclohexylacetamide	147808	CC(=O)NC1CCCCC1			CHEMBL11727	1	0.571429	0.785714
Cyclohexylamine	1469382959	DB02995,EXPT01690	C00571	CHEMBL1794762	N-cyclohexylacetamide	147808	CC(=O)NC1CCCCC1			CHEMBL11727	1	0.571429	0.785714
N-(2-bromoallyl)-N-cyclohexyl-acetamide	589544			ChEMBLE_NTD,CHEMBL1974335	N-cyclohexylacetamide	147808	CC(=O)NC1CCCCC1			CHEMBL11727	1	0.571429	0.785714
N'-cyclohexyl-N,N-dimethylethanimidamide	6175146			ChEMBLE_NTD	N-cyclohexylacetamide	147808	CC(=O)NC1CCCCC1			CHEMBL11727	1	0.571429	0.785714
1,3-Diaminopropane	1467876613		C00986	CHEMBL174324	N1-Acetylspermidine	1467872821	[N+]CCCC[N+]CCCNC(=O)C		C00612	CHEMBL176800	1	0.571429	0.785714
3-(4-aminobutylamino)propanal	2573766				N1-Acetylspermidine	1467872821	[N+]CCCC[N+]CCCNC(=O)C		C00612	CHEMBL176800	1	0.571429	0.785714
3-Acetamidopropanal	1468025890		C18170		N1-Acetylspermidine	1467872821	[N+]CCCC[N+]CCCNC(=O)C		C00612	CHEMBL176800	1	0.571429	0.785714
3-Aminopropanal	1467911289		C05665		N1-Acetylspermidine	1467872821	[N+]CCCC[N+]CCCNC(=O)C		C00612	CHEMBL176800	1	0.571429	0.785714
N-Acetylputrescine	1467890812		C02714	CHEMBL81241	N1-Acetylspermidine	1467872821	[N+]CCCC[N+]CCCNC(=O)C		C00612	CHEMBL176800	1	0.571429	0.785714
N1-Acetylspermine	1467889755		C02567	CHEMBL131004	N1-Acetylspermidine	1467872821	[N+]CCCC[N+]CCCNC(=O)C		C00612	CHEMBL176800	1	0.571429	0.785714
N1,N12-Diacetylspermine	1467895906		C03413		N1-Acetylspermidine	1467872821	[N+]CCCC[N+]CCCNC(=O)C		C00612	CHEMBL176800	1	0.571429	0.785714
N1,N8-Diacetylspermidine	1469317356			CHEMBL2008816	N1-Acetylspermidine	1467872821	[N+]CCCC[N+]CCCNC(=O)C		C00612	CHEMBL176800	1	0.571429	0.785714
N4-Acetylaminobutanal	1467913450		C05936		N1-Acetylspermidine	1467872821	[N+]CCCC[N+]CCCNC(=O)C		C00612	CHEMBL176800	1	0.571429	0.785714
Spermidine	1467869584		C00315	CHEMBL19612	N1-Acetylspermidine	1467872821	[N+]CCCC[N+]CCCNC(=O)C		C00612	CHEMBL176800	1	0.571429	0.785714
4-Chloroacetanilide	1467991745		C14494	CHEMBL15991	2-acetamido-5-chlorobenzoic acid	4529946	CC(=O)Nc1ccc(cc1C(=O)O)Cl			CHEMBL1452188	1	0.559524	0.779762
N-Acetylanthranilate	1467916771		C06332		2-acetamido-5-chlorobenzoic acid	4529946	CC(=O)Nc1ccc(cc1C(=O)O)Cl			CHEMBL1452188	1	0.559524	0.779762
2-amino-N1,N4-bis[4-(4,5-dihydro-1H-imidazol-2-yl)phenyl]terephthalamide	5167806			ChEMBLE_NTD,CHEMBL585982	2-acetamido-N1,N4-bis[4-(4,5-dihydro-1H-imidazol-2-yl)phenyl]terephthalamide	5181426	CC(=O)Nc1cc(ccc1C(=O)Nc1ccc(cc1)C1=NCCN1)C(=O)Nc1ccc(cc1)C1=NCCN1			ChEMBLE_NTD,CHEMBL535197	1	0.559524	0.779762
N-[3-[(4-anilino-8-cyano-2-pyrazolo[1,5-a][1,3,5]triazinyl)amino]phenyl]acetamide	198052889	DB08362		CHEMBL230354	3-[[2-(3-acetamidoanilino)-8-cyano-4-pyrazolo[1,5-a][1,3,5]triazinyl]amino]benzoic acid	280295047	N#Cc1cnn2c1nc(Nc1cccc(c1)NC(=O)C)nc2Nc1cccc(c1)C(=O)O			CHEMBL395969	1	0.547619	0.77381
N-(2-Phenylethyl)-acetamide	1467920877		C06746	CHEMBL99827	N-(2,3-diphenylpropyl)acetamide	131362149	CC(=O)NCC(c1ccccc1)Cc1ccccc1			CHEMBL376693	1	0.547619	0.77381
Thien-2-ylacetate	1467889964		C02595		N-(3-acetamidophenyl)-2-(2-thienyl)acetamide	12224978	O=C(Cc1cccs1)Nc1cccc(c1)NC(=O)C			CHEMBL1481151	1	0.547619	0.77381
1,3,7-Trimethyluric acid	1468009711		C16361	CHEMBL1767	N-(3-acetamidophenyl)-2-[(1,3,7-trimethyl-2,6-dioxo-8-purinyl)thio]acetamide	30828822	O=C(Nc1cccc(c1)NC(=O)C)CSc1nc2c(n1C)c(=O)n(c(=O)n2C)C			CHEMBL1527889	1	0.547619	0.77381
2,4-Dichlorobenzoate	1467920172		C06670	CHEMBL1492029	N-(3-acetamidophenyl)-2,4-dichlorobenzamide	6315891	CC(=O)Nc1cccc(c1)NC(=O)c1ccc(cc1Cl)Cl			ChEMBLE_NTD	1	0.547619	0.77381
2,4-Dichlorobenzoyl-CoA	1467920185		C06671		N-(3-acetamidophenyl)-2,4-dichlorobenzamide	6315891	CC(=O)Nc1cccc(c1)NC(=O)c1ccc(cc1Cl)Cl			ChEMBLE_NTD	1	0.547619	0.77381
N-[2-[5-amino-1-(chloromethyl)-1,2-dihydrobenzo[e]indole-3-carbonyl]-1H-indol-5-yl]acetamide	4970888			ChEMBLE_NTD,CHEMBL114467	N-[2-[1-(chloromethyl)-5-hydroxy-1,2-dihydrobenzo[e]indole-3-carbonyl]-1H-indol-5-yl]acetamide	104746576	ClCC1CN(c2c1c1ccccc1c(c2)O)C(=O)c1cc2c([nH]1)ccc(c2)NC(=O)C			CHEMBL289334	1	0.540476	0.770238
2-Deoxy-2,3-dehydro-N-acetylneuraminic acid	1467904028		C04580	CHEMBL1161589,CHEMBL116550,CHEMBL291345,CHEMBL334952,CHEMBL416139,CHEMBL77627,CHEMBL96712	(2R,3R,4S)-3-acetamido-4-(1-naphthylcarbamothioylamino)-2-[(1R,2R)-1,2,3-trihydroxypropyl]-3,4-dihydro-2H-pyran-6-carboxylic acid	482466716	OCC(C(C1OC(=CC(C1NC(=O)C)NC(=S)Nc1cccc2c1cccc2)C(=O)O)O)O			CHEMBL2041297	1	0.535714	0.767857
2-Deoxy-2,3-dehydro-N-acetylneuraminic acid	1467904028		C04580	CHEMBL1161589,CHEMBL116550,CHEMBL291345,CHEMBL334952,CHEMBL416139,CHEMBL77627,CHEMBL96712	(2R,3R,4S)-3-acetamido-4-(1,4-dioxa-8-azaspiro[4.5]decan-8-yl)-2-[(1R,2R)-1,2,3-trihydroxypropyl]-3,4-dihydro-2H-pyran-6-carboxylic acid	482468596	OCC(C(C1OC(=CC(C1NC(=O)C)N1CCC2(CC1)OCCO2)C(=O)O)O)O			CHEMBL2041484	1	0.535714	0.767857
2-Deoxy-2,3-dehydro-N-acetylneuraminic acid	1467904028		C04580	CHEMBL1161589,CHEMBL116550,CHEMBL291345,CHEMBL334952,CHEMBL416139,CHEMBL77627,CHEMBL96712	(2R,3R,4S)-3-acetamido-4-(2-chloroethylcarbamothioylamino)-2-[(1R,2R)-1,2,3-trihydroxypropyl]-3,4-dihydro-2H-pyran-6-carboxylic acid	482466738	ClCCNC(=S)NC1C=C(OC(C1NC(=O)C)C(C(CO)O)O)C(=O)O			CHEMBL2041299	1	0.535714	0.767857
2-Deoxy-2,3-dehydro-N-acetylneuraminic acid	1467904028		C04580	CHEMBL1161589,CHEMBL116550,CHEMBL291345,CHEMBL334952,CHEMBL416139,CHEMBL77627,CHEMBL96712	(2R,3R,4S)-3-acetamido-4-(3-carboxypropylamino)-2-[(1R,2R)-1,2,3-trihydroxypropyl]-3,4-dihydro-2H-pyran-6-carboxylic acid	299565737	OCC(C(C1OC(=CC(C1NC(=O)C)NCCCC(=O)O)C(=O)O)O)O			CHEMBL1164155	1	0.535714	0.767857
2-Deoxy-2,3-dehydro-N-acetylneuraminic acid	1467904028		C04580	CHEMBL1161589,CHEMBL116550,CHEMBL291345,CHEMBL334952,CHEMBL416139,CHEMBL77627,CHEMBL96712	(2R,3R,4S)-3-acetamido-4-(4-carboxybutylamino)-2-[(1R,2R)-1,2,3-trihydroxypropyl]-3,4-dihydro-2H-pyran-6-carboxylic acid	299565748	OCC(C(C1OC(=CC(C1NC(=O)C)NCCCCC(=O)O)C(=O)O)O)O			CHEMBL1165648	1	0.535714	0.767857
2-Deoxy-2,3-dehydro-N-acetylneuraminic acid	1467904028		C04580	CHEMBL1161589,CHEMBL116550,CHEMBL291345,CHEMBL334952,CHEMBL416139,CHEMBL77627,CHEMBL96712	(2R,3R,4S)-3-acetamido-4-(4-phenylpiperazin-1-yl)-2-[(1R,2R)-1,2,3-trihydroxypropyl]-3,4-dihydro-2H-pyran-6-carboxylic acid	482468607	OCC(C(C1OC(=CC(C1NC(=O)C)N1CCN(CC1)c1ccccc1)C(=O)O)O)O			CHEMBL2041485	1	0.535714	0.767857
2-Deoxy-2,3-dehydro-N-acetylneuraminic acid	1467904028		C04580	CHEMBL1161589,CHEMBL116550,CHEMBL291345,CHEMBL334952,CHEMBL416139,CHEMBL77627,CHEMBL96712	(2R,3R,4S)-3-acetamido-4-(4-phenyltriazol-1-yl)-2-[(1R,2R)-1,2,3-trihydroxypropyl]-3,4-dihydro-2H-pyran-6-carboxylic acid	280195626	OCC(C(C1OC(=CC(C1NC(=O)C)n1nnc(c1)c1ccccc1)C(=O)O)O)O			CHEMBL213310	1	0.535714	0.767857
2-Deoxy-2,3-dehydro-N-acetylneuraminic acid	1467904028		C04580	CHEMBL1161589,CHEMBL116550,CHEMBL291345,CHEMBL334952,CHEMBL416139,CHEMBL77627,CHEMBL96712	(2R,3R,4S)-3-acetamido-4-(butylcarbamothioylamino)-2-[(1R,2R)-1,2,3-trihydroxypropyl]-3,4-dihydro-2H-pyran-6-carboxylic acid	482466749	CCCCNC(=S)NC1C=C(OC(C1NC(=O)C)C(C(CO)O)O)C(=O)O			CHEMBL2041300	1	0.535714	0.767857
2-Deoxy-2,3-dehydro-N-acetylneuraminic acid	1467904028		C04580	CHEMBL1161589,CHEMBL116550,CHEMBL291345,CHEMBL334952,CHEMBL416139,CHEMBL77627,CHEMBL96712	(2R,3R,4S)-3-acetamido-4-(p-tolylcarbamoylamino)-2-[(1R,2R)-1,2,3-trihydroxypropyl]-3,4-dihydro-2H-pyran-6-carboxylic acid	482461259	OCC(C(C1OC(=CC(C1NC(=O)C)NC(=O)Nc1ccc(cc1)C)C(=O)O)O)O			CHEMBL2041284	1	0.535714	0.767857
2-Deoxy-2,3-dehydro-N-acetylneuraminic acid	1467904028		C04580	CHEMBL1161589,CHEMBL116550,CHEMBL291345,CHEMBL334952,CHEMBL416139,CHEMBL77627,CHEMBL96712	(2R,3R,4S)-3-acetamido-4-[(2-bromophenyl)carbamothioylamino]-2-[(1R,2R)-1,2,3-trihydroxypropyl]-3,4-dihydro-2H-pyran-6-carboxylic acid	482466705	OCC(C(C1OC(=CC(C1NC(=O)C)NC(=S)Nc1ccccc1Br)C(=O)O)O)O			CHEMBL2041296	1	0.535714	0.767857
2-Deoxy-2,3-dehydro-N-acetylneuraminic acid	1467904028		C04580	CHEMBL1161589,CHEMBL116550,CHEMBL291345,CHEMBL334952,CHEMBL416139,CHEMBL77627,CHEMBL96712	(2R,3R,4S)-3-acetamido-4-[(2-methoxyphenyl)carbamothioylamino]-2-[(1R,2R)-1,2,3-trihydroxypropyl]-3,4-dihydro-2H-pyran-6-carboxylic acid	482466694	OCC(C(C1OC(=CC(C1NC(=O)C)NC(=S)Nc1ccccc1OC)C(=O)O)O)O			CHEMBL2041295	1	0.535714	0.767857
2-Deoxy-2,3-dehydro-N-acetylneuraminic acid	1467904028		C04580	CHEMBL1161589,CHEMBL116550,CHEMBL291345,CHEMBL334952,CHEMBL416139,CHEMBL77627,CHEMBL96712	(2R,3R,4S)-3-acetamido-4-[(3-methoxyphenyl)carbamothioylamino]-2-[(1R,2R)-1,2,3-trihydroxypropyl]-3,4-dihydro-2H-pyran-6-carboxylic acid	482466055	OCC(C(C1OC(=CC(C1NC(=O)C)NC(=S)Nc1cccc(c1)OC)C(=O)O)O)O			CHEMBL2041293	1	0.535714	0.767857
2-Deoxy-2,3-dehydro-N-acetylneuraminic acid	1467904028		C04580	CHEMBL1161589,CHEMBL116550,CHEMBL291345,CHEMBL334952,CHEMBL416139,CHEMBL77627,CHEMBL96712	(2R,3R,4S)-3-acetamido-4-[(4-chlorophenyl)carbamoylamino]-2-[(1R,2R)-1,2,3-trihydroxypropyl]-3,4-dihydro-2H-pyran-6-carboxylic acid	482461270	OCC(C(C1OC(=CC(C1NC(=O)C)NC(=O)Nc1ccc(cc1)Cl)C(=O)O)O)O			CHEMBL2041285	1	0.535714	0.767857
2-Deoxy-2,3-dehydro-N-acetylneuraminic acid	1467904028		C04580	CHEMBL1161589,CHEMBL116550,CHEMBL291345,CHEMBL334952,CHEMBL416139,CHEMBL77627,CHEMBL96712	(2R,3R,4S)-3-acetamido-4-[(4-fluorophenyl)carbamoylamino]-2-[(1R,2R)-1,2,3-trihydroxypropyl]-3,4-dihydro-2H-pyran-6-carboxylic acid	482461281	OCC(C(C1OC(=CC(C1NC(=O)C)NC(=O)Nc1ccc(cc1)F)C(=O)O)O)O			CHEMBL2041286	1	0.535714	0.767857
2-Deoxy-2,3-dehydro-N-acetylneuraminic acid	1467904028		C04580	CHEMBL1161589,CHEMBL116550,CHEMBL291345,CHEMBL334952,CHEMBL416139,CHEMBL77627,CHEMBL96712	(2R,3R,4S)-3-acetamido-4-[(4-methoxyphenyl)carbamoylamino]-2-[(1R,2R)-1,2,3-trihydroxypropyl]-3,4-dihydro-2H-pyran-6-carboxylic acid	482461990	OCC(C(C1OC(=CC(C1NC(=O)C)NC(=O)Nc1ccc(cc1)OC)C(=O)O)O)O			CHEMBL2041287	1	0.535714	0.767857
2-Deoxy-2,3-dehydro-N-acetylneuraminic acid	1467904028		C04580	CHEMBL1161589,CHEMBL116550,CHEMBL291345,CHEMBL334952,CHEMBL416139,CHEMBL77627,CHEMBL96712	(2R,3R,4S)-3-acetamido-4-[[(1R)-3-amino-1-carboxy-3-oxo-propyl]carbamoylamino]-2-[(1R,2R)-1,2,3-trihydroxypropyl]-3,4-dihydro-2H-pyran-6-carboxylic acid	525177483	OCC(C(C1OC(=CC(C1NC(=O)C)NC(=O)NC(C(=O)O)CC(=O)N)C(=O)O)O)O			CHEMBL2040857,CHEMBL2041478	1	0.535714	0.767857
2-Deoxy-2,3-dehydro-N-acetylneuraminic acid	1467904028		C04580	CHEMBL1161589,CHEMBL116550,CHEMBL291345,CHEMBL334952,CHEMBL416139,CHEMBL77627,CHEMBL96712	(2R,3R,4S)-3-acetamido-4-[[(1S)-1-carboxyethyl]carbamoylamino]-2-[(1R,2R)-1,2,3-trihydroxypropyl]-3,4-dihydro-2H-pyran-6-carboxylic acid	525177395	OCC(C(C1OC(=CC(C1NC(=O)C)NC(=O)NC(C(=O)O)C)C(=O)O)O)O			CHEMBL2041303	1	0.535714	0.767857
2-Deoxy-2,3-dehydro-N-acetylneuraminic acid	1467904028		C04580	CHEMBL1161589,CHEMBL116550,CHEMBL291345,CHEMBL334952,CHEMBL416139,CHEMBL77627,CHEMBL96712	(2R,3R,4S)-3-acetamido-4-[[2-(carboxymethylamino)-2-oxo-ethyl]carbamoylamino]-2-[(1R,2R)-1,2,3-trihydroxypropyl]-3,4-dihydro-2H-pyran-6-carboxylic acid	525112734	OCC(C(C1OC(=CC(C1NC(=O)C)NC(=O)NCC(=O)NCC(=O)O)C(=O)O)O)O			CHEMBL2041480	1	0.535714	0.767857
2-Deoxy-2,3-dehydro-N-acetylneuraminic acid	1467904028		C04580	CHEMBL1161589,CHEMBL116550,CHEMBL291345,CHEMBL334952,CHEMBL416139,CHEMBL77627,CHEMBL96712	(2R,3R,4S)-3-acetamido-4-[[3-(trifluoromethyl)phenyl]carbamothioylamino]-2-[(1R,2R)-1,2,3-trihydroxypropyl]-3,4-dihydro-2H-pyran-6-carboxylic acid	482462045	OCC(C(C1OC(=CC(C1NC(=O)C)NC(=S)Nc1cccc(c1)C(F)(F)F)C(=O)O)O)O			CHEMBL2041292	1	0.535714	0.767857
2-Deoxy-2,3-dehydro-N-acetylneuraminic acid	1467904028		C04580	CHEMBL1161589,CHEMBL116550,CHEMBL291345,CHEMBL334952,CHEMBL416139,CHEMBL77627,CHEMBL96712	(2R,3R,4S)-3-acetamido-4-[[4-(trifluoromethyl)phenyl]carbamothioylamino]-2-[(1R,2R)-1,2,3-trihydroxypropyl]-3,4-dihydro-2H-pyran-6-carboxylic acid	482462034	OCC(C(C1OC(=CC(C1NC(=O)C)NC(=S)Nc1ccc(cc1)C(F)(F)F)C(=O)O)O)O			CHEMBL2041291	1	0.535714	0.767857
2-Deoxy-2,3-dehydro-N-acetylneuraminic acid	1467904028		C04580	CHEMBL1161589,CHEMBL116550,CHEMBL291345,CHEMBL334952,CHEMBL416139,CHEMBL77627,CHEMBL96712	(2R,3R,4S)-3-acetamido-4-[[amino(3-aminopropylimino)methyl]amino]-2-[(1R,2R)-1,2,3-trihydroxypropyl]-3,4-dihydro-2H-pyran-6-carboxylic acid	299565770	NCCCN=C(NC1C=C(OC(C1NC(=O)C)C(C(CO)O)O)C(=O)O)N			CHEMBL1164408	1	0.535714	0.767857
Zanamivir	1467931432		C08095,D00902	CHEMBL127235,CHEMBL1357654,CHEMBL157939,CHEMBL1673195,CHEMBL174747,CHEMBL193303,CHEMBL222813,CHEMBL300502,CHEMBL3348924	(2R,3R,4S)-3-acetamido-4-[[amino(3-aminopropylimino)methyl]amino]-2-[(1R,2R)-1,2,3-trihydroxypropyl]-3,4-dihydro-2H-pyran-6-carboxylic acid	299565770	NCCCN=C(NC1C=C(OC(C1NC(=O)C)C(C(CO)O)O)C(=O)O)N			CHEMBL1164408	1	0.535714	0.767857
2-Deoxy-2,3-dehydro-N-acetylneuraminic acid	1467904028		C04580	CHEMBL1161589,CHEMBL116550,CHEMBL291345,CHEMBL334952,CHEMBL416139,CHEMBL77627,CHEMBL96712	(2R,3R,4S)-3-acetamido-4-[4-(2-pyridyl)triazol-1-yl]-2-[(1R,2R)-1,2,3-trihydroxypropyl]-3,4-dihydro-2H-pyran-6-carboxylic acid	280197842	OCC(C(C1OC(=CC(C1NC(=O)C)n1nnc(c1)c1ccccn1)C(=O)O)O)O			CHEMBL387014	1	0.535714	0.767857
2-Deoxy-2,3-dehydro-N-acetylneuraminic acid	1467904028		C04580	CHEMBL1161589,CHEMBL116550,CHEMBL291345,CHEMBL334952,CHEMBL416139,CHEMBL77627,CHEMBL96712	(2R,3R,4S)-3-acetamido-4-[4-(4-ethylphenyl)triazol-1-yl]-2-[(1R,2R)-1,2,3-trihydroxypropyl]-3,4-dihydro-2H-pyran-6-carboxylic acid	280196064	OCC(C(C1OC(=CC(C1NC(=O)C)n1nnc(c1)c1ccc(cc1)CC)C(=O)O)O)O			CHEMBL379965	1	0.535714	0.767857
2-Deoxy-2,3-dehydro-N-acetylneuraminic acid	1467904028		C04580	CHEMBL1161589,CHEMBL116550,CHEMBL291345,CHEMBL334952,CHEMBL416139,CHEMBL77627,CHEMBL96712	(2R,3R,4S)-3-acetamido-4-[4-(4-phenylphenyl)triazol-1-yl]-2-[(1R,2R)-1,2,3-trihydroxypropyl]-3,4-dihydro-2H-pyran-6-carboxylic acid	280195427	OCC(C(C1OC(=CC(C1NC(=O)C)n1nnc(c1)c1ccc(cc1)c1ccccc1)C(=O)O)O)O			CHEMBL425790	1	0.535714	0.767857
2-Deoxy-2,3-dehydro-N-acetylneuraminic acid	1467904028		C04580	CHEMBL1161589,CHEMBL116550,CHEMBL291345,CHEMBL334952,CHEMBL416139,CHEMBL77627,CHEMBL96712	(2R,3R,4S)-3-acetamido-4-[4-(aminomethyl)triazol-1-yl]-2-[(1R,2R)-1,2,3-trihydroxypropyl]-3,4-dihydro-2H-pyran-6-carboxylic acid	280195703	OCC(C(C1OC(=CC(C1NC(=O)C)n1nnc(c1)CN)C(=O)O)O)O			CHEMBL377645	1	0.535714	0.767857
2-Deoxy-2,3-dehydro-N-acetylneuraminic acid	1467904028		C04580	CHEMBL1161589,CHEMBL116550,CHEMBL291345,CHEMBL334952,CHEMBL416139,CHEMBL77627,CHEMBL96712	(2R,3R,4S)-3-acetamido-4-[4-(morpholinomethyl)triazol-1-yl]-2-[(1R,2R)-1,2,3-trihydroxypropyl]-3,4-dihydro-2H-pyran-6-carboxylic acid	280195692	OCC(C(C1OC(=CC(C1NC(=O)C)n1nnc(c1)CN1CCOCC1)C(=O)O)O)O			CHEMBL212337	1	0.535714	0.767857
2-Deoxy-2,3-dehydro-N-acetylneuraminic acid	1467904028		C04580	CHEMBL1161589,CHEMBL116550,CHEMBL291345,CHEMBL334952,CHEMBL416139,CHEMBL77627,CHEMBL96712	(2R,3R,4S)-3-acetamido-4-[4-(phenoxymethyl)triazol-1-yl]-2-[(1R,2R)-1,2,3-trihydroxypropyl]-3,4-dihydro-2H-pyran-6-carboxylic acid	280195438	OCC(C(C1OC(=CC(C1NC(=O)C)n1nnc(c1)COc1ccccc1)C(=O)O)O)O			CHEMBL215612	1	0.535714	0.767857
Zanamivir	1467931432		C08095,D00902	CHEMBL127235,CHEMBL1357654,CHEMBL157939,CHEMBL1673195,CHEMBL174747,CHEMBL193303,CHEMBL222813,CHEMBL300502,CHEMBL3348924	(2R,3R,4S)-3-acetamido-4-[carbamimidoyl-(4-morpholino-4-oxo-butyl)amino]-2-[(1R,2R)-1,2,3-trihydroxypropyl]-3,4-dihydro-2H-pyran-6-carboxylic acid	299566514	OCC(C(C1OC(=CC(C1NC(=O)C)N(C(=N)N)CCCC(=O)N1CCOCC1)C(=O)O)O)O			CHEMBL1164661	1	0.535714	0.767857
Zanamivir	1467931432		C08095,D00902	CHEMBL127235,CHEMBL1357654,CHEMBL157939,CHEMBL1673195,CHEMBL174747,CHEMBL193303,CHEMBL222813,CHEMBL300502,CHEMBL3348924	(2R,3R,4S)-3-acetamido-4-[carbamimidoyl-[4-oxo-4-(1-piperidyl)butyl]amino]-2-[(1R,2R)-1,2,3-trihydroxypropyl]-3,4-dihydro-2H-pyran-6-carboxylic acid	299566525	OCC(C(C1OC(=CC(C1NC(=O)C)N(C(=N)N)CCCC(=O)N1CCCCC1)C(=O)O)O)O			CHEMBL1164662	1	0.535714	0.767857
2-Deoxy-2,3-dehydro-N-acetylneuraminic acid	1467904028		C04580	CHEMBL1161589,CHEMBL116550,CHEMBL291345,CHEMBL334952,CHEMBL416139,CHEMBL77627,CHEMBL96712	(2R,3R,4S)-3-acetamido-4-[carbamimidoyl(3-carboxypropyl)amino]-2-[(1R,2R)-1,2,3-trihydroxypropyl]-3,4-dihydro-2H-pyran-6-carboxylic acid	299566183	OCC(C(C1OC(=CC(C1NC(=O)C)N(C(=N)N)CCCC(=O)O)C(=O)O)O)O			CHEMBL1164186	1	0.535714	0.767857
Zanamivir	1467931432		C08095,D00902	CHEMBL127235,CHEMBL1357654,CHEMBL157939,CHEMBL1673195,CHEMBL174747,CHEMBL193303,CHEMBL222813,CHEMBL300502,CHEMBL3348924	(2R,3R,4S)-3-acetamido-4-[carbamimidoyl(3-carboxypropyl)amino]-2-[(1R,2R)-1,2,3-trihydroxypropyl]-3,4-dihydro-2H-pyran-6-carboxylic acid	299566183	OCC(C(C1OC(=CC(C1NC(=O)C)N(C(=N)N)CCCC(=O)O)C(=O)O)O)O			CHEMBL1164186	1	0.535714	0.767857
Zanamivir	1467931432		C08095,D00902	CHEMBL127235,CHEMBL1357654,CHEMBL157939,CHEMBL1673195,CHEMBL174747,CHEMBL193303,CHEMBL222813,CHEMBL300502,CHEMBL3348924	(2R,3R,4S)-3-acetamido-4-guanidino-N-(p-tolylmethyl)-2-[(1R,2R)-1,2,3-trihydroxypropyl]-3,4-dihydro-2H-pyran-6-carboxamide	482194618	OCC(C(C1OC(=CC(C1NC(=O)C)N=C(N)N)C(=O)NCc1ccc(cc1)C)O)O			CHEMBL2315596	1	0.535714	0.767857
2-Deoxy-2,3-dehydro-N-acetylneuraminic acid	1467904028		C04580	CHEMBL1161589,CHEMBL116550,CHEMBL291345,CHEMBL334952,CHEMBL416139,CHEMBL77627,CHEMBL96712	(2R,3R,4S)-3-acetamido-4-hydroxy-N-[(4-methoxyphenyl)methyl]-2-[(1R,2R)-1,2,3-trihydroxypropyl]-3,4-dihydro-2H-pyran-6-carboxamide	534494448	OCC(C(C1OC(=CC(C1NC(=O)C)O)C(=O)NCc1ccc(cc1)OC)O)O			CHEMBL2315599	1	0.535714	0.767857
Zanamivir	1467931432		C08095,D00902	CHEMBL127235,CHEMBL1357654,CHEMBL157939,CHEMBL1673195,CHEMBL174747,CHEMBL193303,CHEMBL222813,CHEMBL300502,CHEMBL3348924	(2R,3R,4S)-3-acetamido-N-[(2-fluorophenyl)methyl]-4-guanidino-2-[(1R,2R)-1,2,3-trihydroxypropyl]-3,4-dihydro-2H-pyran-6-carboxamide	482198736	OCC(C(C1OC(=CC(C1NC(=O)C)N=C(N)N)C(=O)NCc1ccccc1F)O)O			CHEMBL2315324	1	0.535714	0.767857
Zanamivir	1467931432		C08095,D00902	CHEMBL127235,CHEMBL1357654,CHEMBL157939,CHEMBL1673195,CHEMBL174747,CHEMBL193303,CHEMBL222813,CHEMBL300502,CHEMBL3348924	(2R,3R,4S)-3-acetamido-N-[(3-fluorophenyl)methyl]-4-guanidino-2-[(1R,2R)-1,2,3-trihydroxypropyl]-3,4-dihydro-2H-pyran-6-carboxamide	482196640	OCC(C(C1OC(=CC(C1NC(=O)C)N=C(N)N)C(=O)NCc1cccc(c1)F)O)O			CHEMBL2315323	1	0.535714	0.767857
Zanamivir	1467931432		C08095,D00902	CHEMBL127235,CHEMBL1357654,CHEMBL157939,CHEMBL1673195,CHEMBL174747,CHEMBL193303,CHEMBL222813,CHEMBL300502,CHEMBL3348924	(2R,3R,4S)-3-acetamido-N-[(4-fluorophenyl)methyl]-4-guanidino-2-[(1R,2R)-1,2,3-trihydroxypropyl]-3,4-dihydro-2H-pyran-6-carboxamide	482196629	OCC(C(C1OC(=CC(C1NC(=O)C)N=C(N)N)C(=O)NCc1ccc(cc1)F)O)O			CHEMBL2315597	1	0.535714	0.767857
2-Deoxy-2,3-dehydro-N-acetylneuraminic acid	1467904028		C04580	CHEMBL1161589,CHEMBL116550,CHEMBL291345,CHEMBL334952,CHEMBL416139,CHEMBL77627,CHEMBL96712	(2R,3R,4S)-3-acetamido-N-benzyl-4-hydroxy-2-[(1R,2R)-1,2,3-trihydroxypropyl]-3,4-dihydro-2H-pyran-6-carboxamide	534495718	OCC(C(C1OC(=CC(C1NC(=O)C)O)C(=O)NCc1ccccc1)O)O			CHEMBL2315605	1	0.535714	0.767857
1,6-Anhydro-N-acetyl-beta-muramate	1468040223		C19769		(2R)-2-[[(1R,2S,3S,4R,5R)-4-acetamido-2-hydroxy-6,8-dioxabicyclo[3.2.1]octan-3-yl]oxy]-N-(4-acetylphenyl)propanamide	337060967	CC(=O)NC1C2OCC(O2)C(C1OC(C(=O)Nc1ccc(cc1)C(=O)C)C)O			CHEMBL1271680	1	0.535714	0.767857
1,6-Anhydro-N-acetyl-beta-muramate	1468040223		C19769		(2R)-2-[[(1R,2S,3S,4R,5R)-4-acetamido-2-hydroxy-6,8-dioxabicyclo[3.2.1]octan-3-yl]oxy]-N-[4-(trifluoromethyl)phenyl]propanamide	337049284	CC(=O)NC1C2OCC(O2)C(C1OC(C(=O)Nc1ccc(cc1)C(F)(F)F)C)O			CHEMBL1271732	1	0.535714	0.767857
1,6-Anhydro-N-acetyl-beta-muramate	1468040223		C19769		(2R)-2-[[(1R,2S,3S,4R,5R)-4-acetamido-2-hydroxy-6,8-dioxabicyclo[3.2.1]octan-3-yl]oxy]-N-phenylpropanamide	337073489	CC(=O)NC1C2OCC(O2)C(C1OC(C(=O)Nc1ccccc1)C)O			CHEMBL1271679	1	0.535714	0.767857
UDPMurNAc(oyl-L-Ala-D-gamma-Glu-L-Lys-D-Ala-D-Ala)	1467904958		C04702		(2R)-2-[[(2S)-2-[[(2R)-2-[[(2R,3S,4R,5R,6R)-5-acetamido-3-hydroxy-2-(hydroxymethyl)-6-methoxy-4-oxanyl]oxy]-1-oxopropyl]amino]-1-oxopropyl]amino]-5-[[(2S)-6-amino-1-[[(2R)-1-[[(1R)-1-carboxyethyl]amino]-1-oxopropan-2-yl]amino]-1-oxohexan-2-yl]amino]-5-oxopentanoic acid	278548959	NCCCCC(C(=O)NC(C(=O)NC(C(=O)O)C)C)NC(=O)CCC(C(=O)O)NC(=O)C(NC(=O)C(OC1C(O)C(CO)OC(C1NC(=O)C)OC)C)C			CHEMBL94097	1	0.535714	0.767857
UDPMurNAc(oyl-L-Ala-D-gamma-Glu-L-Lys-D-Ala-D-Ala)	1467904958		C04702		(2R)-2-[[(2S)-2-[[(2S)-2-[[5-acetamido-3-hydroxy-2-(hydroxymethyl)-6-phosphonooxy-4-oxanyl]oxy]-1-oxopropyl]amino]-1-oxopropyl]amino]-5-[[(2S)-6-amino-1-[[(2R)-1-[[(1R)-1-carboxyethyl]amino]-1-oxopropan-2-yl]amino]-1-oxohexan-2-yl]amino]-5-oxopentanoic acid	279388785	NCCCCC(C(=O)NC(C(=O)NC(C(=O)O)C)C)NC(=O)CCC(C(=O)O)NC(=O)C(NC(=O)C(OC1C(O)C(CO)OC(C1NC(=O)C)OP(=O)(O)O)C)C			CHEMBL430904	1	0.535714	0.767857
N-(4-sulfanylphenyl)acetamide	701957			ChEMBLE_NTD,CHEMBL120794	(2R)-3-[(4-acetamidophenyl)disulfanyl]-2-(oxaloamino)propanoic acid	525109746	CC(=O)Nc1ccc(cc1)SSCC(C(=O)O)NC(=O)C(=O)O			CHEMBL2030710	1	0.535714	0.767857
4-Deoxy-beta-D-gluc-4-enuronosyl-(1,3)-N-acetyl-D-galactosamine	1467879665		C01310,C04794	ChEMBLE_NTD	(2S,3S,4R,5R,6R)-3-[[(2S,3R,4R,5S,6R)-3-acetamido-4,5-dihydroxy-6-(hydroxymethyl)-2-oxanyl]oxy]-4,5-dihydroxy-6-methoxy-2-oxanecarboxylic acid	2987045	COC1OC(C(=O)O)C(C(C1O)O)OC1OC(CO)C(C(C1NC(=O)C)O)O			ChEMBLE_NTD	1	0.535714	0.767857
N-Acetyl-D-glucosamine 1-phosphate	1467901708		C04256,C04501,C18055,C18060		(2S,3S,4R,5R,6R)-3-[[(2S,3R,4R,5S,6R)-3-acetamido-4,5-dihydroxy-6-(hydroxymethyl)-2-oxanyl]oxy]-4,5-dihydroxy-6-methoxy-2-oxanecarboxylic acid	2987045	COC1OC(C(=O)O)C(C(C1O)O)OC1OC(CO)C(C(C1NC(=O)C)O)O			ChEMBLE_NTD	1	0.535714	0.767857
N-Acetyl-D-mannosamine	1468065130		C00645	CHEMBL3182062	(2S,3S,4R,5R,6R)-3-[[(2S,3R,4R,5S,6R)-3-acetamido-4,5-dihydroxy-6-(hydroxymethyl)-2-oxanyl]oxy]-4,5-dihydroxy-6-methoxy-2-oxanecarboxylic acid	2987045	COC1OC(C(=O)O)C(C(C1O)O)OC1OC(CO)C(C(C1NC(=O)C)O)O			ChEMBLE_NTD	1	0.535714	0.767857
2-Deoxy-2,3-dehydro-N-acetylneuraminic acid	1467904028		C04580	CHEMBL1161589,CHEMBL116550,CHEMBL291345,CHEMBL334952,CHEMBL416139,CHEMBL77627,CHEMBL96712	(2S,3S)-2-[[(2R,3R,4S)-3-acetamido-4-hydroxy-2-[(1R,2R)-1,2,3-trihydroxypropyl]-3,4-dihydro-2H-pyran-6-carbonyl]amino]-3-methyl-pentanoic acid	534494470	CCC(C(C(=O)O)NC(=O)C1=CC(C(C(O1)C(C(CO)O)O)NC(=O)C)O)C			CHEMBL2315601	1	0.535714	0.767857
2-Deoxy-2,3-dehydro-N-acetylneuraminic acid	1467904028		C04580	CHEMBL1161589,CHEMBL116550,CHEMBL291345,CHEMBL334952,CHEMBL416139,CHEMBL77627,CHEMBL96712	(2S)-1-[[(2R,3R,4S)-3-acetamido-6-carboxy-2-[(1R,2R)-1,2,3-trihydroxypropyl]-3,4-dihydro-2H-pyran-4-yl]carbamoyl]pyrrolidine-2-carboxylic acid	525241887	OCC(C(C1OC(=CC(C1NC(=O)C)NC(=O)N1CCCC1C(=O)O)C(=O)O)O)O			CHEMBL2041476	1	0.535714	0.767857
Zanamivir	1467931432		C08095,D00902	CHEMBL127235,CHEMBL1357654,CHEMBL157939,CHEMBL1673195,CHEMBL174747,CHEMBL193303,CHEMBL222813,CHEMBL300502,CHEMBL3348924	(2S)-2-[[(2R,3R,4S)-3-acetamido-4-guanidino-2-[(1R,2R)-1,2,3-trihydroxypropyl]-3,4-dihydro-2H-pyran-6-carbonyl]amino]-3-methyl-butanoic acid	534484323	OCC(C(C1OC(=CC(C1NC(=O)C)N=C(N)N)C(=O)NC(C(=O)O)C(C)C)O)O			CHEMBL2315320	1	0.535714	0.767857
Zanamivir	1467931432		C08095,D00902	CHEMBL127235,CHEMBL1357654,CHEMBL157939,CHEMBL1673195,CHEMBL174747,CHEMBL193303,CHEMBL222813,CHEMBL300502,CHEMBL3348924	(2S)-2-[[(2R,3R,4S)-3-acetamido-4-guanidino-2-[(1R,2R)-1,2,3-trihydroxypropyl]-3,4-dihydro-2H-pyran-6-carbonyl]amino]-4-methyl-pentanoic acid	534484301	OCC(C(C1OC(=CC(C1NC(=O)C)N=C(N)N)C(=O)NC(C(=O)O)CC(C)C)O)O			CHEMBL2315319	1	0.535714	0.767857
2-Deoxy-2,3-dehydro-N-acetylneuraminic acid	1467904028		C04580	CHEMBL1161589,CHEMBL116550,CHEMBL291345,CHEMBL334952,CHEMBL416139,CHEMBL77627,CHEMBL96712	(2S)-2-[[(2R,3R,4S)-3-acetamido-4-hydroxy-2-[(1R,2R)-1,2,3-trihydroxypropyl]-3,4-dihydro-2H-pyran-6-carbonyl]amino]-2-phenyl-acetic acid	534495696	OCC(C(C1OC(=CC(C1NC(=O)C)O)C(=O)NC(c1ccccc1)C(=O)O)O)O			CHEMBL2315603	1	0.535714	0.767857
2-Deoxy-2,3-dehydro-N-acetylneuraminic acid	1467904028		C04580	CHEMBL1161589,CHEMBL116550,CHEMBL291345,CHEMBL334952,CHEMBL416139,CHEMBL77627,CHEMBL96712	(2S)-2-[[(2R,3R,4S)-3-acetamido-4-hydroxy-2-[(1R,2R)-1,2,3-trihydroxypropyl]-3,4-dihydro-2H-pyran-6-carbonyl]amino]-4-methyl-pentanoic acid	534494459	OCC(C(C1OC(=CC(C1NC(=O)C)O)C(=O)NC(C(=O)O)CC(C)C)O)O			CHEMBL2315600	1	0.535714	0.767857
N-Acetyl-D-mannosamine	1468065130		C00645	CHEMBL3182062	(2S)-2-[[(2R,3S,4R,5R,6S)-5-acetamido-4,6-dihydroxy-2-(hydroxymethyl)-3-oxanyl]oxy]propanoic acid	2987096	OCC1OC(O)C(C(C1OC(C(=O)O)C)O)NC(=O)C			ChEMBLE_NTD	1	0.535714	0.767857
N-Acetylmuramate	1467890798		C02713	ChEMBLE_NTD,CHEMBL1597841	(2S)-2-[[(2S)-2-[[2-[[(2S,3R,4R,5S,6R)-3-acetamido-2,5-dihydroxy-6-(hydroxymethyl)-4-oxanyl]oxy]-1-oxopropyl]amino]-1-oxopropyl]amino]-5-amino-5-oxopentanoic acid	2941080	OCC1OC(O)C(C(C1O)OC(C(=O)NC(C(=O)NC(C(=O)O)CCC(=O)N)C)C)NC(=O)C			CHEMBL163951,CHEMBL170302	1	0.535714	0.767857
N-Acetylmuramoyl-Ala	1467892918		C02999		(2S)-2-[[(2S)-2-[[2-[[(2S,3R,4R,5S,6R)-3-acetamido-2,5-dihydroxy-6-(hydroxymethyl)-4-oxanyl]oxy]-1-oxopropyl]amino]-1-oxopropyl]amino]-5-amino-5-oxopentanoic acid	2941080	OCC1OC(O)C(C(C1O)OC(C(=O)NC(C(=O)NC(C(=O)O)CCC(=O)N)C)C)NC(=O)C			CHEMBL163951,CHEMBL170302	1	0.535714	0.767857
L-Alanyl-gamma-D-glutamyl-L-lysine	1468050677		C21160		(2S)-2-[[(4R)-4-[[(2S)-2-[[(2R)-2-[[(3R,4R,5S,6R)-3-acetamido-2,5-dihydroxy-6-(hydroxymethyl)-4-oxanyl]oxy]-1-oxopropyl]amino]-1-oxopropyl]amino]-4-carboxy-1-oxobutyl]amino]-6-aminohexanoic acid	107833597	NCCCCC(C(=O)O)NC(=O)CCC(C(=O)O)NC(=O)C(NC(=O)C(OC1C(O)C(CO)OC(C1NC(=O)C)O)C)C			CHEMBL1779326	1	0.535714	0.767857
N-Acetylmuramate	1467890798		C02713	ChEMBLE_NTD,CHEMBL1597841	(2S)-2-[[(4R)-4-[[(2S)-2-[[(2R)-2-[[(3R,4R,5S,6R)-3-acetamido-2,5-dihydroxy-6-(hydroxymethyl)-4-oxanyl]oxy]-1-oxopropyl]amino]-1-oxopropyl]amino]-4-carboxy-1-oxobutyl]amino]-6-aminohexanoic acid	107833597	NCCCCC(C(=O)O)NC(=O)CCC(C(=O)O)NC(=O)C(NC(=O)C(OC1C(O)C(CO)OC(C1NC(=O)C)O)C)C			CHEMBL1779326	1	0.535714	0.767857
N-Acetylmuramoyl-Ala	1467892918		C02999		(2S)-2-[[(4R)-4-[[(2S)-2-[[(2R)-2-[[(3R,4R,5S,6R)-3-acetamido-2,5-dihydroxy-6-(hydroxymethyl)-4-oxanyl]oxy]-1-oxopropyl]amino]-1-oxopropyl]amino]-4-carboxy-1-oxobutyl]amino]-6-aminohexanoic acid	107833597	NCCCCC(C(=O)O)NC(=O)CCC(C(=O)O)NC(=O)C(NC(=O)C(OC1C(O)C(CO)OC(C1NC(=O)C)O)C)C			CHEMBL1779326	1	0.535714	0.767857
methyl N-acetyl-alpha-D-galactosaminide	1468161852	DB02612,DB04426,EXPT02108			(3R,5S,6R)-5-acetamido-3,4-dihydroxy-6-methoxy-2-oxanecarboxylic acid	279204752	COC1OC(C(=O)O)C(C(C1NC(=O)C)O)O			CHEMBL1160333	1	0.535714	0.767857
N-Acetylgalactosaminate	1467895858		C03408		(3R,5S,6R)-5-acetamido-3,4-dihydroxy-6-methoxy-2-oxanecarboxylic acid	279204752	COC1OC(C(=O)O)C(C(C1NC(=O)C)O)O			CHEMBL1160333	1	0.535714	0.767857
Acetaminophen	1467921436	APRD00252,DB00316	C06804,D00217	ChEMBLE_NTD,CHEMBL112	(4-acetamidophenyl) (2S)-1-(2-aminoacetyl)pyrrolidine-2-carboxylate	279931490	NCC(=O)N1CCCC1C(=O)Oc1ccc(cc1)NC(=O)C			CHEMBL1181570	1	0.535714	0.767857
Gly-Pro	1469427310			CHEMBL80548	(4-acetamidophenyl) (2S)-1-(2-aminoacetyl)pyrrolidine-2-carboxylate	279931490	NCC(=O)N1CCCC1C(=O)Oc1ccc(cc1)NC(=O)C			CHEMBL1181570	1	0.535714	0.767857
Acetaminophen	1467921436	APRD00252,DB00316	C06804,D00217	ChEMBLE_NTD,CHEMBL112	(4-acetamidophenyl) (2S)-2-[(2-aminoacetyl)amino]-3-methyl-butanoate	279932040	NCC(=O)NC(C(=O)Oc1ccc(cc1)NC(=O)C)C(C)C			CHEMBL1181565	1	0.535714	0.767857
Acetaminophen	1467921436	APRD00252,DB00316	C06804,D00217	ChEMBLE_NTD,CHEMBL112	(4-acetamidophenyl) (2S)-2-aminopropanoate	374515286	CC(=O)Nc1ccc(cc1)OC(=O)C(N)C			CHEMBL1852827	1	0.535714	0.767857
Acetaminophen	1467921436	APRD00252,DB00316	C06804,D00217	ChEMBLE_NTD,CHEMBL112	(4-acetamidophenyl) (2S)-pyrrolidine-2-carboxylate	374664287	CC(=O)Nc1ccc(cc1)OC(=O)C1CCCN1			CHEMBL1851986	1	0.535714	0.767857
Acetaminophen	1467921436	APRD00252,DB00316	C06804,D00217	ChEMBLE_NTD,CHEMBL112	(4-acetamidophenyl) 2-(2,4-dioxothiazolidin-5-yl)acetate	7475565	CC(=O)Nc1ccc(cc1)OC(=O)CC1SC(=O)NC1=O			CHEMBL1549371	1	0.535714	0.767857
Acetaminophen	1467921436	APRD00252,DB00316	C06804,D00217	ChEMBLE_NTD,CHEMBL112	(4-acetamidophenyl) 2-(3-methylimidazol-3-ium-1-yl)acetate	623845330	CC(=O)Nc1ccc(cc1)OC(=O)Cn1cc[n+](c1)C			CHEMBL3305909	1	0.535714	0.767857
Acetaminophen	1467921436	APRD00252,DB00316	C06804,D00217	ChEMBLE_NTD,CHEMBL112	(4-acetamidophenyl) 2-(4-chlorophenyl)acetate	49111070	O=C(Cc1ccc(cc1)Cl)Oc1ccc(cc1)NC(=O)C			CHEMBL1421165	1	0.535714	0.767857
Acetaminophen	1467921436	APRD00252,DB00316	C06804,D00217	ChEMBLE_NTD,CHEMBL112	(4-acetamidophenyl) 2-(diethylamino)acetate	681704	CCN(CC(=O)Oc1ccc(cc1)NC(=O)C)CC	DB09288	D07294	CHEMBL1851805	1	0.535714	0.767857
N,N-Diethylglycine	1468012397		C16647		(4-acetamidophenyl) 2-(diethylamino)acetate	681704	CCN(CC(=O)Oc1ccc(cc1)NC(=O)C)CC	DB09288	D07294	CHEMBL1851805	1	0.535714	0.767857
Acetaminophen	1467921436	APRD00252,DB00316	C06804,D00217	ChEMBLE_NTD,CHEMBL112	(4-acetamidophenyl) 2-[(3-methylsulfanyl-1,2,4-thiadiazol-5-yl)sulfanyl]acetate	28709861	CSc1nsc(n1)SCC(=O)Oc1ccc(cc1)NC(=O)C			CHEMBL1491478	1	0.535714	0.767857
Acetaminophen	1467921436	APRD00252,DB00316	C06804,D00217	ChEMBLE_NTD,CHEMBL112	(4-acetamidophenyl) 2-[[(2S)-pyrrolidine-2-carbonyl]amino]acetate	279931765	CC(=O)Nc1ccc(cc1)OC(=O)CNC(=O)C1CCCN1			CHEMBL1181559	1	0.535714	0.767857
progly	1468096615			CHEMBL59426	(4-acetamidophenyl) 2-[[(2S)-pyrrolidine-2-carbonyl]amino]acetate	279931765	CC(=O)Nc1ccc(cc1)OC(=O)CNC(=O)C1CCCN1			CHEMBL1181559	1	0.535714	0.767857
Indomethacin	1467884759		C01926,D00141	ChEMBLE_NTD,CHEMBL6	(4-acetamidophenyl) 2-[1-(4-chlorobenzoyl)-5-methoxy-2-methyl-indol-3-yl]acetate	498953	COc1ccc2c(c1)c(CC(=O)Oc1ccc(cc1)NC(=O)C)c(n2C(=O)c1ccc(cc1)Cl)C			CHEMBL97562	1	0.535714	0.767857
Acetaminophen	1467921436	APRD00252,DB00316	C06804,D00217	ChEMBLE_NTD,CHEMBL112	(4-acetamidophenyl) 2,4,6-trimethylbenzenesulfonate	22013389	CC(=O)Nc1ccc(cc1)OS(=O)(=O)c1c(C)cc(cc1C)C			CHEMBL1563002	1	0.535714	0.767857
Acetaminophen	1467921436	APRD00252,DB00316	C06804,D00217	ChEMBLE_NTD,CHEMBL112	(4-acetamidophenyl) 3-(dimethylamino)propanoate	374490448	CN(CCC(=O)Oc1ccc(cc1)NC(=O)C)C			CHEMBL1851599	1	0.535714	0.767857
diphenyl(4-piperidyl)methanol	162000			ChEMBLE_NTD,CHEMBL127508	(4-acetamidophenyl) 4-[hydroxy(diphenyl)methyl]piperidine-1-carboxylate	525131483	CC(=O)Nc1ccc(cc1)OC(=O)N1CCC(CC1)C(c1ccccc1)(c1ccccc1)O			CHEMBL2030194	1	0.535714	0.767857
Acetaminophen	1467921436	APRD00252,DB00316	C06804,D00217	ChEMBLE_NTD,CHEMBL112	(4-acetamidophenyl) 4-ethoxybenzoate	9919049	CCOc1ccc(cc1)C(=O)Oc1ccc(cc1)NC(=O)C			CHEMBL1344219	1	0.535714	0.767857
Acetaminophen	1467921436	APRD00252,DB00316	C06804,D00217	ChEMBLE_NTD,CHEMBL112	(4-acetamidophenyl) furan-2-carboxylate	9012776	CC(=O)Nc1ccc(cc1)OC(=O)c1ccco1			CHEMBL1373799	1	0.535714	0.767857
Acetaminophen	1467921436	APRD00252,DB00316	C06804,D00217	ChEMBLE_NTD,CHEMBL112	(4-acetamidophenyl) N,N-diethylcarbamate	8232181	CCN(C(=O)Oc1ccc(cc1)NC(=O)C)CC			CHEMBL1380379	1	0.535714	0.767857
Acetaminophen	1467921436	APRD00252,DB00316	C06804,D00217	ChEMBLE_NTD,CHEMBL112	(4-acetamidophenyl) pyridine-3-carboxylate	31384819	CC(=O)Nc1ccc(cc1)OC(=O)c1cccnc1			CHEMBL1398893	1	0.535714	0.767857
Nicotinate	1467868908	APRD00536,DB00627,NUTR00042	C00253,D00049	ChEMBLE_NTD,CHEMBL573	(4-acetamidophenyl) pyridine-3-carboxylate	31384819	CC(=O)Nc1ccc(cc1)OC(=O)c1cccnc1			CHEMBL1398893	1	0.535714	0.767857
Acetaminophen	1467921436	APRD00252,DB00316	C06804,D00217	ChEMBLE_NTD,CHEMBL112	(4-acetamidophenyl) thiophene-2-carboxylate	2409517	CC(=O)Nc1ccc(cc1)OC(=O)c1cccs1			CHEMBL1370093	1	0.535714	0.767857
Echinocystic acid	1467940838		C08942	CHEMBL1395408,CHEMBL1559201,CHEMBL230128,CHEMBL464557	(4aR,5R,6aR,6aS,6bR,8aR,10S,12aR,14bS)-10-[[(2R,3R,4R,5S,6R)-3-acetamido-4,5-dihydroxy-6-[[(2S,3R,4S,5S)-3,4,5-trihydroxy-2-oxanyl]oxymethyl]-2-oxanyl]oxy]-5-hydroxy-2,2,6a,6b,9,9,12a-heptamethyl-1,3,4,5,6,6a,7,8,8a,10,11,12,13,14b-tetradecahydropicene-4a-carboxylic acid	125002119	CC(=O)NC1C(OC(C(C1O)O)COC1OCC(C(C1O)O)O)OC1CCC2(C(C1(C)C)CCC1(C2CC=C2C1(C)CC(C1(C2CC(C)(C)CC1)C(=O)O)O)C)C			CHEMBL1765595	1	0.535714	0.767857
Aridanin	1467940596		C08922	CHEMBL506209	(4aS,6aR,6aS,6bR,8aR,10S,12aR,14bR)-10-[[(2R,3R,4R,5S,6R)-3-acetamido-5-hydroxy-6-(hydroxymethyl)-4-[[(2R,3R,4S,5S,6R)-3,4,5-trihydroxy-6-(hydroxymethyl)-2-oxanyl]oxy]-2-oxanyl]oxy]-2,2,6a,6b,9,9,12a-heptamethyl-1,3,4,5,6,6a,7,8,8a,10,11,12,13,14b-tetradecahydropicene-4a-carboxylic acid	130080491	OCC1OC(OC2CCC3(C(C2(C)C)CCC2(C3CC=C3C2(C)CCC2(C3CC(C)(C)CC2)C(=O)O)C)C)C(C(C1O)OC1OC(CO)C(C(C1O)O)O)NC(=O)C			CHEMBL213497	1	0.535714	0.767857
Aridanin	1467940596		C08922	CHEMBL506209	(4aS,6aR,6aS,6bR,8aR,10S,12aR,14bS)-10-[[(2R,3R,4R,5S,6R)-3-acetamido-4,5-dihydroxy-6-[[(2S,3R,4S,5S)-3,4,5-trihydroxy-2-oxanyl]oxymethyl]-2-oxanyl]oxy]-2,2,6a,6b,9,9,12a-heptamethyl-1,3,4,5,6,6a,7,8,8a,10,11,12,13,14b-tetradecahydropicene-4a-carboxylic acid	105325636	CC(=O)NC1C(OC(C(C1O)O)COC1OCC(C(C1O)O)O)OC1CCC2(C(C1(C)C)CCC1(C2CC=C2C1(C)CCC1(C2CC(C)(C)CC1)C(=O)O)C)C			CHEMBL1765593	1	0.535714	0.767857
Aridanin	1467940596		C08922	CHEMBL506209	(4aS,6aS,6bR,10S,12aR)-10-[[(2R,3R,4R,5S,6R)-3-acetamido-6-[[(2S,3R,4S,5S)-4,5-dihydroxy-3-[[(2S,3R,4S,5S)-3,4,5-trihydroxy-2-oxanyl]oxy]-2-oxanyl]oxymethyl]-4,5-dihydroxy-2-oxanyl]oxy]-2,2,6a,6b,9,9,12a-heptamethyl-1,3,4,5,6,6a,7,8,8a,10,11,12,13,14b-tetradecahydropicene-4a-carboxylic acid	99569523	CC(=O)NC1C(OC(C(C1O)O)COC1OCC(C(C1OC1OCC(C(C1O)O)O)O)O)OC1CCC2(C(C1(C)C)CCC1(C2CC=C2C1(C)CCC1(C2CC(C)(C)CC1)C(=O)O)C)C			CHEMBL449880,CHEMBL499401	1	0.535714	0.767857
Oleanolic acid	1468017072		C17148	CHEMBL1413646,CHEMBL1436454,CHEMBL168,CHEMBL180553,CHEMBL365375,CHEMBL486382,CHEMBL56615	(4aS,6aS,6bR,10S,12aR)-10-[[(2R,3R,4R,5S,6R)-3-acetamido-6-[[(2S,3R,4S,5S)-4,5-dihydroxy-3-[[(2S,3R,4S,5S)-3,4,5-trihydroxy-2-oxanyl]oxy]-2-oxanyl]oxymethyl]-4,5-dihydroxy-2-oxanyl]oxy]-2,2,6a,6b,9,9,12a-heptamethyl-1,3,4,5,6,6a,7,8,8a,10,11,12,13,14b-tetradecahydropicene-4a-carboxylic acid	99569523	CC(=O)NC1C(OC(C(C1O)O)COC1OCC(C(C1OC1OCC(C(C1O)O)O)O)O)OC1CCC2(C(C1(C)C)CCC1(C2CC=C2C1(C)CCC1(C2CC(C)(C)CC1)C(=O)O)C)C			CHEMBL449880,CHEMBL499401	1	0.535714	0.767857
(5-acetamido-3,4-diacetoxy-6-benzyloxy-tetrahydropyran-2-yl)methyl acetate	6300311			ChEMBLE_NTD,CHEMBL1341094	[(2R,3R,4S,5S,6S)-5-acetamido-3,4-diacetoxy-6-[(3-bromophenyl)methoxy]tetrahydropyran-2-yl]methyl acetate	11537544	CC(=O)OCC1OC(OCc2cccc(c2)Br)C(C(C1OC(=O)C)OC(=O)C)NC(=O)C			CHEMBL1523650	1	0.535714	0.767857
(5-acetamido-3,4-diacetoxy-6-hydroxy-tetrahydropyran-2-yl)methyl acetate	6306075			ChEMBLE_NTD	[(2R,3R,4S,5S,6S)-5-acetamido-3,4-diacetoxy-6-[(3-bromophenyl)methoxy]tetrahydropyran-2-yl]methyl acetate	11537544	CC(=O)OCC1OC(OCc2cccc(c2)Br)C(C(C1OC(=O)C)OC(=O)C)NC(=O)C			CHEMBL1523650	1	0.535714	0.767857
(5-acetamido-3,4-diacetoxy-6-hydroxy-tetrahydropyran-2-yl)methyl acetate	6306075			ChEMBLE_NTD	[(2R,3S,4R,5R,6R)-5-acetamido-3,4-diacetoxy-6-[4-(bromomethyl)triazol-1-yl]tetrahydropyran-2-yl]methyl acetate	667148191	BrCc1nnn(c1)C1OC(COC(=O)C)C(C(C1NC(=O)C)OC(=O)C)OC(=O)C			CHEMBL3229474	1	0.535714	0.767857
(5-acetamido-3,4-diacetoxy-6-hydroxy-tetrahydropyran-2-yl)methyl acetate	6306075			ChEMBLE_NTD	[(2R,3S,4R,5R,6R)-5-acetamido-3,4-diacetoxy-6-[4-(chloromethyl)triazol-1-yl]tetrahydropyran-2-yl]methyl acetate	277481782	ClCc1nnn(c1)C1OC(COC(=O)C)C(C(C1NC(=O)C)OC(=O)C)OC(=O)C			CHEMBL3229473	1	0.535714	0.767857
(5-acetamido-3,4-diacetoxy-6-hydroxy-tetrahydropyran-2-yl)methyl acetate	6306075			ChEMBLE_NTD	[(2R,3S,4R,5R,6S)-5-acetamido-3,4-diacetoxy-6-(dimethylcarbamothioylsulfanyl)tetrahydropyran-2-yl]methyl acetate	286306531	CC(=O)OCC1OC(SC(=S)N(C)C)C(C(C1OC(=O)C)OC(=O)C)NC(=O)C			CHEMBL567261	1	0.535714	0.767857
Phosphatidylethanolamine	1469360212	DB01728,EXPT02544	C00350		[(2R)-3-[2-[[(2S)-2-[[(4R)-4-[[(2S)-2-[[(2R)-2-[(2R,3R,5S,6R)-3-acetamido-2,5-dihydroxy-6-(hydroxymethyl)tetrahydropyran-4-yl]oxypropanoyl]amino]propanoyl]amino]-5-amino-5-oxo-pentanoyl]amino]propanoyl]amino]ethoxy-hydroxy-phosphoryl]oxy-2-hexadecanoyloxy-propyl] hexadecanoate	54390062	CCCCCCCCCCCCCCCC(=O)OC(COP(=O)(OCCNC(=O)C(NC(=O)CCC(C(=O)N)NC(=O)C(NC(=O)C(OC1C(NC(=O)C)C(O)OC(C1O)CO)C)C)C)O)COC(=O)CCCCCCCCCCCCCCC			CHEMBL2111100	1	0.535714	0.767857
(5-acetamido-3,4-diacetoxy-6-hydroxy-tetrahydropyran-2-yl)methyl acetate	6306075			ChEMBLE_NTD	[(3S,5S,6R)-3-acetamido-4,5-diacetoxy-6-(acetoxymethyl)tetrahydropyran-2-yl] butanoate	213689362	CCCC(=O)OC1OC(COC(=O)C)C(C(C1NC(=O)C)OC(=O)C)OC(=O)C			CHEMBL492063	1	0.535714	0.767857
[2-(4-acetamido-3-acetoxy-5-hydroxy-tetrahydrofuran-2-yl)-2-acetoxy-ethyl] acetate	6291110			ChEMBLE_NTD	[2-(4-acetamido-3-acetoxy-5-benzyloxy-tetrahydrofuran-2-yl)-2-acetoxy-ethyl] acetate	6300435	CC(=O)NC1C(OCc2ccccc2)OC(C1OC(=O)C)C(OC(=O)C)COC(=O)C			ChEMBLE_NTD	1	0.535714	0.767857
S-2-(Indol-3-yl)acetyl-CoA	1468001838		C15489		[2-(4-acetamidoanilino)-2-oxo-ethyl] 2-(1H-indol-3-yl)acetate	23856861	O=C(Nc1ccc(cc1)NC(=O)C)COC(=O)Cc1c[nH]c2c1cccc2			CHEMBL1303242	1	0.535714	0.767857
Indolebutyric acid	1467968831		C11284	CHEMBL582878	[2-(4-acetamidoanilino)-2-oxo-ethyl] 4-(1H-indol-3-yl)butanoate	72512587	O=C(OCC(=O)Nc1ccc(cc1)NC(=O)C)CCCc1c[nH]c2c1cccc2			CHEMBL1608449	1	0.535714	0.767857
(5-acetamido-3,4-diacetoxy-6-hydroxy-tetrahydropyran-2-yl)methyl acetate	6306075			ChEMBLE_NTD	[3-acetamido-4,5-diacetoxy-6-(acetoxymethyl)tetrahydropyran-2-yl] benzoate	6303776	CC(=O)OCC1OC(OC(=O)c2ccccc2)C(C(C1OC(=O)C)OC(=O)C)NC(=O)C			ChEMBLE_NTD	1	0.535714	0.767857
N-Acetyl-D-glucosamine 1-phosphate	1467901708		C04256,C04501,C18055,C18060		[3-acetamido-4,5-dihydroxy-6-(hydroxymethyl)-2-oxanyl] [[(3R)-3,7-dimethyloct-6-enoxy]-hydroxyphosphoryl] hydrogen phosphate	279458821	OCC1OC(OP(=O)(OP(=O)(OCCC(CCC=C(C)C)C)O)O)C(C(C1O)O)NC(=O)C			CHEMBL104957	1	0.535714	0.767857
(5-acetamido-3,4-diacetoxy-6-hydroxy-tetrahydropyran-2-yl)methyl acetate	6306075			ChEMBLE_NTD	[5-acetamido-3,4-diacetoxy-6-(cyclohexoxy)tetrahydropyran-2-yl]methyl acetate	27611138	CC(=O)OCC1OC(OC2CCCCC2)C(C(C1OC(=O)C)OC(=O)C)NC(=O)C			CHEMBL1366786	1	0.535714	0.767857
(5-acetamido-3,4-diacetoxy-6-hydroxy-tetrahydropyran-2-yl)methyl acetate	6306075			ChEMBLE_NTD	[5-acetamido-3,4-diacetoxy-6-[2-(2,4-dichlorophenoxy)ethoxy]tetrahydropyran-2-yl]methyl acetate	27611655	CC(=O)OCC1OC(OCCOc2ccc(cc2Cl)Cl)C(C(C1OC(=O)C)OC(=O)C)NC(=O)C			CHEMBL1439936	1	0.535714	0.767857
(5-acetamido-3,4-diacetoxy-6-benzyloxy-tetrahydropyran-2-yl)methyl acetate	6300311			ChEMBLE_NTD,CHEMBL1341094	[5-acetamido-4-acetoxy-6-benzyloxy-2-(hydroxymethyl)tetrahydropyran-3-yl] acetate	42770996	OCC1OC(OCc2ccccc2)C(C(C1OC(=O)C)OC(=O)C)NC(=O)C			CHEMBL1342735	1	0.535714	0.767857
Laninamivir	5957191	DB12791	C21557,D09410	CHEMBL1673194,CHEMBL466246	1-(cyclohexoxycarbonyloxy)ethyl (2R,3R,4S)-3-acetamido-2-[(1R,2R)-2,3-dihydroxy-1-methoxy-propyl]-4-guanidino-3,4-dihydro-2H-pyran-6-carboxylate	281812384	COC(C1OC(=CC(C1NC(=O)C)N=C(N)N)C(=O)OC(OC(=O)OC1CCCCC1)C)C(CO)O			CHEMBL466417	1	0.535714	0.767857
2-Deoxy-2,3-dehydro-N-acetylneuraminic acid	1467904028		C04580	CHEMBL1161589,CHEMBL116550,CHEMBL291345,CHEMBL334952,CHEMBL416139,CHEMBL77627,CHEMBL96712	1-[(2R,3R,4S)-3-acetamido-6-carboxy-2-[(1R,2R)-1,2,3-trihydroxypropyl]-3,4-dihydro-2H-pyran-4-yl]piperidine-3-carboxylic acid	482468585	OCC(C(C1OC(=CC(C1NC(=O)C)N1CCCC(C1)C(=O)O)C(=O)O)O)O			CHEMBL2041483	1	0.535714	0.767857
Laninamivir	5957191	DB12791	C21557,D09410	CHEMBL1673194,CHEMBL466246	1-ethoxycarbonyloxyethyl (2R,3R,4S)-3-acetamido-2-[(1R,2R)-2,3-dihydroxy-1-methoxy-propyl]-4-guanidino-3,4-dihydro-2H-pyran-6-carboxylate	281812373	CCOC(=O)OC(OC(=O)C1=CC(C(C(O1)C(C(CO)O)OC)NC(=O)C)N=C(N)N)C			CHEMBL466416	1	0.535714	0.767857
1-O-(2-Acetamido-2-deoxy-alpha-D-glucopyranosyl)-1D-myo-inositol 3-phosphate	1468040166		C19761		1-O-[2-(Acetylamino)-2-deoxy-alpha-D-glucopyranosyl]-D-myo-Inositol	1468040342	OCC1OC(OC2C(O)C(O)C(C(C2O)O)O)C(C(C1O)O)NC(=O)C		C19784	CHEMBL1093122	1	0.535714	0.767857
6-(alpha-D-Glucosaminyl)-1D-myo-inositol	1468003403		C15658,C19702		1-O-[2-(Acetylamino)-2-deoxy-alpha-D-glucopyranosyl]-D-myo-Inositol	1468040342	OCC1OC(OC2C(O)C(O)C(C(C2O)O)O)C(C(C1O)O)NC(=O)C		C19784	CHEMBL1093122	1	0.535714	0.767857
Inositol 1-phosphate	1467878427		C01177,C03546,C04006,C06155	CHEMBL281435	1-O-[2-(Acetylamino)-2-deoxy-alpha-D-glucopyranosyl]-D-myo-Inositol	1468040342	OCC1OC(OC2C(O)C(O)C(C(C2O)O)O)C(C(C1O)O)NC(=O)C		C19784	CHEMBL1093122	1	0.535714	0.767857
N-Acetyl-D-glucosamine	1467867422	DB03109,EXPT02281	C00140,C00645,C01132,C02711,C03136,C03878,C05021,C20328,C21036,C21039,C21049,C21052,C21061	ChEMBLE_NTD,CHEMBL1210905,CHEMBL1231391,CHEMBL1414815,CHEMBL240524,CHEMBL39064,CHEMBL447878,CHEMBL469447,CHEMBL83479	1-O-[2-(Acetylamino)-2-deoxy-alpha-D-glucopyranosyl]-D-myo-Inositol	1468040342	OCC1OC(OC2C(O)C(O)C(C(C2O)O)O)C(C(C1O)O)NC(=O)C		C19784	CHEMBL1093122	1	0.535714	0.767857
N-Acetyl-D-glucosamine 1-phosphate	1467901708		C04256,C04501,C18055,C18060		1-O-[2-(Acetylamino)-2-deoxy-alpha-D-glucopyranosyl]-D-myo-Inositol	1468040342	OCC1OC(OC2C(O)C(O)C(C(C2O)O)O)C(C(C1O)O)NC(=O)C		C19784	CHEMBL1093122	1	0.535714	0.767857
N-Acetyl-D-glucosaminylphosphatidylinositol	1468573394				1-O-[2-(Acetylamino)-2-deoxy-alpha-D-glucopyranosyl]-D-myo-Inositol	1468040342	OCC1OC(OC2C(O)C(O)C(C(C2O)O)O)C(C(C1O)O)NC(=O)C		C19784	CHEMBL1093122	1	0.535714	0.767857
N-Acetyl-D-mannosamine	1468065130		C00645	CHEMBL3182062	1-O-[2-(Acetylamino)-2-deoxy-alpha-D-glucopyranosyl]-D-myo-Inositol	1468040342	OCC1OC(OC2C(O)C(O)C(C(C2O)O)O)C(C(C1O)O)NC(=O)C		C19784	CHEMBL1093122	1	0.535714	0.767857
N-Acetyl-D-glucosamine	1467867422	DB03109,EXPT02281	C00140,C00645,C01132,C02711,C03136,C03878,C05021,C20328,C21036,C21039,C21049,C21052,C21061	ChEMBLE_NTD,CHEMBL1210905,CHEMBL1231391,CHEMBL1414815,CHEMBL240524,CHEMBL39064,CHEMBL447878,CHEMBL469447,CHEMBL83479	1-pyrrolidinecarbodithioic acid [(2S,3R,4R,5S,6R)-3-acetamido-4,5-dihydroxy-6-(hydroxymethyl)-2-oxanyl] ester	318197361	OCC1OC(SC(=S)N2CCCC2)C(C(C1O)O)NC(=O)C			CHEMBL1669320	1	0.535714	0.767857
Aridanin	1467940596		C08922	CHEMBL506209	10-[[3-acetamido-4,5-dihydroxy-6-(hydroxymethyl)-2-oxanyl]oxy]-5-hydroxy-2,2,6a,6b,9,9,12a-heptamethyl-1,3,4,5,6,6a,7,8,8a,10,11,12,13,14b-tetradecahydropicene-4a-carboxylic acid	124331392	OCC1OC(OC2CCC3(C(C2(C)C)CCC2(C3CC=C3C2(C)CC(C2(C3CC(C)(C)CC2)C(=O)O)O)C)C)C(C(C1O)O)NC(=O)C			CHEMBL505217	1	0.535714	0.767857
Echinocystic acid	1467940838		C08942	CHEMBL1395408,CHEMBL1559201,CHEMBL230128,CHEMBL464557	10-[[3-acetamido-4,5-dihydroxy-6-(hydroxymethyl)-2-oxanyl]oxy]-5-hydroxy-2,2,6a,6b,9,9,12a-heptamethyl-1,3,4,5,6,6a,7,8,8a,10,11,12,13,14b-tetradecahydropicene-4a-carboxylic acid	124331392	OCC1OC(OC2CCC3(C(C2(C)C)CCC2(C3CC=C3C2(C)CC(C2(C3CC(C)(C)CC2)C(=O)O)O)C)C)C(C(C1O)O)NC(=O)C			CHEMBL505217	1	0.535714	0.767857
Aridanin	1467940596		C08922	CHEMBL506209	10-[[3-acetamido-4,5-dihydroxy-6-[[3,4,5-trihydroxy-6-(hydroxymethyl)-2-oxanyl]oxymethyl]-2-oxanyl]oxy]-2,2,6a,6b,9,9,12a-heptamethyl-1,3,4,5,6,6a,7,8,8a,10,11,12,13,14b-tetradecahydropicene-4a-carboxylic acid	2591546	OCC1OC(OCC2OC(OC3CCC4(C(C3(C)C)CCC3(C4CC=C4C3(C)CCC3(C4CC(C)(C)CC3)C(=O)O)C)C)C(C(C2O)O)NC(=O)C)C(C(C1O)O)O			CHEMBL451292	1	0.535714	0.767857
N-Acetyl-D-glucosamine	1467867422	DB03109,EXPT02281	C00140,C00645,C01132,C02711,C03136,C03878,C05021,C20328,C21036,C21039,C21049,C21052,C21061	ChEMBLE_NTD,CHEMBL1210905,CHEMBL1231391,CHEMBL1414815,CHEMBL240524,CHEMBL39064,CHEMBL447878,CHEMBL469447,CHEMBL83479	2-[(2S,5S)-5-[(1R)-1-[[(2S,3R,4R,5R,6R)-3-acetamido-4,5-dihydroxy-6-(hydroxymethyl)-2-oxanyl]oxy]ethyl]-3,6-dioxo-2-piperazinyl]acetic acid	534724100	OCC1OC(OC(C2NC(=O)C(NC2=O)CC(=O)O)C)C(C(C1O)O)NC(=O)C			CHEMBL2349230	1	0.535714	0.767857
2-phenylaniline	73049			ChEMBLE_NTD,CHEMBL296021	2-[(4-acetamidophenyl)thio]-N-(2-phenylphenyl)acetamide	20683590	O=C(Nc1ccccc1c1ccccc1)CSc1ccc(cc1)NC(=O)C			CHEMBL1573136	1	0.535714	0.767857
Acetaminophen	1467921436	APRD00252,DB00316	C06804,D00217	ChEMBLE_NTD,CHEMBL112	2-[(4-acetamidophenyl)thio]-N-[(2R)-butan-2-yl]acetamide	20685326	CCC(NC(=O)CSc1ccc(cc1)NC(=O)C)C			CHEMBL1499325	1	0.535714	0.767857
N-(4-sulfanylphenyl)acetamide	701957			ChEMBLE_NTD,CHEMBL120794	2-[(4-acetamidophenyl)thio]-N-[(2R)-butan-2-yl]acetamide	20685326	CCC(NC(=O)CSc1ccc(cc1)NC(=O)C)C			CHEMBL1499325	1	0.535714	0.767857
N-Acetylmuramate	1467890798		C02713	ChEMBLE_NTD,CHEMBL1597841	2-[[[(1R)-1-[[(2R)-2-[[3-acetamido-2,5-dihydroxy-6-(hydroxymethyl)-4-oxanyl]oxy]-1-oxopropyl]amino]ethyl]-hydroxyphosphoryl]methyl]pentanedioic acid	279056388	OCC1OC(O)C(C(C1O)OC(C(=O)NC(P(=O)(CC(C(=O)O)CCC(=O)O)O)C)C)NC(=O)C			CHEMBL1160075	1	0.535714	0.767857
N-Acetylneuraminate	1467869128	DB01894,DB02344,DB03721,EXPT02292,EXPT02908,EXPT02909	C00270,C19909,C19910	CHEMBL109645,CHEMBL112030,CHEMBL1234621,CHEMBL152452,CHEMBL165084,CHEMBL307262,CHEMBL3138670,CHEMBL3187768	2-Deoxy-2,3-dehydro-N-acetylneuraminic acid	1467904028	OCC(C(C1OC(=CC(C1NC(=O)C)O)C(=O)O)O)O		C04580	CHEMBL1161589,CHEMBL116550,CHEMBL291345,CHEMBL334952,CHEMBL416139,CHEMBL77627,CHEMBL96712	1	0.535714	0.767857
Zanamivir	1467931432		C08095,D00902	CHEMBL127235,CHEMBL1357654,CHEMBL157939,CHEMBL1673195,CHEMBL174747,CHEMBL193303,CHEMBL222813,CHEMBL300502,CHEMBL3348924	2-Deoxy-2,3-dehydro-N-acetylneuraminic acid	1467904028	OCC(C(C1OC(=CC(C1NC(=O)C)O)C(=O)O)O)O		C04580	CHEMBL1161589,CHEMBL116550,CHEMBL291345,CHEMBL334952,CHEMBL416139,CHEMBL77627,CHEMBL96712	1	0.535714	0.767857
2-octadecoxyethanol	1886655		D08975	CHEMBL3181944	2-octadecoxyethyl (2R,3R,4S)-3-acetamido-4-guanidino-2-[(1R,2R)-1,2,3-trihydroxypropyl]-3,4-dihydro-2H-pyran-6-carboxylate	197756708	CCCCCCCCCCCCCCCCCCOCCOC(=O)C1=CC(N=C(N)N)C(C(O1)C(C(CO)O)O)NC(=O)C			CHEMBL266587	1	0.535714	0.767857
Zanamivir	1467931432		C08095,D00902	CHEMBL127235,CHEMBL1357654,CHEMBL157939,CHEMBL1673195,CHEMBL174747,CHEMBL193303,CHEMBL222813,CHEMBL300502,CHEMBL3348924	2-octadecoxyethyl (2R,3R,4S)-3-acetamido-4-guanidino-2-[(1R,2R)-1,2,3-trihydroxypropyl]-3,4-dihydro-2H-pyran-6-carboxylate	197756708	CCCCCCCCCCCCCCCCCCOCCOC(=O)C1=CC(N=C(N)N)C(C(O1)C(C(CO)O)O)NC(=O)C			CHEMBL266587	1	0.535714	0.767857
Acetaminophen	1467921436	APRD00252,DB00316	C06804,D00217	ChEMBLE_NTD,CHEMBL112	3-(4-acetamidophenoxy)sulfonylbenzoate	22164147	CC(=O)Nc1ccc(cc1)OS(=O)(=O)c1cccc(c1)C(=O)[O-]			CHEMBL1213148	1	0.535714	0.767857
N-(4-sulfanylphenyl)acetamide	701957			ChEMBLE_NTD,CHEMBL120794	3-(4-acetamidophenyl)sulfanyl-3-(3-pyridyl)propanoic acid	279781340	OC(=O)CC(c1cccnc1)Sc1ccc(cc1)NC(=O)C			CHEMBL158603	1	0.535714	0.767857
2-Deoxy-2,3-dehydro-N-acetylneuraminic acid	1467904028		C04580	CHEMBL1161589,CHEMBL116550,CHEMBL291345,CHEMBL334952,CHEMBL416139,CHEMBL77627,CHEMBL96712	3-acetamido-4-amino-2-(1,2,3-trihydroxypropyl)-3,4-dihydro-2H-pyran-6-carboxylic acid	18159	OCC(C(C1OC(=CC(C1NC(=O)C)N)C(=O)O)O)O			CHEMBL3349829,CHEMBL345693,CHEMBL367862,CHEMBL52270	1	0.535714	0.767857
Zanamivir	1467931432		C08095,D00902	CHEMBL127235,CHEMBL1357654,CHEMBL157939,CHEMBL1673195,CHEMBL174747,CHEMBL193303,CHEMBL222813,CHEMBL300502,CHEMBL3348924	3-acetamido-4-amino-2-(1,2,3-trihydroxypropyl)-3,4-dihydro-2H-pyran-6-carboxylic acid	18159	OCC(C(C1OC(=CC(C1NC(=O)C)N)C(=O)O)O)O			CHEMBL3349829,CHEMBL345693,CHEMBL367862,CHEMBL52270	1	0.535714	0.767857
3-acetamido-2-(3-amino-1,2-dihydroxypropyl)-4-hydroxy-3,4-dihydro-2H-pyran-6-carboxylic acid	20360	DB04227,EXPT00352		CHEMBL140830	3-acetamido-4-amino-2-(3-amino-1,2-dihydroxypropyl)-3,4-dihydro-2H-pyran-6-carboxylic acid	17917	NCC(C(C1OC(=CC(C1NC(=O)C)N)C(=O)O)O)O			CHEMBL141088	1	0.535714	0.767857
Zanamivir	1467931432		C08095,D00902	CHEMBL127235,CHEMBL1357654,CHEMBL157939,CHEMBL1673195,CHEMBL174747,CHEMBL193303,CHEMBL222813,CHEMBL300502,CHEMBL3348924	3-tetradecoxypropyl (2R,3R,4S)-3-acetamido-4-guanidino-2-[(1R,2R)-1,2,3-trihydroxypropyl]-3,4-dihydro-2H-pyran-6-carboxylate	280362131	CCCCCCCCCCCCCCOCCCOC(=O)C1=CC(N=C(N)N)C(C(O1)C(C(CO)O)O)NC(=O)C			CHEMBL236092	1	0.535714	0.767857
Acetanilide	1467927844		C07565	ChEMBLE_NTD,CHEMBL269644	4-acetamidobenzenesulfinic acid	5153073	CC(=O)Nc1ccc(cc1)S(=O)O			CHEMBL1206129	1	0.535714	0.767857
N-(4-sulfanylphenyl)acetamide	701957			ChEMBLE_NTD,CHEMBL120794	4-acetamidobenzenesulfinic acid	5153073	CC(=O)Nc1ccc(cc1)S(=O)O			CHEMBL1206129	1	0.535714	0.767857
N-[4-(3,4-dichlorophenyl)sulfonylphenyl]acetamide	6304669			ChEMBLE_NTD	4-acetamidobenzenesulfinic acid	5153073	CC(=O)Nc1ccc(cc1)S(=O)O			CHEMBL1206129	1	0.535714	0.767857
N-[4-(4-acetamidophenyl)sulfonylphenyl]acetamide	67439		D02751	ChEMBLE_NTD,CHEMBL154166	4-acetamidobenzenesulfinic acid	5153073	CC(=O)Nc1ccc(cc1)S(=O)O			CHEMBL1206129	1	0.535714	0.767857
N-[4-[4-(4-methylpiperazin-1-yl)phenyl]sulfonylphenyl]acetamide	6327198			ChEMBLE_NTD	4-acetamidobenzenesulfinic acid	5153073	CC(=O)Nc1ccc(cc1)S(=O)O			CHEMBL1206129	1	0.535714	0.767857
4-Chloroaniline	1467991256		C14450	CHEMBL15888	4-Chloroacetanilide	1467991745	CC(=O)Nc1ccc(cc1)Cl		C14494	CHEMBL15991	1	0.535714	0.767857
Acetanilide	1467927844		C07565	ChEMBLE_NTD,CHEMBL269644	4-Chloroacetanilide	1467991745	CC(=O)Nc1ccc(cc1)Cl		C14494	CHEMBL15991	1	0.535714	0.767857
4-Nitrophenol	1467875485		C00870	CHEMBL14130	4-nitrophenyl N-acetyl-beta-D-galactosaminide	1468088999	OCC1OC(Oc2ccc(cc2)[N+](=O)[O-])C(C(C1O)O)NC(=O)C			CHEMBL595014	1	0.535714	0.767857
N-Acetyl-D-glucosamine	1467867422	DB03109,EXPT02281	C00140,C00645,C01132,C02711,C03136,C03878,C05021,C20328,C21036,C21039,C21049,C21052,C21061	ChEMBLE_NTD,CHEMBL1210905,CHEMBL1231391,CHEMBL1414815,CHEMBL240524,CHEMBL39064,CHEMBL447878,CHEMBL469447,CHEMBL83479	4-nitrophenyl N-acetyl-beta-D-galactosaminide	1468088999	OCC1OC(Oc2ccc(cc2)[N+](=O)[O-])C(C(C1O)O)NC(=O)C			CHEMBL595014	1	0.535714	0.767857
D-Glucose 6-phosphate	1467866763		C00092,C00275,C00668,C01113,C01172,C02962,C02965,C03735	CHEMBL1159525,CHEMBL257975,CHEMBL402001	6-(N-acetyl-D-glucosaminyl-1-phosphono)-D-mannose	1468070295	OCC1OC(OP(=O)(OCC2OC(O)C(C(C2O)O)O)O)C(C(C1O)O)NC(=O)C			ChEMBLE_NTD	1	0.535714	0.767857
N-Acetyl-D-glucosamine 1-phosphate	1467901708		C04256,C04501,C18055,C18060		6-(N-acetyl-D-glucosaminyl-1-phosphono)-D-mannose	1468070295	OCC1OC(OP(=O)(OCC2OC(O)C(C(C2O)O)O)O)C(C(C1O)O)NC(=O)C			ChEMBLE_NTD	1	0.535714	0.767857
N-Acetyl-D-mannosamine	1468065130		C00645	CHEMBL3182062	6-(N-acetyl-D-glucosaminyl-1-phosphono)-D-mannose	1468070295	OCC1OC(OP(=O)(OCC2OC(O)C(C(C2O)O)O)O)C(C(C1O)O)NC(=O)C			ChEMBLE_NTD	1	0.535714	0.767857
(5-acetamido-3,4-diacetoxy-6-hydroxy-tetrahydropyran-2-yl)methyl acetate	6306075			ChEMBLE_NTD	acetic acid [5-acetamido-3,4-diacetyloxy-6-(acetylthio)-2-oxanyl]methyl ester	6312939	CC(=O)OCC1OC(SC(=O)C)C(C(C1OC(=O)C)OC(=O)C)NC(=O)C			ChEMBLE_NTD	1	0.535714	0.767857
Sulfamethoxazole	1467925536		C07315,D00447	ChEMBLE_NTD,CHEMBL443	Acetylsulfamethoxazole	1467982630	CC(=O)Nc1ccc(cc1)S(=O)(=O)Nc1noc(c1)C		C13061,D01601	CHEMBL3560298	1	0.535714	0.767857
2-O-alpha-L-Rhamnopyranosyl-D-glucopyranose	1467932419		C08244	CHEMBL1651520	alpha-L-Fucp-(1->2)-beta-D-Galp-(1->4)-beta-D-GlcpNAc	1468160811	OCC1OC(O)C(C(C1OC1OC(CO)C(C(C1OC1OC(C)C(C(C1O)O)O)O)O)O)NC(=O)C	DB04678		CHEMBL1232343	1	0.535714	0.767857
Cellobiose	1467868016		C00185,C00208,C00243,C00897,C01970,C01971,C02964,C06373,C06421,C06422,C20236,C20861,D00044	ChEMBLE_NTD,CHEMBL1231670,CHEMBL1254686,CHEMBL1614877,CHEMBL1903530,CHEMBL1908365,CHEMBL417016,CHEMBL469865,CHEMBL470274	alpha-L-Fucp-(1->2)-beta-D-Galp-(1->4)-beta-D-GlcpNAc	1468160811	OCC1OC(O)C(C(C1OC1OC(CO)C(C(C1OC1OC(C)C(C(C1O)O)O)O)O)O)NC(=O)C	DB04678		CHEMBL1232343	1	0.535714	0.767857
N-Acetyllactosamine	1467872809		C00611,C20887	CHEMBL457432	alpha-L-Fucp-(1->2)-beta-D-Galp-(1->4)-beta-D-GlcpNAc	1468160811	OCC1OC(O)C(C(C1OC1OC(CO)C(C(C1OC1OC(C)C(C(C1O)O)O)O)O)O)NC(=O)C	DB04678		CHEMBL1232343	1	0.535714	0.767857
Lacto-N-biose	1467917204		C06372,C07278	CHEMBL2303675,CHEMBL443119,CHEMBL469451	beta-D-Galp-(1->3)-[alpha-L-Fucp-(1->4)]-beta-D-GlcpNAc	1468205464	OCC1OC(O)C(C(C1OC1OC(C)C(C(C1O)O)O)OC1OC(CO)C(C(C1O)O)O)NC(=O)C			CHEMBL3590185	1	0.535714	0.767857
D-Glucose 1-phosphate	1467866916		C00103,C00446,C00636,C00663,C01002,C01171,C03384,C15924,C15926	CHEMBL1159526,CHEMBL1741538,CHEMBL291890,CHEMBL67622	beta-D-Galp-(1->4)-beta-D-GlcpNAc-OMe	1468220963	OCC1OC(OC)C(C(C1OC1OC(CO)C(C(C1O)O)O)O)NC(=O)C			CHEMBL2303860,CHEMBL502001	1	0.535714	0.767857
methyl N-acetyl-alpha-D-galactosaminide	1468161852	DB02612,DB04426,EXPT02108			beta-D-Galp-(1->4)-beta-D-GlcpNAc-OMe	1468220963	OCC1OC(OC)C(C(C1OC1OC(CO)C(C(C1O)O)O)O)NC(=O)C			CHEMBL2303860,CHEMBL502001	1	0.535714	0.767857
N-Acetyllactosamine	1467872809		C00611,C20887	CHEMBL457432	beta-D-Galp-(1->4)-beta-D-GlcpNAc-OMe	1468220963	OCC1OC(OC)C(C(C1OC1OC(CO)C(C(C1O)O)O)O)NC(=O)C			CHEMBL2303860,CHEMBL502001	1	0.535714	0.767857
N-Acetylmuramate	1467890798		C02713	ChEMBLE_NTD,CHEMBL1597841	butyl (2R)-2-[[(2S)-2-[[(2R)-2-[3-acetamido-2,5-dihydroxy-6-(hydroxymethyl)tetrahydropyran-4-yl]oxypropanoyl]amino]propanoyl]amino]-5-amino-5-oxo-pentanoate	526053	CCCCOC(=O)C(NC(=O)C(NC(=O)C(OC1C(NC(=O)C)C(O)OC(C1O)CO)C)C)CCC(=O)N			CHEMBL1908312,CHEMBL353826	1	0.535714	0.767857
N-Acetylmuramoyl-Ala	1467892918		C02999		butyl (2R)-2-[[(2S)-2-[[(2R)-2-[3-acetamido-2,5-dihydroxy-6-(hydroxymethyl)tetrahydropyran-4-yl]oxypropanoyl]amino]propanoyl]amino]-5-amino-5-oxo-pentanoate	526053	CCCCOC(=O)C(NC(=O)C(NC(=O)C(OC1C(NC(=O)C)C(O)OC(C1O)CO)C)C)CCC(=O)N			CHEMBL1908312,CHEMBL353826	1	0.535714	0.767857
Laninamivir	5957191	DB12791	C21557,D09410	CHEMBL1673194,CHEMBL466246	dodecyl (2R,3R,4S)-3-acetamido-2-[(1R,2R)-2,3-dihydroxy-1-methoxy-propyl]-4-guanidino-3,4-dihydro-2H-pyran-6-carboxylate	281811730	CCCCCCCCCCCCOC(=O)C1=CC(C(C(O1)C(C(CO)O)OC)NC(=O)C)N=C(N)N			CHEMBL467059	1	0.535714	0.767857
Zanamivir	1467931432		C08095,D00902	CHEMBL127235,CHEMBL1357654,CHEMBL157939,CHEMBL1673195,CHEMBL174747,CHEMBL193303,CHEMBL222813,CHEMBL300502,CHEMBL3348924	ethyl (2R,3R,4S)-3-acetamido-4-guanidino-2-[(1R,2R)-1,2,3-trihydroxypropyl]-3,4-dihydro-2H-pyran-6-carboxylate	374488624	CCOC(=O)C1=CC(C(C(O1)C(C(CO)O)O)NC(=O)C)N=C(N)N			CHEMBL1851978	1	0.535714	0.767857
Zanamivir	1467931432		C08095,D00902	CHEMBL127235,CHEMBL1357654,CHEMBL157939,CHEMBL1673195,CHEMBL174747,CHEMBL193303,CHEMBL222813,CHEMBL300502,CHEMBL3348924	heptyl (2R,3R,4S)-3-acetamido-4-guanidino-2-[(1R,2R)-1,2,3-trihydroxypropyl]-3,4-dihydro-2H-pyran-6-carboxylate	374613754	CCCCCCCOC(=O)C1=CC(C(C(O1)C(C(CO)O)O)NC(=O)C)N=C(N)N			CHEMBL1813527	1	0.535714	0.767857
Laninamivir	5957191	DB12791	C21557,D09410	CHEMBL1673194,CHEMBL466246	hexadecyl (2R,3R,4S)-3-acetamido-2-[(1R,2R)-2,3-dihydroxy-1-methoxy-propyl]-4-guanidino-3,4-dihydro-2H-pyran-6-carboxylate	281812036	CCCCCCCCCCCCCCCCOC(=O)C1=CC(N=C(N)N)C(C(O1)C(C(CO)O)OC)NC(=O)C			CHEMBL513815	1	0.535714	0.767857
4-O-methyl-&alpha;-D-glucuronate	1469355009	DB02722,EXPT01567		CHEMBL187785	Hyaluronic acid	1468423194	OCC1OC(OC)C(C(C1O)OC1OC(C(=O)O)C(C(C1O)O)OC)NC(=O)C			CHEMBL1909290	1	0.535714	0.767857
methyl N-acetyl-alpha-D-galactosaminide	1468161852	DB02612,DB04426,EXPT02108			Hyaluronic acid	1468423194	OCC1OC(OC)C(C(C1O)OC1OC(C(=O)O)C(C(C1O)O)OC)NC(=O)C			CHEMBL1909290	1	0.535714	0.767857
D-Glucose 1-phosphate	1467866916		C00103,C00446,C00636,C00663,C01002,C01171,C03384,C15924,C15926	CHEMBL1159526,CHEMBL1741538,CHEMBL291890,CHEMBL67622	Lacto-N-biose	1467917204	OCC1OC(O)C(C(C1O)OC1OC(CO)C(C(C1O)O)O)NC(=O)C		C06372,C07278	CHEMBL2303675,CHEMBL443119,CHEMBL469451	1	0.535714	0.767857
Lacto-N-tetraose	1467917194		C06371	CHEMBL595538	Lacto-N-biose	1467917204	OCC1OC(O)C(C(C1O)OC1OC(CO)C(C(C1O)O)O)NC(=O)C		C06372,C07278	CHEMBL2303675,CHEMBL443119,CHEMBL469451	1	0.535714	0.767857
N-Acetyl-D-glucosamine	1467867422	DB03109,EXPT02281	C00140,C00645,C01132,C02711,C03136,C03878,C05021,C20328,C21036,C21039,C21049,C21052,C21061	ChEMBLE_NTD,CHEMBL1210905,CHEMBL1231391,CHEMBL1414815,CHEMBL240524,CHEMBL39064,CHEMBL447878,CHEMBL469447,CHEMBL83479	Lacto-N-biose	1467917204	OCC1OC(O)C(C(C1O)OC1OC(CO)C(C(C1O)O)O)NC(=O)C		C06372,C07278	CHEMBL2303675,CHEMBL443119,CHEMBL469451	1	0.535714	0.767857
N-Acetyl-D-mannosamine	1468065130		C00645	CHEMBL3182062	Lacto-N-biose	1467917204	OCC1OC(O)C(C(C1O)OC1OC(CO)C(C(C1O)O)O)NC(=O)C		C06372,C07278	CHEMBL2303675,CHEMBL443119,CHEMBL469451	1	0.535714	0.767857
Cellobiose	1467868016		C00185,C00208,C00243,C00897,C01970,C01971,C02964,C06373,C06421,C06422,C20236,C20861,D00044	ChEMBLE_NTD,CHEMBL1231670,CHEMBL1254686,CHEMBL1614877,CHEMBL1903530,CHEMBL1908365,CHEMBL417016,CHEMBL469865,CHEMBL470274	Lacto-N-tetraose	1467917194	OCC1OC(OC2C(CO)OC(C(C2O)O)O)C(C(C1O)OC1OC(CO)C(C(C1NC(=O)C)OC1OC(CO)C(C(C1O)O)O)O)O		C06371	CHEMBL595538	1	0.535714	0.767857
Lacto-N-biose	1467917204		C06372,C07278	CHEMBL2303675,CHEMBL443119,CHEMBL469451	Lacto-N-tetraose	1467917194	OCC1OC(OC2C(CO)OC(C(C2O)O)O)C(C(C1O)OC1OC(CO)C(C(C1NC(=O)C)OC1OC(CO)C(C(C1O)O)O)O)O		C06371	CHEMBL595538	1	0.535714	0.767857
Indomethacin	1467884759		C01926,D00141	ChEMBLE_NTD,CHEMBL6	N-(4-acetamidophenyl)-2-[1-(4-chlorobenzoyl)-5-methoxy-2-methyl-indol-3-yl]acetamide	40255745	COc1ccc2c(c1)c(CC(=O)Nc1ccc(cc1)NC(=O)C)c(n2C(=O)c1ccc(cc1)Cl)C			CHEMBL95469	1	0.535714	0.767857
2-Chlorobenzoate	1467888282		C02357	CHEMBL115243	N-(4-acetamidophenyl)-2-chlorobenzamide	4147668	CC(=O)Nc1ccc(cc1)NC(=O)c1ccccc1Cl			CHEMBL1824923	1	0.535714	0.767857
2-phenylquinoline-4-carboxylic acid	89725		D07280	CHEMBL348000	N-(4-acetamidophenyl)-2-phenyl-4-quinolinecarboxamide	11949297	CC(=O)Nc1ccc(cc1)NC(=O)c1cc(nc2c1cccc2)c1ccccc1			CHEMBL1605822	1	0.535714	0.767857
diphenylacetic acid	1468160725	DB03588,EXPT01167		CHEMBL1232181	N-(4-acetamidophenyl)-2,2-diphenylacetamide	9988721	CC(=O)Nc1ccc(cc1)NC(=O)C(c1ccccc1)c1ccccc1			CHEMBL1508672	1	0.535714	0.767857
4-phenylbutyrate	1468089892	DB02000,DB06819,DB12600,EXPT00947		ChEMBLE_NTD,CHEMBL1469	N-(4-acetamidophenyl)-4-phenylbutanamide	9236529	O=C(Nc1ccc(cc1)NC(=O)C)CCCc1ccccc1			CHEMBL1726339	1	0.535714	0.767857
5-(2-chlorophenyl)furan-2-carboxylic acid	8725933	DB02909,EXPT01402		CHEMBL200238	N-(4-acetamidophenyl)-5-(2-chlorophenyl)furan-2-carboxamide	11660976	CC(=O)Nc1ccc(cc1)NC(=O)c1ccc(o1)c1ccccc1Cl			CHEMBL1377463	1	0.535714	0.767857
1-Naphthoic acid	1467987469		C14091	CHEMBL1160	N-(4-acetamidophenyl)naphthalene-1-carboxamide	4142426	CC(=O)Nc1ccc(cc1)NC(=O)c1cccc2c1cccc2			CHEMBL1708993	1	0.535714	0.767857
Acetaminophen	1467921436	APRD00252,DB00316	C06804,D00217	ChEMBLE_NTD,CHEMBL112	N-(4-aminophenyl)acetamide	315197	CC(=O)Nc1ccc(cc1)N			CHEMBL1318876	1	0.535714	0.767857
N-(4-acetamidophenyl)-3-chloro-2,2-dimethylpropanamide	52245380			ChEMBLE_NTD,CHEMBL597454	N-(4-aminophenyl)acetamide	315197	CC(=O)Nc1ccc(cc1)N			CHEMBL1318876	1	0.535714	0.767857
N-(4-acetamidophenyl)-3-oxobutanamide	1918665			ChEMBLE_NTD	N-(4-aminophenyl)acetamide	315197	CC(=O)Nc1ccc(cc1)N			CHEMBL1318876	1	0.535714	0.767857
para-Phenylenediamine	1468037964		C19499	CHEMBL403741	N-(4-aminophenyl)acetamide	315197	CC(=O)Nc1ccc(cc1)N			CHEMBL1318876	1	0.535714	0.767857
Acetaminophen	1467921436	APRD00252,DB00316	C06804,D00217	ChEMBLE_NTD,CHEMBL112	N-(4-bromophenyl)acetamide	80220	CC(=O)Nc1ccc(cc1)Br			CHEMBL59019	1	0.535714	0.767857
Acetanilide	1467927844		C07565	ChEMBLE_NTD,CHEMBL269644	N-(4-bromophenyl)acetamide	80220	CC(=O)Nc1ccc(cc1)Br			CHEMBL59019	1	0.535714	0.767857
4-Fluoroaniline	1467966133		C11014	CHEMBL32014	N-(4-fluorophenyl)acetamide	99520	CC(=O)Nc1ccc(cc1)F			CHEMBL125099	1	0.535714	0.767857
Acetaminophen	1467921436	APRD00252,DB00316	C06804,D00217	ChEMBLE_NTD,CHEMBL112	N-(4-fluorophenyl)acetamide	99520	CC(=O)Nc1ccc(cc1)F			CHEMBL125099	1	0.535714	0.767857
Acetanilide	1467927844		C07565	ChEMBLE_NTD,CHEMBL269644	N-(4-fluorophenyl)acetamide	99520	CC(=O)Nc1ccc(cc1)F			CHEMBL125099	1	0.535714	0.767857
Acetaminophen	1467921436	APRD00252,DB00316	C06804,D00217	ChEMBLE_NTD,CHEMBL112	N-(4-sulfanylphenyl)acetamide	701957	CC(=O)Nc1ccc(cc1)S			ChEMBLE_NTD,CHEMBL120794	1	0.535714	0.767857
N-[4-[(3,5-dichloro-2,6-dimethyl-4-pyridinyl)thio]phenyl]acetamide	6324623			ChEMBLE_NTD	N-(4-sulfanylphenyl)acetamide	701957	CC(=O)Nc1ccc(cc1)S			ChEMBLE_NTD,CHEMBL120794	1	0.535714	0.767857
N-[4-[(4-amino-3-cyanophenyl)thio]phenyl]acetamide	6321571			ChEMBLE_NTD	N-(4-sulfanylphenyl)acetamide	701957	CC(=O)Nc1ccc(cc1)S			ChEMBLE_NTD,CHEMBL120794	1	0.535714	0.767857
(4-acetamidophenyl)methyl-[(1S)-1-phenylethoxy]phosphinic acid	5487010	DB08545			N-(p-tolyl)acetamide	80231	CC(=O)Nc1ccc(cc1)C			CHEMBL1604472	1	0.535714	0.767857
2-(4-acetamidophenyl)acetic acid	21236		D01395	ChEMBLE_NTD,CHEMBL1885632	N-(p-tolyl)acetamide	80231	CC(=O)Nc1ccc(cc1)C			CHEMBL1604472	1	0.535714	0.767857
N-Acetyl-D-glucosamine	1467867422	DB03109,EXPT02281	C00140,C00645,C01132,C02711,C03136,C03878,C05021,C20328,C21036,C21039,C21049,C21052,C21061	ChEMBLE_NTD,CHEMBL1210905,CHEMBL1231391,CHEMBL1414815,CHEMBL240524,CHEMBL39064,CHEMBL447878,CHEMBL469447,CHEMBL83479	N-[(2R,3R,4R,5S,6R)-4,5-dihydroxy-2-[(Z)-4-hydroxybut-2-enoxy]-6-(hydroxymethyl)-3-oxanyl]acetamide	115150158	OCC=CCOC1OC(CO)C(C(C1NC(=O)C)O)O			CHEMBL240526	1	0.535714	0.767857
N-Acetyl-D-glucosamine	1467867422	DB03109,EXPT02281	C00140,C00645,C01132,C02711,C03136,C03878,C05021,C20328,C21036,C21039,C21049,C21052,C21061	ChEMBLE_NTD,CHEMBL1210905,CHEMBL1231391,CHEMBL1414815,CHEMBL240524,CHEMBL39064,CHEMBL447878,CHEMBL469447,CHEMBL83479	N-[(2R,3R,4R,5S,6R)-4,5-dihydroxy-6-(hydroxymethyl)-2-[(3-hydroxyphenyl)methoxy]-3-oxanyl]acetamide	374543860	OCC1OC(OCc2cccc(c2)O)C(C(C1O)O)NC(=O)C			CHEMBL1818658	1	0.535714	0.767857
N-Acetyl-D-glucosamine	1467867422	DB03109,EXPT02281	C00140,C00645,C01132,C02711,C03136,C03878,C05021,C20328,C21036,C21039,C21049,C21052,C21061	ChEMBLE_NTD,CHEMBL1210905,CHEMBL1231391,CHEMBL1414815,CHEMBL240524,CHEMBL39064,CHEMBL447878,CHEMBL469447,CHEMBL83479	N-[(2R,3R,4R,5S,6R)-4,5-dihydroxy-6-(hydroxymethyl)-2-[3-(4-methoxyphenyl)propoxy]-3-oxanyl]acetamide	342575412	OCC1OC(OCCCc2ccc(cc2)OC)C(C(C1O)O)NC(=O)C			CHEMBL1818663	1	0.535714	0.767857
N-Acetyl-D-glucosamine	1467867422	DB03109,EXPT02281	C00140,C00645,C01132,C02711,C03136,C03878,C05021,C20328,C21036,C21039,C21049,C21052,C21061	ChEMBLE_NTD,CHEMBL1210905,CHEMBL1231391,CHEMBL1414815,CHEMBL240524,CHEMBL39064,CHEMBL447878,CHEMBL469447,CHEMBL83479	N-[(2R,3R,4R,5S,6R)-4,5-dihydroxy-6-(hydroxymethyl)-2-[4-(4-sulfamoylphenyl)-1-triazolyl]-3-oxanyl]acetamide	209838810	OCC1OC(n2nnc(c2)c2ccc(cc2)S(=O)(=O)N)C(C(C1O)O)NC(=O)C			CHEMBL270334	1	0.535714	0.767857
N-Acetyl-D-mannosaminolactone	1467898430		C03776		N-[(2R,3R,4R,5S,6R)-4,5-dihydroxy-6-(hydroxymethyl)-2-[4-(4-sulfamoylphenyl)-1-triazolyl]-3-oxanyl]acetamide	209838810	OCC1OC(n2nnc(c2)c2ccc(cc2)S(=O)(=O)N)C(C(C1O)O)NC(=O)C			CHEMBL270334	1	0.535714	0.767857
methyl N-acetyl-alpha-D-galactosaminide	1468161852	DB02612,DB04426,EXPT02108			N-[(2R,3R,4R,5S,6R)-5-[[(2S,3R,4S,5R,6R)-4-amino-3,5-dihydroxy-6-(hydroxymethyl)-2-oxanyl]oxy]-4-hydroxy-6-(hydroxymethyl)-2-methoxy-3-oxanyl]acetamide	102416342	OCC1OC(OC)C(C(C1OC1OC(CO)C(C(C1O)N)O)O)NC(=O)C			CHEMBL326048	1	0.535714	0.767857
Zanamivir	1467931432		C08095,D00902	CHEMBL127235,CHEMBL1357654,CHEMBL157939,CHEMBL1673195,CHEMBL174747,CHEMBL193303,CHEMBL222813,CHEMBL300502,CHEMBL3348924	N-[(2R,3R,4S)-6-(dihydroxymethyl)-4-guanidino-2-[(2R)-1,2,3-trihydroxypropyl]-3,4-dihydro-2H-pyran-3-yl]acetamide	279712322	OCC(C(C1OC(=CC(C1NC(=O)C)N=C(N)N)C(O)O)O)O			CHEMBL348207	1	0.535714	0.767857
2-Deoxy-2,3-dehydro-N-acetylneuraminic acid	1467904028		C04580	CHEMBL1161589,CHEMBL116550,CHEMBL291345,CHEMBL334952,CHEMBL416139,CHEMBL77627,CHEMBL96712	N-[(2R,3R,4S)-6-(dihydroxymethyl)-4-hydroxy-2-[(2R)-1,2,3-trihydroxypropyl]-3,4-dihydro-2H-pyran-3-yl]acetamide	279712135	OCC(C(C1OC(=CC(C1NC(=O)C)O)C(O)O)O)O			CHEMBL148966	1	0.535714	0.767857
N-Acetyl-D-glucosamine	1467867422	DB03109,EXPT02281	C00140,C00645,C01132,C02711,C03136,C03878,C05021,C20328,C21036,C21039,C21049,C21052,C21061	ChEMBLE_NTD,CHEMBL1210905,CHEMBL1231391,CHEMBL1414815,CHEMBL240524,CHEMBL39064,CHEMBL447878,CHEMBL469447,CHEMBL83479	N-[(2R,3S,4S,5R,6S)-2-(3-ethylphenoxy)-4,5-dihydroxy-6-(hydroxymethyl)-3-oxanyl]acetamide	9958794	OCC1OC(Oc2cccc(c2)CC)C(C(C1O)O)NC(=O)C			CHEMBL1302981	1	0.535714	0.767857
N-Acetyllactosamine	1467872809		C00611,C20887	CHEMBL457432	N-[(2S,3R,4R,5S,6R)-4-hydroxy-6-(hydroxymethyl)-2-(12-mercaptododecoxy)-5-[[(2S,3R,4S,5R,6R)-3,4,5-trihydroxy-6-(hydroxymethyl)-2-oxanyl]oxy]-3-oxanyl]acetamide	336804355	SCCCCCCCCCCCCOC1OC(CO)C(C(C1NC(=O)C)O)OC1OC(CO)C(C(C1O)O)O			CHEMBL1669631	1	0.535714	0.767857
N-Acetyl-D-glucosamine	1467867422	DB03109,EXPT02281	C00140,C00645,C01132,C02711,C03136,C03878,C05021,C20328,C21036,C21039,C21049,C21052,C21061	ChEMBLE_NTD,CHEMBL1210905,CHEMBL1231391,CHEMBL1414815,CHEMBL240524,CHEMBL39064,CHEMBL447878,CHEMBL469447,CHEMBL83479	N-[(2S,3R,4R,5S,6R)-4,5-dihydroxy-6-(hydroxymethyl)-2-(4-phenylbutoxy)-3-oxanyl]acetamide	131454163	OCC1OC(OCCCCc2ccccc2)C(C(C1O)O)NC(=O)C			CHEMBL217889	1	0.535714	0.767857
N-Acetyl-D-glucosamine	1467867422	DB03109,EXPT02281	C00140,C00645,C01132,C02711,C03136,C03878,C05021,C20328,C21036,C21039,C21049,C21052,C21061	ChEMBLE_NTD,CHEMBL1210905,CHEMBL1231391,CHEMBL1414815,CHEMBL240524,CHEMBL39064,CHEMBL447878,CHEMBL469447,CHEMBL83479	N-[(2S,3R,4R,5S,6R)-4,5-dihydroxy-6-(hydroxymethyl)-2-[(6-methoxy-2-naphthalenyl)oxy]-3-oxanyl]acetamide	100912479	OCC1OC(Oc2ccc3c(c2)ccc(c3)OC)C(C(C1O)O)NC(=O)C			CHEMBL320104	1	0.535714	0.767857
N-Acetyllactosamine	1467872809		C00611,C20887	CHEMBL457432	N-[(2S,3R,4R,5S,6R)-5-[[(2S,3R,4S,5R,6R)-4,5-dihydroxy-6-(hydroxymethyl)-3-methoxy-2-oxanyl]oxy]-2,4-dihydroxy-6-(hydroxymethyl)-3-oxanyl]acetamide	99698087	OCC1OC(O)C(C(C1OC1OC(CO)C(C(C1OC)O)O)O)NC(=O)C			CHEMBL3215434	1	0.535714	0.767857
N-Acetyl-D-glucosamine	1467867422	DB03109,EXPT02281	C00140,C00645,C01132,C02711,C03136,C03878,C05021,C20328,C21036,C21039,C21049,C21052,C21061	ChEMBLE_NTD,CHEMBL1210905,CHEMBL1231391,CHEMBL1414815,CHEMBL240524,CHEMBL39064,CHEMBL447878,CHEMBL469447,CHEMBL83479	N-[(2S,3R,4S,5S,6R)-4,5-dihydroxy-6-(hydroxymethyl)-2-(2-naphthalenyloxy)-3-oxanyl]acetamide	8265799	OCC1OC(Oc2ccc3c(c2)cccc3)C(C(C1O)O)NC(=O)C			CHEMBL112241	1	0.535714	0.767857
N-Acetyl-D-glucosamine 1-phosphate	1467901708		C04256,C04501,C18055,C18060		N-[(2S,3S,4S,5R,6S)-2-[(2R)-butan-2-yl]oxy-4,5-dihydroxy-6-(hydroxymethyl)-3-oxanyl]acetamide	9958180	CCC(OC1OC(CO)C(C(C1NC(=O)C)O)O)C			CHEMBL1542852	1	0.535714	0.767857
N-Acetyl-D-mannosamine	1468065130		C00645	CHEMBL3182062	N-[(2S,3S,4S,5R,6S)-2-[(2R)-butan-2-yl]oxy-4,5-dihydroxy-6-(hydroxymethyl)-3-oxanyl]acetamide	9958180	CCC(OC1OC(CO)C(C(C1NC(=O)C)O)O)C			CHEMBL1542852	1	0.535714	0.767857
N-Acetyl-D-glucosamine	1467867422	DB03109,EXPT02281	C00140,C00645,C01132,C02711,C03136,C03878,C05021,C20328,C21036,C21039,C21049,C21052,C21061	ChEMBLE_NTD,CHEMBL1210905,CHEMBL1231391,CHEMBL1414815,CHEMBL240524,CHEMBL39064,CHEMBL447878,CHEMBL469447,CHEMBL83479	N-[(2S,3S,4S,5R,6S)-4,5-dihydroxy-6-(hydroxymethyl)-2-(2-phenylethoxy)-3-oxanyl]acetamide	10143866	OCC1OC(OCCc2ccccc2)C(C(C1O)O)NC(=O)C			CHEMBL1818657,CHEMBL384591	1	0.535714	0.767857
N-Acetyl-D-glucosamine	1467867422	DB03109,EXPT02281	C00140,C00645,C01132,C02711,C03136,C03878,C05021,C20328,C21036,C21039,C21049,C21052,C21061	ChEMBLE_NTD,CHEMBL1210905,CHEMBL1231391,CHEMBL1414815,CHEMBL240524,CHEMBL39064,CHEMBL447878,CHEMBL469447,CHEMBL83479	N-[(3R,4R,5S,6R)-2-[(3,4-dihydroxyphenyl)methyl-phenylmethoxyamino]-4,5-dihydroxy-6-(hydroxymethyl)-3-oxanyl]acetamide	667110886	OCC1OC(N(Cc2ccc(c(c2)O)O)OCc2ccccc2)C(C(C1O)O)NC(=O)C			CHEMBL3218192	1	0.535714	0.767857
N-Acetyl-D-mannosaminolactone	1467898430		C03776		N-[(3R,4R,5S,6R)-2-[(3,4-dihydroxyphenyl)methyl-phenylmethoxyamino]-4,5-dihydroxy-6-(hydroxymethyl)-3-oxanyl]acetamide	667110886	OCC1OC(N(Cc2ccc(c(c2)O)O)OCc2ccccc2)C(C(C1O)O)NC(=O)C			CHEMBL3218192	1	0.535714	0.767857
N-Acetyl-D-glucosamine	1467867422	DB03109,EXPT02281	C00140,C00645,C01132,C02711,C03136,C03878,C05021,C20328,C21036,C21039,C21049,C21052,C21061	ChEMBLE_NTD,CHEMBL1210905,CHEMBL1231391,CHEMBL1414815,CHEMBL240524,CHEMBL39064,CHEMBL447878,CHEMBL469447,CHEMBL83479	N-[2-(3,5-dioxo-1,2,4-triazin-2-yl)-4,5-dihydroxy-6-(hydroxymethyl)-3-oxanyl]acetamide	4931590	OCC1OC(C(C(C1O)O)NC(=O)C)n1ncc(=O)[nH]c1=O			CHEMBL1965879	1	0.535714	0.767857
N-Acetyl-D-mannosaminolactone	1467898430		C03776		N-[2-(3,5-dioxo-1,2,4-triazin-2-yl)-4,5-dihydroxy-6-(hydroxymethyl)-3-oxanyl]acetamide	4931590	OCC1OC(C(C(C1O)O)NC(=O)C)n1ncc(=O)[nH]c1=O			CHEMBL1965879	1	0.535714	0.767857
diphenylacetic acid	1468160725	DB03588,EXPT01167		CHEMBL1232181	N-[2-(4-acetamidoanilino)-2-oxoethyl]-N-ethyl-2,2-diphenylacetamide	24689088	CCN(C(=O)C(c1ccccc1)c1ccccc1)CC(=O)Nc1ccc(cc1)NC(=O)C			CHEMBL1596185	1	0.535714	0.767857
N-Acetyl-D-glucosamine	1467867422	DB03109,EXPT02281	C00140,C00645,C01132,C02711,C03136,C03878,C05021,C20328,C21036,C21039,C21049,C21052,C21061	ChEMBLE_NTD,CHEMBL1210905,CHEMBL1231391,CHEMBL1414815,CHEMBL240524,CHEMBL39064,CHEMBL447878,CHEMBL469447,CHEMBL83479	N-[2-[(6-bromo-2-naphthalenyl)oxy]-4,5-dihydroxy-6-(hydroxymethyl)-3-oxanyl]acetamide	151796242	OCC1OC(Oc2ccc3c(c2)ccc(c3)Br)C(C(C1O)O)NC(=O)C			CHEMBL111972	1	0.535714	0.767857
N-Acetyl-D-glucosamine	1467867422	DB03109,EXPT02281	C00140,C00645,C01132,C02711,C03136,C03878,C05021,C20328,C21036,C21039,C21049,C21052,C21061	ChEMBLE_NTD,CHEMBL1210905,CHEMBL1231391,CHEMBL1414815,CHEMBL240524,CHEMBL39064,CHEMBL447878,CHEMBL469447,CHEMBL83479	N-[2-[2-(4-chloro-2-methylphenoxy)ethoxy]-4,5-dihydroxy-6-(hydroxymethyl)-3-oxanyl]acetamide	39366545	OCC1OC(OCCOc2ccc(cc2C)Cl)C(C(C1O)O)NC(=O)C			CHEMBL1346395	1	0.535714	0.767857
N-Acetyl-D-glucosamine	1467867422	DB03109,EXPT02281	C00140,C00645,C01132,C02711,C03136,C03878,C05021,C20328,C21036,C21039,C21049,C21052,C21061	ChEMBLE_NTD,CHEMBL1210905,CHEMBL1231391,CHEMBL1414815,CHEMBL240524,CHEMBL39064,CHEMBL447878,CHEMBL469447,CHEMBL83479	N-[2-[3,5-dioxo-6-(phenylmethylthio)-1,2,4-triazin-2-yl]-4,5-dihydroxy-6-(hydroxymethyl)-3-oxanyl]acetamide	4931579	OCC1OC(C(C(C1O)O)NC(=O)C)n1nc(SCc2ccccc2)c(=O)[nH]c1=O			CHEMBL2006218	1	0.535714	0.767857
N-Acetyl-D-mannosaminolactone	1467898430		C03776		N-[2-[3,5-dioxo-6-(phenylmethylthio)-1,2,4-triazin-2-yl]-4,5-dihydroxy-6-(hydroxymethyl)-3-oxanyl]acetamide	4931579	OCC1OC(C(C(C1O)O)NC(=O)C)n1nc(SCc2ccccc2)c(=O)[nH]c1=O			CHEMBL2006218	1	0.535714	0.767857
N-[4-(1-adamantyl)phenyl]acetamide	6282710			ChEMBLE_NTD,CHEMBL1547083	N-[4-(1-adamantyloxy)phenyl]acetamide	120142475	CC(=O)Nc1ccc(cc1)OC12CC3CC(C2)CC(C1)C3			CHEMBL3228499	1	0.535714	0.767857
4-amino-N-(1,3-benzothiazol-2-yl)benzenesulfonamide	3449963			ChEMBLE_NTD	N-[4-(1,3-benzothiazol-2-ylsulfamoyl)phenyl]acetamide	6326451	CC(=O)Nc1ccc(cc1)S(=O)(=O)Nc1nc2c(s1)cccc2			ChEMBLE_NTD,CHEMBL1427098	1	0.535714	0.767857
N-(4-sulfanylphenyl)acetamide	701957			ChEMBLE_NTD,CHEMBL120794	N-[4-(2-pyridinylmethylthio)phenyl]acetamide	121794810	CC(=O)Nc1ccc(cc1)SCc1ccccn1			CHEMBL1192770	1	0.535714	0.767857
Dapsone	1467928910		C07666,D00592	ChEMBLE_NTD,CHEMBL1043	N-[4-(4-aminophenyl)sulfonylphenyl]acetamide	116377	CC(=O)Nc1ccc(cc1)S(=O)(=O)c1ccc(cc1)N			CHEMBL1246	1	0.535714	0.767857
N-[4-(4-acetamidophenyl)sulfonylphenyl]acetamide	67439		D02751	ChEMBLE_NTD,CHEMBL154166	N-[4-(4-aminophenyl)sulfonylphenyl]acetamide	116377	CC(=O)Nc1ccc(cc1)S(=O)(=O)c1ccc(cc1)N			CHEMBL1246	1	0.535714	0.767857
4-Chlorocatechol	1467888435		C02375		N-[4-(4-chloro-2-hydroxyphenoxy)phenyl]acetamide	337135951	CC(=O)Nc1ccc(cc1)Oc1ccc(cc1O)Cl			CHEMBL1240913	1	0.535714	0.767857
Acetaminophen	1467921436	APRD00252,DB00316	C06804,D00217	ChEMBLE_NTD,CHEMBL112	N-[4-(4-chloro-2-hydroxyphenoxy)phenyl]acetamide	337135951	CC(=O)Nc1ccc(cc1)Oc1ccc(cc1O)Cl			CHEMBL1240913	1	0.535714	0.767857
Acetaminophen	1467921436	APRD00252,DB00316	C06804,D00217	ChEMBLE_NTD,CHEMBL112	N-[4-(p-tolylsulfonyl)phenyl]acetamide	3799378	CC(=O)Nc1ccc(cc1)S(=O)(=O)c1ccc(cc1)C			CHEMBL1585841	1	0.535714	0.767857
Acetaminophen	1467921436	APRD00252,DB00316	C06804,D00217	ChEMBLE_NTD,CHEMBL112	N-[4-[(2,4-diamino-6-quinazolinyl)thio]phenyl]acetamide	622053891	CC(=O)Nc1ccc(cc1)Sc1ccc2c(c1)c(N)nc(n2)N			CHEMBL3272727	1	0.535714	0.767857
N-(4-sulfanylphenyl)acetamide	701957			ChEMBLE_NTD,CHEMBL120794	N-[4-[(2,4-diamino-6-quinazolinyl)thio]phenyl]acetamide	622053891	CC(=O)Nc1ccc(cc1)Sc1ccc2c(c1)c(N)nc(n2)N			CHEMBL3272727	1	0.535714	0.767857
alloxan	1468302789			CHEMBL1096009	N-[4-[(2,4,6-trioxo-1,3-diazinan-5-ylidene)methyl]phenyl]acetamide	3709431	CC(=O)Nc1ccc(cc1)C=C1C(=O)NC(=O)NC1=O			CHEMBL1876182	1	0.535714	0.767857
Sulfisoxazole	1467925571		C07318,D00450	ChEMBLE_NTD,CHEMBL453	N-[4-[(3,4-dimethylisoxazol-5-yl)sulfamoyl]phenyl]acetamide	2714221	CC(=O)Nc1ccc(cc1)S(=O)(=O)Nc1onc(c1C)C			ChEMBLE_NTD,CHEMBL725	1	0.535714	0.767857
3,5-dichloro-2,6-dimethyl-1H-pyridin-4-one	185198		D03559	ChEMBLE_NTD,CHEMBL446918	N-[4-[(3,5-dichloro-2,6-dimethyl-4-pyridinyl)thio]phenyl]acetamide	6324623	CC(=O)Nc1ccc(cc1)Sc1c(Cl)c(C)nc(c1Cl)C			ChEMBLE_NTD	1	0.535714	0.767857
Acetaminophen	1467921436	APRD00252,DB00316	C06804,D00217	ChEMBLE_NTD,CHEMBL112	N-[4-[(3,5-dichloro-2,6-dimethyl-4-pyridinyl)thio]phenyl]acetamide	6324623	CC(=O)Nc1ccc(cc1)Sc1c(Cl)c(C)nc(c1Cl)C			ChEMBLE_NTD	1	0.535714	0.767857
N-(4-sulfanylphenyl)acetamide	701957			ChEMBLE_NTD,CHEMBL120794	N-[4-[(3,5-dichloro-2,6-dimethyl-4-pyridinyl)thio]phenyl]acetamide	6324623	CC(=O)Nc1ccc(cc1)Sc1c(Cl)c(C)nc(c1Cl)C			ChEMBLE_NTD	1	0.535714	0.767857
N-[4-[(3,5-dichloro-2,6-dimethyl-4-pyridyl)sulfinyl]phenyl]acetamide	6311730			ChEMBLE_NTD	N-[4-[(3,5-dichloro-2,6-dimethyl-4-pyridinyl)thio]phenyl]acetamide	6324623	CC(=O)Nc1ccc(cc1)Sc1c(Cl)c(C)nc(c1Cl)C			ChEMBLE_NTD	1	0.535714	0.767857
N-[4-[(3,5-dichloro-2,6-dimethyl-4-pyridinyl)thio]phenyl]acetamide	6324623			ChEMBLE_NTD	N-[4-[(3,5-dichloro-2,6-dimethyl-4-pyridyl)sulfinyl]phenyl]acetamide	6311730	CC(=O)Nc1ccc(cc1)S(=O)c1c(Cl)c(C)nc(c1Cl)C			ChEMBLE_NTD	1	0.535714	0.767857
N-(4-sulfanylphenyl)acetamide	701957			ChEMBLE_NTD,CHEMBL120794	N-[4-[(3,5-dimethyl-4-isoxazolyl)methylthio]phenyl]acetamide	15388817	CC(=O)Nc1ccc(cc1)SCc1c(C)noc1C			CHEMBL1874052	1	0.535714	0.767857
N-(4-oxocyclohexyl)acetamide	6301184			ChEMBLE_NTD	N-[4-[(4-fluorophenyl)sulfonylamino]cyclohexyl]acetamide	281954850	CC(=O)NC1CCC(CC1)NS(=O)(=O)c1ccc(cc1)F			CHEMBL456193,CHEMBL457450	1	0.535714	0.767857
4-amino-N-(5-isopropyl-1,3,4-thiadiazol-2-yl)benzenesulfonamide	656993		D02424	CHEMBL450117	N-[4-[(5-isopropyl-1,3,4-thiadiazol-2-yl)sulfamoyl]phenyl]acetamide	8387552	CC(=O)Nc1ccc(cc1)S(=O)(=O)Nc1nnc(s1)C(C)C			CHEMBL1700051	1	0.535714	0.767857
Sulfamethizole	1467931046	APRD00684,DB00576	C08050,D00870	ChEMBLE_NTD,CHEMBL1191	N-[4-[(5-methyl-1,3,4-thiadiazol-2-yl)sulfamoyl]phenyl]acetamide	8796489	CC(=O)Nc1ccc(cc1)S(=O)(=O)Nc1nnc(s1)C			CHEMBL1685032	1	0.535714	0.767857
N-(4-sulfanylphenyl)acetamide	701957			ChEMBLE_NTD,CHEMBL120794	N-[4-[(5-phenyl-2-oxazolyl)methylthio]phenyl]acetamide	47551981	CC(=O)Nc1ccc(cc1)SCc1ncc(o1)c1ccccc1			CHEMBL1383996	1	0.535714	0.767857
N-(4-sulfanylphenyl)acetamide	701957			ChEMBLE_NTD,CHEMBL120794	N-[4-[(5-sulfamoyl-2-thiophenyl)thio]phenyl]acetamide	120808902	CC(=O)Nc1ccc(cc1)Sc1ccc(s1)S(=O)(=O)N			CHEMBL176334	1	0.535714	0.767857
sulfamethoxypyridazine	1468368031		D02439	ChEMBLE_NTD,CHEMBL268869	N-[4-[(6-methoxypyridazin-3-yl)sulfamoyl]phenyl]acetamide	664601	COc1ccc(nn1)NS(=O)(=O)c1ccc(cc1)NC(=O)C			CHEMBL2107535	1	0.535714	0.767857
N-[4-[[(4-fluorophenyl)carbamothioylhydrazono]methyl]phenyl]acetamide	32512018			ChEMBLE_NTD	N-[4-[(carbamothioylhydrazono)methyl]phenyl]acetamide	26197113	CC(=O)Nc1ccc(cc1)C=NNC(=S)N	DB12829	D08584	CHEMBL375492	1	0.535714	0.767857
p-Tolualdehyde	1467921016		C06758	CHEMBL190927	N-[4-[(E)-2-(p-tolyl)vinyl]phenyl]acetamide	278851060	CC(=O)Nc1ccc(cc1)C=Cc1ccc(cc1)C			CHEMBL269114	1	0.535714	0.767857
1-Naphthoic acid	1467987469		C14091	CHEMBL1160	N-[4-[(naphthalene-1-carbonylamino)sulfamoyl]phenyl]acetamide	13011595	CC(=O)Nc1ccc(cc1)S(=O)(=O)NNC(=O)c1cccc2c1cccc2			CHEMBL1904729	1	0.535714	0.767857
Acetaminophen	1467921436	APRD00252,DB00316	C06804,D00217	ChEMBLE_NTD,CHEMBL112	N-[4-[[(2S,3R,4S,5S,6R)-3,4,5-trihydroxy-6-(hydroxymethyl)-2-oxanyl]oxy]phenyl]acetamide	2677119	OCC1OC(Oc2ccc(cc2)NC(=O)C)C(C(C1O)O)O			CHEMBL1173356,CHEMBL1761665	1	0.535714	0.767857
acetaminophen O-beta-D-glucosiduronate	1468136849			CHEMBL1647	N-[4-[[(2S,3R,4S,5S,6R)-3,4,5-trihydroxy-6-(hydroxymethyl)-2-oxanyl]oxy]phenyl]acetamide	2677119	OCC1OC(Oc2ccc(cc2)NC(=O)C)C(C(C1O)O)O			CHEMBL1173356,CHEMBL1761665	1	0.535714	0.767857
D-Glucose	1467865936	DB02379,EXPT00455,EXPT00685,EXPT01603	C00031,C00124,C00159,C00221,C00267,C00737,C00738,C00936,C00962,C00984,C01487,C01825,C02209,C06464,C06465,C06466,C06467,C15923,C21032,C21050,D00009	CHEMBL103010,CHEMBL1222152,CHEMBL1222250,CHEMBL1233058,CHEMBL1453070,CHEMBL1519430,CHEMBL1614854,CHEMBL1873035,CHEMBL195923,CHEMBL2093058,CHEMBL2115552,CHEMBL300520,CHEMBL3186423,CHEMBL365590,CHEMBL423707,CHEMBL469448,CHEMBL98182	N-[4-[[(2S,3R,4S,5S,6R)-3,4,5-trihydroxy-6-(hydroxymethyl)-2-oxanyl]oxy]phenyl]acetamide	2677119	OCC1OC(Oc2ccc(cc2)NC(=O)C)C(C(C1O)O)O			CHEMBL1173356,CHEMBL1761665	1	0.535714	0.767857
N-[4-[(carbamothioylhydrazono)methyl]phenyl]acetamide	26197113	DB12829	D08584	CHEMBL375492	N-[4-[[(4-fluorophenyl)carbamothioylhydrazono]methyl]phenyl]acetamide	32512018	S=C(Nc1ccc(cc1)F)NN=Cc1ccc(cc1)NC(=O)C			ChEMBLE_NTD	1	0.535714	0.767857
N-[4-[(carbamothioylhydrazono)methyl]phenyl]acetamide	26197113	DB12829	D08584	CHEMBL375492	N-[4-[[(4-methoxyphenyl)carbamothioylhydrazono]methyl]phenyl]acetamide	29038442	COc1ccc(cc1)NC(=S)NN=Cc1ccc(cc1)NC(=O)C			CHEMBL1984343,CHEMBL523111	1	0.535714	0.767857
2-(4-chloroanilino)pyridine-3-carboxylic acid	14982034	DB08784		CHEMBL1237007	N-[4-[[[2-(4-chloroanilino)pyridine-3-carbonyl]amino]sulfamoyl]phenyl]acetamide	131708098	CC(=O)Nc1ccc(cc1)S(=O)(=O)NNC(=O)c1cccnc1Nc1ccc(cc1)Cl			CHEMBL228208	1	0.535714	0.767857
Acetaminophen	1467921436	APRD00252,DB00316	C06804,D00217	ChEMBLE_NTD,CHEMBL112	N-[4-[[2-(2,5-dimethylphenyl)-2-oxoethyl]thio]phenyl]acetamide	23307684	CC(=O)Nc1ccc(cc1)SCC(=O)c1cc(C)ccc1C			CHEMBL1730823	1	0.535714	0.767857
N-(4-sulfanylphenyl)acetamide	701957			ChEMBLE_NTD,CHEMBL120794	N-[4-[[2-(2,5-dimethylphenyl)-2-oxoethyl]thio]phenyl]acetamide	23307684	CC(=O)Nc1ccc(cc1)SCC(=O)c1cc(C)ccc1C			CHEMBL1730823	1	0.535714	0.767857
N-(4-sulfanylphenyl)acetamide	701957			ChEMBLE_NTD,CHEMBL120794	N-[4-[[2-oxo-2-(1,2,5-trimethyl-3-pyrrolyl)ethyl]thio]phenyl]acetamide	20282242	CC(=O)Nc1ccc(cc1)SCC(=O)c1cc(n(c1C)C)C			CHEMBL1521773	1	0.535714	0.767857
3-(o-tolyl)-4-oxo-quinazoline-2-carbaldehyde	6209464			ChEMBLE_NTD	N-[4-[[3-(o-tolyl)-4-oxo-quinazolin-2-yl]methylsulfamoyl]phenyl]acetamide	123185147	CC(=O)Nc1ccc(cc1)S(=O)(=O)NCc1nc2ccccc2c(=O)n1c1ccccc1C			CHEMBL2298511	1	0.535714	0.767857
Acetaminophen	1467921436	APRD00252,DB00316	C06804,D00217	ChEMBLE_NTD,CHEMBL112	N-[4-[2-[(5S)-5-methyl-2-oxo-1-azepanyl]ethylthio]phenyl]acetamide	261181713	CC1CCN(C(=O)CC1)CCSc1ccc(cc1)NC(=O)C			CHEMBL1728372	1	0.535714	0.767857
N-(4-sulfanylphenyl)acetamide	701957			ChEMBLE_NTD,CHEMBL120794	N-[4-[2-[(5S)-5-methyl-2-oxo-1-azepanyl]ethylthio]phenyl]acetamide	261181713	CC1CCN(C(=O)CC1)CCSc1ccc(cc1)NC(=O)C			CHEMBL1728372	1	0.535714	0.767857
Practolol	1467972878		C11696,D05587	ChEMBLE_NTD,CHEMBL1358416,CHEMBL6995	N-[4-[3-(isopropylamino)propoxy]phenyl]acetamide	102565501	CC(NCCCOc1ccc(cc1)NC(=O)C)C			CHEMBL133161	1	0.535714	0.767857
diphenyl(4-piperidyl)methanol	162000			ChEMBLE_NTD,CHEMBL127508	N-[4-[3-[4-[hydroxy(diphenyl)methyl]-1-piperidyl]propoxy]phenyl]acetamide	318440751	CC(=O)Nc1ccc(cc1)OCCCN1CCC(CC1)C(c1ccccc1)(c1ccccc1)O			CHEMBL2220848	1	0.535714	0.767857
4-[4-(4-methylpiperazin-1-yl)phenyl]sulfonylaniline	6292954			ChEMBLE_NTD	N-[4-[4-(4-methylpiperazin-1-yl)phenyl]sulfonylphenyl]acetamide	6327198	CN1CCN(CC1)c1ccc(cc1)S(=O)(=O)c1ccc(cc1)NC(=O)C			ChEMBLE_NTD	1	0.535714	0.767857
N-Acetyl-D-mannosamine	1468065130		C00645	CHEMBL3182062	N-[4,5-dihydroxy-6-(hydroxymethyl)-2-(methylthio)-3-oxanyl]acetamide	6290967	CSC1OC(CO)C(C(C1NC(=O)C)O)O			ChEMBLE_NTD	1	0.535714	0.767857
Estrone	1467871230		C00468,D00067	ChEMBLE_NTD,CHEMBL1405,CHEMBL32152,CHEMBL756	N-[4,5-dihydroxy-6-(hydroxymethyl)-2-[(13-methyl-17-oxo-7,8,9,11,12,14,15,16-octahydro-6H-cyclopenta[a]phenanthren-3-yl)oxy]-3-oxanyl]acetamide	48067069	OCC1OC(Oc2ccc3c(c2)CCC2C3CCC3(C2CCC3=O)C)C(C(C1O)O)NC(=O)C			CHEMBL1605386	1	0.535714	0.767857
methyl N-acetyl-alpha-D-galactosaminide	1468161852	DB02612,DB04426,EXPT02108			N-[5-[[4,5-dihydroxy-6-(hydroxymethyl)-3-methoxy-2-oxanyl]oxy]-4-hydroxy-6-(hydroxymethyl)-2-methoxy-3-oxanyl]acetamide	279236934	OCC1OC(OC)C(C(C1OC1OC(CO)C(C(C1OC)O)O)O)NC(=O)C			CHEMBL2303858	1	0.535714	0.767857
(S)-Malate	1467867543		C00149,C00497,C00711,C03668,D04843	CHEMBL1455497,CHEMBL225986	N-Acetyl-D-glucosamine	1467867422	OCC1OC(O)C(C(C1O)O)NC(=O)C	DB03109,EXPT02281	C00140,C00645,C01132,C02711,C03136,C03878,C05021,C20328,C21036,C21039,C21049,C21052,C21061	ChEMBLE_NTD,CHEMBL1210905,CHEMBL1231391,CHEMBL1414815,CHEMBL240524,CHEMBL39064,CHEMBL447878,CHEMBL469447,CHEMBL83479	1	0.535714	0.767857
1-Methylseleno-N-acetyl-D-galactosamine	1468032369		C18893		N-Acetyl-D-glucosamine	1467867422	OCC1OC(O)C(C(C1O)O)NC(=O)C	DB03109,EXPT02281	C00140,C00645,C01132,C02711,C03136,C03878,C05021,C20328,C21036,C21039,C21049,C21052,C21061	ChEMBLE_NTD,CHEMBL1210905,CHEMBL1231391,CHEMBL1414815,CHEMBL240524,CHEMBL39064,CHEMBL447878,CHEMBL469447,CHEMBL83479	1	0.535714	0.767857
1-O-(2-Acetamido-2-deoxy-alpha-D-glucopyranosyl)-1D-myo-inositol 3-phosphate	1468040166		C19761		N-Acetyl-D-glucosamine	1467867422	OCC1OC(O)C(C(C1O)O)NC(=O)C	DB03109,EXPT02281	C00140,C00645,C01132,C02711,C03136,C03878,C05021,C20328,C21036,C21039,C21049,C21052,C21061	ChEMBLE_NTD,CHEMBL1210905,CHEMBL1231391,CHEMBL1414815,CHEMBL240524,CHEMBL39064,CHEMBL447878,CHEMBL469447,CHEMBL83479	1	0.535714	0.767857
1-O-[2-(Acetylamino)-2-deoxy-alpha-D-glucopyranosyl]-D-myo-Inositol	1468040342		C19784	CHEMBL1093122	N-Acetyl-D-glucosamine	1467867422	OCC1OC(O)C(C(C1O)O)NC(=O)C	DB03109,EXPT02281	C00140,C00645,C01132,C02711,C03136,C03878,C05021,C20328,C21036,C21039,C21049,C21052,C21061	ChEMBLE_NTD,CHEMBL1210905,CHEMBL1231391,CHEMBL1414815,CHEMBL240524,CHEMBL39064,CHEMBL447878,CHEMBL469447,CHEMBL83479	1	0.535714	0.767857
2-Dehydro-D-glucose	1467891304		C02779		N-Acetyl-D-glucosamine	1467867422	OCC1OC(O)C(C(C1O)O)NC(=O)C	DB03109,EXPT02281	C00140,C00645,C01132,C02711,C03136,C03878,C05021,C20328,C21036,C21039,C21049,C21052,C21061	ChEMBLE_NTD,CHEMBL1210905,CHEMBL1231391,CHEMBL1414815,CHEMBL240524,CHEMBL39064,CHEMBL447878,CHEMBL469447,CHEMBL83479	1	0.535714	0.767857
2'-N-Acetylparomamine	1468020381		C17582		N-Acetyl-D-glucosamine	1467867422	OCC1OC(O)C(C(C1O)O)NC(=O)C	DB03109,EXPT02281	C00140,C00645,C01132,C02711,C03136,C03878,C05021,C20328,C21036,C21039,C21049,C21052,C21061	ChEMBLE_NTD,CHEMBL1210905,CHEMBL1231391,CHEMBL1414815,CHEMBL240524,CHEMBL39064,CHEMBL447878,CHEMBL469447,CHEMBL83479	1	0.535714	0.767857
4-Deoxy-beta-D-gluc-4-enuronosyl-(1,3)-N-acetyl-D-galactosamine	1467879665		C01310,C04794	ChEMBLE_NTD	N-Acetyl-D-glucosamine	1467867422	OCC1OC(O)C(C(C1O)O)NC(=O)C	DB03109,EXPT02281	C00140,C00645,C01132,C02711,C03136,C03878,C05021,C20328,C21036,C21039,C21049,C21052,C21061	ChEMBLE_NTD,CHEMBL1210905,CHEMBL1231391,CHEMBL1414815,CHEMBL240524,CHEMBL39064,CHEMBL447878,CHEMBL469447,CHEMBL83479	1	0.535714	0.767857
ATP	1467865531	DB00171,EXPT00007,NUTR00017	C00002,D08646	CHEMBL14249	N-Acetyl-D-glucosamine	1467867422	OCC1OC(O)C(C(C1O)O)NC(=O)C	DB03109,EXPT02281	C00140,C00645,C01132,C02711,C03136,C03878,C05021,C20328,C21036,C21039,C21049,C21052,C21061	ChEMBLE_NTD,CHEMBL1210905,CHEMBL1231391,CHEMBL1414815,CHEMBL240524,CHEMBL39064,CHEMBL447878,CHEMBL469447,CHEMBL83479	1	0.535714	0.767857
Chitobiose	1467882468		C01674	CHEMBL1169569,CHEMBL1222104,CHEMBL1222122,CHEMBL3351097,CHEMBL467754	N-Acetyl-D-glucosamine	1467867422	OCC1OC(O)C(C(C1O)O)NC(=O)C	DB03109,EXPT02281	C00140,C00645,C01132,C02711,C03136,C03878,C05021,C20328,C21036,C21039,C21049,C21052,C21061	ChEMBLE_NTD,CHEMBL1210905,CHEMBL1231391,CHEMBL1414815,CHEMBL240524,CHEMBL39064,CHEMBL447878,CHEMBL469447,CHEMBL83479	1	0.535714	0.767857
CMP	1467866276		C00055	CHEMBL1329786,CHEMBL296272,CHEMBL307679,CHEMBL596186	N-Acetyl-D-glucosamine	1467867422	OCC1OC(O)C(C(C1O)O)NC(=O)C	DB03109,EXPT02281	C00140,C00645,C01132,C02711,C03136,C03878,C05021,C20328,C21036,C21039,C21049,C21052,C21061	ChEMBLE_NTD,CHEMBL1210905,CHEMBL1231391,CHEMBL1414815,CHEMBL240524,CHEMBL39064,CHEMBL447878,CHEMBL469447,CHEMBL83479	1	0.535714	0.767857
D-Glucosamine	1467869737		C00329,C02262,C03570,C08349,C21035,C21038,C21048,C21051,C21060,D04334	ChEMBLE MALARIA,CHEMBL234432,CHEMBL3304228,CHEMBL493287,CHEMBL606759	N-Acetyl-D-glucosamine	1467867422	OCC1OC(O)C(C(C1O)O)NC(=O)C	DB03109,EXPT02281	C00140,C00645,C01132,C02711,C03136,C03878,C05021,C20328,C21036,C21039,C21049,C21052,C21061	ChEMBLE_NTD,CHEMBL1210905,CHEMBL1231391,CHEMBL1414815,CHEMBL240524,CHEMBL39064,CHEMBL447878,CHEMBL469447,CHEMBL83479	1	0.535714	0.767857
D-Glucose	1467865936	DB02379,EXPT00455,EXPT00685,EXPT01603	C00031,C00124,C00159,C00221,C00267,C00737,C00738,C00936,C00962,C00984,C01487,C01825,C02209,C06464,C06465,C06466,C06467,C15923,C21032,C21050,D00009	CHEMBL103010,CHEMBL1222152,CHEMBL1222250,CHEMBL1233058,CHEMBL1453070,CHEMBL1519430,CHEMBL1614854,CHEMBL1873035,CHEMBL195923,CHEMBL2093058,CHEMBL2115552,CHEMBL300520,CHEMBL3186423,CHEMBL365590,CHEMBL423707,CHEMBL469448,CHEMBL98182	N-Acetyl-D-glucosamine	1467867422	OCC1OC(O)C(C(C1O)O)NC(=O)C	DB03109,EXPT02281	C00140,C00645,C01132,C02711,C03136,C03878,C05021,C20328,C21036,C21039,C21049,C21052,C21061	ChEMBLE_NTD,CHEMBL1210905,CHEMBL1231391,CHEMBL1414815,CHEMBL240524,CHEMBL39064,CHEMBL447878,CHEMBL469447,CHEMBL83479	1	0.535714	0.767857
IDP	1467866932		C00104	CHEMBL1233551	N-Acetyl-D-glucosamine	1467867422	OCC1OC(O)C(C(C1O)O)NC(=O)C	DB03109,EXPT02281	C00140,C00645,C01132,C02711,C03136,C03878,C05021,C20328,C21036,C21039,C21049,C21052,C21061	ChEMBLE_NTD,CHEMBL1210905,CHEMBL1231391,CHEMBL1414815,CHEMBL240524,CHEMBL39064,CHEMBL447878,CHEMBL469447,CHEMBL83479	1	0.535714	0.767857
Lacto-N-biose	1467917204		C06372,C07278	CHEMBL2303675,CHEMBL443119,CHEMBL469451	N-Acetyl-D-glucosamine	1467867422	OCC1OC(O)C(C(C1O)O)NC(=O)C	DB03109,EXPT02281	C00140,C00645,C01132,C02711,C03136,C03878,C05021,C20328,C21036,C21039,C21049,C21052,C21061	ChEMBLE_NTD,CHEMBL1210905,CHEMBL1231391,CHEMBL1414815,CHEMBL240524,CHEMBL39064,CHEMBL447878,CHEMBL469447,CHEMBL83479	1	0.535714	0.767857
Muramic acid	1467918133		C06470		N-Acetyl-D-glucosamine	1467867422	OCC1OC(O)C(C(C1O)O)NC(=O)C	DB03109,EXPT02281	C00140,C00645,C01132,C02711,C03136,C03878,C05021,C20328,C21036,C21039,C21049,C21052,C21061	ChEMBLE_NTD,CHEMBL1210905,CHEMBL1231391,CHEMBL1414815,CHEMBL240524,CHEMBL39064,CHEMBL447878,CHEMBL469447,CHEMBL83479	1	0.535714	0.767857
N-Acetyl-beta-D-glucosaminyl-(1->4)-D-glucosamine	1468208870		C21747		N-Acetyl-D-glucosamine	1467867422	OCC1OC(O)C(C(C1O)O)NC(=O)C	DB03109,EXPT02281	C00140,C00645,C01132,C02711,C03136,C03878,C05021,C20328,C21036,C21039,C21049,C21052,C21061	ChEMBLE_NTD,CHEMBL1210905,CHEMBL1231391,CHEMBL1414815,CHEMBL240524,CHEMBL39064,CHEMBL447878,CHEMBL469447,CHEMBL83479	1	0.535714	0.767857
N-Acetyl-D-fucosamine	1468001761		C15480,C15481,C21046,C21056		N-Acetyl-D-glucosamine	1467867422	OCC1OC(O)C(C(C1O)O)NC(=O)C	DB03109,EXPT02281	C00140,C00645,C01132,C02711,C03136,C03878,C05021,C20328,C21036,C21039,C21049,C21052,C21061	ChEMBLE_NTD,CHEMBL1210905,CHEMBL1231391,CHEMBL1414815,CHEMBL240524,CHEMBL39064,CHEMBL447878,CHEMBL469447,CHEMBL83479	1	0.535714	0.767857
N-Acetyl-D-glucosaminate	1467878001		C01133		N-Acetyl-D-glucosamine	1467867422	OCC1OC(O)C(C(C1O)O)NC(=O)C	DB03109,EXPT02281	C00140,C00645,C01132,C02711,C03136,C03878,C05021,C20328,C21036,C21039,C21049,C21052,C21061	ChEMBLE_NTD,CHEMBL1210905,CHEMBL1231391,CHEMBL1414815,CHEMBL240524,CHEMBL39064,CHEMBL447878,CHEMBL469447,CHEMBL83479	1	0.535714	0.767857
N-Acetyl-D-glucosamine 1-phosphate	1467901708		C04256,C04501,C18055,C18060		N-Acetyl-D-glucosamine	1467867422	OCC1OC(O)C(C(C1O)O)NC(=O)C	DB03109,EXPT02281	C00140,C00645,C01132,C02711,C03136,C03878,C05021,C20328,C21036,C21039,C21049,C21052,C21061	ChEMBLE_NTD,CHEMBL1210905,CHEMBL1231391,CHEMBL1414815,CHEMBL240524,CHEMBL39064,CHEMBL447878,CHEMBL469447,CHEMBL83479	1	0.535714	0.767857
N-Acetyl-D-glucosamine 6-phosphate	1467870068		C00357,C04257,C06376		N-Acetyl-D-glucosamine	1467867422	OCC1OC(O)C(C(C1O)O)NC(=O)C	DB03109,EXPT02281	C00140,C00645,C01132,C02711,C03136,C03878,C05021,C20328,C21036,C21039,C21049,C21052,C21061	ChEMBLE_NTD,CHEMBL1210905,CHEMBL1231391,CHEMBL1414815,CHEMBL240524,CHEMBL39064,CHEMBL447878,CHEMBL469447,CHEMBL83479	1	0.535714	0.767857
N-Acetyl-D-glucosamine 6-sulfate	1467900865	DB02186,EXPT02335	C04132,C04255		N-Acetyl-D-glucosamine	1467867422	OCC1OC(O)C(C(C1O)O)NC(=O)C	DB03109,EXPT02281	C00140,C00645,C01132,C02711,C03136,C03878,C05021,C20328,C21036,C21039,C21049,C21052,C21061	ChEMBLE_NTD,CHEMBL1210905,CHEMBL1231391,CHEMBL1414815,CHEMBL240524,CHEMBL39064,CHEMBL447878,CHEMBL469447,CHEMBL83479	1	0.535714	0.767857
N-Acetyl-D-mannosamine	1468065130		C00645	CHEMBL3182062	N-Acetyl-D-glucosamine	1467867422	OCC1OC(O)C(C(C1O)O)NC(=O)C	DB03109,EXPT02281	C00140,C00645,C01132,C02711,C03136,C03878,C05021,C20328,C21036,C21039,C21049,C21052,C21061	ChEMBLE_NTD,CHEMBL1210905,CHEMBL1231391,CHEMBL1414815,CHEMBL240524,CHEMBL39064,CHEMBL447878,CHEMBL469447,CHEMBL83479	1	0.535714	0.767857
N-Acetyl-D-mannosaminolactone	1467898430		C03776		N-Acetyl-D-glucosamine	1467867422	OCC1OC(O)C(C(C1O)O)NC(=O)C	DB03109,EXPT02281	C00140,C00645,C01132,C02711,C03136,C03878,C05021,C20328,C21036,C21039,C21049,C21052,C21061	ChEMBLE_NTD,CHEMBL1210905,CHEMBL1231391,CHEMBL1414815,CHEMBL240524,CHEMBL39064,CHEMBL447878,CHEMBL469447,CHEMBL83479	1	0.535714	0.767857
N-Acetylgalactosaminate	1467895858		C03408		N-Acetyl-D-glucosamine	1467867422	OCC1OC(O)C(C(C1O)O)NC(=O)C	DB03109,EXPT02281	C00140,C00645,C01132,C02711,C03136,C03878,C05021,C20328,C21036,C21039,C21049,C21052,C21061	ChEMBLE_NTD,CHEMBL1210905,CHEMBL1231391,CHEMBL1414815,CHEMBL240524,CHEMBL39064,CHEMBL447878,CHEMBL469447,CHEMBL83479	1	0.535714	0.767857
N-Acetylglucosamine 4-sulfate	1467899571	DB04492,EXPT02336	C03953,C16265		N-Acetyl-D-glucosamine	1467867422	OCC1OC(O)C(C(C1O)O)NC(=O)C	DB03109,EXPT02281	C00140,C00645,C01132,C02711,C03136,C03878,C05021,C20328,C21036,C21039,C21049,C21052,C21061	ChEMBLE_NTD,CHEMBL1210905,CHEMBL1231391,CHEMBL1414815,CHEMBL240524,CHEMBL39064,CHEMBL447878,CHEMBL469447,CHEMBL83479	1	0.535714	0.767857
N-Acetyllactosamine	1467872809		C00611,C20887	CHEMBL457432	N-Acetyl-D-glucosamine	1467867422	OCC1OC(O)C(C(C1O)O)NC(=O)C	DB03109,EXPT02281	C00140,C00645,C01132,C02711,C03136,C03878,C05021,C20328,C21036,C21039,C21049,C21052,C21061	ChEMBLE_NTD,CHEMBL1210905,CHEMBL1231391,CHEMBL1414815,CHEMBL240524,CHEMBL39064,CHEMBL447878,CHEMBL469447,CHEMBL83479	1	0.535714	0.767857
N-Acetylmuramate	1467890798		C02713	ChEMBLE_NTD,CHEMBL1597841	N-Acetyl-D-glucosamine	1467867422	OCC1OC(O)C(C(C1O)O)NC(=O)C	DB03109,EXPT02281	C00140,C00645,C01132,C02711,C03136,C03878,C05021,C20328,C21036,C21039,C21049,C21052,C21061	ChEMBLE_NTD,CHEMBL1210905,CHEMBL1231391,CHEMBL1414815,CHEMBL240524,CHEMBL39064,CHEMBL447878,CHEMBL469447,CHEMBL83479	1	0.535714	0.767857
N-Acetylneuraminate	1467869128	DB01894,DB02344,DB03721,EXPT02292,EXPT02908,EXPT02909	C00270,C19909,C19910	CHEMBL109645,CHEMBL112030,CHEMBL1234621,CHEMBL152452,CHEMBL165084,CHEMBL307262,CHEMBL3138670,CHEMBL3187768	N-Acetyl-D-glucosamine	1467867422	OCC1OC(O)C(C(C1O)O)NC(=O)C	DB03109,EXPT02281	C00140,C00645,C01132,C02711,C03136,C03878,C05021,C20328,C21036,C21039,C21049,C21052,C21061	ChEMBLE_NTD,CHEMBL1210905,CHEMBL1231391,CHEMBL1414815,CHEMBL240524,CHEMBL39064,CHEMBL447878,CHEMBL469447,CHEMBL83479	1	0.535714	0.767857
N-Glycolyl-D-glucosamine	1467894040		C03146,C03521		N-Acetyl-D-glucosamine	1467867422	OCC1OC(O)C(C(C1O)O)NC(=O)C	DB03109,EXPT02281	C00140,C00645,C01132,C02711,C03136,C03878,C05021,C20328,C21036,C21039,C21049,C21052,C21061	ChEMBLE_NTD,CHEMBL1210905,CHEMBL1231391,CHEMBL1414815,CHEMBL240524,CHEMBL39064,CHEMBL447878,CHEMBL469447,CHEMBL83479	1	0.535714	0.767857
N4-(Acetyl-beta-D-glucosaminyl)asparagine	1467903694		C04540		N-Acetyl-D-glucosamine	1467867422	OCC1OC(O)C(C(C1O)O)NC(=O)C	DB03109,EXPT02281	C00140,C00645,C01132,C02711,C03136,C03878,C05021,C20328,C21036,C21039,C21049,C21052,C21061	ChEMBLE_NTD,CHEMBL1210905,CHEMBL1231391,CHEMBL1414815,CHEMBL240524,CHEMBL39064,CHEMBL447878,CHEMBL469447,CHEMBL83479	1	0.535714	0.767857
O-(N-acetyl-alpha-D-galactosaminyl)-L-serine	1468095622	DB02397,EXPT03081		CHEMBL1236347	N-Acetyl-D-glucosamine	1467867422	OCC1OC(O)C(C(C1O)O)NC(=O)C	DB03109,EXPT02281	C00140,C00645,C01132,C02711,C03136,C03878,C05021,C20328,C21036,C21039,C21049,C21052,C21061	ChEMBLE_NTD,CHEMBL1210905,CHEMBL1231391,CHEMBL1414815,CHEMBL240524,CHEMBL39064,CHEMBL447878,CHEMBL469447,CHEMBL83479	1	0.535714	0.767857
N-Acetylmuramate	1467890798		C02713	ChEMBLE_NTD,CHEMBL1597841	N-acetylmuramoyl-L-ala-D-glu	1469331341	OCC1OC(O)C(C(C1O)OC(C(=O)NC(C(=O)NC(C(=O)[O-])CCC(=O)[O-])C)C)NC(=O)C			CHEMBL170440,CHEMBL171357	1	0.535714	0.767857
N-Acetylmuramoyl-Ala	1467892918		C02999		N-acetylmuramoyl-L-ala-D-glu	1469331341	OCC1OC(O)C(C(C1O)OC(C(=O)NC(C(=O)NC(C(=O)[O-])CCC(=O)[O-])C)C)NC(=O)C			CHEMBL170440,CHEMBL171357	1	0.535714	0.767857
UDP-N-acetylmuramoyl-L-alanyl-D-glutamate	1467873594	DB02314,EXPT03165	C00692		N-acetylmuramoyl-L-ala-D-glu	1469331341	OCC1OC(O)C(C(C1O)OC(C(=O)NC(C(=O)NC(C(=O)[O-])CCC(=O)[O-])C)C)NC(=O)C			CHEMBL170440,CHEMBL171357	1	0.535714	0.767857
N-Acetyl-D-glucosamine	1467867422	DB03109,EXPT02281	C00140,C00645,C01132,C02711,C03136,C03878,C05021,C20328,C21036,C21039,C21049,C21052,C21061	ChEMBLE_NTD,CHEMBL1210905,CHEMBL1231391,CHEMBL1414815,CHEMBL240524,CHEMBL39064,CHEMBL447878,CHEMBL469447,CHEMBL83479	N,N-dimethylcarbamodithioic acid [(2S,3R,4R,5R,6R)-3-acetamido-4,5-dihydroxy-6-(hydroxymethyl)-2-oxanyl] ester	280649426	OCC1OC(SC(=S)N(C)C)C(C(C1O)O)NC(=O)C			CHEMBL567262,CHEMBL567307,CHEMBL569459	1	0.535714	0.767857
L-Threonine O-3-phosphate	1467977585	DB02482,EXPT03092	C12147	CHEMBL1742182,CHEMBL369507	O-(N-acetyl-alpha-D-galactosaminyl)-L-threonine	1468188627	OCC1OC(OC(C(C(=O)O)N)C)C(C(C1O)O)NC(=O)C			CHEMBL1236350	1	0.535714	0.767857
N-Acetyl-D-glucosamine 1-phosphate	1467901708		C04256,C04501,C18055,C18060		O-(N-acetyl-alpha-D-galactosaminyl)-L-threonine	1468188627	OCC1OC(OC(C(C(=O)O)N)C)C(C(C1O)O)NC(=O)C			CHEMBL1236350	1	0.535714	0.767857
N-Acetyl-D-mannosamine	1468065130		C00645	CHEMBL3182062	O-(N-acetyl-alpha-D-galactosaminyl)-L-threonine	1468188627	OCC1OC(OC(C(C(=O)O)N)C)C(C(C1O)O)NC(=O)C			CHEMBL1236350	1	0.535714	0.767857
O-(N-acetyl-alpha-D-galactosaminyl)-L-serine	1468095622	DB02397,EXPT03081		CHEMBL1236347	O-(N-acetyl-alpha-D-galactosaminyl)-L-threonine	1468188627	OCC1OC(OC(C(C(=O)O)N)C)C(C(C1O)O)NC(=O)C			CHEMBL1236350	1	0.535714	0.767857
Acetaldehyde	1467866648		C00084	CHEMBL170365	Phenacetin	1467928107	CCOc1ccc(cc1)NC(=O)C		C07591,D00569	ChEMBLE_NTD,CHEMBL16073	1	0.535714	0.767857
Acetate	1467865967	DB03166,DB04184,EXPT00423	C00033,D00010	CHEMBL539	Phenacetin	1467928107	CCOc1ccc(cc1)NC(=O)C		C07591,D00569	ChEMBLE_NTD,CHEMBL16073	1	0.535714	0.767857
Ethanol	1467871246		C00469,D00068	CHEMBL545	Phenacetin	1467928107	CCOc1ccc(cc1)NC(=O)C		C07591,D00569	ChEMBLE_NTD,CHEMBL16073	1	0.535714	0.767857
1-(4-aminophenoxy)-3-(isopropylamino)propan-2-ol	2784707			ChEMBLE_NTD,CHEMBL1160715	Practolol	1467972878	OC(COc1ccc(cc1)NC(=O)C)CNC(C)C		C11696,D05587	ChEMBLE_NTD,CHEMBL1358416,CHEMBL6995	1	0.535714	0.767857
N-Acetylmuramoyl-Ala	1467892918		C02999		propyl (2R)-2-[[(2S)-2-[2-[(2S,3R,4R,5S,6R)-3-acetamido-2,5-dihydroxy-6-(hydroxymethyl)tetrahydropyran-4-yl]oxypropanoylamino]propanoyl]amino]-5-amino-5-oxo-pentanoate	2448877	CCCOC(=O)C(NC(=O)C(NC(=O)C(OC1C(O)C(CO)OC(C1NC(=O)C)O)C)C)CCC(=O)N			CHEMBL354768	1	0.535714	0.767857
N-(4-sulfanylphenyl)acetamide	701957			ChEMBLE_NTD,CHEMBL120794	S-(4-acetamidophenyl) 6-formylpyridine-2-carbothioate	279763337	O=Cc1cccc(n1)C(=O)Sc1ccc(cc1)NC(=O)C			CHEMBL155908	1	0.535714	0.767857
(9Z)-octadecen-1-ol	1468283119		D05245	CHEMBL2105350	sulfuric acid [(2R,3R,4R,5R,6S)-5-acetamido-3-hydroxy-2-(hydroxymethyl)-6-[(Z)-octadec-9-enoxy]-4-oxanyl] ester	131454075	CCCCCCCCC=CCCCCCCCCOC1OC(CO)C(C(C1NC(=O)C)OS(=O)(=O)O)O			CHEMBL1207750	1	0.535714	0.767857
(9Z)-octadecen-1-ol	1468283119		D05245	CHEMBL2105350	sulfuric acid [(2R,3S,4R,5R,6S)-5-acetamido-3,4-dihydroxy-6-[(Z)-octadec-9-enoxy]-2-oxanyl]methyl ester	131454130	CCCCCCCCC=CCCCCCCCCOC1OC(COS(=O)(=O)O)C(C(C1NC(=O)C)O)O			CHEMBL1207246	1	0.535714	0.767857
N-Acetyl-D-glucosamine 6-sulfate	1467900865	DB02186,EXPT02335	C04132,C04255		sulfuric acid [(2R,3S,4R,5R,6S)-5-acetamido-3,4-dihydroxy-6-[(Z)-octadec-9-enoxy]-2-oxanyl]methyl ester	131454130	CCCCCCCCC=CCCCCCCCCOC1OC(COS(=O)(=O)O)C(C(C1NC(=O)C)O)O			CHEMBL1207246	1	0.535714	0.767857
Teicoplanin A2-2	1467976562		C12046	CHEMBL2105779,CHEMBL2368011	Teicoplanin A2-4	1467983927	CCC(CCCCCCC(=O)NC1C(OC(C(C1O)O)CO)Oc1c2cc3cc1Oc1ccc(cc1Cl)CC1C(=O)NC(C(=O)NC3C(=O)NC3C(=O)NC(C(c4ccc(O2)c(Cl)c4)OC2OC(CO)C(C(C2NC(=O)C)O)O)C(=O)NC(c2c(c4cc3ccc4O)c(cc(c2)O)OC2OC(CO)C(C(C2O)O)O)C(=O)O)c2cc(O)cc(c2)Oc2cc(C(C(=O)N1)N)ccc2O)C		C13610	CHEMBL2105818	1	0.535714	0.767857
Teicoplanin A2-3	1467983906		C13588	CHEMBL2103913,CHEMBL2367878	Teicoplanin A2-4	1467983927	CCC(CCCCCCC(=O)NC1C(OC(C(C1O)O)CO)Oc1c2cc3cc1Oc1ccc(cc1Cl)CC1C(=O)NC(C(=O)NC3C(=O)NC3C(=O)NC(C(c4ccc(O2)c(Cl)c4)OC2OC(CO)C(C(C2NC(=O)C)O)O)C(=O)NC(c2c(c4cc3ccc4O)c(cc(c2)O)OC2OC(CO)C(C(C2O)O)O)C(=O)O)c2cc(O)cc(c2)Oc2cc(C(C(=O)N1)N)ccc2O)C		C13610	CHEMBL2105818	1	0.535714	0.767857
Teicoplanin A2-3	1467983906		C13588	CHEMBL2103913,CHEMBL2367878	Teicoplanin A2-5	1467983938	OCC1OC(Oc2c3cc4cc2Oc2ccc(cc2Cl)CC2C(=O)NC(C(=O)NC4C(=O)NC4C(=O)NC(C(c5ccc(O3)c(Cl)c5)OC3OC(CO)C(C(C3NC(=O)C)O)O)C(=O)NC(c3c(c5cc4ccc5O)c(cc(c3)O)OC3OC(CO)C(C(C3O)O)O)C(=O)O)c3cc(O)cc(c3)Oc3cc(C(C(=O)N2)N)ccc3O)C(C(C1O)O)NC(=O)CCCCCCCC(C)C		C13612	CHEMBL2103966,CHEMBL3348961	1	0.535714	0.767857
Teicoplanin A2-3	1467983906		C13588	CHEMBL2103913,CHEMBL2367878	Teicoplanin A3-1	1467983949	OCC1OC(OC2c3ccc(c(c3)Cl)Oc3cc4C(C(=O)NC5C(=O)NC2C(=O)NC(C(=O)O)c2cc(O)cc(c2c2cc5ccc2O)OC2OC(CO)C(C(C2O)O)O)NC(=O)C2NC(=O)C(Cc5ccc(Oc(c3O)c4)c(Cl)c5)NC(=O)C(N)c3cc(Oc4cc2cc(O)c4)c(O)cc3)C(C(C1O)O)NC(=O)C		C13613	CHEMBL2105780,CHEMBL2367634	1	0.535714	0.767857
UDP-N-acetylmuramate	1467877216		C01050		UDP-N-acetyl-3-(1-carboxyvinyl)-D-glucosamine	1467904382	OCC1OC(OP(=O)(OP(=O)(OCC2OC(C(C2O)O)n2ccc(=O)[nH]c2=O)O)O)C(C(C1O)OC(=C)C(=O)O)NC(=O)C		C04631	ChEMBLE_NTD	1	0.535714	0.767857
UDP-N-acetyl-D-galactosamine 4-sulfate	1467902884		C04426		UDP-N-acetyl-D-galactosamine 4,6-bissulfate	1467904102	CC(=O)NC1C(OC(C(C1O)OS(=O)(=O)O)COS(=O)(=O)O)OP(=O)(OP(=O)(OCC1OC(C(C1O)O)n1ccc(=O)[nH]c1=O)O)O		C04589	ChEMBLE_NTD	1	0.535714	0.767857
ATP	1467865531	DB00171,EXPT00007,NUTR00017	C00002,D08646	CHEMBL14249	UDP-N-acetylmuramoyl-L-alanyl-alpha-D-glutamyl-L-lysine	1467904948	NCCCCC(C(=O)O)NC(=O)C(NC(=O)C(NC(=O)C(OC1C(O)C(CO)OC(C1NC(=O)C)OP(=O)(OP(=O)(OCC1OC(C(C1O)O)n1ccc(=O)[nH]c1=O)O)O)C)C)CCC(=O)O		C04700	ChEMBLE_NTD	1	0.535714	0.767857
D-Alanyl-D-alanine	1467876684		C00993	CHEMBL17697,CHEMBL1814487,CHEMBL1814491,CHEMBL299420,CHEMBL52461	UDP-N-acetylmuramoyl-L-alanyl-alpha-D-glutamyl-L-lysine	1467904948	NCCCCC(C(=O)O)NC(=O)C(NC(=O)C(NC(=O)C(OC1C(O)C(CO)OC(C1NC(=O)C)OP(=O)(OP(=O)(OCC1OC(C(C1O)O)n1ccc(=O)[nH]c1=O)O)O)C)C)CCC(=O)O		C04700	ChEMBLE_NTD	1	0.535714	0.767857
UDP-N-acetylmuramate	1467877216		C01050		UDP-N-acetylmuramoyl-L-alanyl-alpha-D-glutamyl-L-lysine	1467904948	NCCCCC(C(=O)O)NC(=O)C(NC(=O)C(NC(=O)C(OC1C(O)C(CO)OC(C1NC(=O)C)OP(=O)(OP(=O)(OCC1OC(C(C1O)O)n1ccc(=O)[nH]c1=O)O)O)C)C)CCC(=O)O		C04700	ChEMBLE_NTD	1	0.535714	0.767857
UDP-N-acetylmuramoyl-L-alanine	1467878766	DB01673,EXPT03184	C01212		UDP-N-acetylmuramoyl-L-alanyl-alpha-D-glutamyl-L-lysine	1467904948	NCCCCC(C(=O)O)NC(=O)C(NC(=O)C(NC(=O)C(OC1C(O)C(CO)OC(C1NC(=O)C)OP(=O)(OP(=O)(OCC1OC(C(C1O)O)n1ccc(=O)[nH]c1=O)O)O)C)C)CCC(=O)O		C04700	ChEMBLE_NTD	1	0.535714	0.767857
UDP-N-acetylmuramoyl-L-alanyl-D-glutamate	1467873594	DB02314,EXPT03165	C00692		UDP-N-acetylmuramoyl-L-alanyl-alpha-D-glutamyl-L-lysine	1467904948	NCCCCC(C(=O)O)NC(=O)C(NC(=O)C(NC(=O)C(OC1C(O)C(CO)OC(C1NC(=O)C)OP(=O)(OP(=O)(OCC1OC(C(C1O)O)n1ccc(=O)[nH]c1=O)O)O)C)C)CCC(=O)O		C04700	ChEMBLE_NTD	1	0.535714	0.767857
UDPMurNAc(oyl-L-Ala-D-gamma-Glu-L-Lys-D-Ala-D-Ala)	1467904958		C04702		UDP-N-acetylmuramoyl-L-alanyl-alpha-D-glutamyl-L-lysine	1467904948	NCCCCC(C(=O)O)NC(=O)C(NC(=O)C(NC(=O)C(OC1C(O)C(CO)OC(C1NC(=O)C)OP(=O)(OP(=O)(OCC1OC(C(C1O)O)n1ccc(=O)[nH]c1=O)O)O)C)C)CCC(=O)O		C04700	ChEMBLE_NTD	1	0.535714	0.767857
UDPMurNAc(oyl-L-Ala-gamma-D-Glu-L-Lys-D-Ala-D-Ser)	1468048543		C20873		UDP-N-acetylmuramoyl-L-alanyl-alpha-D-glutamyl-L-lysine	1467904948	NCCCCC(C(=O)O)NC(=O)C(NC(=O)C(NC(=O)C(OC1C(O)C(CO)OC(C1NC(=O)C)OP(=O)(OP(=O)(OCC1OC(C(C1O)O)n1ccc(=O)[nH]c1=O)O)O)C)C)CCC(=O)O		C04700	ChEMBLE_NTD	1	0.535714	0.767857
UMP	1467866945		C00105	CHEMBL214393,CHEMBL603336	UDP-N-acetylmuramoyl-L-alanyl-alpha-D-glutamyl-L-lysine	1467904948	NCCCCC(C(=O)O)NC(=O)C(NC(=O)C(NC(=O)C(OC1C(O)C(CO)OC(C1NC(=O)C)OP(=O)(OP(=O)(OCC1OC(C(C1O)O)n1ccc(=O)[nH]c1=O)O)O)C)C)CCC(=O)O		C04700	ChEMBLE_NTD	1	0.535714	0.767857
ATP	1467865531	DB00171,EXPT00007,NUTR00017	C00002,D08646	CHEMBL14249	UDP-N-acetylmuramoyl-L-alanyl-gamma-D-glutamyl-L-lysine	1467912980	OCC1OC(OP(=O)(OP(=O)(OCC2OC(C(C2O)O)n2ccc(=O)[nH]c2=O)[O-])[O-])C(C(C1O)OC(C(=O)NC(C(=O)NC(C(=O)[O-])CCC(=O)NC(C(=O)[O-])CCCC[N+])C)C)NC(=O)C		C05892	CHEMBL1777829	1	0.535714	0.767857
D-Alanyl-D-alanine	1467876684		C00993	CHEMBL17697,CHEMBL1814487,CHEMBL1814491,CHEMBL299420,CHEMBL52461	UDP-N-acetylmuramoyl-L-alanyl-gamma-D-glutamyl-L-lysine	1467912980	OCC1OC(OP(=O)(OP(=O)(OCC2OC(C(C2O)O)n2ccc(=O)[nH]c2=O)[O-])[O-])C(C(C1O)OC(C(=O)NC(C(=O)NC(C(=O)[O-])CCC(=O)NC(C(=O)[O-])CCCC[N+])C)C)NC(=O)C		C05892	CHEMBL1777829	1	0.535714	0.767857
UDP-N-acetylmuramate	1467877216		C01050		UDP-N-acetylmuramoyl-L-alanyl-gamma-D-glutamyl-L-lysine	1467912980	OCC1OC(OP(=O)(OP(=O)(OCC2OC(C(C2O)O)n2ccc(=O)[nH]c2=O)[O-])[O-])C(C(C1O)OC(C(=O)NC(C(=O)NC(C(=O)[O-])CCC(=O)NC(C(=O)[O-])CCCC[N+])C)C)NC(=O)C		C05892	CHEMBL1777829	1	0.535714	0.767857
UDP-N-acetylmuramoyl-L-alanine	1467878766	DB01673,EXPT03184	C01212		UDP-N-acetylmuramoyl-L-alanyl-gamma-D-glutamyl-L-lysine	1467912980	OCC1OC(OP(=O)(OP(=O)(OCC2OC(C(C2O)O)n2ccc(=O)[nH]c2=O)[O-])[O-])C(C(C1O)OC(C(=O)NC(C(=O)NC(C(=O)[O-])CCC(=O)NC(C(=O)[O-])CCCC[N+])C)C)NC(=O)C		C05892	CHEMBL1777829	1	0.535714	0.767857
UDP-N-acetylmuramoyl-L-alanyl-D-glutamate	1467873594	DB02314,EXPT03165	C00692		UDP-N-acetylmuramoyl-L-alanyl-gamma-D-glutamyl-L-lysine	1467912980	OCC1OC(OP(=O)(OP(=O)(OCC2OC(C(C2O)O)n2ccc(=O)[nH]c2=O)[O-])[O-])C(C(C1O)OC(C(=O)NC(C(=O)NC(C(=O)[O-])CCC(=O)NC(C(=O)[O-])CCCC[N+])C)C)NC(=O)C		C05892	CHEMBL1777829	1	0.535714	0.767857
UDP-N-acetylmuramoyl-L-alanyl-D-glutamyl-L-lysyl-D-alanine	1467917778		C06432		UDP-N-acetylmuramoyl-L-alanyl-gamma-D-glutamyl-L-lysine	1467912980	OCC1OC(OP(=O)(OP(=O)(OCC2OC(C(C2O)O)n2ccc(=O)[nH]c2=O)[O-])[O-])C(C(C1O)OC(C(=O)NC(C(=O)NC(C(=O)[O-])CCC(=O)NC(C(=O)[O-])CCCC[N+])C)C)NC(=O)C		C05892	CHEMBL1777829	1	0.535714	0.767857
UDP-N-acetylmuramoyl-L-alanyl-gamma-D-glutamyl-meso-2,6-diaminopimelate	1467906255		C04877,C20886	CHEMBL1779332	UDP-N-acetylmuramoyl-L-alanyl-gamma-D-glutamyl-L-lysine	1467912980	OCC1OC(OP(=O)(OP(=O)(OCC2OC(C(C2O)O)n2ccc(=O)[nH]c2=O)[O-])[O-])C(C(C1O)OC(C(=O)NC(C(=O)NC(C(=O)[O-])CCC(=O)NC(C(=O)[O-])CCCC[N+])C)C)NC(=O)C		C05892	CHEMBL1777829	1	0.535714	0.767857
UDPMurNAc(oyl-L-Ala-D-gamma-Glu-L-Lys-D-Ala-D-Ala)	1467904958		C04702		UDP-N-acetylmuramoyl-L-alanyl-gamma-D-glutamyl-L-lysine	1467912980	OCC1OC(OP(=O)(OP(=O)(OCC2OC(C(C2O)O)n2ccc(=O)[nH]c2=O)[O-])[O-])C(C(C1O)OC(C(=O)NC(C(=O)NC(C(=O)[O-])CCC(=O)NC(C(=O)[O-])CCCC[N+])C)C)NC(=O)C		C05892	CHEMBL1777829	1	0.535714	0.767857
UDPMurNAc(oyl-L-Ala-gamma-D-Glu-L-Lys-D-Ala-D-Lac)	1468048513		C20869		UDP-N-acetylmuramoyl-L-alanyl-gamma-D-glutamyl-L-lysine	1467912980	OCC1OC(OP(=O)(OP(=O)(OCC2OC(C(C2O)O)n2ccc(=O)[nH]c2=O)[O-])[O-])C(C(C1O)OC(C(=O)NC(C(=O)NC(C(=O)[O-])CCC(=O)NC(C(=O)[O-])CCCC[N+])C)C)NC(=O)C		C05892	CHEMBL1777829	1	0.535714	0.767857
UDPMurNAc(oyl-L-Ala-gamma-D-Glu-L-Lys-D-Ala-D-Ser)	1468048543		C20873		UDP-N-acetylmuramoyl-L-alanyl-gamma-D-glutamyl-L-lysine	1467912980	OCC1OC(OP(=O)(OP(=O)(OCC2OC(C(C2O)O)n2ccc(=O)[nH]c2=O)[O-])[O-])C(C(C1O)OC(C(=O)NC(C(=O)NC(C(=O)[O-])CCC(=O)NC(C(=O)[O-])CCCC[N+])C)C)NC(=O)C		C05892	CHEMBL1777829	1	0.535714	0.767857
ATP	1467865531	DB00171,EXPT00007,NUTR00017	C00002,D08646	CHEMBL14249	UDP-N-acetylmuramoyl-L-alanyl-gamma-D-glutamyl-meso-2,6-diaminopimelate	1467906255	OCC1OC(OP(=O)(OP(=O)(OCC2OC(C(C2O)O)n2ccc(=O)[nH]c2=O)[O-])[O-])C(C(C1O)OC(C(=O)NC(C(=O)NC(C(=O)[O-])CCC(=O)NC(C(=O)[O-])CCCC(C(=O)[O-])[N+])C)C)NC(=O)C		C04877,C20886	CHEMBL1779332	1	0.535714	0.767857
N6-(UDP-N-acetyl-alpha-D-muramoyl-L-alanyl-gamma-D-glutamyl)-D-lysine	1468039835		C19720		UDP-N-acetylmuramoyl-L-alanyl-gamma-D-glutamyl-meso-2,6-diaminopimelate	1467906255	OCC1OC(OP(=O)(OP(=O)(OCC2OC(C(C2O)O)n2ccc(=O)[nH]c2=O)[O-])[O-])C(C(C1O)OC(C(=O)NC(C(=O)NC(C(=O)[O-])CCC(=O)NC(C(=O)[O-])CCCC(C(=O)[O-])[N+])C)C)NC(=O)C		C04877,C20886	CHEMBL1779332	1	0.535714	0.767857
UDP-N-acetylmuramate	1467877216		C01050		UDP-N-acetylmuramoyl-L-alanyl-gamma-D-glutamyl-meso-2,6-diaminopimelate	1467906255	OCC1OC(OP(=O)(OP(=O)(OCC2OC(C(C2O)O)n2ccc(=O)[nH]c2=O)[O-])[O-])C(C(C1O)OC(C(=O)NC(C(=O)NC(C(=O)[O-])CCC(=O)NC(C(=O)[O-])CCCC(C(=O)[O-])[N+])C)C)NC(=O)C		C04877,C20886	CHEMBL1779332	1	0.535714	0.767857
UDP-N-acetylmuramoyl-L-alanine	1467878766	DB01673,EXPT03184	C01212		UDP-N-acetylmuramoyl-L-alanyl-gamma-D-glutamyl-meso-2,6-diaminopimelate	1467906255	OCC1OC(OP(=O)(OP(=O)(OCC2OC(C(C2O)O)n2ccc(=O)[nH]c2=O)[O-])[O-])C(C(C1O)OC(C(=O)NC(C(=O)NC(C(=O)[O-])CCC(=O)NC(C(=O)[O-])CCCC(C(=O)[O-])[N+])C)C)NC(=O)C		C04877,C20886	CHEMBL1779332	1	0.535714	0.767857
UDP-N-acetylmuramoyl-L-alanyl-D-gamma-glutamyl-meso-2,6-diaminopimeloyl-D-alanine	1467905701		C04804		UDP-N-acetylmuramoyl-L-alanyl-gamma-D-glutamyl-meso-2,6-diaminopimelate	1467906255	OCC1OC(OP(=O)(OP(=O)(OCC2OC(C(C2O)O)n2ccc(=O)[nH]c2=O)[O-])[O-])C(C(C1O)OC(C(=O)NC(C(=O)NC(C(=O)[O-])CCC(=O)NC(C(=O)[O-])CCCC(C(=O)[O-])[N+])C)C)NC(=O)C		C04877,C20886	CHEMBL1779332	1	0.535714	0.767857
UDP-N-acetylmuramoyl-L-alanyl-D-glutamate	1467873594	DB02314,EXPT03165	C00692		UDP-N-acetylmuramoyl-L-alanyl-gamma-D-glutamyl-meso-2,6-diaminopimelate	1467906255	OCC1OC(OP(=O)(OP(=O)(OCC2OC(C(C2O)O)n2ccc(=O)[nH]c2=O)[O-])[O-])C(C(C1O)OC(C(=O)NC(C(=O)NC(C(=O)[O-])CCC(=O)NC(C(=O)[O-])CCCC(C(=O)[O-])[N+])C)C)NC(=O)C		C04877,C20886	CHEMBL1779332	1	0.535714	0.767857
UDP-N-acetylmuramoyl-L-alanyl-D-glutamyl-6-carboxy-L-lysyl-D-alanyl-D-alanine	1467906287		C04882		UDP-N-acetylmuramoyl-L-alanyl-gamma-D-glutamyl-meso-2,6-diaminopimelate	1467906255	OCC1OC(OP(=O)(OP(=O)(OCC2OC(C(C2O)O)n2ccc(=O)[nH]c2=O)[O-])[O-])C(C(C1O)OC(C(=O)NC(C(=O)NC(C(=O)[O-])CCC(=O)NC(C(=O)[O-])CCCC(C(=O)[O-])[N+])C)C)NC(=O)C		C04877,C20886	CHEMBL1779332	1	0.535714	0.767857
UDP-N-acetylmuramoyl-L-alanyl-D-glutamyl-LL-2,6-diaminopimeloyl-D-alanyl-D-lactate	1468048593		C20880		UDP-N-acetylmuramoyl-L-alanyl-gamma-D-glutamyl-meso-2,6-diaminopimelate	1467906255	OCC1OC(OP(=O)(OP(=O)(OCC2OC(C(C2O)O)n2ccc(=O)[nH]c2=O)[O-])[O-])C(C(C1O)OC(C(=O)NC(C(=O)NC(C(=O)[O-])CCC(=O)NC(C(=O)[O-])CCCC(C(=O)[O-])[N+])C)C)NC(=O)C		C04877,C20886	CHEMBL1779332	1	0.535714	0.767857
UDP-N-acetylmuramoyl-L-alanyl-gamma-D-glutamyl-L-lysine	1467912980		C05892	CHEMBL1777829	UDP-N-acetylmuramoyl-L-alanyl-gamma-D-glutamyl-meso-2,6-diaminopimelate	1467906255	OCC1OC(OP(=O)(OP(=O)(OCC2OC(C(C2O)O)n2ccc(=O)[nH]c2=O)[O-])[O-])C(C(C1O)OC(C(=O)NC(C(=O)NC(C(=O)[O-])CCC(=O)NC(C(=O)[O-])CCCC(C(=O)[O-])[N+])C)C)NC(=O)C		C04877,C20886	CHEMBL1779332	1	0.535714	0.767857
Hecogenin	1467940356		C08902	ChEMBLE_NTD,CHEMBL1401685,CHEMBL1605286,CHEMBL3185544	UID:482466013	482466013	OCC1OC(OC2CCC3(C(C2)CCC2C3CC(=O)C3(C2CC2C3C(C)C3(O2)CCC(CO3)C)C)C)C(C(C1O)O)NC(=O)C			CHEMBL2071415	1	0.535714	0.767857
Teicoplanin A2-2	1467976562		C12046	CHEMBL2105779,CHEMBL2368011	UID:667095369	667095369	OCC1OC(Oc2c3cc4cc2Oc2ccc(cc2Cl)C(O)C2C(=O)NC(C(=O)NC4C(=O)NC4C(=O)NC(C(c5ccc(O3)c(Cl)c5)OC3OC(CO)C(C(C3NC(=O)C)O)O)C(=O)NC(c3c(c5cc4ccc5O)c(cc(c3)O)OC3OC(CO)C(C(C3O)O)O)C(=O)O)c3cc(O)cc(c3)Oc3cc(C(C(=O)N2)N)ccc3O)C(C(C1O)O)NC(=O)CCCCCCC(C)C			CHEMBL3215342	1	0.535714	0.767857
2-Deoxy-2,3-dehydro-N-acetylneuraminic acid	1467904028		C04580	CHEMBL1161589,CHEMBL116550,CHEMBL291345,CHEMBL334952,CHEMBL416139,CHEMBL77627,CHEMBL96712	Zanamivir	1467931432	OCC(C(C1OC(=CC(C1NC(=O)C)NC(=N)N)C(=O)O)O)O		C08095,D00902	CHEMBL127235,CHEMBL1357654,CHEMBL157939,CHEMBL1673195,CHEMBL174747,CHEMBL193303,CHEMBL222813,CHEMBL300502,CHEMBL3348924	1	0.535714	0.767857
Laninamivir	5957191	DB12791	C21557,D09410	CHEMBL1673194,CHEMBL466246	Zanamivir	1467931432	OCC(C(C1OC(=CC(C1NC(=O)C)NC(=N)N)C(=O)O)O)O		C08095,D00902	CHEMBL127235,CHEMBL1357654,CHEMBL157939,CHEMBL1673195,CHEMBL174747,CHEMBL193303,CHEMBL222813,CHEMBL300502,CHEMBL3348924	1	0.535714	0.767857
cetrorelix	1468205025	APRD00686,BIOD00115,BTD00115,DB00050	D07665	CHEMBL1200490,CHEMBL437919,CHEMBL438829	(2R)-1-[(2S)-2-[[(2S)-2-[[(2S)-2-[[(2S)-2-[[(2S)-2-[[(2S)-2-[[(2S)-2-[[(2S)-2-acetamido-3-(2-naphthyl)propanoyl]amino]-3-(4-chlorophenyl)propanoyl]amino]-3-(3-pyridyl)propanoyl]amino]-3-hydroxy-propanoyl]-methyl-amino]-3-(4-hydroxyphenyl)propanoyl]amino]-5-ureido-pentanoyl]amino]-4-methyl-pentanoyl]amino]-5-guanidino-pentanoyl]-N-[(1S)-2-amino-1-methyl-2-oxo-ethyl]pyrrolidine-2-carboxamide	279879208	OCC(C(=O)N(C(C(=O)NC(C(=O)NC(C(=O)NC(C(=O)N1CCCC1C(=O)NC(C(=O)N)C)CCCN=C(N)N)CC(C)C)CCCNC(=O)N)Cc1ccc(cc1)O)C)NC(=O)C(Cc1cccnc1)NC(=O)C(Cc1ccc(cc1)Cl)NC(=O)C(Cc1ccc2c(c1)cccc2)NC(=O)C			CHEMBL409219	1	0.533333	0.766667
Degarelix	1468619625		D08901	ChEMBLE_NTD,CHEMBL415606,CHEMBL444381	(2S)-2-[[6-[[5-[(3aR,6S,6aS)-3-[bis(4-methoxyphenyl)-phenylmethyl]-2-oxo-3a,4,6,6a-tetrahydro-1H-thieno[3,4-d]imidazol-6-yl]-1-oxopentyl]amino]-1-oxohexyl]amino]-3-phenylpropanoic acid [(2R,3R,4R,5R)-4-[bis(2-methoxyethoxy)methoxy]-5-[6-[[bis(4-methoxyphenyl)-phenylmethyl]amino]-9-purinyl]-2-(hydroxymethyl)-3-oxolanyl] ester	131960480	ONC(=O)Nc1ccc(cc1)CC(C(=O)NC(C(=O)NC(C(=O)N1CCCC1C(=O)NC(C(=O)N)C)CCCCNC(C)C)CC(C)C)NC(=O)C(NC(=O)C(NC(=O)C(NC(=O)C(NC(=O)C(Cc1ccc2c(c1)cccc2)NC(=O)C)Cc1ccc(cc1)Cl)Cc1cccnc1)CO)Cc1ccc(cc1)NC(=O)C1CC(=O)NC(=O)N1			CHEMBL427976	1	0.533333	0.766667
Toluene-4-sulfonate	1467920252		C06677	CHEMBL541253	(2-acetamido-4-chloro-phenyl) 4-methylbenzenesulfonate	22255331	CC(=O)Nc1cc(Cl)ccc1OS(=O)(=O)c1ccc(cc1)C			CHEMBL1442831	1	0.52381	0.761905
3-Oxo-3-phenylpropanoate	1467923905		C07114	CHEMBL3251041,CHEMBL3546292	(3S)-3-acetamido-3-phenylpropanoic acid	8343446	OC(=O)CC(c1ccccc1)NC(=O)C			CHEMBL1877034	1	0.52381	0.761905
L-beta-Phenylalanine	1468045794		C20487,C20488		(3S)-3-acetamido-3-phenylpropanoic acid	8343446	OC(=O)CC(c1ccccc1)NC(=O)C			CHEMBL1877034	1	0.52381	0.761905
trans-Cinnamate	1467870801		C00423,C10438	CHEMBL27246	(3S)-3-acetamido-3-phenylpropanoic acid	8343446	OC(=O)CC(c1ccccc1)NC(=O)C			CHEMBL1877034	1	0.52381	0.761905
Sulfathiazole	1467967722		C11169,D01047	ChEMBLE_NTD,CHEMBL437	3-acetamido-3-phenyl-N-[4-(2-thiazolylsulfamoyl)phenyl]propanamide	133423648	O=C(CC(c1ccccc1)NC(=O)C)Nc1ccc(cc1)S(=O)(=O)Nc1nccs1			CHEMBL1736050	1	0.52381	0.761905
3-aminobenzoate	1468090473	DB02054,EXPT01542		CHEMBL307782	3-acetamidobenzoic acid	487511	CC(=O)Nc1cccc(c1)C(=O)O			CHEMBL116095	1	0.52381	0.761905
Acetanilide	1467927844		C07565	ChEMBLE_NTD,CHEMBL269644	3-acetamidobenzoic acid	487511	CC(=O)Nc1cccc(c1)C(=O)O			CHEMBL116095	1	0.52381	0.761905
Aminohydroquinone	1467992934		C14604		N-(2,5-dihydroxyphenyl)acetamide	60670121	CC(=O)Nc1cc(O)ccc1O			CHEMBL3357298	1	0.52381	0.761905
N-(4-oxocyclohex-2-en-1-yl)acetamide	6300733			ChEMBLE_NTD	N-(5-oxo-7-oxabicyclo[4.1.0]heptan-2-yl)acetamide	6288346	CC(=O)NC1CCC(=O)C2C1O2			ChEMBLE_NTD	1	0.52381	0.761905
N-(5-hydroxy-7-oxabicyclo[4.1.0]heptan-2-yl)acetamide	6288291			ChEMBLE_NTD	N-(5-oxo-7-oxabicyclo[4.1.0]heptan-2-yl)acetamide	6288346	CC(=O)NC1CCC(=O)C2C1O2			ChEMBLE_NTD	1	0.52381	0.761905
N-[3-[(carbamothioylhydrazono)methyl]phenyl]acetamide	32416741			ChEMBLE_NTD	N-[3-[1-(carbamothioylhydrazinylidene)ethyl]phenyl]acetamide	42304070	CC(=O)Nc1cccc(c1)C(=NNC(=S)N)C			CHEMBL3190695	1	0.52381	0.761905
3-Hydroxy-2-naphthoate	1468008219		C16212	CHEMBL229301	N-[3-[2-(3-hydroxynaphthalene-2-carbonyl)hydrazino]-3-oxo-1-phenyl-propyl]acetamide	203659120	O=C(CC(c1ccccc1)NC(=O)C)NNC(=O)c1cc2ccccc2cc1O			CHEMBL1494506	1	0.52381	0.761905
peramivir	1468099371	DB03655,DB06614,EXPT00645		CHEMBL139367,CHEMBL455019	(1R,3S,4R)-3-[(1S)-1-acetamido-2-ethyl-butyl]-4-guanidino-cyclopentanecarboxylic acid	5851531	CCC(C(C1CC(CC1N=C(N)N)C(=O)O)NC(=O)C)CC			CHEMBL136111,CHEMBL474696	1	0.516667	0.758333
4-acetamidobenzoate	1468163131	DB04500,EXPT03145		CHEMBL112687	1-[(4-acetamidophenyl)-oxomethyl]-4-piperidinecarboxylic acid methyl ester	8753707	COC(=O)C1CCN(CC1)C(=O)c1ccc(cc1)NC(=O)C			CHEMBL1323050	1	0.511905	0.755952
NAC	1467970821		C11486	CHEMBL24993	4-acetamido-N-(2,6-dimethylphenyl)-3-methylbenzamide	123960160	CC(=O)Nc1ccc(cc1C)C(=O)Nc1c(C)cccc1C			CHEMBL45516	1	0.511905	0.755952
4-acetamidobenzoate	1468163131	DB04500,EXPT03145		CHEMBL112687	4-acetamido-N-ethyl-N-(o-tolyl)benzamide	7556779	CCN(c1ccccc1C)C(=O)c1ccc(cc1)NC(=O)C			CHEMBL1327430	1	0.511905	0.755952
2-Naphthoic acid	1467987578		C14101	CHEMBL114648	N-(5-acetamido-2-methoxyphenyl)-2-naphthalenecarboxamide	23701716	COc1ccc(cc1NC(=O)c1ccc2c(c1)cccc2)NC(=O)C			CHEMBL1387068	1	0.511905	0.755952
2-Naphthoyl-CoA	1467987773		C14120		N-(5-acetamido-2-methoxyphenyl)-2-naphthalenecarboxamide	23701716	COc1ccc(cc1NC(=O)c1ccc2c(c1)cccc2)NC(=O)C			CHEMBL1387068	1	0.511905	0.755952
diphenylacetic acid	1468160725	DB03588,EXPT01167		CHEMBL1232181	N-[2-(4-acetamidophenyl)-1-phenylethyl]-2,2-diphenylacetamide	96809307	CC(=O)Nc1ccc(cc1)CC(c1ccccc1)NC(=O)C(c1ccccc1)c1ccccc1			CHEMBL289558	1	0.511905	0.755952
4-acetamidobenzoate	1468163131	DB04500,EXPT03145		CHEMBL112687	N-[4-(3,4-dihydro-2H-quinoline-1-carbonyl)phenyl]acetamide	7556834	CC(=O)Nc1ccc(cc1)C(=O)N1CCCc2c1cccc2			CHEMBL331956	1	0.511905	0.755952
4-acetamidobenzoate	1468163131	DB04500,EXPT03145		CHEMBL112687	N-[4-(6-methyl-2,3-dihydropyrido[2,3-b][1,4]oxazine-1-carbonyl)phenyl]acetamide	548753274	CC(=O)Nc1ccc(cc1)C(=O)N1CCOc2c1ccc(n2)C			CHEMBL3464334	1	0.511905	0.755952
6-amino-2-(fluoromethyl)-3-(o-tolyl)quinazolin-4-one	21453		D01638	CHEMBL2105918	N-[2-(fluoromethyl)-3-(o-tolyl)-4-oxo-quinazolin-6-yl]acetamide	29414869	FCc1nc2ccc(cc2c(=O)n1c1ccccc1C)NC(=O)C			CHEMBL3246266	1	0.504762	0.752381
2,6-Dichlorobenzamide	1467965285		C10934	CHEMBL3184754	(2R)-3-acetamido-2-[(2,6-dichlorobenzoyl)amino]propanoic acid	285792079	O=C(c1c(Cl)cccc1Cl)NC(C(=O)O)CNC(=O)C			CHEMBL557449	1	0.5	0.75
Benzamide	1467951492		C09815	CHEMBL267373	(2R)-3-acetamido-2-benzamidopropanoic acid	285801529	O=C(c1ccccc1)NC(C(=O)O)CNC(=O)C			CHEMBL557519	1	0.5	0.75
Benzoate	1467867945	DB03793,EXPT00675	C00180,C00539,D00038	ChEMBLE_NTD,CHEMBL541	(2R)-3-acetamido-2-benzamidopropanoic acid	285801529	O=C(c1ccccc1)NC(C(=O)O)CNC(=O)C			CHEMBL557519	1	0.5	0.75
Benzoyl-CoA	1467871797		C00512		(2R)-3-acetamido-2-benzamidopropanoic acid	285801529	O=C(c1ccccc1)NC(C(=O)O)CNC(=O)C			CHEMBL557519	1	0.5	0.75
N-Acetyl-L-histidine	1467892899		C02997	CHEMBL1387086,CHEMBL3251664	(2S,3R)-2-[[(2S)-1-[(2S)-2-acetamido-3-(1H-imidazol-5-yl)propanoyl]pyrrolidine-2-carbonyl]amino]-3-methyl-pentanoic acid	280237447	CCC(C(C(=O)O)NC(=O)C1CCCN1C(=O)C(Cc1[nH]cnc1)NC(=O)C)C			CHEMBL426885	1	0.5	0.75
D-Ribose 5-phosphate	1467867103		C00117,C03736	CHEMBL1230787,CHEMBL1235722,CHEMBL605020,CHEMBL608476	[(2R,3S,4R,5R)-5-[4-(acetamidomethyl)-1-triazolyl]-3,4-dihydroxy-2-oxolanyl]methyl dihydrogen phosphate	340732461	CC(=O)NCc1nnn(c1)C1OC(C(C1O)O)COP(=O)(O)O			CHEMBL1683328	1	0.5	0.75
Pro-Phe	1468292109			CHEMBL52922	2-[[1-[2-acetamido-3-(1H-imidazol-5-yl)propanoyl]pyrrolidine-2-carbonyl]amino]-3-phenyl-propanoic acid	147431018	CC(=O)NC(C(=O)N1CCCC1C(=O)NC(C(=O)O)Cc1ccccc1)Cc1cnc[nH]1			CHEMBL375366	1	0.5	0.75
Dehydroalanine	1467887158	DB02688,EXPT01186	C02218		3-acetamido-2-aminopropanoic acid	120870169	CC(=O)NCC(C(=O)O)N			CHEMBL153269	1	0.5	0.75
L-2,3-Diaminopropanoate	1467895798	DB03320,EXPT01238	C03401,C06393	CHEMBL103247,CHEMBL420464,CHEMBL596011	3-acetamido-2-aminopropanoic acid	120870169	CC(=O)NCC(C(=O)O)N			CHEMBL153269	1	0.5	0.75
Aromatic aldehyde	1467868131		C00193,C00261,D02314	CHEMBL15972	3-acetamido-N-benzyl-2-methyl-propanamide	279389500	CC(C(=O)NCc1ccccc1)CNC(=O)C			CHEMBL97829	1	0.5	0.75
Benzylamine	1468002529	DB02464,EXPT00400	C15562	CHEMBL522	3-acetamido-N-benzyl-2-methyl-propanamide	279389500	CC(C(=O)NCc1ccccc1)CNC(=O)C			CHEMBL97829	1	0.5	0.75
N-Acetyl-L-histidine	1467892899		C02997	CHEMBL1387086,CHEMBL3251664	5-[[(2S)-2-acetamido-3-(1H-imidazol-5-yl)-1-oxopropyl]amino]-4-oxopentanoic acid methyl ester	278001808	COC(=O)CCC(=O)CNC(=O)C(Cc1[nH]cnc1)NC(=O)C			CHEMBL483277	1	0.5	0.75
N-Acetyl-L-histidine	1467892899		C02997	CHEMBL1387086,CHEMBL3251664	ethyl 2-acetamido-3-(1H-imidazol-5-yl)propanoate	6283005	CC(=O)NC(C(=O)OCC)Cc1cnc[nH]1			ChEMBLE_NTD	1	0.5	0.75
ethyl 2-amino-6-benzyl-5,7-dihydro-4H-thieno[2,3-c]pyridine-3-carboxylate	57195	DB13001	D08602	CHEMBL592943	ethyl 2-acetamido-6-benzyl-4,5,6,7-tetrahydrothieno[2,3-c]pyridin-6-ium-3-carboxylate	23495193	CCOC(=O)c1c(NC(=O)C)sc2c1CC[NH+](C2)Cc1ccccc1			CHEMBL1619850	1	0.5	0.75
Benzoate	1467867945	DB03793,EXPT00675	C00180,C00539,D00038	ChEMBLE_NTD,CHEMBL541	N-(1-benzoylazepan-4-yl)acetamide	382375533	CC(=O)NC1CCCN(CC1)C(=O)c1ccccc1			CHEMBL1957636	1	0.5	0.75
Cytosine	1467870314		C00380	CHEMBL15913	N-(2-oxo-1H-pyrimidin-6-yl)acetamide	2130828	CC(=O)Nc1ccnc(=O)[nH]1			CHEMBL3273673	1	0.5	0.75
N-(2,4-dioxo-1H-pyrimidin-6-yl)acetamide	6309339			ChEMBLE_NTD	N-(2-oxo-1H-pyrimidin-6-yl)acetamide	2130828	CC(=O)Nc1ccnc(=O)[nH]1			CHEMBL3273673	1	0.5	0.75
2-Methylpropanoyl-CoA	1467872984		C00630		N-(3-methyl-2-oxobutyl)acetamide	6278013	CC(=O)NCC(=O)C(C)C			ChEMBLE_NTD	1	0.5	0.75
N-acetylglycine	1468089412	DB02713,EXPT00379		CHEMBL289004	N-(3-methyl-2-oxobutyl)acetamide	6278013	CC(=O)NCC(=O)C(C)C			ChEMBLE_NTD	1	0.5	0.75
S-methyl 2-methylpropanethioate	6293262			ChEMBLE_NTD	N-(3-methyl-2-oxobutyl)acetamide	6278013	CC(=O)NCC(=O)C(C)C			ChEMBLE_NTD	1	0.5	0.75
Linezolid	1467931777	APRD01073,DB00601,DB08769	C08146,D00947	ChEMBLE_NTD,CHEMBL126,CHEMBL191283,CHEMBL7429	N-[[(5S)-3-(3-deuterio-4-morpholino-phenyl)-2-oxo-oxazolidin-5-yl]methyl]acetamide	213541796	CC(=O)NCC1CN(C(=O)O1)c1ccc(cc1)N1CCOCC1			CHEMBL283540	1	0.5	0.75
N-[[(5S)-3-[3-fluoro-4-[4-(2-hydroxyacetyl)piperazin-1-yl]phenyl]-2-oxo-oxazolidin-5-yl]methyl]acetamide	724446		D04017	CHEMBL47955	N-[[(5S)-3-[3-fluoro-4-(1-piperazinyl)phenyl]-2-oxo-5-oxazolidinyl]methyl]acetamide	102374098	CC(=O)NCC1OC(=O)N(C1)c1ccc(c(c1)F)N1CCNCC1			CHEMBL1651124	1	0.5	0.75
Indole-3-acetaldehyde	1467873072		C00637		N-[[1-[2-(1H-indol-3-yl)ethyl]-4-piperidyl]methyl]acetamide	279851503	CC(=O)NCC1CCN(CC1)CCc1c[nH]c2c1cccc2			CHEMBL170013	1	0.5	0.75
N-[[(5S)-3-[3-fluoro-4-[4-[(2H-triazol-4-ylmethylamino)methyl]phenyl]phenyl]-2-oxo-5-oxazolidinyl]methyl]acetamide	109939988		D09369	ChEMBLE_NTD,CHEMBL3637850,CHEMBL455461	N-[[3-[4-[4-(aminomethyl)phenyl]-3-fluorophenyl]-2-oxo-5-oxazolidinyl]methyl]acetamide	186534819	NCc1ccc(cc1)c1ccc(cc1F)N1CC(OC1=O)CNC(=O)C			CHEMBL1275617	1	0.5	0.75
Lamivudine	1467923462		C07065,D00353	ChEMBLE_NTD,CHEMBL141,CHEMBL18314,CHEMBL441594,CHEMBL89149	N-[1-[(2S,5R)-2-(hydroxymethyl)-1,3-oxathiolan-5-yl]-2-oxo-4-pyrimidinyl]acetamide	5549304	CC(=O)Nc1ccn(c(=O)n1)C1CSC(O1)CO			CHEMBL3086948	1	0.5	0.75
N-[2-[1-[(4-isopropylphenyl)methyl]benzimidazol-2-yl]ethyl]acetamide	30550388			ChEMBLE_NTD,CHEMBL581349	N-[2-(1H-benzimidazol-2-yl)ethyl]acetamide	8394924	CC(=O)NCCc1nc2c([nH]1)cccc2			CHEMBL1300196	1	0.5	0.75
Tacrine	1467880636	APRD00690,DB00382	C01453,D08555	ChEMBLE_NTD,CHEMBL95	N-(1,2,3,4-tetrahydroacridin-9-yl)acetamide	141795147	CC(=O)Nc1c2CCCCc2nc2c1cccc2			CHEMBL291110	1	0.488095	0.744048
4-amino-5-chloro-2-ethoxy-N-[[4-[(4-fluorophenyl)methyl]morpholin-2-yl]methyl]benzamide	2324484	DB11675	D08236	CHEMBL60889	4-acetamido-5-chloro-2-ethoxy-N-[[4-[(4-fluorophenyl)methyl]morpholin-2-yl]methyl]benzamide	126564105	CCOc1cc(NC(=O)C)c(cc1C(=O)NCC1OCCN(C1)Cc1ccc(cc1)F)Cl			CHEMBL347944	1	0.47619	0.738095
Tranylcypromine	1467924226		C07155,D08625	ChEMBLE_NTD,CHEMBL1179,CHEMBL1476329,CHEMBL1623519,CHEMBL257990,CHEMBL313833,CHEMBL467794	N-(2-phenylcyclopropyl)acetamide	6730256	CC(=O)NC1CC1c1ccccc1			CHEMBL1463889	1	0.47619	0.738095
N-(3-acetamidophenyl)-2,2,2-trifluoroacetamide	9848433			ChEMBLE_NTD,CHEMBL527454	N-(3-aminophenyl)acetamide	79372	CC(=O)Nc1cccc(c1)N			CHEMBL1606123	1	0.47619	0.738095
N-(3-acetamidophenyl)-2,4-dichlorobenzamide	6315891			ChEMBLE_NTD	N-(3-aminophenyl)acetamide	79372	CC(=O)Nc1cccc(c1)N			CHEMBL1606123	1	0.47619	0.738095
N-(3-acetamidophenyl)-4-bromobenzamide	6317094			ChEMBLE_NTD,CHEMBL1489262	N-(3-aminophenyl)acetamide	79372	CC(=O)Nc1cccc(c1)N			CHEMBL1606123	1	0.47619	0.738095
N-(3-acetamidophenyl)-4,5-dihydro-1H-imidazole-2-carboxamide	6321810			ChEMBLE_NTD	N-(3-aminophenyl)acetamide	79372	CC(=O)Nc1cccc(c1)N			CHEMBL1606123	1	0.47619	0.738095
Phenylenediamine	1467888880		C02454	CHEMBL1595914	N-(3-aminophenyl)acetamide	79372	CC(=O)Nc1cccc(c1)N			CHEMBL1606123	1	0.47619	0.738095
N,N-dimethyl-N'-(3-methylphenyl)ethanimidamide	6175081			ChEMBLE_NTD	N-(m-tolyl)acetamide	112110	CC(=O)Nc1cccc(c1)C			CHEMBL1528164	1	0.47619	0.738095
Zerumbone	1468044085		C20262	CHEMBL245412	N-[(1R,2R,4E,8E)-2,6,6,9-tetramethyl-3-oxo-1-cycloundeca-4,8-dienyl]acetamide	337061765	CC(=O)NC1CCC(=CCC(C=CC(=O)C1C)(C)C)C			CHEMBL1240895	1	0.47619	0.738095
N-[4-hydroxy-3-(methylthio)phenyl]acetamide	2727988			ChEMBLE_NTD	N-[3-(methylthio)phenyl]acetamide	3991687	CSc1cccc(c1)NC(=O)C			CHEMBL1332250	1	0.47619	0.738095
D-Glucose	1467865936	DB02379,EXPT00455,EXPT00685,EXPT01603	C00031,C00124,C00159,C00221,C00267,C00737,C00738,C00936,C00962,C00984,C01487,C01825,C02209,C06464,C06465,C06466,C06467,C15923,C21032,C21050,D00009	CHEMBL103010,CHEMBL1222152,CHEMBL1222250,CHEMBL1233058,CHEMBL1453070,CHEMBL1519430,CHEMBL1614854,CHEMBL1873035,CHEMBL195923,CHEMBL2093058,CHEMBL2115552,CHEMBL300520,CHEMBL3186423,CHEMBL365590,CHEMBL423707,CHEMBL469448,CHEMBL98182	N-[3-[[(2R,3S,4S,5S,6R)-3,4,5-trihydroxy-6-(hydroxymethyl)-2-oxanyl]oxy]phenyl]acetamide	298840738	OCC1OC(Oc2cccc(c2)NC(=O)C)C(C(C1O)O)O			CHEMBL1173060	1	0.47619	0.738095
[5-acetamido-4-hydroxy-6-(1,2,3-trihydroxypropyl)-2-oxanyl]phosphonic acid	13601	DB04561,EXPT00595		CHEMBL1161587	[(2S,4S,5R,6R)-5-acetamido-2,4-dihydroxy-6-[(1R,2R)-1,2,3-trihydroxypropyl]-2-oxanyl]phosphonic acid	108717368	OCC(C(C1OC(O)(CC(C1NC(=O)C)O)P(=O)(O)O)O)O			CHEMBL513445	1	0.469048	0.734524
peramivir	1468099371	DB03655,DB06614,EXPT00645		CHEMBL139367,CHEMBL455019	(1R,2R,3S,4S)-3-(1-acetamido-2-ethyl-butyl)-4-amino-2-hydroxy-cyclopentanecarboxylic acid	95039552	CCC(C(C1C(N)CC(C1O)C(=O)O)NC(=O)C)CC			CHEMBL1928608	1	0.464286	0.732143
4-Chlorochalcone	1467992726		C14585	CHEMBL227560	N-[1-(4-chlorophenyl)-3-oxo-3-phenylpropyl]acetamide	114694051	CC(=O)NC(c1ccc(cc1)Cl)CC(=O)c1ccccc1			CHEMBL1818907	1	0.464286	0.732143
aliskiren	1468100880	DB01258,DB09026	D03208	CHEMBL1639	(2S,4S,5S,7S)-5-acetamido-N-(3-amino-2,2-dimethyl-3-oxo-propyl)-4-hydroxy-2-isopropyl-7-[[4-methoxy-3-(3-methoxypropoxy)phenyl]methyl]-8-methyl-nonanamide	95409171	COCCCOc1cc(ccc1OC)CC(C(C)C)CC(C(CC(C(=O)NCC(C(=O)N)(C)C)C(C)C)O)NC(=O)C			CHEMBL3507703	1	0.461905	0.730952
2-Naphthylamine	1467887258		C02227	CHEMBL278164	N-(2-naphthyl)acetamide	117814	CC(=O)Nc1ccc2c(c1)cccc2			CHEMBL1399876	1	0.461905	0.730952
N-(2-naphthyl)thioacetamide	8734511			ChEMBLE_NTD	N-(2-naphthyl)acetamide	117814	CC(=O)Nc1ccc2c(c1)cccc2			CHEMBL1399876	1	0.461905	0.730952
4-Acetylaminobiphenyl	1468044260		C20285	CHEMBL300429	N-(2-hydroxy-4-phenylphenyl)acetamide	29122871	CC(=O)Nc1ccc(cc1O)c1ccccc1			CHEMBL298508	1	0.454762	0.727381
19-Oxoandrost-4-ene-3,17-dione	1467908353		C05297	CHEMBL1545651	N-[(13-methyl-3,17-dioxo-2,6,7,8,9,11,12,14,15,16-decahydro-1H-cyclopenta[a]phenanthren-10-yl)methyl]acetamide	279813716	CC(=O)NCC12CCC(=O)C=C1CCC1C2CCC2(C1CCC2=O)C			CHEMBL3349931	1	0.453175	0.726587
(Ac)2-L-Lys-D-Ala	1467889174		C02487		(Ac)2-L-Lys-D-Ala-D-Ala	1467895348	CC(=O)NC(C(=O)NC(C(=O)NC(C(=O)O)C)C)CCCCNC(=O)C		C03326	ChEMBLE_NTD,CHEMBL1160427,CHEMBL353896	1	0.452381	0.72619
1-Aminocyclopentanecarboxylate	1467899694		C03969	ChEMBLE_NTD,CHEMBL295830	1-acetamidocyclopentanecarboxylic acid	3361405	CC(=O)NC1(CCCC1)C(=O)O			CHEMBL1416412	1	0.452381	0.72619
N2-Acetyl-L-aminoadipate semialdehyde	1467982452		C12988		1-acetamidocyclopentanecarboxylic acid	3361405	CC(=O)NC1(CCCC1)C(=O)O			CHEMBL1416412	1	0.452381	0.72619
(Ac)2-L-Lys-D-Ala	1467889174		C02487		2-[2-(2,6-diacetamidohexanoylamino)propanoyloxy]propanoic acid	43367447	CC(=O)NC(C(=O)NC(C(=O)OC(C(=O)O)C)C)CCCCNC(=O)C			CHEMBL1160423	1	0.452381	0.72619
4-bromonaphthalen-1-amine	1889288			ChEMBLE_NTD	N-(4-bromo-1-naphthyl)acetamide	3435215	CC(=O)Nc1ccc(c2c1cccc2)Br			CHEMBL1408731	1	0.452381	0.72619
N-[7-(2-bromobenzoyl)-2,3-dihydro-1,4-benzodioxin-6-yl]acetamide	6300799			ChEMBLE_NTD	N-(7-benzoyl-2,3-dihydro-1,4-benzodioxin-6-yl)acetamide	8755969	CC(=O)Nc1cc2OCCOc2cc1C(=O)c1ccccc1			CHEMBL1510721	1	0.452381	0.72619
4-acetamidobenzoate	1468163131	DB04500,EXPT03145		CHEMBL112687	(2-chlorophenyl)methyl 4-acetamidobenzoate	9836121	CC(=O)Nc1ccc(cc1)C(=O)OCc1ccccc1Cl			CHEMBL1537083	1	0.440476	0.720238
4-acetamidobenzoate	1468163131	DB04500,EXPT03145		CHEMBL112687	(2-oxo-2-pyrrolidin-1-yl-ethyl) 4-acetamidobenzoate	35632543	O=C(c1ccc(cc1)NC(=O)C)OCC(=O)N1CCCC1			CHEMBL1557276	1	0.440476	0.720238
4-acetamidobenzoate	1468163131	DB04500,EXPT03145		CHEMBL112687	(4-bromophenyl)methyl 4-acetamidobenzoate	9820615	O=C(c1ccc(cc1)NC(=O)C)OCc1ccc(cc1)Br			CHEMBL1387829	1	0.440476	0.720238
4-acetamidobenzoate	1468163131	DB04500,EXPT03145		CHEMBL112687	(4-chlorophenyl)methyl 4-acetamidobenzoate	9922488	O=C(c1ccc(cc1)NC(=O)C)OCc1ccc(cc1)Cl			CHEMBL1332309	1	0.440476	0.720238
4-acetamidobenzoate	1468163131	DB04500,EXPT03145		CHEMBL112687	[2-[2-(cyclohexen-1-yl)ethylamino]-2-oxo-ethyl] 4-acetamidobenzoate	41170112	O=C(COC(=O)c1ccc(cc1)NC(=O)C)NCCC1=CCCCC1			CHEMBL1735241	1	0.440476	0.720238
4-acetamidobenzoate	1468163131	DB04500,EXPT03145		CHEMBL112687	4-acetamidobenzamide	6676070	CC(=O)Nc1ccc(cc1)C(=O)N			CHEMBL131185	1	0.440476	0.720238
NAC	1467970821		C11486	CHEMBL24993	4-acetamidobenzamide	6676070	CC(=O)Nc1ccc(cc1)C(=O)N			CHEMBL131185	1	0.440476	0.720238
tacedinaline	1468360677	DB12291	D05988	CHEMBL235191	4-acetamidobenzamide	6676070	CC(=O)Nc1ccc(cc1)C(=O)N			CHEMBL131185	1	0.440476	0.720238
4-Aminobenzoate	1467872398		C00568,D02456	CHEMBL542	4-acetamidobenzoate	1468163131	CC(=O)Nc1ccc(cc1)C(=O)O	DB04500,EXPT03145		CHEMBL112687	1	0.440476	0.720238
Acetanilide	1467927844		C07565	ChEMBLE_NTD,CHEMBL269644	4-acetamidobenzoate	1468163131	CC(=O)Nc1ccc(cc1)C(=O)O	DB04500,EXPT03145		CHEMBL112687	1	0.440476	0.720238
NAC	1467970821		C11486	CHEMBL24993	4-acetamidobenzoate	1468163131	CC(=O)Nc1ccc(cc1)C(=O)O	DB04500,EXPT03145		CHEMBL112687	1	0.440476	0.720238
tacedinaline	1468360677	DB12291	D05988	CHEMBL235191	4-acetamidobenzoate	1468163131	CC(=O)Nc1ccc(cc1)C(=O)O	DB04500,EXPT03145		CHEMBL112687	1	0.440476	0.720238
Glutathione	1467866214	DB00143,EXPT01650,NUTR00029	C00051,C02471,D00014	ChEMBLE_NTD,CHEMBL100476,CHEMBL1514919,CHEMBL1543	acetaminophen glutathione conjugate	1468136873	O=C(NC(C(=O)NCC(=O)O)CSc1cc(ccc1O)NC(=O)C)CCC(C(=O)O)N			CHEMBL3544870	1	0.440476	0.720238
Butamben	1467930129		C07875,D00730	ChEMBLE_NTD,CHEMBL127516	butyl 4-acetamidobenzoate	22297188	CCCCOC(=O)c1ccc(cc1)NC(=O)C			CHEMBL1321401	1	0.440476	0.720238
4-acetamidobenzoate	1468163131	DB04500,EXPT03145		CHEMBL112687	isopentyl 4-acetamidobenzoate	7871831	CC(CCOC(=O)c1ccc(cc1)NC(=O)C)C			CHEMBL1493127	1	0.440476	0.720238
1,3-benzodioxol-5-amine	1978973			ChEMBLE_NTD	N-(1,3-benzodioxol-5-yl)acetamide	2124392	CC(=O)Nc1ccc2c(c1)OCO2			CHEMBL1451848	1	0.440476	0.720238
3-(N-acetyl-3,4-dichloroanilino)propanoic acid	6316067			ChEMBLE_NTD	N-(3,4-dichlorophenyl)acetamide	169922	CC(=O)Nc1ccc(c(c1)Cl)Cl			CHEMBL579571	1	0.440476	0.720238
4-Chloroacetanilide	1467991745		C14494	CHEMBL15991	N-(3,4-dichlorophenyl)acetamide	169922	CC(=O)Nc1ccc(c(c1)Cl)Cl			CHEMBL579571	1	0.440476	0.720238
N-(3,4-Dichlorophenyl)-malonamate	1467901351		C04205		N-(3,4-dichlorophenyl)acetamide	169922	CC(=O)Nc1ccc(c(c1)Cl)Cl			CHEMBL579571	1	0.440476	0.720238
N-(4-acetamidophenyl)-3-(2-chlorophenyl)-5-methyl-4-isoxazolecarboxamide	6316563			ChEMBLE_NTD,CHEMBL1716301	N-(4-acetamido-2-methylphenyl)-3-(2-chlorophenyl)-5-methyl-4-isoxazolecarboxamide	26850092	CC(=O)Nc1ccc(c(c1)C)NC(=O)c1c(C)onc1c1ccccc1Cl			CHEMBL1875465	1	0.440476	0.720238
3-(N,4-diacetylanilino)propanoic acid	6312688			ChEMBLE_NTD	N-(4-acetylphenyl)acetamide	1895791	CC(=O)Nc1ccc(cc1)C(=O)C			CHEMBL3408645	1	0.440476	0.720238
N-(4-hydroxy-3,5-dimethylphenyl)acetamide	2035543			ChEMBLE_NTD,CHEMBL278698	N-(4-hydroxy-3-methylphenyl)acetamide	1989693	CC(=O)Nc1ccc(c(c1)C)O			CHEMBL48323	1	0.440476	0.720238
trans-2-Phenylcyclopropanecarboxylic acid	1468001156		C15419		N-[1-(4-acetamidophenyl)ethylideneamino]-2-phenyl-cyclopropanecarboxamide	33722026	CC(=O)Nc1ccc(cc1)C(=NNC(=O)C1CC1c1ccccc1)C			CHEMBL2435314,CHEMBL3210750	1	0.440476	0.720238
4-acetamidobenzoate	1468163131	DB04500,EXPT03145		CHEMBL112687	N-[4-(3-methylpyrazole-1-carbonyl)phenyl]acetamide	9206590	CC(=O)Nc1ccc(cc1)C(=O)n1ccc(n1)C			CHEMBL245164	1	0.440476	0.720238
N-[4-[(carbamothioylhydrazono)methyl]phenyl]acetamide	26197113	DB12829	D08584	CHEMBL375492	N-[4-[1-(carbamothioylhydrazinylidene)ethyl]phenyl]acetamide	29007522	CC(=O)Nc1ccc(cc1)C(=NNC(=S)N)C			CHEMBL3408483	1	0.440476	0.720238
amfenac	1468299118		D07443	CHEMBL25146	2-(2-acetamido-3-benzoylphenyl)acetic acid	129069159	CC(=O)Nc1c(cccc1C(=O)c1ccccc1)CC(=O)O			CHEMBL442179	1	0.433333	0.716667
9-Riburonosyladenine	1467970974		C11501	CHEMBL1569958,CHEMBL595547	(2S,3S,4R,5R)-N-(2-acetamidoethyl)-5-(6-aminopurin-9-yl)-3,4-dihydroxy-2-oxolanecarboxamide	102395471	CC(=O)NCCNC(=O)C1OC(C(C1O)O)n1cnc2c1ncnc2N			CHEMBL609775	1	0.428571	0.714286
(2S,4R)-1-(2-aminoacetyl)-4-benzamido-pyrrolidine-2-carboxylic acid	137085173		D09599	CHEMBL560592	(2S,4R)-1-(2-acetamidoacetyl)-4-benzamido-pyrrolidine-2-carboxylic acid	137663337	CC(=O)NCC(=O)N1CC(CC1C(=O)O)NC(=O)c1ccccc1			CHEMBL540716	1	0.428571	0.714286
Fumarate	1467867176	DB04299,EXPT01511,EXPT02106	C00122,C01384,D02308	CHEMBL503160,CHEMBL539648	(2S)-2-[(2-acetamidoacetyl)amino]butanedioate	16788126	O=C(NC(C(=O)[O-])CC(=O)[O-])CNC(=O)C			CHEMBL433796	1	0.428571	0.714286
N-acetylglycine	1468089412	DB02713,EXPT00379		CHEMBL289004	(2S)-2-[(2-acetamidoacetyl)amino]butanedioate	16788126	O=C(NC(C(=O)[O-])CC(=O)[O-])CNC(=O)C			CHEMBL433796	1	0.428571	0.714286
Oxaloacetate	1467866007		C00036	CHEMBL1794791	(2S)-2-[(2-acetamidoacetyl)amino]butanedioate	16788126	O=C(NC(C(=O)[O-])CC(=O)[O-])CNC(=O)C			CHEMBL433796	1	0.428571	0.714286
2-Oxoglutarate	1467865872		C00026	CHEMBL1686	(2S)-2-[(2-acetamidoacetyl)amino]pentanedioate	17837272	O=C(NC(C(=O)[O-])CCC(=O)[O-])CNC(=O)C			CHEMBL1357656	1	0.428571	0.714286
N-acetylglycine	1468089412	DB02713,EXPT00379		CHEMBL289004	(2S)-2-[(2-acetamidoacetyl)amino]pentanedioate	17837272	O=C(NC(C(=O)[O-])CCC(=O)[O-])CNC(=O)C			CHEMBL1357656	1	0.428571	0.714286
N-Acetyl-L-aspartate	1467877141		C01042	ChEMBLE_NTD,CHEMBL1162493,CHEMBL1162494	(2S)-2-[[(2S)-2-acetamido-3-carboxy-propanoyl]amino]-6-hydrazino-heptanedioic acid	101383035	NNC(C(=O)O)CCCC(C(=O)O)NC(=O)C(NC(=O)C)CC(=O)O			CHEMBL176303	1	0.428571	0.714286
L-2-Amino-6-oxoheptanedioate	1467899041		C03871		(2S)-2-[[(2S)-2-acetamido-3-carboxy-propanoyl]amino]-6-oxo-heptanedioic acid	104194431	OC(=O)CC(C(=O)NC(C(=O)O)CCCC(=O)C(=O)O)NC(=O)C			CHEMBL1204524	1	0.428571	0.714286
N-Acetyl-L-aspartate	1467877141		C01042	ChEMBLE_NTD,CHEMBL1162493,CHEMBL1162494	(2S)-2-[[(2S)-2-acetamido-3-carboxy-propanoyl]amino]-6-oxo-heptanedioic acid	104194431	OC(=O)CC(C(=O)NC(C(=O)O)CCCC(=O)C(=O)O)NC(=O)C			CHEMBL1204524	1	0.428571	0.714286
N-Acetyl-L-aspartate	1467877141		C01042	ChEMBLE_NTD,CHEMBL1162493,CHEMBL1162494	(2S)-2-[[(2S)-2-acetamido-3-carboxy-propanoyl]amino]hexanoic acid	382330585	CCCCC(C(=O)O)NC(=O)C(NC(=O)C)CC(=O)O			CHEMBL1927819	1	0.428571	0.714286
3-Indoleacrylate	1468372493		C21283	CHEMBL445966	(2S)-2-[[(2S)-2-acetamido-4-amino-4-oxo-butanoyl]amino]-3-(1H-indol-3-yl)propanoic acid	1152252236	NC(=O)CC(C(=O)NC(C(=O)O)Cc1c[nH]c2c1cccc2)NC(=O)C			CHEMBL3622607	1	0.428571	0.714286
Indolepyruvate	1467869763		C00331	CHEMBL485012	(2S)-2-[[(2S)-2-acetamido-4-amino-4-oxo-butanoyl]amino]-3-(1H-indol-3-yl)propanoic acid	1152252236	NC(=O)CC(C(=O)NC(C(=O)O)Cc1c[nH]c2c1cccc2)NC(=O)C			CHEMBL3622607	1	0.428571	0.714286
L-Tryptophan	1467866565	DB00150,EXPT02064,NUTR00058	C00078,C00525,C00806,D00020	ChEMBLE_NTD,CHEMBL292303,CHEMBL484901,CHEMBL54976	(2S)-2-[[(2S)-2-acetamido-4-amino-4-oxo-butanoyl]amino]-3-(1H-indol-3-yl)propanoic acid	1152252236	NC(=O)CC(C(=O)NC(C(=O)O)Cc1c[nH]c2c1cccc2)NC(=O)C			CHEMBL3622607	1	0.428571	0.714286
AcAsn	1469350553			CHEMBL172478	(2S)-2-acetamido-N-(4,4,4-trifluoro-3-oxobutan-2-yl)butanediamide	103118674	NC(=O)CC(C(=O)NC(C(=O)C(F)(F)F)C)NC(=O)C			CHEMBL130155	1	0.428571	0.714286
N-Acetylmethionine	1467890786	DB01646,EXPT00506	C02712	CHEMBL174319,CHEMBL45002	(2S)-2-acetamido-N-methyl-4-(methylthio)-N-[[4-(1-pyrazolyl)phenyl]methyl]butanamide	525825451	CSCCC(C(=O)N(Cc1ccc(cc1)n1cccn1)C)NC(=O)C			CHEMBL3479596	1	0.428571	0.714286
3-Oxoadipate	1467875234		C00846		(3S)-3-[[(2S)-2-acetamido-3-carboxy-propanoyl]amino]hexanedioic acid	126181874	OC(=O)CC(NC(=O)C(NC(=O)C)CC(=O)O)CCC(=O)O			CHEMBL93976	1	0.428571	0.714286
N-Acetyl-L-aspartate	1467877141		C01042	ChEMBLE_NTD,CHEMBL1162493,CHEMBL1162494	(3S)-3-[[(2S)-2-acetamido-3-carboxy-propanoyl]amino]hexanedioic acid	126181874	OC(=O)CC(NC(=O)C(NC(=O)C)CC(=O)O)CCC(=O)O			CHEMBL93976	1	0.428571	0.714286
N-Acetyl-L-aspartate	1467877141		C01042	ChEMBLE_NTD,CHEMBL1162493,CHEMBL1162494	(3S)-3-acetamido-4-(carboxymethylamino)-4-oxobutanoic acid	116752732	OC(=O)CNC(=O)C(NC(=O)C)CC(=O)O			CHEMBL1927817	1	0.428571	0.714286
2-acetamido-4-(methylthio)butanamide	6284082			ChEMBLE_NTD	(E)-4-[[(2R)-2-acetamido-4-(methylthio)-1-oxobutyl]amino]-2-butenoic acid methyl ester	278861604	CSCCC(C(=O)NCC=CC(=O)OC)NC(=O)C			CHEMBL10310	1	0.428571	0.714286
N-Acetylmethionine	1467890786	DB01646,EXPT00506	C02712	CHEMBL174319,CHEMBL45002	(E)-4-[[(2R)-2-acetamido-4-(methylthio)-1-oxobutyl]amino]-2-butenoic acid methyl ester	278861604	CSCCC(C(=O)NCC=CC(=O)OC)NC(=O)C			CHEMBL10310	1	0.428571	0.714286
D-Ribose 5-phosphate	1467867103		C00117,C03736	CHEMBL1230787,CHEMBL1235722,CHEMBL605020,CHEMBL608476	[5-[6-(2-acetamidoethylamino)-9-purinyl]-3,4-dihydroxy-2-oxolanyl]methyl dihydrogen phosphate	279774329	CC(=O)NCCNc1ncnc2c1ncn2C1OC(C(C1O)O)COP(=O)(O)O			CHEMBL608353	1	0.428571	0.714286
IMP	1467867285		C00130	ChEMBLE_NTD,CHEMBL1207374	[5-[6-(2-acetamidoethylamino)-9-purinyl]-3,4-dihydroxy-2-oxolanyl]methyl dihydrogen phosphate	279774329	CC(=O)NCCNc1ncnc2c1ncn2C1OC(C(C1O)O)COP(=O)(O)O			CHEMBL608353	1	0.428571	0.714286
Spermidine	1467869584		C00315	CHEMBL19612	2-(2-acetamidoethylthio)-N-[3-(4-aminobutylamino)propyl]acetamide	108473334	NCCCCNCCCNC(=O)CSCCNC(=O)C			CHEMBL3547471	1	0.428571	0.714286
2-Oxosuccinamate	1467888318		C02362		2-[(2-acetamidoacetyl)amino]-4-amino-4-oxo-butanoic acid	208526491	O=C(NC(C(=O)O)CC(=O)N)CNC(=O)C			CHEMBL173292	1	0.428571	0.714286
L-Asparagine	1467867581		C00152,C01905,C16438	ChEMBLE_NTD,CHEMBL1232369,CHEMBL58832	2-[(2-acetamidoacetyl)amino]-4-amino-4-oxo-butanoic acid	208526491	O=C(NC(C(=O)O)CC(=O)N)CNC(=O)C			CHEMBL173292	1	0.428571	0.714286
Maleamate	1467881870		C01596	CHEMBL1999289	2-[(2-acetamidoacetyl)amino]-4-amino-4-oxo-butanoic acid	208526491	O=C(NC(C(=O)O)CC(=O)N)CNC(=O)C			CHEMBL173292	1	0.428571	0.714286
N-acetylglycine	1468089412	DB02713,EXPT00379		CHEMBL289004	2-[(2-acetamidoacetyl)amino]-4-amino-4-oxo-butanoic acid	208526491	O=C(NC(C(=O)O)CC(=O)N)CNC(=O)C			CHEMBL173292	1	0.428571	0.714286
4-Methyl-2-oxopentanoate	1467868629		C00233	CHEMBL445647	2-[(2-acetamidoacetyl)amino]-4-methyl-pentanoic acid	40333814	CC(CC(C(=O)O)NC(=O)CNC(=O)C)C			CHEMBL301700	1	0.428571	0.714286
Glycyl-leucine	1467886667		C02155	CHEMBL53813,CHEMBL56119	2-[(2-acetamidoacetyl)amino]-4-methyl-pentanoic acid	40333814	CC(CC(C(=O)O)NC(=O)CNC(=O)C)C			CHEMBL301700	1	0.428571	0.714286
L-Leucine	1467867191	DB00149,NUTR00033	C00123,C01570,C16439,D00030	CHEMBL1232258,CHEMBL291962,CHEMBL46575	2-[(2-acetamidoacetyl)amino]-4-methyl-pentanoic acid	40333814	CC(CC(C(=O)O)NC(=O)CNC(=O)C)C			CHEMBL301700	1	0.428571	0.714286
N-acetylglycine	1468089412	DB02713,EXPT00379		CHEMBL289004	2-[(2-acetamidoacetyl)amino]-4-methyl-pentanoic acid	40333814	CC(CC(C(=O)O)NC(=O)CNC(=O)C)C			CHEMBL301700	1	0.428571	0.714286
2-acetamido-3-phenyl-2-propenoic acid methyl ester	4470179			ChEMBLE_NTD	2-acetamido-3-(4-fluorophenyl)-2-propenoic acid methyl ester	8269859	COC(=O)C(=Cc1ccc(cc1)F)NC(=O)C			CHEMBL1612223	1	0.428571	0.714286
p-Anisaldehyde	1467963254		C10761	CHEMBL161598	2-acetamido-3-(4-methoxyphenyl)prop-2-enoic acid	4028833	COc1ccc(cc1)C=C(C(=O)O)NC(=O)C			CHEMBL1422800	1	0.428571	0.714286
4-Methyl-2-oxopentanoate	1467868629		C00233	CHEMBL445647	2-acetamido-4-methyl-2-pentenoic acid	6297317	CC(=O)NC(=CC(C)C)C(=O)O			ChEMBLE_NTD	1	0.428571	0.714286
N-Acetyl-L-leucine	1467890765		C02710,D07350	ChEMBLE_NTD,CHEMBL174357,CHEMBL1875805,CHEMBL56021	2-acetamido-4-methyl-2-pentenoic acid	6297317	CC(=O)NC(=CC(C)C)C(=O)O			ChEMBLE_NTD	1	0.428571	0.714286
Nordazepam	1467927028		C07486,D08283	CHEMBL523	2-acetamido-N-(2-benzoyl-4-chlorophenyl)acetamide	3069842	CC(=O)NCC(=O)Nc1ccc(cc1C(=O)c1ccccc1)Cl			CHEMBL92366	1	0.428571	0.714286
Naltrexone	1467924961		C07253,D05113	ChEMBLE_NTD,CHEMBL1437711,CHEMBL1625662,CHEMBL19019,CHEMBL20799,CHEMBL3577577,CHEMBL36504	2-acetamido-N-[2-[[(4R)-3-(cyclopropylmethyl)-4a,9-dihydroxy-1,2,4,5,6,7,7a,13-octahydro-4,12-methanobenzofuro[3,2-e]isoquinoline-7-yl]amino]-2-oxoethyl]acetamide	278885654	O=C(NC1CCC2(C34C1Oc1c4c(CC2N(CC3)CC2CC2)ccc1O)O)CNC(=O)CNC(=O)C			CHEMBL275827	1	0.428571	0.714286
3,4-Dihydroxymandelaldehyde	1467910519		C05577		2-acetamido-N-[3-[[2-(3,4-dihydroxyphenyl)-2-hydroxyethyl]amino]propyl]acetamide	279773838	O=C(CNC(=O)C)NCCCNCC(c1ccc(c(c1)O)O)O			CHEMBL160438	1	0.428571	0.714286
Aromatic aldehyde	1467868131		C00193,C00261,D02314	CHEMBL15972	2-acetamido-N-benzyl-acetamide	95021479	O=C(CNC(=O)C)NCc1ccccc1			CHEMBL153559	1	0.428571	0.714286
Benzylamine	1468002529	DB02464,EXPT00400	C15562	CHEMBL522	2-acetamido-N-benzyl-acetamide	95021479	O=C(CNC(=O)C)NCc1ccccc1			CHEMBL153559	1	0.428571	0.714286
N-acetylglycine	1468089412	DB02713,EXPT00379		CHEMBL289004	2-acetamido-N-benzyl-acetamide	95021479	O=C(CNC(=O)C)NCc1ccccc1			CHEMBL153559	1	0.428571	0.714286
Leinamycin	1468003595		C15677	CHEMBL360089,CHEMBL557218	2-acetamidoacetic acid [(2Z,4E,4'R,7R,8E,12R,16S)-4'-hydroxy-4',9,16-trimethyl-1',3',6,14-tetraoxo-7-spiro[18-thia-15,20-diazabicyclo[15.2.1]eicosa-1(19),2,4,8,17(20)-pentaene-12,5'-dithiolane]yl] ester	279674373	O=C(OC1C=C(C)CCC2(CC(=O)NC(c3nc(C=CC=CC1=O)cs3)C)S(=O)SC(=O)C2(C)O)CNC(=O)C			CHEMBL557011	1	0.428571	0.714286
2-[acetyl-(2,2,2-trifluoro-1-oxoethyl)amino]acetic acid methyl ester	6291842			ChEMBLE_NTD	2-acetamidoacetic acid methyl ester	6105931	COC(=O)CNC(=O)C			CHEMBL3278878	1	0.428571	0.714286
N-(2-oxoethyl)acetamide	6295127			ChEMBLE_NTD	2-acetamidoacetic acid methyl ester	6105931	COC(=O)CNC(=O)C			CHEMBL3278878	1	0.428571	0.714286
N-acetylglycine	1468089412	DB02713,EXPT00379		CHEMBL289004	2-acetamidoacetic acid methyl ester	6105931	COC(=O)CNC(=O)C			CHEMBL3278878	1	0.428571	0.714286
2-Aminobut-2-enoate	1468017547	DB03720,EXPT01127	C17234		2-acetamidobut-2-enoic acid	2548224	CC=C(C(=O)O)NC(=O)C			CHEMBL274902	1	0.428571	0.714286
2-Oxobutanoate	1467866997	DB04553,EXPT00126	C00109	CHEMBL171246	2-acetamidobut-2-enoic acid	2548224	CC=C(C(=O)O)NC(=O)C			CHEMBL274902	1	0.428571	0.714286
ethyl 2-acetamidobut-2-enoate	6302574			ChEMBLE_NTD	2-acetamidobut-2-enoic acid	2548224	CC=C(C(=O)O)NC(=O)C			CHEMBL274902	1	0.428571	0.714286
N-acetyl-L-threonine	1468092009				2-acetamidobut-2-enoic acid	2548224	CC=C(C(=O)O)NC(=O)C			CHEMBL274902	1	0.428571	0.714286
N-Acetylmethionine	1467890786	DB01646,EXPT00506	C02712	CHEMBL174319,CHEMBL45002	2-acetamidobut-2-enoic acid	2548224	CC=C(C(=O)O)NC(=O)C			CHEMBL274902	1	0.428571	0.714286
(2S)-2-[[(3S)-3-acetamido-3-carboxy-propanoyl]amino]pentanedioic acid	3170601		D07374	ChEMBLE_NTD,CHEMBL1518212,CHEMBL2105616	AcAsn	1469350553	NC(=O)CC(C(=O)[O-])NC(=O)C			CHEMBL172478	1	0.428571	0.714286
L-Asparagine	1467867581		C00152,C01905,C16438	ChEMBLE_NTD,CHEMBL1232369,CHEMBL58832	AcAsn	1469350553	NC(=O)CC(C(=O)[O-])NC(=O)C			CHEMBL172478	1	0.428571	0.714286
Maleamate	1467881870		C01596	CHEMBL1999289	AcAsn	1469350553	NC(=O)CC(C(=O)[O-])NC(=O)C			CHEMBL172478	1	0.428571	0.714286
N-Acetyl-L-aspartate	1467877141		C01042	ChEMBLE_NTD,CHEMBL1162493,CHEMBL1162494	AcAsn	1469350553	NC(=O)CC(C(=O)[O-])NC(=O)C			CHEMBL172478	1	0.428571	0.714286
Butamben	1467930129		C07875,D00730	ChEMBLE_NTD,CHEMBL127516	butyl 4-(2-acetamidoethylcarbamoylamino)benzoate	279438908	CCCCOC(=O)c1ccc(cc1)NC(=O)NCCNC(=O)C			CHEMBL100704	1	0.428571	0.714286
Deacetylepithienamycin F	1468048103		C20816		Epithienamycin F	1468018631	CC(=O)NCCSC1=C(C(=O)O)N2C(C1)C(C2=O)C(OS(=O)(=O)O)C		C17399	CHEMBL1205319	1	0.428571	0.714286
Epithienamycin A	1468018357		C17372,C17377,C17397	CHEMBL2114194,CHEMBL2115201,CHEMBL346183,CHEMBL84799	Epithienamycin F	1468018631	CC(=O)NCCSC1=C(C(=O)O)N2C(C1)C(C2=O)C(OS(=O)(=O)O)C		C17399	CHEMBL1205319	1	0.428571	0.714286
Epithienamycin E	1467973472		C11755	CHEMBL1206965,CHEMBL1207721	Epithienamycin F	1468018631	CC(=O)NCCSC1=C(C(=O)O)N2C(C1)C(C2=O)C(OS(=O)(=O)O)C		C17399	CHEMBL1205319	1	0.428571	0.714286
Succinate	1467866095		C00042	CHEMBL576	Epithienamycin F	1468018631	CC(=O)NCCSC1=C(C(=O)O)N2C(C1)C(C2=O)C(OS(=O)(=O)O)C		C17399	CHEMBL1205319	1	0.428571	0.714286
Indole-3-carboxaldehyde	1467935344		C08493	CHEMBL147741	ethyl (Z)-2-acetamido-3-(1H-indol-3-yl)prop-2-enoate	20137432	CCOC(=O)C(=Cc1c[nH]c2c1cccc2)NC(=O)C			CHEMBL1306801,CHEMBL1465928	1	0.428571	0.714286
Ethyl cinnamate	1467917082		C06359	CHEMBL318196,CHEMBL3182745	ethyl 2-[(2-acetamidoacetyl)amino]-3-phenyl-propanoate	7421951	CCOC(=O)C(Cc1ccccc1)NC(=O)CNC(=O)C			CHEMBL1339205	1	0.428571	0.714286
ethyl 2-[acetyl(2,2-dicyanovinyl)amino]acetate	6278388			ChEMBLE_NTD	ethyl 2-acetamidoacetate	738901	CCOC(=O)CNC(=O)C			CHEMBL3278870	1	0.428571	0.714286
N-(2-oxoethyl)acetamide	6295127			ChEMBLE_NTD	ethyl 2-acetamidoacetate	738901	CCOC(=O)CNC(=O)C			CHEMBL3278870	1	0.428571	0.714286
N-acetylglycine	1468089412	DB02713,EXPT00379		CHEMBL289004	ethyl 2-acetamidoacetate	738901	CCOC(=O)CNC(=O)C			CHEMBL3278870	1	0.428571	0.714286
N-acetyl-L-isoleucine	1468118720			CHEMBL1221841,CHEMBL173413	N-(1-cyano-2-methylbutyl)acetamide	6301704	CCC(C(NC(=O)C)C#N)C			ChEMBLE_NTD	1	0.428571	0.714286
N-(2-oxoethyl)acetamide	6295127			ChEMBLE_NTD	N-(2-acetamidoethyl)-3-bromo-2-thiophenecarboxamide	300998058	CC(=O)NCCNC(=O)c1sccc1Br			CHEMBL3451772	1	0.428571	0.714286
4-amino-1,2,5-oxadiazole-3-carboxamide	6332959			ChEMBLE_NTD,CHEMBL3589016	N-(2-acetamidoethyl)-4-amino-1,2,5-oxadiazole-3-carboxamide	6294777	CC(=O)NCCNC(=O)c1nonc1N			ChEMBLE_NTD	1	0.428571	0.714286
4-amino-N-(2-aminoethyl)-1,2,5-oxadiazole-3-carboxamide	6283908			ChEMBLE_NTD	N-(2-acetamidoethyl)-4-amino-1,2,5-oxadiazole-3-carboxamide	6294777	CC(=O)NCCNC(=O)c1nonc1N			ChEMBLE_NTD	1	0.428571	0.714286
N-(2-oxoethyl)acetamide	6295127			ChEMBLE_NTD	N-(2-acetamidoethyl)-4-amino-1,2,5-oxadiazole-3-carboxamide	6294777	CC(=O)NCCNC(=O)c1nonc1N			ChEMBLE_NTD	1	0.428571	0.714286
N-(2-oxoethyl)acetamide	6295127			ChEMBLE_NTD	N-(2-indol-1-ylethyl)acetamide	31374490	CC(=O)NCCn1ccc2c1cccc2			CHEMBL1587057	1	0.428571	0.714286
L-homocysteine thiolactone	1468211101			CHEMBL3272518	N-(2-oxo-3-thiolanyl)acetamide	150013	CC(=O)NC1CCSC1=O		D07105	ChEMBLE_NTD,CHEMBL1741824,CHEMBL2104457	1	0.428571	0.714286
N-(2-Phenylethyl)-acetamide	1467920877		C06746	CHEMBL99827	N-(2-phenoxyethyl)acetamide	119919707	CC(=O)NCCOc1ccccc1			CHEMBL1223056	1	0.428571	0.714286
N-[2-(4-chlorophenoxy)ethyl]acetamide	6284234			ChEMBLE_NTD	N-(2-phenoxyethyl)acetamide	119919707	CC(=O)NCCOc1ccccc1			CHEMBL1223056	1	0.428571	0.714286
N-(2-oxoethyl)acetamide	6295127			ChEMBLE_NTD	N-(2-pyrrolo[2,3-b]pyridin-1-ylethyl)acetamide	164170810	CC(=O)NCCn1ccc2c1nccc2			CHEMBL137970	1	0.428571	0.714286
5-FC	1468107584	APRD00299,DB01099	D00323	ChEMBLE_NTD,CHEMBL1463	N-(5-fluoro-2-oxo-1H-pyrimidin-6-yl)acetamide	4594693	CC(=O)Nc1[nH]c(=O)ncc1F			CHEMBL3250963	1	0.428571	0.714286
Hymexazol	1467967057		C11103	CHEMBL244877	N-(5-methylisoxazol-3-yl)acetamide	6301737	CC(=O)Nc1noc(c1)C			ChEMBLE_NTD	1	0.428571	0.714286
1-Naphthylamine	1467995015		C14790	CHEMBL57394	N-[2-(1-naphthylamino)ethyl]acetamide	27934224	CC(=O)NCCNc1cccc2c1cccc2			CHEMBL1214323	1	0.428571	0.714286
N-(2-oxoethyl)acetamide	6295127			ChEMBLE_NTD	N-[2-(2,3-dihydropyrrolo[2,3-b]pyridin-1-yl)ethyl]acetamide	279657501	CC(=O)NCCN1CCc2c1nccc2			CHEMBL141430	1	0.428571	0.714286
N-(2-oxoethyl)acetamide	6295127			ChEMBLE_NTD	N-[2-(3-methoxyanilino)ethyl]acetamide	209053310	COc1cccc(c1)NCCNC(=O)C			CHEMBL398017	1	0.428571	0.714286
4-Chlorophenol	1467886391	DB13154	C02124,D00149	ChEMBLE_NTD,CHEMBL57053	N-[2-(4-chlorophenoxy)ethyl]acetamide	6284234	CC(=O)NCCOc1ccc(cc1)Cl			ChEMBLE_NTD	1	0.428571	0.714286
Acetamide	1467916182		C06244	CHEMBL16081	N-[2-(methylthio)ethyl]acetamide	21811794	CSCCNC(=O)C			CHEMBL1608327	1	0.428571	0.714286
Acetyl phosphate	1467868563		C00227		N-[2-(methylthio)ethyl]acetamide	21811794	CSCCNC(=O)C			CHEMBL1608327	1	0.428571	0.714286
Phenol	1467867498		C00146,C15584,D00033	CHEMBL14060	N-[2-(phenylthio)ethyl]acetamide	122457530	CC(=O)NCCSc1ccccc1			CHEMBL1223125	1	0.428571	0.714286
Phenylethanolamine	1467890994		C02735	CHEMBL19216,CHEMBL19363,CHEMBL19853	N-[2-[(2-hydroxy-2-phenylethyl)amino]ethyl]acetamide	278896248	OC(c1ccccc1)CNCCNC(=O)C			CHEMBL16865	1	0.428571	0.714286
Hydroxyanisole	1468638189	DB09516	D04926	CHEMBL544	N-[2-[(4-methoxyphenyl)thio]ethyl]acetamide	305734945	COc1ccc(cc1)SCCNC(=O)C			CHEMBL1223126	1	0.428571	0.714286
Fluvoxamine	1467927907		C07571,D07984	CHEMBL1314286,CHEMBL1621884,CHEMBL814	N-[2-[[5-methoxy-1-[4-(trifluoromethyl)phenyl]pentylidene]amino]oxyethyl]acetamide	6191826	COCCCCC(=NOCCNC(=O)C)c1ccc(cc1)C(F)(F)F			ChEMBLE_NTD	1	0.428571	0.714286
Histamine	1467870398	APRD01015,DB00667,DB05381,DB05891,DB11320	C00388,D08040	CHEMBL90	N-[2-[2-(1H-imidazol-5-yl)ethylamino]ethyl]acetamide	126142996	CC(=O)NCCNCCc1[nH]cnc1			CHEMBL296087	1	0.428571	0.714286
Imidazole-4-acetaldehyde	1467907204		C05130		N-[2-[2-(1H-imidazol-5-yl)ethylamino]ethyl]acetamide	126142996	CC(=O)NCCNCCc1[nH]cnc1			CHEMBL296087	1	0.428571	0.714286
N-(2-oxoethyl)acetamide	6295127			ChEMBLE_NTD	N-[2-[2-(1H-imidazol-5-yl)ethylamino]ethyl]acetamide	126142996	CC(=O)NCCNCCc1[nH]cnc1			CHEMBL296087	1	0.428571	0.714286
N-(4-acetamidobutyl)acetamide	6255010			ChEMBLE_NTD	N-[4-[3-acetamidopropyl(acetyl)amino]butyl]acetamide	125316558	CC(=O)NCCCCN(C(=O)C)CCCNC(=O)C			CHEMBL441047	1	0.428571	0.714286
N1,N8-Diacetylspermidine	1469317356			CHEMBL2008816	N-[4-[3-acetamidopropyl(acetyl)amino]butyl]acetamide	125316558	CC(=O)NCCCCN(C(=O)C)CCCNC(=O)C			CHEMBL441047	1	0.428571	0.714286
N4-Acetylaminobutanal	1467913450		C05936		N-[4-[3-acetamidopropyl(acetyl)amino]butyl]acetamide	125316558	CC(=O)NCCCCN(C(=O)C)CCCNC(=O)C			CHEMBL441047	1	0.428571	0.714286
(2S)-2-[[(3S)-3-acetamido-3-carboxy-propanoyl]amino]pentanedioic acid	3170601		D07374	ChEMBLE_NTD,CHEMBL1518212,CHEMBL2105616	N-Acetyl-L-aspartate	1467877141	OC(=O)CC(C(=O)O)NC(=O)C		C01042	ChEMBLE_NTD,CHEMBL1162493,CHEMBL1162494	1	0.428571	0.714286
AcAsn	1469350553			CHEMBL172478	N-Acetyl-L-aspartate	1467877141	OC(=O)CC(C(=O)O)NC(=O)C		C01042	ChEMBLE_NTD,CHEMBL1162493,CHEMBL1162494	1	0.428571	0.714286
Fumarate	1467867176	DB04299,EXPT01511,EXPT02106	C00122,C01384,D02308	CHEMBL503160,CHEMBL539648	N-Acetyl-L-aspartate	1467877141	OC(=O)CC(C(=O)O)NC(=O)C		C01042	ChEMBLE_NTD,CHEMBL1162493,CHEMBL1162494	1	0.428571	0.714286
L-Aspartate	1467866192		C00049,C00402,C16433,D00013	ChEMBLE_NTD,CHEMBL274323,CHEMBL29757	N-Acetyl-L-aspartate	1467877141	OC(=O)CC(C(=O)O)NC(=O)C		C01042	ChEMBLE_NTD,CHEMBL1162493,CHEMBL1162494	1	0.428571	0.714286
N-(phosphonacetyl)-L-aspartate	1469292878	DB03459,EXPT02494		CHEMBL37681,CHEMBL504802	N-Acetyl-L-aspartate	1467877141	OC(=O)CC(C(=O)O)NC(=O)C		C01042	ChEMBLE_NTD,CHEMBL1162493,CHEMBL1162494	1	0.428571	0.714286
N-Acetyl-beta-alanine	1467877411		C01073		N-Acetyl-L-aspartate	1467877141	OC(=O)CC(C(=O)O)NC(=O)C		C01042	ChEMBLE_NTD,CHEMBL1162493,CHEMBL1162494	1	0.428571	0.714286
N-Acetylaspartylglutamate	1467978847		C12270	ChEMBLE_NTD,CHEMBL1329032,CHEMBL64966,CHEMBL94282	N-Acetyl-L-aspartate	1467877141	OC(=O)CC(C(=O)O)NC(=O)C		C01042	ChEMBLE_NTD,CHEMBL1162493,CHEMBL1162494	1	0.428571	0.714286
Acetamide	1467916182		C06244	CHEMBL16081	N-acetylethanolamine	1468291393	CC(=O)NCCO			CHEMBL3188272	1	0.428571	0.714286
Acetate	1467865967	DB03166,DB04184,EXPT00423	C00033,D00010	CHEMBL539	N-acetylethanolamine	1468291393	CC(=O)NCCO			CHEMBL3188272	1	0.428571	0.714286
Ethanolamine	1467868075		C00189,D05074	CHEMBL104943	N-acetylethanolamine	1468291393	CC(=O)NCCO			CHEMBL3188272	1	0.428571	0.714286
Glycolaldehyde	1467869079		C00266		N-acetylethanolamine	1468291393	CC(=O)NCCO			CHEMBL3188272	1	0.428571	0.714286
N-(2-oxoethyl)acetamide	6295127			ChEMBLE_NTD	N-acetylethanolamine	1468291393	CC(=O)NCCO			CHEMBL3188272	1	0.428571	0.714286
N-[2-(4-chlorophenoxy)ethyl]acetamide	6284234			ChEMBLE_NTD	N-acetylethanolamine	1468291393	CC(=O)NCCO			CHEMBL3188272	1	0.428571	0.714286
N-Ethylacetamide	1468352901		C21404		N-acetylethanolamine	1468291393	CC(=O)NCCO			CHEMBL3188272	1	0.428571	0.714286
Acetamide	1467916182		C06244	CHEMBL16081	N-acetylpropanamide	6277548	CCC(=O)NC(=O)C			ChEMBLE_NTD	1	0.428571	0.714286
N-acetylethanimidic acid methyl ester	6302563			ChEMBLE_NTD	N-acetylpropanamide	6277548	CCC(=O)NC(=O)C			ChEMBLE_NTD	1	0.428571	0.714286
Osbon AC	1468672135		D03467	CHEMBL444965	N-acetylpropanamide	6277548	CCC(=O)NC(=O)C			ChEMBLE_NTD	1	0.428571	0.714286
Propanoate	1467867736	DB03766,EXPT02641	C00163,D02310	CHEMBL14021	N-acetylpropanamide	6277548	CCC(=O)NC(=O)C			ChEMBLE_NTD	1	0.428571	0.714286
propionamide	1468162686	DB04161,EXPT02807		CHEMBL1235716	N-acetylpropanamide	6277548	CCC(=O)NC(=O)C			ChEMBLE_NTD	1	0.428571	0.714286
S-Methyl propanethioate	1468663488				N-acetylpropanamide	6277548	CCC(=O)NC(=O)C			ChEMBLE_NTD	1	0.428571	0.714286
Ferulate	1467880967		C01494	ChEMBLE_NTD,CHEMBL3185646,CHEMBL32749	S-(2-acetamidoethyl) (E)-3-(4-hydroxy-3-methoxy-phenyl)prop-2-enethioate	113143029	COc1cc(C=CC(=O)SCCNC(=O)C)ccc1O			CHEMBL175785	1	0.428571	0.714286
Feruloyl-CoA	1467870596		C00406		S-(2-acetamidoethyl) (E)-3-(4-hydroxy-3-methoxy-phenyl)prop-2-enethioate	113143029	COc1cc(C=CC(=O)SCCNC(=O)C)ccc1O			CHEMBL175785	1	0.428571	0.714286
2-Aminomalonate semialdehyde	1467974152		C11822		S-(2-acetamidoethyl) 2-aminoethanethioate	565718	CC(=O)NCCSC(=O)CN			CHEMBL1193964	1	0.428571	0.714286
2-methyl-3-ketovaleric acid	1468348592				S-(2-acetamidoethyl) 2-methyl-3-oxo-pentanethioate	280298713	CCC(=O)C(C(=O)SCCNC(=O)C)C			CHEMBL243567	1	0.428571	0.714286
4-Fluorobenzoate	1467888390		C02371	CHEMBL1775001,CHEMBL316860	S-(2-acetamidoethyl) 4-fluorobenzenecarbothioate	21811783	O=C(c1ccc(cc1)F)SCCNC(=O)C			CHEMBL1487303	1	0.428571	0.714286
Benzoyl phosphate	1467915942		C06206		S-(2-acetamidoethyl) benzenecarbothioate	3888905	O=C(c1ccccc1)SCCNC(=O)C			CHEMBL1971917	1	0.428571	0.714286
Benzoylacetyl-CoA	1467923954		C07118		S-(2-acetamidoethyl) benzenecarbothioate	3888905	O=C(c1ccccc1)SCCNC(=O)C			CHEMBL1971917	1	0.428571	0.714286
2-Anthramine	1467990891		C14417	CHEMBL83154	N-(2-anthryl)acetamide	2106123	CC(=O)Nc1ccc2c(c1)cc1c(c2)cccc1			CHEMBL421345	1	0.421429	0.710714
2-Aminoanthraquinone	1467991191		C14444	CHEMBL84685	N-(9,10-dioxo-2-anthryl)acetamide	2094481	CC(=O)Nc1ccc2c(c1)C(=O)c1c(C2=O)cccc1			CHEMBL304069	1	0.421429	0.710714
2-[4-(trifluoromethyl)phenyl]benzoic acid	547112		D06336	CHEMBL2104509	N-(2-acetamidoindan-5-yl)-2-[4-(trifluoromethyl)phenyl]benzamide	106635346	CC(=O)NC1Cc2c(C1)ccc(c2)NC(=O)c1ccccc1c1ccc(cc1)C(F)(F)F			CHEMBL143610	1	0.419388	0.709694
N-Acetyl-D-mannosamine	1468065130		C00645	CHEMBL3182062	5-acetamido-4,6,7,8,9-pentahydroxy-2-oxononanoic acid	4569385	OCC(C(C(C(C(CC(=O)C(=O)O)O)NC(=O)C)O)O)O		D11016	CHEMBL2105945	1	0.416667	0.708333
N-[9-[[4-(dimethylamino)phenyl]methylene]fluoren-2-yl]acetamide	3368236			ChEMBLE_NTD	[4-[(2-acetamido-9-fluorenylidene)methyl]phenyl]-trimethylammonium	5128944	CC(=O)Nc1ccc2c(c1)C(=Cc1ccc(cc1)[N+](C)(C)C)c1c2cccc1			CHEMBL1398636,CHEMBL2009835	1	0.411508	0.705754
2-Acetamidofluorene	1467891292		C02778	CHEMBL311469	7-Hydroxy-2-acetamidofluorene	1467993251	CC(=O)Nc1ccc2c(c1)Cc1c2ccc(c1)O		C14633	CHEMBL1908054	1	0.411508	0.705754
N-(7-methoxy-9H-fluoren-2-yl)acetamide	283012			ChEMBLE_NTD,CHEMBL84673	7-Hydroxy-2-acetamidofluorene	1467993251	CC(=O)Nc1ccc2c(c1)Cc1c2ccc(c1)O		C14633	CHEMBL1908054	1	0.411508	0.705754
2-Acetamidofluorene	1467891292		C02778	CHEMBL311469	N-(7-fluoro-9H-fluoren-2-yl)acetamide	99234	CC(=O)Nc1ccc2c(c1)Cc1c2ccc(c1)F			CHEMBL84443	1	0.411508	0.705754
7-Hydroxy-2-acetamidofluorene	1467993251		C14633	CHEMBL1908054	N-(7-fluoro-9H-fluoren-2-yl)acetamide	99234	CC(=O)Nc1ccc2c(c1)Cc1c2ccc(c1)F			CHEMBL84443	1	0.411508	0.705754
2-Acetamidofluorene	1467891292		C02778	CHEMBL311469	N-(7-iodo-9H-fluoren-2-yl)acetamide	2086432	CC(=O)Nc1ccc2c(c1)Cc1c2ccc(c1)I			CHEMBL84444	1	0.411508	0.705754
[3-amino-17-(1-aminoethyl)-10-methyl-2,3,4,5,6,7,8,9,11,12,14,15,16,17-tetradecahydro-1H-cyclopenta[a]phenanthren-13-yl]methanol	6334959			ChEMBLE_NTD	N-[1-[3-amino-13-(hydroxymethyl)-10-methyl-2,3,4,5,6,7,8,9,11,12,14,15,16,17-tetradecahydro-1H-cyclopenta[a]phenanthren-17-yl]ethyl]acetamide	6331902	OCC12CCC3C(C2CCC1C(NC(=O)C)C)CCC1C3(C)CCC(C1)N			ChEMBLE_NTD	1	0.410317	0.705159
5alpha-Pregnane-3,20-dione	1467897755	DB07557	C03681,C05479	ChEMBLE_NTD,CHEMBL1599817,CHEMBL3085573,CHEMBL3137783,CHEMBL407717,CHEMBL486954	N-[(3S,5S,8R,9S,10S,13S,14S,17S)-17-acetyl-10,13-dimethyl-2,3,4,5,6,7,8,9,11,12,14,15,16,17-tetradecahydro-1H-cyclopenta[a]phenanthren-3-yl]acetamide	383684543	CC(=O)NC1CCC2(C(C1)CCC1C2CCC2(C1CCC2C(=O)C)C)C			CHEMBL2057303	1	0.405896	0.702948
Funtumine	1467963799		C10806	CHEMBL2057302,CHEMBL2322569	N-[(3S,5S,8R,9S,10S,13S,14S,17S)-17-acetyl-10,13-dimethyl-2,3,4,5,6,7,8,9,11,12,14,15,16,17-tetradecahydro-1H-cyclopenta[a]phenanthren-3-yl]acetamide	383684543	CC(=O)NC1CCC2(C(C1)CCC1C2CCC2(C1CCC2C(=O)C)C)C			CHEMBL2057303	1	0.405896	0.702948
2-Acetamidofluorene	1467891292		C02778	CHEMBL311469	5-Hydroxy-2-acetamidofluorene	1467993748	CC(=O)Nc1ccc2c(c1)Cc1c2c(O)ccc1		C14678	CHEMBL1908022	1	0.405736	0.702868
2-Acetamidofluorene	1467891292		C02778	CHEMBL311469	N-(5-fluoro-9H-fluoren-2-yl)acetamide	182134	CC(=O)Nc1ccc2c(c1)Cc1c2c(F)ccc1			CHEMBL85787	1	0.405736	0.702868
5-Hydroxy-2-acetamidofluorene	1467993748		C14678	CHEMBL1908022	N-(5-fluoro-9H-fluoren-2-yl)acetamide	182134	CC(=O)Nc1ccc2c(c1)Cc1c2c(F)ccc1			CHEMBL85787	1	0.405736	0.702868
benzhydrylcarbamic acid	3284166			ChEMBLE_NTD	(2S,3R)-2-acetamido-N-(benzhydrylcarbamoyl)-3-methyl-pentanamide	21824987	CCC(C(C(=O)NC(=O)NC(c1ccccc1)c1ccccc1)NC(=O)C)C			CHEMBL1331316	1	0.404762	0.702381
N-acetyl-L-isoleucine	1468118720			CHEMBL1221841,CHEMBL173413	2-acetamido-3-methylpentanoic acid methyl ester	6299244	CCC(C(C(=O)OC)NC(=O)C)C			ChEMBLE_NTD	1	0.404762	0.702381
2-acetamido-N,N-dicyclohexyl-3,4,5-trihydroxy-6-oxohexanamide	6311162			ChEMBLE_NTD	2-acetamido-3,4,5-trihydroxy-6-oxohexanoic acid	6302078	O=CC(C(C(C(C(=O)O)NC(=O)C)O)O)O			ChEMBLE_NTD	1	0.404762	0.702381
N-(6-formyl-4,5-dihydroxy-2-oxo-3-oxanyl)acetamide	6284386			ChEMBLE_NTD	2-acetamido-3,4,5-trihydroxy-6-oxohexanoic acid	6302078	O=CC(C(C(C(C(=O)O)NC(=O)C)O)O)O			ChEMBLE_NTD	1	0.404762	0.702381
N-Acetyl-D-glucosaminate	1467878001		C01133		2-acetamido-3,4,5-trihydroxy-6-oxohexanoic acid	6302078	O=CC(C(C(C(C(=O)O)NC(=O)C)O)O)O			ChEMBLE_NTD	1	0.404762	0.702381
N-acetylglycine	1468089412	DB02713,EXPT00379		CHEMBL289004	2-acetamido-3,4,5-trihydroxy-6-oxohexanoic acid	6302078	O=CC(C(C(C(C(=O)O)NC(=O)C)O)O)O			ChEMBLE_NTD	1	0.404762	0.702381
2-acetamido-3,4,5-trihydroxy-6-oxohexanoic acid	6302078			ChEMBLE_NTD	2-acetamido-N,N-dicyclohexyl-3,4,5-trihydroxy-6-oxohexanamide	6311162	O=CC(C(C(C(C(=O)N(C1CCCCC1)C1CCCCC1)NC(=O)C)O)O)O			ChEMBLE_NTD	1	0.404762	0.702381
methyl 5-aminolevulinate	1468384772	APRD01105,DB00992	D08204	CHEMBL1096562	5-[[(2S,3S)-2-acetamido-3-methyl-1-oxopentyl]amino]-4-oxopentanoic acid methyl ester	278001134	CCC(C(C(=O)NCC(=O)CCC(=O)OC)NC(=O)C)C			CHEMBL482448	1	0.404762	0.702381
N-acetyl-L-isoleucine	1468118720			CHEMBL1221841,CHEMBL173413	5-[[(2S,3S)-2-acetamido-3-methyl-1-oxopentyl]amino]-4-oxopentanoic acid methyl ester	278001134	CCC(C(C(=O)NCC(=O)CCC(=O)OC)NC(=O)C)C			CHEMBL482448	1	0.404762	0.702381
(S)-3-Methyl-2-oxopentanoic acid	1467873396		C00671,C03465,C06008		N-acetyl-L-isoleucine	1468118720	CCC(C(C(=O)O)NC(=O)C)C			CHEMBL1221841,CHEMBL173413	1	0.404762	0.702381
2-acetamido-3-methylpentanoic acid methyl ester	6299244			ChEMBLE_NTD	N-acetyl-L-isoleucine	1468118720	CCC(C(C(=O)O)NC(=O)C)C			CHEMBL1221841,CHEMBL173413	1	0.404762	0.702381
N-(1-cyano-2-methylbutyl)acetamide	6301704			ChEMBLE_NTD	N-acetyl-L-isoleucine	1468118720	CCC(C(C(=O)O)NC(=O)C)C			CHEMBL1221841,CHEMBL173413	1	0.404762	0.702381
5-amino-2-[2-(dimethylamino)ethyl]benzo[de]isoquinoline-1,3-dione	501982	DB05022	D10090	CHEMBL428676	N-[2-[2-(dimethylamino)ethyl]-1,3-dioxo-5-benzo[de]isoquinolinyl]acetamide	97465583	CN(CCn1c(=O)c2cc(NC(=O)C)cc3c2c(c1=O)ccc3)C			CHEMBL430189	1	0.403912	0.701956
N-Acetylneuraminate	1467869128	DB01894,DB02344,DB03721,EXPT02292,EXPT02908,EXPT02909	C00270,C19909,C19910	CHEMBL109645,CHEMBL112030,CHEMBL1234621,CHEMBL152452,CHEMBL165084,CHEMBL307262,CHEMBL3138670,CHEMBL3187768	(2R,4R,5S,6S)-5-acetamido-4-hydroxy-2-(pent-4-enylthio)-6-[(1R,2R)-1,2,3-trihydroxypropyl]-2-oxanecarboxylic acid	280331835	C=CCCCSC1(CC(O)C(C(O1)C(C(CO)O)O)NC(=O)C)C(=O)O			CHEMBL242829,CHEMBL563748	1	0.397619	0.69881
Cholesterol	1467868045		C00187,D00040	ChEMBLE_NTD,CHEMBL112570,CHEMBL1597825,CHEMBL1867358,CHEMBL3184306	(2R,4S,5R,6R)-5-acetamido-2-[[(3S,8S,9S,10R,13R,14S,17R)-10,13-dimethyl-17-[(2R)-6-methylheptan-2-yl]-2,3,4,7,8,9,11,12,14,15,16,17-dodecahydro-1H-cyclopenta[a]phenanthren-3-yl]oxy]-4-hydroxy-6-[(1R,2R)-1,2,3-trihydroxypropyl]-2-oxanecarboxylic acid	2455452	OCC(C(C1OC(OC2CCC3(C(=CCC4C3CCC3(C4CCC3C(CCCC(C)C)C)C)C2)C)(CC(C1NC(=O)C)O)C(=O)O)O)O			CHEMBL1204804	1	0.397619	0.69881
N-Acetylneuraminate	1467869128	DB01894,DB02344,DB03721,EXPT02292,EXPT02908,EXPT02909	C00270,C19909,C19910	CHEMBL109645,CHEMBL112030,CHEMBL1234621,CHEMBL152452,CHEMBL165084,CHEMBL307262,CHEMBL3138670,CHEMBL3187768	(2R,4S,5R,6R)-5-acetamido-4-hydroxy-2-[(4-phenylphenyl)methoxy]-6-[(1S,2R)-1,2,3-trihydroxypropyl]-2-oxanecarboxylic acid	280404366	OCC(C(C1OC(OCc2ccc(cc2)c2ccccc2)(CC(C1NC(=O)C)O)C(=O)O)O)O			CHEMBL1206196	1	0.397619	0.69881
N-Acetylneuraminate	1467869128	DB01894,DB02344,DB03721,EXPT02292,EXPT02908,EXPT02909	C00270,C19909,C19910	CHEMBL109645,CHEMBL112030,CHEMBL1234621,CHEMBL152452,CHEMBL165084,CHEMBL307262,CHEMBL3138670,CHEMBL3187768	(2R,4S,5R,6R)-5-acetamido-4-hydroxy-2-[3-(1-naphthalenylmethylamino)-3-oxopropoxy]-6-[(1R,2R)-1,2,3-trihydroxypropyl]-2-oxanecarboxylic acid	129272955	OCC(C(C1OC(OCCC(=O)NCc2cccc3c2cccc3)(CC(C1NC(=O)C)O)C(=O)O)O)O			CHEMBL1160517	1	0.397619	0.69881
N-Acetylneuraminate	1467869128	DB01894,DB02344,DB03721,EXPT02292,EXPT02908,EXPT02909	C00270,C19909,C19910	CHEMBL109645,CHEMBL112030,CHEMBL1234621,CHEMBL152452,CHEMBL165084,CHEMBL307262,CHEMBL3138670,CHEMBL3187768	(2R,4S,5R,6R)-5-acetamido-4-hydroxy-2-[5-oxo-5-[(phenylmethyl)amino]pentoxy]-6-[(1R,2R)-1,2,3-trihydroxypropyl]-2-oxanecarboxylic acid	129272977	OCC(C(C1OC(OCCCCC(=O)NCc2ccccc2)(CC(C1NC(=O)C)O)C(=O)O)O)O			CHEMBL1160868	1	0.397619	0.69881
N-Acetylneuraminate	1467869128	DB01894,DB02344,DB03721,EXPT02292,EXPT02908,EXPT02909	C00270,C19909,C19910	CHEMBL109645,CHEMBL112030,CHEMBL1234621,CHEMBL152452,CHEMBL165084,CHEMBL307262,CHEMBL3138670,CHEMBL3187768	(2S,4S,5R,6R)-5-acetamido-4-hydroxy-2-(4-phenoxyphenoxy)-6-[(1S,2R)-1,2,3-trihydroxypropyl]-2-oxanecarboxylic acid	280404344	OCC(C(C1OC(CC(C1NC(=O)C)O)(Oc1ccc(cc1)Oc1ccccc1)C(=O)O)O)O			CHEMBL1206398,CHEMBL1207328	1	0.397619	0.69881
N-Acetylneuraminate	1467869128	DB01894,DB02344,DB03721,EXPT02292,EXPT02908,EXPT02909	C00270,C19909,C19910	CHEMBL109645,CHEMBL112030,CHEMBL1234621,CHEMBL152452,CHEMBL165084,CHEMBL307262,CHEMBL3138670,CHEMBL3187768	(2S,4S,5R,6R)-5-acetamido-4-hydroxy-2-[(3-phenylphenyl)methoxy]-6-[(1S,2R)-1,2,3-trihydroxypropyl]-2-oxanecarboxylic acid	280404542	OCC(C(C1OC(OCc2cccc(c2)c2ccccc2)(CC(C1NC(=O)C)O)C(=O)O)O)O			CHEMBL1206209	1	0.397619	0.69881
N-Acetylneuraminate	1467869128	DB01894,DB02344,DB03721,EXPT02292,EXPT02908,EXPT02909	C00270,C19909,C19910	CHEMBL109645,CHEMBL112030,CHEMBL1234621,CHEMBL152452,CHEMBL165084,CHEMBL307262,CHEMBL3138670,CHEMBL3187768	(2S,4S,5R,6R)-5-acetamido-4-hydroxy-2-[[(2S,3R,4S,5R,6R)-3,4,5-trihydroxy-6-methoxy-2-oxanyl]methylthio]-6-[(1S,2R)-1,2,3-trihydroxypropyl]-2-oxanecarboxylic acid	5869300	OCC(C(C1OC(SCC2OC(OC)C(C(C2O)O)O)(CC(C1NC(=O)C)O)C(=O)O)O)O			CHEMBL41455	1	0.397619	0.69881
Ginkgetin	1467954376		C10048	CHEMBL377324	(2S,4S,5R,6R)-5-acetamido-4-hydroxy-2-[5-hydroxy-8-[5-(5-hydroxy-7-methoxy-4-oxo-chromen-2-yl)-2-methoxy-phenyl]-2-(4-hydroxyphenyl)-4-oxo-chromen-7-yl]oxy-6-[(1S,2S)-1,2,3-trihydroxypropyl]tetrahydropyran-2-carboxylic acid	101511393	OCC(C(C1OC(CC(C1NC(=O)C)O)(Oc1cc(O)c2c(c1c1cc(ccc1OC)c1cc(=O)c3c(o1)cc(cc3O)OC)oc(cc2=O)c1ccc(cc1)O)C(=O)O)O)O			CHEMBL397342	1	0.397619	0.69881
N-Acetylneuraminate	1467869128	DB01894,DB02344,DB03721,EXPT02292,EXPT02908,EXPT02909	C00270,C19909,C19910	CHEMBL109645,CHEMBL112030,CHEMBL1234621,CHEMBL152452,CHEMBL165084,CHEMBL307262,CHEMBL3138670,CHEMBL3187768	5-acetamido-4-hydroxy-2-[3-[2-(1-oxoprop-2-enylamino)ethylthio]propoxy]-6-(1,2,3-trihydroxypropyl)-2-oxanecarboxylic acid	4710722	OCC(C(C1OC(OCCCSCCNC(=O)C=C)(CC(C1NC(=O)C)O)C(=O)O)O)O			CHEMBL2008167	1	0.397619	0.69881
(2-formyloxy-3-phosphonooxy-propyl) pentanoate	5479805				CMP-N-acetylneuraminate	1467867255	OCC(C(C1OC(CC(C1NC(=O)C)O)(OP(=O)(OCC1OC(C(C1O)O)n1ccc(nc1=O)N)O)C(=O)O)O)O	DB02485,EXPT02309	C00128	CHEMBL1214873,CHEMBL1234647	1	0.397619	0.69881
(2S,4S,5R,6R)-5-acetamido-6-[(1S,2R)-2-[[(2S,4S,5R,6R)-5-acetamido-6-[(1S,2R)-2-[[(2S,4S,5R,6R)-5-acetamido-2-carboxy-4-hydroxy-6-[(1R,2R)-1,2,3-trihydroxypropyl]-2-oxanyl]oxy]-1,3-dihydroxypropyl]-2-carboxy-4-hydroxy-2-oxanyl]oxy]-1,3-dihydroxypropyl]-2-[[(2S,3R,4S,5S,6R)-2-[[(2R,3S,4R,5R,6R)-6-[(E,2S,3R)-2-acetamido-3-hydroxyoctadec-4-enoxy]-4,5-dihydroxy-2-(hydroxymethyl)-3-oxanyl]oxy]-3,5-dih…	545187637				CMP-N-acetylneuraminate	1467867255	OCC(C(C1OC(CC(C1NC(=O)C)O)(OP(=O)(OCC1OC(C(C1O)O)n1ccc(nc1=O)N)O)C(=O)O)O)O	DB02485,EXPT02309	C00128	CHEMBL1214873,CHEMBL1234647	1	0.397619	0.69881
alpha-N-Acetylneuraminyl-2,6-beta-D-galactosyl-1,4-N-acetyl-beta-D-glucosamine	1467906327		C04886		CMP-N-acetylneuraminate	1467867255	OCC(C(C1OC(CC(C1NC(=O)C)O)(OP(=O)(OCC1OC(C(C1O)O)n1ccc(nc1=O)N)O)C(=O)O)O)O	DB02485,EXPT02309	C00128	CHEMBL1214873,CHEMBL1234647	1	0.397619	0.69881
Chloramphenicol	1467875974	APRD00862,DB00446,EXPT00942	C00918,D00104	ChEMBLE_NTD,CHEMBL130,CHEMBL1437336,CHEMBL414400	CMP-N-acetylneuraminate	1467867255	OCC(C(C1OC(CC(C1NC(=O)C)O)(OP(=O)(OCC1OC(C(C1O)O)n1ccc(nc1=O)N)O)C(=O)O)O)O	DB02485,EXPT02309	C00128	CHEMBL1214873,CHEMBL1234647	1	0.397619	0.69881
CMP	1467866276		C00055	CHEMBL1329786,CHEMBL296272,CHEMBL307679,CHEMBL596186	CMP-N-acetylneuraminate	1467867255	OCC(C(C1OC(CC(C1NC(=O)C)O)(OP(=O)(OCC1OC(C(C1O)O)n1ccc(nc1=O)N)O)C(=O)O)O)O	DB02485,EXPT02309	C00128	CHEMBL1214873,CHEMBL1234647	1	0.397619	0.69881
CMP-N-glycoloylneuraminate	1467897851		C03691		CMP-N-acetylneuraminate	1467867255	OCC(C(C1OC(CC(C1NC(=O)C)O)(OP(=O)(OCC1OC(C(C1O)O)n1ccc(nc1=O)N)O)C(=O)O)O)O	DB02485,EXPT02309	C00128	CHEMBL1214873,CHEMBL1234647	1	0.397619	0.69881
CMP-Neu5Gc	1468580882				CMP-N-acetylneuraminate	1467867255	OCC(C(C1OC(CC(C1NC(=O)C)O)(OP(=O)(OCC1OC(C(C1O)O)n1ccc(nc1=O)N)O)C(=O)O)O)O	DB02485,EXPT02309	C00128	CHEMBL1214873,CHEMBL1234647	1	0.397619	0.69881
CTP	1467866360	DB02431,EXPT01053	C00063	CHEMBL223533,CHEMBL3417290	CMP-N-acetylneuraminate	1467867255	OCC(C(C1OC(CC(C1NC(=O)C)O)(OP(=O)(OCC1OC(C(C1O)O)n1ccc(nc1=O)N)O)C(=O)O)O)O	DB02485,EXPT02309	C00128	CHEMBL1214873,CHEMBL1234647	1	0.397619	0.69881
N-Acetyl-9-O-acetylneuraminate	1467900010		C04017		CMP-N-acetylneuraminate	1467867255	OCC(C(C1OC(CC(C1NC(=O)C)O)(OP(=O)(OCC1OC(C(C1O)O)n1ccc(nc1=O)N)O)C(=O)O)O)O	DB02485,EXPT02309	C00128	CHEMBL1214873,CHEMBL1234647	1	0.397619	0.69881
N-Acetylneuraminate	1467869128	DB01894,DB02344,DB03721,EXPT02292,EXPT02908,EXPT02909	C00270,C19909,C19910	CHEMBL109645,CHEMBL112030,CHEMBL1234621,CHEMBL152452,CHEMBL165084,CHEMBL307262,CHEMBL3138670,CHEMBL3187768	CMP-N-acetylneuraminate	1467867255	OCC(C(C1OC(CC(C1NC(=O)C)O)(OP(=O)(OCC1OC(C(C1O)O)n1ccc(nc1=O)N)O)C(=O)O)O)O	DB02485,EXPT02309	C00128	CHEMBL1214873,CHEMBL1234647	1	0.397619	0.69881
2-Deoxy-2,3-dehydro-N-acetylneuraminic acid	1467904028		C04580	CHEMBL1161589,CHEMBL116550,CHEMBL291345,CHEMBL334952,CHEMBL416139,CHEMBL77627,CHEMBL96712	N-Acetylneuraminate	1467869128	OCC(C(C1OC(O)(CC(C1NC(=O)C)O)C(=O)O)O)O	DB01894,DB02344,DB03721,EXPT02292,EXPT02908,EXPT02909	C00270,C19909,C19910	CHEMBL109645,CHEMBL112030,CHEMBL1234621,CHEMBL152452,CHEMBL165084,CHEMBL307262,CHEMBL3138670,CHEMBL3187768	1	0.397619	0.69881
ATP	1467865531	DB00171,EXPT00007,NUTR00017	C00002,D08646	CHEMBL14249	N-Acetylneuraminate	1467869128	OCC(C(C1OC(O)(CC(C1NC(=O)C)O)C(=O)O)O)O	DB01894,DB02344,DB03721,EXPT02292,EXPT02908,EXPT02909	C00270,C19909,C19910	CHEMBL109645,CHEMBL112030,CHEMBL1234621,CHEMBL152452,CHEMBL165084,CHEMBL307262,CHEMBL3138670,CHEMBL3187768	1	0.397619	0.69881
CMP-N-acetylneuraminate	1467867255	DB02485,EXPT02309	C00128	CHEMBL1214873,CHEMBL1234647	N-Acetylneuraminate	1467869128	OCC(C(C1OC(O)(CC(C1NC(=O)C)O)C(=O)O)O)O	DB01894,DB02344,DB03721,EXPT02292,EXPT02908,EXPT02909	C00270,C19909,C19910	CHEMBL109645,CHEMBL112030,CHEMBL1234621,CHEMBL152452,CHEMBL165084,CHEMBL307262,CHEMBL3138670,CHEMBL3187768	1	0.397619	0.69881
DGAL	1467874918		C00767,C00818,C00879,C01807,C21088	CHEMBL1232958	N-Acetylneuraminate	1467869128	OCC(C(C1OC(O)(CC(C1NC(=O)C)O)C(=O)O)O)O	DB01894,DB02344,DB03721,EXPT02292,EXPT02908,EXPT02909	C00270,C19909,C19910	CHEMBL109645,CHEMBL112030,CHEMBL1234621,CHEMBL152452,CHEMBL165084,CHEMBL307262,CHEMBL3138670,CHEMBL3187768	1	0.397619	0.69881
N-Acetyl-4-O-acetylneuraminate	1467899990		C04015		N-Acetylneuraminate	1467869128	OCC(C(C1OC(O)(CC(C1NC(=O)C)O)C(=O)O)O)O	DB01894,DB02344,DB03721,EXPT02292,EXPT02908,EXPT02909	C00270,C19909,C19910	CHEMBL109645,CHEMBL112030,CHEMBL1234621,CHEMBL152452,CHEMBL165084,CHEMBL307262,CHEMBL3138670,CHEMBL3187768	1	0.397619	0.69881
N-Acetyl-7-O-acetylneuraminate	1467900000		C04016		N-Acetylneuraminate	1467869128	OCC(C(C1OC(O)(CC(C1NC(=O)C)O)C(=O)O)O)O	DB01894,DB02344,DB03721,EXPT02292,EXPT02908,EXPT02909	C00270,C19909,C19910	CHEMBL109645,CHEMBL112030,CHEMBL1234621,CHEMBL152452,CHEMBL165084,CHEMBL307262,CHEMBL3138670,CHEMBL3187768	1	0.397619	0.69881
N-Acetyl-9-O-acetylneuraminate	1467900010		C04017		N-Acetylneuraminate	1467869128	OCC(C(C1OC(O)(CC(C1NC(=O)C)O)C(=O)O)O)O	DB01894,DB02344,DB03721,EXPT02292,EXPT02908,EXPT02909	C00270,C19909,C19910	CHEMBL109645,CHEMBL112030,CHEMBL1234621,CHEMBL152452,CHEMBL165084,CHEMBL307262,CHEMBL3138670,CHEMBL3187768	1	0.397619	0.69881
N-Acetyl-D-glucosamine	1467867422	DB03109,EXPT02281	C00140,C00645,C01132,C02711,C03136,C03878,C05021,C20328,C21036,C21039,C21049,C21052,C21061	ChEMBLE_NTD,CHEMBL1210905,CHEMBL1231391,CHEMBL1414815,CHEMBL240524,CHEMBL39064,CHEMBL447878,CHEMBL469447,CHEMBL83479	N-Acetylneuraminate	1467869128	OCC(C(C1OC(O)(CC(C1NC(=O)C)O)C(=O)O)O)O	DB01894,DB02344,DB03721,EXPT02292,EXPT02908,EXPT02909	C00270,C19909,C19910	CHEMBL109645,CHEMBL112030,CHEMBL1234621,CHEMBL152452,CHEMBL165084,CHEMBL307262,CHEMBL3138670,CHEMBL3187768	1	0.397619	0.69881
N-Acetyl-D-mannosamine	1468065130		C00645	CHEMBL3182062	N-Acetylneuraminate	1467869128	OCC(C(C1OC(O)(CC(C1NC(=O)C)O)C(=O)O)O)O	DB01894,DB02344,DB03721,EXPT02292,EXPT02908,EXPT02909	C00270,C19909,C19910	CHEMBL109645,CHEMBL112030,CHEMBL1234621,CHEMBL152452,CHEMBL165084,CHEMBL307262,CHEMBL3138670,CHEMBL3187768	1	0.397619	0.69881
N-Acetylneuraminate 9-phosphate	1467916172		C06241	CHEMBL2402117	N-Acetylneuraminate	1467869128	OCC(C(C1OC(O)(CC(C1NC(=O)C)O)C(=O)O)O)O	DB01894,DB02344,DB03721,EXPT02292,EXPT02908,EXPT02909	C00270,C19909,C19910	CHEMBL109645,CHEMBL112030,CHEMBL1234621,CHEMBL152452,CHEMBL165084,CHEMBL307262,CHEMBL3138670,CHEMBL3187768	1	0.397619	0.69881
N-Glycoloyl-neuraminate	1467895879		C03410	CHEMBL496421	N-Acetylneuraminate	1467869128	OCC(C(C1OC(O)(CC(C1NC(=O)C)O)C(=O)O)O)O	DB01894,DB02344,DB03721,EXPT02292,EXPT02908,EXPT02909	C00270,C19909,C19910	CHEMBL109645,CHEMBL112030,CHEMBL1234621,CHEMBL152452,CHEMBL165084,CHEMBL307262,CHEMBL3138670,CHEMBL3187768	1	0.397619	0.69881
Neuraminic acid	1467918121		C06469		N-Acetylneuraminate	1467869128	OCC(C(C1OC(O)(CC(C1NC(=O)C)O)C(=O)O)O)O	DB01894,DB02344,DB03721,EXPT02292,EXPT02908,EXPT02909	C00270,C19909,C19910	CHEMBL109645,CHEMBL112030,CHEMBL1234621,CHEMBL152452,CHEMBL165084,CHEMBL307262,CHEMBL3138670,CHEMBL3187768	1	0.397619	0.69881
Phosphoenolpyruvate	1467866507		C00074	CHEMBL1235228	N-Acetylneuraminate	1467869128	OCC(C(C1OC(O)(CC(C1NC(=O)C)O)C(=O)O)O)O	DB01894,DB02344,DB03721,EXPT02292,EXPT02908,EXPT02909	C00270,C19909,C19910	CHEMBL109645,CHEMBL112030,CHEMBL1234621,CHEMBL152452,CHEMBL165084,CHEMBL307262,CHEMBL3138670,CHEMBL3187768	1	0.397619	0.69881
(2R,3R,4S)-3-acetamido-4-guanidino-2-[methyl(propyl)carbamoyl]-3,4-dihydro-2H-pyran-6-carboxylic acid	5491088	DB03503,EXPT01521		CHEMBL300461,CHEMBL369191	(2R,3R,4S)-3-acetamido-4-guanidino-2-(methylcarbamoyl)-3,4-dihydro-2H-pyran-6-carboxylic acid	5992567	CNC(=O)C1OC(=CC(C1NC(=O)C)N=C(N)N)C(=O)O			CHEMBL319143	1	0.392857	0.696429
(2R,3R,4S)-3-acetamido-4-guanidino-2-[methyl(propyl)carbamoyl]-3,4-dihydro-2H-pyran-6-carboxylic acid	5491088	DB03503,EXPT01521		CHEMBL300461,CHEMBL369191	(2R,3R,4S)-3-acetamido-4-guanidino-2-(propylcarbamoyl)-3,4-dihydro-2H-pyran-6-carboxylic acid	5992600	CCCNC(=O)C1OC(=CC(C1NC(=O)C)N=C(N)N)C(=O)O			CHEMBL54149	1	0.392857	0.696429
1-Phospho-alpha-D-galacturonate	1467900146		C04037,C05385		Chondritinsulfate	1468398412	CC(=O)NC1C(O)OC(C(C1OC1OC(C(=O)O)C(C(C1O)O)O)O)OS(=O)(=O)O			ChEMBLE MALARIA	1	0.392857	0.696429
4-Deoxy-beta-D-gluc-4-enuronosyl-(1,3)-N-acetyl-D-galactosamine 6-sulfate	1467906166		C04865		Chondritinsulfate	1468398412	CC(=O)NC1C(O)OC(C(C1OC1OC(C(=O)O)C(C(C1O)O)O)O)OS(=O)(=O)O			ChEMBLE MALARIA	1	0.392857	0.696429
N-Acetyl-D-glucosamine	1467867422	DB03109,EXPT02281	C00140,C00645,C01132,C02711,C03136,C03878,C05021,C20328,C21036,C21039,C21049,C21052,C21061	ChEMBLE_NTD,CHEMBL1210905,CHEMBL1231391,CHEMBL1414815,CHEMBL240524,CHEMBL39064,CHEMBL447878,CHEMBL469447,CHEMBL83479	Chondritinsulfate	1468398412	CC(=O)NC1C(O)OC(C(C1OC1OC(C(=O)O)C(C(C1O)O)O)O)OS(=O)(=O)O			ChEMBLE MALARIA	1	0.392857	0.696429
2-[2-[(2,5-dimethoxyphenyl)methylidene]hydrazinyl]-5-propan-2-yl-4-thiazolone	6324292			ChEMBLE_NTD	2,3-dihydroxy-10,13-dimethyl-17-(6-methylheptan-2-yl)-1,2,3,7,8,9,11,12,14,15,16,17-dodecahydrocyclopenta[a]phenanthren-6-one	6327807	COc1c(OC)cc2c(c1OC)C13CCC(O1)(OC)C(=O)C=C3C(CC2)NC(=O)C			ChEMBLE_NTD	1	0.389835	0.694918
N-[4-[4-(4-methyl-1-piperazinyl)phenyl]sulfonylphenyl]acetamide	6327209			ChEMBLE_NTD	2,3-dihydroxy-10,13-dimethyl-17-(6-methylheptan-2-yl)-1,2,3,7,8,9,11,12,14,15,16,17-dodecahydrocyclopenta[a]phenanthren-6-one	6327807	COc1c(OC)cc2c(c1OC)C13CCC(O1)(OC)C(=O)C=C3C(CC2)NC(=O)C			ChEMBLE_NTD	1	0.389835	0.694918
2-Aminoestra-1,3,5(10)-triene-3,17beta-diol	1467997160		C15006	CHEMBL1627946	N-[(8R,9S,13S,14S,17S)-3,17-dihydroxy-13-methyl-6,7,8,9,11,12,14,15,16,17-decahydrocyclopenta[a]phenanthren-2-yl]acetamide	4889275	CC(=O)Nc1cc2c(cc1O)CCC1C2CCC2(C1CCC2O)C			CHEMBL1627843	1	0.385488	0.692744
2-Acetamidofluorene	1467891292		C02778	CHEMBL311469	3-Hydroxy-2-acetamidofluorene	1467993509	CC(=O)Nc1cc2Cc3c(c2cc1O)cccc3		C14656	CHEMBL296830	1	0.384524	0.692262
1-Hydroxy-2-acetamidofluorene	1467991593		C14481	CHEMBL50511	N-(1-bromo-9H-fluoren-2-yl)acetamide	3622994	CC(=O)Nc1ccc2c(c1Br)Cc1c2cccc1			CHEMBL1722576	1	0.384524	0.692262
2-Acetamidofluorene	1467891292		C02778	CHEMBL311469	N-(1-bromo-9H-fluoren-2-yl)acetamide	3622994	CC(=O)Nc1ccc2c(c1Br)Cc1c2cccc1			CHEMBL1722576	1	0.384524	0.692262
2-Acetamidofluorene	1467891292		C02778	CHEMBL311469	N-(3-bromo-9H-fluoren-2-yl)acetamide	3672902	CC(=O)Nc1cc2Cc3c(c2cc1Br)cccc3			CHEMBL1734120	1	0.384524	0.692262
3-Hydroxy-2-acetamidofluorene	1467993509		C14656	CHEMBL296830	N-(3-bromo-9H-fluoren-2-yl)acetamide	3672902	CC(=O)Nc1cc2Cc3c(c2cc1Br)cccc3			CHEMBL1734120	1	0.384524	0.692262
2-Acetamidofluorene	1467891292		C02778	CHEMBL311469	N-(3-chloro-9H-fluoren-2-yl)acetamide	558464	CC(=O)Nc1cc2Cc3c(c2cc1Cl)cccc3			CHEMBL1730855	1	0.384524	0.692262
3-Hydroxy-2-acetamidofluorene	1467993509		C14656	CHEMBL296830	N-(3-chloro-9H-fluoren-2-yl)acetamide	558464	CC(=O)Nc1cc2Cc3c(c2cc1Cl)cccc3			CHEMBL1730855	1	0.384524	0.692262
3-Hydroxy-2-acetamidofluorene	1467993509		C14656	CHEMBL296830	N-(3-methoxy-9H-fluoren-2-yl)acetamide	99613247	COc1cc2c(cc1NC(=O)C)Cc1c2cccc1			CHEMBL83223	1	0.384524	0.692262
1-Hydroxy-2-acetamidofluorene	1467991593		C14481	CHEMBL50511	N-[1-(methylthio)-9H-fluoren-2-yl]acetamide	2879949	CSc1c(ccc2c1Cc1c2cccc1)NC(=O)C			ChEMBLE_NTD	1	0.384524	0.692262
N-[4-(3,4-dichlorophenyl)tetralin-1-yl]-N-methyl-acetamide	6191881			ChEMBLE_NTD	N-[4-(3,4-dichlorophenyl)tetralin-1-yl]acetamide	6191892	CC(=O)NC1CCC(c2c1cccc2)c1ccc(c(c1)Cl)Cl			ChEMBLE_NTD	1	0.380102	0.690051
norsertraline	1469266165	DB05954,DB12305	D10700	CHEMBL3301595,CHEMBL40733	N-[4-(3,4-dichlorophenyl)tetralin-1-yl]acetamide	6191892	CC(=O)NC1CCC(c2c1cccc2)c1ccc(c(c1)Cl)Cl			ChEMBLE_NTD	1	0.380102	0.690051
5-Aminoacenaphthene	1468036267		C19319	CHEMBL1557111	N-(1,2-dihydroacenaphthylen-5-yl)acetamide	4506353	CC(=O)Nc1ccc2c3c1cccc3CC2			CHEMBL1866750	1	0.379252	0.689626
1-Amino-2-methylanthraquinone	1468036277		C19320	CHEMBL1413787	N-(2-methyl-9,10-dioxo-1-anthryl)acetamide	4699379	CC(=O)Nc1c(C)ccc2c1C(=O)c1ccccc1C2=O			CHEMBL1971377	1	0.370408	0.685204
N-[(7S)-3-hydroxy-1,2-dimethoxy-10-(methylthio)-9-oxo-6,7-dihydro-5H-benzo[a]heptalen-7-yl]acetamide	1976630			ChEMBLE_NTD,CHEMBL277998,CHEMBL320802	(7-acetamido-1,2-dimethoxy-10-methylsulfanyl-9-oxo-6,7-dihydro-5H-benzo[a]heptalen-3-yl) acetate	6325272	COc1c(OC)c(OC(=O)C)cc2c1c1ccc(c(=O)cc1C(CC2)NC(=O)C)SC			ChEMBLE_NTD,CHEMBL347182	1	0.359524	0.679762
N-[(7S)-2-hydroxy-1,3,10-trimethoxy-9-oxo-6,7-dihydro-5H-benzo[a]heptalen-7-yl]acetamide	241313			ChEMBLE_NTD,CHEMBL1080,CHEMBL325328	2-phenoxy-N-(1,2,3,10-tetramethoxy-9-oxo-6,7-dihydro-5H-benzo[a]heptalen-7-yl)acetamide	2139608	COc1ccc2c(cc1=O)C(CCc1c2c2OCOc2c(c1)OC)NC(=O)C			CHEMBL28028	1	0.359524	0.679762
Deacetylcolchicine	1468012998		C16712	CHEMBL1063,CHEMBL1178292	Colchicine	1467928119	COc1c(OC)cc2c(c1OC)c1ccc(c(=O)cc1C(CC2)NC(=O)C)OC		C07592,D00570	ChEMBLE_NTD,CHEMBL107,CHEMBL330320,CHEMBL87	1	0.359524	0.679762
N-[(7S)-2-hydroxy-1,3,10-trimethoxy-9-oxo-6,7-dihydro-5H-benzo[a]heptalen-7-yl]acetamide	241313			ChEMBLE_NTD,CHEMBL1080,CHEMBL325328	Colchicine	1467928119	COc1c(OC)cc2c(c1OC)c1ccc(c(=O)cc1C(CC2)NC(=O)C)OC		C07592,D00570	ChEMBLE_NTD,CHEMBL107,CHEMBL330320,CHEMBL87	1	0.359524	0.679762
N-methyl-N-[(7S)-1,2,3,10-tetramethoxy-9-oxo-6,7-dihydro-5H-benzo[a]heptalen-7-yl]acetamide	241324			ChEMBLE_NTD,CHEMBL89261	Colchicine	1467928119	COc1c(OC)cc2c(c1OC)c1ccc(c(=O)cc1C(CC2)NC(=O)C)OC		C07592,D00570	ChEMBLE_NTD,CHEMBL107,CHEMBL330320,CHEMBL87	1	0.359524	0.679762
N-[(7S)-2-hydroxy-1,3,10-trimethoxy-9-oxo-6,7-dihydro-5H-benzo[a]heptalen-7-yl]acetamide	241313			ChEMBLE_NTD,CHEMBL1080,CHEMBL325328	N-(1,2-dihydroxy-3,10-dimethoxy-9-oxo-6,7-dihydro-5H-benzo[a]heptalen-7-yl)acetamide	2139586	COc1ccc2c(cc1=O)C(CCc1c2c(O)c(c(c1)OC)O)NC(=O)C			CHEMBL1975605,CHEMBL281037	1	0.359524	0.679762
N-[(7S)-3-hydroxy-1,2-dimethoxy-10-(methylthio)-9-oxo-6,7-dihydro-5H-benzo[a]heptalen-7-yl]acetamide	1976630			ChEMBLE_NTD,CHEMBL277998,CHEMBL320802	N-[(7S)-1,2,3-trimethoxy-10-(methylthio)-9-oxo-6,7-dihydro-5H-benzo[a]heptalen-7-yl]acetamide	180730	COc1c2c(CCC(c3c2ccc(c(=O)c3)SC)NC(=O)C)cc(c1OC)OC			CHEMBL18981,CHEMBL262394,CHEMBL273938	1	0.359524	0.679762
ethyl N-(7-acetamido-1,2,3-trimethoxy-9-oxo-6,7-dihydro-5H-benzo[a]heptalen-10-yl)carbamate	6328194			ChEMBLE_NTD	N-[(7S)-10-amino-1,2,3-trimethoxy-9-oxo-6,7-dihydro-5H-benzo[a]heptalen-7-yl]acetamide	188309	COc1c(OC)cc2c(c1OC)c1ccc(c(=O)cc1C(CC2)NC(=O)C)N			CHEMBL326181,CHEMBL357889	1	0.359524	0.679762
N-[(7S)-2-hydroxy-1,3,10-trimethoxy-9-oxo-6,7-dihydro-5H-benzo[a]heptalen-7-yl]acetamide	241313			ChEMBLE_NTD,CHEMBL1080,CHEMBL325328	N-[(7S)-2,10-dihydroxy-1,3-dimethoxy-9-oxo-6,7-dihydro-5H-benzo[a]heptalen-7-yl]acetamide	5526317	COc1c2c(CCC(c3c2ccc(c(=O)c3)O)NC(=O)C)cc(c1O)OC			CHEMBL464647	1	0.359524	0.679762
N-[(7S)-3-hydroxy-1,2-dimethoxy-10-(methylthio)-9-oxo-6,7-dihydro-5H-benzo[a]heptalen-7-yl]acetamide	1976630			ChEMBLE_NTD,CHEMBL277998,CHEMBL320802	N-[(7S)-2,3-dihydroxy-1-methoxy-10-(methylthio)-9-oxo-6,7-dihydro-5H-benzo[a]heptalen-7-yl]acetamide	106623835	COc1c2c(CCC(c3c2ccc(c(=O)c3)SC)NC(=O)C)cc(c1O)O			CHEMBL301851	1	0.359524	0.679762
2-acetamido-N-[1-(ethylamino)-1-oxopropan-2-yl]propanamide	6333583			ChEMBLE_NTD	(2R)-2-[[(2S)-2-[[(2S)-2-acetamidopropanoyl]amino]propanoyl]amino]propanoic acid	2016095	CC(=O)NC(C(=O)NC(C(=O)NC(C(=O)O)C)C)C			CHEMBL173514	1	0.357143	0.678571
2-acetamido-N-[1-[[1-(ethylamino)-1-oxopropan-2-yl]amino]-1-oxopropan-2-yl]propanamide	6334163			ChEMBLE_NTD	(2R)-2-[[(2S)-2-[[(2S)-2-acetamidopropanoyl]amino]propanoyl]amino]propanoic acid	2016095	CC(=O)NC(C(=O)NC(C(=O)NC(C(=O)O)C)C)C			CHEMBL173514	1	0.357143	0.678571
2-acetamido-N-[1-[[1-[[1-(ethylamino)-1-oxopropan-2-yl]amino]-1-oxopropan-2-yl]amino]-1-oxopropan-2-yl]propanamide	6334185			ChEMBLE_NTD	(2R)-2-[[(2S)-2-[[(2S)-2-acetamidopropanoyl]amino]propanoyl]amino]propanoic acid	2016095	CC(=O)NC(C(=O)NC(C(=O)NC(C(=O)O)C)C)C			CHEMBL173514	1	0.357143	0.678571
D-Alanyl-D-alanine	1467876684		C00993	CHEMBL17697,CHEMBL1814487,CHEMBL1814491,CHEMBL299420,CHEMBL52461	(2R)-2-[[(2S)-2-[[(2S)-2-acetamidopropanoyl]amino]propanoyl]amino]propanoic acid	2016095	CC(=O)NC(C(=O)NC(C(=O)NC(C(=O)O)C)C)C			CHEMBL173514	1	0.357143	0.678571
N-Acetyl-ala-ala-ala-methylester	1467969275		C11329		(2R)-2-[[(2S)-2-[[(2S)-2-acetamidopropanoyl]amino]propanoyl]amino]propanoic acid	2016095	CC(=O)NC(C(=O)NC(C(=O)NC(C(=O)O)C)C)C			CHEMBL173514	1	0.357143	0.678571
Phenethylamine	1467908642		C05332	CHEMBL610	(2R)-2-acetamido-N-(2-phenylethyl)propanamide	108905642	CC(C(=O)NCCc1ccccc1)NC(=O)C			CHEMBL331044	1	0.357143	0.678571
Phenylacetaldehyde	1467872719		C00601	CHEMBL1233464	(2R)-2-acetamido-N-(2-phenylethyl)propanamide	108905642	CC(C(=O)NCCc1ccccc1)NC(=O)C			CHEMBL331044	1	0.357143	0.678571
2-amino-N-methylpropanamide	6329006			ChEMBLE_NTD	(2R)-2-acetamido-N-methylpropanamide	2134871	CNC(=O)C(NC(=O)C)C			CHEMBL153899	1	0.357143	0.678571
2-acetamido-N-[1-(ethylamino)-1-oxopropan-2-yl]propanamide	6333583			ChEMBLE_NTD	(2S)-2-[[(2R)-2-acetamidopropanoyl]amino]propanoic acid	2635626	CC(=O)NC(C(=O)NC(C(=O)O)C)C			CHEMBL173331,CHEMBL2372592	1	0.357143	0.678571
2-acetamido-N-[1-(methylamino)-1-oxopropan-2-yl]propanamide	6331924			ChEMBLE_NTD	(2S)-2-[[(2R)-2-acetamidopropanoyl]amino]propanoic acid	2635626	CC(=O)NC(C(=O)NC(C(=O)O)C)C			CHEMBL173331,CHEMBL2372592	1	0.357143	0.678571
2-acetamido-N-[1-[[1-(ethylamino)-1-oxopropan-2-yl]amino]-1-oxopropan-2-yl]propanamide	6334163			ChEMBLE_NTD	(2S)-2-[[(2R)-2-acetamidopropanoyl]amino]propanoic acid	2635626	CC(=O)NC(C(=O)NC(C(=O)O)C)C			CHEMBL173331,CHEMBL2372592	1	0.357143	0.678571
2-acetamido-N-[1-[[1-[[1-(ethylamino)-1-oxopropan-2-yl]amino]-1-oxopropan-2-yl]amino]-1-oxopropan-2-yl]propanamide	6334185			ChEMBLE_NTD	(2S)-2-[[(2R)-2-acetamidopropanoyl]amino]propanoic acid	2635626	CC(=O)NC(C(=O)NC(C(=O)O)C)C			CHEMBL173331,CHEMBL2372592	1	0.357143	0.678571
2-acetamido-N-ethylpropanamide	6331891			ChEMBLE_NTD	(2S)-2-[[(2R)-2-acetamidopropanoyl]amino]propanoic acid	2635626	CC(=O)NC(C(=O)NC(C(=O)O)C)C			CHEMBL173331,CHEMBL2372592	1	0.357143	0.678571
butyl 2-(2-acetamidopropanoylamino)propanoate	6331935			ChEMBLE_NTD	(2S)-2-[[(2R)-2-acetamidopropanoyl]amino]propanoic acid	2635626	CC(=O)NC(C(=O)NC(C(=O)O)C)C			CHEMBL173331,CHEMBL2372592	1	0.357143	0.678571
D-Alanyl-D-alanine	1467876684		C00993	CHEMBL17697,CHEMBL1814487,CHEMBL1814491,CHEMBL299420,CHEMBL52461	(2S)-2-[[(2R)-2-acetamidopropanoyl]amino]propanoic acid	2635626	CC(=O)NC(C(=O)NC(C(=O)O)C)C			CHEMBL173331,CHEMBL2372592	1	0.357143	0.678571
N-Acetyl-ala-ala-ala-methylester	1467969275		C11329		(2S)-2-[[(2R)-2-acetamidopropanoyl]amino]propanoic acid	2635626	CC(=O)NC(C(=O)NC(C(=O)O)C)C			CHEMBL173331,CHEMBL2372592	1	0.357143	0.678571
Val-Val	1468284517			CHEMBL54552	(2S)-2-[[(2S)-2-[[(2S,3S)-2-[[(2S)-2-acetamidopropanoyl]amino]-3-methyl-pentanoyl]amino]-3-methyl-butanoyl]amino]-3-methyl-butanoic acid	382386438	CCC(C(C(=O)NC(C(=O)NC(C(=O)O)C(C)C)C(C)C)NC(=O)C(NC(=O)C)C)C			CHEMBL1926950	1	0.357143	0.678571
Acetylleucyl-leucyl-norleucinal	1467969032		C11306	CHEMBL151937,CHEMBL304784	(2S)-2-[[(2S)-2-[[(2S)-2-acetamido-4-methyl-pentanoyl]amino]-4-methyl-pentanoyl]amino]hexanoic acid	5466786	CCCCC(C(=O)O)NC(=O)C(NC(=O)C(NC(=O)C)CC(C)C)CC(C)C			CHEMBL314442	1	0.357143	0.678571
Leucyl-leucyl-norleucine	1467969266		C11328		(2S)-2-[[(2S)-2-[[(2S)-2-acetamido-4-methyl-pentanoyl]amino]-4-methyl-pentanoyl]amino]hexanoic acid	5466786	CCCCC(C(=O)O)NC(=O)C(NC(=O)C(NC(=O)C)CC(C)C)CC(C)C			CHEMBL314442	1	0.357143	0.678571
N-Acetyl-leucyl-leucine	1467969317		C11333	CHEMBL368756	(2S)-2-[[(2S)-2-[[(2S)-2-acetamido-4-methyl-pentanoyl]amino]-4-methyl-pentanoyl]amino]hexanoic acid	5466786	CCCCC(C(=O)O)NC(=O)C(NC(=O)C(NC(=O)C)CC(C)C)CC(C)C			CHEMBL314442	1	0.357143	0.678571
L-arginine amide	1468118480	DB02299,EXPT00385			(2S)-2-[[(2S)-2-acetamidopropanoyl]amino]-5-guanidino-pentanamide	299388232	CC(=O)NC(C(=O)NC(C(=O)N)CCCN=C(N)N)C			CHEMBL1085605	1	0.357143	0.678571
N-Acetyl-L-leucine	1467890765		C02710,D07350	ChEMBLE_NTD,CHEMBL174357,CHEMBL1875805,CHEMBL56021	(2S)-2-acetamido-4-methyl-N-(4-oxo-3-oxolanyl)pentanamide	279165077	CC(CC(C(=O)NC1COCC1=O)NC(=O)C)C			CHEMBL61333	1	0.357143	0.678571
N-Acetyl-L-leucine	1467890765		C02710,D07350	ChEMBLE_NTD,CHEMBL174357,CHEMBL1875805,CHEMBL56021	(2S)-2-acetamido-N-(benzylcarbamoyl)-4-methyl-pentanamide	21848193	CC(CC(C(=O)NC(=O)NCc1ccccc1)NC(=O)C)C			CHEMBL1454571	1	0.357143	0.678571
N-Acetyl-leucyl-leucine	1467969317		C11333	CHEMBL368756	(2S)-2-acetamido-N-[(1S)-1-[[(1S)-1-formyl-3-methylsulfonyl-propyl]carbamoyl]-3-methyl-butyl]-4-methyl-pentanamide	279409478	O=CC(NC(=O)C(NC(=O)C(NC(=O)C)CC(C)C)CC(C)C)CCS(=O)(=O)C			CHEMBL95363	1	0.357143	0.678571
Quercetin	1467870413	DB04216,EXPT02732	C00389	ChEMBLE MALARIA,CHEMBL50	[2-(3,4-dihydroxyphenyl)-5,7-dihydroxy-4-oxo-chromen-3-yl] (2S)-2-acetamido-4-methyl-pentanoate	261217164	CC(CC(C(=O)Oc1c(oc2c(c1=O)c(O)cc(c2)O)c1ccc(c(c1)O)O)NC(=O)C)C			CHEMBL561492	1	0.357143	0.678571
2-[[2-[(2-acetamido-1-oxopropyl)amino]-1-oxoethyl]amino]acetic acid methyl ester	6331913			ChEMBLE_NTD	2-(2-acetamidopropanoylamino)acetic acid	267072730	OC(=O)CNC(=O)C(NC(=O)C)C			CHEMBL170636	1	0.357143	0.678571
butyl 2-(2-acetamidopropanoylamino)acetate	6331814			ChEMBLE_NTD	2-(2-acetamidopropanoylamino)acetic acid	267072730	OC(=O)CNC(=O)C(NC(=O)C)C			CHEMBL170636	1	0.357143	0.678571
N-Acetyl-L-leucine	1467890765		C02710,D07350	ChEMBLE_NTD,CHEMBL174357,CHEMBL1875805,CHEMBL56021	2-[[(2S)-2-acetamido-4-methyl-1-oxopentyl]amino]acetic acid methyl ester	279133466	COC(=O)CNC(=O)C(NC(=O)C)CC(C)C			CHEMBL56925	1	0.357143	0.678571
N-Acetyl-L-leucine	1467890765		C02710,D07350	ChEMBLE_NTD,CHEMBL174357,CHEMBL1875805,CHEMBL56021	2-[[2-[[(2S)-2-acetamido-4-methyl-pentanoyl]amino]acetyl]amino]acetic acid	279871694	CC(CC(C(=O)NCC(=O)NCC(=O)O)NC(=O)C)C			CHEMBL174143,CHEMBL368297	1	0.357143	0.678571
N-Acetyl-L-leucine	1467890765		C02710,D07350	ChEMBLE_NTD,CHEMBL174357,CHEMBL1875805,CHEMBL56021	2-[2-[[(2S)-2-acetamido-4-methyl-pentanoyl]amino]acetyl]oxyacetic acid	533325803	CC(CC(C(=O)NCC(=O)OCC(=O)O)NC(=O)C)C			CHEMBL2207141	1	0.357143	0.678571
Aromatic aldehyde	1467868131		C00193,C00261,D02314	CHEMBL15972	2-acetamido-2-amino-N-benzyl-acetamide	126521695	NC(C(=O)NCc1ccccc1)NC(=O)C			CHEMBL312718	1	0.357143	0.678571
Benzylamine	1468002529	DB02464,EXPT00400	C15562	CHEMBL522	2-acetamido-2-amino-N-benzyl-acetamide	126521695	NC(C(=O)NCc1ccccc1)NC(=O)C			CHEMBL312718	1	0.357143	0.678571
&beta;-cyano-L-alanine	1469299813			ChEMBLE_NTD	2-acetamido-2-cyanoacetate	156990929	N#CC(C(=O)[O-])NC(=O)C			CHEMBL2253315	1	0.357143	0.678571
2-acetamido-2-cyanoacetamide	6288379			ChEMBLE_NTD	2-acetamido-2-cyanoacetate	156990929	N#CC(C(=O)[O-])NC(=O)C			CHEMBL2253315	1	0.357143	0.678571
2-[acetyl(hydroxy)amino]-4-methylpentanoic acid methyl ester	45917092	DB07989			2-acetamido-4-methylpentanoic acid methyl ester	6501937	COC(=O)C(NC(=O)C)CC(C)C			CHEMBL58991	1	0.357143	0.678571
N-Acetyl-L-leucine	1467890765		C02710,D07350	ChEMBLE_NTD,CHEMBL174357,CHEMBL1875805,CHEMBL56021	2-acetamido-4-methylpentanoic acid methyl ester	6501937	COC(=O)C(NC(=O)C)CC(C)C			CHEMBL58991	1	0.357143	0.678571
Leupeptin	1467881807		C01591	ChEMBLE MALARIA,CHEMBL191881,CHEMBL429947,CHEMBL433692	2-acetamido-N-[1-[(1-formyl-4-ureido-butyl)carbamoyl]-3-methyl-butyl]-4-methyl-pentanamide	279875695	O=CC(NC(=O)C(NC(=O)C(NC(=O)C)CC(C)C)CC(C)C)CCCNC(=O)N			CHEMBL2371636	1	0.357143	0.678571
N-Acetyl-leucyl-leucine	1467969317		C11333	CHEMBL368756	2-acetamido-N-[1-[(1-formyl-4-ureido-butyl)carbamoyl]-3-methyl-butyl]-4-methyl-pentanamide	279875695	O=CC(NC(=O)C(NC(=O)C(NC(=O)C)CC(C)C)CC(C)C)CCCNC(=O)N			CHEMBL2371636	1	0.357143	0.678571
2-amino-N-[1-(ethylamino)-1-oxopropan-2-yl]propanamide	6332468			ChEMBLE_NTD	2-acetamido-N-[1-[[1-(ethylamino)-1-oxopropan-2-yl]amino]-1-oxopropan-2-yl]propanamide	6334163	CCNC(=O)C(NC(=O)C(NC(=O)C(NC(=O)C)C)C)C			ChEMBLE_NTD	1	0.357143	0.678571
2-amino-N-[1-[[1-(ethylamino)-1-oxopropan-2-yl]amino]-1-oxopropan-2-yl]propanamide	6333858			ChEMBLE_NTD	2-acetamido-N-[1-[[1-(ethylamino)-1-oxopropan-2-yl]amino]-1-oxopropan-2-yl]propanamide	6334163	CCNC(=O)C(NC(=O)C(NC(=O)C(NC(=O)C)C)C)C			ChEMBLE_NTD	1	0.357143	0.678571
2-amino-N-[1-(ethylamino)-1-oxopropan-2-yl]propanamide	6332468			ChEMBLE_NTD	2-acetamido-N-[1-[[1-[[1-(ethylamino)-1-oxopropan-2-yl]amino]-1-oxopropan-2-yl]amino]-1-oxopropan-2-yl]propanamide	6334185	CCNC(=O)C(NC(=O)C(NC(=O)C(NC(=O)C(NC(=O)C)C)C)C)C			ChEMBLE_NTD	1	0.357143	0.678571
2-amino-N-[1-[[1-(ethylamino)-1-oxopropan-2-yl]amino]-1-oxopropan-2-yl]propanamide	6333858			ChEMBLE_NTD	2-acetamido-N-[1-[[1-[[1-(ethylamino)-1-oxopropan-2-yl]amino]-1-oxopropan-2-yl]amino]-1-oxopropan-2-yl]propanamide	6334185	CCNC(=O)C(NC(=O)C(NC(=O)C(NC(=O)C(NC(=O)C)C)C)C)C			ChEMBLE_NTD	1	0.357143	0.678571
2-amino-N-[1-[[1-[[1-(ethylamino)-1-oxopropan-2-yl]amino]-1-oxopropan-2-yl]amino]-1-oxopropan-2-yl]propanamide	6333248			ChEMBLE_NTD	2-acetamido-N-[1-[[1-[[1-(ethylamino)-1-oxopropan-2-yl]amino]-1-oxopropan-2-yl]amino]-1-oxopropan-2-yl]propanamide	6334185	CCNC(=O)C(NC(=O)C(NC(=O)C(NC(=O)C(NC(=O)C)C)C)C)C			ChEMBLE_NTD	1	0.357143	0.678571
Benzophenone	1467917029	DB01878,EXPT00794	C06354	ChEMBLE MALARIA,CHEMBL90039	2-acetamido-N-benzhydryl-propanamide	279744418	CC(C(=O)NC(c1ccccc1)c1ccccc1)NC(=O)C			CHEMBL157449	1	0.357143	0.678571
Aromatic aldehyde	1467868131		C00193,C00261,D02314	CHEMBL15972	2-acetamido-N-benzyl-2-hydroxy-acetamide	126521948	OC(C(=O)NCc1ccccc1)NC(=O)C			CHEMBL81009	1	0.357143	0.678571
Benzylamine	1468002529	DB02464,EXPT00400	C15562	CHEMBL522	2-acetamido-N-benzyl-2-hydroxy-acetamide	126521948	OC(C(=O)NCc1ccccc1)NC(=O)C			CHEMBL81009	1	0.357143	0.678571
Benzylamine	1468002529	DB02464,EXPT00400	C15562	CHEMBL522	2-acetamido-N-benzyl-2-methoxy-acetamide	124994514	COC(C(=O)NCc1ccccc1)NC(=O)C			CHEMBL81129	1	0.357143	0.678571
Benzylamine	1468002529	DB02464,EXPT00400	C15562	CHEMBL522	2-acetamido-N-benzyl-2-methylsulfanyl-acetamide	126521860	CSC(C(=O)NCc1ccccc1)NC(=O)C			CHEMBL419836	1	0.357143	0.678571
Aromatic aldehyde	1467868131		C00193,C00261,D02314	CHEMBL15972	2-acetamido-N-benzyl-propanamide	2472433	CC(C(=O)NCc1ccccc1)NC(=O)C			CHEMBL56378,CHEMBL61205,CHEMBL61206	1	0.357143	0.678571
Benzylamine	1468002529	DB02464,EXPT00400	C15562	CHEMBL522	2-acetamido-N-benzyl-propanamide	2472433	CC(C(=O)NCc1ccccc1)NC(=O)C			CHEMBL56378,CHEMBL61205,CHEMBL61206	1	0.357143	0.678571
2-amino-N-ethylpropanamide	6330087			ChEMBLE_NTD	2-acetamido-N-ethylpropanamide	6331891	CCNC(=O)C(NC(=O)C)C			ChEMBLE_NTD	1	0.357143	0.678571
(3R)-3-Hydroxy-4-oxobutanoate	1469292704		C21761		3-[[(2S)-2-acetamidopropanoyl]amino]-4-oxo-butanoic acid	191415878	O=CC(NC(=O)C(NC(=O)C)C)CC(=O)O			CHEMBL76565	1	0.357143	0.678571
N-(2-oxoethyl)acetamide	6295127			ChEMBLE_NTD	3-acetamido-N-(2-acetamidoethyl)propanamide	279161556	O=C(CCNC(=O)C)NCCNC(=O)C			CHEMBL59061	1	0.357143	0.678571
N-Acetyl-beta-alanine	1467877411		C01073		3-acetamido-N-(2-acetamidoethyl)propanamide	279161556	O=C(CCNC(=O)C)NCCNC(=O)C			CHEMBL59061	1	0.357143	0.678571
methyl 5-aminolevulinate	1468384772	APRD01105,DB00992	D08204	CHEMBL1096562	5-[[(2S)-2-acetamido-4-methyl-1-oxopentyl]amino]-4-oxopentanoic acid methyl ester	119053069	COC(=O)CCC(=O)CNC(=O)C(NC(=O)C)CC(C)C			CHEMBL488327,CHEMBL520351	1	0.357143	0.678571
N-Acetyl-L-leucine	1467890765		C02710,D07350	ChEMBLE_NTD,CHEMBL174357,CHEMBL1875805,CHEMBL56021	5-[[(2S)-2-acetamido-4-methyl-1-oxopentyl]amino]-4-oxopentanoic acid methyl ester	119053069	COC(=O)CCC(=O)CNC(=O)C(NC(=O)C)CC(C)C			CHEMBL488327,CHEMBL520351	1	0.357143	0.678571
N-Acetyl-leucyl-leucine	1467969317		C11333	CHEMBL368756	Acetylleucyl-leucyl-norleucinal	1467969032	CCCCC(NC(=O)C(NC(=O)C(NC(=O)C)CC(C)C)CC(C)C)C=O		C11306	CHEMBL151937,CHEMBL304784	1	0.357143	0.678571
ethylpyruvate	1469415446	DB05869		CHEMBL173373	ethyl 2-acetamidopropanoate	107613958	CCOC(=O)C(NC(=O)C)C			CHEMBL3278815	1	0.357143	0.678571
N-Acetyl-leucyl-leucine	1467969317		C11333	CHEMBL368756	Leupeptin	1467881807	O=CC(NC(=O)C(NC(=O)C(NC(=O)C)CC(C)C)CC(C)C)CCCNC(=N)N		C01591	ChEMBLE MALARIA,CHEMBL191881,CHEMBL429947,CHEMBL433692	1	0.357143	0.678571
Benzoate	1467867945	DB03793,EXPT00675	C00180,C00539,D00038	ChEMBLE_NTD,CHEMBL541	N-(1-benzoyl-4-piperidyl)acetamide	279264721	O=C(c1ccccc1)N1CCC(CC1)NC(=O)C			CHEMBL74770	1	0.357143	0.678571
1-Methylparabanic acid	1467967189		C11116		N-(3-methyl-2,5-dioxo-4-imidazolidinyl)acetamide	6256669	CC(=O)NC1C(=O)NC(=O)N1C			ChEMBLE_NTD	1	0.357143	0.678571
N-Acetylputrescine	1467890812		C02714	CHEMBL81241	N-(4-acetamidobutyl)acetamide	6255010	CC(=O)NCCCCNC(=O)C			ChEMBLE_NTD	1	0.357143	0.678571
N4-Acetylaminobutanal	1467913450		C05936		N-(4-acetamidobutyl)acetamide	6255010	CC(=O)NCCCCNC(=O)C			ChEMBLE_NTD	1	0.357143	0.678571
4-Aminopyridine	1467984894	DB06637	C13728,D04127	ChEMBLE_NTD,CHEMBL284348	N-(4-pyridyl)acetamide	217285	CC(=O)Nc1ccncc1			CHEMBL11959	1	0.357143	0.678571
Adenine	1467867515		C00147,D00034	ChEMBLE_NTD,CHEMBL226345	N-(7H-purin-6-yl)acetamide	8362638	CC(=O)Nc1ncnc2c1[nH]cn2			CHEMBL569454	1	0.357143	0.678571
Hypoxanthine	1467869030		C00262	CHEMBL1427	N-(7H-purin-6-yl)acetamide	8362638	CC(=O)Nc1ncnc2c1[nH]cn2			CHEMBL569454	1	0.357143	0.678571
N-Acetyl-L-leucine	1467890765		C02710,D07350	ChEMBLE_NTD,CHEMBL174357,CHEMBL1875805,CHEMBL56021	N-[(1S)-1-[4-[4-(hydroxymethyl)triazol-1-yl]piperidine-1-carbonyl]-3-methyl-butyl]acetamide	300465425	OCc1nnn(c1)C1CCN(CC1)C(=O)C(NC(=O)C)CC(C)C			CHEMBL3478290	1	0.357143	0.678571
[(2R,4R)-4-(2,6-diaminopurin-9-yl)-1,3-dioxolan-2-yl]methanol	2367605	DB06619	D02890	CHEMBL147251,CHEMBL359305,CHEMBL458876	N-[2-amino-9-[(2R,4R)-2-(hydroxymethyl)-1,3-dioxolan-4-yl]-6-purinyl]acetamide	1114428872	OCC1OCC(O1)n1cnc2c1nc(N)nc2NC(=O)C			CHEMBL3358232	1	0.357143	0.678571
2-acetamido-4-methyl-2-pentenoic acid	6297317			ChEMBLE_NTD	N-Acetyl-L-leucine	1467890765	CC(CC(C(=O)O)NC(=O)C)C		C02710,D07350	ChEMBLE_NTD,CHEMBL174357,CHEMBL1875805,CHEMBL56021	1	0.357143	0.678571
2-acetamido-N-(1-benzyl-2-oxo-ethyl)-4-methyl-pentanamide	45311	DB07749			N-Acetyl-L-leucine	1467890765	CC(CC(C(=O)O)NC(=O)C)C		C02710,D07350	ChEMBLE_NTD,CHEMBL174357,CHEMBL1875805,CHEMBL56021	1	0.357143	0.678571
4-Methyl-2-oxopentanoate	1467868629		C00233	CHEMBL445647	N-Acetyl-L-leucine	1467890765	CC(CC(C(=O)O)NC(=O)C)C		C02710,D07350	ChEMBLE_NTD,CHEMBL174357,CHEMBL1875805,CHEMBL56021	1	0.357143	0.678571
Hydrogen peroxide	1467865888		C00027,D00008	ChEMBLE MALARIA,CHEMBL71595	N-Acetyl-L-leucine	1467890765	CC(CC(C(=O)O)NC(=O)C)C		C02710,D07350	ChEMBLE_NTD,CHEMBL174357,CHEMBL1875805,CHEMBL56021	1	0.357143	0.678571
N-Acetyl-leucyl-leucine	1467969317		C11333	CHEMBL368756	N-Acetyl-L-leucine	1467890765	CC(CC(C(=O)O)NC(=O)C)C		C02710,D07350	ChEMBLE_NTD,CHEMBL174357,CHEMBL1875805,CHEMBL56021	1	0.357143	0.678571
Acetylleucyl-leucyl-norleucinal	1467969032		C11306	CHEMBL151937,CHEMBL304784	N-Acetyl-leucyl-leucine	1467969317	CC(CC(C(=O)NC(C(=O)O)CC(C)C)NC(=O)C)C		C11333	CHEMBL368756	1	0.357143	0.678571
Leucyl-leucine	1467969307		C11332	CHEMBL1221715,CHEMBL1222324,CHEMBL292134,CHEMBL293480,CHEMBL54933	N-Acetyl-leucyl-leucine	1467969317	CC(CC(C(=O)NC(C(=O)O)CC(C)C)NC(=O)C)C		C11333	CHEMBL368756	1	0.357143	0.678571
Leupeptin	1467881807		C01591	ChEMBLE MALARIA,CHEMBL191881,CHEMBL429947,CHEMBL433692	N-Acetyl-leucyl-leucine	1467969317	CC(CC(C(=O)NC(C(=O)O)CC(C)C)NC(=O)C)C		C11333	CHEMBL368756	1	0.357143	0.678571
N-Acetyl-L-leucine	1467890765		C02710,D07350	ChEMBLE_NTD,CHEMBL174357,CHEMBL1875805,CHEMBL56021	N-Acetyl-leucyl-leucine	1467969317	CC(CC(C(=O)NC(C(=O)O)CC(C)C)NC(=O)C)C		C11333	CHEMBL368756	1	0.357143	0.678571
N-Acetyl-leu-leu-leu-tyr-amide	1467968920		C11296		N-Acetyl-leucyl-leucine	1467969317	CC(CC(C(=O)NC(C(=O)O)CC(C)C)NC(=O)C)C		C11333	CHEMBL368756	1	0.357143	0.678571
N-Acetyl-leu-leu-tyr	1467969286		C11330		N-Acetyl-leucyl-leucine	1467969317	CC(CC(C(=O)NC(C(=O)O)CC(C)C)NC(=O)C)C		C11333	CHEMBL368756	1	0.357143	0.678571
N-Acetyl-leu-leu-tyr-amide	1467968930		C11297		N-Acetyl-leucyl-leucine	1467969317	CC(CC(C(=O)NC(C(=O)O)CC(C)C)NC(=O)C)C		C11333	CHEMBL368756	1	0.357143	0.678571
N-Acetylleucyl-leucyl-methioninal	1467968889		C11292	CHEMBL1318024,CHEMBL318779	N-Acetyl-leucyl-leucine	1467969317	CC(CC(C(=O)NC(C(=O)O)CC(C)C)NC(=O)C)C		C11333	CHEMBL368756	1	0.357143	0.678571
N-[(S)-(5-chloro-8-hydroxy-7-quinolyl)-[4-(dimethylamino)phenyl]methyl]acetamide	12041481			ChEMBLE_NTD,CHEMBL580130	N-[(S)-[4-(dimethylamino)phenyl]-(8-hydroxy-7-quinolyl)methyl]acetamide	8661954	CC(=O)NC(c1ccc2c(c1O)nccc2)c1ccc(cc1)N(C)C			CHEMBL3112903	1	0.356746	0.678373
Colchicine	1467928119		C07592,D00570	ChEMBLE_NTD,CHEMBL107,CHEMBL330320,CHEMBL87	N-(4-bromo-1,2,3,10-tetramethoxy-9-oxo-6,7-dihydro-5H-benzo[a]heptalen-7-yl)acetamide	5358355	COc1c(OC)c2c3ccc(c(=O)cc3C(CCc2c(c1OC)Br)NC(=O)C)OC			CHEMBL1951578	1	0.356394	0.678197
Colchicine	1467928119		C07592,D00570	ChEMBLE_NTD,CHEMBL107,CHEMBL330320,CHEMBL87	N-(4-chloro-1,2,3,10-tetramethoxy-9-oxo-6,7-dihydro-5H-benzo[a]heptalen-7-yl)acetamide	5358344	COc1c(OC)c2c3ccc(c(=O)cc3C(CCc2c(c1OC)Cl)NC(=O)C)OC			CHEMBL1951577	1	0.356394	0.678197
Colchicine	1467928119		C07592,D00570	ChEMBLE_NTD,CHEMBL107,CHEMBL330320,CHEMBL87	N-(4-iodo-1,2,3,10-tetramethoxy-9-oxo-6,7-dihydro-5H-benzo[a]heptalen-7-yl)acetamide	5358366	COc1c(OC)c2c3ccc(c(=O)cc3C(CCc2c(c1OC)I)NC(=O)C)OC			CHEMBL1951579	1	0.356394	0.678197
2,3-dihydroxy-10,13-dimethyl-17-(6-methylheptan-2-yl)-1,2,3,7,8,9,11,12,14,15,16,17-dodecahydrocyclopenta[a]phenanthren-6-one	6327807			ChEMBLE_NTD	2-[2-[(2,5-dimethoxyphenyl)methylidene]hydrazinyl]-5-propan-2-yl-4-thiazolone	6324292	COc1c(OC)cc2c(c1OC)C13CCC(O1)(OC)C(=O)CC3C(CC2)NC(=O)C			ChEMBLE_NTD	1	0.347681	0.67384
6-(2-furanyl)-2-hexanamine	6332307			ChEMBLE_NTD,CHEMBL2078991	1-[2-acetyl-4-(4-chlorophenyl)-3-(4-methoxyphenyl)-1-methyl-3H-1,2,4,5-tetrazin-6-yl]ethanone	6310800	CC(=O)NC12CC3CCC(C1)CC(C2)C3			ChEMBLE_NTD	1	0.344388	0.672194
UDP-2-acetamido-4-amino-2,4,6-trideoxy-alpha-D-glucose	1467904370		C04630,C19961	ChEMBLE_NTD	(2R,3R,4R,5R,6R)-5-acetamido-3-[[(2S,3R,4S,5R,6R)-3-acetamido-5-amino-4-hydroxy-6-methyl-2-oxanyl]oxy]-4-hydroxy-6-methoxy-2-oxanecarboxylic acid	96801582	COC1OC(C(=O)O)C(C(C1NC(=O)C)O)OC1OC(C)C(C(C1NC(=O)C)O)N			CHEMBL67530	1	0.339286	0.669643
Flavomycin	1467921092		C06765		(2R)-3-[[(2R,3R,4R,5S,6S)-3-[[(2S,3R,4R,5S,6R)-3-acetamido-5-[[(2S,3R,4R,5S,6R)-3-acetamido-4-hydroxy-6-methyl-5-[[(2R,3R,4S,5R,6S)-3,4,5-trihydroxy-6-[[(2-hydroxy-5-oxo-1-cyclopentenyl)amino]-oxomethyl]-2-oxanyl]oxy]-2-oxanyl]oxy]-4-hydroxy-6-[[(2R,3R,4S,5S,6R)-3,4,5-trihydroxy-6-(hydroxymethyl)-2-oxanyl]oxymethyl]-2-oxanyl]oxy]-6-carbamoyl-4-carbamoyloxy-5-hydroxy-5-methyl-2-oxanyl]oxy-hydroxyp…	94985741	OCC1OC(OCC2OC(OC3C(OC(C(C3OC(=O)N)(C)O)C(=O)N)OP(=O)(OCC(C(=O)O)OCC=C(CCC=CC(CCC(=C)CC=C(CCC=C(C)C)C)(C)C)C)O)C(C(C2OC2OC(C)C(C(C2NC(=O)C)O)OC2OC(C(=O)NC3=C(O)CCC3=O)C(C(C2O)O)O)O)NC(=O)C)C(C(C1O)O)O			CHEMBL2029020,CHEMBL2367578	1	0.339286	0.669643
pyridine-3,4-diamine	61757	DB11640	D10228	CHEMBL354077	N-(3-amino-4-pyridyl)acetamide	104830940	CC(=O)Nc1ccncc1N			CHEMBL1928393	1	0.333333	0.666667
N-ACETYL-TRYPTOPHANAMIDE	1469402043			ChEMBLE_NTD,CHEMBL3186358,CHEMBL390937	(2R)-2-acetamido-N-[(1R)-1-acetamido-2-(1H-indol-3-yl)ethyl]-3-(1H-indol-3-yl)propanamide	108850982	CC(=O)NC(Cc1c[nH]c2c1cccc2)NC(=O)C(Cc1c[nH]c2c1cccc2)NC(=O)C			CHEMBL274970	1	0.309524	0.654762
2-Carboxybenzaldehyde	1467893369		C03057	CHEMBL234213	2-[[(3S,4R)-3-acetamido-4-isopropyl-pyrrolidin-1-yl]methyl]benzoic acid	544025957	CC(=O)NC1CN(CC1C(C)C)Cc1ccccc1C(=O)O			CHEMBL3482136	1	0.309524	0.654762
Daunorubicin	1467884615	APRD00521,DB00694	C01907,D07776	ChEMBLE_NTD,CHEMBL1197788,CHEMBL1525753,CHEMBL1617377,CHEMBL178,CHEMBL3278534,CHEMBL3560489,CHEMBL9659	N-[6-[(3-acetyl-3,5,12-trihydroxy-10-methoxy-6,11-dioxo-2,4-dihydro-1H-tetracen-1-yl)oxy]-3-hydroxy-2-methyl-4-oxanyl]acetamide	2283514	COc1cccc2c1C(=O)c1c(C2=O)c(O)c2c(c1O)C(OC1OC(C)C(C(C1)NC(=O)C)O)CC(C2)(O)C(=O)C			CHEMBL45945	1	0.297619	0.64881
(2R)-2-amino-3-(3-hydroxypropylthio)propanoic acid	2461753		D01845	CHEMBL1555183	(2R)-2-acetamido-3-(3-hydroxypropylthio)propanoic acid	2319992	CC(=O)NC(C(=O)O)CSCCCO			CHEMBL2075014	1	0.285714	0.642857
Acetylcysteine	1467921491	DB05436,DB06151	C06809,D00221	ChEMBLE_NTD,CHEMBL145615,CHEMBL507900,CHEMBL600	(2R)-2-acetamido-3-(3-hydroxypropylthio)propanoic acid	2319992	CC(=O)NC(C(=O)O)CSCCCO			CHEMBL2075014	1	0.285714	0.642857
(2R)-2-acetamido-3-(acetylthio)propanoic acid methyl ester	2017619			ChEMBLE_NTD	(2R)-2-acetamido-3-(acetylthio)propanoic acid	649056	CC(=O)SCC(C(=O)O)NC(=O)C		D07773	CHEMBL2106099	1	0.285714	0.642857
3-(acetylthio)-2-aminopropanoic acid	32595751	DB02039,EXPT02873			(2R)-2-acetamido-3-(acetylthio)propanoic acid	649056	CC(=O)SCC(C(=O)O)NC(=O)C		D07773	CHEMBL2106099	1	0.285714	0.642857
Acetylcysteine	1467921491	DB05436,DB06151	C06809,D00221	ChEMBLE_NTD,CHEMBL145615,CHEMBL507900,CHEMBL600	(2R)-2-acetamido-3-(acetylthio)propanoic acid	649056	CC(=O)SCC(C(=O)O)NC(=O)C		D07773	CHEMBL2106099	1	0.285714	0.642857
Acetylcysteine	1467921491	DB05436,DB06151	C06809,D00221	ChEMBLE_NTD,CHEMBL145615,CHEMBL507900,CHEMBL600	(2R)-2-acetamido-3-[(2-methyl-3-oxo-3-phenylpropyl)thio]propanoic acid	2930870	CC(C(=O)c1ccccc1)CSCC(C(=O)O)NC(=O)C			CHEMBL2104015	1	0.285714	0.642857
Acetylcysteine	1467921491	DB05436,DB06151	C06809,D00221	ChEMBLE_NTD,CHEMBL145615,CHEMBL507900,CHEMBL600	(2R)-2-acetamido-3-[(3-chlorophenyl)carbamoylsulfanyl]propanoic acid	340664876	CC(=O)NC(C(=O)O)CSC(=O)Nc1cccc(c1)Cl			CHEMBL1642100	1	0.285714	0.642857
Acetylcysteine	1467921491	DB05436,DB06151	C06809,D00221	ChEMBLE_NTD,CHEMBL145615,CHEMBL507900,CHEMBL600	(2R)-2-acetamido-3-[(3,5-dichlorophenyl)carbamoylsulfanyl]propanoic acid	340756705	O=C(Nc1cc(Cl)cc(c1)Cl)SCC(C(=O)O)NC(=O)C			CHEMBL1642099	1	0.285714	0.642857
Acetylcysteine	1467921491	DB05436,DB06151	C06809,D00221	ChEMBLE_NTD,CHEMBL145615,CHEMBL507900,CHEMBL600	(2R)-2-acetamido-3-[(4-methoxyphenyl)carbamoylsulfanyl]propanoic acid	340674795	COc1ccc(cc1)NC(=O)SCC(C(=O)O)NC(=O)C			CHEMBL1642098	1	0.285714	0.642857
Naproxen	1467881183		C01517,D00118	ChEMBLE_NTD,CHEMBL12952,CHEMBL154,CHEMBL1618254	(2R)-2-acetamido-3-[2-(6-methoxy-2-naphthyl)propanoylsulfanyl]propanoic acid	3015932	COc1ccc2c(c1)ccc(c2)C(C(=O)SCC(C(=O)O)NC(=O)C)C			CHEMBL2104532	1	0.285714	0.642857
Acetylcysteine	1467921491	DB05436,DB06151	C06809,D00221	ChEMBLE_NTD,CHEMBL145615,CHEMBL507900,CHEMBL600	(2R)-2-acetamido-3-allylsulfanyl-propanoic acid	2637509	CC(=O)NC(C(=O)O)CSCC=C			CHEMBL2074995	1	0.285714	0.642857
S-Allyl-L-cysteine	1468013456		C16759	CHEMBL1592541,CHEMBL2048654	(2R)-2-acetamido-3-allylsulfanyl-propanoic acid	2637509	CC(=O)NC(C(=O)O)CSCC=C			CHEMBL2074995	1	0.285714	0.642857
(2R)-2-acetamido-N-benzyl-3-methoxy-propanamide	3255080	DB06218	D07299	CHEMBL1213900,CHEMBL57293,CHEMBL58322,CHEMBL58323	(2R)-2-acetamido-N-[(3-fluorophenyl)methyl]-3-methoxypropanamide	95925854	COCC(C(=O)NCc1cccc(c1)F)NC(=O)C			CHEMBL299911	1	0.285714	0.642857
(2R)-2-acetamido-N-benzyl-3-methoxy-propanamide	3255080	DB06218	D07299	CHEMBL1213900,CHEMBL57293,CHEMBL58322,CHEMBL58323	(2R)-2-acetamido-N-[(4-fluorophenyl)methyl]-3-methoxypropanamide	96158887	COCC(C(=O)NCc1ccc(cc1)F)NC(=O)C			CHEMBL61094	1	0.285714	0.642857
L-Prolinamide	1468040315		C19781	CHEMBL1222059,CHEMBL1599880	(2S)-1-[(2S)-2-acetamido-3-hydroxy-propanoyl]pyrrolidine-2-carboxamide	126909623	OCC(C(=O)N1CCCC1C(=O)N)NC(=O)C			CHEMBL107453	1	0.285714	0.642857
(2S)-2-amino-3-(3,4-dihydroxyphenyl)propanoic acid methyl ester	238723		D07304	CHEMBL1328898,CHEMBL1621885	(2S)-2-[[(2R)-2-[[(2S)-2-acetamido-3-mercapto-1-oxopropyl]amino]-3-mercapto-1-oxopropyl]amino]-3-(3,4-dihydroxyphenyl)propanoic acid methyl ester	213708590	SCC(C(=O)NC(C(=O)OC)Cc1ccc(c(c1)O)O)NC(=O)C(NC(=O)C)CS			CHEMBL498419	1	0.285714	0.642857
Methyl caffeate	1467959771		C10477	CHEMBL17001	(2S)-2-[[(2R)-2-[[(2S)-2-acetamido-3-mercapto-1-oxopropyl]amino]-3-mercapto-1-oxopropyl]amino]-3-(3,4-dihydroxyphenyl)propanoic acid methyl ester	213708590	SCC(C(=O)NC(C(=O)OC)Cc1ccc(c(c1)O)O)NC(=O)C(NC(=O)C)CS			CHEMBL498419	1	0.285714	0.642857
Acetylcysteine	1467921491	DB05436,DB06151	C06809,D00221	ChEMBLE_NTD,CHEMBL145615,CHEMBL507900,CHEMBL600	(2S)-2-[[(2R)-2-acetamido-3-sulfanyl-propanoyl]amino]-3-(3-pyridyl)propanamide	279142233	SCC(C(=O)NC(C(=O)N)Cc1cccnc1)NC(=O)C			CHEMBL293481	1	0.285714	0.642857
Acetylcysteine	1467921491	DB05436,DB06151	C06809,D00221	ChEMBLE_NTD,CHEMBL145615,CHEMBL507900,CHEMBL600	(2S)-2-[[(2R)-2-acetamido-3-sulfanyl-propanoyl]amino]-3-methyl-butanamide	279142079	SCC(C(=O)NC(C(=O)N)C(C)C)NC(=O)C			CHEMBL56192	1	0.285714	0.642857
Acetylcysteine	1467921491	DB05436,DB06151	C06809,D00221	ChEMBLE_NTD,CHEMBL145615,CHEMBL507900,CHEMBL600	(2S)-2-[[(2R)-2-acetamido-3-sulfanyl-propanoyl]amino]-3-phenyl-propanamide	279141960	SCC(C(=O)NC(C(=O)N)Cc1ccccc1)NC(=O)C			CHEMBL55843	1	0.285714	0.642857
L-phenylalanine amide	1468073682	DB04029,EXPT02329		CHEMBL268713,CHEMBL350320	(2S)-2-[[(2R)-2-acetamido-3-sulfanyl-propanoyl]amino]-3-phenyl-propanamide	279141960	SCC(C(=O)NC(C(=O)N)Cc1ccccc1)NC(=O)C			CHEMBL55843	1	0.285714	0.642857
Leu-Val	1468283643			CHEMBL1222155	(2S)-2-[[(2S)-2-[[(2S)-2-acetamido-3-acetoxy-propanoyl]amino]-4-methyl-pentanoyl]amino]-3-methyl-butanoic acid	116078336	CC(CC(C(=O)NC(C(=O)O)C(C)C)NC(=O)C(NC(=O)C)COC(=O)C)C			CHEMBL444012	1	0.285714	0.642857
(2S)-1-[(2S)-2-[[(2S)-2-[[(2S)-2-acetamido-3-hydroxy-propanoyl]amino]-3-carboxy-propanoyl]amino]-6-amino-hexanoyl]pyrrolidine-2-carboxylic acid	651601			CHEMBL417044,CHEMBL420741	(3S)-3-[[(2S)-2-acetamido-3-hydroxy-propanoyl]amino]-4-[[(1S)-5-amino-1-(pyrrolidine-1-carbonyl)pentyl]amino]-4-oxo-butanoic acid	103987994	NCCCCC(C(=O)N1CCCC1)NC(=O)C(NC(=O)C(NC(=O)C)CO)CC(=O)O			CHEMBL435797	1	0.285714	0.642857
(2S)-2-[[(2S)-2-acetamido-3-hydroxy-propanoyl]amino]butanedioic acid	126243088			CHEMBL67900	(3S)-3-[[(2S)-2-acetamido-3-hydroxy-propanoyl]amino]-4-[[(1S)-5-amino-1-(pyrrolidine-1-carbonyl)pentyl]amino]-4-oxo-butanoic acid	103987994	NCCCCC(C(=O)N1CCCC1)NC(=O)C(NC(=O)C(NC(=O)C)CO)CC(=O)O			CHEMBL435797	1	0.285714	0.642857
(4R,7S,13S,19S,22S,25S,28S,31S,34R)-19,31-bis(4-aminobutyl)-34-[[2-[[(2S)-2-amino-1-oxopropyl]amino]-1-oxoethyl]amino]-10,16-bis[(1R)-1-hydroxyethyl]-7-(hydroxymethyl)-22-(1H-indol-3-ylmethyl)-6,9,12,15,18,21,24,27,30,33-decaoxo-13,25,28-tris(phenylmethyl)-1,2-dithia-5,8,11,14,17,20,23,26,29,32-decazacyclopentatriacontane-4-carboxylic acid	131757769	DB04931	D10511	CHEMBL3629347,CHEMBL407070,CHEMBL441738	(4R,7S,13S,19S,22S,25S,28S,31S,34R)-19,31-bis(4-aminobutyl)-34-[[2-[[(2S)-2-amino-1-oxopropyl]amino]-1-oxoethyl]amino]-10,16-bis[(1R)-1-hydroxyethyl]-7-(hydroxymethyl)-22-(1H-indol-3-ylmethyl)-6,9,12,15,18,21,24,27,30,33-decaoxo-13,25,28-tris(phenylmethyl)-1,2-dithia-5,8,11,14,17,20,23,26,29,32-decazacyclopentatriacontane-4-carboxylic acid	131757796	CCCCC(C(=O)NC(C(=O)NC(C(=O)NC(C(=O)NC(C(=O)NC(C(=O)NCC(=O)NC(C(=O)N1CCCC1C(=O)NC(C(=O)N)C(C)C)CCCCN)Cc1c[nH]c2c1cccc2)CCCNC(=N)N)Cc1ccccc1)Cc1[nH]cnc1)CCC(=O)O)NC(=O)C(NC(=O)C(NC(=O)C(NC(=O)C)CO)Cc1ccccc1)CO			CHEMBL2028976	1	0.285714	0.642857
Geranylgeraniol	1467942686		C09094	CHEMBL478589	<i>N</i>-acetyl-<i>S</i>-geranylgeranyl-L-cysteine	1469405914	CC(=CCCC(=CCSCC(C(=O)[O-])NC(=O)C)C)CCC=C(CCC=C(C)C)C			CHEMBL1407110	1	0.285714	0.642857
trans,trans-Farnesyl diphosphate	1467871046	DB07780	C00448,C16689,C16826,C19760	CHEMBL1160056,CHEMBL1160060,CHEMBL69330	<i>N</i>-acetyl-<i>S</i>-geranylgeranyl-L-cysteine	1469405914	CC(=CCCC(=CCSCC(C(=O)[O-])NC(=O)C)C)CCC=C(CCC=C(C)C)C			CHEMBL1407110	1	0.285714	0.642857
N-(4,6-dioxo-2-thioxo-hexahydropyrimidin-5-yl)acetamide	15827098			ChEMBLE_NTD	2-[(5-acetamido-4,6-dioxo-1H-pyrimidin-2-yl)thio]-N-(1-phenylethyl)acetamide	7324568	O=C(NC(c1ccccc1)C)CSC1=NC(=O)C(C(=O)N1)NC(=O)C			CHEMBL1500242	1	0.285714	0.642857
N-(4,6-dioxo-2-thioxo-hexahydropyrimidin-5-yl)acetamide	15827098			ChEMBLE_NTD	2-[(5-acetamido-4,6-dioxo-1H-pyrimidin-2-yl)thio]-N-cyclohexylacetamide	7326654	O=C(NC1CCCCC1)CSC1=NC(=O)C(C(=O)N1)NC(=O)C			CHEMBL1485316	1	0.285714	0.642857
2-acetamido-3-acetyloxypropanoic acid methyl ester	6298198			ChEMBLE_NTD	2-acetamido-3-(2-hydroxyethylthio)propanoic acid methyl ester	6312219	OCCSCC(C(=O)OC)NC(=O)C			ChEMBLE_NTD	1	0.285714	0.642857
2-acetamido-3-formyloxypropanoic acid methyl ester	6306869			ChEMBLE_NTD	2-acetamido-3-(2-hydroxyethylthio)propanoic acid methyl ester	6312219	OCCSCC(C(=O)OC)NC(=O)C			ChEMBLE_NTD	1	0.285714	0.642857
S-(2-Hydroxyethyl)-N-acetyl-L-cysteine	1467995958		C14876		2-acetamido-3-(2-hydroxyethylthio)propanoic acid methyl ester	6312219	OCCSCC(C(=O)OC)NC(=O)C			ChEMBLE_NTD	1	0.285714	0.642857
Acetylcysteine	1467921491	DB05436,DB06151	C06809,D00221	ChEMBLE_NTD,CHEMBL145615,CHEMBL507900,CHEMBL600	2-acetamido-3-(propyldisulfanyl)propanoic acid	6309883	CCCSSCC(C(=O)O)NC(=O)C			ChEMBLE_NTD	1	0.285714	0.642857
(4-bromophenyl)carbamic acid	2982022			ChEMBLE_NTD	2-acetamido-3-[(4-bromophenyl)carbamoylsulfanyl]propanoic acid	318097335	O=C(Nc1ccc(cc1)Br)SCC(C(=O)O)NC(=O)C			CHEMBL1642092	1	0.285714	0.642857
Acetylcysteine	1467921491	DB05436,DB06151	C06809,D00221	ChEMBLE_NTD,CHEMBL145615,CHEMBL507900,CHEMBL600	2-acetamido-3-[(4-bromophenyl)carbamoylsulfanyl]propanoic acid	318097335	O=C(Nc1ccc(cc1)Br)SCC(C(=O)O)NC(=O)C			CHEMBL1642092	1	0.285714	0.642857
Acetylcysteine	1467921491	DB05436,DB06151	C06809,D00221	ChEMBLE_NTD,CHEMBL145615,CHEMBL507900,CHEMBL600	2-acetamido-3-[(4-chlorophenyl)carbamoylsulfanyl]propanoic acid	97460173	O=C(Nc1ccc(cc1)Cl)SCC(C(=O)O)NC(=O)C			CHEMBL1642085	1	0.285714	0.642857
(5'R)-5'-hydroxy-1'-(hydroxymethyl)-2',5',7'-trimethyl-4'-spiro[cyclopropane-1,6'-indene]one	2595583		D04614	CHEMBL118218,CHEMBL380919	2-acetamido-3-[[(5'R)-5'-hydroxy-2',5',7'-trimethyl-4'-oxo-1'-spiro[cyclopropane-1,6'-indene]yl]methylthio]propanoic acid	97019606	CC(=O)NC(C(=O)O)CSCC1=C(C)C=C2C1=C(C)C1(C(C2=O)(C)O)CC1			CHEMBL323826	1	0.285714	0.642857
ethyl 2-acetamidoacetate	738901			CHEMBL3278870	2-acetamido-3-ethoxy-3-oxopropanoic acid	31782647	CCOC(=O)C(C(=O)O)NC(=O)C			CHEMBL1741370	1	0.285714	0.642857
2-acetamido-3-(2-hydroxyethylthio)propanoic acid methyl ester	6312219			ChEMBLE_NTD	2-acetamido-3-formyloxypropanoic acid methyl ester	6306869	O=COCC(C(=O)OC)NC(=O)C			ChEMBLE_NTD	1	0.285714	0.642857
(2R)-2-acetamido-N-benzyl-3-methoxy-propanamide	3255080	DB06218	D07299	CHEMBL1213900,CHEMBL57293,CHEMBL58322,CHEMBL58323	2-acetamido-N-benzyl-3-methoxy-N-methyl-propanamide	279279442	COCC(C(=O)N(Cc1ccccc1)C)NC(=O)C			CHEMBL77750	1	0.285714	0.642857
2-acetamido-3-methylpentanoic acid methyl ester	6299244			ChEMBLE_NTD	2-acetamidobutanoic acid methyl ester	94760635	CCC(C(=O)OC)NC(=O)C			CHEMBL3278811	1	0.285714	0.642857
3-Guanidinopropanoate	1467893433		C03065	CHEMBL20489	3-[[acetamido(amino)methylene]amino]propanoic acid	103814170	OC(=O)CCN=C(NC(=O)C)N			CHEMBL20513	1	0.285714	0.642857
3-Ureidopropionate	1467890295		C02642	CHEMBL20962	3-[[acetamido(amino)methylene]amino]propanoic acid	103814170	OC(=O)CCN=C(NC(=O)C)N			CHEMBL20513	1	0.285714	0.642857
(2R)-2-acetamido-N-benzyl-3-methoxy-propanamide	3255080	DB06218	D07299	CHEMBL1213900,CHEMBL57293,CHEMBL58322,CHEMBL58323	4-[[[(2R)-2-acetamido-3-methoxy-propanoyl]amino]methyl]benzoic acid	286290358	COCC(C(=O)NCc1ccc(cc1)C(=O)O)NC(=O)C			CHEMBL566572	1	0.285714	0.642857
4-(aminomethyl)benzoic acid	647431		D07568	CHEMBL328875	4-[[[(2R)-2-acetamido-3-methoxy-propanoyl]amino]methyl]benzoic acid	286290358	COCC(C(=O)NCc1ccc(cc1)C(=O)O)NC(=O)C			CHEMBL566572	1	0.285714	0.642857
(E)-7-methyl-4-decene	53406712			ChEMBLE_NTD	acetic acid [(Z)-2-chloroethenyl] ester	53405972	COC12CCC3(C(C1)CCC1C3(O2)C(SC(=S)NC(=O)C)CC2(C1CCC2(O)C(=O)COC(=O)C)C)C			ChEMBLE_NTD	1	0.285714	0.642857
diethyl 2-acetamido-2-(2-amino-9H-fluoren-9-yl)propanedioate	3422975			ChEMBLE_NTD	diethyl 2-acetamidopropanedioate	145198	CCOC(=O)C(C(=O)OCC)NC(=O)C			CHEMBL3278808	1	0.285714	0.642857
diethyl 2-acetamido-2-[3-(2-oxooxazolidin-3-yl)propyl]propanedioate	6288445			ChEMBLE_NTD	diethyl 2-acetamidopropanedioate	145198	CCOC(=O)C(C(=O)OCC)NC(=O)C			CHEMBL3278808	1	0.285714	0.642857
3-Amino-4-hydroxybenzoate	1467977224		C12115	CHEMBL242963	Grixazone B	1468047980	CC(=O)NC(C(=O)O)CSc1c2nc3cc(ccc3oc2cc(=O)c1N)C(=O)O		C20799	CHEMBL1224597	1	0.285714	0.642857
1-O-[2-(L-Cysteinamido)-2-deoxy-alpha-D-glucopyranosyl]-1D-myo-inositol	1468039710		C19703		Mycothiol	1467920603	SCC(C(=O)NC1C(OC(C(C1O)O)CO)OC1C(O)C(O)C(C(C1O)O)O)NC(=O)C		C06717	CHEMBL311443	1	0.285714	0.642857
6-(alpha-D-Glucosaminyl)-1D-myo-inositol	1468003403		C15658,C19702		Mycothiol	1467920603	SCC(C(=O)NC1C(OC(C(C1O)O)CO)OC1C(O)C(O)C(C(C1O)O)O)NC(=O)C		C06717	CHEMBL311443	1	0.285714	0.642857
Inositol 1-phosphate	1467878427		C01177,C03546,C04006,C06155	CHEMBL281435	Mycothiol	1467920603	SCC(C(=O)NC1C(OC(C(C1O)O)CO)OC1C(O)C(O)C(C(C1O)O)O)NC(=O)C		C06717	CHEMBL311443	1	0.285714	0.642857
Mycothione	1467970983		C11502		Mycothiol	1467920603	SCC(C(=O)NC1C(OC(C(C1O)O)CO)OC1C(O)C(O)C(C(C1O)O)O)NC(=O)C		C06717	CHEMBL311443	1	0.285714	0.642857
S-(Hydroxymethyl)mycothiol	1468026448		C18235		Mycothiol	1467920603	SCC(C(=O)NC1C(OC(C(C1O)O)CO)OC1C(O)C(O)C(C(C1O)O)O)NC(=O)C		C06717	CHEMBL311443	1	0.285714	0.642857
S-Formylmycothiol	1467920613		C06718		Mycothiol	1467920603	SCC(C(=O)NC1C(OC(C(C1O)O)CO)OC1C(O)C(O)C(C(C1O)O)O)NC(=O)C		C06717	CHEMBL311443	1	0.285714	0.642857
6-(alpha-D-Glucosaminyl)-1D-myo-inositol	1468003403		C15658,C19702		mycothiol-bimane conjugate|(PUBCHEM "90659339" NIL |kothari| 3641818093 NIL NIL)	1469327862	OCC1OC(OC2C(O)C(O)C(C(C2O)O)O)C(C(C1O)O)NC(=O)C(NC(=O)C)CSCc1n2c(C)c(c(=O)n2c(=O)c1C)C			CHEMBL82570	1	0.285714	0.642857
Mycothiol	1467920603		C06717	CHEMBL311443	mycothiol-bimane conjugate|(PUBCHEM "90659339" NIL |kothari| 3641818093 NIL NIL)	1469327862	OCC1OC(OC2C(O)C(O)C(C(C2O)O)O)C(C(C1O)O)NC(=O)C(NC(=O)C)CSCc1n2c(C)c(c(=O)n2c(=O)c1C)C			CHEMBL82570	1	0.285714	0.642857
DL-Cycloserine	1467920311		C06682,C08057,D00877	ChEMBLE_NTD,CHEMBL448864,CHEMBL771,CHEMBL8151	N-(3-oxoisoxazolidin-4-yl)acetamide	4218101	CC(=O)NC1CONC1=O			CHEMBL1741672,CHEMBL1971925	1	0.285714	0.642857
N-(2-methyl-3-oxo-4-isoxazolidinyl)acetamide	6290740			ChEMBLE_NTD	N-(3-oxoisoxazolidin-4-yl)acetamide	4218101	CC(=O)NC1CONC1=O			CHEMBL1741672,CHEMBL1971925	1	0.285714	0.642857
N-(4-amino-1,2,5-oxadiazol-3-yl)acetamide	6283322			ChEMBLE_NTD	N-(4-acetamido-1,2,5-oxadiazol-3-yl)-2-(2-pyridinylthio)acetamide	8029982	O=C(Nc1nonc1NC(=O)C)CSc1ccccn1			CHEMBL1713979	1	0.285714	0.642857
N-(4-amino-1,2,5-oxadiazol-3-yl)acetamide	6283322			ChEMBLE_NTD	N-(4-acetamido-1,2,5-oxadiazol-3-yl)-2-(4,5-dihydrothiazol-2-ylthio)acetamide	31446908	O=C(Nc1nonc1NC(=O)C)CSC1=NCCS1			CHEMBL1541076	1	0.285714	0.642857
N-(4-amino-1,2,5-oxadiazol-3-yl)acetamide	6283322			ChEMBLE_NTD	N-(4-acetamido-1,2,5-oxadiazol-3-yl)-2-phenoxyacetamide	10246756	O=C(Nc1nonc1NC(=O)C)COc1ccccc1			CHEMBL1542637	1	0.285714	0.642857
Phenoxyacetate	1467886852		C02181	CHEMBL173521	N-(4-acetamido-1,2,5-oxadiazol-3-yl)-2-phenoxyacetamide	10246756	O=C(Nc1nonc1NC(=O)C)COc1ccccc1			CHEMBL1542637	1	0.285714	0.642857
Phenoxyacetyl-CoA	1467889837		C02577		N-(4-acetamido-1,2,5-oxadiazol-3-yl)-2-phenoxyacetamide	10246756	O=C(Nc1nonc1NC(=O)C)COc1ccccc1			CHEMBL1542637	1	0.285714	0.642857
1-[5-(4-fluorophenyl)-1,5-dihydroimidazo[4,5-c][1,2,5]oxadiazol-4-yl]ethanone	53413681			ChEMBLE_NTD	N-(4-acetamido-1,2,5-oxadiazol-3-yl)-4-fluorobenzamide	8034671	CC(=O)Nc1nonc1NC(=O)c1ccc(cc1)F			CHEMBL1305325	1	0.285714	0.642857
4-Fluorobenzoate	1467888390		C02371	CHEMBL1775001,CHEMBL316860	N-(4-acetamido-1,2,5-oxadiazol-3-yl)-4-fluorobenzamide	8034671	CC(=O)Nc1nonc1NC(=O)c1ccc(cc1)F			CHEMBL1305325	1	0.285714	0.642857
4-Fluorobenzoyl-CoA	1467891493		C02802		N-(4-acetamido-1,2,5-oxadiazol-3-yl)-4-fluorobenzamide	8034671	CC(=O)Nc1nonc1NC(=O)c1ccc(cc1)F			CHEMBL1305325	1	0.285714	0.642857
N-(4-amino-1,2,5-oxadiazol-3-yl)acetamide	6283322			ChEMBLE_NTD	N-(4-acetamido-1,2,5-oxadiazol-3-yl)-4-fluorobenzamide	8034671	CC(=O)Nc1nonc1NC(=O)c1ccc(cc1)F			CHEMBL1305325	1	0.285714	0.642857
1,2,5-oxadiazole-3,4-diamine	6292822			ChEMBLE_NTD	N-(4-amino-1,2,5-oxadiazol-3-yl)acetamide	6283322	CC(=O)Nc1nonc1N			ChEMBLE_NTD	1	0.285714	0.642857
4-amino-1,2,5-oxadiazol-3-one	6302964			ChEMBLE_NTD	N-(4-amino-1,2,5-oxadiazol-3-yl)acetamide	6283322	CC(=O)Nc1nonc1N			ChEMBLE_NTD	1	0.285714	0.642857
ethyl 3-[(4-acetamido-1,2,5-oxadiazol-3-yl)amino]but-2-enoate	6305694			ChEMBLE_NTD	N-(4-amino-1,2,5-oxadiazol-3-yl)acetamide	6283322	CC(=O)Nc1nonc1N			ChEMBLE_NTD	1	0.285714	0.642857
2-acetamido-3-[(2-aminophenyl)thio]propanoic acid	6309949			ChEMBLE_NTD	N-(4-oxo-3,5-dihydro-2H-1,5-benzothiazepin-3-yl)acetamide	6308705	CC(=O)NC1CSc2c(NC1=O)cccc2			ChEMBLE_NTD	1	0.285714	0.642857
1,3-thiazolidine-2,4-dione	1468175401	DB11898		CHEMBL85398	N-(4-oxothiazol-2-yl)acetamide	6312034	CC(=O)NC1=NC(=O)CS1			ChEMBLE_NTD,CHEMBL1603750	1	0.285714	0.642857
2-aminothiazol-4-one	115501			ChEMBLE_NTD,CHEMBL2234650	N-(4-oxothiazol-2-yl)acetamide	6312034	CC(=O)NC1=NC(=O)CS1			ChEMBLE_NTD,CHEMBL1603750	1	0.285714	0.642857
Aromatic aldehyde	1467868131		C00193,C00261,D02314	CHEMBL15972	N-(benzylcarbamoyl)acetamide	6618479	O=C(NC(=O)C)NCc1ccccc1			CHEMBL96134	1	0.285714	0.642857
Benzylamine	1468002529	DB02464,EXPT00400	C15562	CHEMBL522	N-(benzylcarbamoyl)acetamide	6618479	O=C(NC(=O)C)NCc1ccccc1			CHEMBL96134	1	0.285714	0.642857
N-[(2R)-3-acetyl-2-(4-bromophenyl)-2H-1,3,4-thiadiazol-5-yl]acetamide	8395659			ChEMBLE_NTD,CHEMBL602966	N-[(2R)-3-acetyl-2-phenyl-2H-1,3,4-thiadiazol-5-yl]acetamide	7710476	CC(=O)N1N=C(SC1c1ccccc1)NC(=O)C			CHEMBL1712931	1	0.285714	0.642857
4-Bromophenylthiourea	1467993376		C14644		N-[(4-bromophenyl)carbamothioyl]acetamide	10560620	S=C(Nc1ccc(cc1)Br)NC(=O)C			CHEMBL2236335	1	0.285714	0.642857
2,4-Dichlorophenoxyacetate	1467897604		C03664	CHEMBL367623	N-[4-(acetylcarbamothioylamino)phenyl]-2-(2,4-dichlorophenoxy)acetamide	11278374	O=C(Nc1ccc(cc1)NC(=S)NC(=O)C)COc1ccc(cc1Cl)Cl			CHEMBL1430236	1	0.285714	0.642857
4-Chlorophenoxyacetate	1467923630		C07088	CHEMBL178018	N-[4-(acetylcarbamothioylamino)phenyl]-2-(4-chlorophenoxy)acetamide	11278352	O=C(Nc1ccc(cc1)NC(=S)NC(=O)C)COc1ccc(cc1)Cl			CHEMBL1327527	1	0.285714	0.642857
Leukotriene A4	1467875902		C00909	CHEMBL69439	N-Acetylleukotriene E4	1467969624	CCCCCC=CCC=CC=CC=CC(C(CCCC(=O)O)O)SCC(C(=O)O)NC(=O)C		C11361	CHEMBL1886123,CHEMBL2074714	1	0.285714	0.642857
Leukotriene E4	1467913628		C05952	CHEMBL509456	N-Acetylleukotriene E4	1467969624	CCCCCC=CCC=CC=CC=CC(C(CCCC(=O)O)O)SCC(C(=O)O)NC(=O)C		C11361	CHEMBL1886123,CHEMBL2074714	1	0.285714	0.642857
(2R)-2-acetamido-N-benzyl-3-methoxy-propanamide	3255080	DB06218	D07299	CHEMBL1213900,CHEMBL57293,CHEMBL58322,CHEMBL58323	O-Desmethyl-lacosamide	1469264345	OCC(C(=O)NCc1ccccc1)NC(=O)C			CHEMBL293954,CHEMBL57236	1	0.285714	0.642857
Aromatic aldehyde	1467868131		C00193,C00261,D02314	CHEMBL15972	O-Desmethyl-lacosamide	1469264345	OCC(C(=O)NCc1ccccc1)NC(=O)C			CHEMBL293954,CHEMBL57236	1	0.285714	0.642857
Benzylamine	1468002529	DB02464,EXPT00400	C15562	CHEMBL522	O-Desmethyl-lacosamide	1469264345	OCC(C(=O)NCc1ccccc1)NC(=O)C			CHEMBL293954,CHEMBL57236	1	0.285714	0.642857
(2R)-2-acetamido-3-(acetylthio)propanoic acid	649056		D07773	CHEMBL2106099	S-[2-[[(2R)-2-acetamido-3-acetylsulfanyl-propanoyl]amino]ethyl] 2-methylpropanethioate	6092305	CC(=O)NC(C(=O)NCCSC(=O)C(C)C)CSC(=O)C			CHEMBL52954	1	0.285714	0.642857
tat-BP	1469296529	DB04736		CHEMBL1652129	(2S,6R)-2-[[(4R)-4-[[(2S)-2-[2-[[(1R,2S,3R,4R,5R)-4-acetamido-2-[(2S,3R,4R,5S,6R)-3-acetamido-4,5-dihydroxy-6-(hydroxymethyl)tetrahydropyran-2-yl]oxy-6,8-dioxabicyclo[3.2.1]octan-3-yl]oxy]propanoylamino]propanoyl]amino]-4-carboxy-butanoyl]amino]-6-amino-heptanedioic acid	351956911	OCC1OC(OC2C3COC(O3)C(C2OC(C(=O)NC(C(=O)NC(C(=O)O)CCC(=O)NC(C(=O)O)CCCC(C(=O)O)N)C)C)NC(=O)C)C(C(C1O)O)NC(=O)C			CHEMBL1765921	1	0.267857	0.633929
Chitobiose	1467882468		C01674	CHEMBL1169569,CHEMBL1222104,CHEMBL1222122,CHEMBL3351097,CHEMBL467754	Allosamidine	1467908789	OCC1OC(OC2C(CO)C3C(C2O)N=C(O3)N(C)C)C(C(C1OC1OC(CO)C(C(C1NC(=O)C)O)O)O)NC(=O)C		C05346	CHEMBL1230997,CHEMBL318258	1	0.267857	0.633929
4-Deoxy-beta-D-gluc-4-enuronosyl-(1,3)-N-acetyl-D-galactosamine	1467879665		C01310,C04794	ChEMBLE_NTD	beta-D-GlcpA-(1->3)-beta-D-GlcpNAc-(1->4)-beta-D-GlcpA-(1->3)-D-GlcpNAc	1468232422	OCC1OC(OC2C(OC(C(C2O)O)OC2C(NC(=O)C)C(O)OC(C2O)CO)C(=O)O)C(C(C1O)OC1OC(C(=O)O)C(C(C1O)O)O)NC(=O)C			CHEMBL1697748,CHEMBL1874250	1	0.267857	0.633929
N-Acetyl-D-glucosamine	1467867422	DB03109,EXPT02281	C00140,C00645,C01132,C02711,C03136,C03878,C05021,C20328,C21036,C21039,C21049,C21052,C21061	ChEMBLE_NTD,CHEMBL1210905,CHEMBL1231391,CHEMBL1414815,CHEMBL240524,CHEMBL39064,CHEMBL447878,CHEMBL469447,CHEMBL83479	beta-D-GlcpNAc-(1->6)-D-GalpNAc	1468217551	OCC1OC(OCC2OC(O)C(C(C2O)O)NC(=O)C)C(C(C1O)O)NC(=O)C			CHEMBL1222108	1	0.267857	0.633929
N-Acetyl-D-mannosamine	1468065130		C00645	CHEMBL3182062	beta-D-GlcpNAc-(1->6)-D-GalpNAc	1468217551	OCC1OC(OCC2OC(O)C(C(C2O)O)NC(=O)C)C(C(C1O)O)NC(=O)C			CHEMBL1222108	1	0.267857	0.633929
Adenosine 3',5'-bisphosphate	1467866262	DB01812,EXPT00370	C00054	CHEMBL574817	Chitobiose	1467882468	OCC1OC(O)C(C(C1OC1OC(CO)C(C(C1NC(=O)C)O)O)O)NC(=O)C		C01674	CHEMBL1169569,CHEMBL1222104,CHEMBL1222122,CHEMBL3351097,CHEMBL467754	1	0.267857	0.633929
Allosamidine	1467908789		C05346	CHEMBL1230997,CHEMBL318258	Chitobiose	1467882468	OCC1OC(O)C(C(C1OC1OC(CO)C(C(C1NC(=O)C)O)O)O)NC(=O)C		C01674	CHEMBL1169569,CHEMBL1222104,CHEMBL1222122,CHEMBL3351097,CHEMBL467754	1	0.267857	0.633929
ATP	1467865531	DB00171,EXPT00007,NUTR00017	C00002,D08646	CHEMBL14249	Chitobiose	1467882468	OCC1OC(O)C(C(C1OC1OC(CO)C(C(C1NC(=O)C)O)O)O)NC(=O)C		C01674	CHEMBL1169569,CHEMBL1222104,CHEMBL1222122,CHEMBL3351097,CHEMBL467754	1	0.267857	0.633929
beta-D-GlcpNAc-(1->4)-beta-D-GlcpNAc-(1->4)-beta-D-GlcpNAc	1468270502	DB04194,EXPT01052		CHEMBL1222017,CHEMBL1222105	Chitobiose	1467882468	OCC1OC(O)C(C(C1OC1OC(CO)C(C(C1NC(=O)C)O)O)O)NC(=O)C		C01674	CHEMBL1169569,CHEMBL1222104,CHEMBL1222122,CHEMBL3351097,CHEMBL467754	1	0.267857	0.633929
N-Acetyl-beta-D-glucosaminyl-(1->4)-D-glucosamine	1468208870		C21747		Chitobiose	1467882468	OCC1OC(O)C(C(C1OC1OC(CO)C(C(C1NC(=O)C)O)O)O)NC(=O)C		C01674	CHEMBL1169569,CHEMBL1222104,CHEMBL1222122,CHEMBL3351097,CHEMBL467754	1	0.267857	0.633929
N-Acetyl-D-glucosamine	1467867422	DB03109,EXPT02281	C00140,C00645,C01132,C02711,C03136,C03878,C05021,C20328,C21036,C21039,C21049,C21052,C21061	ChEMBLE_NTD,CHEMBL1210905,CHEMBL1231391,CHEMBL1414815,CHEMBL240524,CHEMBL39064,CHEMBL447878,CHEMBL469447,CHEMBL83479	Chitobiose	1467882468	OCC1OC(O)C(C(C1OC1OC(CO)C(C(C1NC(=O)C)O)O)O)NC(=O)C		C01674	CHEMBL1169569,CHEMBL1222104,CHEMBL1222122,CHEMBL3351097,CHEMBL467754	1	0.267857	0.633929
N-Acetyl-D-glucosamine 1-phosphate	1467901708		C04256,C04501,C18055,C18060		Chitobiose	1467882468	OCC1OC(O)C(C(C1OC1OC(CO)C(C(C1NC(=O)C)O)O)O)NC(=O)C		C01674	CHEMBL1169569,CHEMBL1222104,CHEMBL1222122,CHEMBL3351097,CHEMBL467754	1	0.267857	0.633929
N-Acetyl-D-mannosamine	1468065130		C00645	CHEMBL3182062	Chitobiose	1467882468	OCC1OC(O)C(C(C1OC1OC(CO)C(C(C1NC(=O)C)O)O)O)NC(=O)C		C01674	CHEMBL1169569,CHEMBL1222104,CHEMBL1222122,CHEMBL3351097,CHEMBL467754	1	0.267857	0.633929
N,N'-Diacetylchitobiose 6'-phosphate	1468050621		C21152		Chitobiose	1467882468	OCC1OC(O)C(C(C1OC1OC(CO)C(C(C1NC(=O)C)O)O)O)NC(=O)C		C01674	CHEMBL1169569,CHEMBL1222104,CHEMBL1222122,CHEMBL3351097,CHEMBL467754	1	0.267857	0.633929
Chitobiose	1467882468		C01674	CHEMBL1169569,CHEMBL1222104,CHEMBL1222122,CHEMBL3351097,CHEMBL467754	N-[2-[[5-acetamido-6-[[5-(4-amino-2-oxo-1-pyrimidinyl)-3,4-dihydroxy-2-oxolanyl]methoxy]-4-hydroxy-2-(hydroxymethyl)-3-oxanyl]oxy]-4,5-dihydroxy-6-(hydroxymethyl)-3-oxanyl]acetamide	4950755	OCC1OC(OCC2OC(C(C2O)O)n2ccc(nc2=O)N)C(C(C1OC1OC(CO)C(C(C1NC(=O)C)O)O)O)NC(=O)C			CHEMBL2006974	1	0.267857	0.633929
Teicoplanin A3-1	1467983949		C13613	CHEMBL2105780,CHEMBL2367634	UID:400355161	400355161	OCC1OC(Oc2c3cc4cc2Oc2ccc(cc2Cl)CC2C(=O)NC(C(=O)NC4C(=O)NC4C(=O)NC(C(c5ccc(O3)c(Cl)c5)OC3OC(CO)C(C(C3NC(=O)C)O)O)C(=O)NC(c3c(c5cc4ccc5O)c(cc(c3)O)OC3OC(CO)C(C(C3O)O)O)C(=O)O)c3cc(O)cc(c3)Oc3cc(C(C(=O)N2)N)ccc3O)C(C(C1O)O)NC(=O)C			CHEMBL2367892	1	0.267857	0.633929
Veratraldehyde	1467887003		C02201	CHEMBL1088937	(2S)-2-acetamido-N-[(3,4-dimethoxyphenyl)methyl]-3-methylbutanamide	25249816	COc1cc(CNC(=O)C(C(C)C)NC(=O)C)ccc1OC			CHEMBL1312750	1	0.261905	0.630952
N-(6-hydroxy-4-oxo-2-thioxo-1H-pyrimidin-5-yl)acetamide	13108537			ChEMBLE_NTD	2-[(5-acetamido-4-hydroxy-6-oxo-1H-pyrimidin-2-yl)sulfanyl]-N-(m-tolyl)acetamide	8926589	O=C(Nc1cccc(c1)C)CSc1nc(O)c(c(=O)[nH]1)NC(=O)C			CHEMBL1410601	1	0.261905	0.630952
N-(6-hydroxy-4-oxo-2-thioxo-1H-pyrimidin-5-yl)acetamide	13108537			ChEMBLE_NTD	2-[(5-acetamido-4-hydroxy-6-oxo-1H-pyrimidin-2-yl)thio]-N-(2,6-dimethylphenyl)acetamide	13893753	O=C(Nc1c(C)cccc1C)CSc1nc(O)c(c(=O)[nH]1)NC(=O)C			CHEMBL1458421	1	0.261905	0.630952
Phenethylamine	1467908642		C05332	CHEMBL610	2-acetamido-3-methyl-N-(2-phenylethyl)butanamide	47738989	CC(C(C(=O)NCCc1ccccc1)NC(=O)C)C			CHEMBL124787	1	0.261905	0.630952
Phenylacetaldehyde	1467872719		C00601	CHEMBL1233464	2-acetamido-3-methyl-N-(2-phenylethyl)butanamide	47738989	CC(C(C(=O)NCCc1ccccc1)NC(=O)C)C			CHEMBL124787	1	0.261905	0.630952
methyl 5-aminolevulinate	1468384772	APRD01105,DB00992	D08204	CHEMBL1096562	5-[[(2S)-2-acetamido-3-methyl-1-oxobutyl]amino]-4-oxopentanoic acid methyl ester	119053080	COC(=O)CCC(=O)CNC(=O)C(C(C)C)NC(=O)C			CHEMBL449664,CHEMBL520476	1	0.261905	0.630952
5-Acetylamino-6-formylamino-3-methyluracil	1468009755		C16365		5-Acetylamino-6-amino-3-methyluracil	1468009766	CC(=O)Nc1c(N)[nH]c(=O)n(c1=O)C		C16366	CHEMBL1899490	1	0.261905	0.630952
ethyl (E)-4-(2-aminopropanoylamino)-6-methyl-hept-2-enoate	53415403			ChEMBLE_NTD	ethyl (E,4S)-4-[[(2S)-2-[[(2S)-2-acetamido-3-methyl-butanoyl]amino]propanoyl]amino]-6-methyl-hept-2-enoate	279898512	CCOC(=O)C=CC(NC(=O)C(NC(=O)C(C(C)C)NC(=O)C)C)CC(C)C			CHEMBL174890	1	0.261905	0.630952
N-(4,6-dioxo-2-thioxo-hexahydropyrimidin-5-yl)acetamide	15827098			ChEMBLE_NTD	N-(6-hydroxy-4-oxo-2-thioxo-1H-pyrimidin-5-yl)acetamide	13108537	CC(=O)Nc1c(O)[nH]c(=S)[nH]c1=O			ChEMBLE_NTD	1	0.261905	0.630952
4-aminoantipyrine	1468203753			ChEMBLE_NTD,CHEMBL1165011	N-[(1R)-2,2,2-trichloro-1-[(1,5-dimethyl-3-oxo-2-phenyl-4-pyrazolyl)amino]ethyl]acetamide	12071735	CC(=O)NC(C(Cl)(Cl)Cl)Nc1c(C)n(n(c1=O)c1ccccc1)C			CHEMBL1538147	1	0.261905	0.630952
Aromatic aldehyde	1467868131		C00193,C00261,D02314	CHEMBL15972	N-[(E,2S,3R)-1,3-dihydroxy-5-phenylpent-4-en-2-yl]acetamide	104862245	OCC(C(C=Cc1ccccc1)O)NC(=O)C			CHEMBL93103	1	0.261905	0.630952
N-(6-hydroxy-4-oxo-2-thioxo-1H-pyrimidin-5-yl)acetamide	13108537			ChEMBLE_NTD	N-[2-[(4-chlorophenyl)methylthio]-4-hydroxy-6-oxo-1H-pyrimidin-5-yl]acetamide	8363601	CC(=O)Nc1c(O)nc([nH]c1=O)SCc1ccc(cc1)Cl			CHEMBL1703321	1	0.261905	0.630952
N-(6-hydroxy-4-oxo-2-thioxo-1H-pyrimidin-5-yl)acetamide	13108537			ChEMBLE_NTD	N-[4-hydroxy-6-oxo-2-[2-oxo-2-(1-piperidyl)ethyl]sulfanyl-1H-pyrimidin-5-yl]acetamide	7970906	CC(=O)Nc1c(O)nc([nH]c1=O)SCC(=O)N1CCCCC1			CHEMBL1880741	1	0.261905	0.630952
Propranolol	1467926317		C07407,C11193,D08443	ChEMBLE_NTD,CHEMBL27,CHEMBL275742,CHEMBL452861	(2S)-2-acetamido-N-[2-hydroxy-3-(1-naphthyloxy)propyl]-N-isopropyl-3-methyl-3-nitrososulfanyl-butanamide	100475345	O=NSC(C(C(=O)N(C(C)C)CC(COc1cccc2c1cccc2)O)NC(=O)C)(C)C			CHEMBL363533	1	0.25	0.625
D-Glucosamine	1467869737		C00329,C02262,C03570,C08349,C21035,C21038,C21048,C21051,C21060,D04334	ChEMBLE MALARIA,CHEMBL234432,CHEMBL3304228,CHEMBL493287,CHEMBL606759	2-acetamido-3-methyl-3-(nitrosothio)-N-[2,4,5-trihydroxy-6-(hydroxymethyl)-3-oxanyl]butanamide	33215288	O=NSC(C(C(=O)NC1C(O)OC(C(C1O)O)CO)NC(=O)C)(C)C			CHEMBL424426,CHEMBL63959	1	0.25	0.625
N-acetyl-D-penicillamine	1468215636			ChEMBLE_NTD,CHEMBL1225	N-(2,2-dimethyl-4-oxo-3-thietanyl)acetamide	31440725	CC(=O)NC1C(=O)SC1(C)C			CHEMBL1449990	1	0.25	0.625
2-acetamido-2-[(5-chloro-2-pyridinyl)amino]-3,3,3-trifluoropropanoic acid methyl ester	6320437			ChEMBLE_NTD	2-acetamido-2-[(3,5-dichloro-2-pyridinyl)amino]-3,3,3-trifluoropropanoic acid methyl ester	6322505	COC(=O)C(C(F)(F)F)(Nc1ncc(cc1Cl)Cl)NC(=O)C			ChEMBLE_NTD	1	0.22619	0.613095
2-acetamido-2-[(5-bromo-2-pyridinyl)amino]-3,3,3-trifluoropropanoic acid methyl ester	6323266			ChEMBLE_NTD,CHEMBL1459554	2-acetamido-3,3,3-trifluoro-2-(2-pyridinylamino)propanoic acid methyl ester	6940577	COC(=O)C(C(F)(F)F)(Nc1ccccn1)NC(=O)C			CHEMBL1877757	1	0.22619	0.613095
2-acetamido-2-[(5-chloro-2-pyridinyl)amino]-3,3,3-trifluoropropanoic acid methyl ester	6320437			ChEMBLE_NTD	2-acetamido-3,3,3-trifluoro-2-(2-pyridinylamino)propanoic acid methyl ester	6940577	COC(=O)C(C(F)(F)F)(Nc1ccccn1)NC(=O)C			CHEMBL1877757	1	0.22619	0.613095
2-acetamido-2-[(4,6-dimethyl-1,3-benzothiazol-2-yl)amino]-3,3,3-trifluoropropanoic acid methyl ester	6325367			ChEMBLE_NTD,CHEMBL1479671	2-acetamido-3,3,3-trifluoro-2-[(6-methyl-1,3-benzothiazol-2-yl)amino]propanoic acid methyl ester	6324828	COC(=O)C(C(F)(F)F)(Nc1nc2c(s1)cc(cc2)C)NC(=O)C			ChEMBLE_NTD,CHEMBL1392087	1	0.22619	0.613095
ethyl 2-acetamido-3,3,3-trifluoro-2-[4-(trifluoromethyl)anilino]propanoate	6322441			ChEMBLE_NTD	ethyl 2-acetamido-3,3,3-trifluoro-2-[4-(trifluoromethoxy)anilino]propanoate	6323451	CCOC(=O)C(C(F)(F)F)(Nc1ccc(cc1)OC(F)(F)F)NC(=O)C			ChEMBLE_NTD	1	0.22619	0.613095
ethyl 2-acetamido-3,3,3-trifluoro-2-[4-(trifluoromethoxy)anilino]propanoate	6323451			ChEMBLE_NTD	ethyl 2-acetamido-3,3,3-trifluoro-2-[4-(trifluoromethyl)anilino]propanoate	6322441	CCOC(=O)C(C(F)(F)F)(Nc1ccc(cc1)C(F)(F)F)NC(=O)C			ChEMBLE_NTD	1	0.22619	0.613095
N-Acetyllactosamine	1467872809		C00611,C20887	CHEMBL457432	alpha-Neup5Ac-(2->3)-beta-D-Galp-(1->4)-D-GlcpNAc	1468182794	OCC1OC(OC2C(CO)OC(C(C2O)NC(=O)C)O)C(C(C1O)OC1(CC(O)C(C(O1)C(C(CO)O)O)NC(=O)C)C(=O)O)O			CHEMBL3215512	1	0.221599	0.610799
ethyl hex-4-enoate	6213218			ChEMBLE_NTD	ethyl 6-(2-acetamidothiazol-5-yl)sulfanylhexanoate	53081083	CCOC(=O)CCCCCSc1cnc(s1)NC(=O)C			CHEMBL126788	1	0.214286	0.607143
N-(3-acetonyl-1,3-benzothiazol-2-ylidene)acetamide	6320917			ChEMBLE_NTD	N-(1,3-benzothiazol-2-yl)acetamide	4574427	CC(=O)Nc1nc2c(s1)cccc2			CHEMBL2206133	1	0.214286	0.607143
N-(4-hydroxy-1,3-benzothiazol-2-yl)acetamide	6319044			ChEMBLE_NTD	N-(1,3-benzothiazol-2-yl)acetamide	4574427	CC(=O)Nc1nc2c(s1)cccc2			CHEMBL2206133	1	0.214286	0.607143
N-(4-hydroxy-1,3-benzothiazol-2-yl)acetamide	6319044			ChEMBLE_NTD	N-(4-fluoro-1,3-benzothiazol-2-yl)acetamide	52899304	CC(=O)Nc1sc2c(n1)c(F)ccc2			CHEMBL1714977	1	0.214286	0.607143
2-imino-1,2,3,4-tetrahydroquinazolin-4-one	1468342861	DB03780,EXPT00551		CHEMBL6993	N-(4-oxo-1H-quinazolin-2-yl)acetamide	120421678	CC(=O)Nc1nc(=O)c2c([nH]1)cccc2			CHEMBL6804	1	0.214286	0.607143
5-benzyl-6-methyl-1H-pyrimidine-2,4-dione	3432941			ChEMBLE_NTD,CHEMBL497915	N-(5-benzyl-6-methyl-4-oxo-1H-pyrimidin-2-yl)acetamide	9318562	CC(=O)Nc1nc(=O)c(c([nH]1)C)Cc1ccccc1			CHEMBL1486800	1	0.214286	0.607143
Benzyl alcohol	1467872290	DB06770	C00556,C03485,D00077	CHEMBL720	N-(5-benzylsulfanyl-1,3,4-thiadiazol-2-yl)acetamide	2152358	CC(=O)Nc1nnc(s1)SCc1ccccc1			CHEMBL173810	1	0.214286	0.607143
Bropirimine	1467982789		C13127,D01666	CHEMBL37387	N-(5-bromo-4-oxo-6-phenyl-1H-pyrimidin-2-yl)acetamide	123582609	CC(=O)Nc1nc(=O)c(c([nH]1)c1ccccc1)Br			CHEMBL285040	1	0.214286	0.607143
2-amino-8-phenyl-3,7-dihydropurin-6-one	2130969			ChEMBLE_NTD,CHEMBL3401359	N-(6-oxo-8-phenyl-3,7-dihydropurin-2-yl)acetamide	1114490096	CC(=O)Nc1nc(=O)c2c([nH]1)nc([nH]2)c1ccccc1			CHEMBL3401365	1	0.214286	0.607143
6-methyl-[1,2,4]triazolo[4,3-b][1,2,4]triazole-3,7-diamine	6283190			ChEMBLE_NTD	N-(7-amino-6-methyl-[1,2,4]triazolo[4,3-b][1,2,4]triazol-3-yl)acetamide	6313329	CC(=O)Nc1nnc2n1nc(n2N)C			ChEMBLE_NTD	1	0.214286	0.607143
D-Arabinono-1,4-lactone	1467873229		C00652,C01114,C02753,C02994	CHEMBL607627	N-[1-[(2R,3R,4S,5R)-3,4-dihydroxy-5-(hydroxymethyl)-2-oxolanyl]-1,2,4-triazol-3-yl]acetamide	280442271	OCC1OC(C(C1O)O)n1cnc(n1)NC(=O)C			CHEMBL249913	1	0.214286	0.607143
D-Ribose	1467867163		C00121,C01510,C06115,C16639,C20569,C21067	CHEMBL444125,CHEMBL606078	N-[1-[(2R,3R,4S,5R)-3,4-dihydroxy-5-(hydroxymethyl)-2-oxolanyl]-1,2,4-triazol-3-yl]acetamide	280442271	OCC1OC(C(C1O)O)n1cnc(n1)NC(=O)C			CHEMBL249913	1	0.214286	0.607143
N-[1-acetyl-5-(propylthio)-1,2,4-triazol-3-yl]acetamide	6314030			ChEMBLE_NTD	N-[3-(propylthio)-1H-1,2,4-triazol-5-yl]acetamide	52866286	CCCSc1n[nH]c(n1)NC(=O)C			CHEMBL1325638	1	0.214286	0.607143
Acetazolamide	1467921449		C06805,D00218	ChEMBLE_NTD,CHEMBL20	N-[5-(methylsulfamoyl)-1,3,4-thiadiazol-2-yl]acetamide	123907035	CNS(=O)(=O)c1nnc(s1)NC(=O)C			CHEMBL34910	1	0.214286	0.607143
4-Methylbenzyl alcohol	1467921003		C06757	CHEMBL90100	N-[5-(p-tolylmethylsulfanyl)-1,3,4-thiadiazol-2-yl]acetamide	45420430	CC(=O)Nc1nnc(s1)SCc1ccc(cc1)C			CHEMBL369862	1	0.214286	0.607143
3-Methoxybenzyl alcohol	1467895532		C03352		N-[5-[(3-methoxyphenyl)methylthio]-1,3,4-thiadiazol-2-yl]acetamide	15492438	COc1cccc(c1)CSc1nnc(s1)NC(=O)C			CHEMBL173915	1	0.214286	0.607143
N-[5-[2-(4-bromoanilino)-4-thiazolyl]-4-methyl-2-thiazolyl]acetamide	12619137			ChEMBLE_NTD,CHEMBL600947	N-[5-[2-(4-hydroxyanilino)-4-thiazolyl]-4-methyl-2-thiazolyl]acetamide	7396688	CC(=O)Nc1nc(c(s1)c1csc(n1)Nc1ccc(cc1)O)C			CHEMBL1621065	1	0.214286	0.607143
N-[5-[2-(4-chloroanilino)-4-thiazolyl]-4-methyl-2-thiazolyl]acetamide	11996050			ChEMBLE_NTD,CHEMBL548080	N-[5-[2-(4-hydroxyanilino)-4-thiazolyl]-4-methyl-2-thiazolyl]acetamide	7396688	CC(=O)Nc1nc(c(s1)c1csc(n1)Nc1ccc(cc1)O)C			CHEMBL1621065	1	0.214286	0.607143
p-Anisaldehyde	1467963254		C10761	CHEMBL161598	N-[5-[2-(4-methoxyphenyl)vinyl]-1,3,4-thiadiazol-2-yl]acetamide	49704911	COc1ccc(cc1)C=Cc1nnc(s1)NC(=O)C			CHEMBL1452811	1	0.214286	0.607143
Chitobiose	1467882468		C01674	CHEMBL1169569,CHEMBL1222104,CHEMBL1222122,CHEMBL3351097,CHEMBL467754	beta-D-GlcpNAc-(1->4)-[beta-D-GlcpNAc-(1->6)]-alpha-D-GalpNAc	1468270166	OCC1OC(OCC2OC(O)C(C(C2OC2OC(CO)C(C(C2NC(=O)C)O)O)O)NC(=O)C)C(C(C1O)O)NC(=O)C			CHEMBL1222110	1	0.178571	0.589286
Chitobiose	1467882468		C01674	CHEMBL1169569,CHEMBL1222104,CHEMBL1222122,CHEMBL3351097,CHEMBL467754	beta-D-GlcpNAc-(1->4)-beta-D-GlcpNAc-(1->4)-beta-D-GlcpNAc	1468270502	OCC1OC(OC2C(CO)OC(C(C2O)NC(=O)C)O)C(C(C1OC1OC(CO)C(C(C1NC(=O)C)O)O)O)NC(=O)C	DB04194,EXPT01052		CHEMBL1222017,CHEMBL1222105	1	0.178571	0.589286
Chitobiose	1467882468		C01674	CHEMBL1169569,CHEMBL1222104,CHEMBL1222122,CHEMBL3351097,CHEMBL467754	N-[(2S,3R,4R,5R,6R)-2-[[(2R,3R,4R,5R)-5-acetamido-4-[[(2R,3R,4R,5R,6R)-3-acetamido-4,5-dihydroxy-6-(hydroxymethyl)-2-oxanyl]oxy]-6-hydroxy-2-(hydroxymethyl)-3-oxanyl]oxy]-4,5-dihydroxy-6-(hydroxymethyl)-3-oxanyl]acetamide	294005748	OCC1OC(O)C(C(C1OC1OC(CO)C(C(C1NC(=O)C)O)O)OC1OC(CO)C(C(C1NC(=O)C)O)O)NC(=O)C			CHEMBL1222106,CHEMBL1222107	1	0.178571	0.589286
MM 4550	1468048096		C20815	CHEMBL1205386,CHEMBL1207623	(5R,6R)-3-[(E)-2-acetamidovinyl]sulfinyl-6-[(1S)-1-hydroxyethyl]-7-oxo-1-azabicyclo[3.2.0]hept-2-ene-2-carboxylic acid	60780751	CC(=O)NC=CS(=O)C1=C(C(=O)O)N2C(C1)C(C2=O)C(O)C			CHEMBL1206937,CHEMBL1207629	1	0.142857	0.571429
Aromatic aldehyde	1467868131		C00193,C00261,D02314	CHEMBL15972	1-acetamido-3-benzyl-urea	104590883	O=C(NNC(=O)C)NCc1ccccc1			CHEMBL34352	1	0.142857	0.571429
Benzylamine	1468002529	DB02464,EXPT00400	C15562	CHEMBL522	1-acetamido-3-benzyl-urea	104590883	O=C(NNC(=O)C)NCc1ccccc1			CHEMBL34352	1	0.142857	0.571429
sulfacetamide	1468231309	APRD00452,DB00634	D05947	ChEMBLE_NTD,CHEMBL455	2-[(2S)-1-(4-amino-1,3-dimethyl-2,6-dioxo-5-pyrimidinyl)-1-oxo-3-phenylpropan-2-yl]isoindole-1,3-dione	23249940	CC(=O)NS(=O)(=O)c1ccc(cc1)NC(=O)c1sc2c(c1)c(=O)n1c(n2)cccc1			CHEMBL1322874	1	0.142857	0.571429
Phthalate	1467881953	DB02746,EXPT02595	C01606	CHEMBL1045	2-[[4-(acetylsulfamoyl)phenyl]carbamoyl]benzoic acid	89540	CC(=O)NS(=O)(=O)c1ccc(cc1)NC(=O)c1ccccc1C(=O)O			CHEMBL2106951	1	0.142857	0.571429
sulfacetamide	1468231309	APRD00452,DB00634	D05947	ChEMBLE_NTD,CHEMBL455	2-[[4-(acetylsulfamoyl)phenyl]carbamoyl]benzoic acid	89540	CC(=O)NS(=O)(=O)c1ccc(cc1)NC(=O)c1ccccc1C(=O)O			CHEMBL2106951	1	0.142857	0.571429
[truncated: 80 more rows]

## Sheet: S8.3
Molecule name	Molecule NICEdrug ID	Molecule SMILES	Molecule fooDB ID	Food source of molecule	Alpha score within NICEdrug score	Beta score within NICEdrug score	NICEdrug score
[truncated: 22 more rows]

## Sheet: S8.4
Molecule name	Molecule NICEdrug ID	Molecule SMILES	Molecule DrugBank ID	Molecule KEGG ID	Molecule ChEMBL ID	Alpha score within NICEdrug score	Beta score within NICEdrug score	NICEdrug score
[truncated: 215 more rows]

[truncated: 3 more sheets: S8.5, S8.6, S8.7]
